# Supplementary material
Source: PubMed Central journal article supplement (PMC5207801)

# Analysis Summary: Age of First Menses

---

## Phenotype Description

---

Quantitative trait based on the following question:

- Research Snippets
  - How old were you when you had your first menstrual period? (Under 8, 8-9 years old, 10-11 years old, 12-13 years old, 14-15 years old, 16 years old or older, I'm not sure)

Responses were restricted to female customers and were scored from 0 to 5 from youngest to oldest.

## Phenotype Statistics

---

The following table shows demographics of unrelated, European individuals included in the GWAS.

| Phenotype        | Group   | Total | M | F     | (0,30] | (30,45] | (45,60] | (60,Inf] |
|------------------|---------|-------|---|-------|--------|---------|---------|----------|
| age_first_menses | under_8 | 39    | 0 | 39    | 8      | 17      | 9       | 5        |
|                  | 8-9     | 1535  | 0 | 1535  | 234    | 441     | 435     | 425      |
|                  | 10-11   | 16166 | 0 | 16166 | 2482   | 4246    | 4570    | 4868     |
|                  | 12-13   | 42946 | 0 | 42946 | 5876   | 11500   | 12795   | 12775    |
|                  | 14-15   | 13484 | 0 | 13484 | 1660   | 3548    | 4386    | 3890     |
|                  | 16+     | 2661  | 0 | 2661  | 276    | 657     | 941     | 787      |

The following table shows the phenotypic distribution across 23andMe genotyping platforms for individuals included in the GWAS.

| Phenotype        | Group   | Total | v1/v2 | v3    | v4   |
|------------------|---------|-------|-------|-------|------|
| age_first_menses | under_8 | 39    |       | 32    | 7    |
|                  | 8-9     | 1535  | 34    | 1205  | 296  |
|                  | 10-11   | 16166 | 393   | 12764 | 3009 |
|                  | 12-13   | 42946 | 1086  | 33844 | 8016 |
|                  | 14-15   | 13484 | 341   | 10704 | 2439 |
|                  | 16+     | 2661  | 65    | 2068  | 528  |

## Null Model with Covariates

---

The following table shows results of fitting a model for the trait based on just the covariates. Principal coordinates have been standardized, so these effect sizes are in units of standard deviations.

|      | Estimate | Std. Error | t value | Pr(> t )              |
|------|----------|------------|---------|-----------------------|
| age  | 0.00118  | 0.000182   | 6.5     | $1.0 \times 10^{-10}$ |
| pc.0 | 0.00832  | 0.002817   | 3.0     | 0.0031                |
| pc.1 | 0.02533  | 0.002826   | 9.0     | $3.2 \times 10^{-19}$ |
| pc.2 | -0.02647 | 0.002827   | -9.4    | $7.8 \times 10^{-21}$ |
| pc.3 | 0.00563  | 0.002813   | 2.0     | 0.045                 |
| pc.4 | 0.00364  | 0.002812   | 1.3     | 0.20                  |

## Q-Q plot of scaled residuals

---

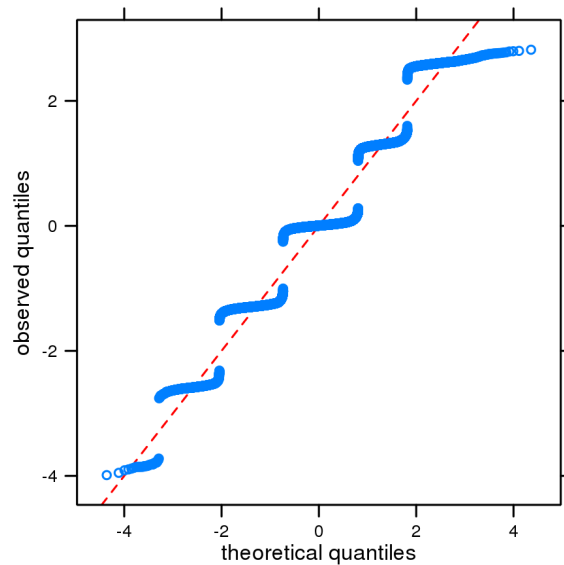

## SNP-level QC information

The following table shows results for QC filters on the genotyped data:

|                         | <b>failed</b> | <b>passed</b> |
|-------------------------|---------------|---------------|
| no filters              | 0             | 1030430       |
| not V1-only, chrM, chrY | 4790          | 1025640       |
| parent-offspring test   | 2129          | 1023511       |
| MAF > 0%                | 3203          | 1020494       |
| HWE > 1e-20             | 48225         | 972832        |
| gt.rate > 90%           | 30775         | 952826        |
| batch effects           | 28267         | 945446        |

The following table shows results for QC filters on the imputed dosage data:

|                    | <b>failed</b> | <b>passed</b> |
|--------------------|---------------|---------------|
| no filters         | 0             | 13733809      |
| MAF > 0%           | 0             | 13733809      |
| imputation quality | 0             | 13733809      |
| batch effects      | 2168          | 13731641      |

The following table shows results for QC filters on the merged association test results:

|                | <b>passed</b> | <b>total</b> |
|----------------|---------------|--------------|
| imputed only   | 12833621      | 12833621     |
| both passed    | 898002        | 13731623     |
| genotyped only | 47444         | 13779067     |
| no test result | -11514        | 13767553     |
| MAF < 0.1%     | -1728061      | 12039492     |

## Genetic Association Tests

We performed linear regression assuming an additive model for allelic effects, using the model:

$$age\_first\_menses \sim age + pc.0 + pc.1 + pc.2 + pc.3 + pc.4 + genotype$$

This genome-wide association analysis includes data from 76831 individuals of European ancestry, filtered to remove close relatives.

The results in this report have been adjusted for a genomic control inflation factor  $\lambda=1.174$ . The equivalent inflation factor rescaled for a sample size of 2000 would be  $\lambda_{2000}= 1.005$  , and for 20000,  $\lambda_{20000}= 1.045$  .

# Manhattan Plot

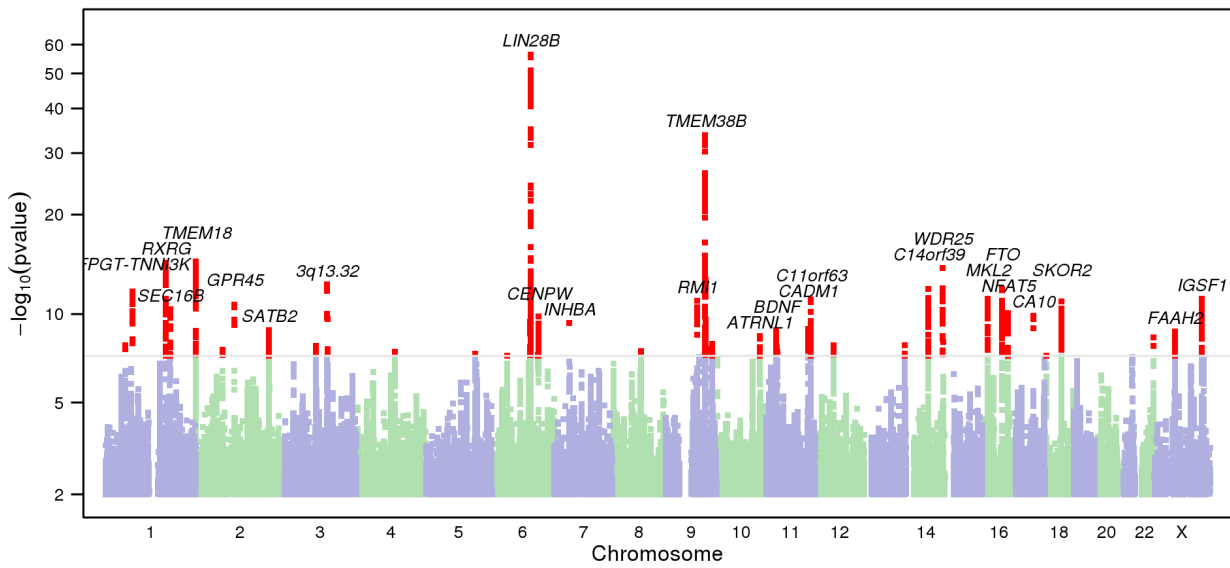

# Q-Q Plot of GWAS Results

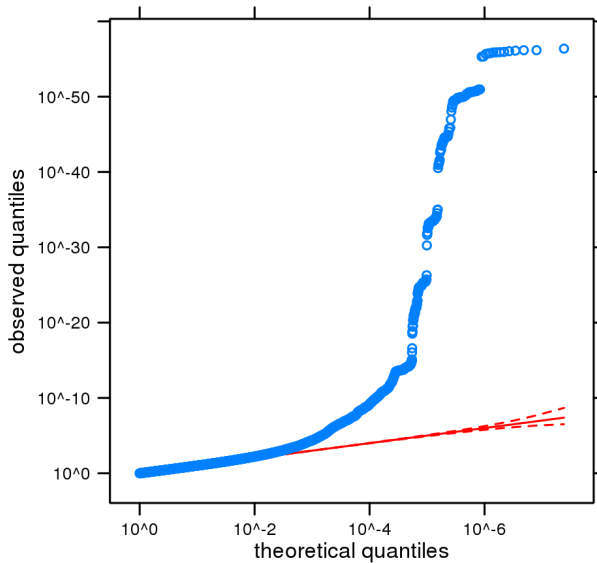

# Index SNPs for Strongest Associations

| cytoband | assay.name  | scaffold | position  | alleles | src | pvalue                | effect | 95% CI          | gene.context          |
|----------|-------------|----------|-----------|---------|-----|-----------------------|--------|-----------------|-----------------------|
| 6q16.3   | rs7766336   | chr6     | 105388405 | G/T     | I   | 4.2×10 <sup>-57</sup> | 0.074  | [0.065,0.083]   | HACE1--[]--LIN28B     |
| 9q31.2   | rs12686569  | chr9     | 108916711 | G/T     | I   | 1.7×10 <sup>-34</sup> | -0.057 | [-0.066,-0.048] | TMEM38B---[]---ZNF462 |
| 2p25.3   | rs201205097 | chr2     | 613044    | D/I     | I   | 3.1×10 <sup>-15</sup> | -0.044 | [-0.055,-0.033] | FAM150B---[]--TMEM18  |
| 1q23.3   | rs100537    | chr1     | 165413644 | A/G     | I   | 3.9×10 <sup>-15</sup> | -0.034 | [-0.042,-0.026] | [RXRG]                |
| 14q32.2  | rs12894936  | chr14    | 100846991 | C/T     | I   | 1.4×10 <sup>-14</sup> | -0.037 | [-0.046,-0.028] | [WDR25]               |
| 3q13.32  | rs6438424   | chr3     | 117574822 | A/C     | I   | 4.1×10 <sup>-13</sup> | 0.031  | [0.023,0.040]   | []                    |
| 14q23.1  | rs1254309   | chr14    | 60890422  | A/G     | I   | 1.1×10 <sup>-12</sup> | 0.038  | [0.028,0.049]   | PPM1A---[]--C14orf39  |
| 16q12.2  | rs1558902   | chr16    | 53803574  | A/T     | I   | 1.1×10 <sup>-12</sup> | 0.031  | [0.023,0.040]   | [FTO]                 |
| 1p31.1   | rs1040070   | chr1     | 74977870  | C/G     | I   | 1.7×10 <sup>-12</sup> | -0.031 | [-0.040,-0.022] | [FPGT-TNNI3K]         |
| 16p13.12 | rs1704528   | chr16    | 14388750  | C/T     | I   | 6.4×10 <sup>-12</sup> | -0.033 | [-0.042,-0.024] | MKL2--[]---PARN       |
| Xq26.2   | rs762080    | chrX     | 130534030 | A/C     | I   | 6.5×10 <sup>-12</sup> | 0.035  | [0.025,0.044]   | IGSF1---[]---OR13H1   |
| 11q24.1  | rs7113019   | chr11    | 122819119 | A/C     | I   | 7.1×10 <sup>-12</sup> | 0.030  | [0.021,0.038]   | [C11orf63]            |
| 9q21.32  | rs2378662   | chr9     | 86707289  | A/G     | I   | 9.5×10 <sup>-12</sup> | 0.030  | [0.021,0.038]   | RMI1--[]---SLC28A3    |
| 18q21.1  | rs2048523   | chr18    | 44799515  | A/G     | I   | 1.1×10 <sup>-11</sup> | -0.029 | [-0.038,-0.021] | SKOR2--[]---SMAD2     |
| 2q12.1   | rs2679894   | chr2     | 105870779 | A/G     | I   | 2.0×10 <sup>-11</sup> | -0.032 | [-0.042,-0.023] | GPR45--[]---TGFBRAP1  |
| 1q25.2   | rs571567    | chr1     | 177872905 | A/G     | I   | 4.6×10 <sup>-11</sup> | 0.036  | [0.025,0.047]   | FAM5B---[]--SEC16B    |
| 16q22.1  | rs6499244   | chr16    | 69735271  | A/T     | I   | 8.7×10 <sup>-11</sup> | 0.028  | [0.020,0.037]   | [NFAT5]               |

|          |             |       |           |     |   |                       |        |                 |                         |
|----------|-------------|-------|-----------|-----|---|-----------------------|--------|-----------------|-------------------------|
| 17q21.33 | rs9635759   | chr17 | 49613785  | A/G | I | 1.3×10 <sup>-10</sup> | -0.030 | [-0.039,-0.021] | UTP18---[---]CA10       |
| 6q22.32  | rs1490384   | chr6  | 126851160 | C/T | I | 1.4×10 <sup>-10</sup> | -0.028 | [-0.036,-0.019] | CENPW---[---]RSPO3      |
| 7p14.1   | rs4141153   | chr7  | 41467946  | A/G | I | 4.2×10 <sup>-10</sup> | 0.034  | [0.023,0.044]   | C7orf10---[---]INHBA    |
| 11q23.3  | rs5794958   | chr11 | 115044361 | D/I | I | 1.0×10 <sup>-9</sup>  | 0.031  | [0.021,0.041]   | [CADM1]                 |
| 2q33.1   | rs1456522   | chr2  | 199769183 | A/G | I | 1.3×10 <sup>-9</sup>  | -0.028 | [-0.038,-0.019] | PLCL1---[---]SATB2      |
| 11p14.1  | rs35051342  | chr11 | 27634373  | C/G | I | 1.4×10 <sup>-9</sup>  | -0.032 | [-0.043,-0.022] | LIN7C---[---]BDNF       |
| Xp11.21  | rs5914101   | chrX  | 57439945  | A/G | I | 1.6×10 <sup>-9</sup>  | 0.033  | [0.022,0.043]   | [FAAH2]                 |
| 10q25.3  | rs11349289  | chr10 | 117483568 | D/I | I | 3.2×10 <sup>-9</sup>  | 0.027  | [0.018,0.036]   | [ATRNL1]                |
| 22q13.33 | rs11703376  | chr22 | 49678713  | C/T | I | 3.7×10 <sup>-9</sup>  | -0.028 | [-0.038,-0.019] | FAM19A5---[---]C22orf34 |
| 9q33.3   | rs4072705   | chr9  | 127373463 | A/C | I | 9.7×10 <sup>-9</sup>  | -0.025 | [-0.033,-0.016] | [NR6A1]                 |
| 1p32.3   | rs630602    | chr1  | 54728864  | C/G | I | 1.1×10 <sup>-8</sup>  | 0.026  | [0.017,0.034]   | [SSBP3]                 |
| 13q34    | rs35413307  | chr13 | 112191778 | G/T | I | 1.2×10 <sup>-8</sup>  | 0.026  | [0.017,0.034]   | TEX29---[---]SOX1       |
| 12q13.12 | rs7306275   | chr12 | 50250111  | A/G | I | 1.2×10 <sup>-8</sup>  | 0.027  | [0.018,0.036]   | BCDIN3D---[---]FAIM2    |
| 3p12.1   | rs13068899  | chr3  | 86944938  | A/T | I | 1.3×10 <sup>-8</sup>  | 0.027  | [0.018,0.036]   | CADM2---[---]VGLL3      |
| 11p14.1  | rs11031005  | chr11 | 30226356  | C/T | I | 1.5×10 <sup>-8</sup>  | -0.035 | [-0.047,-0.023] | KCNA4---[---]FSHB       |
| 9q31.3   | rs10217747  | chr9  | 114309935 | C/T | I | 2.0×10 <sup>-8</sup>  | 0.025  | [0.017,0.034]   | ZNF483---[---]PTGR1     |
| 2p13.1   | rs35273932  | chr2  | 73739848  | G/T | I | 2.1×10 <sup>-8</sup>  | 0.116  | [0.075,0.157]   | [ALMS1]                 |
| 8q21.11  | rs10094574  | chr8  | 78116067  | A/G | I | 2.6×10 <sup>-8</sup>  | 0.027  | [0.018,0.037]   | PEX2---[---]            |
| 4q24     | rs112217694 | chr4  | 104641064 | C/G | I | 2.9×10 <sup>-8</sup>  | -0.053 | [-0.072,-0.034] | TACR3---[---]CXXC4      |
| 5q31.1   | rs13178130  | chr5  | 133905829 | C/T | I | 3.7×10 <sup>-8</sup>  | 0.025  | [0.016,0.034]   | [PHF15]                 |
| 6p21.1   | rs9349203   | chr6  | 41893323  | A/G | I | 4.7×10 <sup>-8</sup>  | 0.024  | [0.015,0.032]   | [BYSL]                  |
| 18p11.31 | rs35212912  | chr18 | 3816054   | D/I | I | 4.8×10 <sup>-8</sup>  | -0.030 | [-0.040,-0.019] | [DLGAP1]                |

## Quality Statistics for Index SNPs

| assay.name  | is.v2 | is.v3 | is.v4 | gt.rate | hw.p.value | p.date  | freq.b | avg.rsqr | min.rsqr | p.batch               | dose.b | qc.mask |
|-------------|-------|-------|-------|---------|------------|---------|--------|----------|----------|-----------------------|--------|---------|
| rs7766336   | FALSE | FALSE | FALSE |         |            |         |        | 0.9785   | 0.9758   | 0.089                 | 0.3188 | v2v3v4  |
| rs12686569  | TRUE  | TRUE  | TRUE  | 0.9971  | 0.67       | 0.27    | 0.3200 | 0.9998   | 0.9995   | 0.50                  | 0.3211 | v2v3v4  |
| rs201205097 | FALSE | FALSE | FALSE |         |            |         |        | 0.9903   | 0.9848   | 0.33                  | 0.8172 | v2v3v4  |
| rs100537    | TRUE  | TRUE  | TRUE  | 0.9992  | 0.40       | 0.94    | 0.5410 | 0.9955   | 0.9861   | 0.50                  | 0.5408 | v2v3v4  |
| rs12894936  | FALSE | FALSE | FALSE |         |            |         |        | 0.9389   | 0.9109   | 1.0                   | 0.3069 | v2v3v4  |
| rs6438424   | FALSE | FALSE | FALSE |         |            |         |        | 0.9966   | 0.9953   | 0.60                  | 0.4981 | v2v3v4  |
| rs1254309   | FALSE | FALSE | FALSE |         |            |         |        | 0.8462   | 0.8390   | 0.0010                | 0.2544 | v2v3v4  |
| rs1558902   | FALSE | TRUE  | TRUE  | 0.9992  | 0.071      | 0.55    | 0.5872 | 1.0000   | 0.9997   | 0.61                  | 0.5870 | v2v3v4  |
| rs1040070   | FALSE | FALSE | FALSE |         |            |         |        | 0.9928   | 0.9768   | 0.38                  | 0.4274 | v2v3v4  |
| rs1704528   | FALSE | FALSE | FALSE |         |            |         |        | 0.9049   | 0.6372   | 0.043                 | 0.6657 | v2v3v4  |
| rs762080    | FALSE | FALSE | FALSE |         |            |         |        | 0.9974   | 0.9917   | 9.0×10 <sup>-5</sup>  | 0.7561 | v2v3v4  |
| rs7113019   | FALSE | FALSE | FALSE |         |            |         |        | 0.9916   | 0.9851   | 0.020                 | 0.5102 | v2v3v4  |
| rs2378662   | FALSE | FALSE | FALSE |         |            |         |        | 0.9888   | 0.9706   | 0.052                 | 0.4548 | v2v3v4  |
| rs2048523   | TRUE  | TRUE  | TRUE  | 0.9990  | 0.52       | 0.64    | 0.5361 | 0.9986   | 0.9976   | 0.48                  | 0.5349 | v2v3v4  |
| rs2679894   | FALSE | FALSE | FALSE |         |            |         |        | 0.8072   | 0.6432   | 5.8×10 <sup>-5</sup>  | 0.5519 | v2v3v4  |
| rs571567    | FALSE | FALSE | FALSE |         |            |         |        | 0.9969   | 0.9959   | 0.037                 | 0.8122 | v2v3v4  |
| rs6499244   | FALSE | FALSE | FALSE |         |            |         |        | 0.9990   | 0.9965   | 0.59                  | 0.4539 | v2v3v4  |
| rs9635759   | FALSE | TRUE  | FALSE | 0.9809  | 0.00010    | 0.00016 | 0.6879 | 0.9964   | 0.9758   | 0.032                 | 0.6945 | v2v3v4  |
| rs1490384   | FALSE | FALSE | FALSE |         |            |         |        | 0.9892   | 0.9856   | 6.2×10 <sup>-5</sup>  | 0.5159 | v2v3v4  |
| rs4141153   | TRUE  | TRUE  | TRUE  | 0.9997  | 0.97       | 0.12    | 0.1981 | 0.9999   | 0.9994   | 0.085                 | 0.1975 | v2v3v4  |
| rs5794958   | FALSE | FALSE | FALSE |         |            |         |        | 0.9688   | 0.9490   | 0.89                  | 0.2481 | v2v3v4  |
| rs1456522   | FALSE | FALSE | FALSE |         |            |         |        | 0.9873   | 0.9748   | 0.00081               | 0.6874 | v2v3v4  |
| rs35051342  | FALSE | FALSE | FALSE |         |            |         |        | 0.9978   | 0.9953   | 0.79                  | 0.7902 | v2v3v4  |
| rs5914101   | FALSE | FALSE | FALSE |         |            |         |        | 0.9130   | 0.8820   | 1.5×10 <sup>-17</sup> | 0.7602 | v2v3v4  |
| rs11349289  | FALSE | FALSE | FALSE |         |            |         |        | 0.9659   | 0.9621   | 0.069                 | 0.6348 | v2v3v4  |
| rs11703376  | FALSE | TRUE  | FALSE | 0.9974  | 0.00054    | 0.70    | 0.2815 | 0.9931   | 0.9656   | 0.16                  | 0.2803 | v2v3v4  |
| rs4072705   | FALSE | FALSE | FALSE |         |            |         |        | 0.9916   | 0.9898   | 0.11                  | 0.4979 | v2v3v4  |
| rs630602    | FALSE | FALSE | FALSE |         |            |         |        | 0.9592   | 0.9538   | 0.0011                | 0.4149 | v2v3v4  |
| rs35413307  | FALSE | FALSE | FALSE |         |            |         |        | 0.9610   | 0.9487   | 0.70                  | 0.4068 | v2v3v4  |
| rs7306275   | FALSE | FALSE | FALSE |         |            |         |        | 0.8748   | 0.8645   | 0.0029                | 0.6243 | v2v3v4  |
| rs13068899  | FALSE | FALSE | FALSE |         |            |         |        | 0.8476   | 0.8380   | 0.00062               | 0.5987 | v2v3v4  |
| rs11031005  | FALSE | FALSE | FALSE |         |            |         |        | 0.9975   | 0.9957   | 0.083                 | 0.8604 | v2v3v4  |
| rs10217747  | FALSE | FALSE | FALSE |         |            |         |        | 0.9666   | 0.9340   | 0.21                  | 0.3817 | v2v3v4  |
| rs35273932  | FALSE | FALSE | FALSE |         |            |         |        | 0.8583   | 0.8065   | 0.0021                | 0.0126 | v2v3v4  |
| rs10094574  | FALSE | FALSE | FALSE |         |            |         |        | 0.9671   | 0.9553   | 0.74                  | 0.7246 | v2v3v4  |
| rs112217694 | FALSE | FALSE | FALSE |         |            |         |        | 0.9299   | 0.9195   | 0.053                 | 0.9432 | v2v3v4  |
| rs13178130  | TRUE  | TRUE  | TRUE  | 0.9997  | 0.081      | 0.0077  | 0.3668 | 0.9959   | 0.9910   | 0.0028                | 0.3670 | v2v3v4  |
| rs9349203   | FALSE | FALSE | FALSE |         |            |         |        | 0.9893   | 0.9814   | 0.51                  | 0.4602 | v2v3v4  |
| rs35212912  | FALSE | FALSE | FALSE |         |            |         |        | 0.9720   | 0.9682   | 0.92                  | 0.7187 | v3      |

## SNP Statistics in the GWAS Sample

| assay.name  | AA.0  | AB.0  | BB.0  | im.num.0 | dose.b.0 |
|-------------|-------|-------|-------|----------|----------|
| rs7766336   |       |       |       | 76831    | 0.3225   |
| rs12686569  | 35596 | 33359 | 7707  | 76831    | 0.3189   |
| rs201205097 |       |       |       | 76831    | 0.8205   |
| rs100537    | 16359 | 38002 | 22396 | 76831    | 0.5386   |
| rs12894936  |       |       |       | 76831    | 0.3035   |
| rs6438424   |       |       |       | 76831    | 0.4994   |
| rs1254309   |       |       |       | 76831    | 0.2519   |
| rs1558902   | 12286 | 35916 | 26668 | 76831    | 0.5961   |
| rs1040070   |       |       |       | 76831    | 0.4266   |
| rs1704528   |       |       |       | 76831    | 0.6659   |

|             |       |       |       |       |        |
|-------------|-------|-------|-------|-------|--------|
| rs762080    |       |       |       | 76831 | 0.7579 |
| rs7113019   |       |       |       | 76831 | 0.5091 |
| rs2378662   |       |       |       | 76831 | 0.4557 |
| rs2048523   | 16300 | 38174 | 22296 | 76831 | 0.5393 |
| rs2679894   |       |       |       | 76831 | 0.5571 |
| rs571567    |       |       |       | 76831 | 0.8074 |
| rs6499244   |       |       |       | 76831 | 0.4499 |
| rs9635759   | 5666  | 25733 | 28042 | 76831 | 0.6936 |
| rs1490384   |       |       |       | 76831 | 0.5099 |
| rs4141153   | 49563 | 24263 | 2989  | 76831 | 0.1968 |
| rs5794958   |       |       |       | 76831 | 0.2537 |
| rs1456522   |       |       |       | 76831 | 0.6815 |
| rs35051342  |       |       |       | 76831 | 0.7960 |
| rs5914101   |       |       |       | 76831 | 0.7686 |
| rs11349289  |       |       |       | 76831 | 0.6357 |
| rs11703376  | 31776 | 23912 | 4799  | 76831 | 0.2759 |
| rs4072705   |       |       |       | 76831 | 0.4998 |
| rs630602    |       |       |       | 76831 | 0.4120 |
| rs35413307  |       |       |       | 76831 | 0.4048 |
| rs7306275   |       |       |       | 76831 | 0.6254 |
| rs13068899  |       |       |       | 76831 | 0.5966 |
| rs11031005  |       |       |       | 76831 | 0.8592 |
| rs10217747  |       |       |       | 76831 | 0.3790 |
| rs35273932  |       |       |       | 76831 | 0.0126 |
| rs10094574  |       |       |       | 76831 | 0.7231 |
| rs112217694 |       |       |       | 76831 | 0.9431 |
| rs13178130  | 31058 | 35595 | 10162 | 76831 | 0.3631 |
| rs9349203   |       |       |       | 76831 | 0.4549 |
| rs35212912  |       |       |       | 60351 | 0.7166 |

## Annotations from NHGRI GWAS Catalog

The following table shows, for each index SNP, all entries in the NHGRI GWAS Catalog that are within 500kb and in at least moderate linkage disequilibrium ( $r^2 > 0.5$ ).

| region  | position  | our.name    | our.pval              | dist   | rsqr  | assay.name | pvalue                 | pubmed.id | trait                                 | genes                 |
|---------|-----------|-------------|-----------------------|--------|-------|------------|------------------------|-----------|---------------------------------------|-----------------------|
| 6q16.3  | 105388405 | rs7766336   | $4.2 \times 10^{-57}$ | -20789 | 0.983 | rs9391253  | $5.0 \times 10^{-12}$  | 23563607  | Height                                | LIN28B                |
| 6q16.3  | 105388405 | rs7766336   | $4.2 \times 10^{-57}$ | -9451  | 0.971 | rs7759938  | $4.0 \times 10^{-9}$   | 23449627  | Pubertal anthropometrics              | LIN28B                |
| 6q16.3  | 105388405 | rs7766336   | $4.2 \times 10^{-57}$ | -9451  | 0.971 | rs7759938  | $5.0 \times 10^{-60}$  | 21102462  | Menarche (age at onset)               | LIN28B                |
| 6q16.3  | 105388405 | rs7766336   | $4.2 \times 10^{-57}$ | -9451  | 0.971 | rs7759938  | $8.0 \times 10^{-31}$  | 20881960  | Height                                | LIN28B                |
| 6q16.3  | 105388405 | rs7766336   | $4.2 \times 10^{-57}$ | -9451  | 0.971 | rs7759938  | $7.0 \times 10^{-9}$   | 19448620  | Menarche (age at onset)               | LIN28B                |
| 6q16.3  | 105388405 | rs7766336   | $4.2 \times 10^{-57}$ | 12432  | 0.575 | rs314280   | $2.0 \times 10^{-14}$  | 19448622  | Menarche (age at onset)               | LIN28B, HACE1, ...    |
| 6q16.3  | 105388405 | rs7766336   | $4.2 \times 10^{-57}$ | 19594  | 0.943 | rs314276   | $4.0 \times 10^{-16}$  | 19448623  | Menarche (age at onset)               | LIN28B                |
| 6q16.3  | 105388405 | rs7766336   | $4.2 \times 10^{-57}$ | 29573  | 0.943 | rs314268   | $8.0 \times 10^{-7}$   | 18391951  | Height                                | LIN28B, HACE1, ...    |
| 6q16.3  | 105388405 | rs7766336   | $4.2 \times 10^{-57}$ | 54784  | 0.640 | rs364663   | $5.0 \times 10^{-7}$   | 23667675  | Menarche (age at onset)               | LIN28B                |
| 9q31.2  | 108916711 | rs12686569  | $1.7 \times 10^{-34}$ | 19963  | 0.521 | rs7861820  | $3.0 \times 10^{-9}$   | 19448621  | Menarche and menopause (age at onset) | Intergenic            |
| 9q31.2  | 108916711 | rs12686569  | $1.7 \times 10^{-34}$ | 50377  | 0.940 | rs2090409  | $2.0 \times 10^{-6}$   | 23449627  | Pubertal anthropometrics              | TMEM38B               |
| 9q31.2  | 108916711 | rs12686569  | $1.7 \times 10^{-34}$ | 50377  | 0.940 | rs2090409  | $2.0 \times 10^{-33}$  | 21102462  | Menarche (age at onset)               | TMEM38B               |
| 9q31.2  | 108916711 | rs12686569  | $1.7 \times 10^{-34}$ | 50377  | 0.940 | rs2090409  | $2.0 \times 10^{-9}$   | 19448620  | Menarche (age at onset)               | TMEM38B, SLC44A1, ... |
| 2p25.3  | 613044    | rs201205097 | $3.1 \times 10^{-15}$ | 1124   | 0.973 | rs2947411  | $2.0 \times 10^{-8}$   | 21102462  | Menarche (age at onset)               | TMEM18                |
| 2p25.3  | 613044    | rs201205097 | $3.1 \times 10^{-15}$ | 9783   | 0.964 | rs2867125  | $3.0 \times 10^{-49}$  | 20935630  | Body mass index                       | TMEM18                |
| 2p25.3  | 613044    | rs201205097 | $3.1 \times 10^{-15}$ | 10990  | 0.964 | rs6711012  | $6.0 \times 10^{-35}$  | 23563607  | Obesity                               | TMEM18                |
| 2p25.3  | 613044    | rs201205097 | $3.1 \times 10^{-15}$ | 11634  | 0.964 | rs2903492  | $6.0 \times 10^{-15}$  | 23563607  | Body mass index                       | TMEM18                |
| 2p25.3  | 613044    | rs201205097 | $3.1 \times 10^{-15}$ | 16200  | 0.921 | rs12463617 | $3.0 \times 10^{-17}$  | 23669352  | Body mass index                       | TMEM18                |
| 2p25.3  | 613044    | rs201205097 | $3.1 \times 10^{-15}$ | 16200  | 0.921 | rs12463617 | $2.0 \times 10^{-13}$  | 23563609  | Obesity (early onset extreme)         | TMEM18                |
| 2p25.3  | 613044    | rs201205097 | $3.1 \times 10^{-15}$ | 21861  | 0.921 | rs6548238  | $1.0 \times 10^{-18}$  | 19079261  | Body mass index                       | TMEM18                |
| 2p25.3  | 613044    | rs201205097 | $3.1 \times 10^{-15}$ | 31909  | 0.904 | rs7561317  | $2.0 \times 10^{-18}$  | 19079260  | Weight                                | TMEM18                |
| 2p25.3  | 613044    | rs201205097 | $3.1 \times 10^{-15}$ | 31909  | 0.904 | rs7561317  | $4.0 \times 10^{-17}$  | 19079260  | Body mass index                       | TMEM18                |
| 3q13.32 | 117574822 | rs6438424   | $4.1 \times 10^{-13}$ | 0      | 1.000 | rs6438424  | $1.0 \times 10^{-13}$  | 21102462  | Menarche (age at onset)               | Intergenic            |
| 14q23.1 | 60890422  | rs1254309   | $1.1 \times 10^{-12}$ | 13335  | 0.671 | rs1254319  | $1.0 \times 10^{-8}$   | 23396134  | Refractive error                      | SIX6                  |
| 16q12.2 | 53803574  | rs1558902   | $1.1 \times 10^{-12}$ | -2820  | 0.963 | rs9940128  | $4.0 \times 10^{-23}$  | 23669352  | Body mass index                       | FTO                   |
| 16q12.2 | 53803574  | rs1558902   | $1.1 \times 10^{-12}$ | -2820  | 0.963 | rs9940128  | $2.0 \times 10^{-9}$   | 22399527  | Metabolic syndrome                    | FTO                   |
| 16q12.2 | 53803574  | rs1558902   | $1.1 \times 10^{-12}$ | -2620  | 1.000 | rs1421085  | $1.0 \times 10^{-9}$   | 23636237  | Dietary macronutrient intake          | FTO                   |
| 16q12.2 | 53803574  | rs1558902   | $1.1 \times 10^{-12}$ | -2620  | 1.000 | rs1421085  | $3.0 \times 10^{-28}$  | 23563609  | Obesity (early onset extreme)         | FTO                   |
| 16q12.2 | 53803574  | rs1558902   | $1.1 \times 10^{-12}$ | -2620  | 1.000 | rs1421085  | $1.0 \times 10^{-28}$  | 19151714  | Obesity                               | FTO                   |
| 16q12.2 | 53803574  | rs1558902   | $1.1 \times 10^{-12}$ | 0      | 1.000 | rs1558902  | $1.0 \times 10^{-7}$   | 21544081  | Obesity                               | FTO                   |
| 16q12.2 | 53803574  | rs1558902   | $1.1 \times 10^{-12}$ | 0      | 1.000 | rs1558902  | $5.0 \times 10^{-120}$ | 20935630  | Body mass index                       | FTO                   |
| 16q12.2 | 53803574  | rs1558902   | $1.1 \times 10^{-12}$ | 0      | 1.000 | rs1558902  | $7.0 \times 10^{-13}$  | 20421936  | Obesity (extreme)                     | FTO                   |
| 16q12.2 | 53803574  | rs1558902   | $1.1 \times 10^{-12}$ | 0      | 1.000 | rs1558902  | $5.0 \times 10^{-19}$  | 19557197  | Waist circumference                   | FTO                   |
| 16q12.2 | 53803574  | rs1558902   | $1.1 \times 10^{-12}$ | 5673   | 0.963 | rs1121980  | $4.0 \times 10^{-8}$   | 18454148  | Body mass index                       | FTO                   |
| 16q12.2 | 53803574  | rs1558902   | $1.1 \times 10^{-12}$ | 5673   | 0.963 | rs1121980  | $1.0 \times 10^{-7}$   | 18159244  | Obesity (early onset extreme)         | FTO                   |
| 16q12.2 | 53803574  | rs1558902   | $1.1 \times 10^{-12}$ | 9793   | 0.932 | rs17817449 | $6.0 \times 10^{-7}$   | 23535733  | Breast cancer                         | MIR1972-2, FTO        |
| 16q12.2 | 53803574  | rs1558902   | $1.1 \times 10^{-12}$ | 9793   | 0.932 | rs17817449 | $6.0 \times 10^{-14}$  | 23535729  | Breast cancer                         | MIR1972-2, FTO        |
| 16q12.2 | 53803574  | rs1558902   | $1.1 \times 10^{-12}$ | 9793   | 0.932 | rs17817449 | $2.0 \times 10^{-12}$  | 21552555  | Obesity                               | FTO                   |
| 16q12.2 | 53803574  | rs1558902   | $1.1 \times 10^{-12}$ | 9876   | 0.927 | rs8043757  | $5.0 \times 10^{-110}$ | 23563607  | Obesity                               | FTO                   |

|          |           |            |                       |         |       |            |                       |          |                                                    |                                                 |
|----------|-----------|------------|-----------------------|---------|-------|------------|-----------------------|----------|----------------------------------------------------|-------------------------------------------------|
| 16q12.2  | 53803574  | rs1558902  | $1.1 \times 10^{-12}$ | 12701   | 0.927 | rs8050136  | $6.0 \times 10^{-6}$  | 23209189 | Type 2 diabetes                                    | FTO                                             |
| 16q12.2  | 53803574  | rs1558902  | $1.1 \times 10^{-12}$ | 12701   | 0.927 | rs8050136  | $3.0 \times 10^{-26}$ | 21706003 | Adiposity                                          | FTO                                             |
| 16q12.2  | 53803574  | rs1558902  | $1.1 \times 10^{-12}$ | 12701   | 0.927 | rs8050136  | $4.0 \times 10^{-8}$  | 21037115 | Body mass in chronic obstructive pulmonary disease | FTO                                             |
| 16q12.2  | 53803574  | rs1558902  | $1.1 \times 10^{-12}$ | 12701   | 0.927 | rs8050136  | $5.0 \times 10^{-36}$ | 19079260 | Weight                                             | FTO                                             |
| 16q12.2  | 53803574  | rs1558902  | $1.1 \times 10^{-12}$ | 12701   | 0.927 | rs8050136  | $1.0 \times 10^{-47}$ | 19079260 | Body mass index                                    | FTO                                             |
| 16q12.2  | 53803574  | rs1558902  | $1.1 \times 10^{-12}$ | 12701   | 0.927 | rs8050136  | $2.0 \times 10^{-17}$ | 19056611 | Type 2 diabetes                                    | FTO                                             |
| 16q12.2  | 53803574  | rs1558902  | $1.1 \times 10^{-12}$ | 12701   | 0.927 | rs8050136  | $7.0 \times 10^{-6}$  | 18372903 | Type 2 diabetes                                    | FTO                                             |
| 16q12.2  | 53803574  | rs1558902  | $1.1 \times 10^{-12}$ | 12701   | 0.927 | rs8050136  | $7.0 \times 10^{-14}$ | 17463249 | Type 2 diabetes                                    | FTO                                             |
| 16q12.2  | 53803574  | rs1558902  | $1.1 \times 10^{-12}$ | 12701   | 0.927 | rs8050136  | $1.0 \times 10^{-12}$ | 17463248 | Type 2 diabetes                                    | FTO                                             |
| 16q12.2  | 53803574  | rs1558902  | $1.1 \times 10^{-12}$ | 16319   | 0.927 | rs11075990 | $2.0 \times 10^{-51}$ | 23563607 | Body mass index                                    | FTO                                             |
| 16q12.2  | 53803574  | rs1558902  | $1.1 \times 10^{-12}$ | 16953   | 0.927 | rs9939609  | $1.0 \times 10^{-20}$ | 22693455 | Type 2 diabetes                                    | FTO                                             |
| 16q12.2  | 53803574  | rs1558902  | $1.1 \times 10^{-12}$ | 16953   | 0.927 | rs9939609  | $3.0 \times 10^{-8}$  | 21102462 | Menarche (age at onset)                            | FTO                                             |
| 16q12.2  | 53803574  | rs1558902  | $1.1 \times 10^{-12}$ | 16953   | 0.927 | rs9939609  | $2.0 \times 10^{-7}$  | 19396169 | Biomedical quantitative traits                     | FTO                                             |
| 16q12.2  | 53803574  | rs1558902  | $1.1 \times 10^{-12}$ | 16953   | 0.927 | rs9939609  | $4.0 \times 10^{-51}$ | 19079261 | Body mass index                                    | FTO                                             |
| 16q12.2  | 53803574  | rs1558902  | $1.1 \times 10^{-12}$ | 16953   | 0.927 | rs9939609  | $2.0 \times 10^{-7}$  | 17554300 | Type 2 diabetes                                    | FTO                                             |
| 16q12.2  | 53803574  | rs1558902  | $1.1 \times 10^{-12}$ | 16953   | 0.927 | rs9939609  | $2.0 \times 10^{-20}$ | 17434869 | Body mass index                                    | FTO                                             |
| 16q12.2  | 53803574  | rs1558902  | $1.1 \times 10^{-12}$ | 18041   | 0.932 | rs7202116  | $2.0 \times 10^{-10}$ | 22982992 | Body mass index                                    | FTO                                             |
| 16q12.2  | 53803574  | rs1558902  | $1.1 \times 10^{-12}$ | 21914   | 0.895 | rs9941349  | $6.0 \times 10^{-12}$ | 19553259 | Obesity (extreme)                                  | FTO                                             |
| 16q12.2  | 53803574  | rs1558902  | $1.1 \times 10^{-12}$ | 24492   | 0.927 | rs17817964 | $1.0 \times 10^{-10}$ | 23583978 | Body mass index                                    | FTO                                             |
| 16q12.2  | 53803574  | rs1558902  | $1.1 \times 10^{-12}$ | 26891   | 0.829 | rs9930506  | $9.0 \times 10^{-7}$  | 17658951 | Obesity-related traits                             | FTO                                             |
| 16q12.2  | 53803574  | rs1558902  | $1.1 \times 10^{-12}$ | 28197   | 0.834 | rs9922619  | $6.0 \times 10^{-8}$  | 22589738 | Subcutaneous adipose tissue                        | FTO                                             |
| 16q12.2  | 53803574  | rs1558902  | $1.1 \times 10^{-12}$ | 35561   | 0.551 | rs8044769  | $4.0 \times 10^{-6}$  | 22763110 | Osteoarthritis                                     | FTO                                             |
| 16q12.2  | 53803574  | rs1558902  | $1.1 \times 10^{-12}$ | 39334   | 0.828 | rs12149832 | $5.0 \times 10^{-22}$ | 22344221 | Body mass index                                    | FTO                                             |
| 16q12.2  | 53803574  | rs1558902  | $1.1 \times 10^{-12}$ | 41913   | 0.634 | rs11642841 | $3.0 \times 10^{-8}$  | 20581827 | Type 2 diabetes                                    | FTO                                             |
| 1p31.1   | 74977870  | rs1040070  | $1.7 \times 10^{-12}$ | 13532   | 0.851 | rs1514177  | $5.0 \times 10^{-9}$  | 23563607 | Obesity                                            | TNNI3K                                          |
| 1p31.1   | 74977870  | rs1040070  | $1.7 \times 10^{-12}$ | 13774   | 0.851 | rs1514175  | $3.0 \times 10^{-11}$ | 23669352 | Body mass index                                    | TNNI3K                                          |
| 1p31.1   | 74977870  | rs1040070  | $1.7 \times 10^{-12}$ | 13774   | 0.851 | rs1514175  | $8.0 \times 10^{-14}$ | 20935630 | Body mass index                                    | TNNI3K                                          |
| 1p31.1   | 74977870  | rs1040070  | $1.7 \times 10^{-12}$ | 15193   | 0.947 | rs1514174  | $6.0 \times 10^{-6}$  | 23449627 | Pubertal anthropometrics                           | TNNI3K                                          |
| 16p13.12 | 14388750  | rs1704528  | $6.4 \times 10^{-12}$ | -445    | 0.976 | rs1659127  | $4.0 \times 10^{-9}$  | 21102462 | Menarche (age at onset)                            | MKL2                                            |
| 16p13.12 | 14388750  | rs1704528  | $6.4 \times 10^{-12}$ | -445    | 0.976 | rs1659127  | $1.0 \times 10^{-11}$ | 20881960 | Height                                             | MKL2                                            |
| 1q25.2   | 177872905 | rs571567   | $4.6 \times 10^{-11}$ | -20325  | 0.937 | rs633715   | $7.0 \times 10^{-20}$ | 23563607 | Obesity                                            | SEC16B                                          |
| 1q25.2   | 177872905 | rs571567   | $4.6 \times 10^{-11}$ | -20325  | 0.937 | rs633715   | $5.0 \times 10^{-12}$ | 23563607 | Body mass index                                    | SEC16B                                          |
| 1q25.2   | 177872905 | rs571567   | $4.6 \times 10^{-11}$ | -20325  | 0.937 | rs633715   | $2.0 \times 10^{-8}$  | 21102462 | Menarche (age at onset)                            | SEC16B                                          |
| 1q25.2   | 177872905 | rs571567   | $4.6 \times 10^{-11}$ | -17388  | 0.975 | rs516636   | $3.0 \times 10^{-9}$  | 22344221 | Body mass index                                    | SEC16B                                          |
| 1q25.2   | 177872905 | rs571567   | $4.6 \times 10^{-11}$ | 16575   | 0.975 | rs543874   | $4.0 \times 10^{-11}$ | 23669352 | Body mass index                                    | SEC16B                                          |
| 1q25.2   | 177872905 | rs571567   | $4.6 \times 10^{-11}$ | 16575   | 0.975 | rs543874   | $2.0 \times 10^{-13}$ | 23583978 | Body mass index                                    | SEC16B                                          |
| 1q25.2   | 177872905 | rs571567   | $4.6 \times 10^{-11}$ | 16575   | 0.975 | rs543874   | $4.0 \times 10^{-23}$ | 20935630 | Body mass index                                    | SEC16B                                          |
| 1q25.2   | 177872905 | rs571567   | $4.6 \times 10^{-11}$ | 40614   | 0.820 | rs10913469 | $1.0 \times 10^{-8}$  | 19079260 | Weight                                             | SEC16B, RASAL2, SEC16B, RASAL2                  |
| 1q25.2   | 177872905 | rs571567   | $4.6 \times 10^{-11}$ | 40614   | 0.820 | rs10913469 | $6.0 \times 10^{-8}$  | 19079260 | Body mass index                                    | SEC16B, RASAL2                                  |
| 16q22.1  | 69735271  | rs6499244  | $8.7 \times 10^{-11}$ | -146699 | 0.879 | rs1364063  | $2.0 \times 10^{-8}$  | 21102462 | Menarche (age at onset)                            | NFAT5                                           |
| 17q21.33 | 49613785  | rs9635759  | $1.3 \times 10^{-10}$ | 0       | 1.000 | rs9635759  | $7.0 \times 10^{-13}$ | 21102462 | Menarche (age at onset)                            | CA10                                            |
| 6q22.32  | 126851160 | rs1490384  | $1.4 \times 10^{-10}$ | -152441 | 0.849 | rs9388489  | $4.0 \times 10^{-13}$ | 19430480 | Type 1 diabetes                                    | C6orf173                                        |
| 6q22.32  | 126851160 | rs1490384  | $1.4 \times 10^{-10}$ | -83560  | 0.862 | rs1361108  | $9.0 \times 10^{-6}$  | 21998595 | Height                                             | Intergenic C6orf173, TRMT11                     |
| 6q22.32  | 126851160 | rs1490384  | $1.4 \times 10^{-10}$ | -83560  | 0.862 | rs1361108  | $2.0 \times 10^{-8}$  | 21102462 | Menarche (age at onset)                            | Intergenic C6orf173, TRMT11                     |
| 6q22.32  | 126851160 | rs1490384  | $1.4 \times 10^{-10}$ | -15505  | 0.858 | rs1490388  | $6.0 \times 10^{-7}$  | 18391951 | Height                                             | C6orf173                                        |
| 6q22.32  | 126851160 | rs1490384  | $1.4 \times 10^{-10}$ | 0       | 1.000 | rs1490384  | $1.0 \times 10^{-16}$ | 23563607 | Height                                             | C6orf173                                        |
| 6q22.32  | 126851160 | rs1490384  | $1.4 \times 10^{-10}$ | 0       | 1.000 | rs1490384  | $4.0 \times 10^{-21}$ | 20881960 | Height                                             | C6orf173                                        |
| 6q22.32  | 126851160 | rs1490384  | $1.4 \times 10^{-10}$ | 115148  | 0.917 | rs4549631  | $5.0 \times 10^{-13}$ | 18391952 | Height                                             | LOC387103                                       |
| 7p14.1   | 41467946  | rs4141153  | $4.2 \times 10^{-10}$ | 2147    | 0.550 | rs1079866  | $6.0 \times 10^{-14}$ | 21102462 | Menarche (age at onset)                            | INHBA                                           |
| 11p14.1  | 27634373  | rs35051342 | $1.4 \times 10^{-9}$  | -70991  | 0.790 | rs988712   | $5.0 \times 10^{-17}$ | 21708048 | Obesity                                            | BDNF                                            |
| 11p14.1  | 27634373  | rs35051342 | $1.4 \times 10^{-9}$  | 45543   | 0.820 | rs6265     | $2.0 \times 10^{-8}$  | 20418890 | Smoking behavior                                   | BDNF                                            |
| 11p14.1  | 27634373  | rs35051342 | $1.4 \times 10^{-9}$  | 45543   | 0.820 | rs6265     | $2.0 \times 10^{-7}$  | 19079260 | Weight                                             | BDNF                                            |
| 11p14.1  | 27634373  | rs35051342 | $1.4 \times 10^{-9}$  | 45543   | 0.820 | rs6265     | $5.0 \times 10^{-10}$ | 19079260 | Body mass index                                    | BDNF                                            |
| 11p14.1  | 27634373  | rs35051342 | $1.4 \times 10^{-9}$  | 91613   | 0.879 | rs10767664 | $5.0 \times 10^{-26}$ | 20935630 | Body mass index                                    | BDNF                                            |
| 11p14.1  | 27634373  | rs35051342 | $1.4 \times 10^{-9}$  | 94166   | 0.885 | rs2030323  | $6.0 \times 10^{-11}$ | 23563607 | Obesity                                            | BDNF                                            |
| 11p14.1  | 27634373  | rs35051342 | $1.4 \times 10^{-9}$  | 94166   | 0.885 | rs2030323  | $6.0 \times 10^{-10}$ | 23563607 | Body mass index                                    | BDNF                                            |
| 11p14.1  | 27634373  | rs35051342 | $1.4 \times 10^{-9}$  | 94166   | 0.885 | rs2030323  | $4.0 \times 10^{-16}$ | 22344221 | Body mass index                                    | BDNF                                            |
| 12q13.12 | 50250111  | rs7306275  | $1.2 \times 10^{-8}$  | -2643   | 0.868 | rs7138803  | $1.0 \times 10^{-20}$ | 23563607 | Obesity                                            | LOC144233                                       |
| 12q13.12 | 50250111  | rs7306275  | $1.2 \times 10^{-8}$  | -2643   | 0.868 | rs7138803  | $2.0 \times 10^{-9}$  | 23563607 | Body mass index                                    | LOC144233                                       |
| 12q13.12 | 50250111  | rs7306275  | $1.2 \times 10^{-8}$  | -2643   | 0.868 | rs7138803  | $2.0 \times 10^{-17}$ | 20935630 | Body mass index                                    | FAIM2, FAIM2, BCDIN3D, BCDIN3D, FAIM2, BCDIN3D, |
| 12q13.12 | 50250111  | rs7306275  | $1.2 \times 10^{-8}$  | -2643   | 0.868 | rs7138803  | $8.0 \times 10^{-7}$  | 19557197 | Waist circumference                                | FAIM2, FAIM2, BCDIN3D, BCDIN3D, FAIM2, BCDIN3D, |
| 12q13.12 | 50250111  | rs7306275  | $1.2 \times 10^{-8}$  | -2643   | 0.868 | rs7138803  | $2.0 \times 10^{-7}$  | 19079260 | Weight                                             | FAIM2, BCDIN3D, FAIM2                           |
| 12q13.12 | 50250111  | rs7306275  | $1.2 \times 10^{-8}$  | -2643   | 0.868 | rs7138803  | $1.0 \times 10^{-7}$  | 19079260 | Body mass index                                    | FAIM2                                           |
| 3p12.1   | 86944938  | rs13068899 | $1.3 \times 10^{-8}$  | -94320  | 0.612 | rs7628864  | $3.0 \times 10^{-9}$  | 23449627 | Pubertal anthropometrics                           | VGLL3                                           |
| 3p12.1   | 86944938  | rs13068899 | $1.3 \times 10^{-8}$  | -94320  | 0.612 | rs7628864  | $3.0 \times 10^{-9}$  | 23449627 | Prostate cancer (gene x gene interaction)          | VGLL3                                           |
| 3p12.1   | 86944938  | rs13068899 | $1.3 \times 10^{-8}$  | -50460  | 0.724 | rs9757252  | $5.0 \times 10^{-6}$  | 22219177 | Prostate cancer (gene x gene interaction)          | VGLL3                                           |
| 3p12.1   | 86944938  | rs13068899 | $1.3 \times 10^{-8}$  | -28056  | 0.724 | rs7642134  | $4.0 \times 10^{-10}$ | 21102462 | Menarche (age at onset)                            | VGLL3                                           |
| 9q31.3   | 114309935 | rs10217747 | $2.0 \times 10^{-8}$  | -16301  | 0.946 | rs10980926 | $3.0 \times 10^{-6}$  | 23449627 | Pubertal anthropometrics                           | ZNF483                                          |
| 9q31.3   | 114309935 | rs10217747 | $2.0 \times 10^{-8}$  | -16301  | 0.946 | rs10980926 | $4.0 \times 10^{-11}$ | 21102462 | Menarche (age at onset)                            | ZNF483                                          |
| 9q31.3   | 114309935 | rs10217747 | $2.0 \times 10^{-8}$  | -8350   | 0.930 | rs10441737 | $4.0 \times 10^{-15}$ | 23599027 | Menarche (age at onset)                            | ZNF483                                          |

|         |          |            |                      |        |       |           |                       |          |                         |              |
|---------|----------|------------|----------------------|--------|-------|-----------|-----------------------|----------|-------------------------|--------------|
| 8q21.11 | 78116067 | rs10094574 | $2.6 \times 10^{-8}$ | -22230 | 0.757 | rs7821178 | $3.0 \times 10^{-9}$  | 21102462 | Menarche (age at onset) | PXMP3        |
| 8q21.11 | 78116067 | rs10094574 | $2.6 \times 10^{-8}$ | 44112  | 0.917 | rs7846385 | $5.0 \times 10^{-8}$  | 18391951 | Height                  | PXMP3, ZFHX4 |
| 8q21.11 | 78116067 | rs10094574 | $2.6 \times 10^{-8}$ | 62418  | 0.884 | rs6473015 | $7.0 \times 10^{-13}$ | 20881960 | Height                  | PEX2         |

## Replication of GWAS Catalog Results

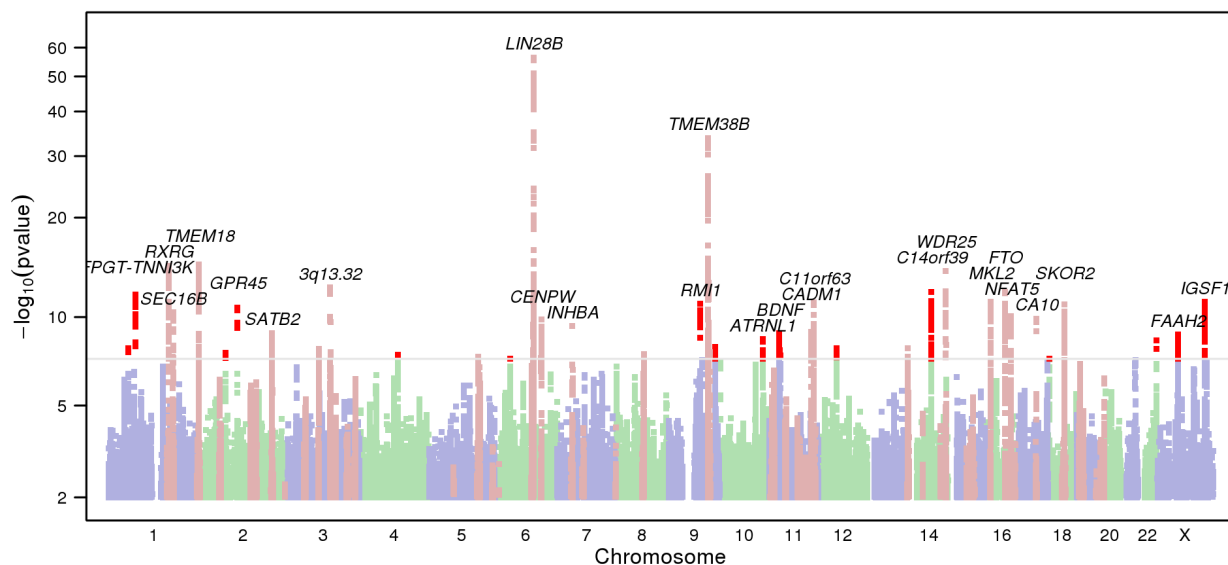

The following table shows, for each GWAS Catalog result for similar traits, our association test result for our best available proxy (distance < 100kb,  $r^2 > 0.8$ ).

| region  | position  | our.name   | our.pval              | dist | rsqr  | assay.name | pvalue                | pubmed.id | trait                   | genes                                                      |
|---------|-----------|------------|-----------------------|------|-------|------------|-----------------------|-----------|-------------------------|------------------------------------------------------------|
| 1q23.3  | 165394882 | rs466639   | $2.9 \times 10^{-13}$ | 0    | 1.000 | rs466639   | $1.0 \times 10^{-13}$ | 21102462  | Menarche (age at onset) | RXRG                                                       |
| 1q25.2  | 177852580 | rs633715   | $6.3 \times 10^{-11}$ | 0    | 1.000 | rs633715   | $2.0 \times 10^{-8}$  | 21102462  | Menarche (age at onset) | SEC16B                                                     |
| 1q44    | 243835186 | rs320320   | 0.0088                | 0    | 1.000 | rs320320   | $1.0 \times 10^{-7}$  | 23599027  | Menarche (age at onset) | AKT3                                                       |
| 2p25.3  | 614168    | rs2947411  | $5.2 \times 10^{-15}$ | 0    | 1.000 | rs2947411  | $2.0 \times 10^{-8}$  | 21102462  | Menarche (age at onset) | TMEM18                                                     |
| 2p16.1  | 56592083  | rs17268785 | $1.4 \times 10^{-5}$  | 0    | 1.000 | rs17268785 | $1.0 \times 10^{-10}$ | 21102462  | Menarche (age at onset) | CCDC85A                                                    |
| 2q22.2  | 142228509 | rs12472911 | 0.00039               | 0    | 1.000 | rs12472911 | $2.0 \times 10^{-7}$  | 21102462  | Menarche (age at onset) | LRP1B                                                      |
| 2q24.1  | 157096776 | rs17188434 | 0.00023               | 0    | 1.000 | rs17188434 | $1.0 \times 10^{-9}$  | 21102462  | Menarche (age at onset) | NR4A2                                                      |
| 2q33.1  | 199632565 | rs12617311 | $2.4 \times 10^{-6}$  | 0    | 1.000 | rs12617311 | $6.0 \times 10^{-13}$ | 21102462  | Menarche (age at onset) | PLCL1                                                      |
| 2q37.2  | 236539307 | rs6431393  | 0.74                  | 0    | 1.000 | rs6431393  | $4.0 \times 10^{-6}$  | 23667675  | Menarche (age at onset) | AGAP1                                                      |
| 3p21.31 | 49210732  | rs7617480  | 0.00040               | 0    | 1.000 | rs7617480  | $3.0 \times 10^{-8}$  | 21102462  | Menarche (age at onset) | KLHDC8B                                                    |
| 3p21.31 | 50093209  | rs6762477  | 0.00089               | 0    | 1.000 | rs6762477  | $2.0 \times 10^{-8}$  | 21102462  | Menarche (age at onset) | RBM6                                                       |
| 3p12.1  | 86916882  | rs7642134  | $3.6 \times 10^{-7}$  | 0    | 1.000 | rs7642134  | $4.0 \times 10^{-10}$ | 21102462  | Menarche (age at onset) | VGLL3                                                      |
| 3q13.32 | 117574822 | rs6438424  | $4.1 \times 10^{-13}$ | 0    | 1.000 | rs6438424  | $1.0 \times 10^{-13}$ | 21102462  | Menarche (age at onset) | Intergenic                                                 |
| 3q21.3  | 127895226 | rs2687729  | 0.00045               | 0    | 1.000 | rs2687729  | $1.0 \times 10^{-7}$  | 21102462  | Menarche (age at onset) | EEFSEC                                                     |
| 3q22.1  | 132610752 | rs6439371  | $3.7 \times 10^{-6}$  | 0    | 1.000 | rs6439371  | $1.0 \times 10^{-8}$  | 21102462  | Menarche (age at onset) | TMEM108, NPHP3                                             |
| 3q26.1  | 160820524 | rs4557202  | 0.78                  | 0    | 1.000 | rs4557202  | $2.0 \times 10^{-6}$  | 23599027  | Menarche (age at onset) | B3GALNT1                                                   |
| 3q27.1  | 184010048 | rs3914188  | 0.0049                | 0    | 1.000 | rs3914188  | $3.0 \times 10^{-7}$  | 21102462  | Menarche (age at onset) | ECE2                                                       |
| 3q27.2  | 185629568 | rs2002675  | $5.9 \times 10^{-7}$  | 0    | 1.000 | rs2002675  | $1.0 \times 10^{-9}$  | 21102462  | Menarche (age at onset) | TRA2B, ETV5                                                |
| 5q13.1  | 67194469  | rs10940138 | 0.24                  | 0    | 1.000 | rs10940138 | $4.0 \times 10^{-7}$  | 23599027  | Menarche (age at onset) | PIK3R1                                                     |
| 5q31.1  | 133849177 | rs13187289 | 0.00068               | 0    | 1.000 | rs13187289 | $2.0 \times 10^{-10}$ | 21102462  | Menarche (age at onset) | PHF15                                                      |
| 5q31.2  | 137707315 | rs757647   | 0.28                  | 0    | 1.000 | rs757647   | $5.0 \times 10^{-8}$  | 21102462  | Menarche (age at onset) | KDM3B                                                      |
| 6q16.2  | 100208438 | rs4840086  | 0.00011               | 0    | 1.000 | rs4840086  | $2.0 \times 10^{-8}$  | 21102462  | Menarche (age at onset) | PRDM13, MCHR2                                              |
| 6q16.3  | 105378954 | rs7759938  | $1.4 \times 10^{-56}$ | 0    | 1.000 | rs7759938  | $5.0 \times 10^{-60}$ | 21102462  | Menarche (age at onset) | LIN28B                                                     |
| 6q16.3  | 105378954 | rs7759938  | $1.4 \times 10^{-56}$ | 0    | 1.000 | rs7759938  | $7.0 \times 10^{-9}$  | 19448620  | Menarche (age at onset) | LIN28B                                                     |
| 6q16.3  | 105400837 | rs314280   | $2.1 \times 10^{-51}$ | 0    | 1.000 | rs314280   | $2.0 \times 10^{-14}$ | 19448622  | Menarche (age at onset) | LIN28B, HACE1, E3 ubiquitin protein ligase 1, BVES, POPDC3 |
| 6q16.3  | 105407999 | rs314276   | $1.2 \times 10^{-50}$ | 0    | 1.000 | rs314276   | $4.0 \times 10^{-16}$ | 19448623  | Menarche (age at onset) | LIN28B                                                     |
| 6q16.3  | 105443189 | rs364663   | $1.9 \times 10^{-45}$ | 0    | 1.000 | rs364663   | $5.0 \times 10^{-7}$  | 23667675  | Menarche (age at onset) | LIN28B                                                     |
| 6q22.32 | 126767600 | rs1361108  | $1.6 \times 10^{-9}$  | 0    | 1.000 | rs1361108  | $2.0 \times 10^{-8}$  | 21102462  | Menarche (age at onset) | C6orf173, TRMT11                                           |
| 7p14.1  | 41470093  | rs1079866  | $1.0 \times 10^{-7}$  | 0    | 1.000 | rs1079866  | $6.0 \times 10^{-14}$ | 21102462  | Menarche (age at onset) | INHBA                                                      |
| 7q11.22 | 67188788  | rs7807441  | 0.67                  | 0    | 1.000 | rs7807441  | $3.0 \times 10^{-6}$  | 23599027  | Menarche (age at onset) | FLJ13195                                                   |
| 8p23.3  | 1244224   | rs17669535 | 0.22                  | 0    | 1.000 | rs17669535 | $6.0 \times 10^{-7}$  | 23599027  | Menarche (age at onset) | DLGAP2                                                     |
| 8q21.11 | 77611625  | rs4735738  | $9.1 \times 10^{-7}$  | 0    | 1.000 | rs4735738  | $5.0 \times 10^{-6}$  | 23667675  | Menarche (age at onset) | ZFHX4                                                      |
| 8q21.11 | 78093837  | rs7821178  | $1.1 \times 10^{-6}$  | 0    | 1.000 | rs7821178  | $3.0 \times 10^{-9}$  | 21102462  | Menarche (age at onset) | PXMP3                                                      |
| 9q31.2  | 108967088 | rs2090409  | $5.0 \times 10^{-34}$ | 0    | 1.000 | rs2090409  | $2.0 \times 10^{-33}$ | 21102462  | Menarche (age at onset) | TMEM38B                                                    |
| 9q31.2  | 108967088 | rs2090409  | $5.0 \times 10^{-34}$ | 0    | 1.000 | rs2090409  | $2.0 \times 10^{-9}$  | 19448620  | Menarche (age at onset) | TMEM38B, SLC44A1, FKTN, FSD1L, TAL2, ZNF462                |
| 9q31.3  | 114293634 | rs10980926 | $2.6 \times 10^{-8}$  | 0    | 1.000 | rs10980926 | $4.0 \times 10^{-11}$ | 21102462  | Menarche (age at onset) | ZNF483                                                     |
| 9q31.3  | 114301585 | rs10441737 | $3.1 \times 10^{-8}$  | 0    | 1.000 | rs10441737 | $4.0 \times 10^{-15}$ | 23599027  | Menarche (age at onset) | ZNF483                                                     |
| 9q31.3  | 114303679 | rs7873730  | $2.5 \times 10^{-7}$  | 0    | 1.000 | rs7873730  | $2.0 \times 10^{-6}$  | 23599027  | Menarche (age at onset) | ZNF483                                                     |

|          |           |            |                       |   |       |            |                       |          |                                       |                   |
|----------|-----------|------------|-----------------------|---|-------|------------|-----------------------|----------|---------------------------------------|-------------------|
| 11p15.4  | 8639200   | rs4929923  | 6.3×10 <sup>-6</sup>  | 0 | 1.000 | rs4929923  | 1.0×10 <sup>-8</sup>  | 21102462 | Menarche (age at onset)               | TRIM66            |
| 11p15.2  | 13293905  | rs900145   | 9.7×10 <sup>-7</sup>  | 0 | 1.000 | rs900145   | 2.0×10 <sup>-8</sup>  | 21102462 | Menarche (age at onset)               | ARNTL             |
| 11p15.2  | 15457467  | rs7114467  | 0.090                 | 0 | 1.000 | rs7114467  | 9.0×10 <sup>-6</sup>  | 23667675 | Menarche (age at onset)               | INSC              |
| 11p11.2  | 46052575  | rs16938437 | 0.88                  | 0 | 1.000 | rs16938437 | 6.0×10 <sup>-8</sup>  | 21102462 | Menarche (age at onset)               | PHF21A            |
| 11q14.1  | 78095373  | rs10899489 | 0.00028               | 0 | 1.000 | rs10899489 | 8.0×10 <sup>-9</sup>  | 21102462 | Menarche (age at onset)               | GAB2              |
| 11q22.1  | 100406640 | rs12800752 | 0.19                  | 0 | 1.000 | rs12800752 | 3.0×10 <sup>-6</sup>  | 23667675 | Menarche (age at onset)               | ARHGAP42          |
| 11q23.3  | 117388932 | rs11216435 | 0.18                  | 0 | 1.000 | rs11216435 | 3.0×10 <sup>-6</sup>  | 23599027 | Menarche (age at onset)               | DSCAML1           |
| 11q24.1  | 122870683 | rs6589964  | 3.3×10 <sup>-7</sup>  | 0 | 1.000 | rs6589964  | 2.0×10 <sup>-12</sup> | 21102462 | Menarche (age at onset)               | BSX               |
| 11q24.2  | 126607580 | rs7114000  | 0.039                 | 0 | 1.000 | rs7114000  | 2.0×10 <sup>-6</sup>  | 23667675 | Menarche (age at onset)               | KIRREL3           |
| 13q34    | 112181437 | rs9555810  | 3.4×10 <sup>-6</sup>  | 0 | 1.000 | rs9555810  | 6.0×10 <sup>-8</sup>  | 21102462 | Menarche (age at onset)               | C13orf16, ARHGEF7 |
| 14q13.3  | 36989419  | rs2076751  | 0.083                 | 0 | 1.000 | rs2076751  | 7.0×10 <sup>-6</sup>  | 23667675 | Menarche (age at onset)               | NKX2-1            |
| 14q31.3  | 85963856  | rs8014131  | 0.46                  | 0 | 1.000 | rs8014131  | 3.0×10 <sup>-7</sup>  | 23599027 | Menarche (age at onset)               | FLRT2             |
| 14q32.2  | 101032217 | rs6575793  | 0.0022                | 0 | 1.000 | rs6575793  | 1.0×10 <sup>-8</sup>  | 21102462 | Menarche (age at onset)               | BEGAIN            |
| 15q21.2  | 51545454  | rs12907866 | 0.15                  | 0 | 1.000 | rs12907866 | 4.0×10 <sup>-7</sup>  | 23599027 | Menarche (age at onset)               | CYP19A1           |
| 15q21.3  | 54380200  | rs11071033 | 0.0045                | 0 | 1.000 | rs11071033 | 3.0×10 <sup>-6</sup>  | 23599027 | Menarche (age at onset)               | UNC13C            |
| 15q22.2  | 60781513  | rs3743266  | 0.00011               | 0 | 1.000 | rs3743266  | 8.0×10 <sup>-7</sup>  | 21102462 | Menarche (age at onset)               | RORA              |
| 15q22.2  | 60900963  | rs980000   | 0.45                  | 0 | 1.000 | rs980000   | 2.0×10 <sup>-6</sup>  | 23599027 | Menarche (age at onset)               | RORA              |
| 15q22.2  | 60937402  | rs339978   | 0.22                  | 0 | 1.000 | rs339978   | 2.0×10 <sup>-6</sup>  | 23599027 | Menarche (age at onset)               | RORA              |
| 15q23    | 67702907  | rs7359257  | 0.20                  | 0 | 1.000 | rs7359257  | 2.0×10 <sup>-6</sup>  | 21102462 | Menarche (age at onset)               | IQCH              |
| 16p13.12 | 14388305  | rs1659127  | 1.4×10 <sup>-11</sup> | 0 | 1.000 | rs1659127  | 4.0×10 <sup>-9</sup>  | 21102462 | Menarche (age at onset)               | MKL2              |
| 16q12.2  | 53820527  | rs9939609  | 1.5×10 <sup>-11</sup> | 0 | 1.000 | rs9939609  | 3.0×10 <sup>-8</sup>  | 21102462 | Menarche (age at onset)               | FTO               |
| 16q22.1  | 69588572  | rs1364063  | 5.4×10 <sup>-10</sup> | 0 | 1.000 | rs1364063  | 2.0×10 <sup>-8</sup>  | 21102462 | Menarche (age at onset)               | IFAT5             |
| 16q23.2  | 81473649  | rs310008   | 0.48                  | 0 | 1.000 | rs310008   | 4.0×10 <sup>-6</sup>  | 23667675 | Menarche (age at onset)               | CMIP              |
| 17q21.33 | 49613785  | rs9635759  | 1.3×10 <sup>-10</sup> | 0 | 1.000 | rs9635759  | 7.0×10 <sup>-13</sup> | 21102462 | Menarche (age at onset)               | CA10              |
| 18q12.3  | 42956672  | rs2243803  | 0.14                  | 0 | 1.000 | rs2243803  | 3.0×10 <sup>-7</sup>  | 21102462 | Menarche (age at onset)               | SLC14A2           |
| 18q21.1  | 44752238  | rs1398217  | 1.7×10 <sup>-9</sup>  | 0 | 1.000 | rs1398217  | 2.0×10 <sup>-13</sup> | 21102462 | Menarche (age at onset)               | FUSSEL18          |
| 19p13.2  | 10000322  | rs1862471  | 1.1×10 <sup>-6</sup>  | 0 | 1.000 | rs1862471  | 2.0×10 <sup>-7</sup>  | 21102462 | Menarche (age at onset)               | OLFM2             |
| 19p13.11 | 18817903  | rs10423674 | 0.0013                | 0 | 1.000 | rs10423674 | 6.0×10 <sup>-9</sup>  | 21102462 | Menarche (age at onset)               | CRTC1             |
| 20p12.1  | 17122593  | rs852069   | 1.3×10 <sup>-5</sup>  | 0 | 1.000 | rs852069   | 3.0×10 <sup>-8</sup>  | 21102462 | Menarche (age at onset)               | PCSK2             |
| 5q35.2   | 176378574 | rs365132   | 0.22                  | 0 | 1.000 | rs365132   | 8.0×10 <sup>-14</sup> | 19448621 | Menarche and menopause (age at onset) | UIMC1             |
| 6p24.2   | 10897488  | rs2153157  | 0.066                 | 0 | 1.000 | rs2153157  | 5.0×10 <sup>-8</sup>  | 19448621 | Menarche and menopause (age at onset) | GCM2, SYCP2L      |
| 6q16.3   | 105407662 | rs314277   | 1.1×10 <sup>-22</sup> | 0 | 1.000 | rs314277   | 3.0×10 <sup>-13</sup> | 19448621 | Menarche and menopause (age at onset) | LIN28B            |
| 9q31.2   | 108936674 | rs7861820  | 8.5×10 <sup>-14</sup> | 0 | 1.000 | rs7861820  | 3.0×10 <sup>-9</sup>  | 19448621 | Menarche and menopause (age at onset) | Intergenic        |
| 19q13.42 | 55819845  | rs1172822  | 0.55                  | 0 | 1.000 | rs1172822  | 2.0×10 <sup>-19</sup> | 19448621 | Menarche and menopause (age at onset) | BRSK1             |
| 20p12.3  | 5948227   | rs16991615 | 0.23                  | 0 | 1.000 | rs16991615 | 1.0×10 <sup>-21</sup> | 19448621 | Menarche and menopause (age at onset) | TRMT6, MCM8       |

## Nearby Nonsynonymous SNPs

| region  | position  | our.name   | our.pval              | dist    | rsqr  | assay.name  | gene     | aa.chg |
|---------|-----------|------------|-----------------------|---------|-------|-------------|----------|--------|
| 14q32.2 | 100846991 | rs12894936 | 1.4×10 <sup>-14</sup> | 716     | 0.733 | rs2273800   | WDR25    | H149R  |
| 18q21.1 | 44799515  | rs2048523  | 1.1×10 <sup>-11</sup> | -26133  | 0.542 | rs9956387   | SKOR2    | C725S  |
| 16q22.1 | 69735271  | rs6499244  | 8.7×10 <sup>-11</sup> | 47584   | 0.507 | rs3811348   | NOB1     | R231Q  |
| 11p14.1 | 27634373  | rs35051342 | 1.4×10 <sup>-9</sup>  | 45543   | 0.820 | rs6265      | BDNF     | V148M  |
| 9q33.3  | 127373463 | rs4072705  | 9.7×10 <sup>-9</sup>  | -142572 | 0.588 | rs10760365  | GPR144   | V750M  |
| 9q33.3  | 127373463 | rs4072705  | 9.7×10 <sup>-9</sup>  | -141689 | 0.581 | rs1570580   | GPR144   | R836G  |
| 9q33.3  | 127373463 | rs4072705  | 9.7×10 <sup>-9</sup>  | 192915  | 0.520 | rs7874348   | OLFML2A  | T309A  |
| 2p13.1  | 73739848  | rs35273932 | 2.1×10 <sup>-8</sup>  | 59784   | 0.712 | rs45501594  | ALMS1    | T3542S |
| 6p21.1  | 41893323  | rs9349203  | 4.7×10 <sup>-8</sup>  | -138753 | 0.680 | rs200179087 | PRICKLE4 | ?286?  |
| 6p21.1  | 41893323  | rs9349203  | 4.7×10 <sup>-8</sup>  | -138753 | 0.680 | rs200179087 | TOMM6    | ?-287? |
| 6p21.1  | 41893323  | rs9349203  | 4.7×10 <sup>-8</sup>  | -138750 | 0.675 | rs140326303 | PRICKLE4 | A287L  |
| 6p21.1  | 41893323  | rs9349203  | 4.7×10 <sup>-8</sup>  | -138750 | 0.675 | rs140326303 | TOMM6    | ?-286? |
| 6p21.1  | 41893323  | rs9349203  | 4.7×10 <sup>-8</sup>  | 10459   | 0.814 | rs1051130   | CCND3    | S259A  |

## Nearby Expression QTLs

| region  | position  | our.name   | our.pval              | dist  | rsqr  | assay.name | eqtl.dist | eqtl.gene | eqtl.pval            | eqtl.rsqr | tissue     | pubmed.id |
|---------|-----------|------------|-----------------------|-------|-------|------------|-----------|-----------|----------------------|-----------|------------|-----------|
| 14q32.2 | 100846991 | rs12894936 | 1.4×10 <sup>-14</sup> | 5829  | 0.703 | rs11624049 | -1216754  | BCL11B    | 2.1×10 <sup>-5</sup> | 0.063     | B-Cell     | 22446964  |
| 14q23.1 | 60890422  | rs1254309  | 1.1×10 <sup>-12</sup> | 13335 | 0.671 | rs1254319  | 191287    | PPM1A     | 0.00016              | 0.179     | T-cell     | 19644074  |
| 14q23.1 | 60890422  | rs1254309  | 1.1×10 <sup>-12</sup> | 13335 | 0.671 | rs1254319  | 841063    | RTN1      | 0.00011              | 0.186     | Fibroblast | 19644074  |
| 11q24.1 | 122819119 | rs7113019  | 7.1×10 <sup>-12</sup> | 28718 | 0.609 | rs6589963  | 999566    | OR10S1    | 0.00013              | 0.183     | T-cell     | 19644074  |
| 3p12.1  | 86944938  | rs13068899 | 1.3×10 <sup>-8</sup>  | 23554 | 0.649 | rs13074417 | 18631     | VGLL3     | 0.00044              | 0.157     | Fibroblast | 19644074  |
| 9q31.3  | 114309935 | rs10217747 | 2.0×10 <sup>-8</sup>  | -8350 | 0.930 | rs10441737 | -211383   | OR2K2     | 0.00015              | 0.050     | B-Cell     | 22446964  |



## Nearby Clinical Variants

| source  | region  | our.name   | our.pval             | dist  | rsqr  | assay.name | gene | phenotype                          | accession                          |
|---------|---------|------------|----------------------|-------|-------|------------|------|------------------------------------|------------------------------------|
| clinvar | 11p14.1 | rs35051342 | $1.4 \times 10^{-9}$ | 45543 | 0.820 | rs6265     | BDNF | Bulimia nervosa 2                  | NCBI curation                      |
| clinvar | 11p14.1 | rs35051342 | $1.4 \times 10^{-9}$ | 45543 | 0.820 | rs6265     | BDNF | Obsessive-compulsive disorder      | Human Phenotype OntologyHP:0000722 |
| clinvar | 11p14.1 | rs35051342 | $1.4 \times 10^{-9}$ | 45543 | 0.820 | rs6265     | BDNF | Bulimia nervosa 1                  | NCBI curation                      |
| clinvar | 11p14.1 | rs35051342 | $1.4 \times 10^{-9}$ | 45543 | 0.820 | rs6265     | BDNF | Congenital central hypoventilation | SNOMED CT399040002                 |

## Regional Association Plots

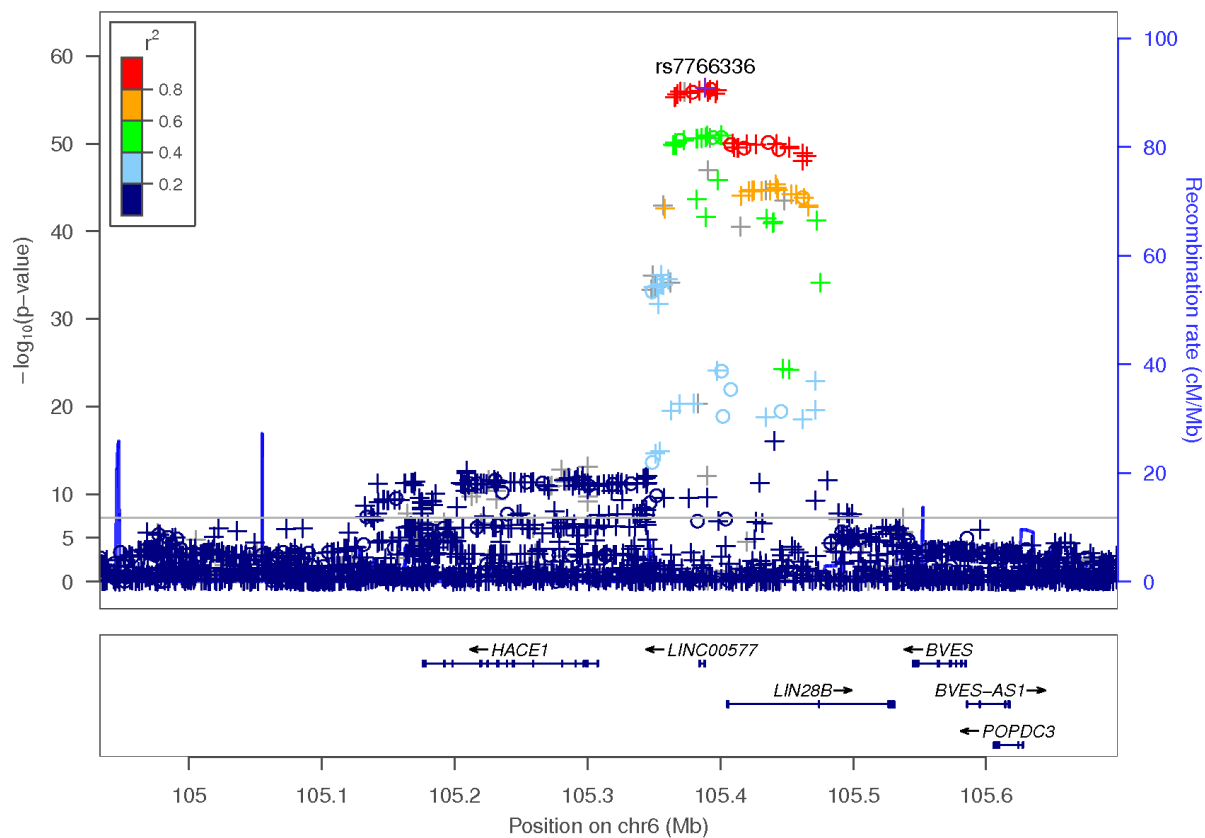

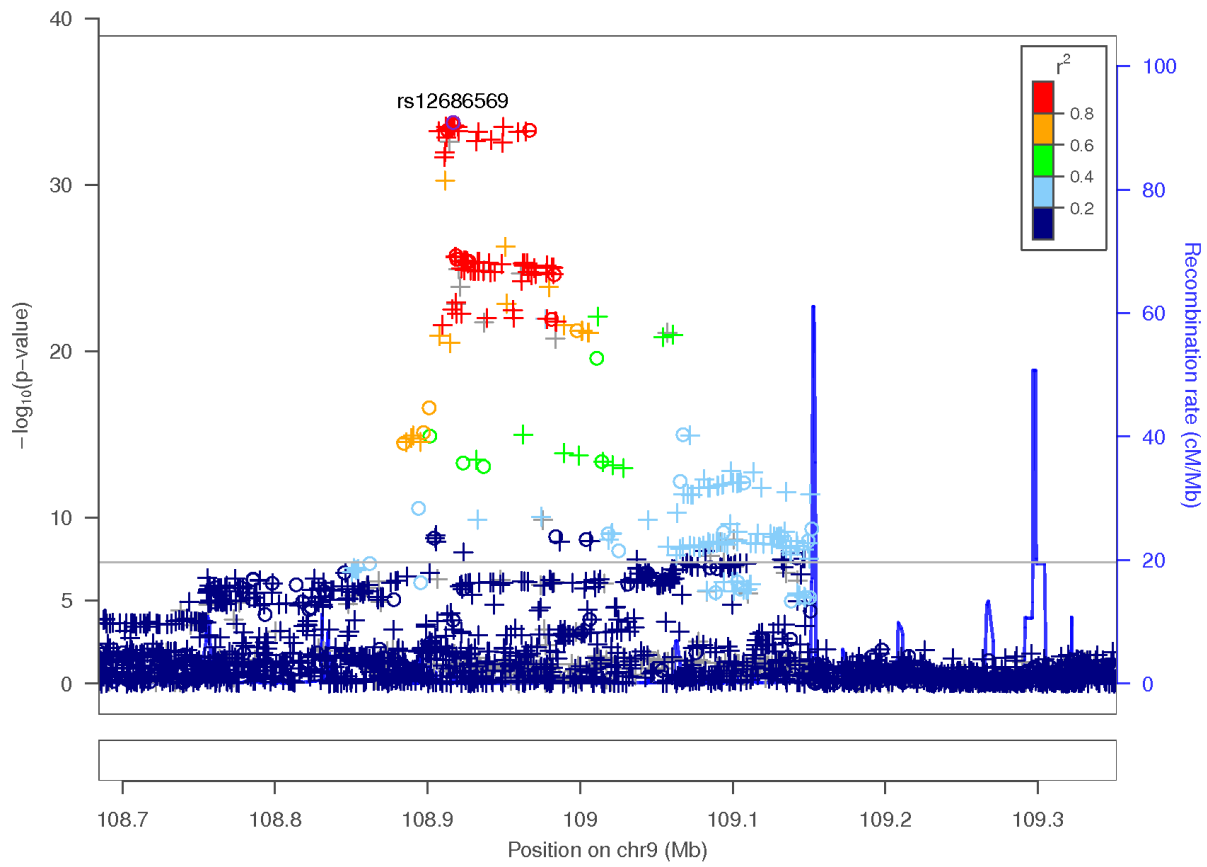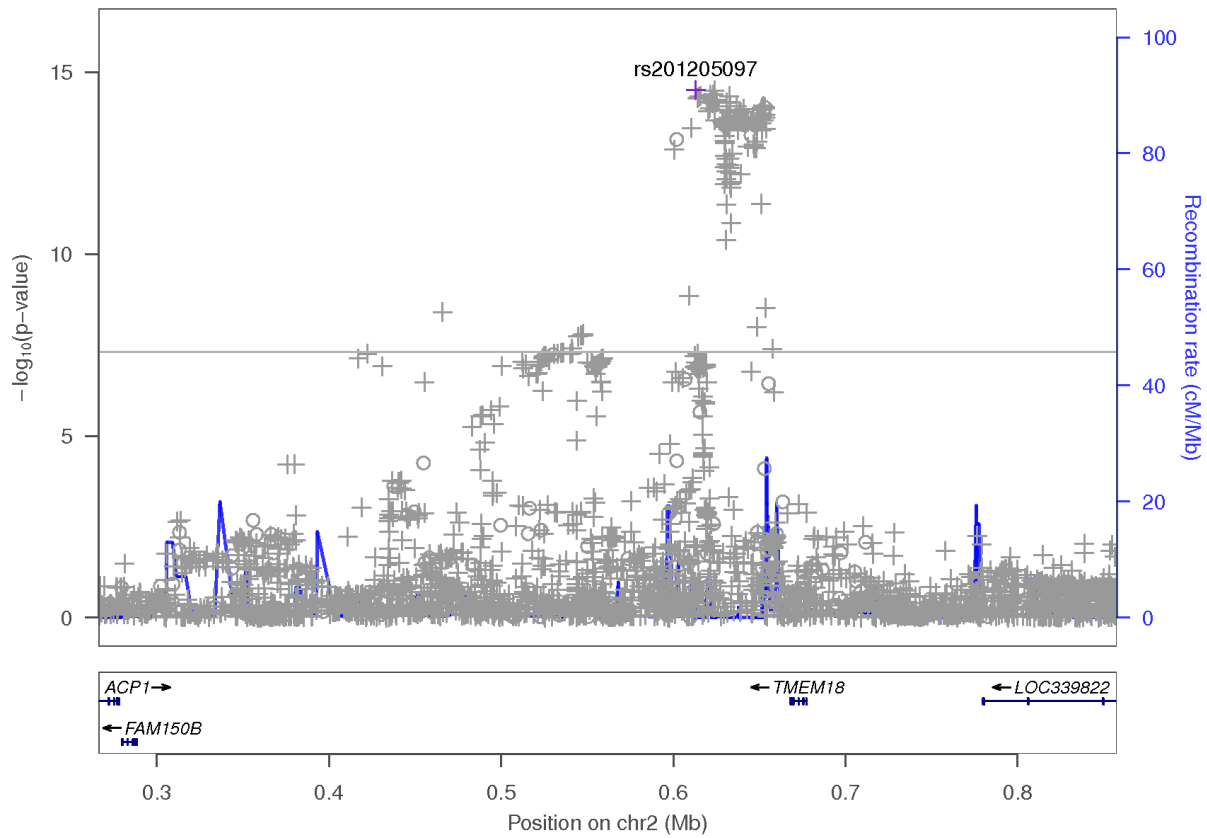

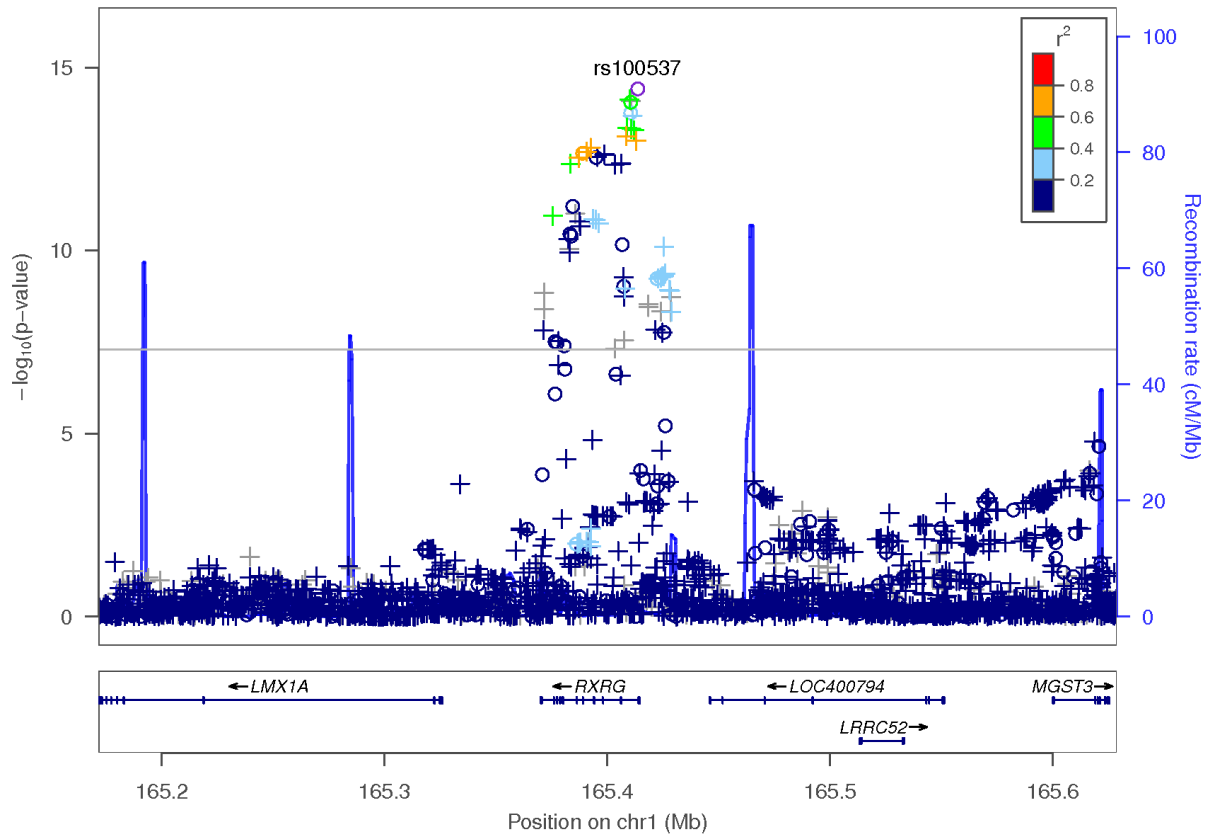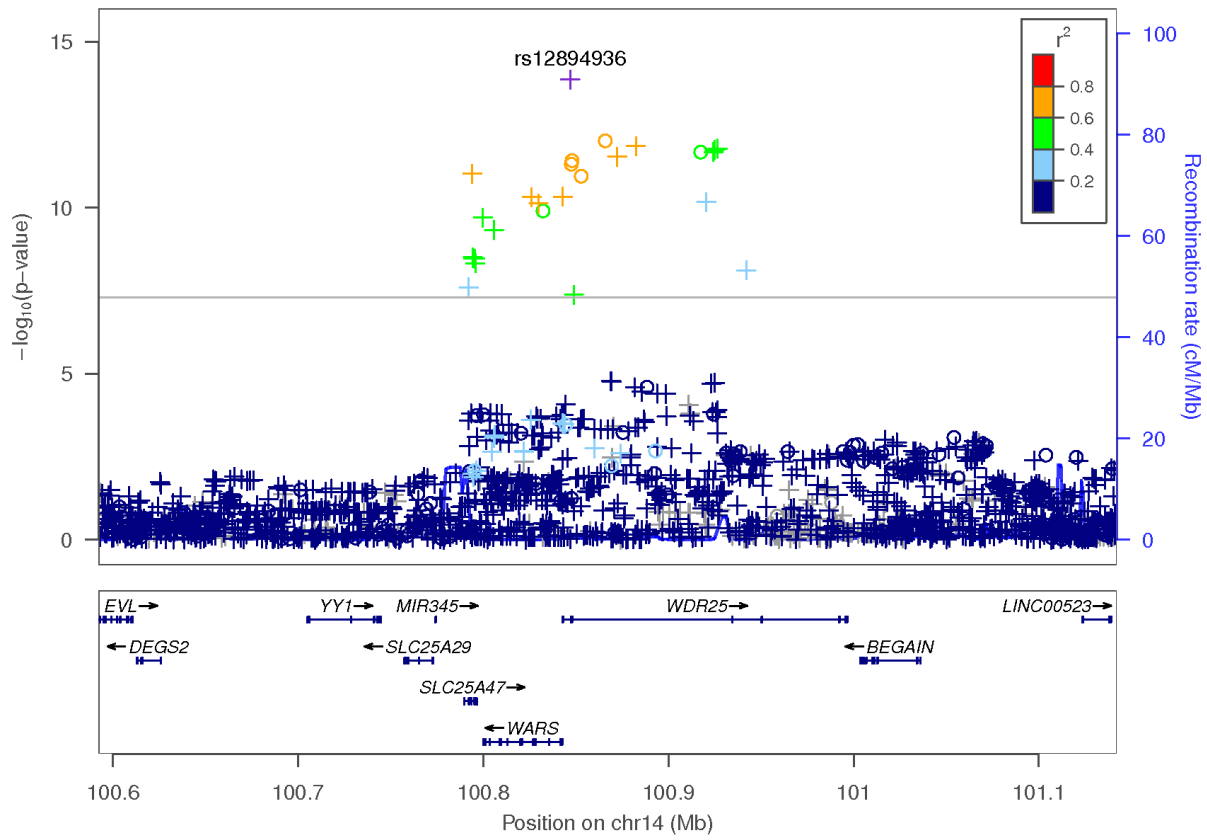

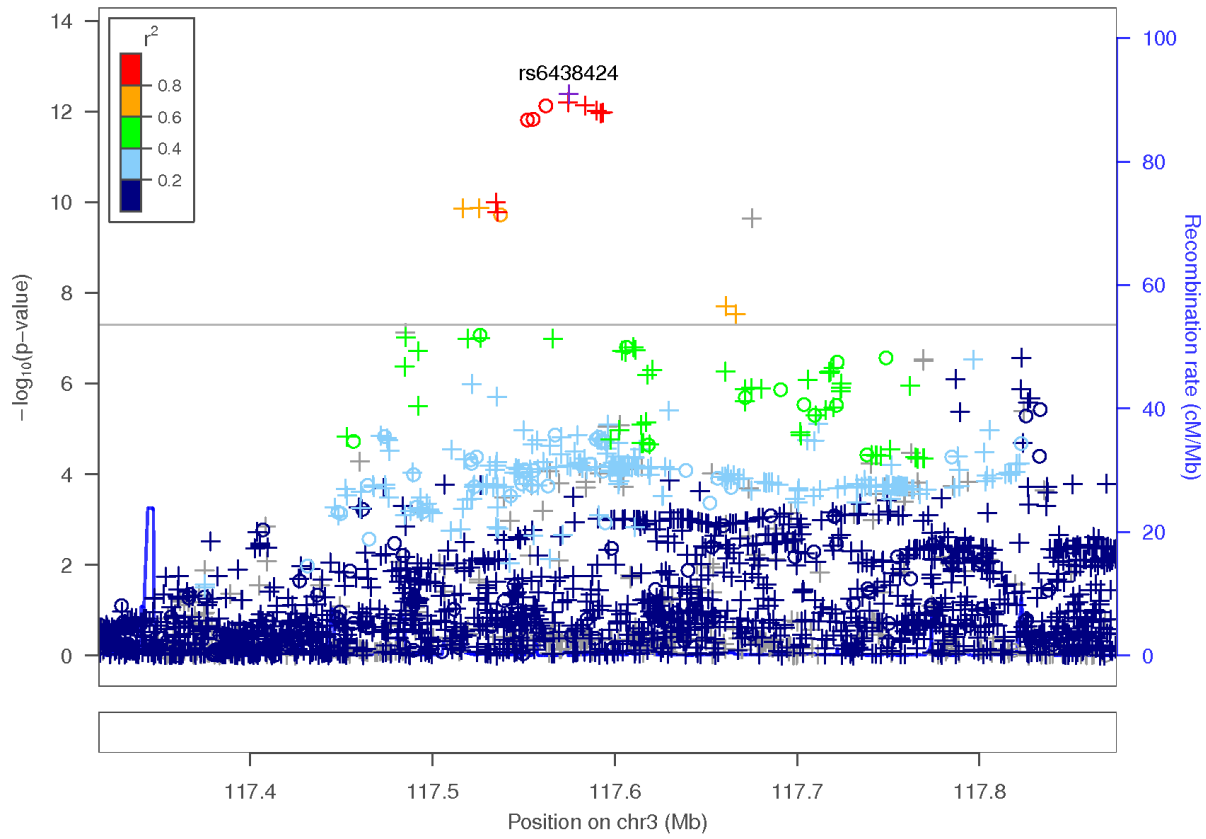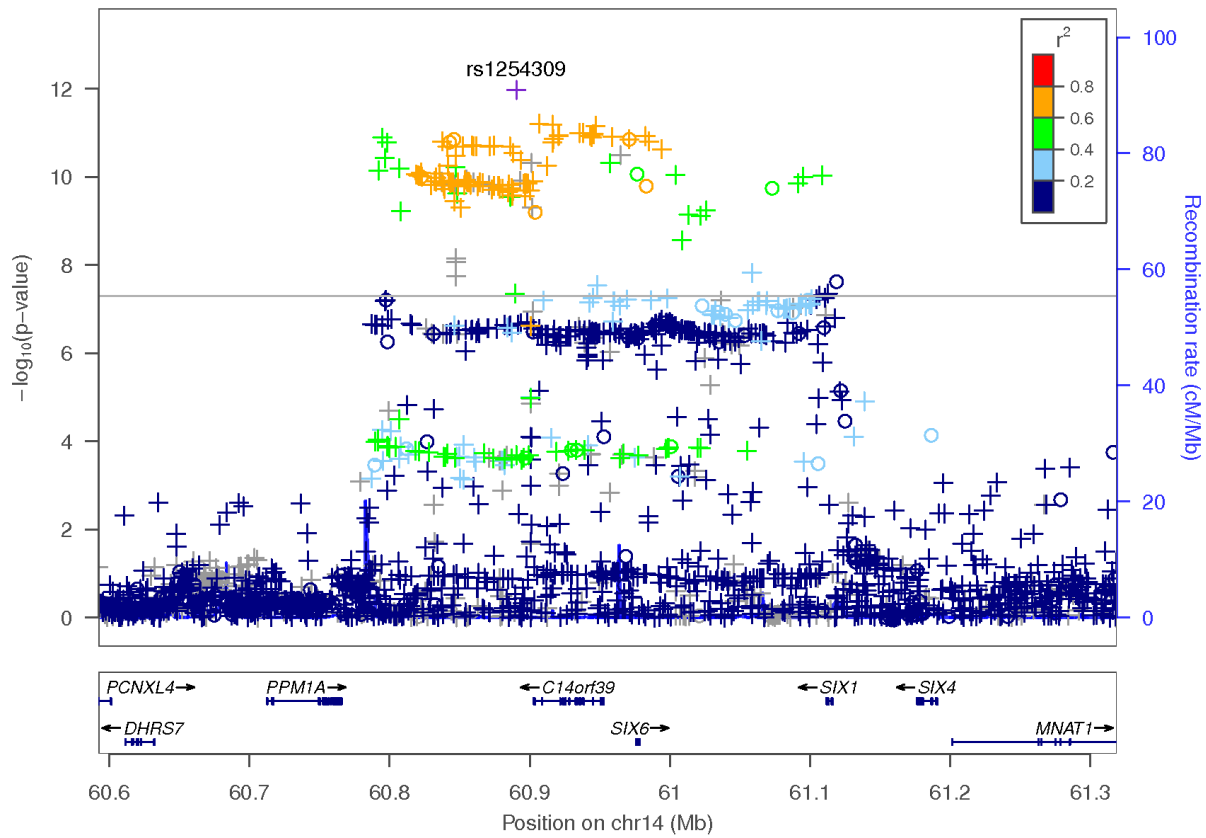

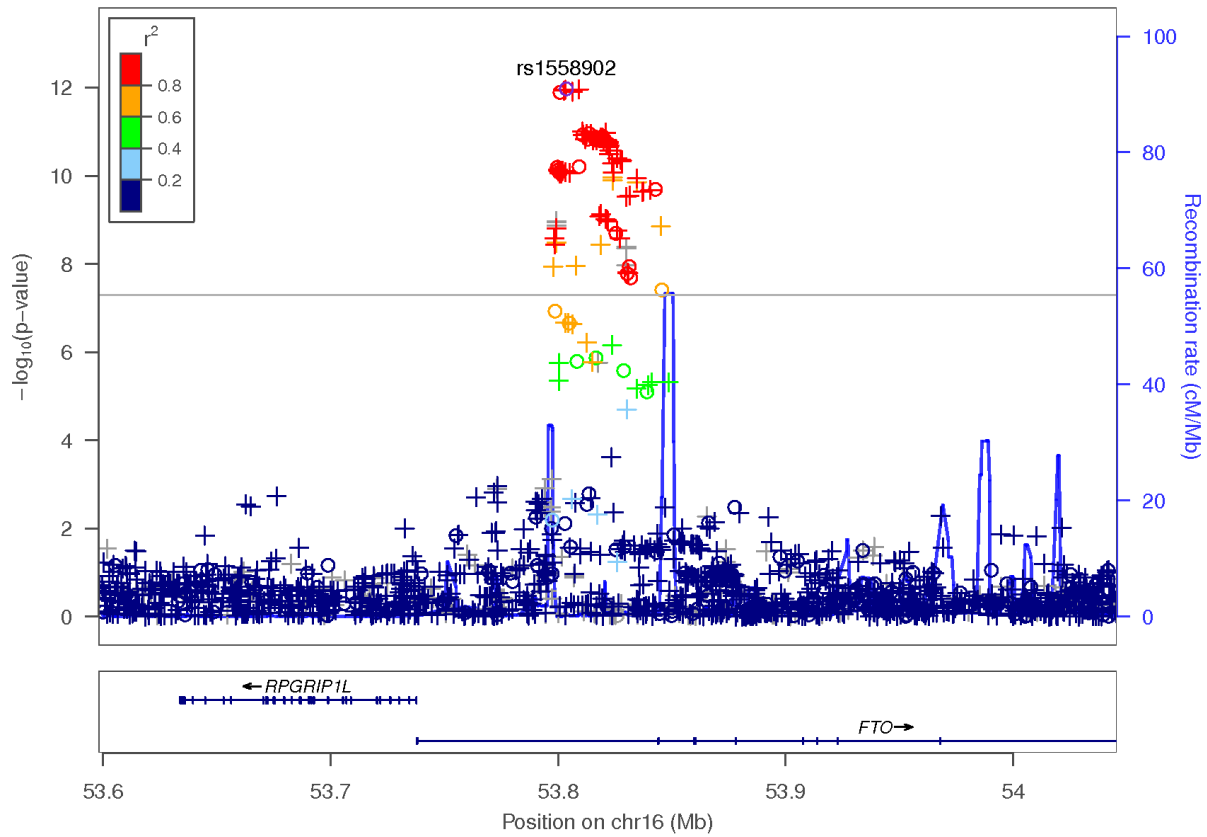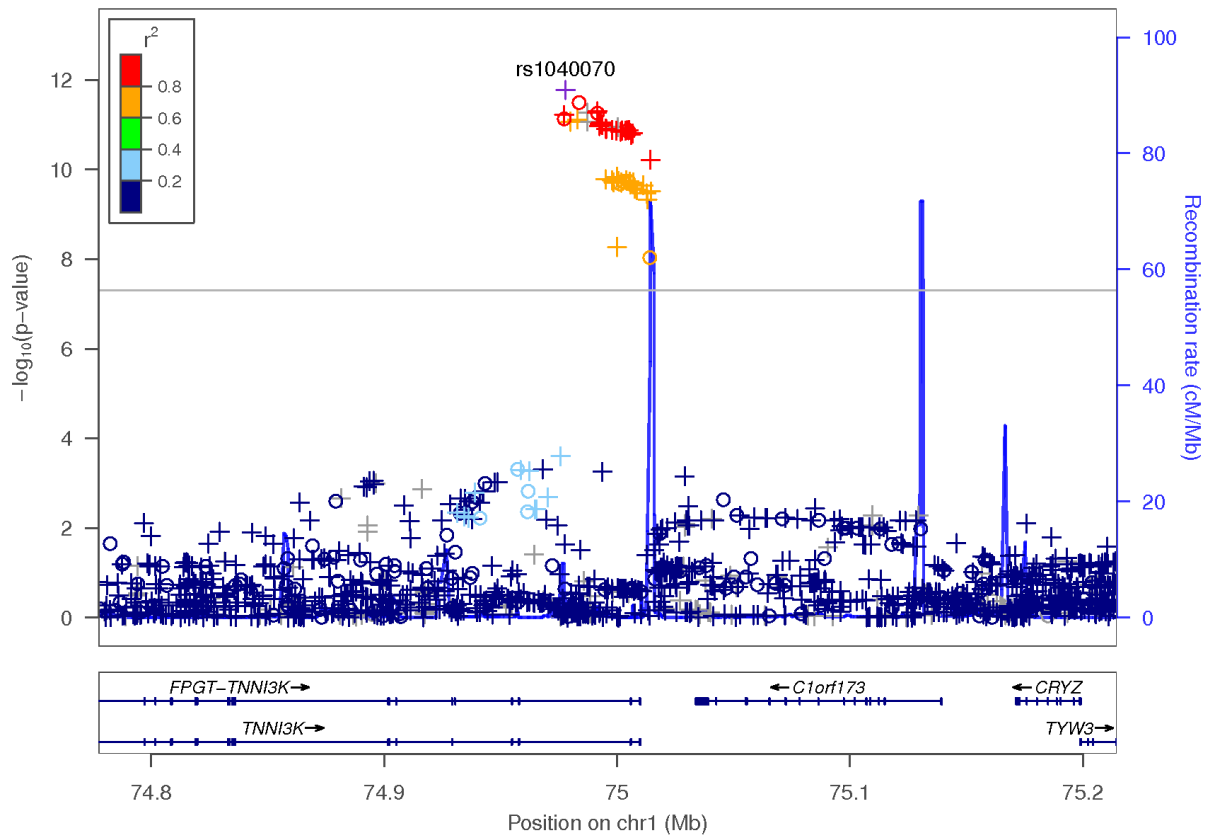

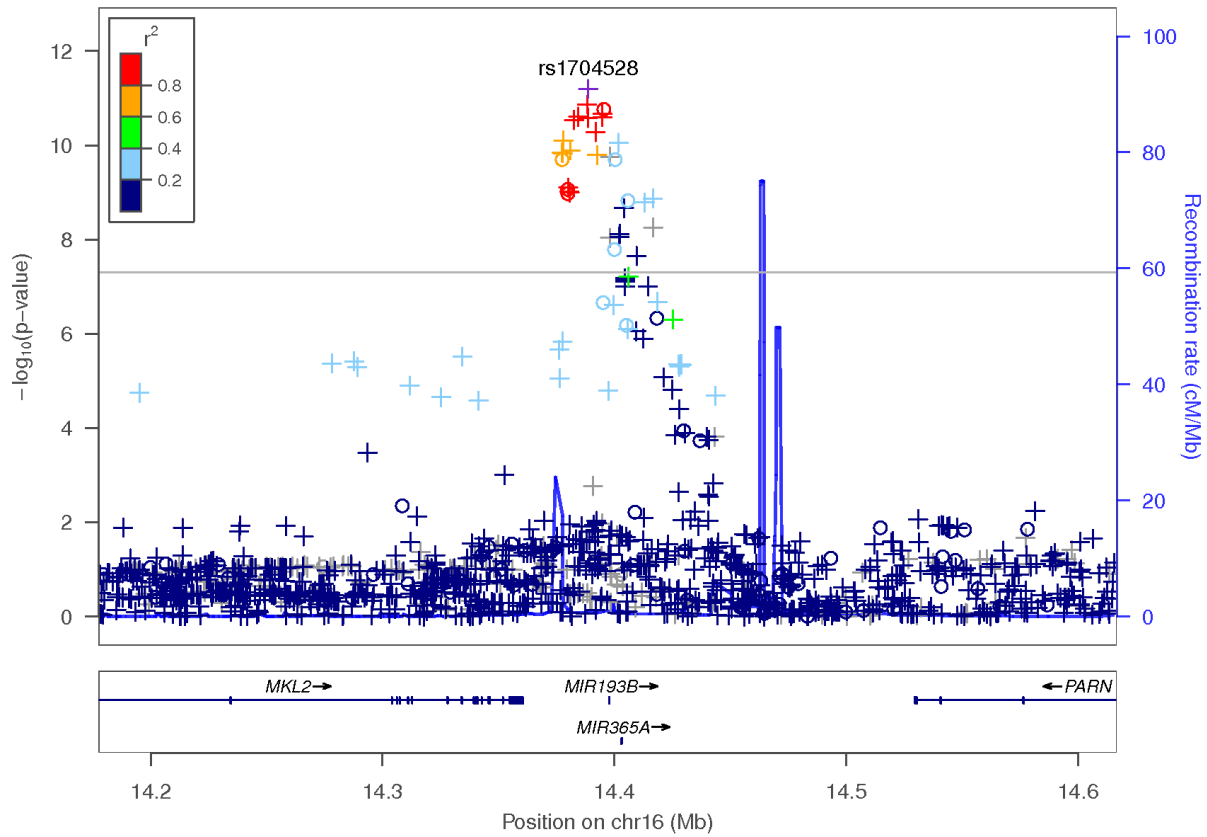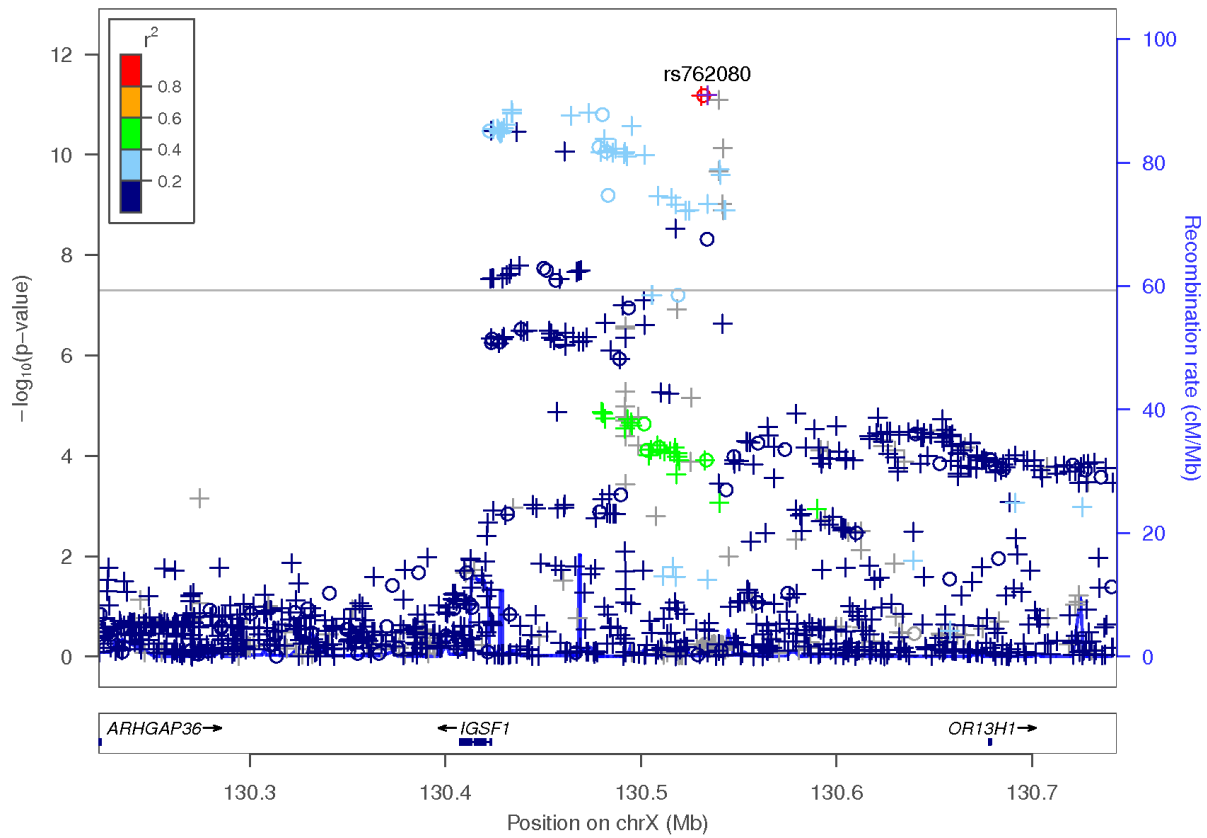

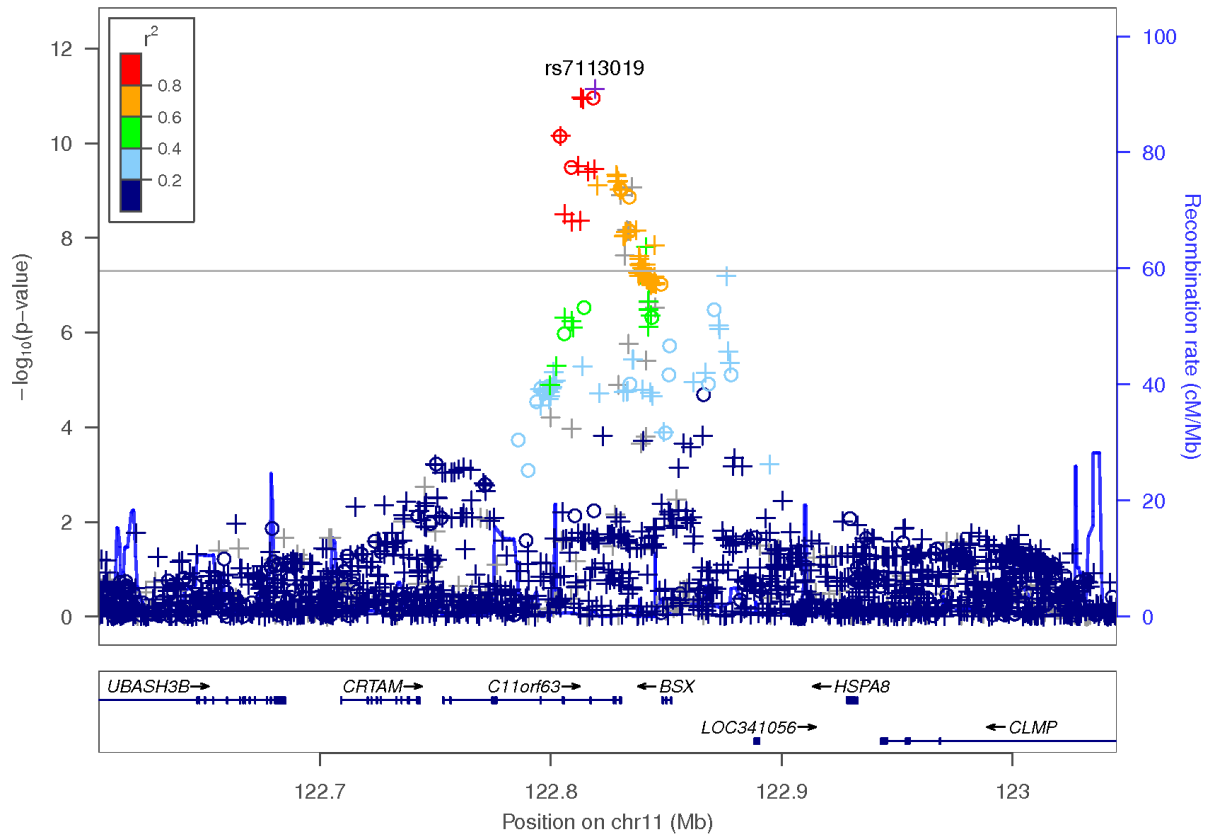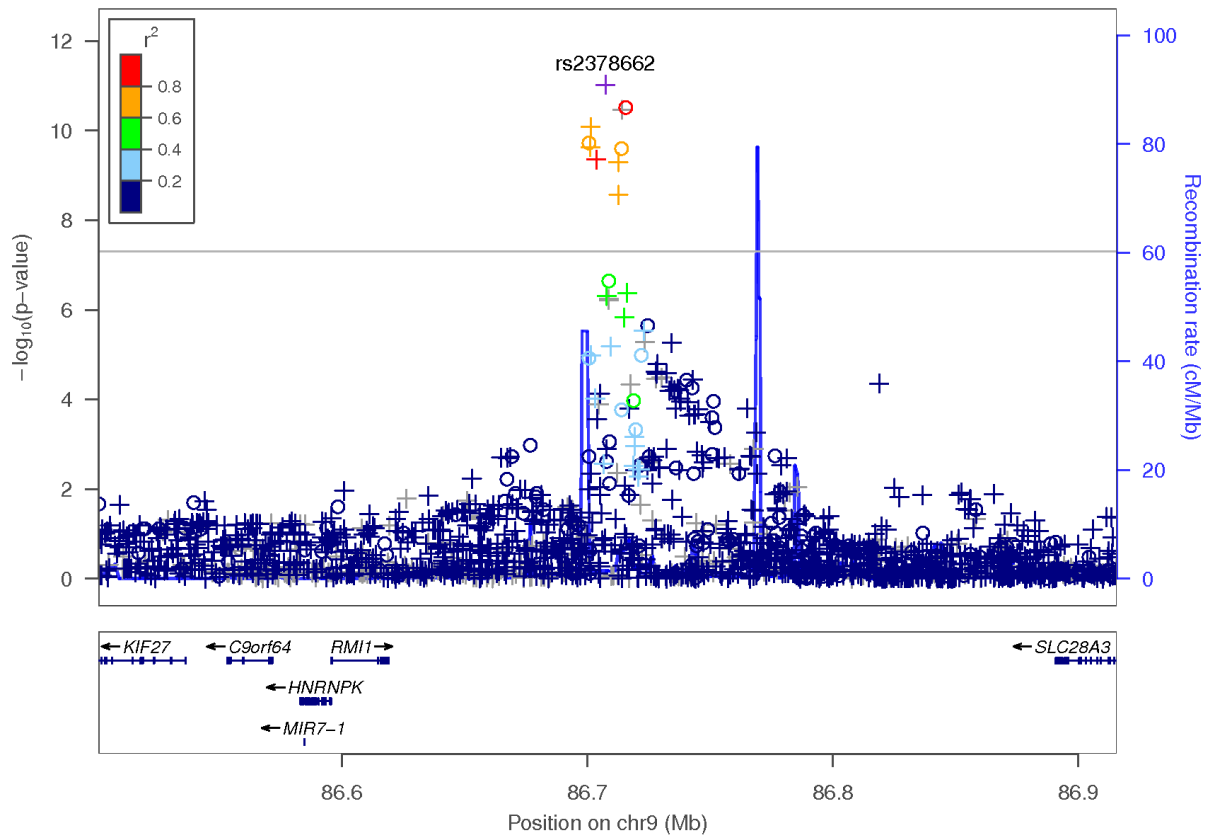

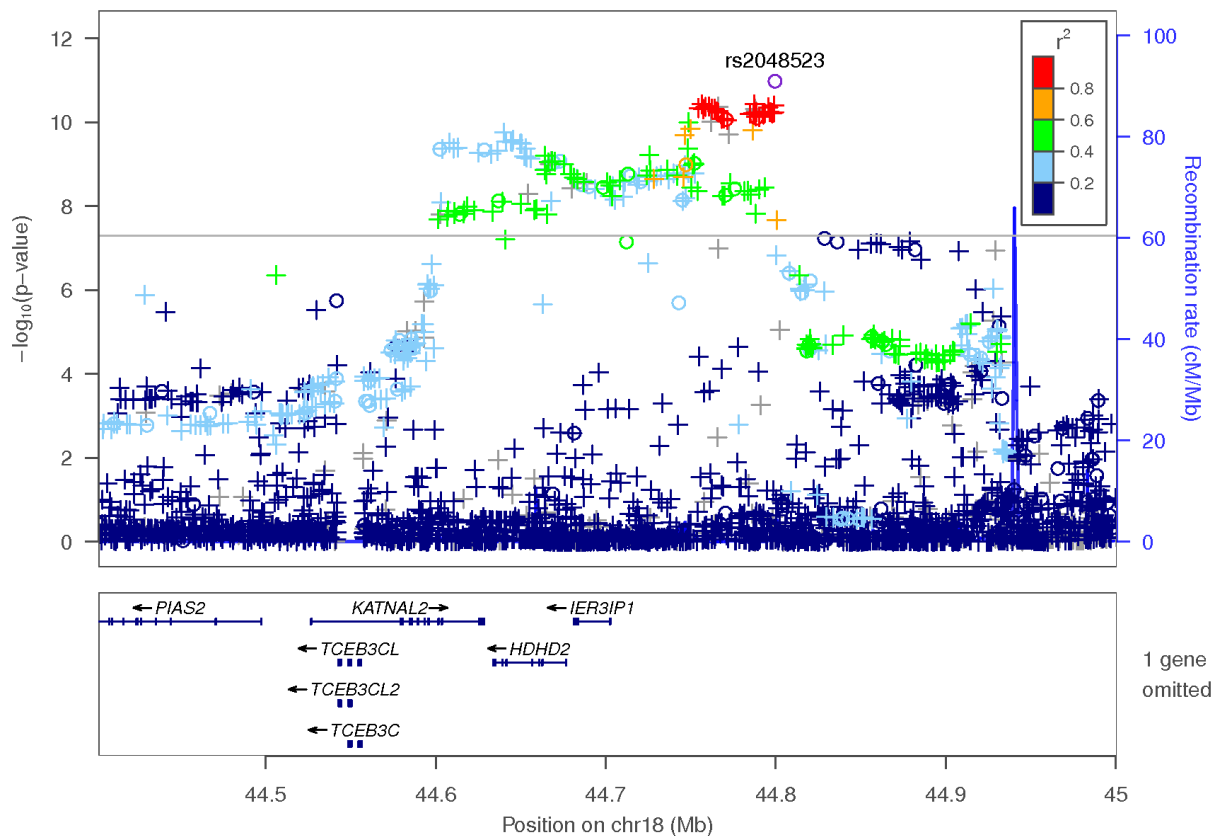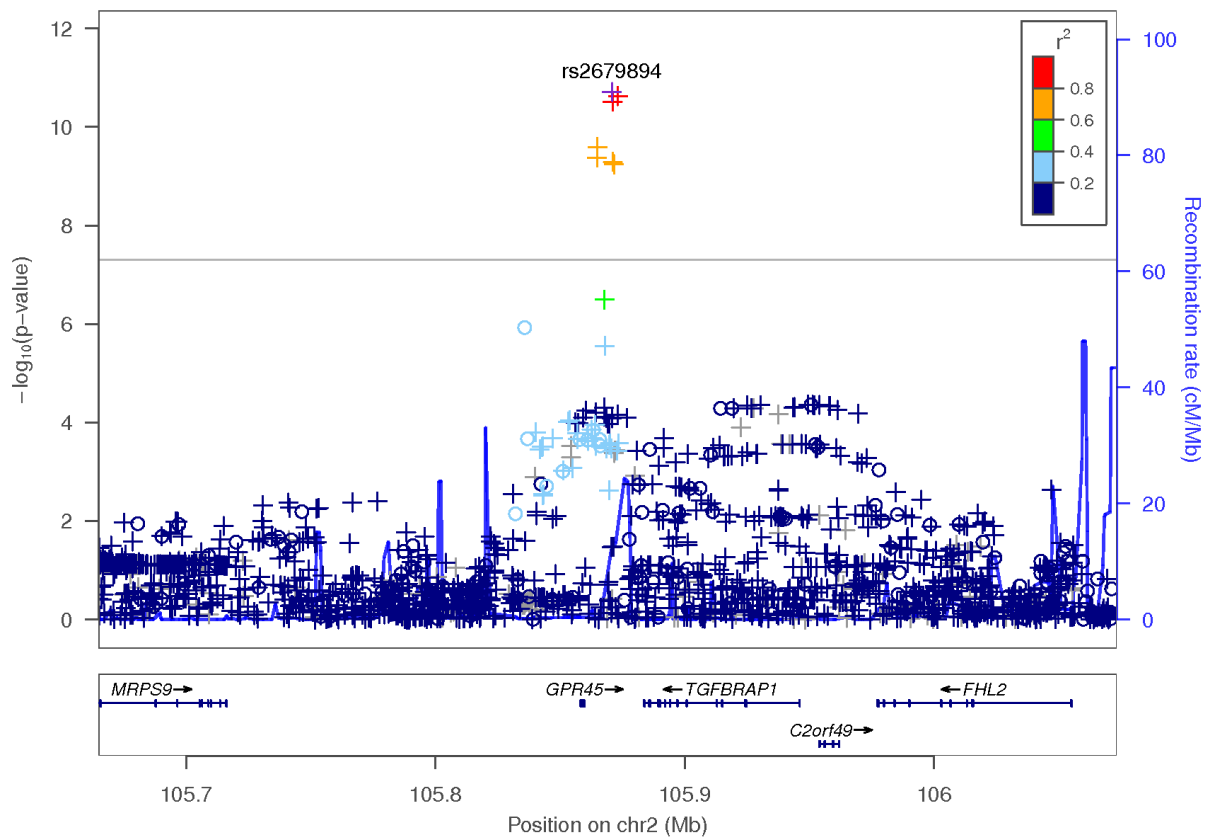



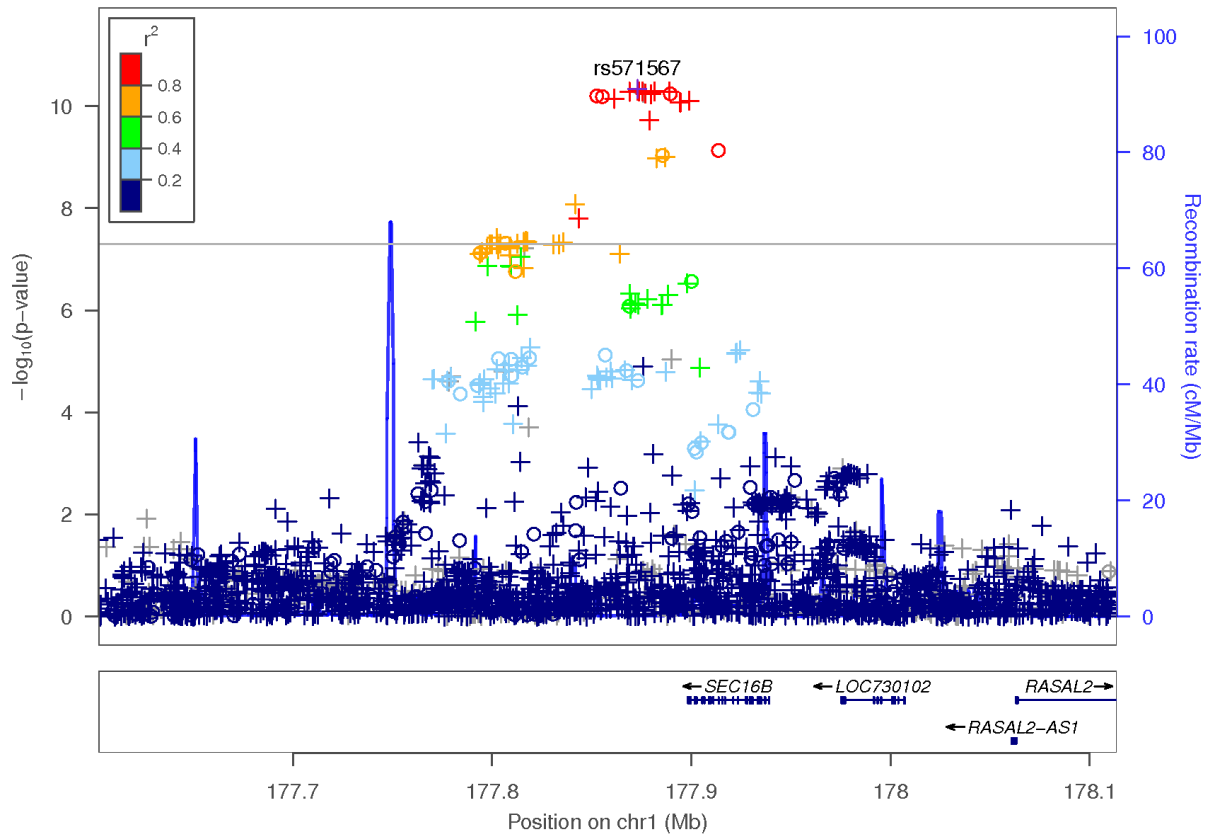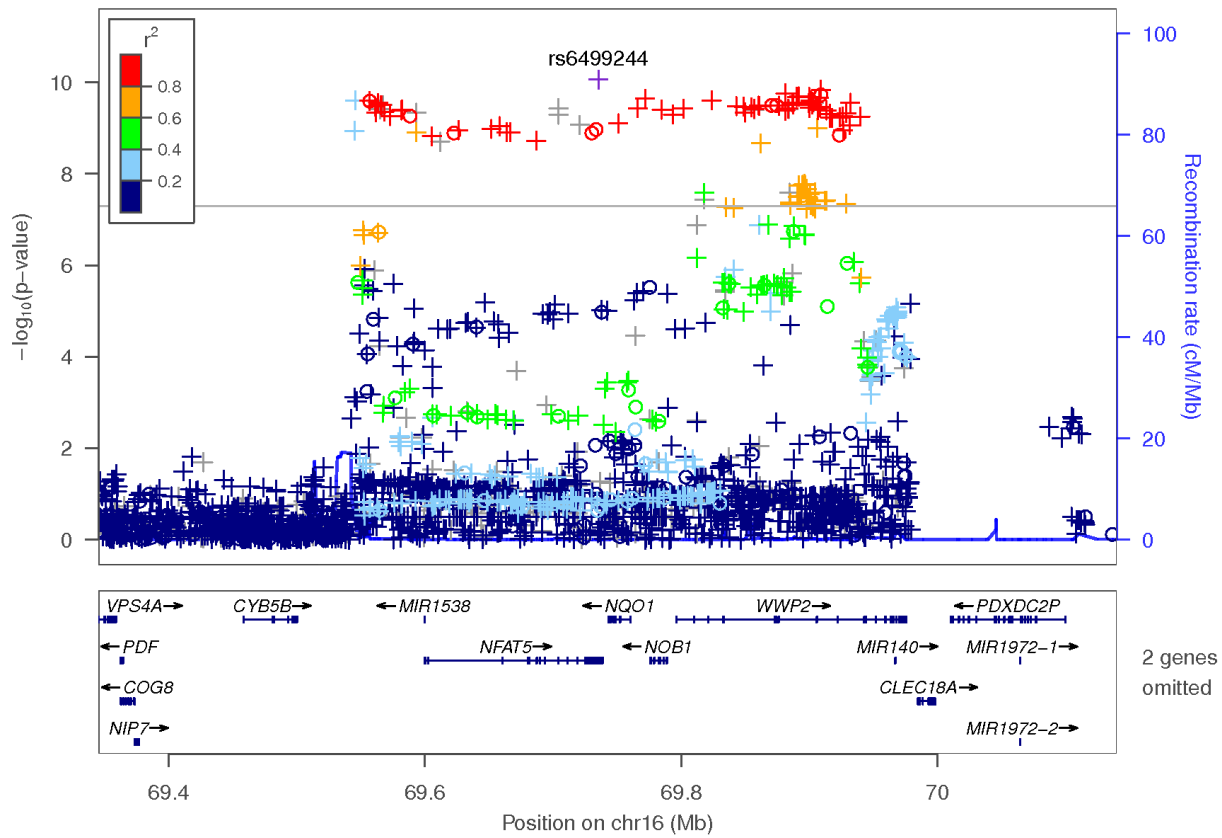

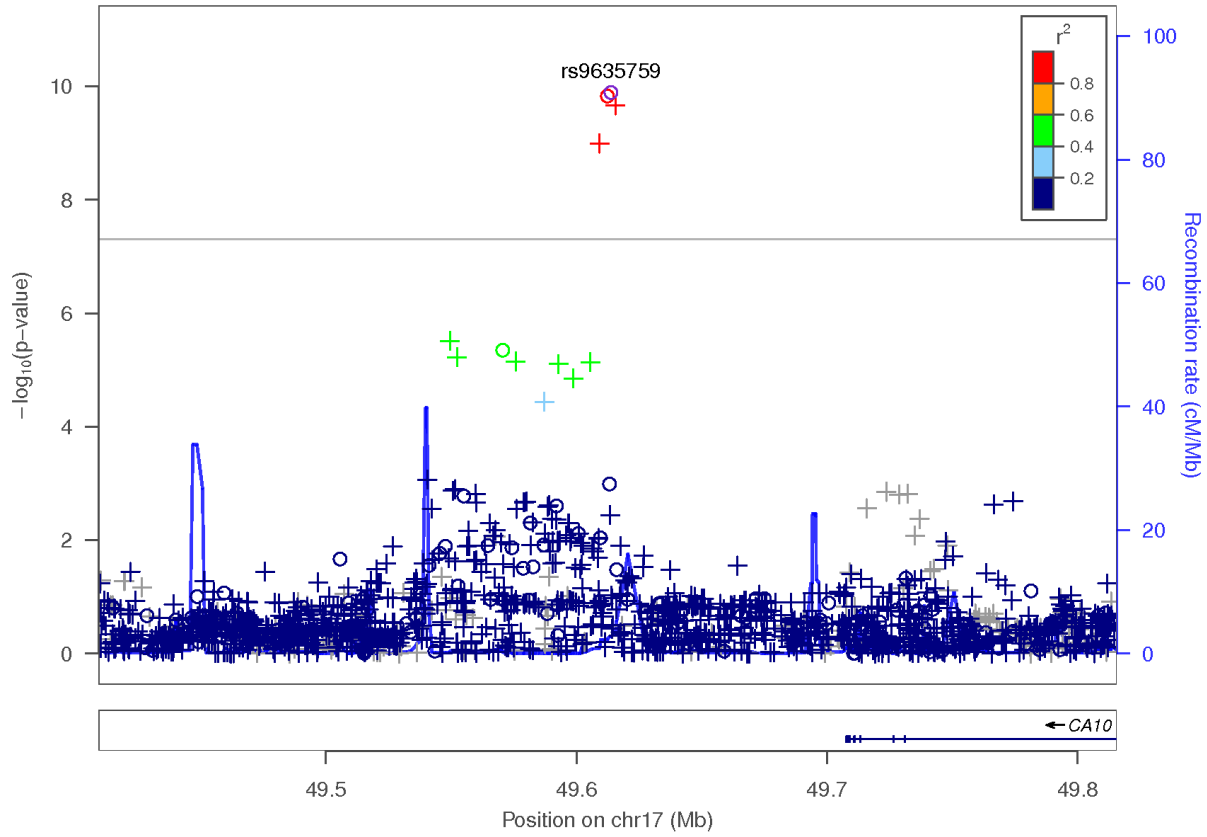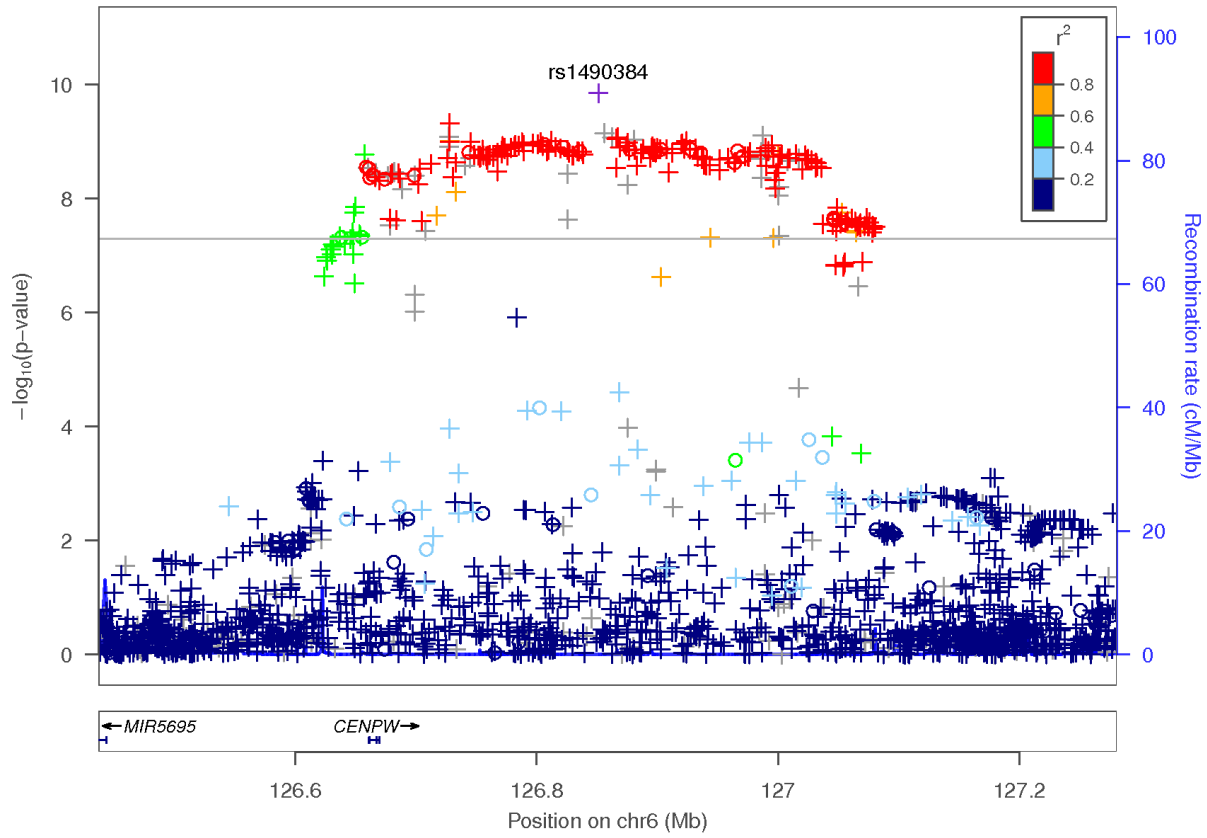

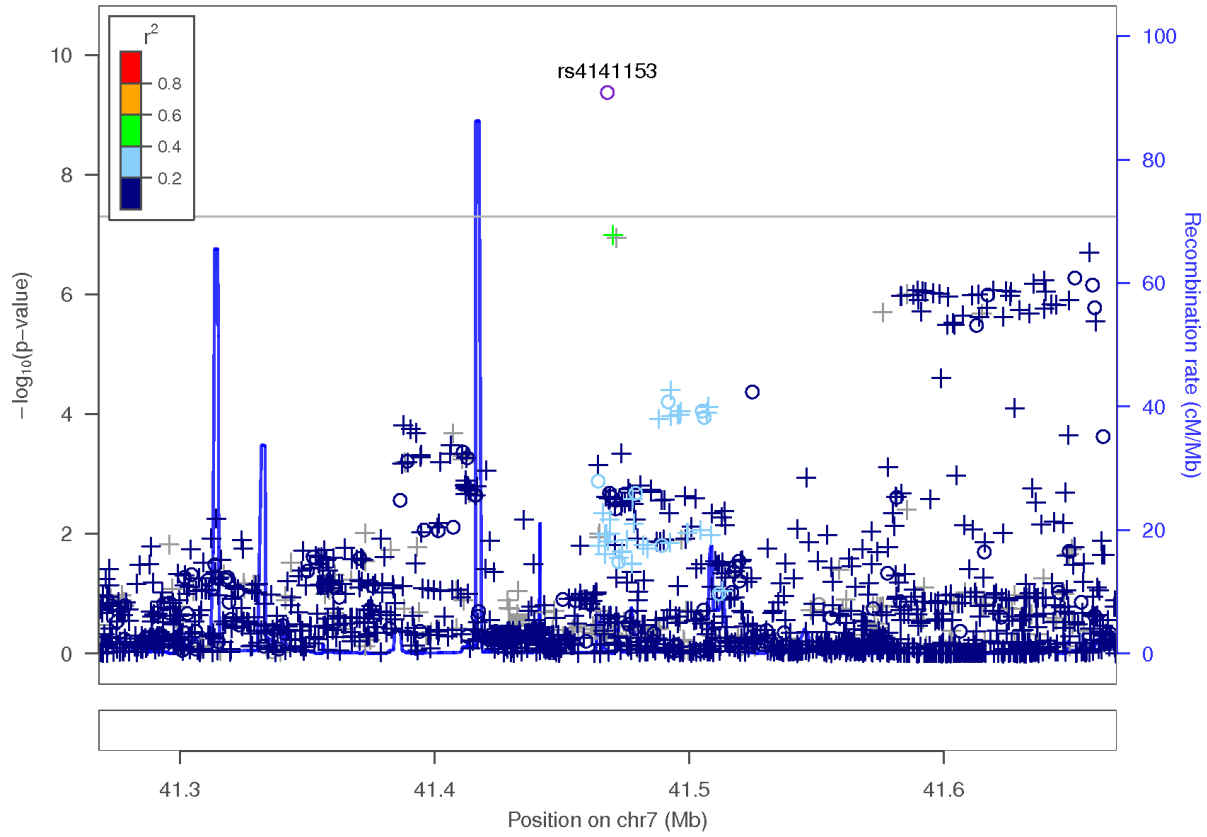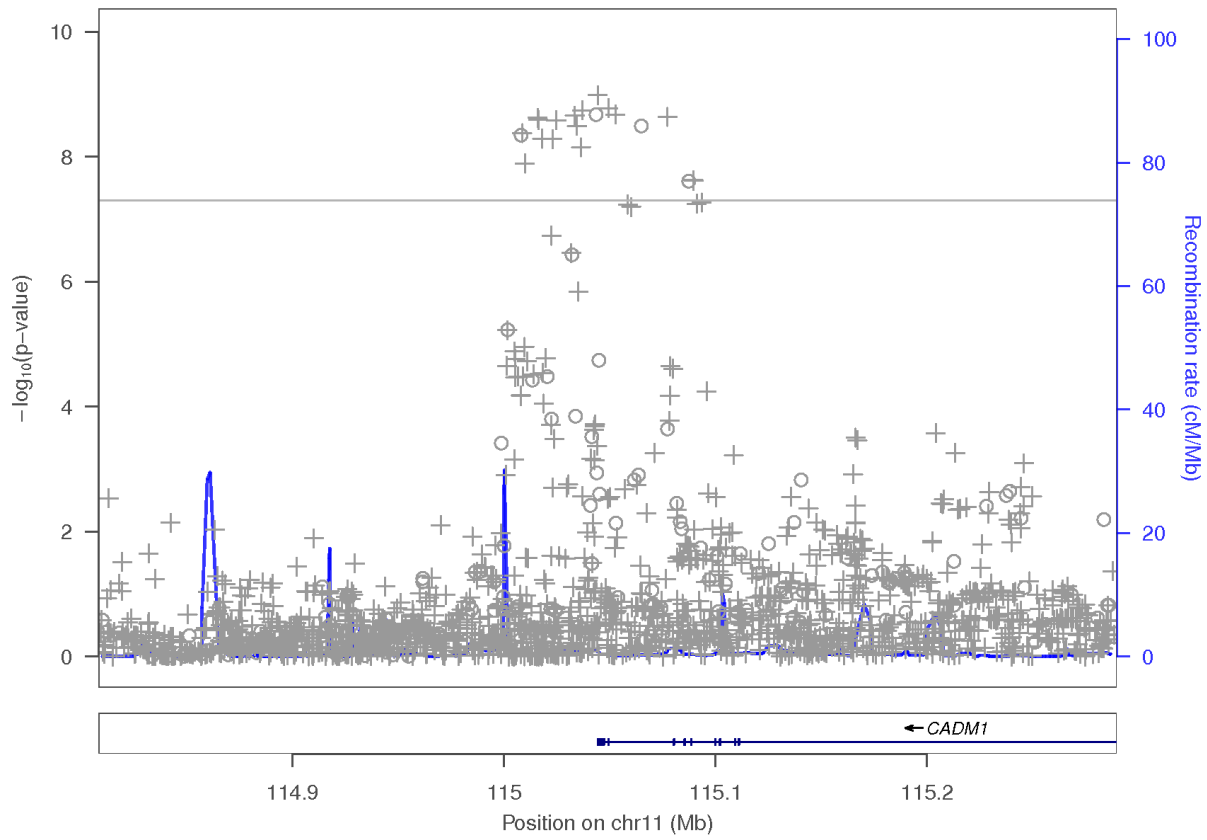

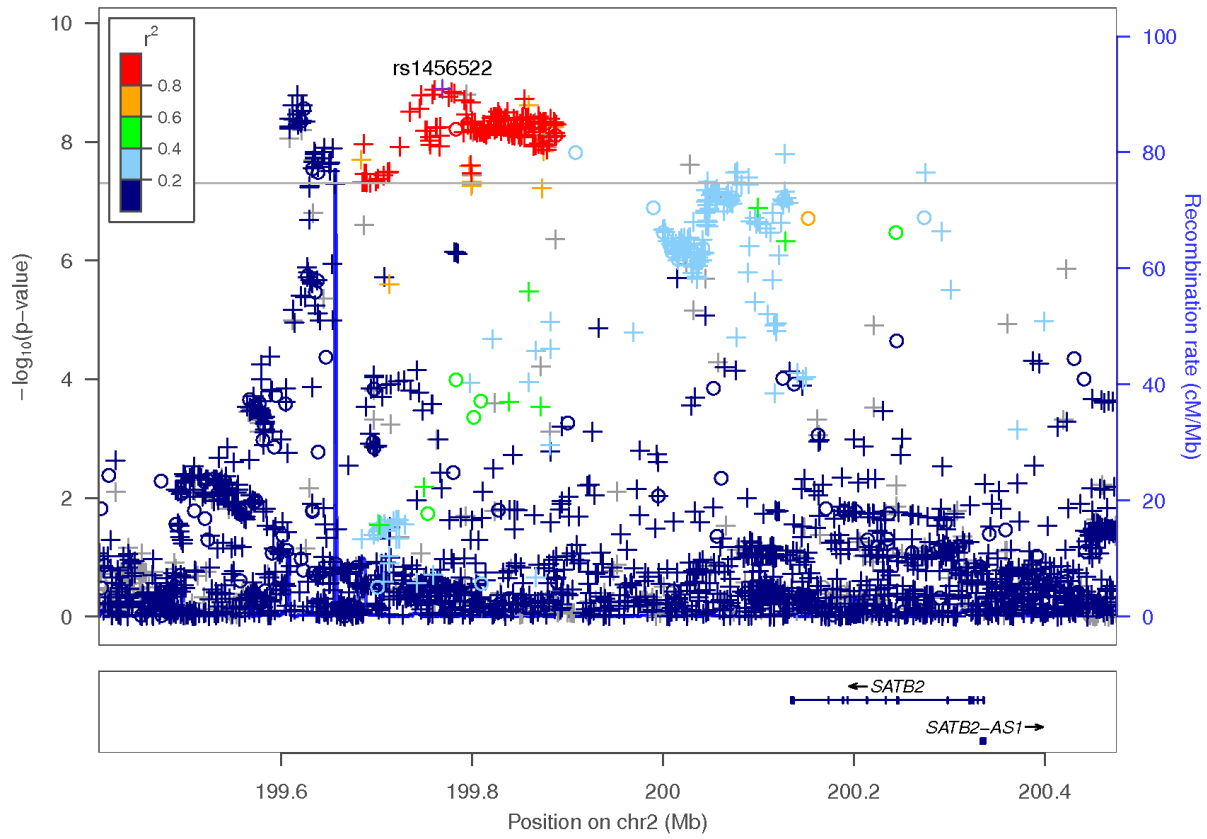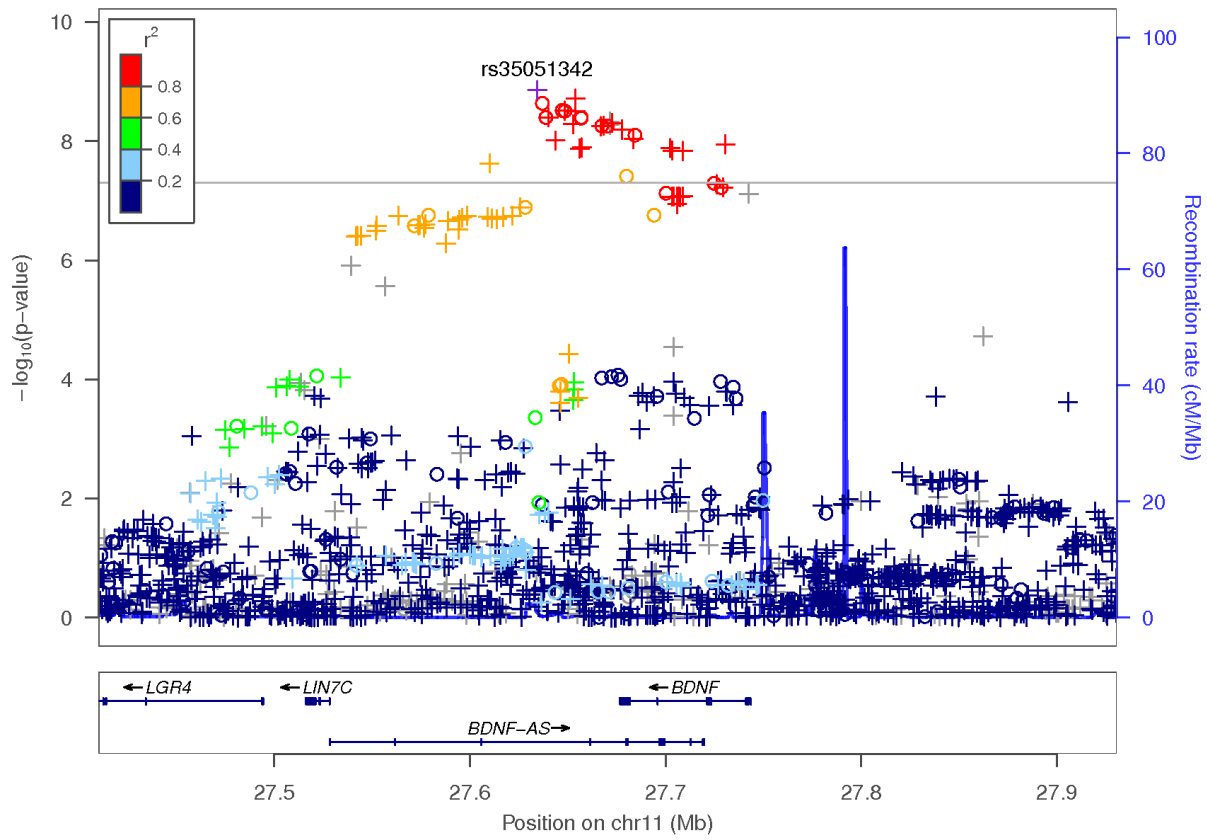

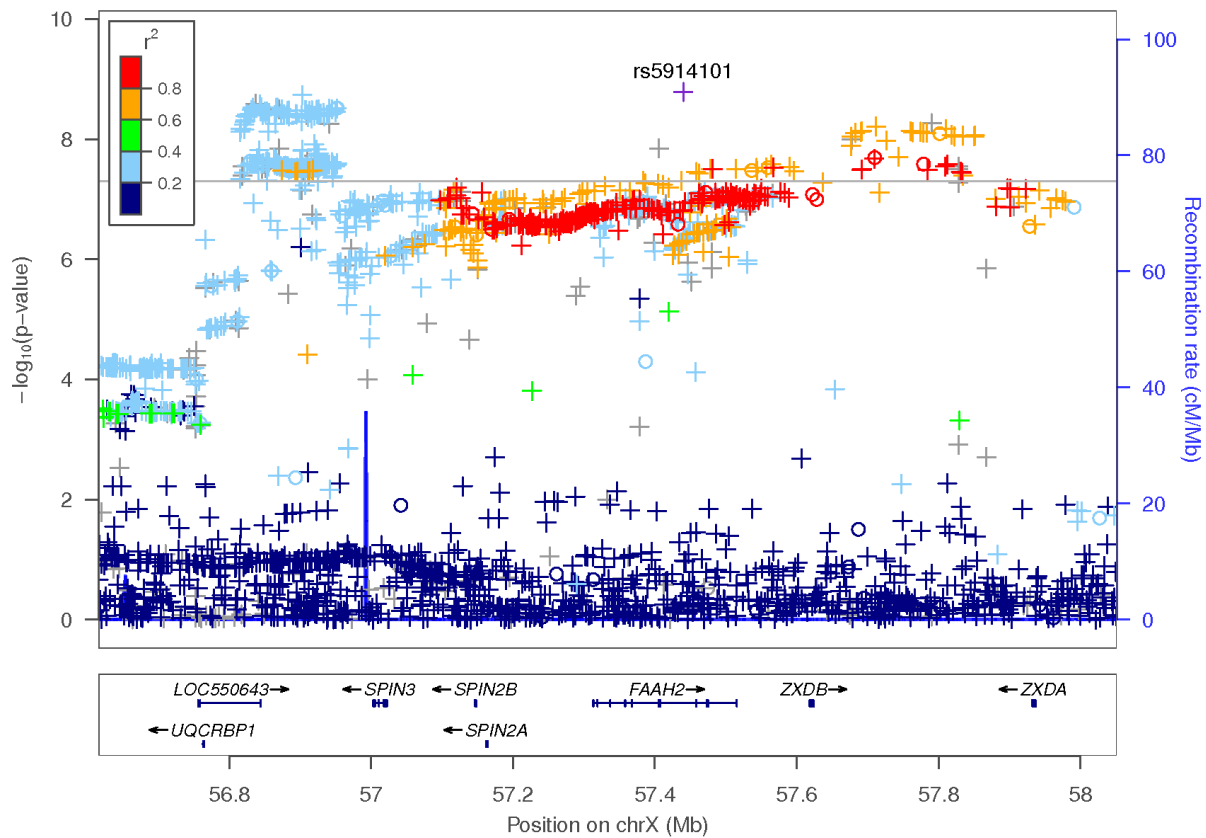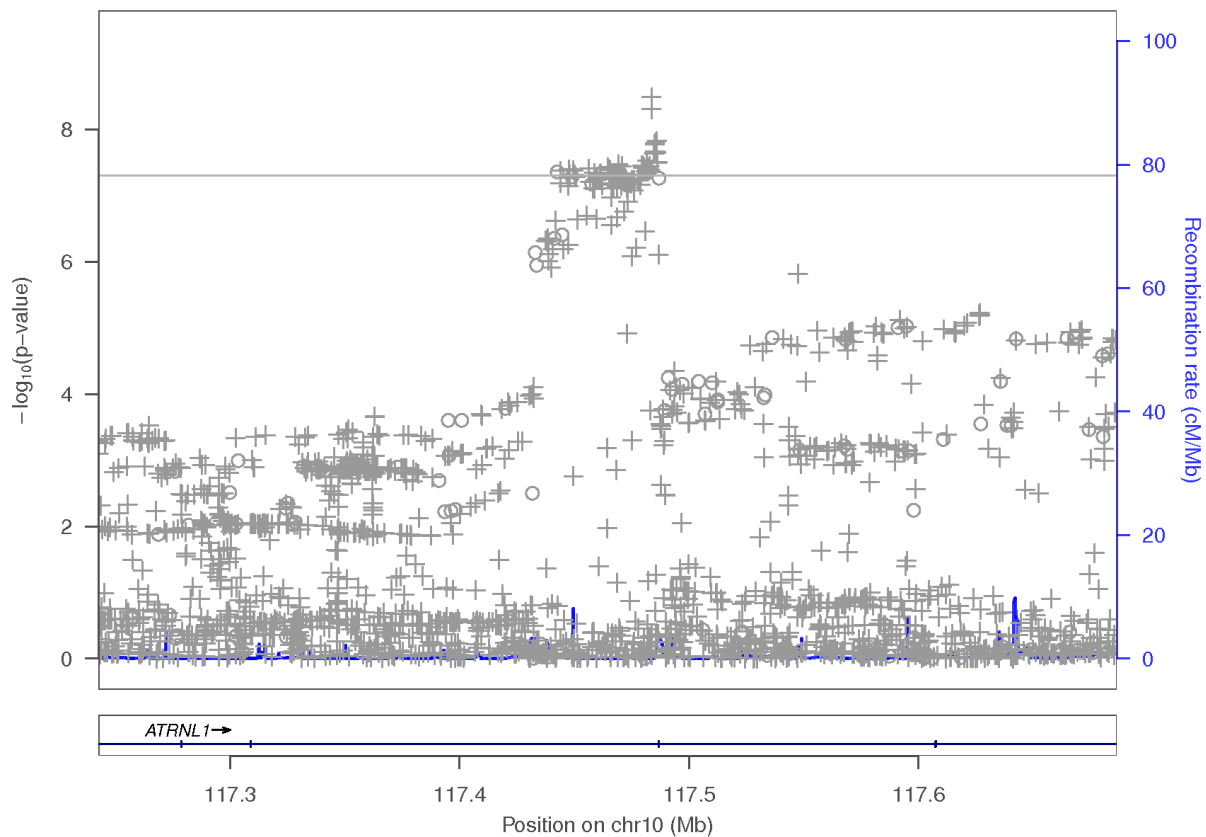

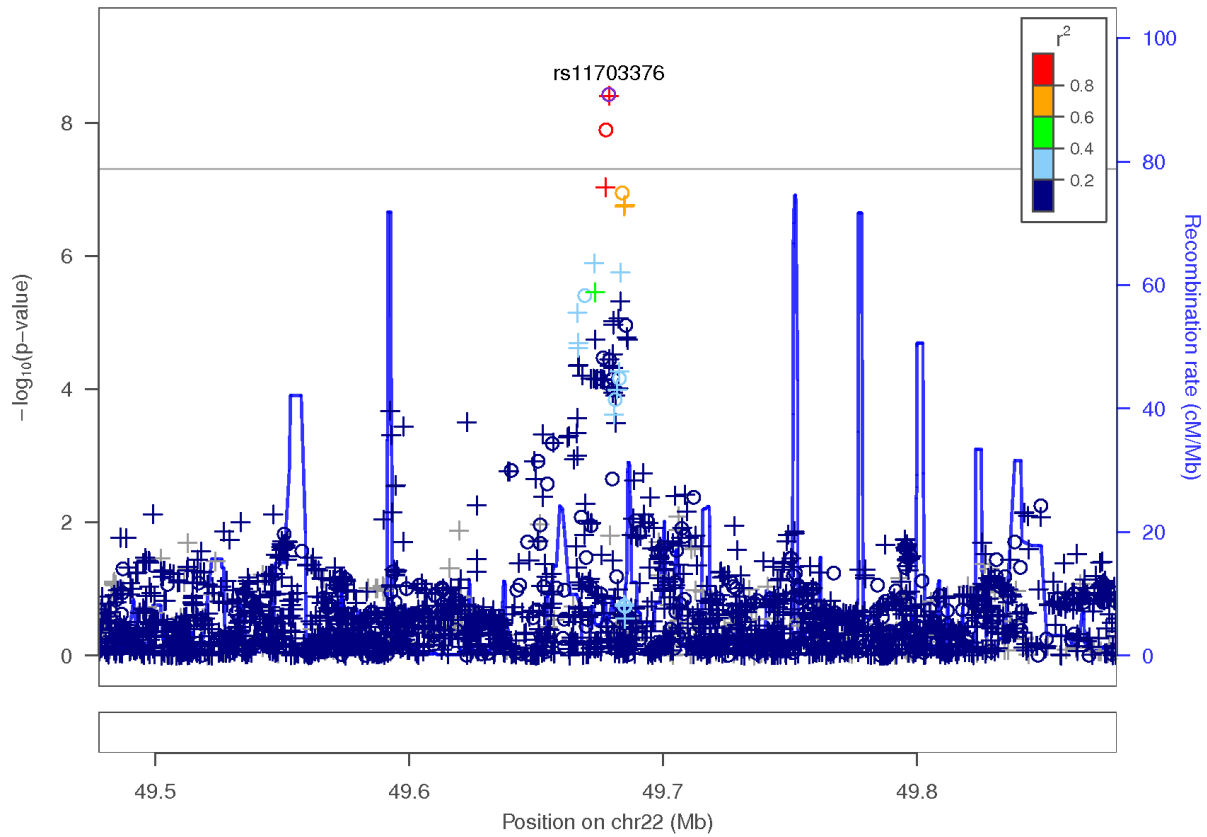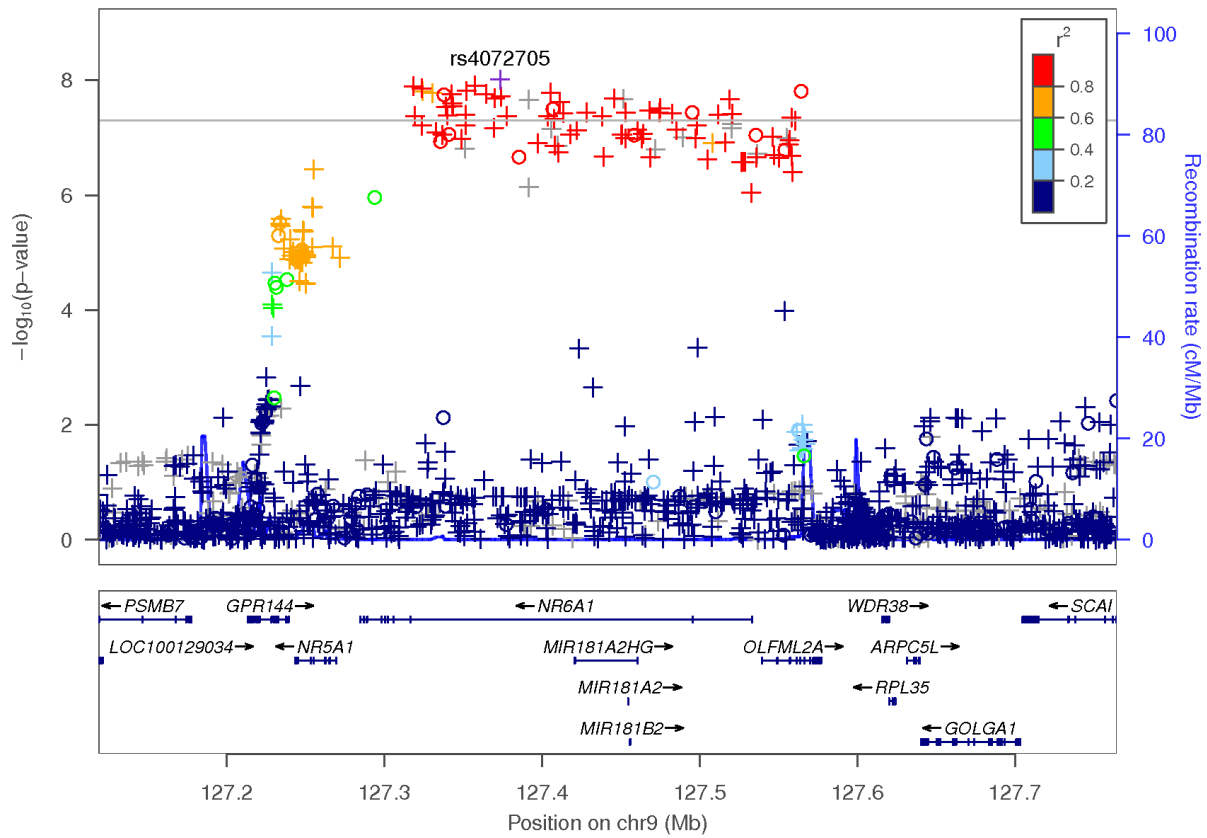

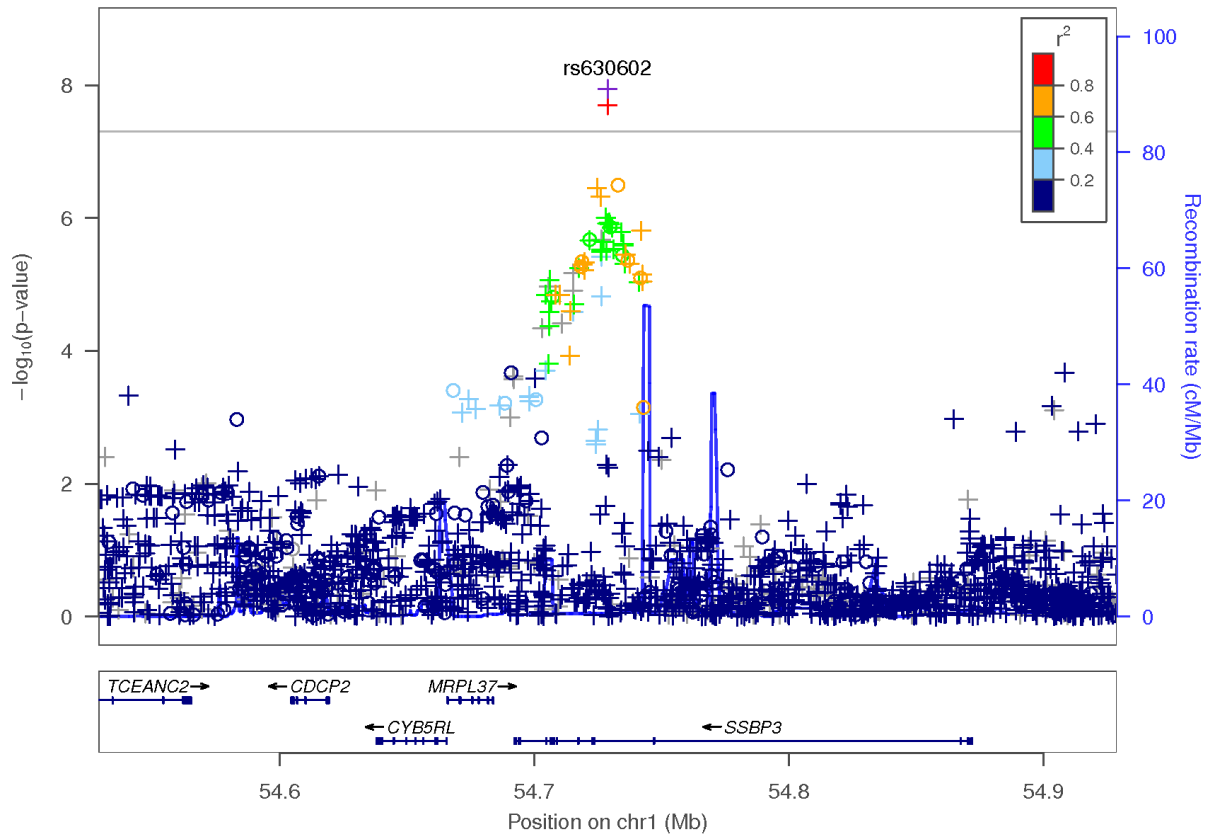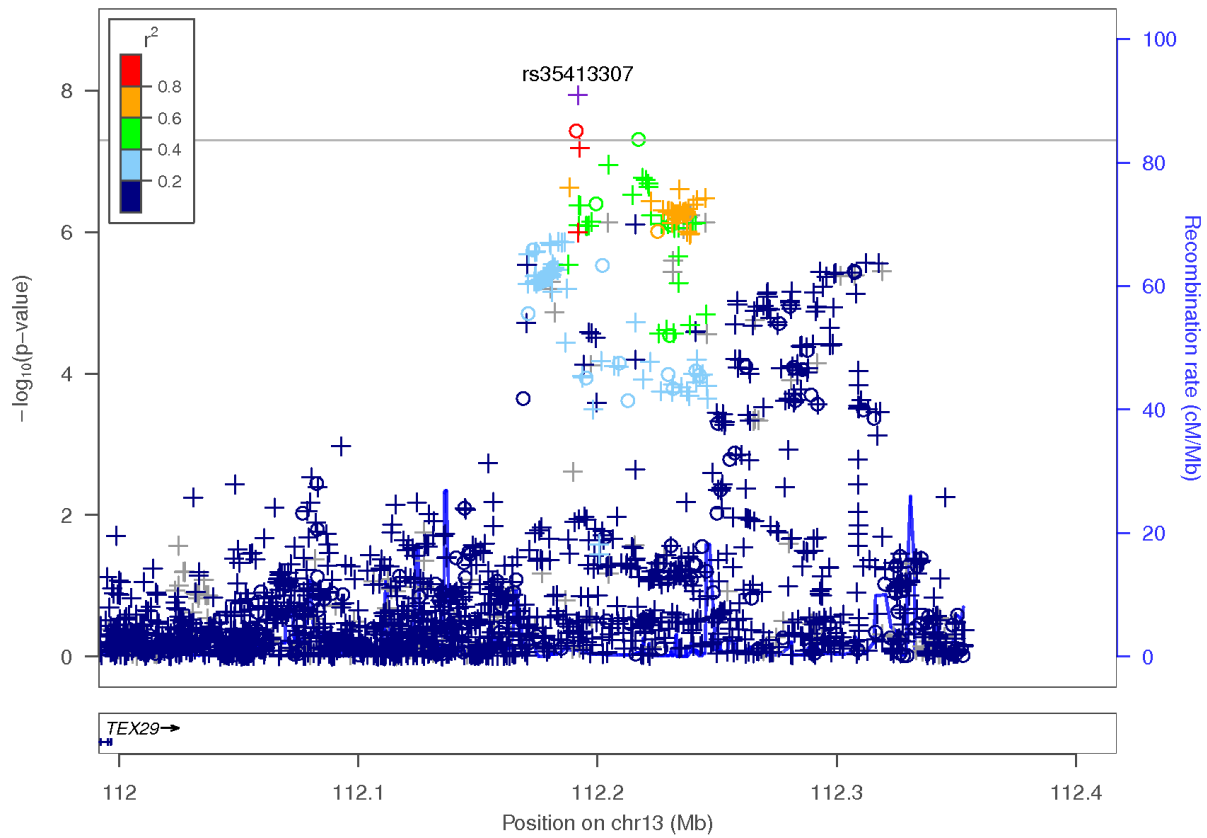

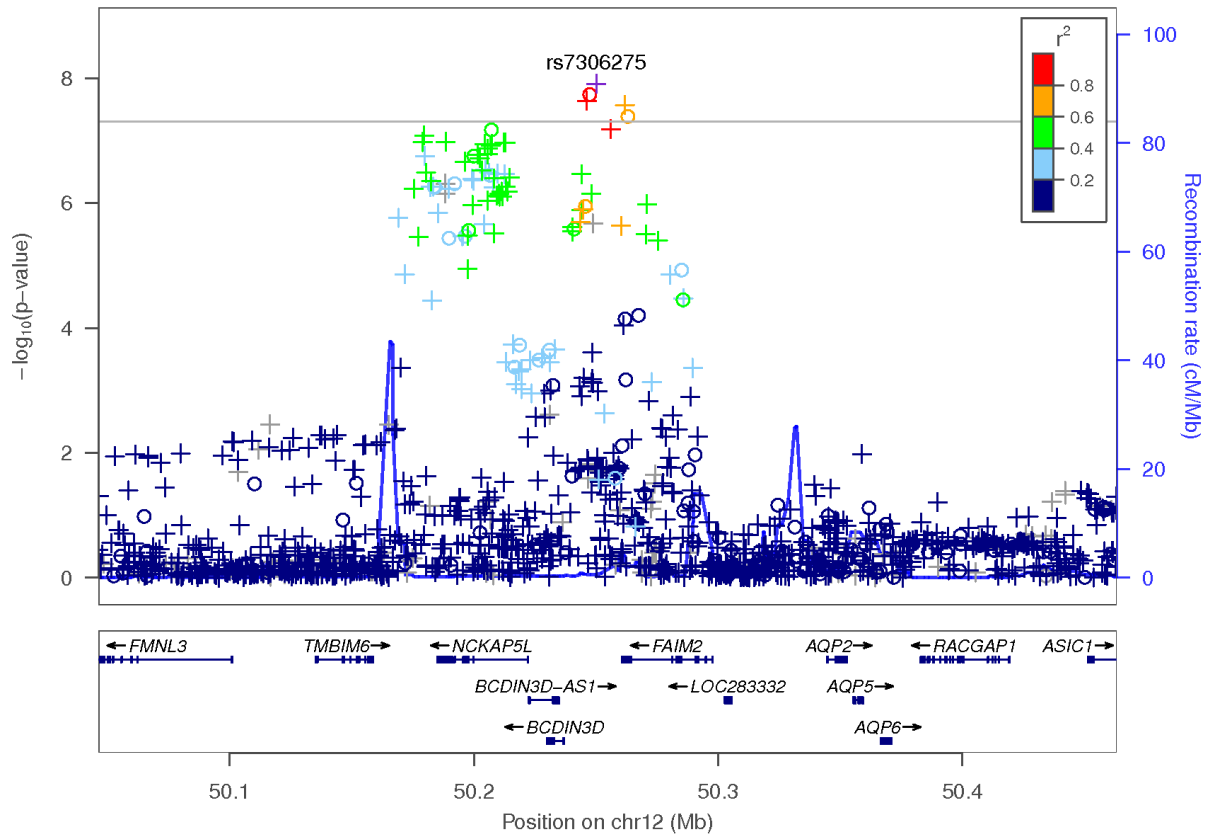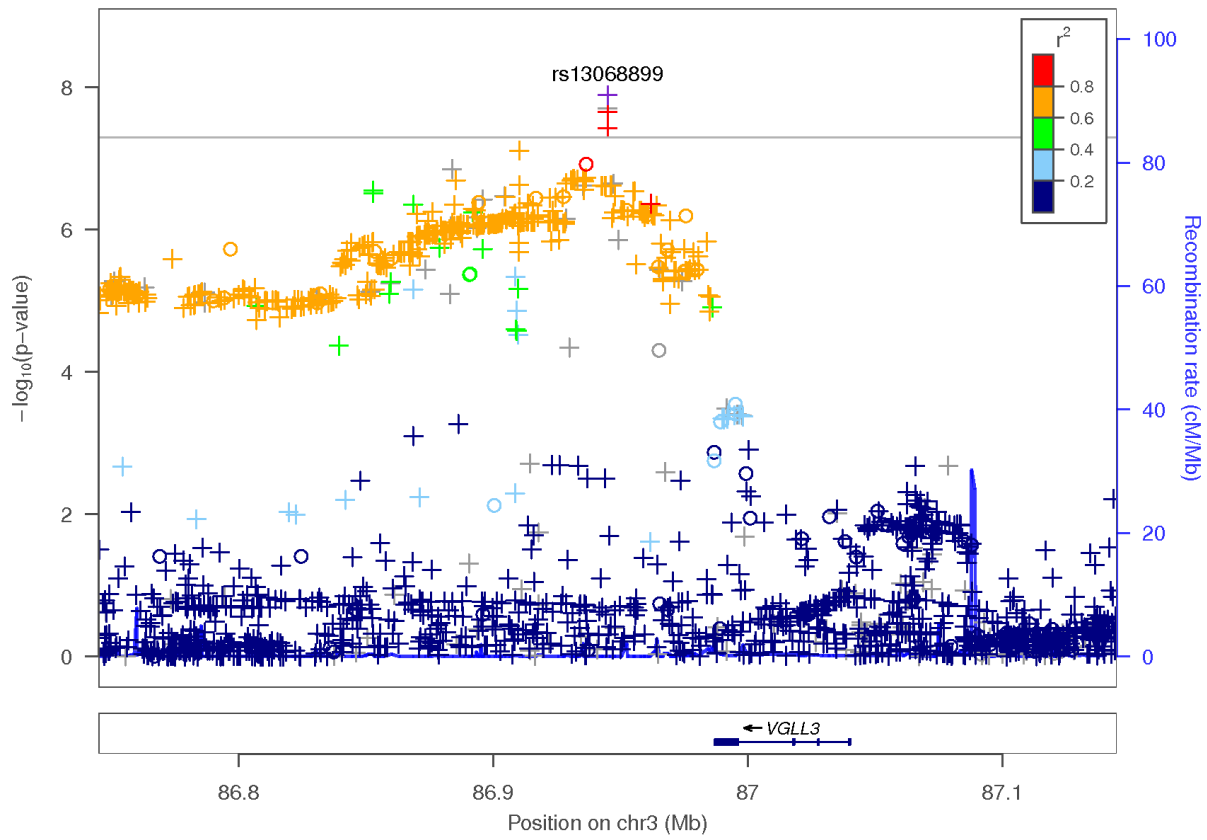



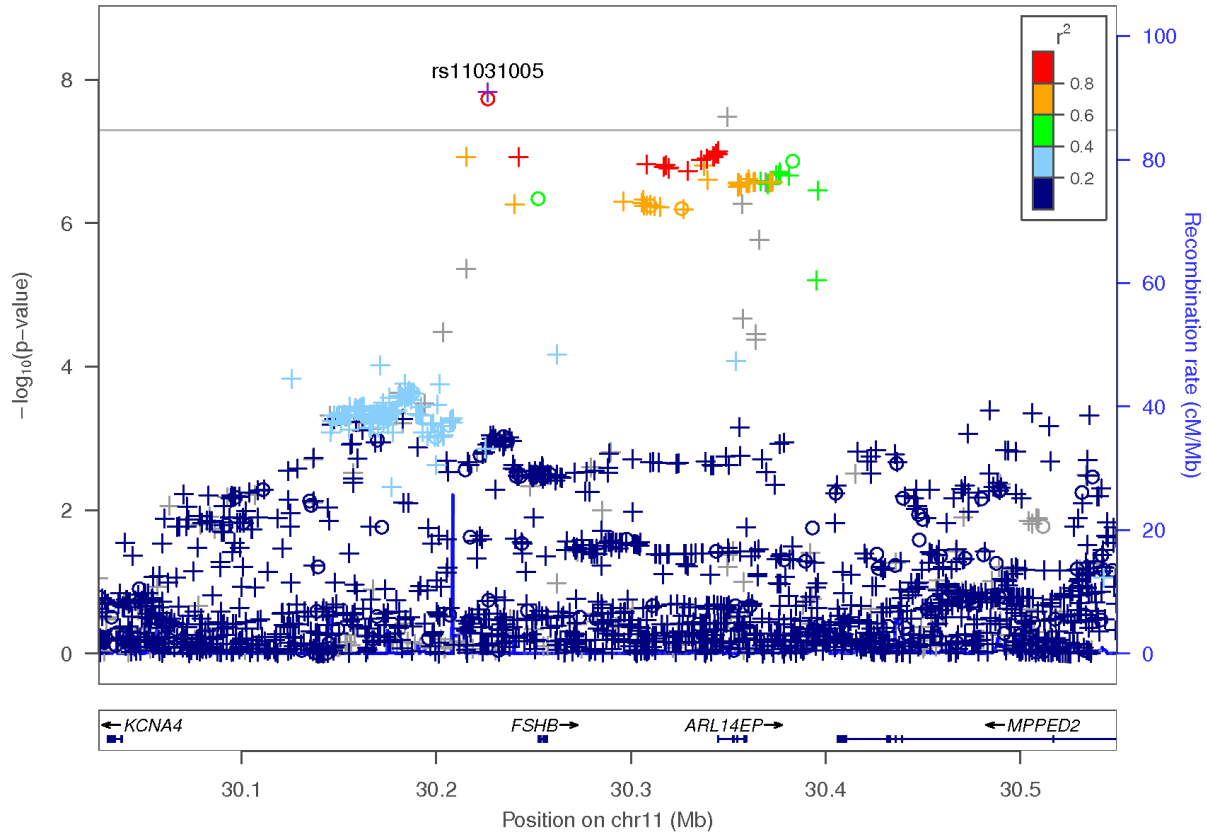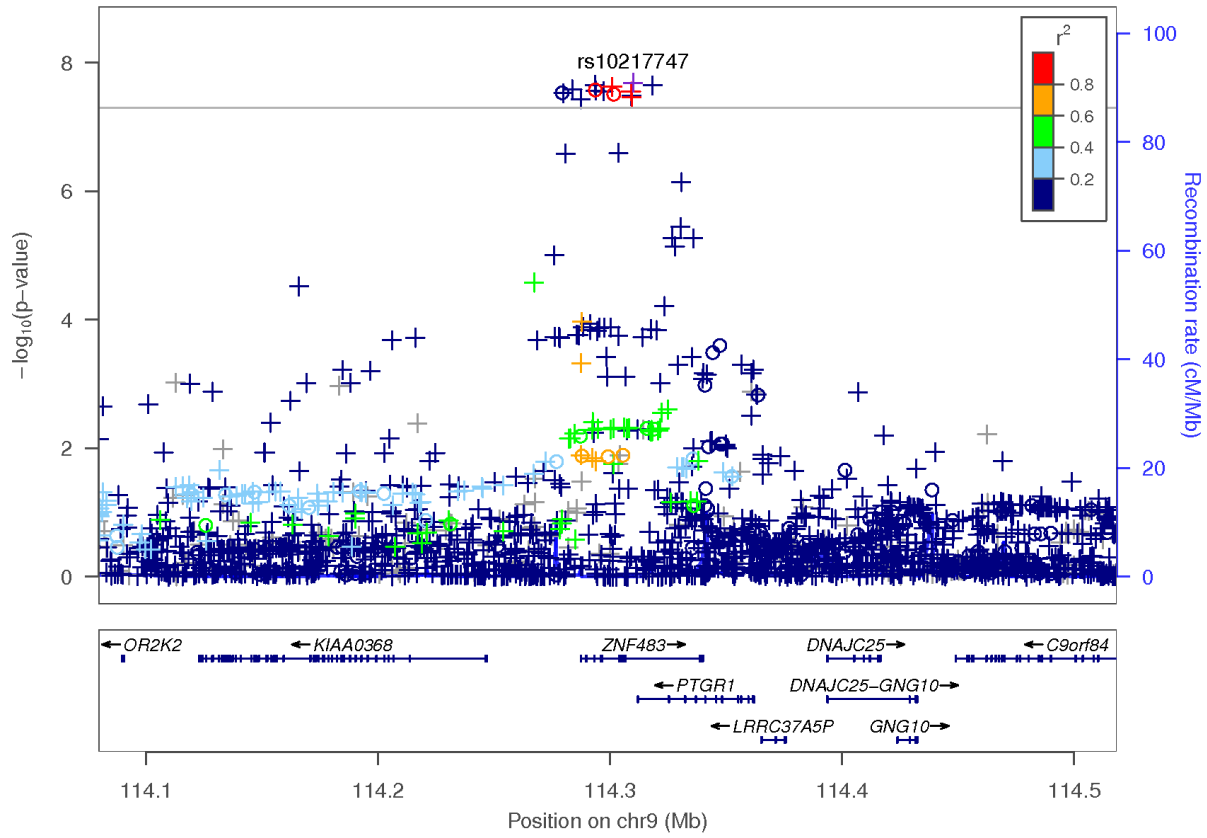

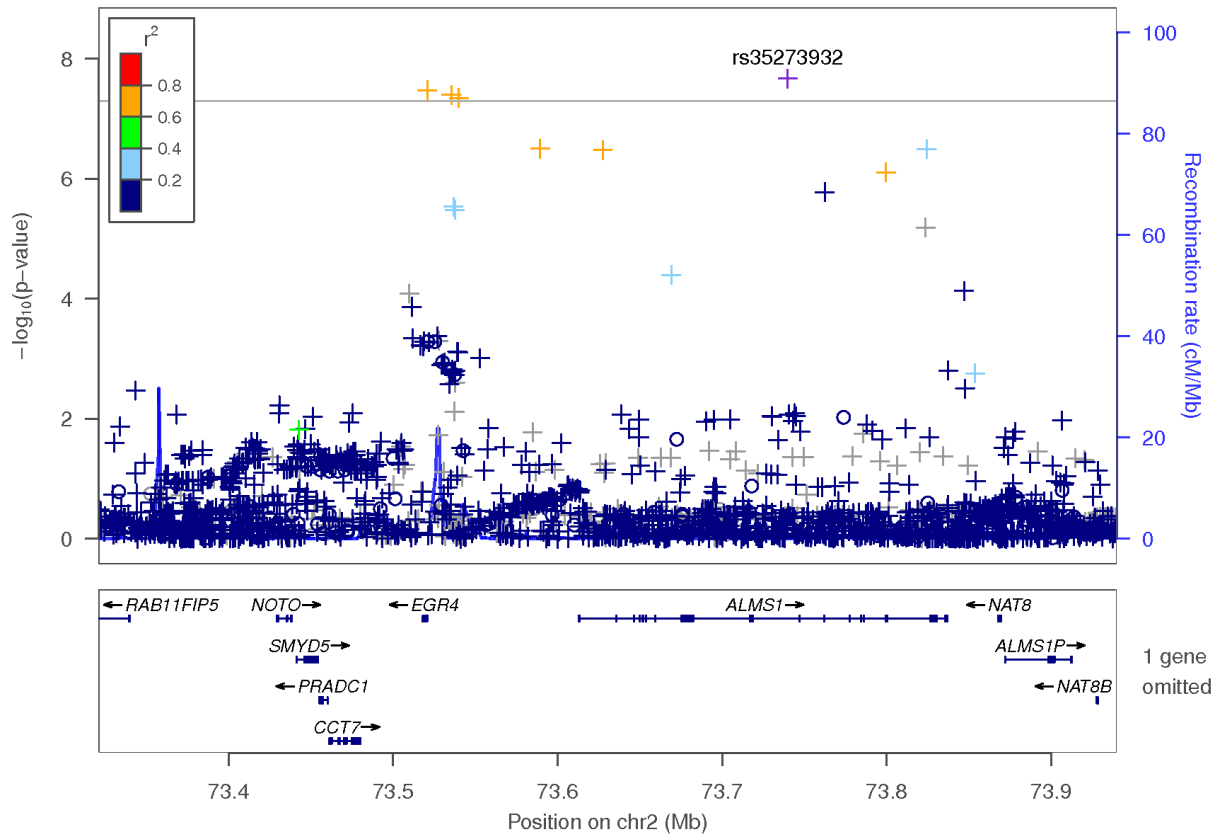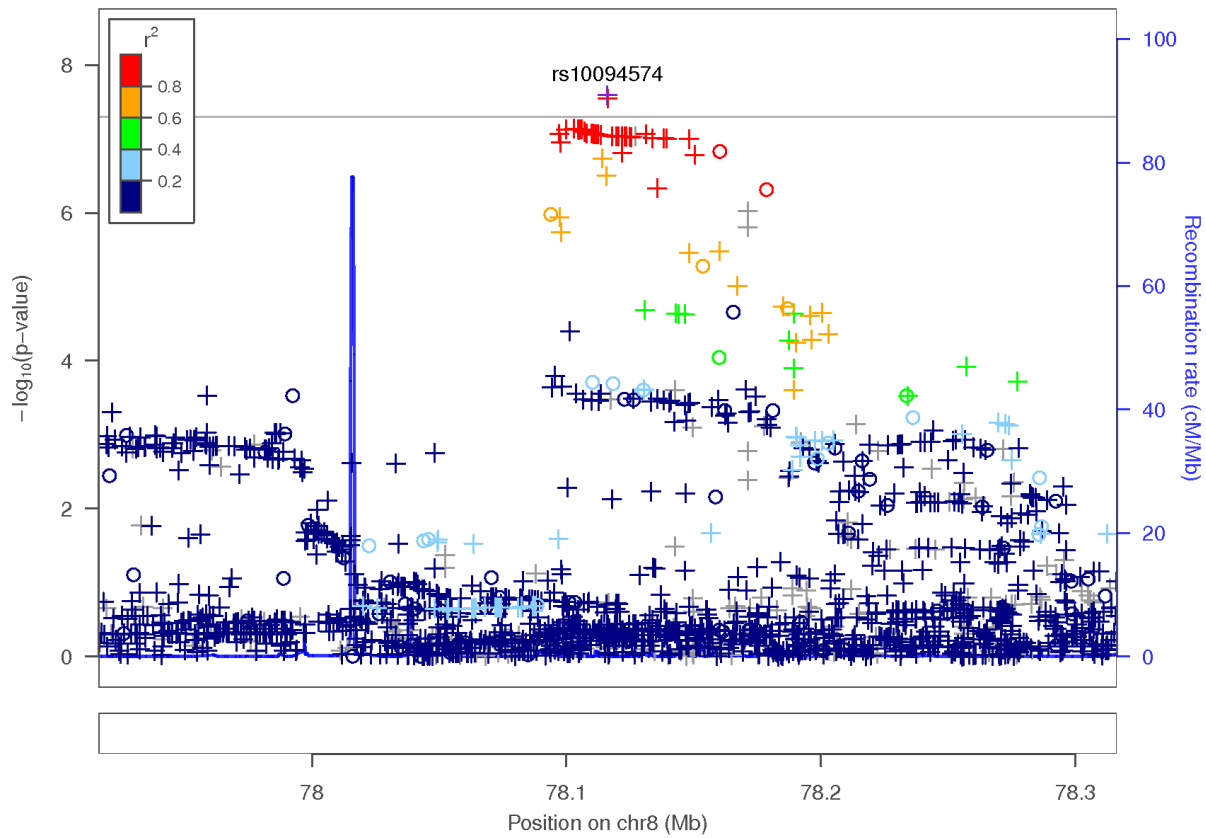

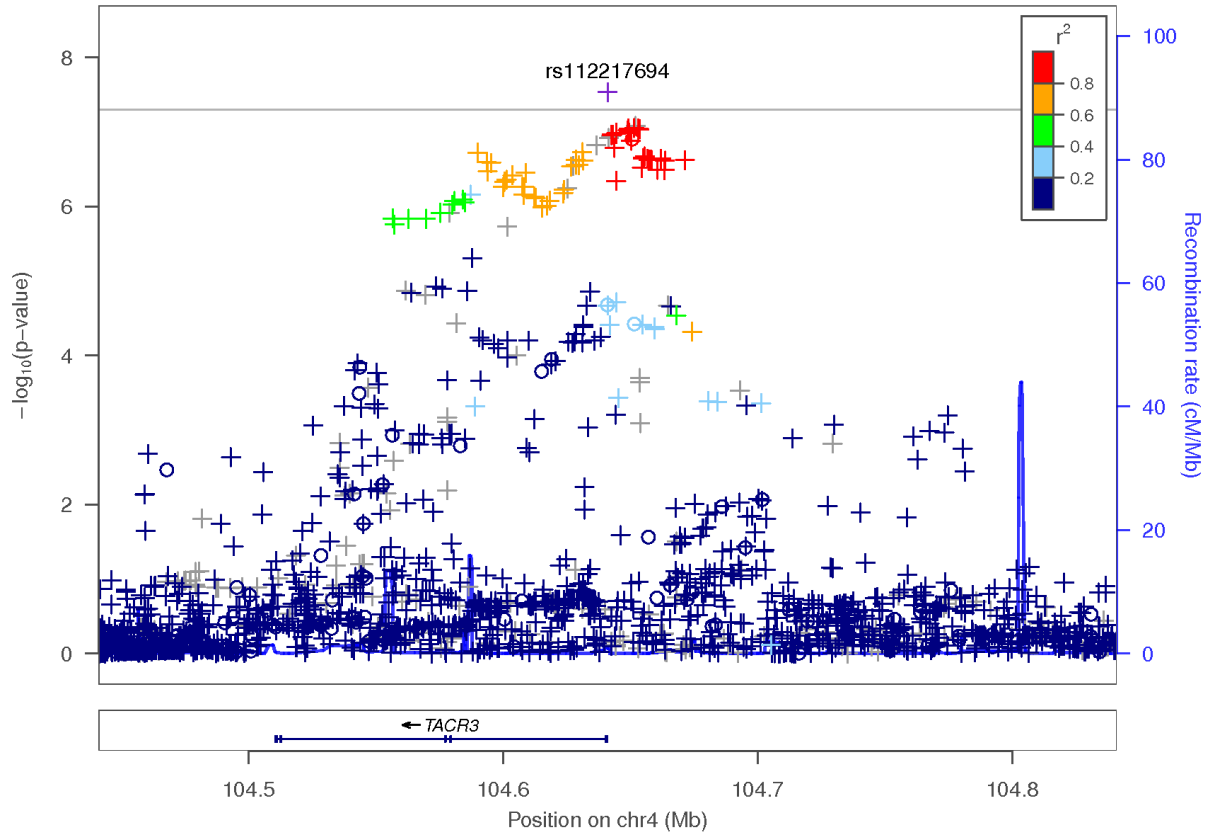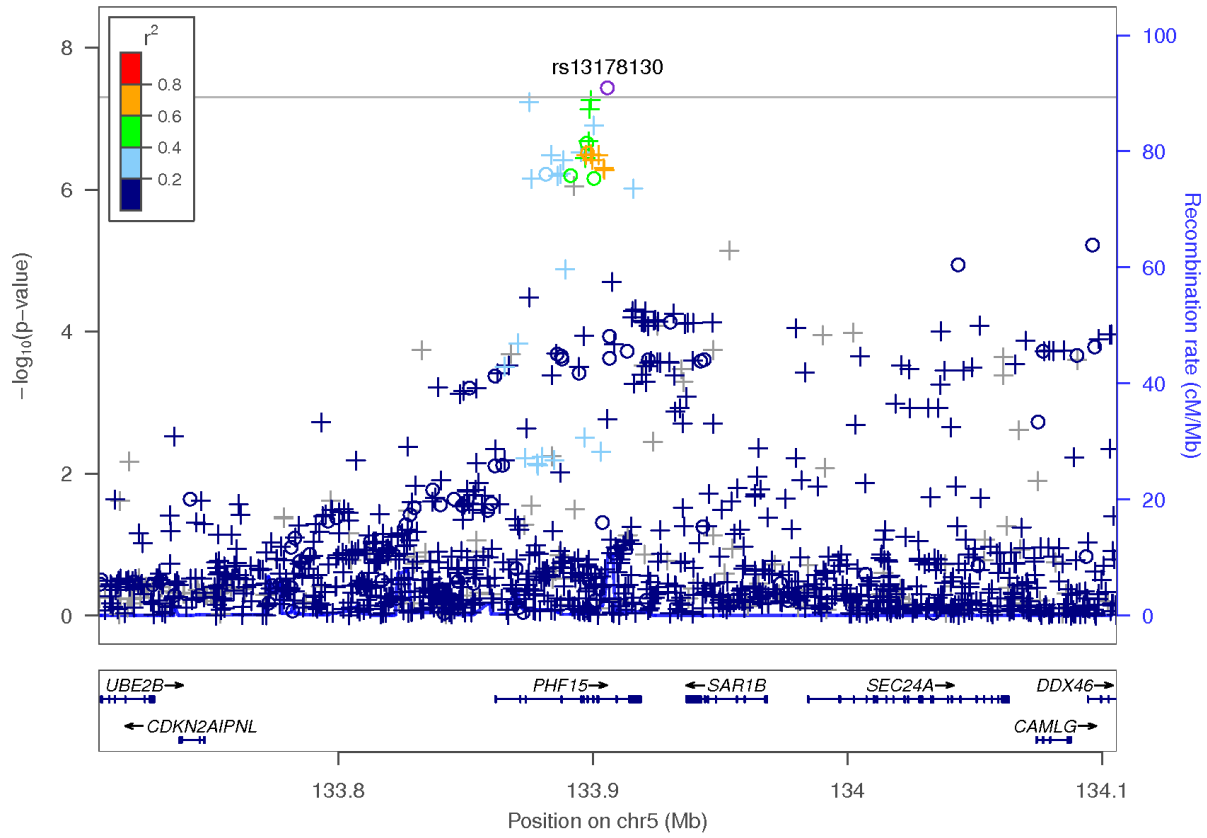

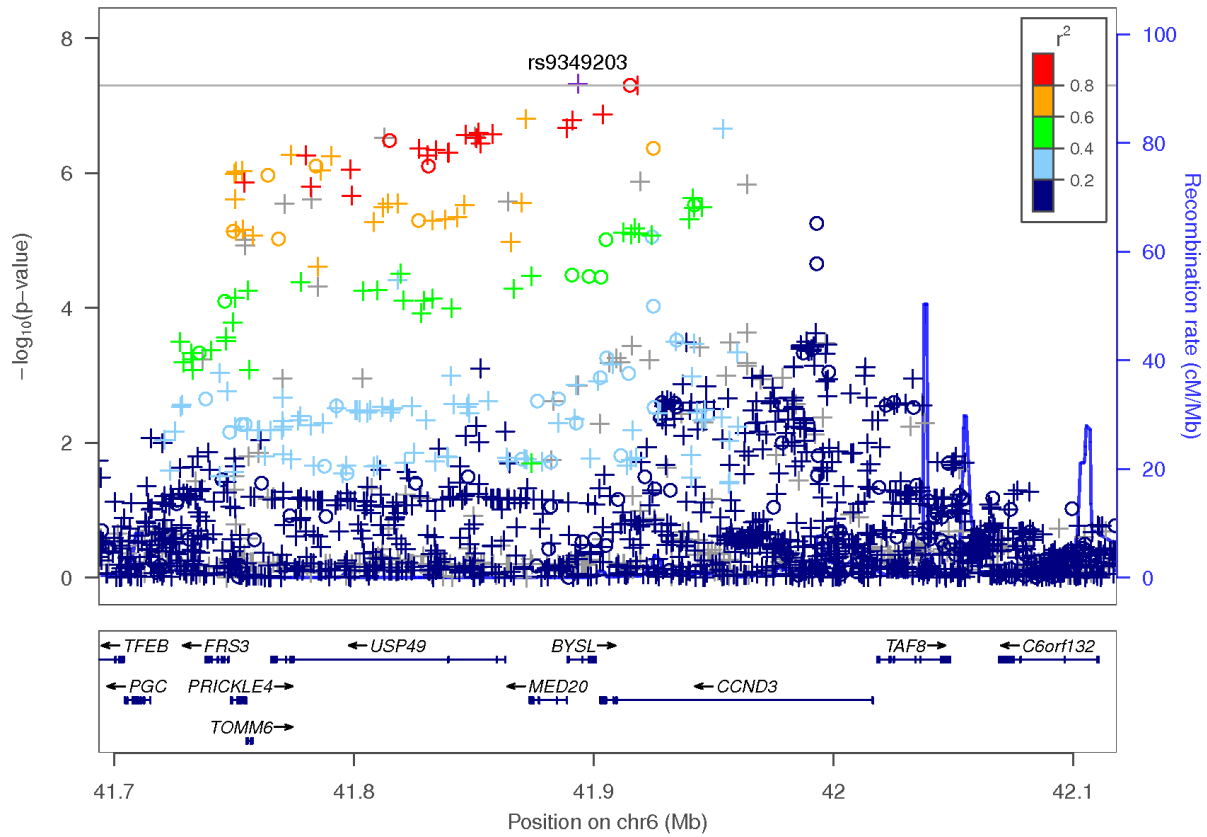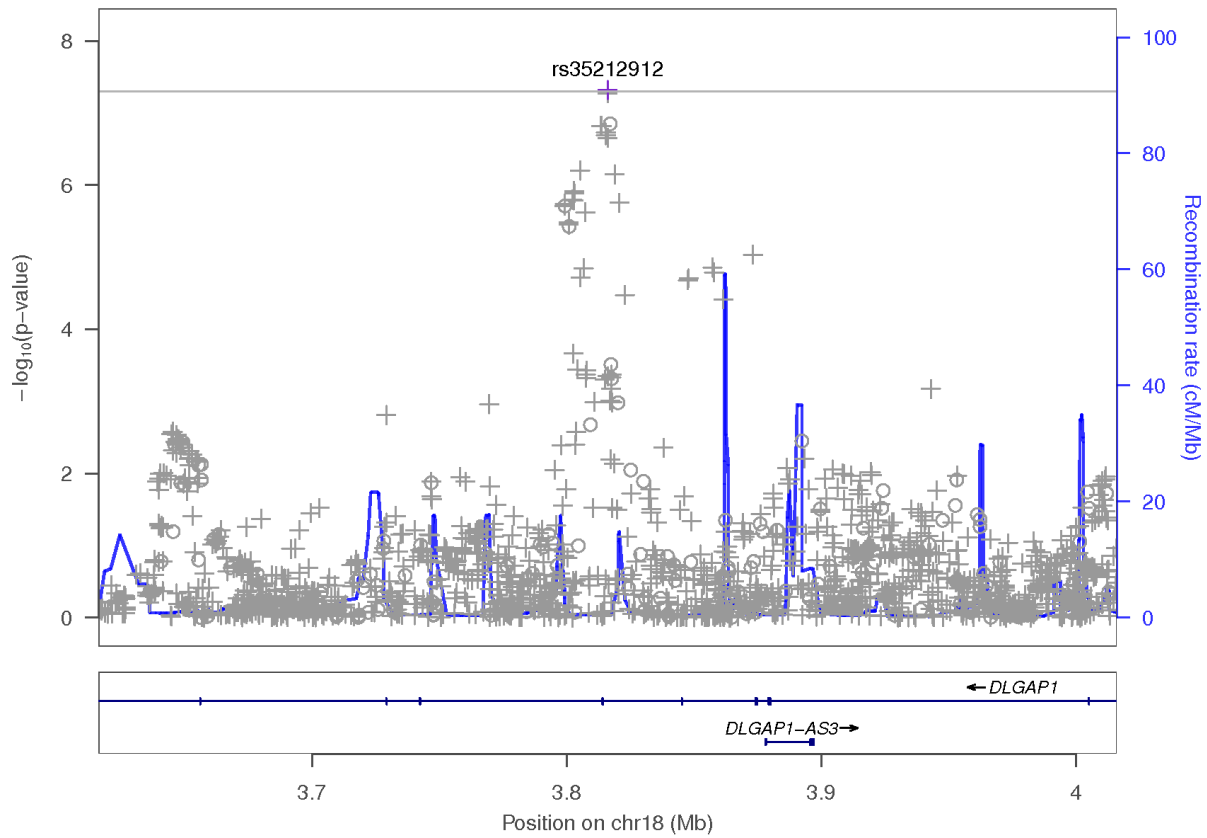

Supplement: NIHMS780506-supplement-3.pdf [file NIHMS780506-supplement-3.pdf]
