# Supplementary material
Source: PubMed Central journal article supplement (PMC5207801)

# Analysis Summary: Age of Voice Deepen

---

## Phenotype Description

---

Quantitative trait based on the following question:

- Research Snippets
  - “How old were you when your voice began to crack/deepen?” (Under 9, 9-10 years old, 11-12 years old, 13-14 years old, 15-16 years old, 17-18 years old, 19 years old or older, I’m not sure)

Responses were restricted to male customers and were scored from 0 to 6 from youngest to oldest.

## Phenotype Statistics

---

The following table shows demographics of unrelated, European individuals included in the GWAS.

| Phenotype          | Group   | Total | M     | F | (0,30] | (30,45] | (45,60] | (60,Inf] |
|--------------------|---------|-------|-------|---|--------|---------|---------|----------|
| age_voice_deepened | under_9 | 211   | 211   | 0 | 36     | 57      | 56      | 62       |
|                    | 9-10    | 1361  | 1361  | 0 | 242    | 423     | 321     | 375      |
|                    | 11-12   | 13480 | 13480 | 0 | 2281   | 4281    | 3345    | 3573     |
|                    | 13-14   | 29513 | 29513 | 0 | 4470   | 9219    | 7901    | 7923     |
|                    | 15-16   | 9119  | 9119  | 0 | 1557   | 2869    | 2444    | 2249     |
|                    | 17-18   | 1541  | 1541  | 0 | 234    | 501     | 419     | 387      |
|                    | 19+     | 646   | 646   | 0 | 83     | 177     | 167     | 219      |

The following table shows the phenotypic distribution across 23andMe genotyping platforms for individuals included in the GWAS.

| Phenotype          | Group   | Total | v1/v2 | v3    | v4   |
|--------------------|---------|-------|-------|-------|------|
| age_voice_deepened | under_9 | 211   | 5     | 171   | 35   |
|                    | 9-10    | 1361  | 23    | 1068  | 270  |
|                    | 11-12   | 13480 | 354   | 10829 | 2297 |
|                    | 13-14   | 29513 | 793   | 23940 | 4780 |
|                    | 15-16   | 9119  | 268   | 7468  | 1383 |
|                    | 17-18   | 1541  | 51    | 1230  | 260  |
|                    | 19+     | 646   | 15    | 530   | 101  |

## Null Model with Covariates

---

The following table shows results of fitting a model for the trait based on just the covariates. Principal coordinates have been standardized, so these effect sizes are in units of standard deviations.

|      | Estimate  | Std. Error | t value | Pr(> t )              |
|------|-----------|------------|---------|-----------------------|
| age  | 0.000470  | 0.000231   | 2.0     | 0.042                 |
| pc.0 | -0.005311 | 0.003661   | -1.5    | 0.15                  |
| pc.1 | 0.033576  | 0.003685   | 9.1     | $8.3 \times 10^{-20}$ |
| pc.2 | -0.000139 | 0.003672   | -0.0    | 0.97                  |
| pc.3 | 0.020241  | 0.003674   | 5.5     | $3.6 \times 10^{-8}$  |
| pc.4 | 0.000392  | 0.003663   | 0.1     | 0.91                  |

## Q-Q plot of scaled residuals

---

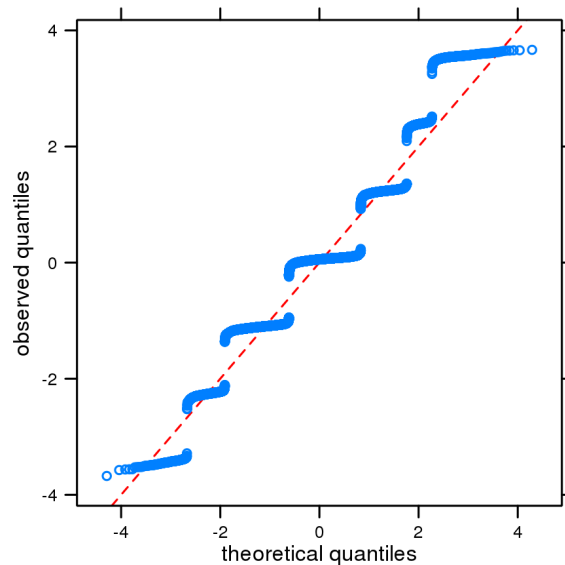

## SNP-level QC information

The following table shows results for QC filters on the genotyped data:

|                         | <b>failed</b> | <b>passed</b> |
|-------------------------|---------------|---------------|
| no filters              | 0             | 1030430       |
| not V1-only, chrM, chrY | 4790          | 1025640       |
| parent-offspring test   | 2129          | 1023511       |
| MAF > 0%                | 3203          | 1020494       |
| HWE > 1e-20             | 48225         | 972832        |
| gt.rate > 90%           | 30775         | 952826        |
| batch effects           | 28267         | 945446        |

The following table shows results for QC filters on the imputed dosage data:

|                    | <b>failed</b> | <b>passed</b> |
|--------------------|---------------|---------------|
| no filters         | 0             | 13733809      |
| MAF > 0%           | 0             | 13733809      |
| imputation quality | 0             | 13733809      |
| batch effects      | 2168          | 13731641      |

The following table shows results for QC filters on the merged association test results:

|                | <b>passed</b> | <b>total</b> |
|----------------|---------------|--------------|
| imputed only   | 12833621      | 12833621     |
| both passed    | 898002        | 13731623     |
| genotyped only | 47444         | 13779067     |
| no test result | -13980        | 13765087     |
| MAF < 0.1%     | -1725596      | 12039491     |

## Genetic Association Tests

We performed linear regression assuming an additive model for allelic effects, using the model:

$$age\_voice\_deepened \sim age + pc.0 + pc.1 + pc.2 + pc.3 + pc.4 + genotype$$

This genome-wide association analysis includes data from 55871 individuals of European ancestry, filtered to remove close relatives.

The results in this report have been adjusted for a genomic control inflation factor  $\lambda=1.077$ . The equivalent inflation factor rescaled for a sample size of 2000 would be  $\lambda_{2000}=1.003$ , and for 20000,  $\lambda_{20000}=1.028$ .

## Manhattan Plot

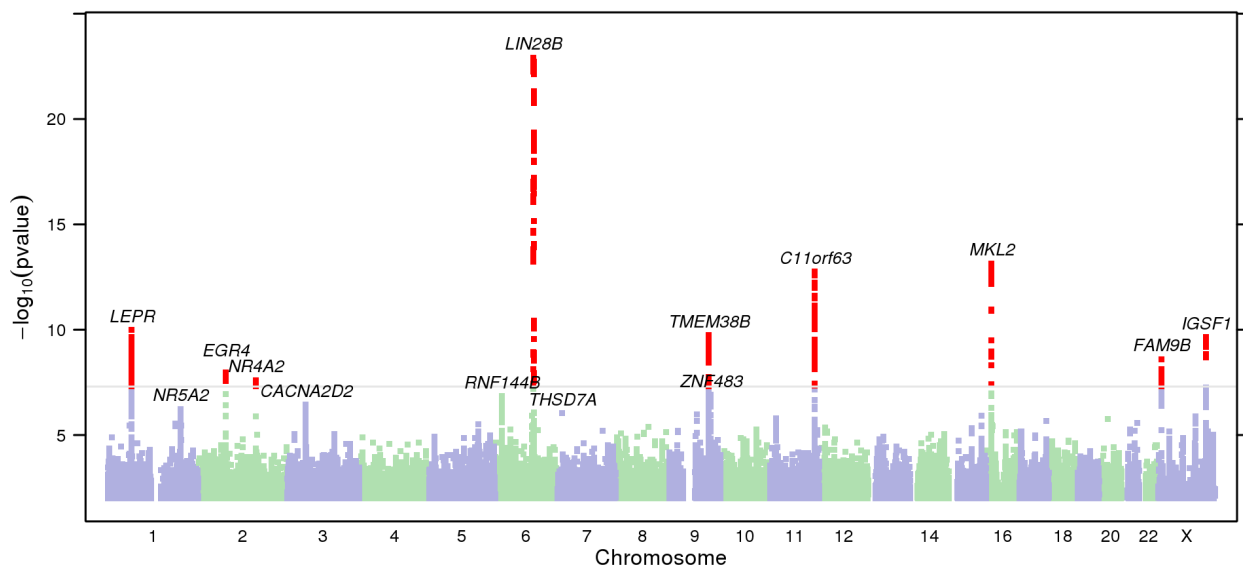

## Q-Q Plot of GWAS Results

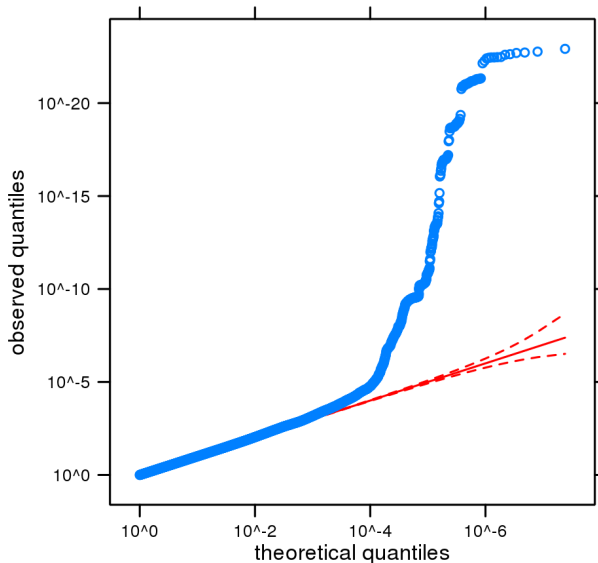

## Index SNPs for Strongest Associations

| cytoband | assay.name  | scaffold | position  | alleles | src | pvalue                | effect | 95% CI          | gene.context            |
|----------|-------------|----------|-----------|---------|-----|-----------------------|--------|-----------------|-------------------------|
| 6q16.3   | rs9391253   | chr6     | 105367616 | A/T     | I   | $1.2 \times 10^{-23}$ | 0.058  | [0.046,0.069]   | HACE1--[--]--LIN28B     |
| 16p13.12 | rs246185    | chr16    | 14395432  | C/T     | I   | $7.1 \times 10^{-14}$ | -0.044 | [-0.056,-0.032] | MKL2--[--]---PARN       |
| 11q24.1  | rs7110373   | chr11    | 122813224 | C/T     | I   | $1.7 \times 10^{-13}$ | 0.040  | [0.029,0.050]   | [C11orf63]              |
| 1p31.3   | rs140410685 | chr1     | 66118329  | D/I     | I   | $1.0 \times 10^{-10}$ | 0.045  | [0.032,0.059]   | LEPR--[--]---PDE4B      |
| 9q31.2   | rs9408817   | chr9     | 108911979 | A/G     | I   | $1.8 \times 10^{-10}$ | 0.037  | [0.025,0.048]   | TMEM38B---[--]---ZNF462 |
| Xq26.2   | rs5932886   | chrX     | 130434001 | C/T     | I   | $2.3 \times 10^{-10}$ | 0.031  | [0.022,0.041]   | IGSF1--[--]---OR13H1    |
| Xp22.31  | rs5978985   | chrX     | 8895216   | G/T     | I   | $2.5 \times 10^{-9}$  | -0.024 | [-0.032,-0.016] | FAM9A---[--]--FAM9B     |
| 2p13.1   | rs35327298  | chr2     | 73540044  | C/T     | I   | $1.1 \times 10^{-8}$  | -0.159 | [-0.214,-0.105] | EGR4--[--]--ALMS1       |
| 2q24.1   | rs142058842 | chr2     | 156621725 | C/G     | I   | $2.4 \times 10^{-8}$  | 0.040  | [0.026,0.054]   | KCNJ3---[--]---NR4A2    |
| 9q31.3   | rs10980922  | chr9     | 114280868 | A/T     | I   | $1.3 \times 10^{-7}$  | 0.052  | [0.033,0.072]   | KIAA0368---[--]--ZNF483 |
| 6p22.3   | rs9350100   | chr6     | 19076417  | C/T     | I   | $1.4 \times 10^{-7}$  | -0.036 | [-0.049,-0.023] | RNF144B---[--]---ID4    |
| 3p21.31  | rs2282752   | chr3     | 50433967  | C/G     | I   | $3.6 \times 10^{-7}$  | -0.038 | [-0.053,-0.024] | [CACNA2D2]              |
| 1q32.1   | rs6681737   | chr1     | 199857582 | A/G     | I   | $5.8 \times 10^{-7}$  | 0.027  | [0.017,0.038]   | [---NR5A2]              |
| 7p21.3   | rs148707903 | chr7     | 11512876  | D/I     | I   | $9.2 \times 10^{-7}$  | 0.471  | [0.283,0.659]   | [THSD7A]                |

## Quality Statistics for Index SNPs

| assay.name  | is.v2 | is.v3 | is.v4 | gt.rate | hw.p.value            | p.date               | freq.b | avg.rsqr | min.rsqr | p.batch               | dose.b | qc.mask |
|-------------|-------|-------|-------|---------|-----------------------|----------------------|--------|----------|----------|-----------------------|--------|---------|
| rs9391253   | FALSE | FALSE | FALSE |         |                       |                      |        | 0.9918   | 0.9815   | 0.26                  | 0.3190 | v2v3v4  |
| rs246185    | FALSE | TRUE  | FALSE | 0.9365  | $1.3 \times 10^{-36}$ | $2.3 \times 10^{-5}$ | 0.6700 | 0.9388   | 0.6954   | 0.024                 | 0.6746 | v2v3v4  |
| rs7110373   | FALSE | FALSE | FALSE |         |                       |                      |        | 0.9966   | 0.9917   | 0.032                 | 0.5089 | v2v3v4  |
| rs140410685 | FALSE | FALSE | FALSE |         |                       |                      |        | 0.9820   | 0.9799   | 0.00010               | 0.8189 | v2v3v4  |
| rs9408817   | FALSE | FALSE | FALSE |         |                       |                      |        | 0.9927   | 0.9853   | 0.50                  | 0.6732 | v2v3v4  |
| rs5932886   | FALSE | FALSE | FALSE |         |                       |                      |        | 0.9927   | 0.9884   | 0.0095                | 0.8177 | v2v3v4  |
| rs5978985   | FALSE | FALSE | FALSE |         |                       |                      |        | 0.8970   | 0.8686   | 0.00024               | 0.4991 | v2v3v4  |
| rs35327298  | FALSE | FALSE | FALSE |         |                       |                      |        | 0.9071   | 0.8562   | 0.00053               | 0.9895 | v2v3v4  |
| rs142058842 | FALSE | FALSE | FALSE |         |                       |                      |        | 0.9864   | 0.9670   | 0.043                 | 0.1700 | v2v3v4  |
| rs10980922  | FALSE | FALSE | FALSE |         |                       |                      |        | 0.9396   | 0.9229   | 0.46                  | 0.0868 | v2v3v4  |
| rs9350100   | FALSE | FALSE | FALSE |         |                       |                      |        | 0.9960   | 0.9903   | 0.72                  | 0.8075 | v2v3v4  |
| rs2282752   | FALSE | FALSE | FALSE |         |                       |                      |        | 0.9688   | 0.9647   | 0.21                  | 0.8463 | v2v3v4  |
| rs6681737   | FALSE | FALSE | FALSE |         |                       |                      |        | 0.9782   | 0.9740   | 0.61                  | 0.5562 | v2v3v4  |
| rs148707903 | FALSE | FALSE | FALSE |         |                       |                      |        | 0.6969   | 0.3285   | $3.5 \times 10^{-10}$ | 0.0012 | v2v3v4  |

## SNP Statistics in the GWAS Sample

| assay.name  | AA.0 | AB.0  | BB.0  | im.num.0 | dose.b.0 |
|-------------|------|-------|-------|----------|----------|
| rs9391253   |      |       |       | 55871    | 0.3191   |
| rs246185    | 4789 | 18088 | 18949 | 55871    | 0.6750   |
| rs7110373   |      |       |       | 55871    | 0.5075   |
| rs140410685 |      |       |       | 55871    | 0.8161   |
| rs9408817   |      |       |       | 55871    | 0.6745   |
| rs5932886   |      |       |       | 55871    | 0.8176   |
| rs5978985   |      |       |       | 55871    | 0.4991   |
| rs35327298  |      |       |       | 55871    | 0.9897   |
| rs142058842 |      |       |       | 55871    | 0.1714   |
| rs10980922  |      |       |       | 55871    | 0.0860   |
| rs9350100   |      |       |       | 55871    | 0.8089   |
| rs2282752   |      |       |       | 55871    | 0.8461   |
| rs6681737   |      |       |       | 55871    | 0.5560   |
| rs148707903 |      |       |       | 55871    | 0.0011   |

## Annotations from NHGRI GWAS Catalog

The following table shows, for each index SNP, all entries in the NHGRI GWAS Catalog that are within 500kb and in at least moderate linkage disequilibrium ( $r^2 > 0.5$ ).

| region   | position  | our.name    | our.pval              | dist    | rsqr  | assay.name | pvalue                | pubmed.id | trait                                                                   | genes                 |
|----------|-----------|-------------|-----------------------|---------|-------|------------|-----------------------|-----------|-------------------------------------------------------------------------|-----------------------|
| 6q16.3   | 105367616 | rs9391253   | $1.2 \times 10^{-23}$ | 0       | 1.000 | rs9391253  | $5.0 \times 10^{-12}$ | 23563607  | Height                                                                  | LIN28B                |
| 6q16.3   | 105367616 | rs9391253   | $1.2 \times 10^{-23}$ | 11338   | 0.988 | rs7759938  | $4.0 \times 10^{-9}$  | 23449627  | Pubertal anthropometrics                                                | LIN28B                |
| 6q16.3   | 105367616 | rs9391253   | $1.2 \times 10^{-23}$ | 11338   | 0.988 | rs7759938  | $5.0 \times 10^{-60}$ | 21102462  | Menarche (age at onset)                                                 | LIN28B                |
| 6q16.3   | 105367616 | rs9391253   | $1.2 \times 10^{-23}$ | 11338   | 0.988 | rs7759938  | $8.0 \times 10^{-31}$ | 20881960  | Height                                                                  | LIN28B                |
| 6q16.3   | 105367616 | rs9391253   | $1.2 \times 10^{-23}$ | 11338   | 0.988 | rs7759938  | $7.0 \times 10^{-9}$  | 19448620  | Menarche (age at onset)                                                 | LIN28B                |
| 6q16.3   | 105367616 | rs9391253   | $1.2 \times 10^{-23}$ | 33221   | 0.588 | rs314280   | $2.0 \times 10^{-14}$ | 19448622  | Menarche (age at onset)                                                 | LIN28B, HACE1, ...    |
| 6q16.3   | 105367616 | rs9391253   | $1.2 \times 10^{-23}$ | 40383   | 0.960 | rs314276   | $4.0 \times 10^{-16}$ | 19448623  | Menarche (age at onset)                                                 | LIN28B                |
| 6q16.3   | 105367616 | rs9391253   | $1.2 \times 10^{-23}$ | 50362   | 0.960 | rs314268   | $8.0 \times 10^{-7}$  | 18391951  | Height                                                                  | LIN28B, HACE1, ...    |
| 6q16.3   | 105367616 | rs9391253   | $1.2 \times 10^{-23}$ | 75573   | 0.654 | rs364663   | $5.0 \times 10^{-7}$  | 23667675  | Menarche (age at onset)                                                 | LIN28B                |
| 16p13.12 | 14395432  | rs246185    | $7.1 \times 10^{-14}$ | -7127   | 0.870 | rs1659127  | $4.0 \times 10^{-9}$  | 21102462  | Menarche (age at onset)                                                 | MKL2                  |
| 16p13.12 | 14395432  | rs246185    | $7.1 \times 10^{-14}$ | -7127   | 0.870 | rs1659127  | $1.0 \times 10^{-11}$ | 20881960  | Height                                                                  | MKL2                  |
| 1p31.3   | 66118329  | rs140410685 | $1.0 \times 10^{-10}$ | -125704 | 0.548 | rs1751492  | $6.0 \times 10^{-13}$ | 20167575  | Soluble leptin receptor levels<br>Menarche and menopause (age at onset) | LEPR                  |
| 9q31.2   | 108911979 | rs9408817   | $1.8 \times 10^{-10}$ | 24695   | 0.528 | rs7861820  | $3.0 \times 10^{-9}$  | 19448621  | Intergenic                                                              |                       |
| 9q31.2   | 108911979 | rs9408817   | $1.8 \times 10^{-10}$ | 55109   | 0.929 | rs2090409  | $2.0 \times 10^{-6}$  | 23449627  | Pubertal anthropometrics                                                | TMEM38B               |
| 9q31.2   | 108911979 | rs9408817   | $1.8 \times 10^{-10}$ | 55109   | 0.929 | rs2090409  | $2.0 \times 10^{-33}$ | 21102462  | Menarche (age at onset)                                                 | TMEM38B               |
| 9q31.2   | 108911979 | rs9408817   | $1.8 \times 10^{-10}$ | 55109   | 0.929 | rs2090409  | $2.0 \times 10^{-9}$  | 19448620  | Menarche (age at onset)                                                 | TMEM38B, SLC44A1, ... |
| 9q31.3   | 114280868 | rs10980922  | $1.3 \times 10^{-7}$  | 22811   | 0.664 | rs7873730  | $2.0 \times 10^{-6}$  | 23599027  | Menarche (age at onset)                                                 | ZNF483                |

## Replication of GWAS Catalog Results

The following table shows, for each GWAS Catalog result for similar traits, our association test result for our best available proxy (distance < 100kb,  $r^2 > 0.8$ ).

*no relevant GWAS catalog terms were available*

## Nearby Nonsynonymous SNPs

| region  | position | our.name    | our.pval              | dist   | rsqr  | assay.name | gene    | aa.chg |
|---------|----------|-------------|-----------------------|--------|-------|------------|---------|--------|
| 1p31.3  | 66118329 | rs140410685 | $1.0 \times 10^{-10}$ | -81888 | 0.598 | rs1137100  | LEPR    | K109R  |
| 2p13.1  | 73540044 | rs35327298  | $1.1 \times 10^{-8}$  | 259588 | 1.000 | rs45501594 | ALMS1   | T3542S |
| 3p21.31 | 50433967 | rs2282752   | $3.6 \times 10^{-7}$  | 163125 | 0.551 | rs1034405  | C3orf18 | A162V  |

## Nearby Expression QTLs

| region  | position  | our.name  | our.pval              | dist   | rsqr  | assay.name | eqli.dist | eqli.gene | eqli.pval             | eqli.rsqr | tissue         | pubmed.id |
|---------|-----------|-----------|-----------------------|--------|-------|------------|-----------|-----------|-----------------------|-----------|----------------|-----------|
| 11q24.1 | 122813224 | rs7110373 | $1.7 \times 10^{-13}$ | 34613  | 0.593 | rs6589963  | 999566    | OR10S1    | 0.00013               | 0.183     | T-cell         | 19644074  |
| 3p21.31 | 50433967  | rs2282752 | $3.6 \times 10^{-7}$  | 140246 | 0.662 | rs398703   | 21600     | C3ORF18   | 0.00021               | 0.048     | Monocyte       | 22446964  |
| 3p21.31 | 50433967  | rs2282752 | $3.6 \times 10^{-7}$  | 150661 | 0.630 | rs2232248  | 12591     | HEMK1     | $1.5 \times 10^{-7}$  | 0.120     | Lymphoblastoid | 17873874  |
| 3p21.31 | 50433967  | rs2282752 | $3.6 \times 10^{-7}$  | 223859 | 0.540 | rs375544   | 28806     | MAPKAPK3  | $2.3 \times 10^{-10}$ | 0.134     | Monocyte       | 22446964  |
| 3p21.31 | 50433967  | rs2282752 | $3.6 \times 10^{-7}$  | 285378 | 0.533 | rs6779819  | 32626     | MAPKAPK3  | $1.5 \times 10^{-16}$ | 0.045     | Monocyte       | 20502693  |

## Nearby Clinical Variants

| source  | region  | our.name    | our.pval              | dist   | rsqr  | assay.name | gene | phenotype                                     | accession     |
|---------|---------|-------------|-----------------------|--------|-------|------------|------|-----------------------------------------------|---------------|
| clinvar | 1p31.3  | rs140410685 | $1.0 \times 10^{-10}$ | -81888 | 0.598 | rs1137100  | LEPR | Leptin receptor deficiency                    | NCBI curation |
| clinvar | 3p21.31 | rs2282752   | $3.6 \times 10^{-7}$  | 215532 | 0.532 | rs414171   | CISH | Mycobacterium tuberculosis, susceptibility to | NCBI curation |
| clinvar | 3p21.31 | rs2282752   | $3.6 \times 10^{-7}$  | 215532 | 0.532 | rs414171   | CISH | Susceptibility to malaria                     | NCBI curation |
| clinvar | 3p21.31 | rs2282752   | $3.6 \times 10^{-7}$  | 215532 | 0.532 | rs414171   | CISH | Bacteremia, susceptibility to, 2              | NCBI curation |

## Regional Association Plots

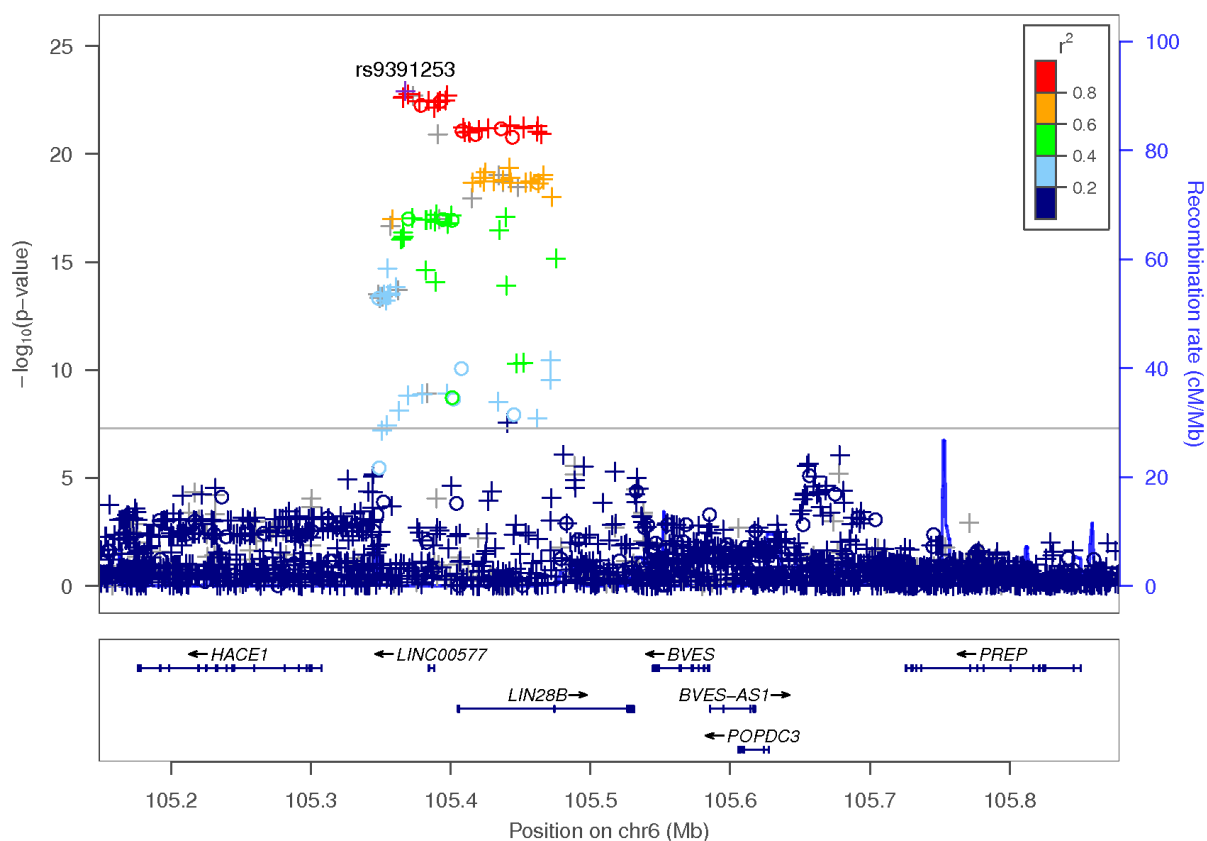

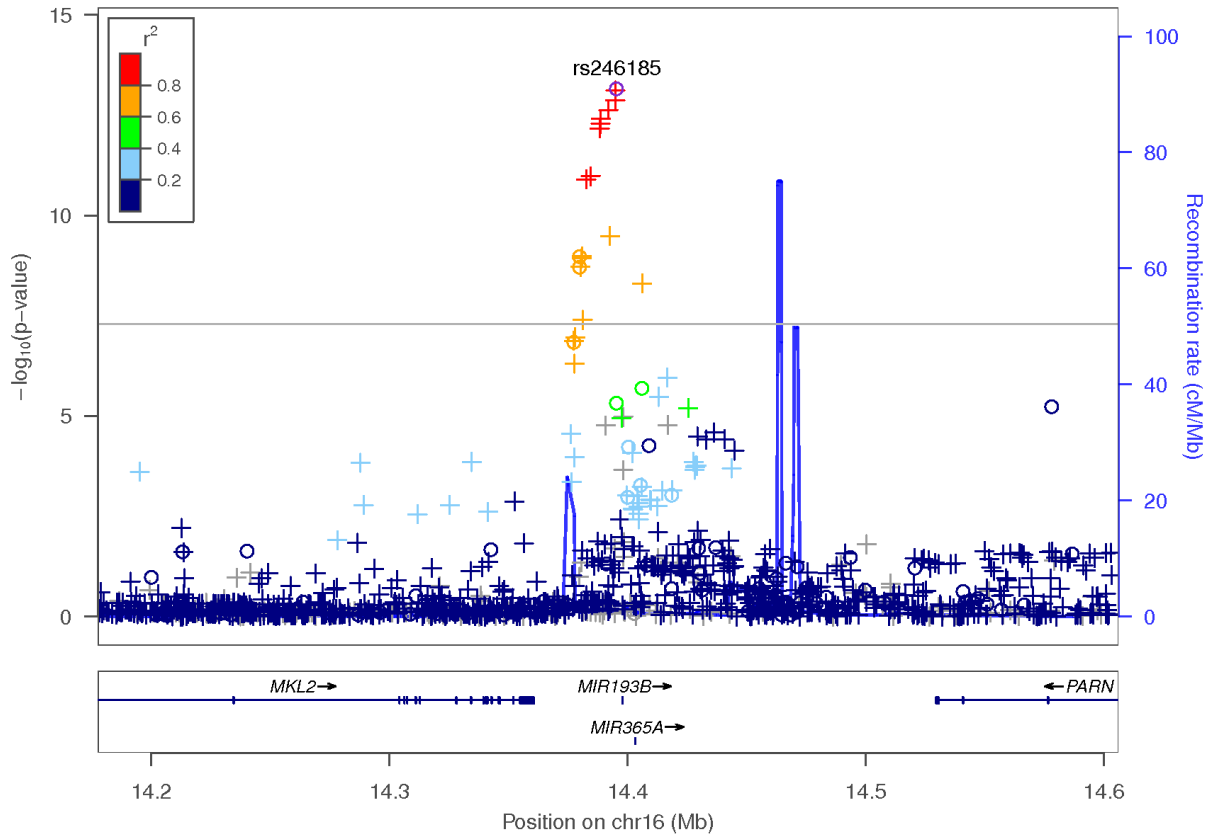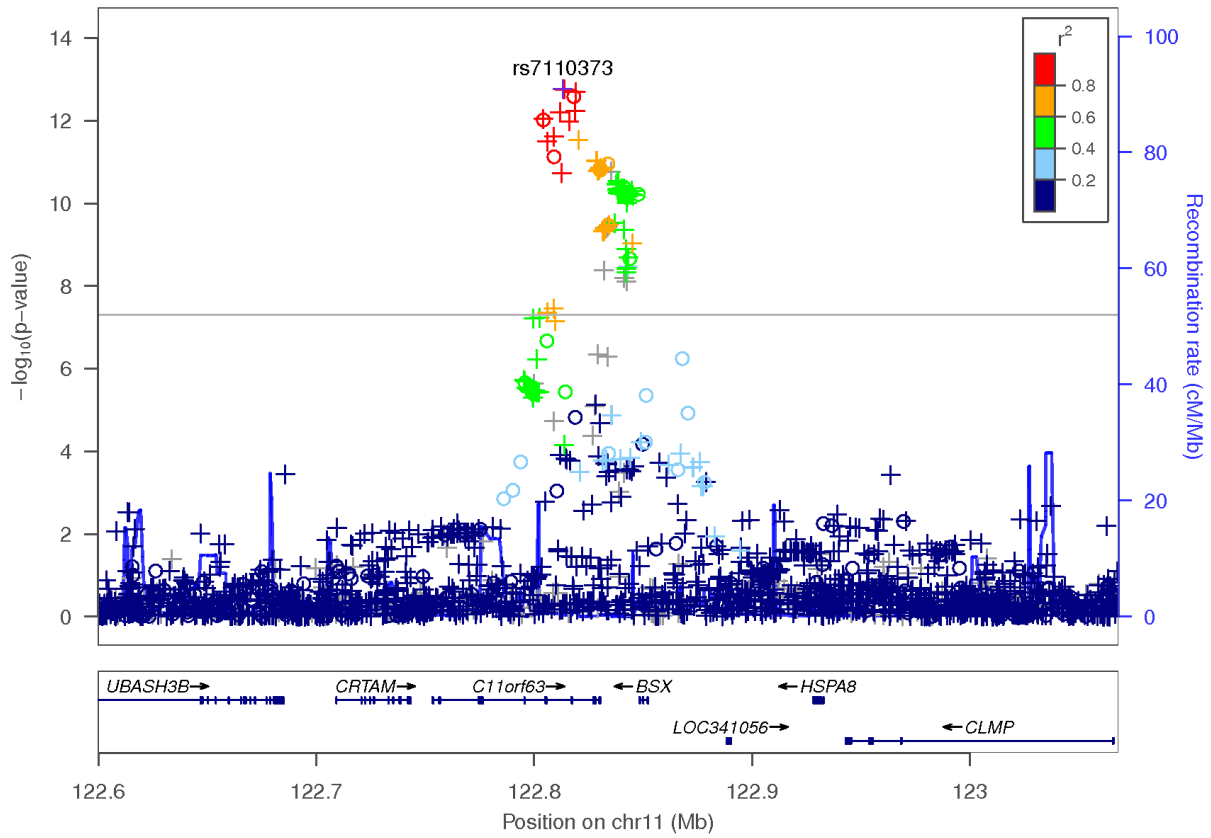

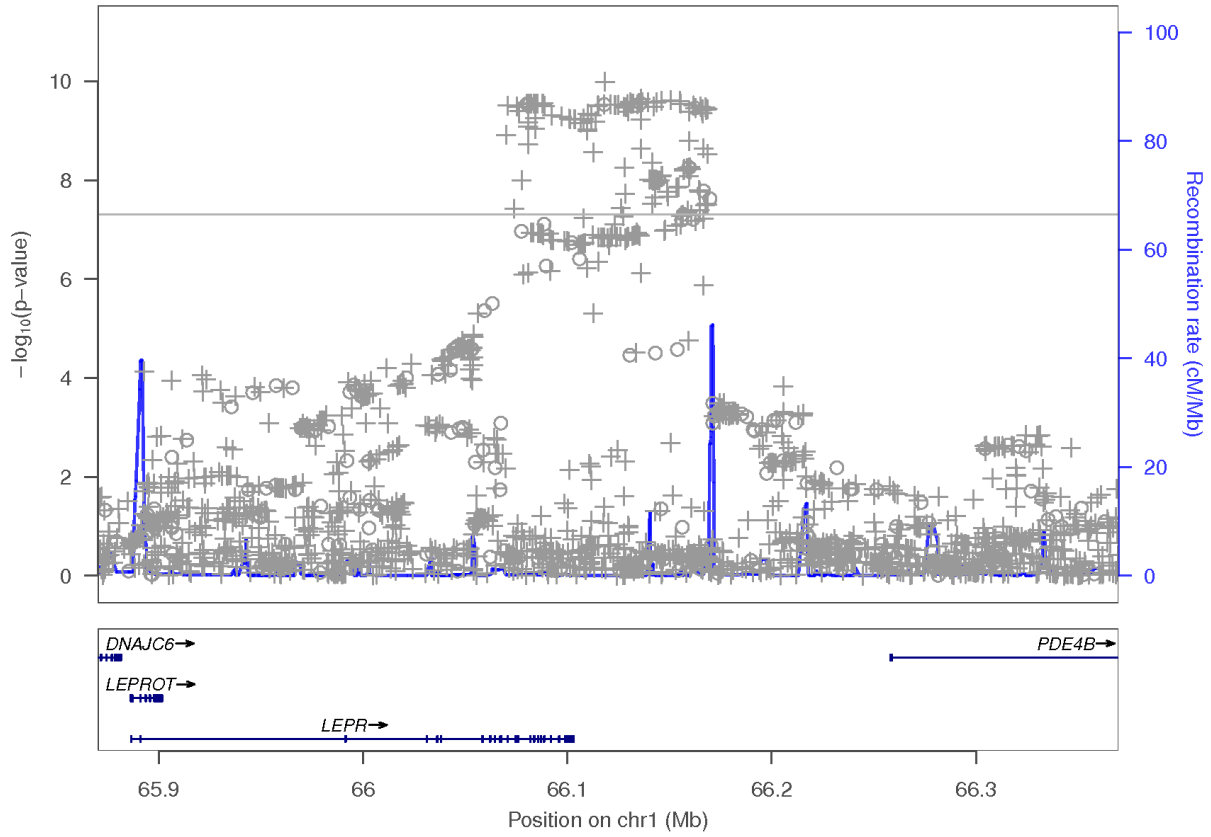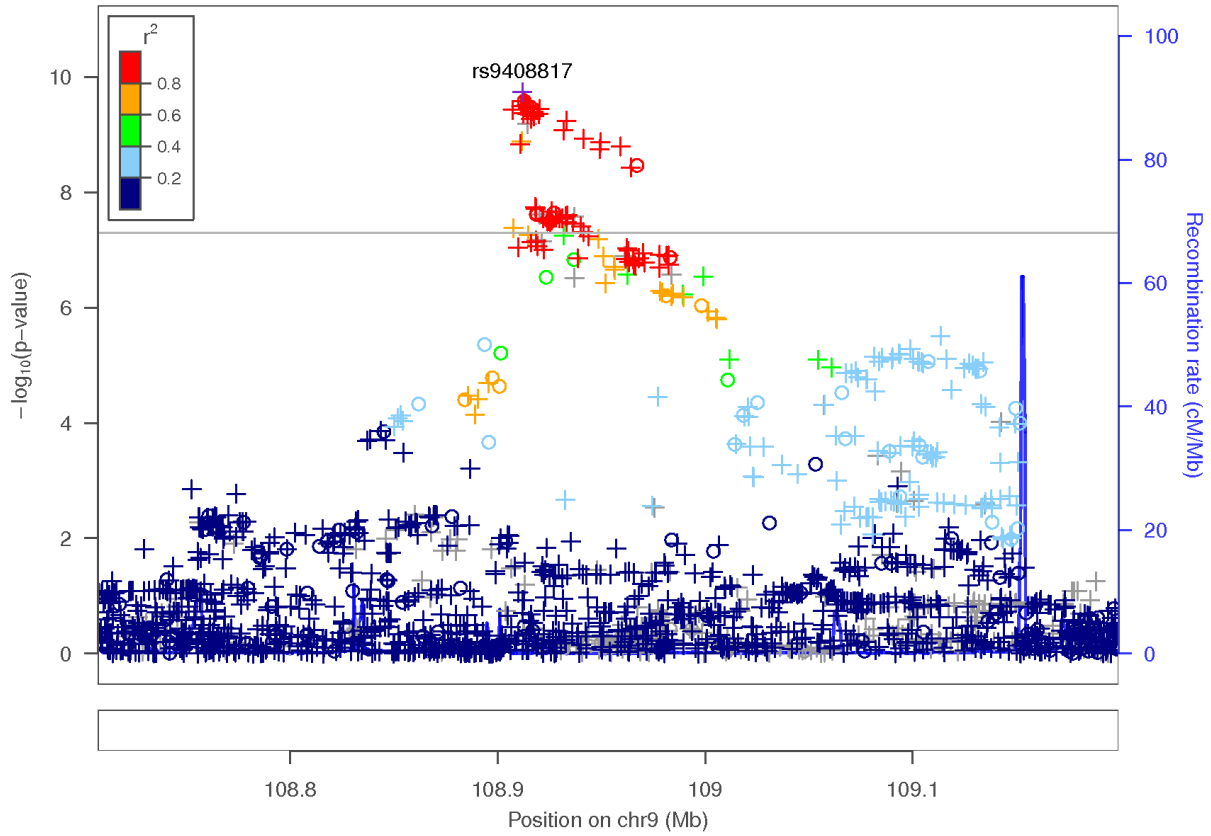

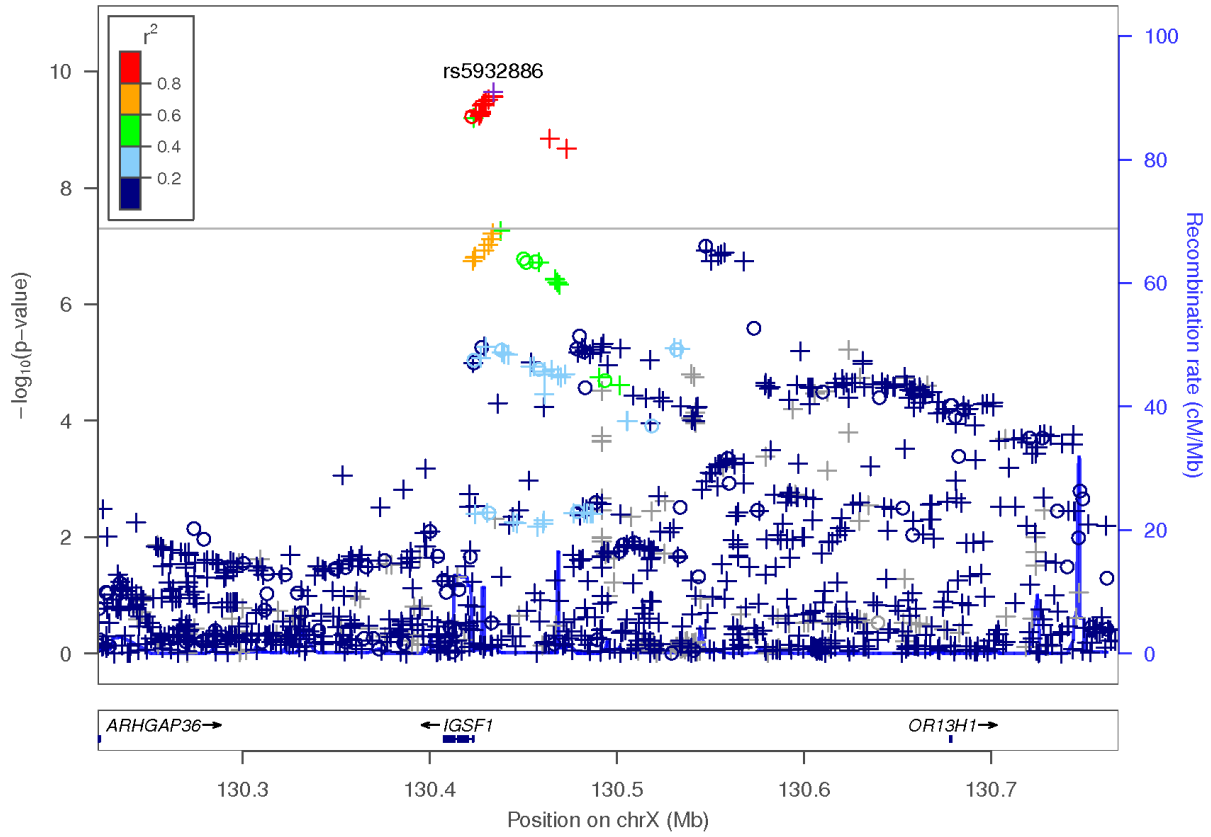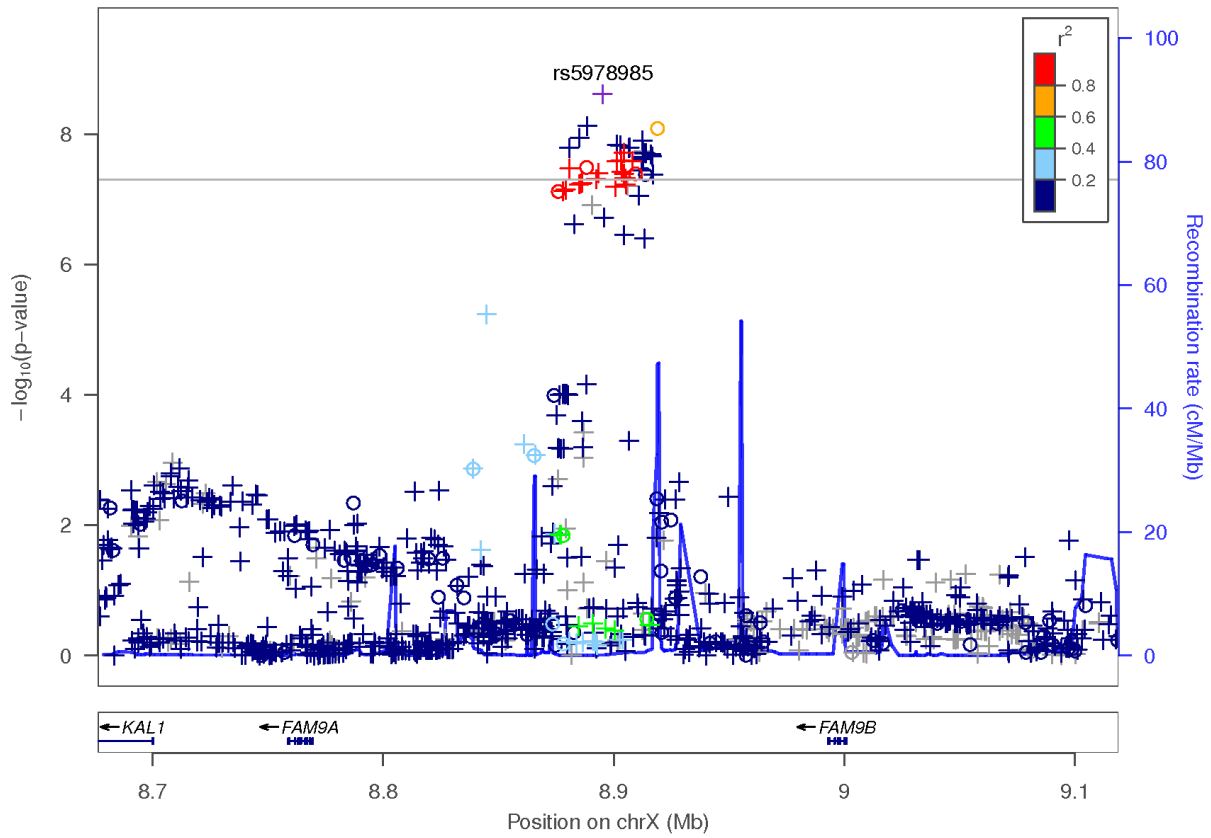



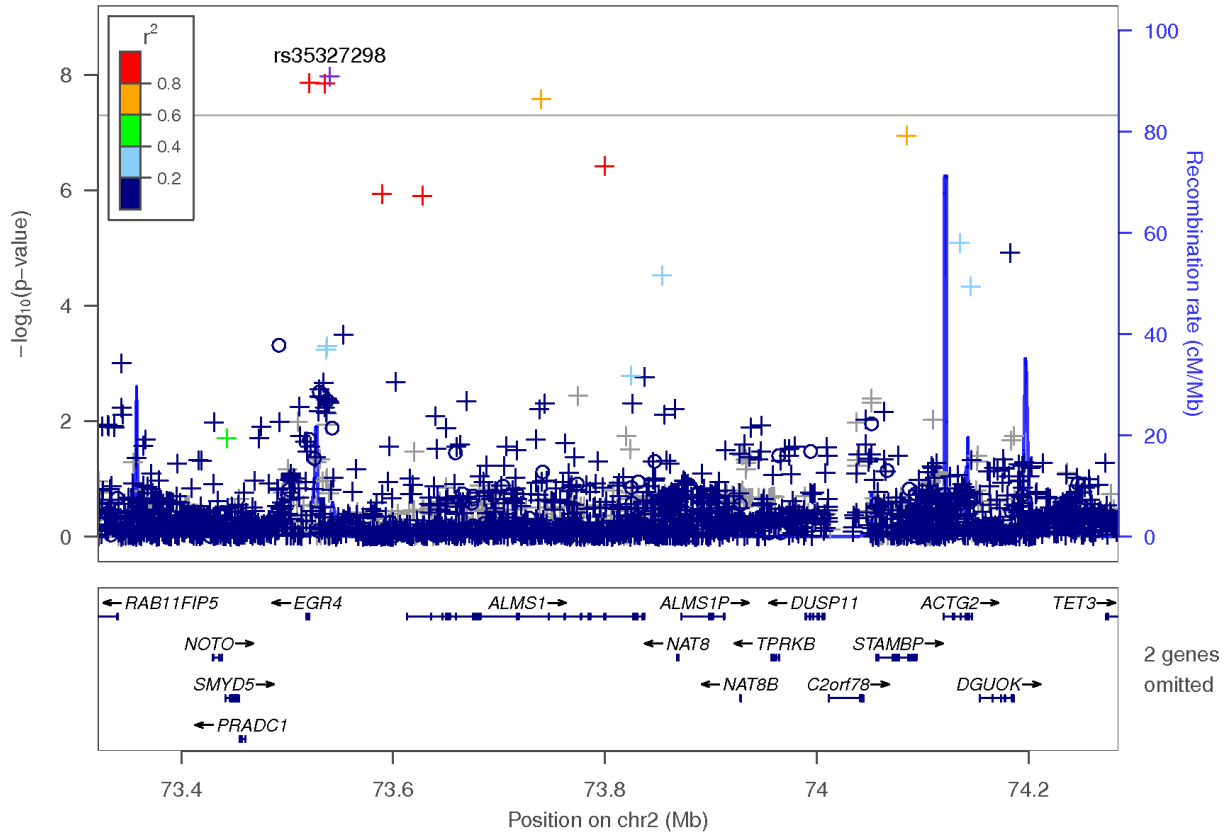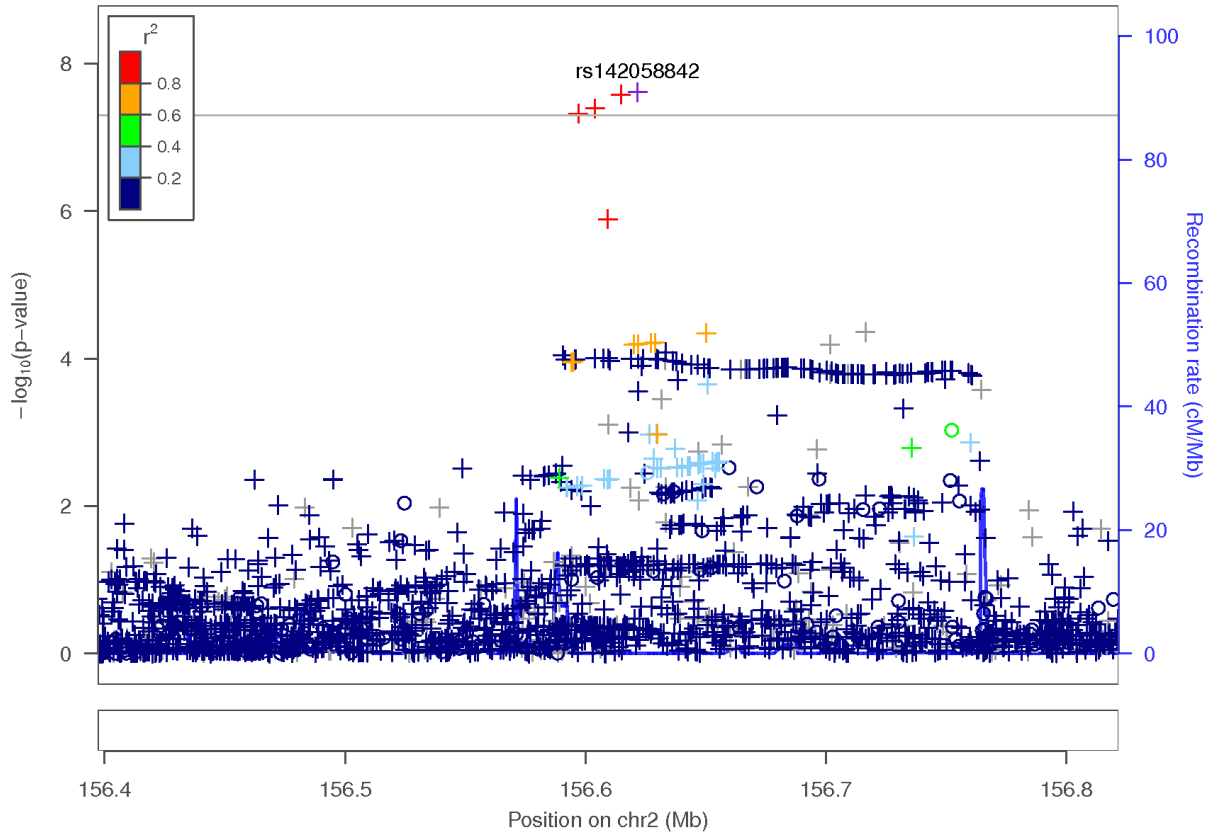

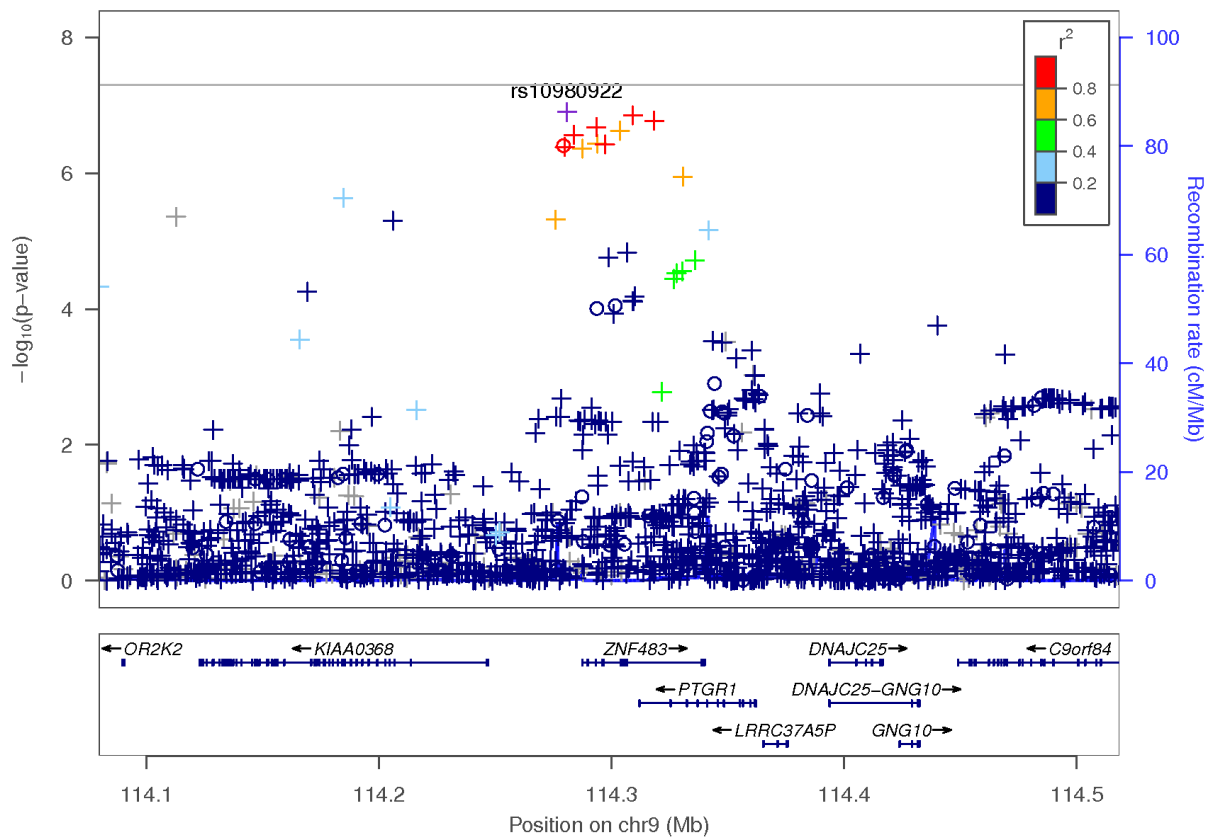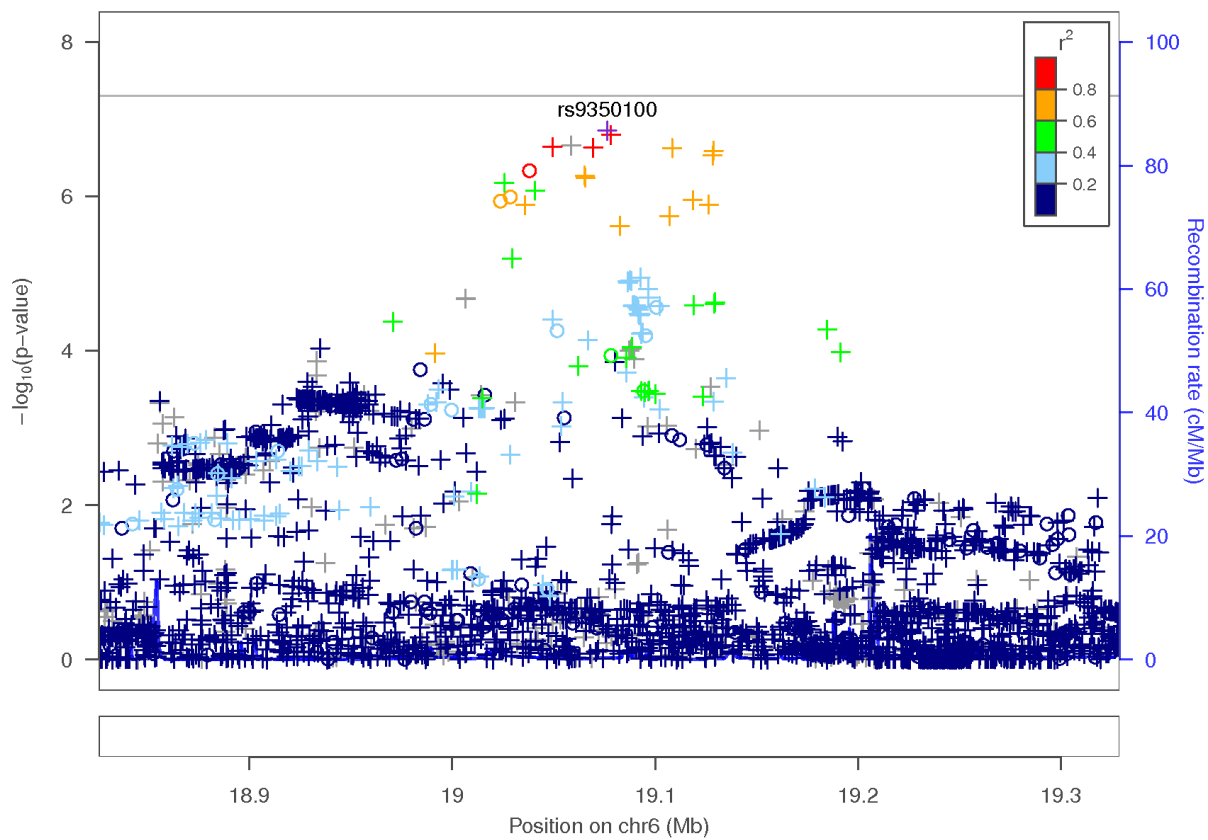

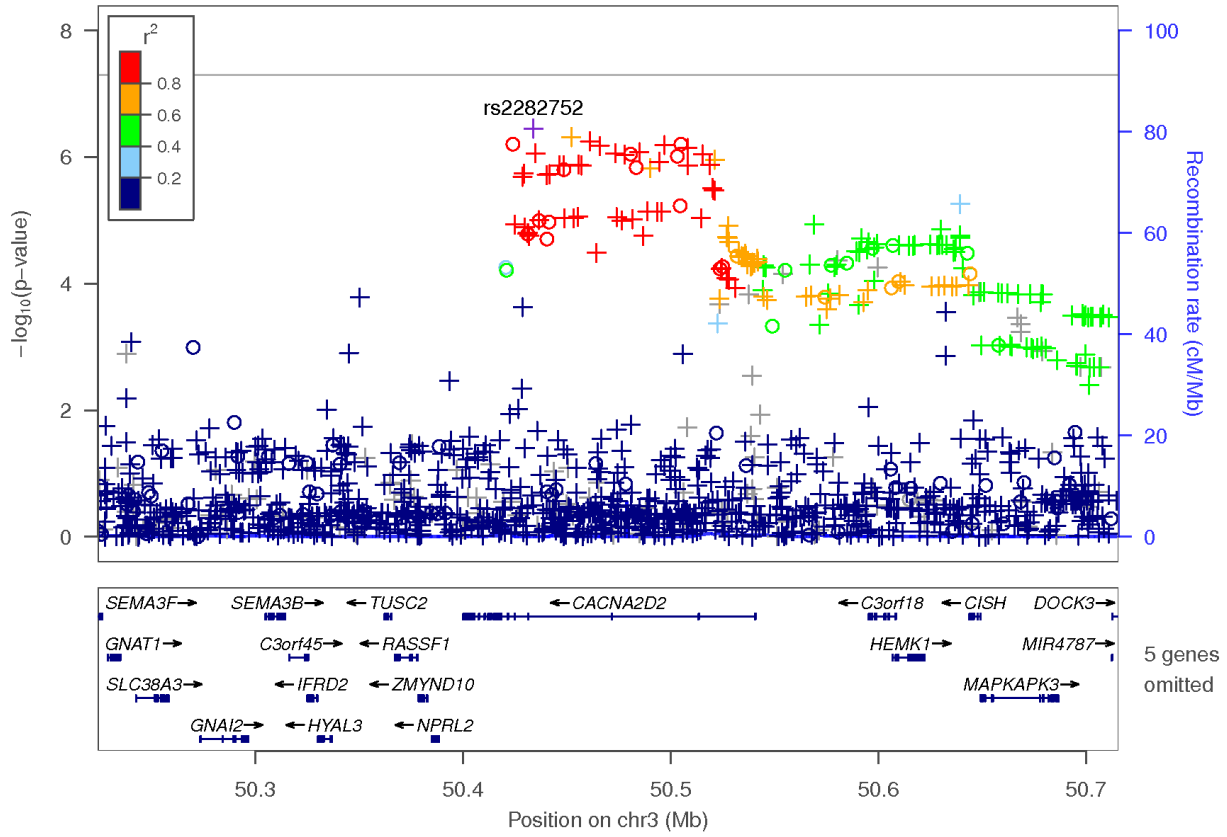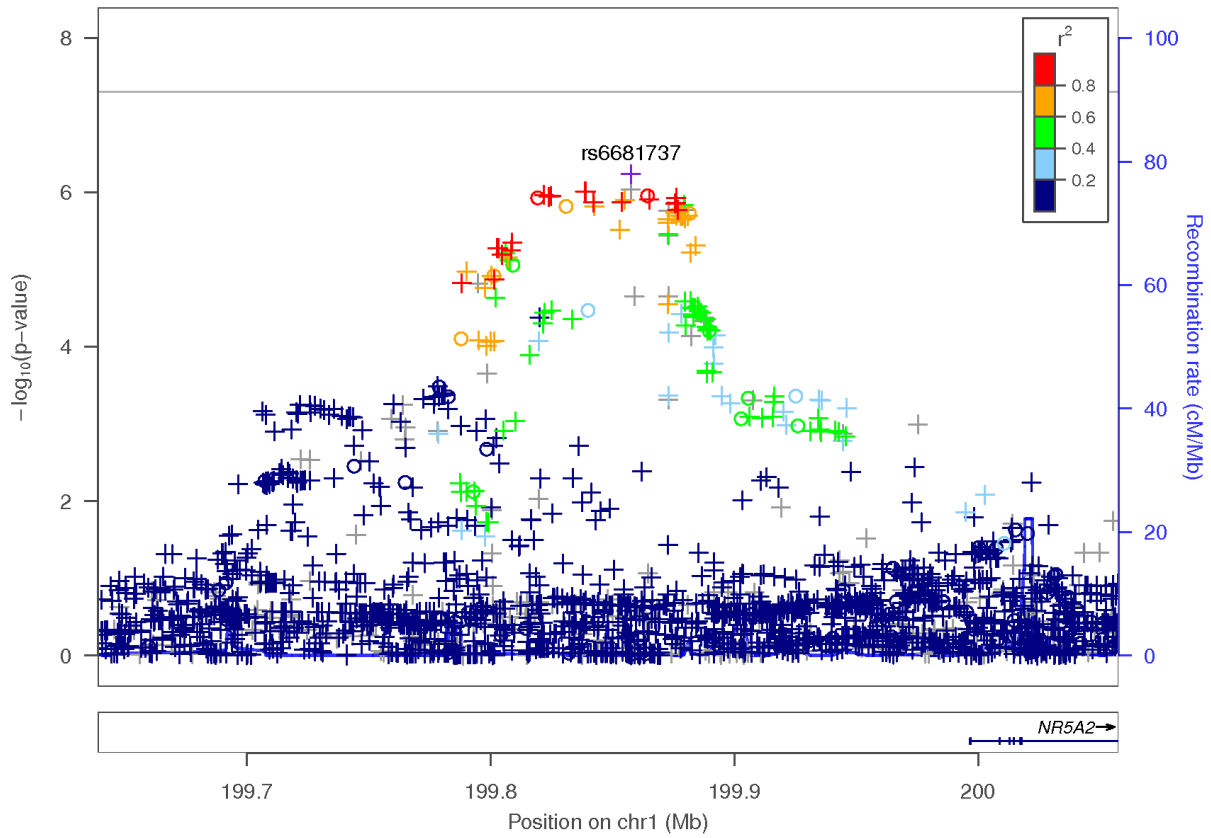

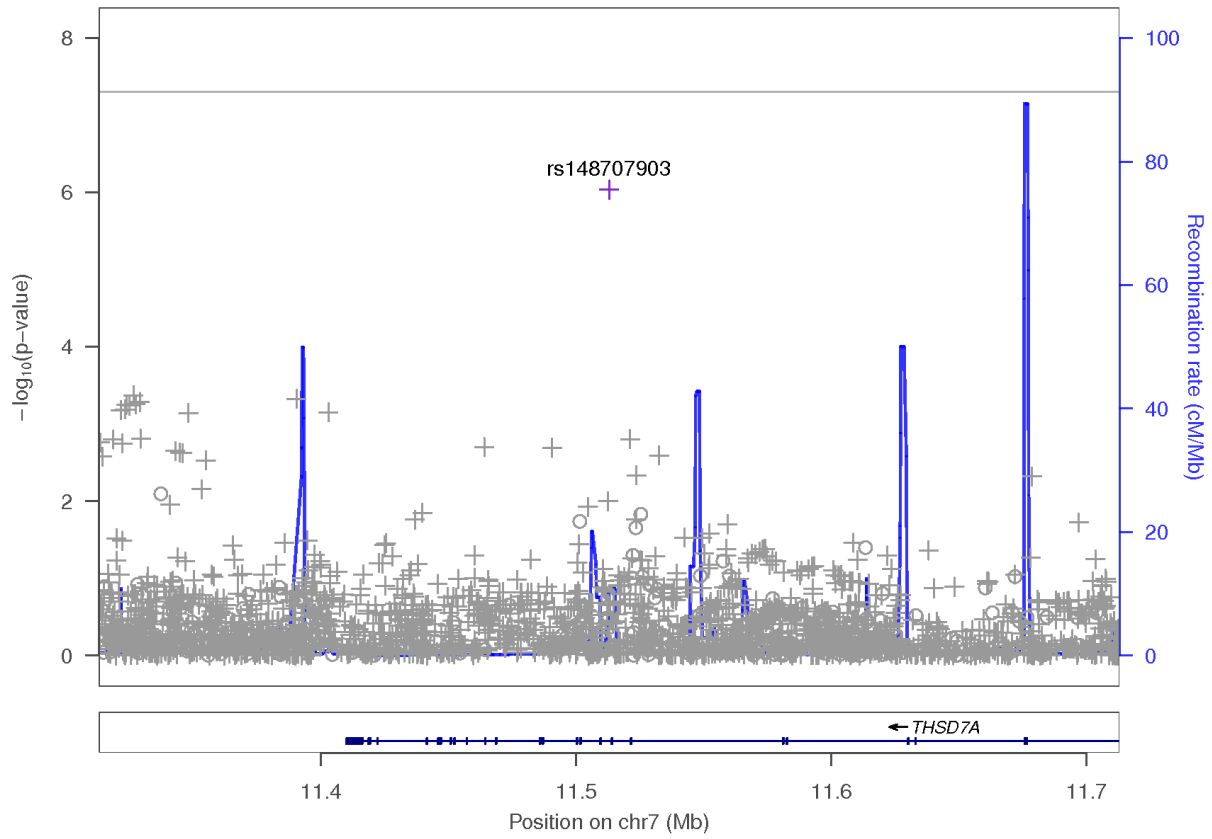

Supplement: NIHMS780506-supplement-4.pdf [file NIHMS780506-supplement-4.pdf]
