# Supplementary material
Source: PubMed Central journal article supplement (PMC5207801)

# Analysis Summary: Any Allergy

## Phenotype Description

The "any\_allergy" phenotype includes cases identified from the union of the following sources:

- "Allergies and Asthma" survey:
  - An allergic reaction (with either a positive allergy test, or with specific allergy symptoms) to any of the following:
    - Foods: chicken, eggs, milk, shellfish, fish, oats, peanut, soy, tree nuts, wheat, other
    - Plants: trees, weeds, grasses, other
    - Animals: cat, dog, other
    - Drugs: penicillin, sulfa drug, mycin drug, aspirin
    - Other: dust mites, mold, latex
- Your Medical History survey:
  - "Have you ever been diagnosed by a doctor with any of the following types of *allergies*?" (Seasonal allergy: Yes, No, I don't know)
- Either "Allergies and Asthma" or Asthma survey:
  - Allergic asthma cases (an asthma diagnosis with allergic trigger)

We identified controls that reported having no allergies of any kind, based on information from many sources. A control had to provide at least one negative response and no positive responses to any of these questions:

- "Your Health Profile" survey
  - "Have you ever been diagnosed by a doctor with any of the following types of *allergies*?" (Yes, No, I'm not sure)
    - Seasonal allergies
    - Asthma
    - Environmental (but not seasonal) allergy
    - Food allergy
    - Drug allergy
- "Asthma Symptoms" survey
  - "Have you ever been diagnosed by a doctor with asthma or bronchial asthma?" (Yes, No, I'm not sure)
  - "Do you currently have allergies?" (Yes, No, I'm not sure)
  - "Have you ever had any of the following? Please check all that apply."
    - Positive allergen skin prick test or positive allergen blood test
    - Atopic dermatitis/Eczema (chronic itchy and scaly skin rashes caused by allergies)
    - Allergic rhinitis (stuffed or dripping nose caused by allergies)
    - Allergic conjunctivitis (red, itchy, or painful eyes caused by allergies)
- "Allergies and Asthma" survey
  - Questions about a total of 38 allergens, including foods, plants, animals, molds, latex, medicines, vaccines, and other
  - "Have you ever had an asthma attack?" (Yes, No, I'm not sure)

## Phenotype Statistics

The following table shows demographics of unrelated, European individuals included in the GWAS.

| Phenotype   | Group   | Total  | M     | F     | (0,30] | (30,45] | (45,60] | (60,Inf] |
|-------------|---------|--------|-------|-------|--------|---------|---------|----------|
| any_allergy | case    | 66973  | 32632 | 34341 | 9019   | 19985   | 18498   | 19471    |
|             | control | 113768 | 65619 | 48149 | 16330  | 32255   | 30626   | 34557    |

The following table shows the phenotypic distribution across 23andMe genotyping platforms for individuals included in the GWAS.

| Phenotype   | Group   | Total  | v1/v2 | v3    | v4    |
|-------------|---------|--------|-------|-------|-------|
| any_allergy | case    | 66973  | 7913  | 50747 | 8313  |
|             | control | 113768 | 6231  | 78553 | 28984 |

## Null Model with Covariates

The following table shows results of fitting a model for the trait based on just the covariates. Principal coordinates have been standardized, so these effect sizes are in units of standard deviations.

|      | Estimate  | Std. Error | z value | Pr(> z )               | LRT    | Pr(>Chi)               |
|------|-----------|------------|---------|------------------------|--------|------------------------|
| age  | -0.002544 | 0.00030    | -8.5    | $2.3 \times 10^{-17}$  | 71.9   | $2.2 \times 10^{-17}$  |
| sexF | 0.359546  | 0.00982    | 36.6    | $1.6 \times 10^{-293}$ | 1343.7 | $3.6 \times 10^{-294}$ |
| pc.0 | 0.051553  | 0.00498    | 10.3    | $4.5 \times 10^{-25}$  | 108.4  | $2.2 \times 10^{-25}$  |
| pc.1 | -0.101442 | 0.00510    | -19.9   | $6.5 \times 10^{-88}$  | 406.5  | $2.1 \times 10^{-90}$  |
| pc.2 | -0.064178 | 0.00503    | -12.8   | $3.0 \times 10^{-37}$  | 164.4  | $1.2 \times 10^{-37}$  |
| pc.3 | 0.025595  | 0.00490    | 5.2     | $1.7 \times 10^{-7}$   | 27.3   | $1.7 \times 10^{-7}$   |
| pc.4 | 0.000556  | 0.00492    | 0.1     | 0.91                   | 0.0    | 0.91                   |

## SNP-level QC information

The following table shows results for QC filters on the genotyped data:

|                            | failed | passed  |
|----------------------------|--------|---------|
| no filters                 | 0      | 1030430 |
| not V1/V2-only, chrM, chrY | 33033  | 997397  |
| parent-offspring test      | 2129   | 995294  |
| MAF > 0%                   | 3203   | 992310  |
| HWE > 1e-20                | 48225  | 945039  |
| gt.rate > 90%              | 30775  | 925423  |
| batch effects              | 67182  | 893121  |

The following table shows results for QC filters on the imputed dosage data:

|                    | failed | passed   |
|--------------------|--------|----------|
| no filters         | 0      | 13733809 |
| MAF > 0%           | 0      | 13733809 |
| imputation quality | 0      | 13733809 |
| batch effects      | 954316 | 12779493 |

The following table shows results for QC filters on the merged association test results:

|                    | passed   | total    |
|--------------------|----------|----------|
| imputed only       | 11972464 | 11972464 |
| both passed        | 807014   | 12779478 |
| genotyped only     | 86107    | 12865585 |
| no test result     | -5276    | 12860309 |
| failed to converge | -14399   | 12845910 |

## Genetic Association Tests

We performed logistic regression assuming an additive model for allelic effects, using the model:

$$any\_allergy \sim age + sex + pc.0 + pc.1 + pc.2 + pc.3 + pc.4 + genotype$$

This genome-wide association analysis includes data from 66973 cases and 113768 controls of European ancestry, filtered to remove close relatives.

The results in this report have been adjusted for a genomic control inflation factor  $\lambda=1.210$ . The equivalent inflation factor for 1000 cases and 1000 controls  $\lambda_{1000}=1.002$ , and for 10000,  $\lambda_{10000}=1.025$ .

## Manhattan Plot

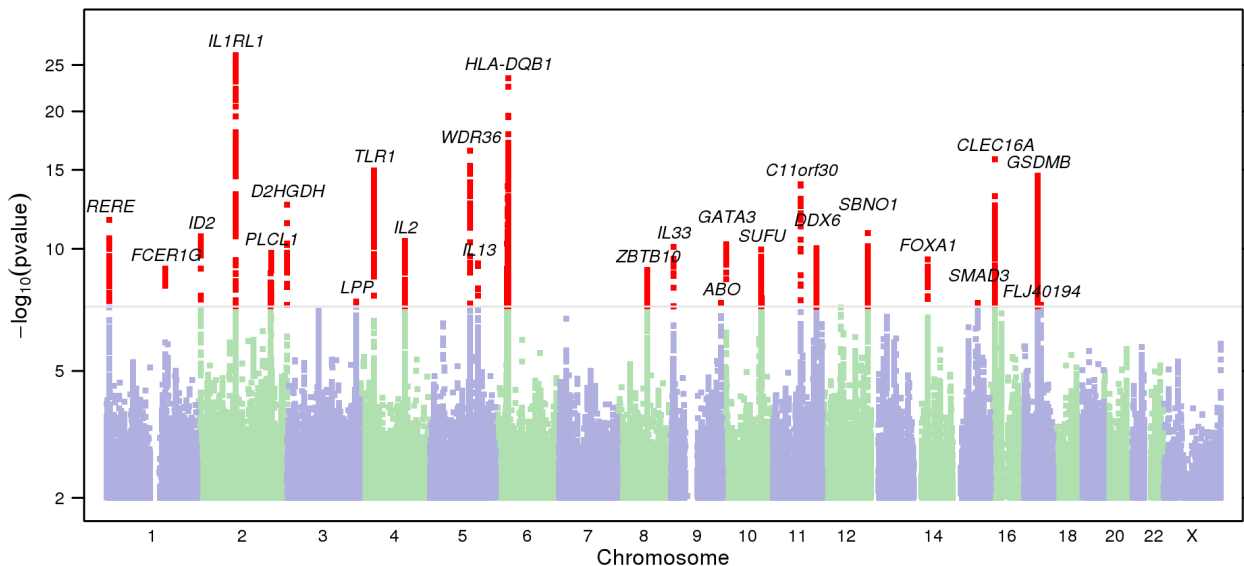

## Q-Q Plot of GWAS Results

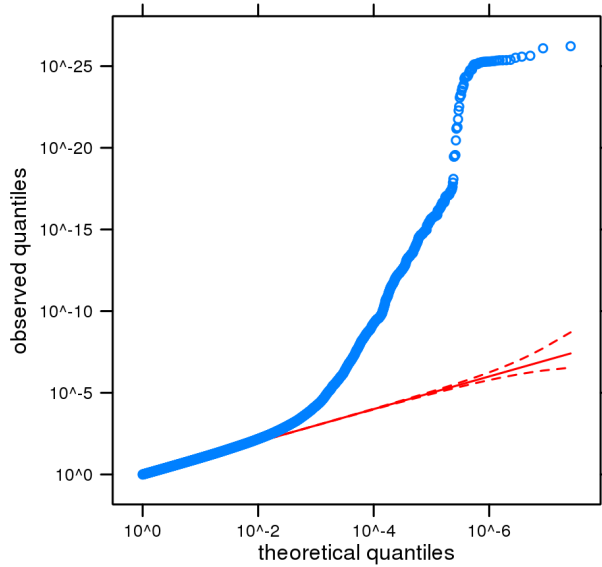

## Index SNPs for Strongest Associations

| cytoband | assay.name  | scaffold | position  | alleles | src | pvalue                | OR    | 95% CI        | gene.context         |
|----------|-------------|----------|-----------|---------|-----|-----------------------|-------|---------------|----------------------|
| 2q12.1   | rs950881    | chr2     | 102932512 | G/T     | I   | $6.0 \times 10^{-27}$ | 0.890 | [0.871,0.909] | [IL1RL1]             |
| 6p21.32  | rs34004019  | chr6     | 32626403  | A/G     | I   | $3.2 \times 10^{-24}$ | 0.902 | [0.884,0.920] | HLA-DQA1--[HLA-DQB1] |
| 5q22.1   | rs1438673   | chr5     | 110467499 | C/T     | I   | $3.2 \times 10^{-17}$ | 0.937 | [0.923,0.951] | WDR36--[CAMK4]       |
| 16p13.13 | rs11644510  | chr16    | 11277358  | C/T     | I   | $1.5 \times 10^{-16}$ | 0.934 | [0.920,0.950] | CLEC16A--[SOCS1]     |
| 4p14     | rs11727978  | chr4     | 38811051  | A/T     | I   | $1.1 \times 10^{-15}$ | 1.083 | [1.062,1.104] | TLR1--[TLR6]         |
| 17q12    | rs4795400   | chr17    | 38067020  | C/T     | I   | $2.8 \times 10^{-15}$ | 0.941 | [0.927,0.955] | [GSDMB]              |
| 11q13.5  | rs7936323   | chr11    | 76293758  | A/G     | I   | $1.1 \times 10^{-14}$ | 0.943 | [0.929,0.957] | C11orf30--[LRRC32]   |
| 2q37.3   | rs35061832  | chr2     | 242692490 | C/T     | I   | $2.8 \times 10^{-13}$ | 1.100 | [1.073,1.129] | [D2HGDH]             |
| 1p36.23  | rs4908769   | chr1     | 8701288   | C/T     | I   | $2.3 \times 10^{-12}$ | 1.061 | [1.044,1.079] | [RERE]               |
| 12q24.31 | rs9739070   | chr12    | 123771032 | A/G     | I   | $1.3 \times 10^{-11}$ | 1.067 | [1.047,1.087] | CDK2AP1--[SBNO1]     |
| 2p25.1   | rs367023    | chr2     | 8450123   | A/G     | I   | $2.1 \times 10^{-11}$ | 0.945 | [0.929,0.960] | [---ID2]             |
| 4q27     | rs148505069 | chr4     | 123417564 | A/G     | I   | $3.8 \times 10^{-11}$ | 1.056 | [1.039,1.073] | IL2--[---IL21]       |
| 10p14    | rs1775550   | chr10    | 9052742   | A/G     | I   | $5.6 \times 10^{-11}$ | 1.067 | [1.047,1.088] | GATA3--[---]         |
| 9p24.1   | rs10975488  | chr9     | 6213829   | A/G     | I   | $7.7 \times 10^{-11}$ | 1.087 | [1.060,1.115] | RANBP6--[---IL33]    |
| 11q23.3  | rs11217036  | chr11    | 118675772 | C/T     | I   | $9.3 \times 10^{-11}$ | 0.939 | [0.921,0.957] | DDX6--[---CXCR5]     |
| 10q24.32 | rs201333164 | chr10    | 104278261 | D/I     | I   | $1.1 \times 10^{-10}$ | 1.062 | [1.042,1.081] | [SUFU]               |
| 2q33.1   | rs2164068   | chr2     | 198943852 | A/T     | I   | $1.6 \times 10^{-10}$ | 1.051 | [1.035,1.067] | [PLCL1]              |
| 14q21.1  | rs61977073  | chr14    | 38151255  | A/G     | I   | $3.5 \times 10^{-10}$ | 1.061 | [1.041,1.080] | FOXA1--[---TTC6]     |
| 5q31.1   | rs1295686   | chr5     | 131995843 | C/T     | I   | $5.5 \times 10^{-10}$ | 1.061 | [1.041,1.080] | [IL13]               |
| 1q23.3   | rs2070902   | chr1     | 161187665 | C/T     | I   | $1.0 \times 10^{-9}$  | 1.055 | [1.037,1.073] | [FCER1G]             |
| 8q21.13  | rs7824394   | chr8     | 81292599  | A/C     | I   | $1.2 \times 10^{-9}$  | 0.952 | [0.938,0.967] | TPD52--[---ZBTB10]   |
| 3q28     | rs2030519   | chr3     | 188119901 | A/G     | I   | $3.1 \times 10^{-8}$  | 1.043 | [1.028,1.059] | [LPP]                |
| 15q22.33 | rs17294280  | chr15    | 67468285  | A/G     | I   | $3.6 \times 10^{-8}$  | 1.053 | [1.034,1.073] | [SMAD3]              |
| 9q34.2   | rs2519093   | chr9     | 136141870 | C/T     | I   | $3.6 \times 10^{-8}$  | 1.055 | [1.035,1.075] | [ABO]                |
| 17q21.32 | rs28397663  | chr17    | 47328183  | C/T     | I   | $4.3 \times 10^{-8}$  | 1.046 | [1.029,1.062] | [FLJ40194]           |

## Quality Statistics for Index SNPs

| assay.name  | is.v2 | is.v3 | is.v4 | gt.rate | hw.p.value | p.date | freq.b | avg.rsqr | min.rsqr | p.batch              | dose.b | qc.mask |
|-------------|-------|-------|-------|---------|------------|--------|--------|----------|----------|----------------------|--------|---------|
| rs950881    | TRUE  | TRUE  | FALSE | 0.9999  | 0.011      | 0.012  | 0.1505 | 0.9922   | 0.9540   | 0.095                | 0.1501 | v2v3v4  |
| rs34004019  | FALSE | FALSE | FALSE |         |            |        |        | 0.7345   | 0.6651   | 0.021                | 0.2631 | v2v3v4  |
| rs1438673   | FALSE | FALSE | FALSE |         |            |        |        | 0.9859   | 0.9678   | 0.045                | 0.5036 | v2v3v4  |
| rs11644510  | FALSE | FALSE | FALSE |         |            |        |        | 0.9258   | 0.9121   | 0.34                 | 0.3749 | v2v3v4  |
| rs11727978  | FALSE | FALSE | FALSE |         |            |        |        | 0.9783   | 0.9621   | 0.080                | 0.8063 | v2v3v4  |
| rs4795400   | FALSE | TRUE  | TRUE  | 0.9986  | 0.96       | 0.90   | 0.4481 | 0.9999   | 0.9985   | 0.26                 | 0.4470 | v2v3v4  |
| rs7936323   | FALSE | FALSE | FALSE |         |            |        |        | 0.9923   | 0.9866   | 1.0                  | 0.5171 | v2v3v4  |
| rs35061832  | FALSE | FALSE | FALSE |         |            |        |        | 0.5371   | 0.4886   | $6.7 \times 10^{-6}$ | 0.6795 | v3      |
| rs4908769   | TRUE  | FALSE | FALSE | 0.9998  | 0.47       | 0.25   | 0.3280 | 0.9361   | 0.9106   | 0.00092              | 0.3216 | v2v3v4  |
| rs9739070   | FALSE | FALSE | FALSE |         |            |        |        | 0.9273   | 0.9058   | 0.11                 | 0.7793 | v2v3v4  |
| rs367023    | FALSE | FALSE | FALSE |         |            |        |        | 0.9879   | 0.9455   | 0.00048              | 0.2821 | v2v3v4  |
| rs148505069 | FALSE | FALSE | FALSE |         |            |        |        | 0.9804   | 0.9726   | 0.67                 | 0.3267 | v2v3v4  |
| rs1775550   | FALSE | FALSE | FALSE |         |            |        |        | 0.9934   | 0.9515   | 0.65                 | 0.1812 | v2v3v4  |
| rs10975488  | FALSE | FALSE | FALSE |         |            |        |        | 0.7519   | 0.7250   | 0.068                | 0.1353 | v2v3v4  |
| rs11217036  | FALSE | FALSE | FALSE |         |            |        |        | 0.9625   | 0.9566   | 0.021                | 0.1997 | v2v3v4  |
| rs201333164 | FALSE | FALSE | FALSE |         |            |        |        | 0.7051   | 0.6791   | $5.2 \times 10^{-7}$ | 0.5865 | v2v3v4  |
| rs2164068   | FALSE | FALSE | FALSE |         |            |        |        | 0.9784   | 0.9724   | 0.13                 | 0.5052 | v2v3v4  |
| rs61977073  | FALSE | FALSE | FALSE |         |            |        |        | 0.9522   | 0.9315   | 0.94                 | 0.2216 | v2v3v4  |
| rs1295686   | TRUE  | TRUE  | TRUE  | 0.9997  | 0.028      | 0.058  | 0.2046 | 0.9994   | 0.9987   | 0.014                | 0.2058 | v2v3v4  |
| rs2070902   | TRUE  | TRUE  | TRUE  | 0.9998  | 0.94       | 0.39   | 0.2506 | 0.9993   | 0.9987   | 0.31                 | 0.2516 | v2v3v4  |
| rs7824394   | FALSE | FALSE | FALSE |         |            |        |        | 0.9629   | 0.9578   | 0.20                 | 0.6217 | v2v3v4  |
| rs2030519   | FALSE | FALSE | FALSE |         |            |        |        | 0.9955   | 0.9848   | 0.00042              | 0.4914 | v2v3v4  |
| rs17294280  | FALSE | FALSE | FALSE |         |            |        |        | 0.8698   | 0.8235   | 0.26                 | 0.2480 | v2v3v4  |
| rs2519093   | FALSE | FALSE | FALSE |         |            |        |        | 0.9922   | 0.9820   | 0.16                 | 0.1962 | v2v3v4  |
| rs28397663  | FALSE | FALSE | FALSE |         |            |        |        | 0.9444   | 0.8911   | 0.00040              | 0.3626 | v2v3v4  |

## SNP Statistics in the GWAS Sample

| assay.name  | AA.0  | AB.0  | BB.0  | im.num.0 | dose.b.0 | AA.1  | AB.1  | BB.1  | im.num.1 | dose.b.1 |
|-------------|-------|-------|-------|----------|----------|-------|-------|-------|----------|----------|
| rs950881    | 60075 | 22387 | 2107  | 113768   | 0.1572   | 43271 | 14048 | 1177  | 66973    | 0.1402   |
| rs34004019  |       |       |       | 113768   | 0.2703   |       |       |       | 66973    | 0.2535   |
| rs1438673   |       |       |       | 113768   | 0.5091   |       |       |       | 66973    | 0.4912   |
| rs11644510  |       |       |       | 113768   | 0.3810   |       |       |       | 66973    | 0.3655   |
| rs11727978  |       |       |       | 113768   | 0.8034   |       |       |       | 66973    | 0.8172   |
| rs4795400   | 31796 | 53500 | 22123 | 113768   | 0.4550   | 18375 | 29066 | 11545 | 66973    | 0.4421   |
| rs7936323   |       |       |       | 113768   | 0.5254   |       |       |       | 66973    | 0.5113   |
| rs35061832  |       |       |       | 78263    | 0.6754   |       |       |       | 50160    | 0.6876   |
| rs4908769   | 3295  | 3070  | 730   | 113768   | 0.3193   | 4352  | 4468  | 1054  | 66973    | 0.3350   |
| rs9739070   |       |       |       | 113768   | 0.7756   |       |       |       | 66973    | 0.7870   |
| rs367023    |       |       |       | 113768   | 0.2890   |       |       |       | 66973    | 0.2804   |
| rs148505069 |       |       |       | 113768   | 0.3245   |       |       |       | 66973    | 0.3376   |
| rs1775550   |       |       |       | 113768   | 0.1778   |       |       |       | 66973    | 0.1870   |
| rs10975488  |       |       |       | 113768   | 0.1308   |       |       |       | 66973    | 0.1380   |
| rs11217036  |       |       |       | 113768   | 0.2038   |       |       |       | 66973    | 0.1935   |
| rs201333164 |       |       |       | 113768   | 0.5837   |       |       |       | 66973    | 0.5956   |
| rs2164068   |       |       |       | 113768   | 0.5022   |       |       |       | 66973    | 0.5153   |
| rs61977073  |       |       |       | 113768   | 0.2174   |       |       |       | 66973    | 0.2261   |
| rs1295686   | 72739 | 36353 | 4639  | 113768   | 0.2007   | 42074 | 21913 | 2965  | 66973    | 0.2081   |
| rs2070902   | 64872 | 41985 | 6890  | 113768   | 0.2453   | 37053 | 25539 | 4373  | 66973    | 0.2562   |
| rs7824394   |       |       |       | 113768   | 0.6271   |       |       |       | 66973    | 0.6166   |
| rs2030519   |       |       |       | 113768   | 0.4854   |       |       |       | 66973    | 0.4958   |
| rs17294280  |       |       |       | 113768   | 0.2447   |       |       |       | 66973    | 0.2525   |
| rs2519093   |       |       |       | 113768   | 0.1924   |       |       |       | 66973    | 0.1998   |
| rs28397663  |       |       |       | 113768   | 0.3612   |       |       |       | 66973    | 0.3718   |

## Annotations from NHGRI GWAS Catalog

The following table shows, for each index SNP, all entries in the NHGRI GWAS Catalog that are within 500kb and in at least moderate linkage disequilibrium ( $r^2 > 0.5$ ).

| region   | position  | our.name   | our.pval              | dist    | rsqr  | assay.name | pvalue                | pubmed.id | trait                                                                                                                                         | genes                              |
|----------|-----------|------------|-----------------------|---------|-------|------------|-----------------------|-----------|-----------------------------------------------------------------------------------------------------------------------------------------------|------------------------------------|
| 2q12.1   | 102932512 | rs950881   | 6.0×10 <sup>-27</sup> | -53048  | 0.829 | rs10189629 | 2.0×10 <sup>-16</sup> | 23817569  | Self-reported allergy                                                                                                                         | IL1RL2, IL1RL1                     |
| 2q12.1   | 102932512 | rs950881   | 6.0×10 <sup>-27</sup> | 21105   | 0.968 | rs3771180  | 2.0×10 <sup>-15</sup> | 21804549  | Asthma                                                                                                                                        | IL1RL1                             |
| 2q12.1   | 102932512 | rs950881   | 6.0×10 <sup>-27</sup> | 22570   | 0.968 | rs13408661 | 1.0×10 <sup>-9</sup>  | 23028483  | Asthma                                                                                                                                        | IL1RL1, IL18R1                     |
| 2q12.1   | 102932512 | rs950881   | 6.0×10 <sup>-27</sup> | 27698   | 0.948 | rs3771175  | 5.0×10 <sup>-11</sup> | 23817571  | Allergic sensitization                                                                                                                        | IL1RL1, IL18R1, IL18RAP            |
| 2q12.1   | 102932512 | rs950881   | 6.0×10 <sup>-27</sup> | 34037   | 0.947 | rs10197862 | 4.0×10 <sup>-11</sup> | 24388013  | Asthma and hay fever                                                                                                                          | IL1RL1                             |
| 5q22.1   | 110467499 | rs1438673  | 3.2×10 <sup>-17</sup> | -61824  | 0.771 | rs3806932  | 3.0×10 <sup>-9</sup>  | 20208534  | Eosinophilic esophagitis (pediatric)                                                                                                          | WDR36                              |
| 5q22.1   | 110467499 | rs1438673  | 3.2×10 <sup>-17</sup> | -59497  | 0.556 | rs1898671  | 5.0×10 <sup>-6</sup>  | 22036096  | Allergic rhinitis                                                                                                                             | TSLP                               |
| 5q22.1   | 110467499 | rs1438673  | 3.2×10 <sup>-17</sup> | 0       | 1.000 | rs1438673  | 3.0×10 <sup>-11</sup> | 24388013  | Asthma and hay fever                                                                                                                          | WDR36                              |
| 5q22.1   | 110467499 | rs1438673  | 3.2×10 <sup>-17</sup> | 0       | 1.000 | rs1438673  | 2.0×10 <sup>-20</sup> | 23817569  | Self-reported allergy                                                                                                                         | WDR36, CAMK4, TSLP                 |
| 16p13.13 | 11277358  | rs11644510 | 1.5×10 <sup>-16</sup> | -66943  | 0.608 | rs9923856  | 6.0×10 <sup>-6</sup>  | 23042114  | Atopic dermatitis                                                                                                                             | CLEC16A                            |
| 16p13.13 | 11277358  | rs11644510 | 1.5×10 <sup>-16</sup> | -48646  | 0.509 | rs62026376 | 1.0×10 <sup>-8</sup>  | 24388013  | Asthma and hay fever                                                                                                                          | CLEC16A                            |
| 16p13.13 | 11277358  | rs11644510 | 1.5×10 <sup>-16</sup> | -46655  | 0.504 | rs7203459  | 2.0×10 <sup>-7</sup>  | 23817569  | Self-reported allergy                                                                                                                         | CLEC16A                            |
| 4p14     | 38811051  | rs11727978 | 1.1×10 <sup>-15</sup> | -26327  | 0.661 | rs10004195 | 1.0×10 <sup>-18</sup> | 23652523  | Helicobacter pylori serologic status                                                                                                          | TLR10, TLR1, FAM114A1, TLR6, KLF3  |
| 4p14     | 38811051  | rs11727978 | 1.1×10 <sup>-15</sup> | -18527  | 0.711 | rs4543123  | 9.0×10 <sup>-6</sup>  | 23743675  | Alcohol consumption                                                                                                                           | Intergenic                         |
| 4p14     | 38811051  | rs11727978 | 1.1×10 <sup>-15</sup> | -11341  | 0.675 | rs4833095  | 5.0×10 <sup>-12</sup> | 24388013  | Asthma and hay fever                                                                                                                          | TLR1                               |
| 4p14     | 38811051  | rs11727978 | 1.1×10 <sup>-15</sup> | 500     | 0.804 | rs2101521  | 5.0×10 <sup>-21</sup> | 23817569  | Self-reported allergy                                                                                                                         | TLR1, TLR6, TLR10                  |
| 4p14     | 38811051  | rs11727978 | 1.1×10 <sup>-15</sup> | 1825    | 0.720 | rs17616434 | 5.0×10 <sup>-11</sup> | 23817571  | Allergic sensitization                                                                                                                        | TLR1, TLR6, TLR10, ...             |
| 17q12    | 38067020  | rs4795400  | 2.8×10 <sup>-15</sup> | -154643 | 0.804 | rs12946510 | 4.0×10 <sup>-38</sup> | 23128233  | Inflammatory bowel disease                                                                                                                    | IKZF3, ZPBP2, GSDMB, ORMDL3, GSDMA |
| 17q12    | 38067020  | rs4795400  | 2.8×10 <sup>-15</sup> | -144761 | 0.875 | rs907092   | 8.0×10 <sup>-6</sup>  | 19458352  | Primary biliary cirrhosis                                                                                                                     | IKZF3                              |
| 17q12    | 38067020  | rs4795400  | 2.8×10 <sup>-15</sup> | -90551  | 0.751 | rs9303277  | 7.0×10 <sup>-6</sup>  | 23740937  | Systemic lupus erythematosus and Systemic sclerosis                                                                                           | IKZF3                              |
| 17q12    | 38067020  | rs4795400  | 2.8×10 <sup>-15</sup> | -90551  | 0.751 | rs9303277  | 4.0×10 <sup>-9</sup>  | 23000144  | Primary biliary cirrhosis                                                                                                                     | IKZF3, ZPBP2, ...                  |
| 17q12    | 38067020  | rs4795400  | 2.8×10 <sup>-15</sup> | -90551  | 0.751 | rs9303277  | 2.0×10 <sup>-9</sup>  | 20639880  | Primary biliary cirrhosis                                                                                                                     | IKZF3, ZPBP2, GSDMB, ORMDL3        |
| 17q12    | 38067020  | rs4795400  | 2.8×10 <sup>-15</sup> | -26257  | 0.943 | rs2872507  | 2.0×10 <sup>-6</sup>  | 21829393  | Type 1 diabetes autoantibodies                                                                                                                | ORMDL3                             |
| 17q12    | 38067020  | rs4795400  | 2.8×10 <sup>-15</sup> | -26257  | 0.943 | rs2872507  | 5.0×10 <sup>-11</sup> | 21297633  | Ulcerative colitis                                                                                                                            | IKZF3, ORMDL3, ...                 |
| 17q12    | 38067020  | rs4795400  | 2.8×10 <sup>-15</sup> | -26257  | 0.943 | rs2872507  | 2.0×10 <sup>-9</sup>  | 21102463  | Crohn's disease                                                                                                                               | GSDML, ZPBP2, ORMDL3, IKZF3        |
| 17q12    | 38067020  | rs4795400  | 2.8×10 <sup>-15</sup> | -26257  | 0.943 | rs2872507  | 9.0×10 <sup>-7</sup>  | 20453842  | Rheumatoid arthritis                                                                                                                          | IKZF3                              |
| 17q12    | 38067020  | rs4795400  | 2.8×10 <sup>-15</sup> | -26257  | 0.943 | rs2872507  | 5.0×10 <sup>-9</sup>  | 18587394  | Crohn's disease                                                                                                                               | ORMDL3                             |
| 17q12    | 38067020  | rs4795400  | 2.8×10 <sup>-15</sup> | -15672  | 0.781 | rs8067378  | 9.0×10 <sup>-10</sup> | 23817570  | Cervical cancer                                                                                                                               | GSDMB                              |
| 17q12    | 38067020  | rs4795400  | 2.8×10 <sup>-15</sup> | -9823   | 0.963 | rs8069176  | 5.0×10 <sup>-6</sup>  | 24315451  | Fractional exhaled nitric oxide (childhood)                                                                                                   | ZPBP2, GSDMB                       |
| 17q12    | 38067020  | rs4795400  | 2.8×10 <sup>-15</sup> | -4824   | 0.974 | rs2305480  | 6.0×10 <sup>-23</sup> | 24241537  | Asthma (childhood, severe)                                                                                                                    | GSDMB                              |
| 17q12    | 38067020  | rs4795400  | 2.8×10 <sup>-15</sup> | -4824   | 0.974 | rs2305480  | 1.0×10 <sup>-7</sup>  | 20860503  | Asthma                                                                                                                                        | GSDMB                              |
| 17q12    | 38067020  | rs4795400  | 2.8×10 <sup>-15</sup> | -4824   | 0.974 | rs2305480  | 3.0×10 <sup>-8</sup>  | 20228799  | Ulcerative colitis                                                                                                                            | ORMDL3, ZPBP2, GSDML               |
| 17q12    | 38067020  | rs4795400  | 2.8×10 <sup>-15</sup> | -2615   | 0.968 | rs11078927 | 2.0×10 <sup>-16</sup> | 21804549  | Asthma                                                                                                                                        | GSDMB                              |
| 17q12    | 38067020  | rs4795400  | 2.8×10 <sup>-15</sup> | -780    | 0.822 | rs2290400  | 6.0×10 <sup>-13</sup> | 19430480  | Type 1 diabetes                                                                                                                               | ORMDL3                             |
| 17q12    | 38067020  | rs4795400  | 2.8×10 <sup>-15</sup> | 2929    | 0.822 | rs7216389  | 9.0×10 <sup>-11</sup> | 17611496  | Asthma                                                                                                                                        | ORMDL3                             |
| 17q12    | 38067020  | rs4795400  | 2.8×10 <sup>-15</sup> | 7011    | 0.762 | rs9303280  | 9.0×10 <sup>-9</sup>  | 23817569  | Self-reported allergy                                                                                                                         | GSDMB, IKZF3                       |
| 17q12    | 38067020  | rs4795400  | 2.8×10 <sup>-15</sup> | 22324   | 0.769 | rs4794820  | 1.0×10 <sup>-8</sup>  | 22561531  | Asthma                                                                                                                                        | ORMDL3                             |
| 11q13.5  | 76293758  | rs7936323  | 1.1×10 <sup>-14</sup> | -23075  | 0.570 | rs7130588  | 4.0×10 <sup>-13</sup> | 23886662  | Atopic dermatitis                                                                                                                             | C11orf30, LRR32                    |
| 11q13.5  | 76293758  | rs7936323  | 1.1×10 <sup>-14</sup> | -23075  | 0.570 | rs7130588  | 2.0×10 <sup>-8</sup>  | 21907864  | Asthma                                                                                                                                        | LRR32                              |
| 11q13.5  | 76293758  | rs7936323  | 1.1×10 <sup>-14</sup> | 5436    | 0.898 | rs2155219  | 1.0×10 <sup>-18</sup> | 23817571  | Allergic sensitization                                                                                                                        | C11orf30, LRR32                    |
| 11q13.5  | 76293758  | rs7936323  | 1.1×10 <sup>-14</sup> | 5436    | 0.898 | rs2155219  | 2.0×10 <sup>-19</sup> | 23817569  | Self-reported allergy                                                                                                                         | C11orf30, LRR32                    |
| 11q13.5  | 76293758  | rs7936323  | 1.1×10 <sup>-14</sup> | 5436    | 0.898 | rs2155219  | 4.0×10 <sup>-36</sup> | 23128233  | Inflammatory bowel disease                                                                                                                    | Intergenic                         |
| 11q13.5  | 76293758  | rs7936323  | 1.1×10 <sup>-14</sup> | 5436    | 0.898 | rs2155219  | 1.0×10 <sup>-8</sup>  | 22036096  | IgE grass sensitization                                                                                                                       | C11orf30, LRR32                    |
| 11q13.5  | 76293758  | rs7936323  | 1.1×10 <sup>-14</sup> | 5436    | 0.898 | rs2155219  | 4.0×10 <sup>-8</sup>  | 22036096  | Allergic rhinitis                                                                                                                             | C11orf30, LRR32                    |
| 11q13.5  | 76293758  | rs7936323  | 1.1×10 <sup>-14</sup> | 5436    | 0.898 | rs2155219  | 5.0×10 <sup>-16</sup> | 21297633  | Ulcerative colitis                                                                                                                            | Intergenic                         |
| 11q13.5  | 76293758  | rs7936323  | 1.1×10 <sup>-14</sup> | 7558    | 0.642 | rs7927894  | 8.0×10 <sup>-10</sup> | 19349984  | Atopic dermatitis                                                                                                                             | C11orf30                           |
| 11q13.5  | 76293758  | rs7936323  | 1.1×10 <sup>-14</sup> | 7558    | 0.642 | rs7927894  | 1.0×10 <sup>-9</sup>  | 18587394  | Crohn's disease                                                                                                                               | C11orf30                           |
| 11q13.5  | 76293758  | rs7936323  | 1.1×10 <sup>-14</sup> | 7617    | 0.642 | rs7927997  | 6.0×10 <sup>-13</sup> | 21102463  | Crohn's disease                                                                                                                               | C11orf30                           |
| 1p36.23  | 8701288   | rs4908769  | 2.3×10 <sup>-12</sup> | -278612 | 0.618 | rs2252865  | 5.0×10 <sup>-7</sup>  | 23453885  | Autism spectrum disorder, attention deficit-hyperactivity disorder, bipolar disorder, major depressive disorder, and schizophrenia (combined) | SLC45A1, RERE, ENO1                |
| 1p36.23  | 8701288   | rs4908769  | 2.3×10 <sup>-12</sup> | -278612 | 0.618 | rs2252865  | 3.0×10 <sup>-6</sup>  | 21926974  | Schizophrenia                                                                                                                                 |                                    |
| 1p36.23  | 8701288   | rs4908769  | 2.3×10 <sup>-12</sup> | -253566 | 0.555 | rs2120461  | 3.0×10 <sup>-6</sup>  | 22504420  | Bone mineral density                                                                                                                          | RERE                               |
| 12q24.31 | 123771032 | rs9739070  | 1.3×10 <sup>-11</sup> | -313413 | 0.565 | rs7296418  | 2.0×10 <sup>-6</sup>  | 21507922  | Platelet counts                                                                                                                               | ABC9                               |
| 12q24.31 | 123771032 | rs9739070  | 1.3×10 <sup>-11</sup> | -130179 | 0.844 | rs1727313  | 1.0×10 <sup>-8</sup>  | 24509480  | Type 2 diabetes                                                                                                                               | MPHOSPH9                           |
| 12q24.31 | 123771032 | rs9739070  | 1.3×10 <sup>-11</sup> | -114307 | 0.844 | rs1790100  | 7.0×10 <sup>-7</sup>  | 19525953  | Multiple sclerosis                                                                                                                            | MPHOSPH9                           |

|          |           |             |                       |         |       |            |                        |          |                                                |                      |
|----------|-----------|-------------|-----------------------|---------|-------|------------|------------------------|----------|------------------------------------------------|----------------------|
| 12q24.31 | 123771032 | rs9739070   | 1.3×10 <sup>-11</sup> | -39609  | 0.551 | rs11532322 | 2.0×10 <sup>-8</sup>   | 23974872 | Schizophrenia                                  | C12orf65, ABCB9, ... |
| 12q24.31 | 123771032 | rs9739070   | 1.3×10 <sup>-11</sup> | 51679   | 0.936 | rs7980687  | 8.0×10 <sup>-9</sup>   | 22504419 | Head circumference (infant)                    | SBNO1                |
| 12q24.31 | 123771032 | rs9739070   | 1.3×10 <sup>-11</sup> | 52514   | 0.936 | rs11830103 | 4.0×10 <sup>-15</sup>  | 20881960 | Height                                         | SBNO1                |
| 2p25.1   | 8450123   | rs367023    | 2.1×10 <sup>-11</sup> | -7875   | 0.878 | rs10174949 | 1.0×10 <sup>-7</sup>   | 23817569 | Self-reported allergy                          | ID2                  |
| 4q27     | 123417564 | rs148505069 | 3.8×10 <sup>-11</sup> | -285072 | 0.937 | rs4505848  | 5.0×10 <sup>-13</sup>  | 19430480 | Type 1 diabetes                                | IL2                  |
| 4q27     | 123417564 | rs148505069 | 3.8×10 <sup>-11</sup> | -219129 | 0.844 | rs6534347  | 2.0×10 <sup>-6</sup>   | 17554300 | Type 1 diabetes                                |                      |
| 4q27     | 123417564 | rs148505069 | 3.8×10 <sup>-11</sup> | -88202  | 0.772 | rs17388568 | 4.0×10 <sup>-8</sup>   | 23817569 | Self-reported allergy                          | ADAD1                |
| 4q27     | 123417564 | rs148505069 | 3.8×10 <sup>-11</sup> | -88202  | 0.772 | rs17388568 | 6.0×10 <sup>-6</sup>   | 21829393 | Type 1 diabetes autoantibodies                 | ADAD1                |
| 4q27     | 123417564 | rs148505069 | 3.8×10 <sup>-11</sup> | -88202  | 0.772 | rs17388568 | 9.0×10 <sup>-7</sup>   | 21297633 | Ulcerative colitis                             | IL21, IL2, ADAD1     |
| 4q27     | 123417564 | rs148505069 | 3.8×10 <sup>-11</sup> | -64132  | 0.576 | rs17454584 | 6.0×10 <sup>-10</sup>  | 23817571 | Allergic sensitization                         | IL2, ADAD1, ...      |
| 4q27     | 123417564 | rs148505069 | 3.8×10 <sup>-11</sup> | -44431  | 0.787 | rs2069772  | 1.0×10 <sup>-6</sup>   | 22036096 | IgE grass sensitization                        | IL2                  |
| 11q23.3  | 118675772 | rs11217036  | 9.3×10 <sup>-11</sup> | -63991  | 0.859 | rs10892279 | 1.0×10 <sup>-12</sup>  | 21383967 | Celiac disease and Rheumatoid arthritis        | DDX6                 |
| 11q23.3  | 118675772 | rs11217036  | 9.3×10 <sup>-11</sup> | 68000   | 0.671 | rs6421571  | 3.0×10 <sup>-12</sup>  | 21399635 | Primary biliary cirrhosis                      | CXCR5                |
| 2q33.1   | 198943852 | rs2164068   | 1.6×10 <sup>-10</sup> | -46957  | 0.873 | rs6738825  | 6.0×10 <sup>-6</sup>   | 23983088 | Dermatomyositis                                | PLCL1                |
| 2q33.1   | 198943852 | rs2164068   | 1.6×10 <sup>-10</sup> | -46957  | 0.873 | rs6738825  | 4.0×10 <sup>-9</sup>   | 21102463 | Crohn's disease                                | PLCL1                |
| 2q33.1   | 198943852 | rs2164068   | 1.6×10 <sup>-10</sup> | -32686  | 0.895 | rs67031482 | 4.0×10 <sup>-6</sup>   | 23743675 | Alcohol consumption                            | PLCL1                |
| 2q33.1   | 198943852 | rs2164068   | 1.6×10 <sup>-10</sup> | -29780  | 0.895 | rs10497813 | 6.0×10 <sup>-10</sup>  | 23817569 | Self-reported allergy                          | PLCL1                |
| 14q21.1  | 38151255  | rs61977073  | 3.5×10 <sup>-10</sup> | -74107  | 0.712 | rs1998359  | 5.0×10 <sup>-8</sup>   | 23817569 | Self-reported allergy                          | FOXAI, TTC6          |
| 5q31.1   | 131995843 | rs1295686   | 5.5×10 <sup>-10</sup> | 0       | 1.000 | rs1295686  | 2.0×10 <sup>-6</sup>   | 24241537 | Asthma (childhood, severe)                     | IL13                 |
| 5q31.1   | 131995843 | rs1295686   | 5.5×10 <sup>-10</sup> | 0       | 1.000 | rs1295686  | 2.0×10 <sup>-17</sup>  | 23886662 | Atopic dermatitis                              | IL13, RAD50          |
| 5q31.1   | 131995843 | rs1295686   | 5.5×10 <sup>-10</sup> | 0       | 1.000 | rs1295686  | 2.0×10 <sup>-6</sup>   | 23042114 | Atopic dermatitis                              | KIF3A, IL13          |
| 5q31.1   | 131995843 | rs1295686   | 5.5×10 <sup>-10</sup> | 0       | 1.000 | rs1295686  | 1.0×10 <sup>-7</sup>   | 20860503 | Asthma                                         | IL13                 |
| 5q31.1   | 131995843 | rs1295686   | 5.5×10 <sup>-10</sup> | 121     | 0.992 | rs20541    | 1.0×10 <sup>-6</sup>   | 23817569 | Self-reported allergy                          | Intergenic           |
| 5q31.1   | 131995843 | rs1295686   | 5.5×10 <sup>-10</sup> | 121     | 0.992 | rs20541    | 1.0×10 <sup>-8</sup>   | 22286212 | Hodgkin's lymphoma                             | IL13                 |
| 5q31.1   | 131995843 | rs1295686   | 5.5×10 <sup>-10</sup> | 121     | 0.992 | rs20541    | 3.0×10 <sup>-18</sup>  | 22075330 | IgE levels                                     | IL13                 |
| 5q31.1   | 131995843 | rs1295686   | 5.5×10 <sup>-10</sup> | 121     | 0.992 | rs20541    | 5.0×10 <sup>-15</sup>  | 19169254 | Psoriasis                                      | IL13                 |
| 8q21.13  | 81292599  | rs7824394   | 1.2×10 <sup>-9</sup>  | -24444  | 0.791 | rs6473223  | 8.0×10 <sup>-8</sup>   | 23817569 | Self-reported allergy                          | TPD52, ZBTB10        |
| 8q21.13  | 81292599  | rs7824394   | 1.2×10 <sup>-9</sup>  | -720    | 0.869 | rs7009110  | 4.0×10 <sup>-9</sup>   | 24388013 | Asthma and hay fever                           | ZBTB10               |
| 8q21.13  | 81292599  | rs7824394   | 1.2×10 <sup>-9</sup>  | 15551   | 0.562 | rs7000782  | 1.0×10 <sup>-6</sup>   | 22197932 | Atopic dermatitis                              | ZBTB10               |
| 3q28     | 188119901 | rs2030519   | 3.1×10 <sup>-8</sup>  | -47388  | 0.697 | rs9865818  | 3.0×10 <sup>-10</sup>  | 23817571 | Allergic sensitization                         | LPP, BCL6            |
| 3q28     | 188119901 | rs2030519   | 3.1×10 <sup>-8</sup>  | -32273  | 0.861 | rs9851967  | 9.0×10 <sup>-8</sup>   | 22951725 | Vitiligo                                       | LPP                  |
| 3q28     | 188119901 | rs2030519   | 3.1×10 <sup>-8</sup>  | -7347   | 0.825 | rs1464510  | 1.0×10 <sup>-11</sup>  | 20410501 | Vitiligo                                       | LPP                  |
| 3q28     | 188119901 | rs2030519   | 3.1×10 <sup>-8</sup>  | -7347   | 0.825 | rs1464510  | 3.0×10 <sup>-40</sup>  | 20190752 | Celiac disease                                 | LPP                  |
| 3q28     | 188119901 | rs2030519   | 3.1×10 <sup>-8</sup>  | -7347   | 0.825 | rs1464510  | 5.0×10 <sup>-9</sup>   | 18311140 | Celiac disease                                 | LPP                  |
| 3q28     | 188119901 | rs2030519   | 3.1×10 <sup>-8</sup>  | 9078    | 0.903 | rs9860547  | 1.0×10 <sup>-9</sup>   | 23817569 | Self-reported allergy                          | LPP, BCL6            |
| 15q22.33 | 67468285  | rs17294280  | 3.6×10 <sup>-8</sup>  | -25689  | 0.709 | rs17293632 | 6.0×10 <sup>-16</sup>  | 23128233 | Inflammatory bowel disease                     | SMAD3                |
| 15q22.33 | 67468285  | rs17294280  | 3.6×10 <sup>-8</sup>  | -25689  | 0.709 | rs17293632 | 3.0×10 <sup>-19</sup>  | 21102463 | Crohn's disease                                | SMAD3                |
| 15q22.33 | 67468285  | rs17294280  | 3.6×10 <sup>-8</sup>  | -17980  | 0.702 | rs17228058 | 1.0×10 <sup>-8</sup>   | 23817569 | Self-reported allergy                          | SMAD3                |
| 15q22.33 | 67468285  | rs17294280  | 3.6×10 <sup>-8</sup>  | 0       | 1.000 | rs17294280 | 4.0×10 <sup>-9</sup>   | 24388013 | Asthma and hay fever                           | SMAD3                |
| 9q34.2   | 136141870 | rs2519093   | 3.6×10 <sup>-8</sup>  | 7529    | 0.991 | rs507666   | 4.0×10 <sup>-11</sup>  | 24386095 | Lipid traits                                   | ABO                  |
| 9q34.2   | 136141870 | rs2519093   | 3.6×10 <sup>-8</sup>  | 7529    | 0.991 | rs507666   | 3.0×10 <sup>-91</sup>  | 21533024 | Soluble ICAM-1                                 | ABO                  |
| 9q34.2   | 136141870 | rs2519093   | 3.6×10 <sup>-8</sup>  | 7529    | 0.991 | rs507666   | 5.0×10 <sup>-29</sup>  | 18604267 | Soluble ICAM-1                                 | ABO                  |
| 9q34.2   | 136141870 | rs2519093   | 3.6×10 <sup>-8</sup>  | 12005   | 0.826 | rs651007   | 6.0×10 <sup>-20</sup>  | 24816252 | Blood metabolite levels                        | ABO                  |
| 9q34.2   | 136141870 | rs2519093   | 3.6×10 <sup>-8</sup>  | 12005   | 0.826 | rs651007   | 1.0×10 <sup>-56</sup>  | 24094242 | Serum alkaline phosphatase levels              | SURF6, ABO           |
| 9q34.2   | 136141870 | rs2519093   | 3.6×10 <sup>-8</sup>  | 12005   | 0.826 | rs651007   | 2.0×10 <sup>-25</sup>  | 23381943 | End-stage coagulation                          | ABO                  |
| 9q34.2   | 136141870 | rs2519093   | 3.6×10 <sup>-8</sup>  | 12005   | 0.826 | rs651007   | 6.0×10 <sup>-9</sup>   | 21909109 | Metabolite levels                              | ABO                  |
| 9q34.2   | 136141870 | rs2519093   | 3.6×10 <sup>-8</sup>  | 12005   | 0.826 | rs651007   | 2.0×10 <sup>-82</sup>  | 20147318 | E-selectin levels                              | ABO                  |
| 9q34.2   | 136141870 | rs2519093   | 3.6×10 <sup>-8</sup>  | 12298   | 0.826 | rs579459   | 2.0×10 <sup>-32</sup>  | 24586186 | Urinary metabolites (H-NMR features)           | ABO                  |
| 9q34.2   | 136141870 | rs2519093   | 3.6×10 <sup>-8</sup>  | 12298   | 0.826 | rs579459   | 3.0×10 <sup>-8</sup>   | 24262325 | Coronary artery disease or large artery stroke | ABO                  |
| 9q34.2   | 136141870 | rs2519093   | 3.6×10 <sup>-8</sup>  | 12298   | 0.826 | rs579459   | 2.0×10 <sup>-9</sup>   | 24262325 | Coronary artery disease or ischemic stroke     | ABO                  |
| 9q34.2   | 136141870 | rs2519093   | 3.6×10 <sup>-8</sup>  | 12298   | 0.826 | rs579459   | 2.0×10 <sup>-7</sup>   | 24262325 | Coronary artery disease                        | ABO                  |
| 9q34.2   | 136141870 | rs2519093   | 3.6×10 <sup>-8</sup>  | 12298   | 0.826 | rs579459   | 9.0×10 <sup>-18</sup>  | 23222517 | Red blood cell traits                          | ABO                  |
| 9q34.2   | 136141870 | rs2519093   | 3.6×10 <sup>-8</sup>  | 12298   | 0.826 | rs579459   | 3.0×10 <sup>-123</sup> | 22001757 | Liver enzyme levels (alkaline phosphatase)     | ABO                  |
| 9q34.2   | 136141870 | rs2519093   | 3.6×10 <sup>-8</sup>  | 12298   | 0.826 | rs579459   | 4.0×10 <sup>-14</sup>  | 21378990 | Coronary heart disease                         | ABO                  |
| 9q34.2   | 136141870 | rs2519093   | 3.6×10 <sup>-8</sup>  | 12298   | 0.826 | rs579459   | 2.0×10 <sup>-41</sup>  | 20167578 | Soluble levels of adhesion molecules           | ABO                  |
| 9q34.2   | 136141870 | rs2519093   | 3.6×10 <sup>-8</sup>  | 12298   | 0.826 | rs579459   | 1.0×10 <sup>-29</sup>  | 19729612 | Soluble E-selectin levels                      | ABO                  |
| 9q34.2   | 136141870 | rs2519093   | 3.6×10 <sup>-8</sup>  | 12434   | 0.826 | rs649129   | 9.0×10 <sup>-37</sup>  | 24816252 | Blood metabolite ratios                        | ABO                  |
| 9q34.2   | 136141870 | rs2519093   | 3.6×10 <sup>-8</sup>  | 12997   | 0.826 | rs495828   | 3.0×10 <sup>-16</sup>  | 22672568 | Venous thromboembolism                         | ABO                  |
| 9q34.2   | 136141870 | rs2519093   | 3.6×10 <sup>-8</sup>  | 12997   | 0.826 | rs495828   | 3.0×10 <sup>-12</sup>  | 20139978 | Red blood cell count                           | ABO                  |
| 9q34.2   | 136141870 | rs2519093   | 3.6×10 <sup>-8</sup>  | 12997   | 0.826 | rs495828   | 6.0×10 <sup>-10</sup>  | 20139978 | Hematological and biochemical traits           | ABO                  |
| 9q34.2   | 136141870 | rs2519093   | 3.6×10 <sup>-8</sup>  | 12997   | 0.826 | rs495828   | 3.0×10 <sup>-8</sup>   | 20066004 | Angiotensin-converting enzyme activity         | ABO                  |
| 9q34.2   | 136141870 | rs2519093   | 3.6×10 <sup>-8</sup>  | 13130   | 0.983 | rs635634   | 8.0×10 <sup>-22</sup>  | 20686565 | LDL cholesterol                                | ABO                  |
| 9q34.2   | 136141870 | rs2519093   | 3.6×10 <sup>-8</sup>  | 13130   | 0.983 | rs635634   | 9.0×10 <sup>-21</sup>  | 20686565 | Cholesterol, total                             | ABO                  |
| 17q21.32 | 47328183  | rs28397663  | 4.3×10 <sup>-8</sup>  | 74624   | 0.911 | rs12940887 | 2.0×10 <sup>-7</sup>   | 21909110 | Blood pressure                                 | ZNF652               |
| 17q21.32 | 47328183  | rs28397663  | 4.3×10 <sup>-8</sup>  | 112283  | 0.867 | rs16948048 | 5.0×10 <sup>-9</sup>   | 19430483 | Diastolic blood pressure                       | ZNF652, PHB          |

## Replication of GWAS Catalog Results

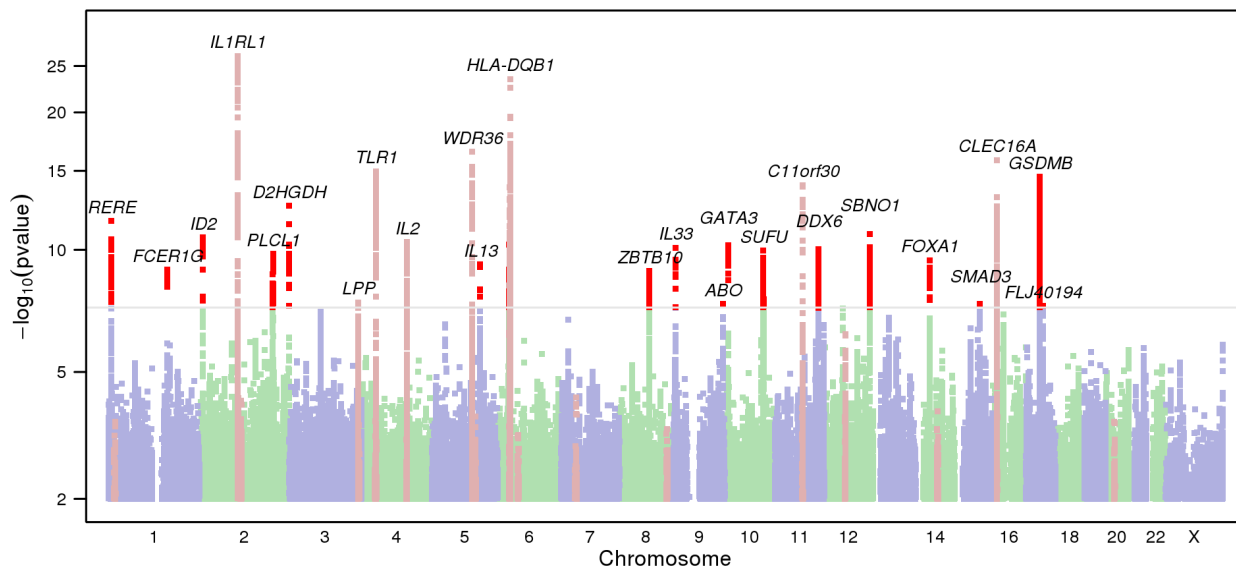

The following table shows, for each GWAS Catalog result for similar traits, our association test result for our best available proxy (distance < 100kb,  $r^2 > 0.8$ ).

| region   | position  | our.name   | our.pval              | dist | rsqr  | assay.name | pvalue                | pubmed.id | trait                  | genes                               |
|----------|-----------|------------|-----------------------|------|-------|------------|-----------------------|-----------|------------------------|-------------------------------------|
| 2q12.1   | 102960210 | rs3771175  | $5.2 \times 10^{-26}$ | 0    | 1.000 | rs3771175  | $5.0 \times 10^{-11}$ | 23817571  | Allergic sensitization | IL1RL1, IL18R1, IL18RAP             |
| 2q13     | 112470155 | rs11122895 | 0.059                 | 0    | 1.000 | rs11122895 | $2.0 \times 10^{-6}$  | 23817571  | Allergic sensitization | ANAPC1                              |
| 3q28     | 188072513 | rs9865818  | $3.9 \times 10^{-6}$  | 0    | 1.000 | rs9865818  | $3.0 \times 10^{-10}$ | 23817571  | Allergic sensitization | LPP, BCL6                           |
| 4p14     | 38812876  | rs17616434 | $6.0 \times 10^{-14}$ | 0    | 1.000 | rs17616434 | $5.0 \times 10^{-11}$ | 23817571  | Allergic sensitization | TLR1, TLR6, TLR10, MIR574, FAM114A1 |
| 4q27     | 123353432 | rs17454584 | $6.6 \times 10^{-9}$  | 0    | 1.000 | rs17454584 | $6.0 \times 10^{-10}$ | 23817571  | Allergic sensitization | IL2, ADAD1, KIAA1109, IL21          |
| 5q22.1   | 110190052 | rs10056340 | $1.4 \times 10^{-7}$  | 0    | 1.000 | rs10056340 | $5.0 \times 10^{-14}$ | 23817571  | Allergic sensitization | SLC25A46, TSLP, WDR36, CAMK4        |
| 6p21.33  | 31354182  | rs6932730  |                       | 0    | 1.000 | rs6932730  | $4.0 \times 10^{-8}$  | 23817571  | Allergic sensitization | HLA-B, MICA, HLA-C, MICB            |
| 6p21.32  | 32626311  | rs6906021  | $2.6 \times 10^{-15}$ | 0    | 1.000 | rs6906021  | $2.0 \times 10^{-12}$ | 23817571  | Allergic sensitization | HLA-DQB1, HLA-DQA1,                 |
| 6p12.1   | 56210764  | rs16887812 | 0.74                  | 0    | 1.000 | rs16887812 | $7.0 \times 10^{-6}$  | 23817571  | Allergic sensitization | COL21A1                             |
| 8q24.21  | 128815029 | rs4410871  | 0.0019                | 0    | 1.000 | rs4410871  | $5.0 \times 10^{-10}$ | 23817571  | Allergic sensitization | MYC, PVT1                           |
| 11q13.5  | 76299194  | rs2155219  | $1.1 \times 10^{-13}$ | 0    | 1.000 | rs2155219  | $1.0 \times 10^{-18}$ | 23817571  | Allergic sensitization | C11orf30, LRRC32                    |
| 12q13.3  | 57489709  | rs1059513  | $6.0 \times 10^{-7}$  | 0    | 1.000 | rs1059513  | $1.0 \times 10^{-14}$ | 23817571  | Allergic sensitization | STAT6                               |
| 5q22.1   | 110146446 | rs17513503 | $2.5 \times 10^{-6}$  | 0    | 1.000 | rs17513503 | $7.0 \times 10^{-7}$  | 22036096  | Allergic rhinitis      | TMEM232, SLCA25A46                  |
| 5q22.1   | 110408002 | rs1898671  | $1.3 \times 10^{-15}$ | 0    | 1.000 | rs1898671  | $5.0 \times 10^{-6}$  | 22036096  | Allergic rhinitis      | TSLP                                |
| 5q23.1   | 115975656 | rs6898653  | 0.92                  | 0    | 1.000 | rs6898653  | $1.0 \times 10^{-6}$  | 22036096  | Allergic rhinitis      | SEMA6A                              |
| 7p14.1   | 42264679  | rs4724100  | 0.74                  | 0    | 1.000 | rs4724100  | $2.0 \times 10^{-6}$  | 22036096  | Allergic rhinitis      | GLI3                                |
| 11q13.5  | 76299194  | rs2155219  | $1.1 \times 10^{-13}$ | 0    | 1.000 | rs2155219  | $4.0 \times 10^{-8}$  | 22036096  | Allergic rhinitis      | C11orf30, LRRC32                    |
| 14q23.1  | 60683430  | rs216518   | 0.48                  | 0    | 1.000 | rs216518   | $2.0 \times 10^{-6}$  | 22036096  | Allergic rhinitis      | PPM1A, DHRS7                        |
| 16p13.13 | 11158885  | rs887864   | $2.3 \times 10^{-9}$  | 0    | 1.000 | rs887864   | $1.0 \times 10^{-6}$  | 22036096  | Allergic rhinitis      | CLEC16A                             |
| 20p11.21 | 25206654  | rs1044573  | 0.26                  | 0    | 1.000 | rs1044573  | $1.0 \times 10^{-6}$  | 22036096  | Allergic rhinitis      | ENTPD6                              |

## Nearby Nonsynonymous SNPs

| region   | position  | our.name   | our.pval              | dist   | rsqr  | assay.name | gene     | aa.chg |
|----------|-----------|------------|-----------------------|--------|-------|------------|----------|--------|
| 2q12.1   | 102932512 | rs950881   | $6.0 \times 10^{-27}$ | 22956  | 0.557 | rs1041973  | IL1RL1   | A78E   |
| 6p21.32  | 32626403  | rs34004019 | $3.2 \times 10^{-24}$ | -17277 | 0.528 | rs1071630  | HLA-DQA1 | F41S   |
| 6p21.32  | 32626403  | rs34004019 | $3.2 \times 10^{-24}$ | 6367   | 0.645 | rs1049069  | HLA-DQB1 | Y62?   |
| 4p14     | 38811051  | rs11727978 | $1.1 \times 10^{-15}$ | -36162 | 0.823 | rs4129009  | TLR10    | I775V  |
| 4p14     | 38811051  | rs11727978 | $1.1 \times 10^{-15}$ | -11341 | 0.675 | rs4833095  | TLR1     | N248S  |
| 17q12    | 38067020  | rs4795400  | $2.8 \times 10^{-15}$ | -38386 | 0.807 | rs11557467 | ZPBP2    | S173I  |
| 17q12    | 38067020  | rs4795400  | $2.8 \times 10^{-15}$ | -4824  | 0.974 | rs2305480  | GSDMB    | P311S  |
| 17q12    | 38067020  | rs4795400  | $2.8 \times 10^{-15}$ | -4803  | 0.833 | rs2305479  | GSDMB    | G304R  |
| 2q37.3   | 242692490 | rs35061832 | $2.8 \times 10^{-13}$ | -1815  | 0.741 | rs1106639  | D2HGDH   | V338I  |
| 12q24.31 | 123771032 | rs9739070  | $1.3 \times 10^{-11}$ | 35187  | 0.943 | rs1060105  | SBNO1    | S729N  |
| 2q33.1   | 198943852 | rs2164068  | $1.6 \times 10^{-10}$ | 6388   | 0.984 | rs1064213  | PLCL1    | V667I  |
| 5q31.1   | 131995843 | rs1295686  | $5.5 \times 10^{-10}$ | 121    | 0.992 | rs20541    | IL13     | Q144R  |

## Nearby Expression QTLs

| region  | position  | our.name   | our.pval              | dist    | rsqr  | assay.name | eqtl.dist | eqtl.gene | eqtl.pval             | eqtl.rsqr | tissue                     | pubmed.id |
|---------|-----------|------------|-----------------------|---------|-------|------------|-----------|-----------|-----------------------|-----------|----------------------------|-----------|
| 6p21.32 | 32626403  | rs34004019 | $3.2 \times 10^{-24}$ | -23973  | 0.826 | rs17211510 | 24814     | HLA-DQB1  | 0.00011               | 0.187     | T-cell                     | 19644074  |
| 6p21.32 | 32626403  | rs34004019 | $3.2 \times 10^{-24}$ | 1503    | 0.518 | rs1063349  | 81213     | HLA-DQA2  | $2.2 \times 10^{-47}$ | 0.432     | Lymphoblastoid             | 24037378  |
| 6p21.32 | 32626403  | rs34004019 | $3.2 \times 10^{-24}$ | 10031   | 0.534 | rs9274660  | 40478     | HLA-DQA1  | $1.7 \times 10^{-56}$ | 0.493     | Lymphoblastoid             | 24037378  |
| 6p21.32 | 32626403  | rs34004019 | $3.2 \times 10^{-24}$ | 10031   | 0.534 | rs9274660  | 274       | HLA-DQB1  | $2.8 \times 10^{-61}$ | 0.522     | Lymphoblastoid             | 24037378  |
| 5q22.1  | 110467499 | rs1438673  | $3.2 \times 10^{-17}$ | -60757  | 0.778 | rs3806933  | 982       | TSLP      | $5.8 \times 10^{-9}$  | 0.088     | Lymphoblastoid             | 24037378  |
| 5q22.1  | 110467499 | rs1438673  | $3.2 \times 10^{-17}$ | -60757  | 0.778 | rs3806933  | 0         | TSLP      | $3.5 \times 10^{-11}$ | 0.454     | Esophagus_Mucosa           | 23715323  |
| 5q22.1  | 110467499 | rs1438673  | $3.2 \times 10^{-17}$ | -58432  | 0.778 | rs2289277  | 0         | TSLP      | $2.8 \times 10^{-8}$  | 0.286     | Skin_Sun_Exposed_Lower_leg | 23715323  |
| 5q22.1  | 110467499 | rs1438673  | $3.2 \times 10^{-17}$ | -58432  | 0.778 | rs2289277  | 0         | TSLP      | $3.0 \times 10^{-8}$  | 0.293     | Adipose_Subcutaneous       | 23715323  |
| 5q22.1  | 110467499 | rs1438673  | $3.2 \times 10^{-17}$ | -40171  | 0.826 | rs10050834 | 0         | TSLP      | $2.1 \times 10^{-12}$ | 0.390     | Artery_Tibial              | 23715323  |
| 5q22.1  | 110467499 | rs1438673  | $3.2 \times 10^{-17}$ | 254     | 0.836 | rs1438672  | 0         | TSLP      | $3.7 \times 10^{-8}$  | 0.287     | Thyroid                    | 23715323  |
| 4p14    | 38811051  | rs11727978 | $1.1 \times 10^{-15}$ | -331593 | 0.958 | rs5743592  | -5187     | TLR1      | $9.4 \times 10^{-7}$  |           | Liver                      | 18462017  |
| 4p14    | 38811051  | rs11727978 | $1.1 \times 10^{-15}$ | -267229 | 0.766 | rs17582830 | -92536    | TLR10     | $5.6 \times 10^{-18}$ | 0.300     | Lymphoblastoid             | 17873874  |

|          |           |            |                       |         |       |             |         |          |                       |       |                            |          |
|----------|-----------|------------|-----------------------|---------|-------|-------------|---------|----------|-----------------------|-------|----------------------------|----------|
| 4p14     | 38811051  | rs11727978 | 1.1×10 <sup>-15</sup> | -267229 | 0.766 | rs17582830  | -38898  | TLR6     | 2.5×10 <sup>-15</sup> | 0.258 | Lymphoblastoid             | 17873874 |
| 4p14     | 38811051  | rs11727978 | 1.1×10 <sup>-15</sup> | -267229 | 0.766 | rs17582830  | -69329  | TLR1     | 1.5×10 <sup>-14</sup> | 0.245 | Lymphoblastoid             | 17873874 |
| 4p14     | 38811051  | rs11727978 | 1.1×10 <sup>-15</sup> | -7988   | 0.958 | rs5743592   | 25160   | TLR6     | 1.4×10 <sup>-8</sup>  | 0.024 | Monocyte                   | 20502693 |
| 4p14     | 38811051  | rs11727978 | 1.1×10 <sup>-15</sup> | -5032   | 0.975 | rs5743563   | 22204   | TLR6     | 0.00013               | 0.183 | Lymphoblastoid             | 19644074 |
| 4p14     | 38811051  | rs11727978 | 1.1×10 <sup>-15</sup> | -4200   | 0.975 | rs5743556   | 51587   | TLR6     | 8.2×10 <sup>-14</sup> | 0.140 | Lymphoblastoid             | 24037378 |
| 4p14     | 38811051  | rs11727978 | 1.1×10 <sup>-15</sup> | -3687   | 0.957 | rs201774433 | 22753   | TLR10    | 1.4×10 <sup>-11</sup> | 0.116 | Lymphoblastoid             | 24037378 |
| 4p14     | 38811051  | rs11727978 | 1.1×10 <sup>-15</sup> | -2466   | 0.975 | rs114719937 | 49853   | TLR1     | 2.9×10 <sup>-12</sup> | 0.123 | Lymphoblastoid             | 24037378 |
| 4p14     | 38811051  | rs11727978 | 1.1×10 <sup>-15</sup> | -1127   | 0.983 | rs73236625  | 59374   | FAM114A1 | 2.1×10 <sup>-9</sup>  | 0.092 | Lymphoblastoid             | 24037378 |
| 17q12    | 38067020  | rs4795400  | 2.8×10 <sup>-15</sup> | -161913 | 0.708 | rs9747973   | 172206  | GSDMB    | 2.5×10 <sup>-8</sup>  | 0.080 | Lymphoblastoid             | 24037378 |
| 17q12    | 38067020  | rs4795400  | 2.8×10 <sup>-15</sup> | -90551  | 0.751 | rs9303277   | 100827  | ORMDL3   | 0.0                   | 0.402 | Lymphoblastoid             | 19644074 |
| 17q12    | 38067020  | rs4795400  | 2.8×10 <sup>-15</sup> | -90551  | 0.751 | rs9303277   | 0       | GSDMB    | 2.4×10 <sup>-13</sup> | 0.394 | Whole_Blood                | 23715323 |
| 17q12    | 38067020  | rs4795400  | 2.8×10 <sup>-15</sup> | -35882  | 0.817 | rs9905959   | 0       | PGAP3    | 9.7×10 <sup>-7</sup>  | 0.235 | Thyroid                    | 23715323 |
| 17q12    | 38067020  | rs4795400  | 2.8×10 <sup>-15</sup> | -17787  | 0.807 | rs12950743  | 24764   | ZBP2     | 1.5×10 <sup>-6</sup>  | 0.061 | Lymphoblastoid             | 24037378 |
| 17q12    | 38067020  | rs4795400  | 2.8×10 <sup>-15</sup> | -15672  | 0.781 | rs8067378   | 9500    | GSDML    | 2.6×10 <sup>-6</sup>  | 0.263 | Lymphoblastoid             | 19644074 |
| 17q12    | 38067020  | rs4795400  | 2.8×10 <sup>-15</sup> | -15672  | 0.781 | rs8067378   | 32506   | ORMDL3   | 9.1×10 <sup>-37</sup> | 0.352 | Lymphoblastoid             | 24037378 |
| 17q12    | 38067020  | rs4795400  | 2.8×10 <sup>-15</sup> | -10904  | 0.942 | rs11651596  | 0       | ORMDL3   | 5.7×10 <sup>-9</sup>  | 0.277 | Whole_Blood                | 23715323 |
| 17q12    | 38067020  | rs4795400  | 2.8×10 <sup>-15</sup> | 1023    | 0.818 | rs869402    | 47602   | IKZF3    | 3.0×10 <sup>-7</sup>  | 0.020 | Monocyte                   | 20502693 |
| 17q12    | 38067020  | rs4795400  | 2.8×10 <sup>-15</sup> | 21397   | 0.865 | rs4795405   | 0       | PGAP3    | 1.3×10 <sup>-7</sup>  | 0.334 | Esophagus_Muscularis       | 23715323 |
| 12q24.31 | 123771032 | rs9739070  | 1.3×10 <sup>-11</sup> | -313413 | 0.565 | rs7296418   | 0       | ABC9     | 1.2×10 <sup>-6</sup>  | 0.307 | Heart_Left_Ventricle       | 23715323 |
| 12q24.31 | 123771032 | rs9739070  | 1.3×10 <sup>-11</sup> | -198537 | 0.572 | rs10848428  | 378318  | SNRNP35  | 7.0×10 <sup>-5</sup>  | 0.055 | B-Cell                     | 22469664 |
| 12q24.31 | 123771032 | rs9739070  | 1.3×10 <sup>-11</sup> | -166979 | 0.655 | rs7975763   | 0       | MPHOSPH9 | 1.8×10 <sup>-7</sup>  | 0.328 | Esophagus_Muscularis       | 23715323 |
| 12q24.31 | 123771032 | rs9739070  | 1.3×10 <sup>-11</sup> | -152488 | 0.838 | rs1790116   | 18536   | MPHOSPH9 | 3.0×10 <sup>-16</sup> | 0.047 | Monocyte                   | 20502693 |
| 12q24.31 | 123771032 | rs9739070  | 1.3×10 <sup>-11</sup> | -144050 | 0.851 | rs1106240   | 118729  | CDK2AP1  | 8.4×10 <sup>-11</sup> | 0.141 | B-Cell                     | 22469664 |
| 12q24.31 | 123771032 | rs9739070  | 1.3×10 <sup>-11</sup> | -138102 | 0.720 | rs1727302   | 0       | ABC9     | 2.6×10 <sup>-6</sup>  | 0.215 | Skin_Sun_Exposed_Lower_leg | 23715323 |
| 12q24.31 | 123771032 | rs9739070  | 1.3×10 <sup>-11</sup> | -46152  | 0.936 | rs58809476  | 0       | CDK2AP1  | 1.2×10 <sup>-20</sup> | 0.698 | Esophagus_Mucosa           | 23715323 |
| 12q24.31 | 123771032 | rs9739070  | 1.3×10 <sup>-11</sup> | -31921  | 0.936 | rs1879380   | 6600    | CDK2AP1  | 1.3×10 <sup>-21</sup> | 0.279 | Monocyte                   | 22469664 |
| 12q24.31 | 123771032 | rs9739070  | 1.3×10 <sup>-11</sup> | -31921  | 0.936 | rs1879380   | 0       | 282O18.3 | 4.1×10 <sup>-20</sup> | 0.687 | Esophagus_Mucosa           | 23715323 |
| 12q24.31 | 123771032 | rs9739070  | 1.3×10 <sup>-11</sup> | -17     | 0.950 | rs71444571  | 0       | CDK2AP1  | 4.1×10 <sup>-7</sup>  | 0.244 | Skin_Sun_Exposed_Lower_leg | 23715323 |
| 12q24.31 | 123771032 | rs9739070  | 1.3×10 <sup>-11</sup> | 62489   | 0.880 | rs9300255   | 0       | CDK2AP1  | 3.8×10 <sup>-7</sup>  | 0.253 | Adipose_Subcutaneous       | 23715323 |
| 12q24.31 | 123771032 | rs9739070  | 1.3×10 <sup>-11</sup> | 62489   | 0.880 | rs9300255   | 0       | 282O18.3 | 2.1×10 <sup>-7</sup>  | 0.262 | Adipose_Subcutaneous       | 23715323 |
| 12q24.31 | 123771032 | rs9739070  | 1.3×10 <sup>-11</sup> | 114905  | 0.901 | rs28855757  | 129056  | CDK2AP1  | 1.0×10 <sup>-19</sup> | 0.200 | Lymphoblastoid             | 24037378 |
| 2p25.1   | 8450123   | rs367023   | 2.1×10 <sup>-11</sup> | -9091   | 0.627 | rs6734135   | 377943  | ID2      | 9.0×10 <sup>-10</sup> | 0.028 | Monocyte                   | 20502693 |
| 11q23.3  | 118675772 | rs11217036 | 9.3×10 <sup>-11</sup> | -427276 | 0.603 | rs12365699  | -122873 | DDX6     | 1.9×10 <sup>-5</sup>  |       | Liver                      | 18462017 |
| 11q23.3  | 118675772 | rs11217036 | 9.3×10 <sup>-11</sup> | -427276 | 0.603 | rs12365699  | 317693  | CCDC153  | 0.0016                |       | Liver                      | 18462017 |
| 11q23.3  | 118675772 | rs11217036 | 9.3×10 <sup>-11</sup> | -119374 | 0.555 | rs11216943  | 865608  | FXDY2    | 0.00026               | 0.168 | T-cell                     | 19644074 |
| 11q23.3  | 118675772 | rs11217036 | 9.3×10 <sup>-11</sup> | -114915 | 0.546 | rs73001406  | 0       | TREH     | 2.2×10 <sup>-6</sup>  | 0.266 | Esophagus_Mucosa           | 23715323 |
| 11q23.3  | 118675772 | rs11217036 | 9.3×10 <sup>-11</sup> | -47399  | 0.840 | rs74676029  | 0       | TREH     | 4.3×10 <sup>-8</sup>  | 0.429 | Stomach                    | 23715323 |
| 2q33.1   | 198943852 | rs2164068  | 1.6×10 <sup>-10</sup> | -63371  | 0.820 | rs1318867   | 67998   | PLCL1    | 3.0×10 <sup>-28</sup> | 0.083 | Monocyte                   | 20502693 |
| 2q33.1   | 198943852 | rs2164068  | 1.6×10 <sup>-10</sup> | -36709  | 0.857 | rs9712275   | 0       | PLCL1    | 3.0×10 <sup>-11</sup> | 0.341 | Whole_Blood                | 23715323 |
| 5q31.1   | 131995843 | rs1295686  | 5.5×10 <sup>-10</sup> | 602     | 0.963 | rs1295685   | -265463 | SLC22A5  | 0.00035               | 0.045 | B-Cell                     | 22469664 |
| 1q23.3   | 161187665 | rs2070902  | 1.0×10 <sup>-9</sup>  | -28518  | 0.932 | rs4233366   | 29543   | FCER1G   | 1.4×10 <sup>-11</sup> | 0.151 | Monocyte                   | 22469664 |
| 1q23.3   | 161187665 | rs2070902  | 1.0×10 <sup>-9</sup>  | -8981   | 0.557 | rs3924264   | 162917  | USF1     | 7.6×10 <sup>-15</sup> | 0.043 | Monocyte                   | 20502693 |
| 1q23.3   | 161187665 | rs2070902  | 1.0×10 <sup>-9</sup>  | 2048    | 0.549 | rs4489574   | 0       | FCER1G   | 2.7×10 <sup>-9</sup>  | 0.027 | Monocyte                   | 20502693 |
| 3q28     | 188119901 | rs2030519  | 3.1×10 <sup>-8</sup>  | -14845  | 0.947 | rs9864529   | 641581  | BCL6     | 5.2×10 <sup>-10</sup> | 0.028 | Monocyte                   | 20502693 |
| 17q21.32 | 47328183  | rs28397663 | 4.3×10 <sup>-8</sup>  | -47882  | 0.578 | rs4794029   | 3296    | GNGT2    | 1.5×10 <sup>-15</sup> | 0.045 | Monocyte                   | 20502693 |
| 17q21.32 | 47328183  | rs28397663 | 4.3×10 <sup>-8</sup>  | 120163  | 0.862 | rs12952581  | 719351  | ITGA3    | 1.7×10 <sup>-5</sup>  | 0.064 | B-Cell                     | 22469664 |

## Nearby Clinical Variants

| source  | region | our.name   | our.pval              | dist   | rsqr  | assay.name | gene | phenotype                 | accession         |
|---------|--------|------------|-----------------------|--------|-------|------------|------|---------------------------|-------------------|
| clinvar | 4p14   | rs11727978 | 1.1×10 <sup>-15</sup> | -11341 | 0.675 | rs4833095  | TLR1 | Leprosy 5                 | NCBI curation     |
| omim    | 4p14   | rs11727978 | 1.1×10 <sup>-15</sup> | -11341 | 0.675 | rs4833095  | TLR1 |                           |                   |
| clinvar | 5q31.1 | rs1295686  | 5.5×10 <sup>-10</sup> | 121    | 0.992 | rs20541    | IL13 | Asthma, susceptibility to | NCBI curation     |
| clinvar | 5q31.1 | rs1295686  | 5.5×10 <sup>-10</sup> | 121    | 0.992 | rs20541    | IL13 | Allergic rhinitis         | SNOMED CT61582004 |

## Shared Associations with Other 23andMe Phenotypes

| region  | position | our.name    | our.pval              | dist   | rsqr  | assay.name  | phenotype                      | pvalue                | gene.context    | match |
|---------|----------|-------------|-----------------------|--------|-------|-------------|--------------------------------|-----------------------|-----------------|-------|
| 1p36.23 | 8460247  | rs138050288 | 4.9×10 <sup>-11</sup> | -11843 | 0.510 | rs11121178  | PD_all_pop_con                 | 5.8×10 <sup>-7</sup>  | [RERE]          |       |
| 1p36.23 | 8460247  | rs138050288 | 4.9×10 <sup>-11</sup> | 0      | 1.000 | rs138050288 | any_animal_allergy             | 1.6×10 <sup>-10</sup> | [RERE]          | TRUE  |
| 1p36.23 | 8460247  | rs138050288 | 4.9×10 <sup>-11</sup> | 0      | 1.000 | rs138050288 | any_plant_allergy              | 5.6×10 <sup>-12</sup> | [RERE]          | TRUE  |
| 1p36.23 | 8460247  | rs138050288 | 4.9×10 <sup>-11</sup> | 0      | 1.000 | rs138050288 | dust_mites_allergy             | 1.2×10 <sup>-8</sup>  | [RERE]          | TRUE  |
| 1p36.23 | 8701288  | rs4908769   | 2.3×10 <sup>-12</sup> | 0      | 1.000 | rs4908769   | mold_allergy                   | 9.6×10 <sup>-8</sup>  | [RERE]          | TRUE  |
| 1p36.23 | 8701288  | rs4908769   | 2.3×10 <sup>-12</sup> | 0      | 1.000 | rs4908769   | seasonal_allergies_broad       | 3.2×10 <sup>-12</sup> | [RERE]          | TRUE  |
| 1p36.23 | 8817863  | rs12403640  | 1.7×10 <sup>-7</sup>  | 76483  | 0.853 | rs12068123  | tonsillectomy                  | 5.6×10 <sup>-9</sup>  | RERE--[ ]--ENO1 | FALSE |
| 1p34.3  | 35384605 | rs6699355   | 6.4×10 <sup>-5</sup>  | 0      | 1.000 | rs6699355   | iqb.nail_biting_frequency      | 1.1×10 <sup>-7</sup>  | ZMYM6NB         | FALSE |
| 1p31.1  | 72689882 | rs201048040 | 1.8×10 <sup>-5</sup>  | 0      | 1.000 | rs201048040 | any_immune                     | 3.1×10 <sup>-9</sup>  | [NEGR1]         | TRUE  |
| 1p31.1  | 72753112 | rs61765650  | 5.3×10 <sup>-6</sup>  | -28703 | 0.904 | rs34723450  | hayfever_all                   | 2.6×10 <sup>-8</sup>  | [NEGR1]         | TRUE  |
| 1p31.1  | 72729142 | rs1620977   | 9.2×10 <sup>-6</sup>  | 0      | 1.000 | rs1620977   | seasonal_allergies_broad       | 8.2×10 <sup>-7</sup>  | [NEGR1]         | TRUE  |
| 1p31.1  | 72729142 | rs1620977   | 9.2×10 <sup>-6</sup>  | 0      | 1.000 | rs1620977   | personality_ideas              | 3.9×10 <sup>-7</sup>  | [NEGR1]         | TRUE  |
| 1p31.1  | 72753112 | rs61765650  | 5.3×10 <sup>-6</sup>  | -8162  | 0.904 | rs34874247  | any_asthma                     | 4.6×10 <sup>-7</sup>  | [NEGR1]         | TRUE  |
| 1p31.1  | 72752230 | rs2815765   | 1.0×10 <sup>-5</sup>  | -3561  | 0.922 | rs3101339   | astigmatism                    | 2.0×10 <sup>-7</sup>  | NEGR1[ ]        | TRUE  |
| 1p31.1  | 72752230 | rs2815765   | 1.0×10 <sup>-5</sup>  | -3561  | 0.922 | rs3101339   | iqb.lost_20lbs                 | 1.6×10 <sup>-8</sup>  | NEGR1[ ]        | TRUE  |
| 1p31.1  | 72752230 | rs2815765   | 1.0×10 <sup>-5</sup>  | -3561  | 0.922 | rs3101339   | juvenile_obesity               | 6.9×10 <sup>-9</sup>  | NEGR1[ ]        | TRUE  |
| 1p31.1  | 72752230 | rs2815765   | 1.0×10 <sup>-5</sup>  | -3561  | 0.922 | rs3101339   | any_psychiatric                | 1.2×10 <sup>-7</sup>  | NEGR1[ ]        | TRUE  |
| 1p31.1  | 72752230 | rs2815765   | 1.0×10 <sup>-5</sup>  | -3561  | 0.922 | rs3101339   | depression                     | 2.4×10 <sup>-8</sup>  | NEGR1[ ]        | TRUE  |
| 1p31.1  | 72753112 | rs61765650  | 5.3×10 <sup>-6</sup>  | 844    | 0.991 | rs2568953   | heart_metabolic_disease_burden | 2.1×10 <sup>-12</sup> | NEGR1--[ ]      | TRUE  |
| 1p31.1  | 72752230 | rs2815765   | 1.0×10 <sup>-5</sup>  | 60899  | 1.000 | rs1460943   | obesity                        | 6.5×10 <sup>-10</sup> | NEGR1--[ ]      | TRUE  |
| 1p31.1  | 72752230 | rs2815765   | 1.0×10 <sup>-5</sup>  | 72914  | 0.933 | rs6699744   | bmi                            | 4.1×10 <sup>-26</sup> | NEGR1--[ ]      | TRUE  |
| 1p31.1  | 72752230 | rs2815765   | 1.0×10 <sup>-5</sup>  | 72914  | 0.933 | rs6699744   | weight                         | 7.8×10 <sup>-23</sup> | NEGR1--[ ]      | TRUE  |
| 1p31.1  | 72752230 | rs2815765   | 1.0×10 <sup>-5</sup>  | 85009  | 0.702 | rs7531118   | heart_metabolic_disease        | 2.9×10 <sup>-14</sup> | NEGR1--[ ]      | TRUE  |
| 1p31.1  | 72752230 | rs2815765   | 1.0×10 <sup>-5</sup>  | 85009  | 0.702 | rs7531118   | high_cholesterol_broad         | 6.5×10 <sup>-7</sup>  | NEGR1--[ ]      | TRUE  |

|        |           |             |                       |        |       |             |                                     |                       |                                    |       |
|--------|-----------|-------------|-----------------------|--------|-------|-------------|-------------------------------------|-----------------------|------------------------------------|-------|
| 1p31.1 | 72755105  | rs2568952   | $1.1 \times 10^{-5}$  | 97668  | 0.525 | rs1961767   | iqb.took_meds_depression_or_anxiety | $4.2 \times 10^{-7}$  | NEGR1---[]                         | TRUE  |
| 1p31.1 | 72764289  | rs2815757   | $5.8 \times 10^{-6}$  | 92702  | 0.586 | rs2613476   | any_plant_allergy                   | $1.5 \times 10^{-7}$  | NEGR1---[]                         | TRUE  |
| 1q21.3 | 154416935 | rs12753254  | $5.0 \times 10^{-5}$  | 1480   | 0.960 | rs11265613  | eczema                              | $3.7 \times 10^{-7}$  | [IL6R]                             | TRUE  |
| 1q21.3 | 154416935 | rs12753254  | $5.0 \times 10^{-5}$  | 2957   | 0.889 | rs12730933  | iqb.took_meds_anti_tnf_alpha        | $7.1 \times 10^{-7}$  | [IL6R]                             | FALSE |
| 1q21.3 | 154416935 | rs12753254  | $5.0 \times 10^{-5}$  | 10035  | 0.943 | rs2228145   | mosquito_severe                     | $1.3 \times 10^{-8}$  | [IL6R]                             | TRUE  |
| 1q21.3 | 154416935 | rs12753254  | $5.0 \times 10^{-5}$  | 11348  | 0.927 | rs12133641  | mosquito_combined                   | $3.8 \times 10^{-9}$  | [IL6R]                             | FALSE |
| 1q23.3 | 161187665 | rs2070902   | $1.0 \times 10^{-9}$  | -28518 | 0.932 | rs4233366   | allergic_asthma                     | $4.8 \times 10^{-8}$  | [JADAMTS4<br>B4GALT3--<br>]ADAMTS4 | TRUE  |
| 1q23.3 | 161187665 | rs2070902   | $1.0 \times 10^{-9}$  | -28518 | 0.932 | rs4233366   | any_asthma                          | $4.8 \times 10^{-15}$ | [JADAMTS4<br>B4GALT3--<br>]ADAMTS4 | TRUE  |
| 1q23.3 | 161187665 | rs2070902   | $1.0 \times 10^{-9}$  | -28518 | 0.932 | rs4233366   | any_plant_allergy                   | $3.4 \times 10^{-7}$  | [JADAMTS4<br>B4GALT3--<br>]ADAMTS4 | TRUE  |
| 1q23.3 | 161187665 | rs2070902   | $1.0 \times 10^{-9}$  | -28518 | 0.932 | rs4233366   | seasonal_allergies_broad            | $5.0 \times 10^{-9}$  | [JADAMTS4                          | TRUE  |
| 1q23.3 | 161187665 | rs2070902   | $1.0 \times 10^{-9}$  | 0      | 1.000 | rs2070902   | any_animal_allergy                  | $6.2 \times 10^{-10}$ | [FCER1G]                           | TRUE  |
| 1q23.3 | 161187665 | rs2070902   | $1.0 \times 10^{-9}$  | 0      | 1.000 | rs2070902   | hayfever_all                        | $8.3 \times 10^{-8}$  | [FCER1G]                           | TRUE  |
| 1q23.3 | 161187665 | rs2070902   | $1.0 \times 10^{-9}$  | 0      | 1.000 | rs2070902   | iqb.took_meds_asthma_or_lung        | $6.9 \times 10^{-8}$  | [FCER1G]                           | TRUE  |
| 1q24.2 | 167436300 | rs1617988   | $1.4 \times 10^{-6}$  | -16461 | 0.727 | rs2988279   | dust_mites_allergy                  | $1.7 \times 10^{-8}$  | [CD247]                            | TRUE  |
| 1q24.2 | 167436300 | rs1617988   | $1.4 \times 10^{-6}$  | -2880  | 0.795 | rs1723018   | any_asthma                          | $1.4 \times 10^{-8}$  | [CD247]                            | TRUE  |
| 1q24.2 | 167436300 | rs1617988   | $1.4 \times 10^{-6}$  | -2023  | 0.865 | rs2995091   | any_animal_allergy                  | $5.7 \times 10^{-8}$  | [CD247]                            | TRUE  |
| 1q31.1 | 190014535 | rs17374746  | $1.2 \times 10^{-5}$  | -14409 | 0.785 | rs12034854  | depression_anxiety_meds             | $1.1 \times 10^{-7}$  | [ ]--FAM5C                         | TRUE  |
| 1q31.1 | 190014535 | rs17374746  | $1.2 \times 10^{-5}$  | 40283  | 0.901 | rs11802882  | any_psychiatric                     | $5.5 \times 10^{-7}$  | [ ]--FAM5C                         | TRUE  |
| 1q31.1 | 190163532 | rs1855240   | $1.9 \times 10^{-5}$  | -33323 | 0.926 | rs1333321   | heart_metabolic_disease_burden      | $6.1 \times 10^{-7}$  | [FAM5C]                            | TRUE  |
| 1q31.1 | 190270315 | rs199810491 | $4.5 \times 10^{-5}$  | -54128 | 0.522 | rs1537429   | heart_metabolic_disease             | $2.4 \times 10^{-7}$  | [FAM5C]                            | TRUE  |
| 1q31.1 | 190335053 | rs1442568   | $1.7 \times 10^{-5}$  | 90736  | 0.680 | rs12089382  | bmi                                 | $4.4 \times 10^{-11}$ | [FAM5C]                            | TRUE  |
| 1q31.1 | 190335053 | rs1442568   | $1.7 \times 10^{-5}$  | 90736  | 0.680 | rs12089382  | weight                              | $8.6 \times 10^{-12}$ | [FAM5C]                            | TRUE  |
| 2p25.1 | 8450123   | rs367023    | $2.1 \times 10^{-11}$ | -11430 | 0.816 | rs346835    | mosquito_combined                   | $2.3 \times 10^{-13}$ | [ ]---ID2                          | FALSE |
| 2p25.1 | 8450123   | rs367023    | $2.1 \times 10^{-11}$ | -11430 | 0.816 | rs346835    | other_animal_allergy                | $4.1 \times 10^{-7}$  | [ ]---ID2                          | TRUE  |
| 2p25.1 | 8450123   | rs367023    | $2.1 \times 10^{-11}$ | 0      | 1.000 | rs367023    | any_animal_allergy                  | $9.9 \times 10^{-19}$ | [ ]---ID2                          | TRUE  |
| 2p25.1 | 8450123   | rs367023    | $2.1 \times 10^{-11}$ | 0      | 1.000 | rs367023    | any_food_allergy                    | $3.1 \times 10^{-10}$ | [ ]---ID2                          | TRUE  |
| 2p25.1 | 8450123   | rs367023    | $2.1 \times 10^{-11}$ | 0      | 1.000 | rs367023    | any_plant_allergy                   | $1.4 \times 10^{-11}$ | [ ]---ID2                          | TRUE  |
| 2p25.1 | 8450123   | rs367023    | $2.1 \times 10^{-11}$ | 0      | 1.000 | rs367023    | dust_mites_allergy                  | $1.5 \times 10^{-13}$ | [ ]---ID2                          | TRUE  |
| 2p25.1 | 8450123   | rs367023    | $2.1 \times 10^{-11}$ | 0      | 1.000 | rs367023    | hayfever_all                        | $7.5 \times 10^{-8}$  | [ ]---ID2                          | TRUE  |
| 2p25.1 | 8450123   | rs367023    | $2.1 \times 10^{-11}$ | 0      | 1.000 | rs367023    | mold_allergy                        | $2.2 \times 10^{-12}$ | [ ]---ID2                          | TRUE  |
| 2p25.1 | 8450123   | rs367023    | $2.1 \times 10^{-11}$ | 0      | 1.000 | rs367023    | mosquito_severe                     | $1.0 \times 10^{-7}$  | [ ]---ID2                          | TRUE  |
| 2p25.1 | 8450123   | rs367023    | $2.1 \times 10^{-11}$ | 0      | 1.000 | rs367023    | seasonal_allergies_broad            | $1.6 \times 10^{-11}$ | [ ]---ID2                          | TRUE  |
| 2p25.1 | 8450123   | rs367023    | $2.1 \times 10^{-11}$ | 7957   | 0.694 | rs13412757  | any_asthma                          | $1.3 \times 10^{-8}$  | [ ]---ID2                          | TRUE  |
| 2p25.1 | 8450123   | rs367023    | $2.1 \times 10^{-11}$ | 7957   | 0.694 | rs13412757  | insect_allergy                      | $3.9 \times 10^{-8}$  | [ ]---ID2                          | TRUE  |
| 2p23.2 | 28628595  | rs11340945  | $1.3 \times 10^{-5}$  | -23716 | 0.811 | rs906805    | rosacea_all                         | $5.5 \times 10^{-9}$  | BRE--[ ]--FOSL2                    | TRUE  |
| 2p23.2 | 28628595  | rs11340945  | $1.3 \times 10^{-5}$  | -966   | 0.906 | rs11127150  | rosacea_dx                          | $1.9 \times 10^{-8}$  | [FOSL2]                            | TRUE  |
| 2p23.2 | 28628595  | rs11340945  | $1.3 \times 10^{-5}$  | 18489  | 0.763 | rs1509394   | iqb.gray_amount                     | $4.8 \times 10^{-7}$  | FOSL2--[ ]--PLB1                   | TRUE  |
| 2q12.1 | 102773999 | rs2287048   | $2.4 \times 10^{-18}$ | -34178 | 0.956 | rs62156387  | iqb.recharge_by_socializing         | $9.0 \times 10^{-7}$  | IL1R2--[ ]--IL1R1                  | FALSE |
| 2q12.1 | 102932512 | rs950881    | $6.0 \times 10^{-27}$ | -18870 | 0.905 | rs202011557 | any_asthma                          | $5.1 \times 10^{-31}$ | IL1RL2--[ ]--<br>IL1RL1            | TRUE  |
| 2q12.1 | 102932512 | rs950881    | $6.0 \times 10^{-27}$ | -18298 | 0.937 | rs11690644  | any_immune                          | $1.4 \times 10^{-12}$ | IL1RL1                             | TRUE  |
| 2q12.1 | 102932512 | rs950881    | $6.0 \times 10^{-27}$ | -3895  | 0.958 | rs72823628  | juvenile_allergic_asthma            | $4.6 \times 10^{-18}$ | [IL1RL1]                           | TRUE  |
| 2q12.1 | 102932512 | rs950881    | $6.0 \times 10^{-27}$ | 0      | 1.000 | rs950881    | any_animal_allergy                  | $5.9 \times 10^{-37}$ | [IL1RL1]                           | TRUE  |
| 2q12.1 | 102932512 | rs950881    | $6.0 \times 10^{-27}$ | 0      | 1.000 | rs950881    | any_food_allergy                    | $1.9 \times 10^{-12}$ | [IL1RL1]                           | TRUE  |
| 2q12.1 | 102932512 | rs950881    | $6.0 \times 10^{-27}$ | 0      | 1.000 | rs950881    | any_plant_allergy                   | $1.6 \times 10^{-25}$ | [IL1RL1]                           | TRUE  |
| 2q12.1 | 102932512 | rs950881    | $6.0 \times 10^{-27}$ | 0      | 1.000 | rs950881    | dust_mites_allergy                  | $8.6 \times 10^{-27}$ | [IL1RL1]                           | TRUE  |
| 2q12.1 | 102932512 | rs950881    | $6.0 \times 10^{-27}$ | 0      | 1.000 | rs950881    | hayfever_all                        | $9.7 \times 10^{-18}$ | [IL1RL1]                           | TRUE  |
| 2q12.1 | 102932512 | rs950881    | $6.0 \times 10^{-27}$ | 0      | 1.000 | rs950881    | mold_allergy                        | $2.4 \times 10^{-23}$ | [IL1RL1]                           | TRUE  |
| 2q12.1 | 102932512 | rs950881    | $6.0 \times 10^{-27}$ | 0      | 1.000 | rs950881    | seasonal_allergies_broad            | $2.7 \times 10^{-28}$ | [IL1RL1]                           | TRUE  |
| 2q12.1 | 102932512 | rs950881    | $6.0 \times 10^{-27}$ | 8525   | 0.834 | rs11679893  | insect_allergy                      | $5.2 \times 10^{-8}$  | [IL1RL1]                           | TRUE  |
| 2q12.1 | 102932512 | rs950881    | $6.0 \times 10^{-27}$ | 27698  | 0.948 | rs3771175   | milk_allergy                        | $5.1 \times 10^{-8}$  | [IL1RL1]                           | TRUE  |
| 2q12.1 | 102966310 | rs10208293  | $1.5 \times 10^{-16}$ | 0      | 1.000 | rs10208293  | allergic_asthma                     | $7.7 \times 10^{-17}$ | [IL1RL1]                           | TRUE  |
| 2q12.1 | 102966310 | rs10208293  | $1.5 \times 10^{-16}$ | 0      | 1.000 | rs10208293  | juvenile_asthma                     | $2.6 \times 10^{-13}$ | [IL1RL1]                           | TRUE  |
| 2q12.1 | 102966310 | rs10208293  | $1.5 \times 10^{-16}$ | 0      | 1.000 | rs10208293  | other_animal_allergy                | $1.1 \times 10^{-10}$ | [IL1RL1]                           | TRUE  |
| 2q12.1 | 102932512 | rs950881    | $6.0 \times 10^{-27}$ | 34278  | 0.833 | rs10185897  | other_plant_allergy                 | $3.8 \times 10^{-7}$  | [IL1RL1]                           | TRUE  |
| 2q12.1 | 102932512 | rs950881    | $6.0 \times 10^{-27}$ | 64539  | 0.906 | rs72823677  | iqb.took_meds_asthma_or_lung        | $6.6 \times 10^{-22}$ | [IL18R1]                           | TRUE  |
| 2q12.1 | 102960210 | rs3771175   | $5.2 \times 10^{-26}$ | 97682  | 0.877 | rs11465702  | tree_nuts_allergy                   | $1.7 \times 10^{-7}$  | [IL18RAP]                          | TRUE  |
| 2q12.1 | 102966549 | rs10197862  | $7.4 \times 10^{-26}$ | 96971  | 0.917 | rs11465723  | any_drug_allergy                    | $3.5 \times 10^{-7}$  | [IL18RAP]                          | TRUE  |
| 2q32.1 | 188180409 | rs62174474  | $1.7 \times 10^{-5}$  | 0      | 1.000 | rs62174474  | any_drug_allergy                    | $1.1 \times 10^{-7}$  | ZSWIM2---[ ]--<br>CALCR1           | TRUE  |
| 2q33.1 | 198417987 | rs58837777  | $1.5 \times 10^{-6}$  | -89181 | 0.524 | rs2564388   | anxiety                             | $7.3 \times 10^{-7}$  | [COQ10B]                           | TRUE  |
| 2q33.1 | 198556418 | rs75909879  | $1.3 \times 10^{-5}$  | -71932 | 0.601 | rs6714697   | depression_anxiety_meds             | $5.2 \times 10^{-9}$  | [RFTN2]                            | TRUE  |
| 2q33.1 | 198494065 | rs61054961  | $8.2 \times 10^{-9}$  | 74011  | 0.577 | rs11687698  | any_skin_cancer                     | $3.3 \times 10^{-7}$  | RFTN2--[ ]--MARS2                  | TRUE  |
| 2q33.1 | 198943852 | rs2164068   | $1.6 \times 10^{-10}$ | -60900 | 0.862 | rs11681663  | morning_person                      | $7.3 \times 10^{-18}$ | [PLCL1]                            | FALSE |
| 2q33.1 | 198943852 | rs2164068   | $1.6 \times 10^{-10}$ | 0      | 1.000 | rs2164068   | any_animal_allergy                  | $3.7 \times 10^{-13}$ | [PLCL1]                            | TRUE  |
| 2q33.1 | 198943852 | rs2164068   | $1.6 \times 10^{-10}$ | 0      | 1.000 | rs2164068   | any_plant_allergy                   | $2.0 \times 10^{-11}$ | [PLCL1]                            | TRUE  |
| 2q33.1 | 198943852 | rs2164068   | $1.6 \times 10^{-10}$ | 0      | 1.000 | rs2164068   | seasonal_allergies_broad            | $4.7 \times 10^{-11}$ | [PLCL1]                            | TRUE  |
| 2q33.1 | 198943852 | rs2164068   | $1.6 \times 10^{-10}$ | 6388   | 0.984 | rs1064213   | dust_mites_allergy                  | $1.7 \times 10^{-11}$ | [PLCL1]                            | TRUE  |
| 2q33.1 | 199684067 | rs10931833  | $5.6 \times 10^{-5}$  | 85116  | 0.659 | rs1456522   | age_first_menses                    | $8.9 \times 10^{-10}$ | PLCL1---[ ]---<br>SATB2            | TRUE  |
| 2q33.3 | 208339634 | rs12618605  | $3.3 \times 10^{-5}$  | 0      | 1.000 | rs12618605  | any_immune                          | $2.4 \times 10^{-7}$  | KLF7---[ ]--CREB1                  | TRUE  |
| 2q36.3 | 228751874 | rs1721359   | $1.5 \times 10^{-5}$  | -12739 | 1.000 | rs6738964   | any_asthma                          | $4.7 \times 10^{-7}$  | [DAW1]                             | TRUE  |
| 2q36.3 | 228751874 | rs1721359   | $1.5 \times 10^{-5}$  | 0      | 1.000 | rs1721359   | any_animal_allergy                  | $1.7 \times 10^{-7}$  | [DAW1]                             | TRUE  |
| 2q36.3 | 229021373 | rs10933239  | $3.4 \times 10^{-5}$  | -3139  | 0.847 | rs61325615  | bmi                                 | $6.2 \times 10^{-7}$  | [SPHKAP]                           | TRUE  |
| 2q37.3 | 242692490 | rs35061832  | $2.8 \times 10^{-13}$ | -10461 | 0.724 | rs78147778  | any_immune                          | $1.2 \times 10^{-8}$  | [D2HGDH]                           | TRUE  |
| 2q37.3 | 242692490 | rs35061832  | $2.8 \times 10^{-13}$ | -10461 | 0.724 | rs78147778  | other_animal_allergy                | $7.6 \times 10^{-8}$  | [D2HGDH]                           | TRUE  |
| 2q37.3 | 242692490 | rs35061832  | $2.8 \times 10^{-13}$ | -1815  | 0.741 | rs1106639   | other_plant_allergy                 | $1.8 \times 10^{-8}$  | [D2HGDH]                           | TRUE  |
| 2q37.3 | 242692490 | rs35061832  | $2.8 \times 10^{-13}$ | 6150   | 0.636 | rs34290285  | allergic_asthma                     | $2.6 \times 10^{-13}$ | [D2HGDH]                           | TRUE  |
| 2q37.3 | 242692490 | rs35061832  | $2.8 \times 10^{-13}$ | 6150   | 0.636 | rs34290285  | any_animal_allergy                  | $9.9 \times 10^{-20}$ | [D2HGDH]                           | TRUE  |
| 2q37.3 | 242692490 | rs35061832  | $2.8 \times 10^{-13}$ | 6150   | 0.636 | rs34290285  | any_asthma                          | $1.8 \times 10^{-15}$ | [D2HGDH]                           | TRUE  |
| 2q37.3 | 242692490 | rs35061832  | $2.8 \times 10^{-13}$ | 6150   | 0.636 | rs34290285  | hayfever_all                        | $1.1 \times 10^{-10}$ | [D2HGDH]                           | TRUE  |
| 2q37.3 | 242692490 | rs35061832  | $2.8 \times 10^{-13}$ | 6150   | 0.636 | rs34290285  | juvenile_allergic_asthma            | $4.3 \times 10^{-9}$  | [D2HGDH]                           | TRUE  |
| 2q37.3 | 242692490 | rs35061832  | $2.8 \times 10^{-13}$ | 18792  | 0.525 | rs62192043  | iqb.took_meds_asthma_or_lung        | $5.6 \times 10^{-22}$ | D2HGDH--[ ]--<br>GAL3ST2           | TRUE  |
| 2q37.3 | 242703317 | rs146871826 | $1.5 \times 10^{-9}$  | 24692  | 0.526 | rs62193062  | any_plant_allergy                   | $8.6 \times 10^{-15}$ | [GAL3ST2]                          | TRUE  |



|         |           |                  |                       |        |       |                  |                               |                        |                                       |       |
|---------|-----------|------------------|-----------------------|--------|-------|------------------|-------------------------------|------------------------|---------------------------------------|-------|
| 2q37.3  | 242703317 | rs146871826      | $1.5 \times 10^{-9}$  | 24692  | 0.526 | rs62193062       | dust_mites_allergy            | $5.7 \times 10^{-11}$  | [GAL3ST2]                             | TRUE  |
| 2q37.3  | 242703317 | rs146871826      | $1.5 \times 10^{-9}$  | 24692  | 0.526 | rs62193062       | mold_allergy                  | $8.1 \times 10^{-11}$  | [GAL3ST2]                             | TRUE  |
| 2q37.3  | 242703317 | rs146871826      | $1.5 \times 10^{-9}$  | 24692  | 0.526 | rs62193062       | seasonal_allergies_broad      | $1.7 \times 10^{-18}$  | [GAL3ST2]                             | TRUE  |
| 2q37.3  | 242703363 | rs6754066        | $5.3 \times 10^{-9}$  | 36399  | 0.532 | rs73106178       | any_food_allergy              | $9.4 \times 10^{-8}$   | [GAL3ST2]                             | TRUE  |
| 3p12.1  | 85007576  | 3:85007576:C_CCA | $1.3 \times 10^{-5}$  | 0      | 1.000 | 3:85007576:C_CCA | any_drug_allergy              | $4.7 \times 10^{-8}$   | []CADM2                               | TRUE  |
| 3p12.1  | 85007576  | 3:85007576:C_CCA | $1.3 \times 10^{-5}$  | 0      | 1.000 | 3:85007576:C_CCA | penicillin_allergy            | $3.3 \times 10^{-7}$   | []CADM2                               | TRUE  |
| 3p12.1  | 85397224  | rs67824428       | $2.7 \times 10^{-6}$  | -632   | 0.531 | rs146511066      | personality_conscientiousness | $2.3 \times 10^{-7}$   | [CADM2]                               |       |
| 3p12.1  | 85518580  | rs2875907        | $1.0 \times 10^{-5}$  | -99009 | 0.503 | rs140717279      | personality_neuroticism       | $6.2 \times 10^{-7}$   | [CADM2]                               |       |
| 3p12.1  | 85592573  | rs143013783      | $7.5 \times 10^{-8}$  | -45775 | 0.616 | rs10433500       | iqb.adventurous               | $1.8 \times 10^{-9}$   | [CADM2]                               |       |
| 3p12.1  | 85579606  | rs62252499       | $8.7 \times 10^{-8}$  | 0      | 1.000 | rs62252499       | any_plant_allergy             | $8.4 \times 10^{-9}$   | [CADM2]                               | TRUE  |
| 3p12.1  | 85606521  | rs4856586        | $2.3 \times 10^{-7}$  | -2504  | 0.535 | rs199744186      | adhd_add_meds                 | $2.2 \times 10^{-9}$   | [CADM2]                               |       |
| 3q13.33 | 121715319 | rs9868257        | $2.8 \times 10^{-5}$  | 13527  | 0.849 | rs2001212        | any_immune                    | $5.4 \times 10^{-7}$   | [ILDR1]                               | TRUE  |
| 3q23    | 141093285 | rs7624084        | $8.3 \times 10^{-5}$  | -17201 | 0.612 | rs9866391        | nearsightedness               | $7.7 \times 10^{-19}$  | [ZBTB38]                              | FALSE |
| 3q23    | 141093285 | rs7624084        | $8.3 \times 10^{-5}$  | 0      | 1.000 | rs7624084        | myopia_v_hyperopia            | $3.7 \times 10^{-13}$  | [ZBTB38]                              | TRUE  |
| 3q23    | 141093285 | rs7624084        | $8.3 \times 10^{-5}$  | 924    | 0.905 | rs6440003        | haircolor                     | $1.1 \times 10^{-15}$  | [ZBTB38]                              | FALSE |
| 3q23    | 141093285 | rs7624084        | $8.3 \times 10^{-5}$  | 13660  | 0.744 | rs199550106      | any_animal_allergy            | $4.2 \times 10^{-7}$   | [ZBTB38]                              |       |
| 3q23    | 141093285 | rs7624084        | $8.3 \times 10^{-5}$  | 13669  | 0.811 | rs13077048       | farsightedness                | $5.9 \times 10^{-9}$   | [ZBTB38]                              | TRUE  |
| 3q23    | 141093285 | rs7624084        | $8.3 \times 10^{-5}$  | 13669  | 0.811 | rs13077048       | iqb.farsighted                | $7.3 \times 10^{-9}$   | [ZBTB38]                              | TRUE  |
| 3q23    | 141093285 | rs7624084        | $8.3 \times 10^{-5}$  | 24743  | 0.899 | rs13068733       | height                        | $9.1 \times 10^{-119}$ | [ZBTB38]                              | TRUE  |
| 3q23    | 141093285 | rs7624084        | $8.3 \times 10^{-5}$  | 47081  | 0.827 | rs6763927        | weight                        | $1.2 \times 10^{-24}$  | [ZBTB38]                              | TRUE  |
| 3q23    | 141093285 | rs7624084        | $8.3 \times 10^{-5}$  | 54129  | 0.801 | rs7650602        | shoe_size_normalized          | $4.8 \times 10^{-13}$  | [ZBTB38]                              | TRUE  |
| 3q23    | 141093285 | rs7624084        | $8.3 \times 10^{-5}$  | 56741  | 0.796 | rs7625643        | male_pattern_meta             | $4.0 \times 10^{-7}$   | [ZBTB38]                              | FALSE |
| 3q23    | 141093285 | rs7624084        | $8.3 \times 10^{-5}$  | 56741  | 0.796 | rs7625643        | iqb.stretch_marks             | $2.5 \times 10^{-7}$   | [ZBTB38]                              | TRUE  |
| 3q23    | 141093285 | rs7624084        | $8.3 \times 10^{-5}$  | 56741  | 0.796 | rs7625643        | stretch_marks_any             | $8.2 \times 10^{-7}$   | [ZBTB38]                              | TRUE  |
| 3q27.3  | 187643346 | rs2253944        | $2.5 \times 10^{-7}$  | -3971  | 0.889 | rs7633342        | other_animal_allergy          | $3.0 \times 10^{-7}$   | BCL6---[ ]---LPP                      | TRUE  |
| 3q28    | 188119901 | rs2030519        | $3.1 \times 10^{-8}$  | -31783 | 0.861 | rs11715549       | squamous_cell_carcinoma       | $8.7 \times 10^{-8}$   | [LPP]                                 | TRUE  |
| 3q28    | 188119901 | rs2030519        | $3.1 \times 10^{-8}$  | -27355 | 0.620 | rs191177147      | any_skin_cancer               | $8.1 \times 10^{-10}$  | [LPP]                                 | TRUE  |
| 3q28    | 188119901 | rs2030519        | $3.1 \times 10^{-8}$  | -27355 | 0.620 | rs191177147      | basal_cell_carcinoma          | $2.2 \times 10^{-11}$  | [LPP]                                 | TRUE  |
| 3q28    | 188119901 | rs2030519        | $3.1 \times 10^{-8}$  | -4669  | 1.000 | rs9834159        | any_non_melanoma_skin_cancer  | $1.5 \times 10^{-10}$  | [LPP]                                 | TRUE  |
| 3q28    | 188119901 | rs2030519        | $3.1 \times 10^{-8}$  | -2822  | 1.000 | rs6790260        | dust_mites_allergy            | $1.8 \times 10^{-11}$  | [LPP]                                 | TRUE  |
| 3q28    | 188119901 | rs2030519        | $3.1 \times 10^{-8}$  | 0      | 1.000 | rs2030519        | any_plant_allergy             | $7.1 \times 10^{-10}$  | [LPP]                                 | TRUE  |
| 3q28    | 188119901 | rs2030519        | $3.1 \times 10^{-8}$  | 0      | 1.000 | rs2030519        | seasonal_allergies_broad      | $2.4 \times 10^{-9}$   | [LPP]                                 | TRUE  |
| 3q28    | 188119901 | rs2030519        | $3.1 \times 10^{-8}$  | 5661   | 0.693 | rs200794374      | mosquito_combined             | $4.2 \times 10^{-9}$   | [LPP]                                 |       |
| 3q28    | 188119901 | rs2030519        | $3.1 \times 10^{-8}$  | 13538  | 0.869 | rs6808893        | any_animal_allergy            | $1.5 \times 10^{-16}$  | [LPP]                                 | TRUE  |
| 3q28    | 188119901 | rs2030519        | $3.1 \times 10^{-8}$  | 15882  | 0.665 | rs12485444       | hypothyroidism                | $5.5 \times 10^{-7}$   | [LPP]                                 | FALSE |
| 3q28    | 188398976 | rs113387455      | $4.6 \times 10^{-6}$  | 1581   | 0.764 | rs56328339       | any_immune                    | $1.8 \times 10^{-8}$   | [LPP]                                 | TRUE  |
| 3q28    | 188398976 | rs113387455      | $4.6 \times 10^{-6}$  | 3495   | 0.792 | rs73196739       | any_asthma                    | $6.5 \times 10^{-9}$   | [LPP]                                 | TRUE  |
| 3q29    | 196459301 | rs9847505        | $6.6 \times 10^{-5}$  | -22104 | 0.833 | rs9858181        | psoriasis                     | $1.2 \times 10^{-7}$   | [CEP19]                               | TRUE  |
| 4p15.1  | 28417524  | rs35543451       | $5.4 \times 10^{-5}$  | -30677 | 0.598 | rs10654614       | mold_allergy                  | $6.4 \times 10^{-7}$   | [ ]                                   |       |
| 4p14    | 38811051  | rs11727978       | $1.1 \times 10^{-15}$ | -23799 | 0.812 | rs67719080       | other_animal_allergy          | $1.2 \times 10^{-8}$   | TLR10-[ ]--TLR1                       | TRUE  |
| 4p14    | 38807654  | rs5743551        | $3.8 \times 10^{-15}$ | -9006  | 0.690 | rs5743618        | allergic_asthma               | $8.1 \times 10^{-11}$  | [TLR1]                                | TRUE  |
| 4p14    | 38807654  | rs5743551        | $3.8 \times 10^{-15}$ | -9006  | 0.690 | rs5743618        | any_animal_allergy            | $2.3 \times 10^{-31}$  | [TLR1]                                | TRUE  |
| 4p14    | 38807654  | rs5743551        | $3.8 \times 10^{-15}$ | -9006  | 0.690 | rs5743618        | any_asthma                    | $3.9 \times 10^{-11}$  | [TLR1]                                | TRUE  |
| 4p14    | 38807654  | rs5743551        | $3.8 \times 10^{-15}$ | -9006  | 0.690 | rs5743618        | any_plant_allergy             | $4.3 \times 10^{-23}$  | [TLR1]                                | TRUE  |
| 4p14    | 38807654  | rs5743551        | $3.8 \times 10^{-15}$ | -9006  | 0.690 | rs5743618        | dust_mites_allergy            | $2.3 \times 10^{-15}$  | [TLR1]                                | TRUE  |
| 4p14    | 38807654  | rs5743551        | $3.8 \times 10^{-15}$ | -9006  | 0.690 | rs5743618        | hayfever_all                  | $8.7 \times 10^{-13}$  | [TLR1]                                | TRUE  |
| 4p14    | 38807654  | rs5743551        | $3.8 \times 10^{-15}$ | -9006  | 0.690 | rs5743618        | iqb.took_meds_asthma_or_lung  | $3.4 \times 10^{-15}$  | [TLR1]                                | TRUE  |
| 4p14    | 38807654  | rs5743551        | $3.8 \times 10^{-15}$ | -9006  | 0.690 | rs5743618        | juvenile_allergic_asthma      | $4.9 \times 10^{-12}$  | [TLR1]                                | TRUE  |
| 4p14    | 38807654  | rs5743551        | $3.8 \times 10^{-15}$ | -9006  | 0.690 | rs5743618        | mold_allergy                  | $5.3 \times 10^{-10}$  | [TLR1]                                | TRUE  |
| 4p14    | 38807654  | rs5743551        | $3.8 \times 10^{-15}$ | -9006  | 0.690 | rs5743618        | seasonal_allergies_broad      | $2.4 \times 10^{-22}$  | [TLR1]                                | TRUE  |
| 4p14    | 38811051  | rs11727978       | $1.1 \times 10^{-15}$ | 35928  | 0.694 | rs7687447        | rosacea_all                   | $2.6 \times 10^{-9}$   | [TLR6]                                | TRUE  |
| 4p14    | 38811051  | rs11727978       | $1.1 \times 10^{-15}$ | 51070  | 0.705 | rs3860069        | any_food_allergy              | $6.3 \times 10^{-7}$   | TLR6-[ ]-FAM114A1BANK1---[ ]--SLC39A8 | TRUE  |
| 4q24    | 103188709 | rs13107325       | $9.7 \times 10^{-5}$  | -41821 | 0.820 | rs35225200       | iqb.rotator_cuff_tear         | $4.3 \times 10^{-7}$   | [SLC39A8]                             | TRUE  |
| 4q24    | 103188709 | rs13107325       | $9.7 \times 10^{-5}$  | 0      | 1.000 | rs13107325       | iqb.excess_hair               | $3.8 \times 10^{-8}$   | [SLC39A8]                             | TRUE  |
| 4q24    | 103188709 | rs13107325       | $9.7 \times 10^{-5}$  | 0      | 1.000 | rs13107325       | any_animal_allergy            | $2.3 \times 10^{-7}$   | [SLC39A8]                             | TRUE  |
| 4q24    | 103188709 | rs13107325       | $9.7 \times 10^{-5}$  | 0      | 1.000 | rs13107325       | bmi                           | $7.7 \times 10^{-30}$  | [SLC39A8]                             | TRUE  |
| 4q24    | 103188709 | rs13107325       | $9.7 \times 10^{-5}$  | 0      | 1.000 | rs13107325       | high_plasma_glucose           | $9.0 \times 10^{-7}$   | [SLC39A8]                             | TRUE  |
| 4q24    | 103188709 | rs13107325       | $9.7 \times 10^{-5}$  | 0      | 1.000 | rs13107325       | iqb.low_hdl                   | $3.6 \times 10^{-14}$  | [SLC39A8]                             | TRUE  |
| 4q24    | 103188709 | rs13107325       | $9.7 \times 10^{-5}$  | 0      | 1.000 | rs13107325       | obesity                       | $3.0 \times 10^{-9}$   | [SLC39A8]                             | TRUE  |
| 4q24    | 103188709 | rs13107325       | $9.7 \times 10^{-5}$  | 0      | 1.000 | rs13107325       | weight                        | $2.3 \times 10^{-17}$  | [SLC39A8]                             | TRUE  |
| 4q24    | 103188709 | rs13107325       | $9.7 \times 10^{-5}$  | 0      | 1.000 | rs13107325       | height                        | $6.0 \times 10^{-11}$  | [SLC39A8]                             | FALSE |
| 4q24    | 103188709 | rs13107325       | $9.7 \times 10^{-5}$  | 0      | 1.000 | rs13107325       | iqb.arthritis_any             | $2.2 \times 10^{-7}$   | [SLC39A8]                             | TRUE  |
| 4q24    | 103188709 | rs13107325       | $9.7 \times 10^{-5}$  | 0      | 1.000 | rs13107325       | osteoarthritis_broad          | $1.3 \times 10^{-8}$   | [SLC39A8]                             | TRUE  |
| 4q24    | 103188709 | rs13107325       | $9.7 \times 10^{-5}$  | 9373   | 0.931 | rs13135092       | iqb.stretch_marks             | $3.0 \times 10^{-10}$  | [SLC39A8]                             | TRUE  |
| 4q24    | 103188709 | rs13107325       | $9.7 \times 10^{-5}$  | 9373   | 0.931 | rs13135092       | stretch_marks_any             | $4.1 \times 10^{-9}$   | [SLC39A8]                             | TRUE  |
| 4q27    | 123215381 | rs28854492       | $4.2 \times 10^{-11}$ | 67781  | 0.878 | rs201757131      | allergic_asthma               | $8.4 \times 10^{-7}$   | [KIAA1109]                            |       |
| 4q27    | 123215381 | rs28854492       | $4.2 \times 10^{-11}$ | 67782  | 0.954 | rs33976078       | any_asthma                    | $8.5 \times 10^{-8}$   | [KIAA1109]                            |       |
| 4q27    | 123417564 | rs148505069      | $3.8 \times 10^{-11}$ | 0      | 1.000 | rs148505069      | any_immune                    | $4.3 \times 10^{-11}$  | IL2--[ ]---IL21                       | TRUE  |
| 4q27    | 123417564 | rs148505069      | $3.8 \times 10^{-11}$ | 0      | 1.000 | rs148505069      | any_plant_allergy             | $4.8 \times 10^{-10}$  | IL2--[ ]---IL21                       | TRUE  |
| 4q27    | 123417564 | rs148505069      | $3.8 \times 10^{-11}$ | 0      | 1.000 | rs148505069      | seasonal_allergies_broad      | $1.4 \times 10^{-10}$  | IL2--[ ]---IL21                       | TRUE  |
| 4q27    | 123417564 | rs148505069      | $3.8 \times 10^{-11}$ | 62920  | 0.591 | rs72669177       | dust_mites_allergy            | $3.0 \times 10^{-8}$   | IL2---[ ]--IL21                       | TRUE  |
| 4q27    | 123417564 | rs148505069      | $3.8 \times 10^{-11}$ | 62920  | 0.591 | rs72669177       | iqb.took_meds_asthma_or_lung  | $2.9 \times 10^{-7}$   | IL2---[ ]--IL21                       | TRUE  |
| 4q27    | 123417564 | rs148505069      | $3.8 \times 10^{-11}$ | 74853  | 0.782 | rs146583707      | any_animal_allergy            | $1.8 \times 10^{-15}$  | IL2---[ ]--IL21                       | TRUE  |
| 4q27    | 123417564 | rs148505069      | $3.8 \times 10^{-11}$ | 74853  | 0.782 | rs146583707      | mold_allergy                  | $8.2 \times 10^{-7}$   | IL2---[ ]--IL21                       | TRUE  |
| 5p15.1  | 16866472  | rs34875944       | $3.1 \times 10^{-5}$  | 3669   | 0.830 | rs6896380        | any_drug_allergy              | $9.2 \times 10^{-7}$   | [MYO10]                               | TRUE  |
| 5p15.1  | 16866472  | rs34875944       | $3.1 \times 10^{-5}$  | 3669   | 0.830 | rs6896380        | any_plant_allergy             | $5.1 \times 10^{-7}$   | [MYO10]                               | TRUE  |
| 5p15.1  | 16866472  | rs34875944       | $3.1 \times 10^{-5}$  | 3669   | 0.830 | rs6896380        | dust_mites_allergy            | $2.9 \times 10^{-9}$   | [MYO10]                               | TRUE  |
| 5p15.1  | 16866472  | rs34875944       | $3.1 \times 10^{-5}$  | 3669   | 0.830 | rs6896380        | seasonal_allergies_broad      | $8.6 \times 10^{-7}$   | [MYO10]                               | TRUE  |
| 5p13.2  | 35862841  | rs7717955        | $2.2 \times 10^{-7}$  | -59264 | 0.734 | rs931555         | any_autoimmune                | $7.7 \times 10^{-7}$   | [SPEF2]                               | TRUE  |
| 5p13.2  | 35862841  | rs7717955        | $2.2 \times 10^{-7}$  | -12692 | 0.987 | rs34463936       | eczema                        | $1.4 \times 10^{-11}$  | SPEF2--[ ]-IL7R                       | TRUE  |
| 5p13.2  | 35862841  | rs7717955        | $2.2 \times 10^{-7}$  | -5137  | 0.993 | rs11567694       | mold_allergy                  | $5.9 \times 10^{-9}$   | [IL7R]                                | TRUE  |
| 5p13.2  | 35862841  | rs7717955        | $2.2 \times 10^{-7}$  | -4991  | 0.993 | rs10213865       | any_animal_allergy            | $5.6 \times 10^{-8}$   | [IL7R]                                | TRUE  |
| 5p13.2  | 35862841  | rs7717955        | $2.2 \times 10^{-7}$  | 0      | 1.000 | rs7717955        | any_immune                    | $4.6 \times 10^{-9}$   | [IL7R]                                | TRUE  |
| 5p13.2  | 35862841  | rs7717955        | $2.2 \times 10^{-7}$  | 0      | 1.000 | rs7717955        | any_plant_allergy             | $1.9 \times 10^{-9}$   | [IL7R]                                | TRUE  |
| 5p13.2  | 35862841  | rs7717955        | $2.2 \times 10^{-7}$  | 0      | 1.000 | rs7717955        | seasonal_allergies_broad      | $1.1 \times 10^{-10}$  | [IL7R]                                | TRUE  |

|         |           |             |                       |        |       |             |                               |                       |                                  |       |
|---------|-----------|-------------|-----------------------|--------|-------|-------------|-------------------------------|-----------------------|----------------------------------|-------|
| 5p13.1  | 40492655  | rs7714574   | $7.7 \times 10^{-6}$  | -1865  | 0.942 | rs10440635  | hayfever_all                  | $1.5 \times 10^{-7}$  | [ ]---PTGER4                     | TRUE  |
| 5p13.1  | 40492655  | rs7714574   | $7.7 \times 10^{-6}$  | 0      | 1.000 | rs7714574   | any_animal_allergy            | $1.2 \times 10^{-10}$ | [ ]---PTGER4                     | TRUE  |
| 5p13.1  | 40492655  | rs7714574   | $7.7 \times 10^{-6}$  | 0      | 1.000 | rs7714574   | any_plant_allergy             | $4.0 \times 10^{-12}$ | [ ]---PTGER4                     | TRUE  |
| 5p13.1  | 40492655  | rs7714574   | $7.7 \times 10^{-6}$  | 0      | 1.000 | rs7714574   | seasonal_allergies_broad      | $7.9 \times 10^{-9}$  | [ ]---PTGER4<br>TMEM161B---[ ]-- | TRUE  |
| 5q14.3  | 88030670  | rs13158247  | $4.5 \times 10^{-5}$  | -37955 | 0.885 | rs5869436   | iqb.cry_easily                | $2.6 \times 10^{-9}$  | MEF2C<br>SLC25A46---[ ]---       | TRUE  |
| 5q22.1  | 110183117 | rs72776704  | $1.1 \times 10^{-6}$  | 28003  | 0.539 | rs200877516 | gerd_broad                    | $7.5 \times 10^{-7}$  | TSLP<br>SLC25A46---[ ]-          | TRUE  |
| 5q22.1  | 110401872 | rs1837253   | $1.1 \times 10^{-9}$  | 0      | 1.000 | rs1837253   | any_asthma                    | $3.3 \times 10^{-31}$ | TSLP<br>SLC25A46---[ ]-          | TRUE  |
| 5q22.1  | 110401872 | rs1837253   | $1.1 \times 10^{-9}$  | 0      | 1.000 | rs1837253   | hayfever_all                  | $1.5 \times 10^{-15}$ | TSLP<br>SLC25A46---[ ]-          | TRUE  |
| 5q22.1  | 110401872 | rs1837253   | $1.1 \times 10^{-9}$  | 0      | 1.000 | rs1837253   | iqb.took_meds_asthma_or_lung  | $1.8 \times 10^{-24}$ | TSLP<br>SLC25A46---[ ]-          | TRUE  |
| 5q22.1  | 110401872 | rs1837253   | $1.1 \times 10^{-9}$  | 0      | 1.000 | rs1837253   | juvenile_allergic_asthma      | $1.4 \times 10^{-13}$ | TSLP<br>SLC25A46---[ ]-          | TRUE  |
| 5q22.1  | 110401872 | rs1837253   | $1.1 \times 10^{-9}$  | 0      | 1.000 | rs1837253   | juvenile_asthma               | $2.8 \times 10^{-11}$ | TSLP<br>SLC25A46---[ ]-          | TRUE  |
| 5q22.1  | 110401872 | rs1837253   | $1.1 \times 10^{-9}$  | 0      | 1.000 | rs1837253   | mold_allergy                  | $5.0 \times 10^{-15}$ | TSLP                             | TRUE  |
| 5q22.1  | 110467499 | rs1438673   | $3.2 \times 10^{-17}$ | -37011 | 0.579 | rs17623144  | allergic_asthma               | $7.9 \times 10^{-14}$ | [WDR36]<br>WDR36-[ ]--           | TRUE  |
| 5q22.1  | 110467499 | rs1438673   | $3.2 \times 10^{-17}$ | 0      | 1.000 | rs1438673   | any_animal_allergy            | $1.2 \times 10^{-29}$ | CAMK4<br>WDR36-[ ]--             | TRUE  |
| 5q22.1  | 110467499 | rs1438673   | $3.2 \times 10^{-17}$ | 0      | 1.000 | rs1438673   | any_food_allergy              | $1.3 \times 10^{-8}$  | CAMK4<br>WDR36-[ ]--             | TRUE  |
| 5q22.1  | 110467499 | rs1438673   | $3.2 \times 10^{-17}$ | 0      | 1.000 | rs1438673   | any_plant_allergy             | $3.4 \times 10^{-19}$ | CAMK4<br>WDR36-[ ]--             | TRUE  |
| 5q22.1  | 110467499 | rs1438673   | $3.2 \times 10^{-17}$ | 0      | 1.000 | rs1438673   | dust_mites_allergy            | $2.8 \times 10^{-19}$ | CAMK4<br>WDR36-[ ]--             | TRUE  |
| 5q22.1  | 110467499 | rs1438673   | $3.2 \times 10^{-17}$ | 0      | 1.000 | rs1438673   | other_animal_allergy          | $1.7 \times 10^{-10}$ | CAMK4<br>WDR36-[ ]--             | TRUE  |
| 5q22.1  | 110467499 | rs1438673   | $3.2 \times 10^{-17}$ | 0      | 1.000 | rs1438673   | seasonal_allergies_broad      | $8.2 \times 10^{-21}$ | CAMK4<br>P4HA2-[ ]--             | TRUE  |
| 5q31.1  | 131580220 | rs6871350   | $2.9 \times 10^{-5}$  | -1612  | 0.969 | rs4705927   | mosquito_severe               | $8.1 \times 10^{-16}$ | PDLIM4                           | TRUE  |
| 5q31.1  | 131793772 | rs1023518   | $7.8 \times 10^{-7}$  | 10195  | 0.748 | rs10060626  | high_cholesterol_broad        | $8.7 \times 10^{-7}$  | C5orf56-[ ]--IRF1                | TRUE  |
| 5q31.1  | 131989136 | rs3091307   | $3.8 \times 10^{-6}$  | -87911 | 0.983 | rs2244012   | any_asthma                    | $2.1 \times 10^{-16}$ | [RAD50]                          | TRUE  |
| 5q31.1  | 131989136 | rs3091307   | $3.8 \times 10^{-6}$  | 0      | 1.000 | rs3091307   | mold_allergy                  | $2.3 \times 10^{-7}$  | RAD50-[ ]-IL13                   | TRUE  |
| 5q31.1  | 131995843 | rs1295686   | $5.5 \times 10^{-10}$ | 0      | 1.000 | rs1295686   | seasonal_allergies_broad      | $1.1 \times 10^{-8}$  | [IL13]                           | TRUE  |
| 5q31.1  | 131995843 | rs1295686   | $5.5 \times 10^{-10}$ | 121    | 0.992 | rs20541     | psoriasis                     | $7.2 \times 10^{-12}$ | [IL13]                           | FALSE |
| 5q31.1  | 131995843 | rs1295686   | $5.5 \times 10^{-10}$ | 121    | 0.992 | rs20541     | other_animal_allergy          | $8.6 \times 10^{-7}$  | [IL13]                           | TRUE  |
| 5q31.1  | 131995843 | rs1295686   | $5.5 \times 10^{-10}$ | 121    | 0.992 | rs20541     | iqb.shampoo_type              | $3.8 \times 10^{-7}$  | [IL13]                           | FALSE |
| 5q31.1  | 131995843 | rs1295686   | $5.5 \times 10^{-10}$ | 121    | 0.992 | rs20541     | rosacea_all                   | $1.4 \times 10^{-17}$ | [IL13]                           | FALSE |
| 5q31.1  | 131995843 | rs1295686   | $5.5 \times 10^{-10}$ | 121    | 0.992 | rs20541     | rosacea_dx                    | $2.4 \times 10^{-7}$  | [IL13]                           | FALSE |
| 5q31.1  | 131995843 | rs1295686   | $5.5 \times 10^{-10}$ | 602    | 0.963 | rs1295685   | iqb.alcohol_flush             | $3.4 \times 10^{-9}$  | [IL13]                           | FALSE |
| 5q31.1  | 131995843 | rs1295686   | $5.5 \times 10^{-10}$ | 657    | 0.963 | rs848       | any_animal_allergy            | $1.9 \times 10^{-13}$ | [IL13]                           | TRUE  |
| 5q31.1  | 131995843 | rs1295686   | $5.5 \times 10^{-10}$ | 657    | 0.963 | rs848       | any_food_allergy              | $1.6 \times 10^{-7}$  | [IL13]                           | TRUE  |
| 5q31.1  | 131995843 | rs1295686   | $5.5 \times 10^{-10}$ | 657    | 0.963 | rs848       | any_plant_allergy             | $1.5 \times 10^{-10}$ | [IL13]                           | TRUE  |
| 5q31.1  | 131995843 | rs1295686   | $5.5 \times 10^{-10}$ | 657    | 0.963 | rs848       | dust_mites_allergy            | $2.6 \times 10^{-7}$  | [IL13]                           | TRUE  |
| 5q31.1  | 131995843 | rs1295686   | $5.5 \times 10^{-10}$ | 657    | 0.963 | rs848       | eczema                        | $7.9 \times 10^{-21}$ | [IL13]                           | TRUE  |
| 5q31.1  | 131995843 | rs1295686   | $5.5 \times 10^{-10}$ | 657    | 0.963 | rs848       | insect_allergy                | $3.3 \times 10^{-7}$  | [IL13]                           | TRUE  |
| 5q31.1  | 131995843 | rs1295686   | $5.5 \times 10^{-10}$ | 657    | 0.963 | rs848       | iqb.took_meds_asthma_or_lung  | $1.2 \times 10^{-10}$ | [IL13]                           | TRUE  |
| 5q31.1  | 131999494 | rs2243204   | $3.2 \times 10^{-7}$  | 1892   | 0.675 | rs2243210   | other_food_allergy            | $5.3 \times 10^{-7}$  | IL13-[ ]-IL4                     | TRUE  |
| 5q31.1  | 132007974 | rs34142320  | $8.9 \times 10^{-6}$  | 0      | 1.000 | rs34142320  | peanut_allergy                | $3.2 \times 10^{-8}$  | IL13-[ ]-IL4<br>ZMAT2---[ ]--    | TRUE  |
| 5q31.3  | 140222157 | rs3733705   | $1.5 \times 10^{-5}$  | -35220 | 0.742 | rs11167605  | dust_mites_allergy            | $4.0 \times 10^{-8}$  | AX746964<br>GNPDA1-[ ]--         | TRUE  |
| 5q31.3  | 141489921 | rs12653866  | $5.4 \times 10^{-5}$  | -43618 | 0.560 | rs12654522  | any_autoimmune                | $3.5 \times 10^{-7}$  | NDFIP1                           | TRUE  |
| 5q31.3  | 141516479 | rs72418053  | $1.1 \times 10^{-5}$  | -21545 | 0.676 | rs10068717  | any_animal_allergy            | $3.3 \times 10^{-7}$  | [NDFIP1]                         | TRUE  |
| 5q31.3  | 141516479 | rs72418053  | $1.1 \times 10^{-5}$  | 0      | 1.000 | rs72418053  | any_immune                    | $1.3 \times 10^{-7}$  | [NDFIP1]                         | TRUE  |
| 5q31.3  | 141516479 | rs72418053  | $1.1 \times 10^{-5}$  | 13282  | 0.594 | rs200634877 | any_asthma                    | $2.5 \times 10^{-8}$  | [NDFIP1]                         | TRUE  |
| 6p22.1  | 28331818  | rs35875412  | $7.4 \times 10^{-5}$  | -90829 | 0.503 | rs202185649 | vitiligo                      | $4.6 \times 10^{-8}$  | [ZSCAN26]<br>PGBD1[ ]--          | TRUE  |
| 6p22.1  | 28331818  | rs35875412  | $7.4 \times 10^{-5}$  | -61234 | 0.671 | rs2799081   | nearsightedness               | $1.2 \times 10^{-12}$ | ZSCAN31                          | TRUE  |
| 6p22.1  | 28400295  | rs7765989   | $3.9 \times 10^{-5}$  | -99959 | 0.841 | rs17312661  | adh_add_meds                  | $3.4 \times 10^{-7}$  | [ZSCAN31]<br>ZSCAN31-[ ]--       | FALSE |
| 6p22.1  | 28400295  | rs7765989   | $3.9 \times 10^{-5}$  | -94432 | 0.838 | rs140136728 | dental_superstar              | $5.6 \times 10^{-7}$  | ZKSCAN3<br>ZSCAN31-[ ]-          | TRUE  |
| 6p22.1  | 28400295  | rs7765989   | $3.9 \times 10^{-5}$  | -88874 | 0.820 | rs6456816   | nose_concavity                | $9.5 \times 10^{-7}$  | ZKSCAN3<br>SCAND3-[ ]---         | FALSE |
| 6p22.1  | 28565827  | rs6901724   | $6.8 \times 10^{-6}$  | 0      | 1.000 | rs6901724   | mold_allergy                  | $8.1 \times 10^{-7}$  | TRIM27                           | TRUE  |
| 6p22.1  | 29910717  | rs1064588   | $5.2 \times 10^{-11}$ | 0      | 1.000 | rs1064588   | dust_mites_allergy            | $4.1 \times 10^{-7}$  | [HLA-A]                          | TRUE  |
| 6p22.1  | 29910717  | rs1064588   | $5.2 \times 10^{-11}$ | 0      | 1.000 | rs1064588   | mold_allergy                  | $4.3 \times 10^{-7}$  | [HLA-A]                          | TRUE  |
| 6p22.1  | 30024677  | rs9366752   | $4.2 \times 10^{-6}$  | 15614  | 0.864 | rs10947050  | chicken_pox                   | $1.1 \times 10^{-10}$ | [RNF39]<br>MUC22-[ ]--           | TRUE  |
| 6p21.33 | 31043568  | rs78868039  | $5.8 \times 10^{-5}$  | -6690  | 0.534 | rs62399063  | blood_sugar_meds              | $3.9 \times 10^{-8}$  | C6orf15                          | TRUE  |
| 6p21.33 | 31219982  | rs9264185   | $3.1 \times 10^{-5}$  | -28346 | 0.643 | rs1639110   | any_autoimmune                | $8.1 \times 10^{-70}$ | HCG27-[ ]--HLA-C                 | TRUE  |
| 6p21.33 | 31359394  | rs762460    | $5.4 \times 10^{-9}$  | -59197 | 0.564 | rs79158921  | depression_anxiety_meds       | $4.3 \times 10^{-10}$ | [HLA-C]-[ ]-MICA                 | FALSE |
| 6p21.33 | 31300247  | rs76819587  | $1.2 \times 10^{-5}$  | 2037   | 0.512 | rs4947308   | iqb.iodine_treatment_ever     | $1.2 \times 10^{-9}$  | HLA-C-[ ]-MICA                   | FALSE |
| 6p21.33 | 31414906  | rs2516465   | $1.5 \times 10^{-14}$ | -92709 | 0.561 | rs2428494   | allergic_asthma               | $6.6 \times 10^{-10}$ | HLA-C-[ ]-MICA                   | TRUE  |
| 6p21.33 | 31414906  | rs2516465   | $1.5 \times 10^{-14}$ | -92709 | 0.561 | rs2428494   | juvenile_allergic_asthma      | $2.2 \times 10^{-9}$  | HLA-C-[ ]-MICA                   | TRUE  |
| 6p21.33 | 31324641  | rs1050518   | $7.9 \times 10^{-11}$ | 23     | 0.646 | rs9266184   | any_skin_cancer               | $1.5 \times 10^{-7}$  | [HLA-C]-[ ]-MICA                 | FALSE |
| 6p21.33 | 31326251  | rs9405084   | $3.2 \times 10^{-8}$  | 1083   | 0.512 | rs2523589   | acid_reflux                   | $9.0 \times 10^{-7}$  | HLA-C-[ ]-MICA                   | FALSE |
| 6p21.33 | 31355957  | rs67643039  | $1.1 \times 10^{-6}$  | 3018   | 0.527 | rs13196525  | iqb.dandruff_frequency        | $8.8 \times 10^{-8}$  | HLA-C---[ ]-MICA                 | FALSE |
| 6p21.33 | 31359394  | rs762460    | $5.4 \times 10^{-9}$  | 4037   | 0.596 | rs10649173  | cavities_many                 | $5.2 \times 10^{-7}$  | HLA-C---[ ]-MICA                 | TRUE  |
| 6p21.33 | 31359394  | rs762460    | $5.4 \times 10^{-9}$  | 4037   | 0.596 | rs10649173  | number_of_cavities            | $1.5 \times 10^{-8}$  | HLA-C---[ ]-MICA                 | TRUE  |
| 6p21.33 | 31371521  | rs2252223   | $4.7 \times 10^{-12}$ | -6918  | 0.787 | rs2905708   | other_animal_allergy          | $8.6 \times 10^{-9}$  | HLA-C---[ ]-MICA                 | TRUE  |
| 6p21.33 | 31412948  | rs2596465   | $6.8 \times 10^{-7}$  | 0      | 1.000 | rs2596465   | iqb.mononucleosis             | $2.5 \times 10^{-9}$  | MICA-[ ]-MICA                    | FALSE |
| 6p21.33 | 31419065  | rs3130901   | $9.5 \times 10^{-7}$  | -5256  | 0.563 | rs9267091   | iqb.ever_diagnosed_autoimmune | $6.9 \times 10^{-21}$ | MICA-[ ]-MICA                    | TRUE  |
| 6p21.33 | 31574525  | rs28895016  | $4.0 \times 10^{-7}$  | 59308  | 0.610 | rs369630161 | gender_difference_male        | $4.4 \times 10^{-7}$  | [CSNK2B]                         | TRUE  |
| 6p21.33 | 31749804  | rs743399    | $2.3 \times 10^{-6}$  | 74511  | 0.616 | rs2395079   | juvenile_asthma               | $4.3 \times 10^{-7}$  | C6orf48-[ ]-NEU1                 | TRUE  |
| 6p21.33 | 31941629  | rs116420479 | $6.3 \times 10^{-7}$  | -11278 | 0.530 | rs2734331   | iqb.low_hdl                   | $3.6 \times 10^{-7}$  | [SKIV2L]                         | FALSE |
| 6p21.33 | 31894626  | rs3020644   | $1.9 \times 10^{-5}$  | 78390  | 0.532 | rs28361032  | tongue_flip                   | $1.9 \times 10^{-7}$  | C4B_2-[ ]CYP21A2                 | TRUE  |
| 6p21.32 | 32127477  | rs3134950   | $3.1 \times 10^{-6}$  | -20338 | 0.602 | rs3096698   | any_cvd                       | $1.2 \times 10^{-9}$  | FKBPL-[ ]-PRRT1                  | TRUE  |
| 6p21.32 | 32127477  | rs3134950   | $3.1 \times 10^{-6}$  | -20338 | 0.602 | rs3096698   | blood_pressure_meds           | $6.3 \times 10^{-10}$ | FKBPL-[ ]-PRRT1                  | TRUE  |

|         |           |             |                       |        |       |             |                              |                       |                              |       |
|---------|-----------|-------------|-----------------------|--------|-------|-------------|------------------------------|-----------------------|------------------------------|-------|
| 6p21.32 | 32127477  | rs3134950   | $3.1 \times 10^{-6}$  | -20338 | 0.602 | rs3096698   | high_blood_pressure          | $3.0 \times 10^{-9}$  | FKBPL-[]-PRRT1               | TRUE  |
| 6p21.32 | 32109979  | rs204999    | $8.6 \times 10^{-9}$  | 39837  | 0.545 | rs3134940   | bmi                          | $2.3 \times 10^{-8}$  | [RNF5,AGER]<br>HLA-DRA--[]-- | TRUE  |
| 6p21.32 | 32383050  | rs4959027   | $3.0 \times 10^{-6}$  | 46532  | 0.558 | rs9268851   | multiple_sclerosis           | $5.3 \times 10^{-85}$ | HLA-DRB5<br>HLA-DRB5--[]--   | TRUE  |
| 6p21.32 | 32573471  | rs9270965   | $2.5 \times 10^{-5}$  | -12047 | 0.657 | rs9270591   | eczema                       | $3.0 \times 10^{-9}$  | HLA-DQA1<br>HLA-DRB5--[]--   | FALSE |
| 6p21.32 | 32667595  | rs1794279   | $4.6 \times 10^{-5}$  | -89962 | 0.656 | rs535777    | hyperthyroidism              | $5.8 \times 10^{-19}$ | HLA-DQA1<br>HLA-DRB5--[]--   | TRUE  |
| 6p21.32 | 32583490  | rs35534739  | $8.0 \times 10^{-7}$  | -878   | 0.522 | rs3104414   | rheumatoid_arthritis         | $2.8 \times 10^{-39}$ | HLA-DQA1<br>HLA-DRB5--[]--   | FALSE |
| 6p21.32 | 32586934  | rs141215917 | $2.1 \times 10^{-6}$  | -2640  | 0.598 | rs36014219  | actinic_keratosi             | $5.8 \times 10^{-7}$  | HLA-DQA1<br>HLA-DRB5--[]--   | TRUE  |
| 6p21.32 | 32627714  | rs1063355   | $4.3 \times 10^{-13}$ | -40305 | 0.503 | rs9271385   | juvenile_asthma              | $3.2 \times 10^{-11}$ | HLA-DQA1<br>HLA-DRB5--[]--   | TRUE  |
| 6p21.32 | 32571897  | rs12211942  | $2.9 \times 10^{-6}$  | 16657  | 0.618 | rs9271465   | iqb.bronchitis_frequency     | $1.6 \times 10^{-15}$ | HLA-DQA1<br>HLA-DRB5--[]--   | TRUE  |
| 6p21.32 | 32570184  | rs2516051   | $7.7 \times 10^{-5}$  | 21153  | 0.522 | rs9271601   | any_skin_cancer              | $7.6 \times 10^{-10}$ | HLA-DQA1<br>HLA-DRB5--[]--   | FALSE |
| 6p21.32 | 32604124  | rs9272320   | $2.7 \times 10^{-10}$ | -12741 | 0.529 | rs9271602   | milk_allergy                 | $7.0 \times 10^{-7}$  | HLA-DQA1<br>HLA-DRB5---[]-   | TRUE  |
| 6p21.32 | 32602617  | rs9272231   | $1.3 \times 10^{-5}$  | -221   | 0.520 | rs9272226   | iqb.plantar_warts            | $1.8 \times 10^{-40}$ | HLA-DQA1<br>HLA-DRB5---[]-   | TRUE  |
| 6p21.32 | 32626403  | rs34004019  | $3.2 \times 10^{-24}$ | -22987 | 0.808 | rs9272266   | any_immune                   | $1.2 \times 10^{-20}$ | HLA-DQA1<br>HLA-DRB5---[]-   | TRUE  |
| 6p21.32 | 32626403  | rs34004019  | $3.2 \times 10^{-24}$ | -22987 | 0.808 | rs9272266   | hayfever_all                 | $4.4 \times 10^{-19}$ | HLA-DQA1<br>HLA-DRB5---[]-   | TRUE  |
| 6p21.32 | 32626403  | rs34004019  | $3.2 \times 10^{-24}$ | -22916 | 0.504 | rs3104367   | allergic_asthma              | $3.4 \times 10^{-13}$ | HLA-DQA1<br>HLA-DRB5---[]-   | TRUE  |
| 6p21.32 | 32626403  | rs34004019  | $3.2 \times 10^{-24}$ | -22916 | 0.504 | rs3104367   | any_asthma                   | $1.0 \times 10^{-40}$ | HLA-DQA1<br>HLA-DRB5---[]-   | TRUE  |
| 6p21.32 | 32626403  | rs34004019  | $3.2 \times 10^{-24}$ | -22916 | 0.504 | rs3104367   | iqb.took_meds_asthma_or_lung | $5.3 \times 10^{-39}$ | HLA-DQA1<br>HLA-DQA1--       | TRUE  |
| 6p21.32 | 32626403  | rs34004019  | $3.2 \times 10^{-24}$ | 0      | 1.000 | rs34004019  | any_animal_allergy           | $2.6 \times 10^{-48}$ | []HLA-DQB1<br>HLA-DQA1--     | TRUE  |
| 6p21.32 | 32626403  | rs34004019  | $3.2 \times 10^{-24}$ | 0      | 1.000 | rs34004019  | any_food_allergy             | $1.6 \times 10^{-9}$  | []HLA-DQB1<br>HLA-DQA1--     | TRUE  |
| 6p21.32 | 32626403  | rs34004019  | $3.2 \times 10^{-24}$ | 0      | 1.000 | rs34004019  | any_plant_allergy            | $3.1 \times 10^{-30}$ | []HLA-DQB1<br>HLA-DQA1--     | TRUE  |
| 6p21.32 | 32626403  | rs34004019  | $3.2 \times 10^{-24}$ | 0      | 1.000 | rs34004019  | other_animal_allergy         | $1.1 \times 10^{-18}$ | []HLA-DQB1<br>HLA-DQA1--     | TRUE  |
| 6p21.32 | 32626403  | rs34004019  | $3.2 \times 10^{-24}$ | 0      | 1.000 | rs34004019  | seasonal_allergies_broad     | $4.1 \times 10^{-30}$ | []HLA-DQB1<br>HLA-DQA1--     | TRUE  |
| 6p21.32 | 32667595  | rs1794279   | $4.6 \times 10^{-5}$  | -41111 | 0.672 | rs9273369   | iqb.celiac_w_biopsy          | $4.6 \times 10^{-75}$ | []HLA-DQB1<br>HLA-DQA1--     | TRUE  |
| 6p21.32 | 32626537  | rs28672722  | $1.4 \times 10^{-18}$ | -45    | 0.527 | rs9273370   | hypothyroidism               | $4.5 \times 10^{-34}$ | []HLA-DQB1<br>HLA-DQA1--     | TRUE  |
| 6p21.32 | 32636235  | rs9274652   | $4.3 \times 10^{-16}$ | -9336  | 0.510 | rs4713571   | dust_mites_allergy           | $7.3 \times 10^{-19}$ | []HLA-DQB1<br>HLA-DQA1--     | TRUE  |
| 6p21.32 | 32636235  | rs9274652   | $4.3 \times 10^{-16}$ | -9336  | 0.510 | rs4713571   | mold_allergy                 | $4.8 \times 10^{-17}$ | []HLA-DQB1                   | TRUE  |
| 6p21.32 | 32626696  | rs34865969  | $2.6 \times 10^{-6}$  | 1242   | 0.569 | rs36205178  | scarlet_fever                | $9.5 \times 10^{-14}$ | [HLA-DQB1]                   | FALSE |
| 6p21.32 | 32627923  | rs1063348   | $7.9 \times 10^{-14}$ | 44     | 0.822 | rs1063346   | juvenile_allergic_asthma     | $6.3 \times 10^{-13}$ | [HLA-DQB1]                   | TRUE  |
| 6p21.32 | 32627934  | rs2733463   | $1.9 \times 10^{-13}$ | 6168   | 0.522 | rs200464814 | any_drug_allergy             | $1.6 \times 10^{-8}$  | [HLA-DQB1]                   | TRUE  |
| 6p21.32 | 32667473  | rs1794514   | $1.0 \times 10^{-5}$  | -15832 | 0.523 | rs3134977   | iqb.gluten_intolerance       | $1.9 \times 10^{-40}$ | HLA-DQA2<br>HLA-DQB1--[]--   | TRUE  |
| 6p21.32 | 32626492  | rs9273370   | $2.2 \times 10^{-8}$  | 27234  | 0.504 | rs9275170   | acid_reflux_meds             | $6.8 \times 10^{-10}$ | HLA-DQA2<br>HLA-DQB1--[]--   | TRUE  |
| 6p21.32 | 32658429  | rs9368737   | $4.6 \times 10^{-7}$  | 15325  | 0.524 | rs28772279  | lightheaded                  | $3.7 \times 10^{-7}$  | HLA-DQA2<br>HLA-DQB1--[]--   | TRUE  |
| 6p21.32 | 32673077  | rs9275485   | $3.8 \times 10^{-6}$  | 817    | 0.525 | rs1794269   | juvenile_t1d                 | $1.2 \times 10^{-59}$ | HLA-DQA2<br>HLA-DQB1--[]--   | FALSE |
| 6p21.32 | 32626249  | rs6928482   | $2.3 \times 10^{-7}$  | 51663  | 0.622 | rs9275563   | iqb.oral_corticosteroid_ever | $3.5 \times 10^{-7}$  | HLA-DQB1--[]--<br>HLA-DQA2   | TRUE  |
| 6p21.32 | 32626249  | rs6928482   | $2.3 \times 10^{-7}$  | 51663  | 0.622 | rs9275563   | iqb.pneumonia_frequency      | $1.4 \times 10^{-11}$ | HLA-DQA2                     | TRUE  |
| 6p21.32 | 32844103  | rs115591082 | $7.6 \times 10^{-6}$  | -41391 | 0.673 | rs143970236 | iqb.iodine_treatment_ever    | $5.4 \times 10^{-8}$  | [TAP2]                       | TRUE  |
| 6p21.31 | 33540209  | rs210134    | $2.5 \times 10^{-5}$  | 1298   | 0.706 | rs511515    | sunburns                     | $2.0 \times 10^{-25}$ | [BAK1]                       | TRUE  |
| 6p21.31 | 33647058  | rs10947428  | $4.9 \times 10^{-7}$  | 0      | 1.000 | rs10947428  | mold_allergy                 | $1.2 \times 10^{-7}$  | [ITPR3]                      | TRUE  |
| 6q22.31 | 120040712 | rs12211678  | $2.6 \times 10^{-6}$  | 3842   | 0.808 | rs12204589  | seasonal_allergies_broad     | $2.1 \times 10^{-8}$  | MAN1A1---[]                  | TRUE  |
| 6q22.31 | 120235543 | rs199534472 | $5.0 \times 10^{-5}$  | 2      | 1.000 | rs9489833   | penicillin_allergy           | $5.7 \times 10^{-7}$  | MAN1A1---[]                  | TRUE  |
| 6q26    | 164141649 | rs1475159   | $1.7 \times 10^{-5}$  | 23373  | 0.946 | rs4709752   | any_plant_allergy            | $7.6 \times 10^{-7}$  | QKI---[]                     | TRUE  |
| 6q27    | 167422812 | rs239931    | $7.9 \times 10^{-5}$  | 0      | 1.000 | rs239931    | any_animal_allergy           | $7.6 \times 10^{-7}$  | [FGFR1OP]<br>FGFR1OP-[]--    | TRUE  |
| 6q27    | 167422812 | rs239931    | $7.9 \times 10^{-5}$  | 32327  | 0.965 | rs162297    | juvenile_asthma              | $8.3 \times 10^{-7}$  | CCR6                         | TRUE  |
| 7p21.1  | 20390109  | rs17364847  | $2.2 \times 10^{-6}$  | 12149  | 0.593 | rs17455862  | height                       | $2.5 \times 10^{-13}$ | [ITGB8]                      | TRUE  |
| 7p21.1  | 20379191  | rs79580155  | $4.0 \times 10^{-5}$  | 63195  | 0.809 | rs739751    | other_animal_allergy         | $4.5 \times 10^{-7}$  | [ITGB8]<br>ITGB8--[]---      | TRUE  |
| 7p21.1  | 20502669  | rs10270615  | $2.1 \times 10^{-6}$  | 4057   | 0.688 | rs35120688  | any_animal_allergy           | $2.8 \times 10^{-8}$  | ABCB5                        | TRUE  |
| 7p15.1  | 28160029  | rs66537264  | $7.0 \times 10^{-5}$  | 84     | 0.507 | rs9648346   | any_animal_allergy           | $1.6 \times 10^{-8}$  | [JAZF1]<br>C7orf72---[]--    | TRUE  |
| 7p12.2  | 50309890  | rs62447171  | $5.0 \times 10^{-5}$  | -1198  | 0.703 | rs876037    | tonsillectomy                | $1.1 \times 10^{-11}$ | IKZF1<br>C7orf72---[]--      | TRUE  |
| 7p12.2  | 50325815  | rs2085423   | $1.7 \times 10^{-5}$  | 3584   | 0.858 | rs963594    | mosquito_combined            | $7.4 \times 10^{-11}$ | IKZF1                        | FALSE |
| 7q11.23 | 76980832  | rs17806725  | $3.2 \times 10^{-5}$  | 10317  | 0.929 | rs1181900   | any_plant_allergy            | $1.8 \times 10^{-7}$  | [GSAP]                       | TRUE  |
| 7q11.23 | 77035392  | rs6949654   | $7.0 \times 10^{-5}$  | 3553   | 0.509 | rs2190097   | any_animal_allergy           | $8.9 \times 10^{-7}$  | [GSAP]                       | TRUE  |
| 8p12    | 35117349  | rs10091394  | $3.4 \times 10^{-5}$  | -80915 | 0.526 | rs13253948  | insomnia                     | $5.3 \times 10^{-7}$  | []--UNC5D<br>TPD52---[]---   | TRUE  |
| 8q21.13 | 81292599  | rs7824394   | $1.2 \times 10^{-9}$  | -30055 | 0.672 | rs62517192  | any_immune                   | $9.7 \times 10^{-10}$ | ZBTB10<br>TPD52---[]---      | TRUE  |
| 8q21.13 | 81286298  | rs6986109   | $1.9 \times 10^{-9}$  | -23505 | 0.574 | rs67939787  | any_plant_allergy            | $3.7 \times 10^{-8}$  | ZBTB10<br>TPD52---[]---      | TRUE  |
| 8q21.13 | 81292599  | rs7824394   | $1.2 \times 10^{-9}$  | -29703 | 0.771 | rs7824993   | eggs_allergy                 | $8.7 \times 10^{-7}$  | ZBTB10<br>TPD52---[]---      | TRUE  |
| 8q21.13 | 81292599  | rs7824394   | $1.2 \times 10^{-9}$  | -27022 | 0.709 | rs2370613   | dust_mites_allergy           | $6.5 \times 10^{-11}$ | ZBTB10<br>TPD52---[]---      | TRUE  |
| 8q21.13 | 81292599  | rs7824394   | $1.2 \times 10^{-9}$  | -9424  | 0.750 | rs7837219   | hayfever_all                 | $1.2 \times 10^{-9}$  | ZBTB10<br>TPD52---[]---      | TRUE  |
| 8q21.13 | 81292599  | rs7824394   | $1.2 \times 10^{-9}$  | -7460  | 0.934 | rs10957978  | any_asthma                   | $1.1 \times 10^{-11}$ | ZBTB10<br>TPD52---[]---      | TRUE  |
| 8q21.13 | 81292599  | rs7824394   | $1.2 \times 10^{-9}$  | -6301  | 0.731 | rs6986109   | mold_allergy                 | $1.2 \times 10^{-9}$  | ZBTB10<br>TPD52---[]---      | TRUE  |
| 8q21.13 | 81292599  | rs7824394   | $1.2 \times 10^{-9}$  | -6301  | 0.731 | rs6986109   | seasonal_allergies_broad     | $4.3 \times 10^{-9}$  | ZBTB10<br>TPD52---[]---      | TRUE  |
| 8q21.13 | 81292599  | rs7824394   | $1.2 \times 10^{-9}$  | 0      | 1.000 | rs7824394   | any_animal_allergy           | $8.1 \times 10^{-11}$ | ZBTB10                       | TRUE  |

|          |           |                   |                       |        |       |                   |                                    |                       |                                                     |       |
|----------|-----------|-------------------|-----------------------|--------|-------|-------------------|------------------------------------|-----------------------|-----------------------------------------------------|-------|
| 8q21.13  | 81292599  | rs7824394         | $1.2 \times 10^{-9}$  | 0      | 1.000 | rs7824394         | eczema                             | $3.3 \times 10^{-11}$ | TPD52---[ ]---<br>ZBTB10<br>TPD52---[ ]--<br>ZBTB10 | TRUE  |
| 8q21.13  | 81292599  | rs7824394         | $1.2 \times 10^{-9}$  | 11977  | 0.674 | rs4739739         | iqb.took_meds_asthma_or_lung       | $1.3 \times 10^{-7}$  | [JAK2]                                              | TRUE  |
| 9p24.1   | 4980929   | rs141192940       | $5.3 \times 10^{-5}$  | 3601   | 0.672 | rs1887428         | crohns_or_ulcerative_colitis       | $8.7 \times 10^{-9}$  | RCL1---[ ]JAK2                                      | TRUE  |
| 9p24.1   | 4980929   | rs141192940       | $5.3 \times 10^{-5}$  | 17472  | 0.588 | rs7868130         | blood_disorder                     | $5.8 \times 10^{-14}$ | [JAK2]                                              | TRUE  |
| 9p24.1   | 4980929   | rs141192940       | $5.3 \times 10^{-5}$  | 17472  | 0.588 | rs7868130         | mpn_narrow                         | $5.7 \times 10^{-59}$ | [JAK2]                                              | TRUE  |
| 9p24.1   | 4980929   | rs141192940       | $5.3 \times 10^{-5}$  | 17472  | 0.588 | rs7868130         | mpn_or_v617f                       | $4.7 \times 10^{-92}$ | [JAK2]                                              | TRUE  |
| 9p24.1   | 4980929   | rs141192940       | $5.3 \times 10^{-5}$  | 29162  | 0.582 | rs10974910        | jak2_v617f_cc                      | $2.0 \times 10^{-36}$ | [JAK2]                                              | TRUE  |
| 9p24.1   | 5130965   | rs10974978        | $2.1 \times 10^{-5}$  | -51137 | 0.791 | rs10974952        | iqb.took_meds_asthma_or_lung       | $3.4 \times 10^{-7}$  | [JAK2]                                              | TRUE  |
| 9p24.1   | 5130965   | rs10974978        | $2.1 \times 10^{-5}$  | -16442 | 0.847 | rs3780381         | seasonal_allergies_broad           | $4.1 \times 10^{-7}$  | [JAK2]                                              | TRUE  |
| 9p24.1   | 5130965   | rs10974978        | $2.1 \times 10^{-5}$  | 53257  | 0.759 | rs12349508        | heartburn                          | $5.4 \times 10^{-7}$  | [INSL6]                                             | TRUE  |
| 9p24.1   | 6021398   | rs148813004       | $8.6 \times 10^{-6}$  | 0      | 1.000 | rs148813004       | any_food_allergy                   | $5.4 \times 10^{-7}$  | RANBP6---[ ]--IL33<br>RANBP6---[ ]--<br>IL33        | TRUE  |
| 9p24.1   | 6208030   | rs144829310       | $3.3 \times 10^{-10}$ | -31159 | 0.949 | rs72699188        | juvenile_asthma                    | $1.1 \times 10^{-7}$  | RANBP6---[ ]--<br>IL33<br>RANBP6---[ ]--<br>IL33    | TRUE  |
| 9p24.1   | 6208030   | rs144829310       | $3.3 \times 10^{-10}$ | -30577 | 0.969 | rs9775039         | any_animal_allergy                 | $8.1 \times 10^{-15}$ | RANBP6---[ ]--<br>IL33<br>RANBP6---[ ]--<br>IL33    | TRUE  |
| 9p24.1   | 6208030   | rs144829310       | $3.3 \times 10^{-10}$ | -30577 | 0.969 | rs9775039         | any_plant_allergy                  | $1.0 \times 10^{-13}$ | RANBP6---[ ]--<br>IL33<br>RANBP6---[ ]--<br>IL33    | TRUE  |
| 9p24.1   | 6208030   | rs144829310       | $3.3 \times 10^{-10}$ | -30577 | 0.969 | rs9775039         | dust_mites_allergy                 | $1.3 \times 10^{-8}$  | RANBP6---[ ]--<br>IL33<br>RANBP6---[ ]--<br>IL33    | TRUE  |
| 9p24.1   | 6208030   | rs144829310       | $3.3 \times 10^{-10}$ | -30577 | 0.969 | rs9775039         | iqb.took_meds_asthma_or_lung       | $2.3 \times 10^{-20}$ | RANBP6---[ ]--<br>IL33<br>RANBP6---[ ]--<br>IL33    | TRUE  |
| 9p24.1   | 6208030   | rs144829310       | $3.3 \times 10^{-10}$ | -30577 | 0.969 | rs9775039         | mold_allergy                       | $1.0 \times 10^{-12}$ | RANBP6---[ ]--<br>IL33<br>RANBP6---[ ]--<br>IL33    | TRUE  |
| 9p24.1   | 6208030   | rs144829310       | $3.3 \times 10^{-10}$ | -30577 | 0.969 | rs9775039         | seasonal_allergies_broad           | $5.2 \times 10^{-14}$ | RANBP6---[ ]--<br>IL33<br>RANBP6---[ ]--<br>IL33    | TRUE  |
| 9p24.1   | 6208030   | rs144829310       | $3.3 \times 10^{-10}$ | -26505 | 0.614 | rs4529511         | iqb.chronic_sinus_infections       | $1.6 \times 10^{-7}$  | RANBP6---[ ]--<br>IL33<br>RANBP6---[ ]--<br>IL33    | TRUE  |
| 9p24.1   | 6208030   | rs144829310       | $3.3 \times 10^{-10}$ | -17954 | 0.959 | rs1342326         | allergic_asthma                    | $5.3 \times 10^{-15}$ | RANBP6---[ ]--<br>IL33<br>RANBP6---[ ]--<br>IL33    | TRUE  |
| 9p24.1   | 6208030   | rs144829310       | $3.3 \times 10^{-10}$ | -17954 | 0.959 | rs1342326         | juvenile_allergic_asthma           | $1.2 \times 10^{-13}$ | RANBP6---[ ]--<br>IL33<br>RANBP6---[ ]--<br>IL33    | TRUE  |
| 9p24.1   | 6208030   | rs144829310       | $3.3 \times 10^{-10}$ | 0      | 1.000 | rs144829310       | any_asthma                         | $1.3 \times 10^{-31}$ | RANBP6---[ ]--IL33<br>RANBP6---[ ]--IL33            | TRUE  |
| 9p24.1   | 6213829   | rs10975488        | $7.7 \times 10^{-11}$ | 0      | 1.000 | rs10975488        | hayfever_all                       | $1.6 \times 10^{-14}$ | IL33--[ ]--<br>TPD52L3<br>IL33--[ ]--<br>TPD52L3    | TRUE  |
| 9p24.1   | 6187132   | rs76962799        | $4.9 \times 10^{-8}$  | 95379  | 0.653 | rs78757963        | any_drug_allergy                   | $1.1 \times 10^{-7}$  | TPD52L3<br>IL33--[ ]--<br>TPD52L3                   | TRUE  |
| 9p24.1   | 6297108   | rs143305466       | $1.0 \times 10^{-6}$  | -4506  | 0.748 | rs744567          | iqb.travel_preferences             | $8.8 \times 10^{-7}$  | [COL15A1]                                           | TRUE  |
| 9q22.33  | 101799399 | rs3780620         | $1.5 \times 10^{-5}$  | 20445  | 0.584 | rs7038068         | iqb.took_meds_asthma_or_lung       | $1.8 \times 10^{-8}$  | TRAF1--[ ]--C5                                      | FALSE |
| 9q33.2   | 123650534 | rs10760123        | $2.2 \times 10^{-5}$  | 42406  | 0.532 | rs10760127        | back_hair                          | $5.0 \times 10^{-8}$  | [ABO]                                               | TRUE  |
| 9q34.2   | 136139907 | rs8176680         | $3.0 \times 10^{-7}$  | -6999  | 0.558 | rs8176719         | iqb.lipoma                         | $2.1 \times 10^{-8}$  | [ABO]                                               | TRUE  |
| 9q34.2   | 136138765 | 9:136138765:GCGCC | $2.3 \times 10^{-6}$  | 0      | 1.000 | 9:136138765:GCGCC | gallstones_or_gall_bladder_removal | $5.9 \times 10^{-8}$  | [ABO]                                               | TRUE  |
| 9q34.2   | 136141870 | rs2519093         | $3.6 \times 10^{-8}$  | -1963  | 0.568 | rs8176680         | healthy_old                        | $9.6 \times 10^{-7}$  | [ABO]                                               | TRUE  |
| 9q34.2   | 136141870 | rs2519093         | $3.6 \times 10^{-8}$  | -1963  | 0.568 | rs8176680         | iqb.low_hdl                        | $6.3 \times 10^{-7}$  | [ABO]                                               | TRUE  |
| 9q34.2   | 136141870 | rs2519093         | $3.6 \times 10^{-8}$  | 0      | 1.000 | rs2519093         | any_animal_allergy                 | $1.5 \times 10^{-11}$ | [ABO]                                               | TRUE  |
| 9q34.2   | 136141870 | rs2519093         | $3.6 \times 10^{-8}$  | 0      | 1.000 | rs2519093         | dust_mites_allergy                 | $2.9 \times 10^{-9}$  | [ABO]                                               | TRUE  |
| 9q34.2   | 136141870 | rs2519093         | $3.6 \times 10^{-8}$  | 0      | 1.000 | rs2519093         | mold_allergy                       | $1.7 \times 10^{-8}$  | [ABO]                                               | TRUE  |
| 9q34.2   | 136141870 | rs2519093         | $3.6 \times 10^{-8}$  | 0      | 1.000 | rs2519093         | high_cholesterol_broad             | $1.9 \times 10^{-36}$ | [ABO]                                               | TRUE  |
| 9q34.2   | 136137106 | rs687289          | $2.0 \times 10^{-6}$  | 7202   | 0.753 | rs576123          | any_plant_allergy                  | $8.2 \times 10^{-11}$ | [ABO]                                               | TRUE  |
| 9q34.2   | 136137106 | rs687289          | $2.0 \times 10^{-6}$  | 7202   | 0.753 | rs576123          | seasonal_allergies_broad           | $7.0 \times 10^{-11}$ | [ABO]                                               | TRUE  |
| 9q34.2   | 136139907 | rs8176680         | $3.0 \times 10^{-7}$  | 6170   | 0.607 | rs676996          | iqb.need_braces                    | $1.9 \times 10^{-7}$  | [ABO]                                               | TRUE  |
| 9q34.2   | 136146448 | 9:136146448:TAAGA | $2.6 \times 10^{-5}$  | 0      | 1.000 | 9:136146448:TAAGA | hemorrhoids                        | $4.2 \times 10^{-7}$  | [ABO]                                               | FALSE |
| 9q34.2   | 136141870 | rs2519093         | $3.6 \times 10^{-8}$  | 4727   | 0.575 | rs550057          | iqb.blood_donation_frequency       | $4.0 \times 10^{-12}$ | [ABO]                                               | FALSE |
| 9q34.2   | 136149095 | 9:136149095:CA_C  | $7.1 \times 10^{-6}$  | 0      | 1.000 | 9:136149095:CA_C  | iqb.childhood_ear_infections       | $3.7 \times 10^{-11}$ | [ABO]                                               | TRUE  |
| 9q34.2   | 136141870 | rs2519093         | $3.6 \times 10^{-8}$  | 7529   | 0.991 | rs507666          | iqb.took_meds_blood_thinners       | $5.9 \times 10^{-25}$ | [ABO]                                               | TRUE  |
| 9q34.2   | 136141870 | rs2519093         | $3.6 \times 10^{-8}$  | 7529   | 0.991 | rs507666          | iqb.varicose_veins_legs            | $9.4 \times 10^{-25}$ | [ABO]                                               | TRUE  |
| 9q34.2   | 136139907 | rs8176680         | $3.0 \times 10^{-7}$  | 9593   | 0.656 | rs529565          | blood_clots                        | $7.1 \times 10^{-63}$ | [ABO]                                               | TRUE  |
| 9q34.2   | 136149709 | 9:136149709:AC_A  | $6.6 \times 10^{-7}$  | 0      | 1.000 | 9:136149709:AC_A  | heart_metabolic_disease            | $1.2 \times 10^{-8}$  | [ABO]                                               | TRUE  |
| 9q34.2   | 136149709 | 9:136149709:AC_A  | $6.6 \times 10^{-7}$  | 0      | 1.000 | 9:136149709:AC_A  | heart_metabolic_disease_burden     | $2.8 \times 10^{-7}$  | [ABO]                                               | TRUE  |
| 9q34.2   | 136141870 | rs2519093         | $3.6 \times 10^{-8}$  | 13130  | 0.983 | rs635634          | iqb.warfarin_ever                  | $5.4 \times 10^{-19}$ | ABO--[ ]--SURF6                                     | TRUE  |
| 9q34.2   | 136141870 | rs2519093         | $3.6 \times 10^{-8}$  | 13130  | 0.983 | rs635634          | tonsillectomy                      | $8.5 \times 10^{-9}$  | ABO--[ ]--SURF6                                     | TRUE  |
| 10p15.1  | 6066195   | rs12358961        | $3.0 \times 10^{-5}$  | 1493   | 0.983 | rs2025345         | seasonal_allergies_broad           | $9.3 \times 10^{-7}$  | [IL2RA]                                             | TRUE  |
| 10p15.1  | 6074451   | rs4747846         | $7.4 \times 10^{-6}$  | 0      | 1.000 | rs4747846         | dust_mites_allergy                 | $7.5 \times 10^{-7}$  | [IL2RA]                                             | TRUE  |
| 10p14    | 9027062   | rs61228150        | $1.1 \times 10^{-5}$  | 0      | 1.000 | rs61228150        | dust_mites_allergy                 | $3.0 \times 10^{-10}$ | GATA3---[ ]                                         | TRUE  |
| 10p14    | 9043404   | rs61840192        | $6.9 \times 10^{-11}$ | 0      | 1.000 | rs61840192        | iqb.took_meds_asthma_or_lung       | $1.2 \times 10^{-9}$  | GATA3---[ ]                                         | TRUE  |
| 10p14    | 9043404   | rs61840192        | $6.9 \times 10^{-11}$ | 0      | 1.000 | rs61840192        | seasonal_allergies_broad           | $7.1 \times 10^{-13}$ | GATA3---[ ]                                         | TRUE  |
| 10p14    | 9043404   | rs61840192        | $6.9 \times 10^{-11}$ | 0      | 1.000 | rs61840192        | scarlet_fever                      | $5.8 \times 10^{-7}$  | GATA3---[ ]                                         | TRUE  |
| 10p14    | 9049253   | rs12413578        | $1.1 \times 10^{-6}$  | 0      | 1.000 | rs12413578        | any_asthma                         | $8.1 \times 10^{-12}$ | GATA3---[ ]                                         | TRUE  |
| 10p14    | 9043404   | rs61840192        | $6.9 \times 10^{-11}$ | 9728   | 0.898 | rs962993          | any_plant_allergy                  | $6.8 \times 10^{-13}$ | GATA3---[ ]                                         | TRUE  |
| 10p14    | 9052742   | rs1775550         | $5.6 \times 10^{-11}$ | 9056   | 0.983 | rs6602349         | any_animal_allergy                 | $8.4 \times 10^{-16}$ | GATA3---[ ]                                         | TRUE  |
| 10p14    | 9043404   | rs61840192        | $6.9 \times 10^{-11}$ | 19452  | 0.882 | rs2197415         | any_food_allergy                   | $6.5 \times 10^{-8}$  | GATA3---[ ]                                         | TRUE  |
| 10p14    | 9052742   | rs1775550         | $5.6 \times 10^{-11}$ | 32561  | 0.518 | rs2797272         | iqb.snore                          | $2.1 \times 10^{-8}$  | GATA3---[ ]                                         | TRUE  |
| 10q24.32 | 104319131 | rs201041406       | $2.6 \times 10^{-10}$ | -90832 | 0.518 | rs11593589        | mold_allergy                       | $4.7 \times 10^{-10}$ | [TMEM180]                                           | TRUE  |
| 10q24.32 | 104319131 | rs201041406       | $2.6 \times 10^{-10}$ | -90832 | 0.518 | rs11593589        | seasonal_allergies_broad           | $5.8 \times 10^{-13}$ | [TMEM180]<br>TMEM180[ ]--<br>ACTR1A                 | TRUE  |
| 10q24.32 | 104319131 | rs201041406       | $2.6 \times 10^{-10}$ | -82124 | 0.564 | rs12569526        | height                             | $2.7 \times 10^{-24}$ | [ACTR1A]                                            | TRUE  |
| 10q24.32 | 104228299 | rs11593589        | $3.6 \times 10^{-10}$ | 29796  | 0.619 | rs715440          | any_animal_allergy                 | $7.6 \times 10^{-10}$ | [ACTR1A]                                            | TRUE  |
| 10q24.32 | 104228299 | rs11593589        | $3.6 \times 10^{-10}$ | 29796  | 0.619 | rs715440          | any_food_allergy                   | $3.0 \times 10^{-8}$  | [ACTR1A]                                            | TRUE  |
| 10q24.32 | 104278261 | rs201333164       | $1.1 \times 10^{-10}$ | 0      | 1.000 | rs201333164       | insect_allergy                     | $3.4 \times 10^{-8}$  | [SUFU]                                              | TRUE  |
| 10q24.32 | 104319131 | rs201041406       | $2.6 \times 10^{-10}$ | 21573  | 0.595 | rs9783158         | any_plant_allergy                  | $8.9 \times 10^{-14}$ | [SUFU]                                              | TRUE  |
| 10q24.32 | 104319131 | rs201041406       | $2.6 \times 10^{-10}$ | 21573  | 0.595 | rs9783158         | dust_mites_allergy                 | $6.3 \times 10^{-9}$  | [SUFU]                                              | TRUE  |
| 10q24.32 | 104319131 | rs201041406       | $2.6 \times 10^{-10}$ | 55521  | 0.631 | rs200553041       | other_animal_allergy               | $4.1 \times 10^{-7}$  | [SUFU]                                              | TRUE  |
| 10q24.32 | 104707211 | rs34957371        | $5.8 \times 10^{-7}$  | -48193 | 0.544 | rs7909591         | ever_tobacco_user                  | $2.3 \times 10^{-8}$  | [AS3MT]<br>PPP1R32--[ ]--<br>LRRC10B                | FALSE |
| 11q12.2  | 61263710  | rs12806665        | $9.7 \times 10^{-5}$  | -2485  | 0.921 | rs11230714        | blood_pressure_meds                | $1.2 \times 10^{-7}$  | PPP1R32--[ ]--<br>LRRC10B                           | FALSE |
| 11q12.2  | 61263710  | rs12806665        | $9.7 \times 10^{-5}$  | 11468  | 0.921 | rs11230727        | high_blood_pressure                | $7.2 \times 10^{-8}$  | LRRC10B                                             | FALSE |
| 11q13.5  | 76299431  | rs55646091        | $2.1 \times 10^{-9}$  | -50801 | 0.906 | rs61894547        | mosquito_combined                  | $5.5 \times 10^{-7}$  | [C11orf30]<br>C11orf30--[ ]--<br>LRRC32             | FALSE |
| 11q13.5  | 76299844  | rs34455012        | $1.2 \times 10^{-13}$ | -23389 | 0.516 | rs10899231        | other_animal_allergy               | $4.3 \times 10^{-8}$  | C11orf30--[ ]--<br>LRRC32                           | TRUE  |
| 11q13.5  | 76293758  | rs7936323         | $1.1 \times 10^{-14}$ | -688   | 0.845 | rs7114362         | other_food_allergy                 | $9.9 \times 10^{-7}$  | C11orf30--[ ]--                                     | TRUE  |

|          |           |                    |                       |        |       |                    |                               |                       |                                    |       |
|----------|-----------|--------------------|-----------------------|--------|-------|--------------------|-------------------------------|-----------------------|------------------------------------|-------|
| 11q13.5  | 76293758  | rs7936323          | 1.1×10 <sup>-14</sup> | -32    | 0.974 | rs7936312          | allergic_asthma               | 3.2×10 <sup>-7</sup>  | LRRC32                             | TRUE  |
| 11q13.5  | 76293758  | rs7936323          | 1.1×10 <sup>-14</sup> | -32    | 0.974 | rs7936312          | any_immune                    | 7.1×10 <sup>-13</sup> | C11orf30--[]--<br>LRRC32           | TRUE  |
| 11q13.5  | 76293758  | rs7936323          | 1.1×10 <sup>-14</sup> | 0      | 1.000 | rs7936323          | any_animal_allergy            | 1.7×10 <sup>-18</sup> | C11orf30--[]--<br>LRRC32           | TRUE  |
| 11q13.5  | 76293758  | rs7936323          | 1.1×10 <sup>-14</sup> | 0      | 1.000 | rs7936323          | any_asthma                    | 1.4×10 <sup>-16</sup> | C11orf30--[]--<br>LRRC32           | TRUE  |
| 11q13.5  | 76293758  | rs7936323          | 1.1×10 <sup>-14</sup> | 0      | 1.000 | rs7936323          | any_plant_allergy             | 4.8×10 <sup>-15</sup> | C11orf30--[]--<br>LRRC32           | TRUE  |
| 11q13.5  | 76293758  | rs7936323          | 1.1×10 <sup>-14</sup> | 0      | 1.000 | rs7936323          | dust_mites_allergy            | 1.9×10 <sup>-18</sup> | C11orf30--[]--<br>LRRC32           | TRUE  |
| 11q13.5  | 76293758  | rs7936323          | 1.1×10 <sup>-14</sup> | 0      | 1.000 | rs7936323          | eczema                        | 5.8×10 <sup>-16</sup> | C11orf30--[]--<br>LRRC32           | TRUE  |
| 11q13.5  | 76293758  | rs7936323          | 1.1×10 <sup>-14</sup> | 0      | 1.000 | rs7936323          | hayfever_all                  | 5.6×10 <sup>-11</sup> | C11orf30--[]--<br>LRRC32           | TRUE  |
| 11q13.5  | 76293758  | rs7936323          | 1.1×10 <sup>-14</sup> | 0      | 1.000 | rs7936323          | insect_allergy                | 2.2×10 <sup>-7</sup>  | C11orf30--[]--<br>LRRC32           | TRUE  |
| 11q13.5  | 76293758  | rs7936323          | 1.1×10 <sup>-14</sup> | 0      | 1.000 | rs7936323          | iqb.took_meds_asthma_or_lung  | 4.0×10 <sup>-20</sup> | C11orf30--[]--<br>LRRC32           | TRUE  |
| 11q13.5  | 76293758  | rs7936323          | 1.1×10 <sup>-14</sup> | 0      | 1.000 | rs7936323          | juvenile_allergic_asthma      | 2.3×10 <sup>-9</sup>  | C11orf30--[]--<br>LRRC32           | TRUE  |
| 11q13.5  | 76293758  | rs7936323          | 1.1×10 <sup>-14</sup> | 0      | 1.000 | rs7936323          | juvenile_asthma               | 6.9×10 <sup>-9</sup>  | C11orf30--[]--<br>LRRC32           | TRUE  |
| 11q13.5  | 76293758  | rs7936323          | 1.1×10 <sup>-14</sup> | 0      | 1.000 | rs7936323          | mold_allergy                  | 6.0×10 <sup>-13</sup> | C11orf30--[]--<br>LRRC32           | TRUE  |
| 11q13.5  | 76293758  | rs7936323          | 1.1×10 <sup>-14</sup> | 0      | 1.000 | rs7936323          | seasonal_allergies_broad      | 3.0×10 <sup>-16</sup> | C11orf30--[]--<br>LRRC32           | TRUE  |
| 11q13.5  | 76293758  | rs7936323          | 1.1×10 <sup>-14</sup> | 5436   | 0.898 | rs2155219          | any_food_allergy              | 9.2×10 <sup>-12</sup> | C11orf30--[]--<br>LRRC32           | TRUE  |
| 11q13.5  | 76293758  | rs7936323          | 1.1×10 <sup>-14</sup> | 5436   | 0.898 | rs2155219          | tree_nuts_allergy             | 1.0×10 <sup>-8</sup>  | C11orf30--[]--<br>LRRC32           | TRUE  |
| 11q13.5  | 76293758  | rs7936323          | 1.1×10 <sup>-14</sup> | 8315   | 0.879 | rs7930763          | food_allergy                  | 3.9×10 <sup>-9</sup>  | C11orf30--[]--<br>LRRC32           | TRUE  |
| 11q23.1  | 111455916 | rs200687381        | 9.6×10 <sup>-7</sup>  | -33699 | 0.631 | rs663763           | high_blood_pressure           | 2.3×10 <sup>-7</sup>  | [LAYN]                             |       |
| 11q23.1  | 111455916 | rs200687381        | 9.6×10 <sup>-7</sup>  | 0      | 1.000 | rs200687381        | any_plant_allergy             | 3.4×10 <sup>-10</sup> | LAYN--[]--SIK2                     | TRUE  |
| 11q23.1  | 111455916 | rs200687381        | 9.6×10 <sup>-7</sup>  | 0      | 1.000 | rs200687381        | dust_mites_allergy            | 1.3×10 <sup>-7</sup>  | LAYN--[]--SIK2                     | TRUE  |
| 11q23.1  | 111455916 | rs200687381        | 9.6×10 <sup>-7</sup>  | 4762   | 0.732 | rs567040           | seasonal_allergies_broad      | 8.4×10 <sup>-9</sup>  | LAYN--[]--SIK2                     |       |
| 11q23.1  | 111455916 | rs200687381        | 9.6×10 <sup>-7</sup>  | 25399  | 0.785 | rs10532521         | iqb.gap_between_teeth         | 3.9×10 <sup>-9</sup>  | [SIK2]                             |       |
| 11q23.1  | 111455916 | rs200687381        | 9.6×10 <sup>-7</sup>  | 35406  | 0.812 | rs11828343         | any_animal_allergy            | 7.1×10 <sup>-10</sup> | [SIK2]                             |       |
| 11q23.3  | 116872034 | rs10892057         | 3.4×10 <sup>-6</sup>  | 0      | 1.000 | rs10892057         | any_plant_allergy             | 3.1×10 <sup>-7</sup>  | [SIK3]                             | TRUE  |
| 11q23.3  | 116872034 | rs10892057         | 3.4×10 <sup>-6</sup>  | 0      | 1.000 | rs10892057         | seasonal_allergies_broad      | 5.8×10 <sup>-7</sup>  | [SIK3]                             | TRUE  |
| 11q23.3  | 117083373 | rs111765459        | 7.3×10 <sup>-6</sup>  | 13279  | 0.922 | rs2277287          | any_animal_allergy            | 4.0×10 <sup>-7</sup>  | [PCSK7]                            | TRUE  |
| 11q23.3  | 118575261 | rs1118575261:A_ATT | 9.9×10 <sup>-11</sup> | 0      | 1.000 | rs1118575261:A_ATT | any_plant_allergy             | 9.9×10 <sup>-11</sup> | TREH--[]--DDX6                     | TRUE  |
| 11q23.3  | 118590078 | rs470203           | 1.7×10 <sup>-10</sup> | 0      | 1.000 | rs470203           | any_animal_allergy            | 3.8×10 <sup>-9</sup>  | TREH--[]--DDX6                     | TRUE  |
| 11q23.3  | 118590078 | rs470203           | 1.7×10 <sup>-10</sup> | 0      | 1.000 | rs470203           | dust_mites_allergy            | 9.7×10 <sup>-11</sup> | TREH--[]--DDX6                     | TRUE  |
| 11q23.3  | 118675772 | rs11217036         | 9.3×10 <sup>-11</sup> | -68461 | 0.843 | rs56267528         | iqb.took_meds_asthma_or_lung  | 7.6×10 <sup>-8</sup>  | TREH--[]--DDX6                     | TRUE  |
| 11q23.3  | 118721699 | rs7125066          | 1.1×10 <sup>-8</sup>  | 0      | 1.000 | rs7125066          | mold_allergy                  | 5.2×10 <sup>-8</sup>  | DDX6--[]--CXCR5                    | TRUE  |
| 11q23.3  | 118675772 | rs11217036         | 9.3×10 <sup>-11</sup> | 62509  | 0.523 | rs7119038          | any_asthma                    | 9.3×10 <sup>-8</sup>  | DDX6--[]--CXCR5                    | TRUE  |
| 11q23.3  | 118675772 | rs11217036         | 9.3×10 <sup>-11</sup> | 62509  | 0.523 | rs7119038          | any_immune                    | 7.7×10 <sup>-7</sup>  | DDX6--[]--CXCR5                    | TRUE  |
| 11q23.3  | 118675772 | rs11217036         | 9.3×10 <sup>-11</sup> | 66952  | 0.569 | rs7125333          | seasonal_allergies_broad      | 4.3×10 <sup>-11</sup> | DDX6--[]--CXCR5                    | TRUE  |
| 11q23.3  | 118675772 | rs11217036         | 9.3×10 <sup>-11</sup> | 68624  | 0.678 | rs7117313          | hayfever_all                  | 1.6×10 <sup>-7</sup>  | DDX6--[]--CXCR5<br>SPATA19--[]--   | TRUE  |
| 11q25    | 133754975 | rs329664           | 2.5×10 <sup>-7</sup>  | 0      | 1.000 | rs329664           | any_neurological              | 9.0×10 <sup>-9</sup>  | IGSF9B                             | TRUE  |
| 12q13.12 | 50345671  | rs11169225         | 5.4×10 <sup>-8</sup>  | -2505  | 0.827 | rs3759124          | iqb.sweat_during_workout      | 2.9×10 <sup>-9</sup>  | FAM2--[]--AQP2                     | FALSE |
| 12q13.12 | 50345671  | rs11169225         | 5.4×10 <sup>-8</sup>  | 0      | 1.000 | rs11169225         | any_animal_allergy            | 7.1×10 <sup>-9</sup>  | [AQP2]                             | TRUE  |
| 12q13.12 | 50345671  | rs11169225         | 5.4×10 <sup>-8</sup>  | 0      | 1.000 | rs11169225         | seasonal_allergies_broad      | 4.6×10 <sup>-8</sup>  | [AQP2]                             | TRUE  |
| 12q13.12 | 50563890  | rs56709084         | 7.8×10 <sup>-5</sup>  | 31555  | 0.540 | rs10219559         | any_cvd                       | 1.3×10 <sup>-7</sup>  | [LIMA1]                            | TRUE  |
| 12q13.2  | 56427808  | rs1702877          | 8.0×10 <sup>-5</sup>  | -24231 | 0.965 | rs772921           | any_autoimmune                | 7.7×10 <sup>-7</sup>  | SUOX--[]--IKZF4                    | TRUE  |
| 12q13.2  | 56427808  | rs1702877          | 8.0×10 <sup>-5</sup>  | 0      | 1.000 | rs1702877          | any_immune                    | 2.7×10 <sup>-7</sup>  | [IKZF4]                            | TRUE  |
| 12q13.2  | 56427808  | rs1702877          | 8.0×10 <sup>-5</sup>  | 27486  | 0.947 | rs2640564          | vitiligo                      | 3.8×10 <sup>-10</sup> | RPS26--[]--ERBB3                   | TRUE  |
| 12q13.2  | 56427808  | rs1702877          | 8.0×10 <sup>-5</sup>  | 39779  | 0.554 | rs7312770          | hypothyroidism                | 8.0×10 <sup>-8</sup>  | RPS26--[]--ERBB3                   | TRUE  |
| 12q13.2  | 56427808  | rs1702877          | 8.0×10 <sup>-5</sup>  | 39779  | 0.554 | rs7312770          | pcos                          | 8.9×10 <sup>-7</sup>  | RPS26--[]--ERBB3                   | TRUE  |
| 12q13.3  | 57493727  | rs3024971          | 5.2×10 <sup>-7</sup>  | 0      | 1.000 | rs3024971          | any_animal_allergy            | 4.5×10 <sup>-11</sup> | [STAT6]                            | TRUE  |
| 12q13.3  | 57493727  | rs3024971          | 5.2×10 <sup>-7</sup>  | 0      | 1.000 | rs3024971          | mosquito_combined             | 9.4×10 <sup>-16</sup> | [STAT6]                            | FALSE |
| 12q13.3  | 57493727  | rs3024971          | 5.2×10 <sup>-7</sup>  | 0      | 1.000 | rs3024971          | mosquito_severe               | 5.3×10 <sup>-10</sup> | [STAT6]                            | TRUE  |
| 12q13.3  | 57510309  | rs324014           | 4.3×10 <sup>-5</sup>  | -6534  | 0.682 | rs167769           | juvenile_allergic_asthma      | 5.7×10 <sup>-7</sup>  | [STAT6]                            | TRUE  |
| 12q13.3  | 57510309  | rs324014           | 4.3×10 <sup>-5</sup>  | -1254  | 0.984 | rs3001426          | any_asthma                    | 1.4×10 <sup>-10</sup> | STAT6--[]--LRP1                    | TRUE  |
| 12q13.3  | 57510309  | rs324014           | 4.3×10 <sup>-5</sup>  | 16974  | 0.599 | rs11172113         | iqb.red_wine_headache         | 1.5×10 <sup>-12</sup> | [LRP1]                             | FALSE |
| 12q13.3  | 57510309  | rs324014           | 4.3×10 <sup>-5</sup>  | 16974  | 0.599 | rs11172113         | migraine_diagnosis            | 5.6×10 <sup>-36</sup> | [LRP1]                             | FALSE |
| 12q21.33 | 90301665  | rs4240744          | 7.5×10 <sup>-7</sup>  | 0      | 1.000 | rs4240744          | seasonal_allergies_broad      | 4.5×10 <sup>-7</sup>  | ATP2B1---[]                        | TRUE  |
| 12q21.33 | 90301665  | rs4240744          | 7.5×10 <sup>-7</sup>  | 2010   | 0.989 | rs7972542          | any_plant_allergy             | 2.5×10 <sup>-7</sup>  | ATP2B1---[]                        | TRUE  |
| 12q21.33 | 90303567  | rs7957657          | 2.4×10 <sup>-6</sup>  | 41128  | 0.694 | rs7294671          | other_plant_allergy           | 1.6×10 <sup>-7</sup>  | ATP2B1---[]                        | TRUE  |
| 12q21.33 | 92573643  | rs790468           | 8.8×10 <sup>-5</sup>  | -69259 | 0.884 | rs1658685          | eyecolor_herc2_blue           | 3.3×10 <sup>-10</sup> | [LOC256021]<br>BTG1--[]--          | TRUE  |
| 12q21.33 | 92573643  | rs790468           | 8.8×10 <sup>-5</sup>  | -5810  | 0.979 | rs790464           | eyecolor_simple               | 3.2×10 <sup>-7</sup>  | CLU10S<br>RIC8B--[]--              | TRUE  |
| 12q23.3  | 107350088 | rs2041895          | 8.6×10 <sup>-6</sup>  | -27173 | 0.532 | rs10861679         | height                        | 1.5×10 <sup>-11</sup> | C12orf23<br>FAM109A--[]--<br>SH2B3 | TRUE  |
| 12q24.12 | 111910219 | rs10774625         | 4.1×10 <sup>-5</sup>  | -76431 | 0.835 | rs10774624         | iqb.took_meds_blood_thinners  | 2.6×10 <sup>-7</sup>  | FAM109A--[]--<br>SH2B3             | FALSE |
| 12q24.12 | 111910219 | rs10774625         | 4.1×10 <sup>-5</sup>  | -76431 | 0.835 | rs10774624         | any_cvd                       | 9.0×10 <sup>-11</sup> | SH2B3                              | FALSE |
| 12q24.12 | 111910219 | rs10774625         | 4.1×10 <sup>-5</sup>  | -45170 | 0.886 | rs7310615          | high_blood_pressure           | 1.8×10 <sup>-13</sup> | [SH2B3]                            | FALSE |
| 12q24.12 | 111910219 | rs10774625         | 4.1×10 <sup>-5</sup>  | -25611 | 0.934 | rs3184504          | iqb.ever_diagnosed_autoimmune | 1.3×10 <sup>-15</sup> | [SH2B3]                            | FALSE |
| 12q24.12 | 111910219 | rs10774625         | 4.1×10 <sup>-5</sup>  | -25611 | 0.934 | rs3184504          | jak2_v617f_cc                 | 3.6×10 <sup>-8</sup>  | [SH2B3]                            | FALSE |
| 12q24.12 | 111910219 | rs10774625         | 4.1×10 <sup>-5</sup>  | -25611 | 0.934 | rs3184504          | mpn_narrow                    | 3.3×10 <sup>-7</sup>  | [SH2B3]                            | FALSE |
| 12q24.12 | 111910219 | rs10774625         | 4.1×10 <sup>-5</sup>  | -25611 | 0.934 | rs3184504          | mpn_or_v617f                  | 1.0×10 <sup>-13</sup> | [SH2B3]                            | FALSE |
| 12q24.12 | 111910219 | rs10774625         | 4.1×10 <sup>-5</sup>  | -25611 | 0.934 | rs3184504          | tonsillectomy                 | 3.1×10 <sup>-10</sup> | [SH2B3]                            | FALSE |
| 12q24.12 | 111910219 | rs10774625         | 4.1×10 <sup>-5</sup>  | -25611 | 0.934 | rs3184504          | bmi                           | 6.1×10 <sup>-9</sup>  | [SH2B3]                            | TRUE  |
| 12q24.12 | 111910219 | rs10774625         | 4.1×10 <sup>-5</sup>  | -2788  | 1.000 | rs35350651         | any_animal_allergy            | 2.2×10 <sup>-12</sup> | [ATXN2]                            | TRUE  |
| 12q24.12 | 111910219 | rs10774625         | 4.1×10 <sup>-5</sup>  | 0      | 1.000 | rs10774625         | blood_pressure_meds           | 1.0×10 <sup>-17</sup> | [ATXN2]                            | FALSE |
| 12q24.12 | 111910219 | rs10774625         | 4.1×10 <sup>-5</sup>  | 0      | 1.000 | rs10774625         | hypothyroidism                | 1.4×10 <sup>-26</sup> | [ATXN2]                            | FALSE |
| 12q24.12 | 111910219 | rs10774625         | 4.1×10 <sup>-5</sup>  | 63139  | 0.871 | rs597808           | rosacea_all                   | 6.3×10 <sup>-8</sup>  | [ATXN2]                            | FALSE |
| 12q24.12 | 111910219 | rs10774625         | 4.1×10 <sup>-5</sup>  | 97537  | 0.933 | rs653178           | any_autoimmune                | 1.3×10 <sup>-20</sup> | [ATXN2]                            | FALSE |
| 12q24.31 | 121072799 | rs2859263          | 6.2×10 <sup>-5</sup>  | -10200 | 0.598 | rs71076641         | iqb.curlier_in_humidity       | 1.5×10 <sup>-7</sup>  | POP5--[]--CABP1                    |       |

|          |           |             |                       |        |       |             |                              |                       |                     |       |
|----------|-----------|-------------|-----------------------|--------|-------|-------------|------------------------------|-----------------------|---------------------|-------|
| 12q24.31 | 121363836 | rs2649994   | $7.2 \times 10^{-5}$  | 46842  | 0.639 | rs66627474  | any_plant_allergy            | $5.9 \times 10^{-7}$  | SPPL3--[ ]-HNF1A    | TRUE  |
| 12q24.31 | 123771032 | rs9739070   | $1.3 \times 10^{-11}$ | -28340 | 0.661 | rs63406760  | any_animal_allergy           | $2.3 \times 10^{-9}$  | C12orf65[ ]-CDK2AP1 |       |
| 12q24.31 | 123771032 | rs9739070   | $1.3 \times 10^{-11}$ | -28340 | 0.661 | rs63406760  | any_plant_allergy            | $2.4 \times 10^{-12}$ | C12orf65[ ]-CDK2AP1 |       |
| 12q24.31 | 123771032 | rs9739070   | $1.3 \times 10^{-11}$ | -28340 | 0.661 | rs63406760  | seasonal_allergies_broad     | $5.3 \times 10^{-12}$ | C12orf65[ ]-CDK2AP1 |       |
| 12q24.31 | 123817796 | rs12316131  | $8.1 \times 10^{-11}$ | 75138  | 0.844 | rs6576      | any_food_allergy             | $6.3 \times 10^{-7}$  | [SETD8]             | TRUE  |
| 12q24.31 | 123817796 | rs12316131  | $8.1 \times 10^{-11}$ | 75138  | 0.844 | rs6576      | dust_mites_allergy           | $4.6 \times 10^{-10}$ | [SETD8]             | TRUE  |
| 12q24.31 | 123817796 | rs12316131  | $8.1 \times 10^{-11}$ | 75138  | 0.844 | rs6576      | mold_allergy                 | $8.2 \times 10^{-9}$  | [SETD8]             | TRUE  |
| 12q24.31 | 123817796 | rs12316131  | $8.1 \times 10^{-11}$ | 75138  | 0.844 | rs6576      | height                       | $1.4 \times 10^{-17}$ | [SETD8]             | FALSE |
| 13q14.11 | 41582138  | rs61962744  | $4.6 \times 10^{-5}$  | -98281 | 0.559 | rs200638693 | rosacea_dx                   | $3.5 \times 10^{-8}$  | SLC25A15--[ ]-ELF1  |       |
| 13q14.11 | 42988546  | rs7328203   | $1.6 \times 10^{-7}$  | -29413 | 0.688 | rs58973023  | iqb.dot_bone_loss            | $1.9 \times 10^{-9}$  | AKAP11--[ ]-TNFSF11 | FALSE |
| 13q14.11 | 42988546  | rs7328203   | $1.6 \times 10^{-7}$  | -22852 | 0.688 | rs8001611   | osteoporosis                 | $2.9 \times 10^{-8}$  | AKAP11--[ ]-TNFSF11 | FALSE |
| 13q14.11 | 42988546  | rs7328203   | $1.6 \times 10^{-7}$  | -22852 | 0.688 | rs8001611   | osteoporosis_broad           | $8.9 \times 10^{-12}$ | AKAP11--[ ]-TNFSF11 | FALSE |
| 13q14.11 | 42988546  | rs7328203   | $1.6 \times 10^{-7}$  | 0      | 1.000 | rs7328203   | any_animal_allergy           | $1.0 \times 10^{-9}$  | AKAP11--[ ]-TNFSF11 | TRUE  |
| 13q14.11 | 42988546  | rs7328203   | $1.6 \times 10^{-7}$  | 0      | 1.000 | rs7328203   | dust_mites_allergy           | $2.1 \times 10^{-8}$  | AKAP11--[ ]-TNFSF11 | TRUE  |
| 13q14.11 | 42988546  | rs7328203   | $1.6 \times 10^{-7}$  | 0      | 1.000 | rs7328203   | seasonal_allergies_broad     | $2.4 \times 10^{-9}$  | AKAP11--[ ]-TNFSF11 | TRUE  |
| 13q14.11 | 42988546  | rs7328203   | $1.6 \times 10^{-7}$  | 378    | 0.937 | rs7327510   | any_plant_allergy            | $7.2 \times 10^{-10}$ | AKAP11--[ ]-TNFSF11 | TRUE  |
| 13q14.11 | 42988546  | rs7328203   | $1.6 \times 10^{-7}$  | 8002   | 0.906 | rs9533100   | tonsillectomy                | $1.2 \times 10^{-7}$  | AKAP11--[ ]-TNFSF11 | TRUE  |
| 13q14.3  | 54002500  | rs967302    | $7.0 \times 10^{-5}$  | -17786 | 0.753 | rs9527077   | other_allergy_general        | $3.0 \times 10^{-7}$  | OLFM4--[ ]          | TRUE  |
| 13q14.3  | 54002500  | rs967302    | $7.0 \times 10^{-5}$  | 46989  | 0.739 | rs17574479  | any_immune                   | $3.5 \times 10^{-7}$  | OLFM4--[ ]          | TRUE  |
| 13q21.32 | 67798928  | rs700329    | $2.9 \times 10^{-6}$  | -11661 | 0.700 | rs71427643  | any_plant_allergy            | $3.3 \times 10^{-7}$  | [PCDH9]             | TRUE  |
| 13q21.32 | 67798928  | rs700329    | $2.9 \times 10^{-6}$  | -10149 | 1.000 | rs9317655   | seasonal_allergies_broad     | $3.9 \times 10^{-7}$  | [PCDH9]             | TRUE  |
| 13q22.1  | 73649152  | rs45597035  | $6.2 \times 10^{-5}$  | 0      | 1.000 | rs45597035  | dust_mites_allergy           | $9.2 \times 10^{-7}$  | [KLF5]              | TRUE  |
| 13q32.3  | 100087719 | rs9300546   | $4.6 \times 10^{-5}$  | -14054 | 0.854 | rs6491500   | dust_mites_allergy           | $1.3 \times 10^{-7}$  | UBAC2--[ ]-TM9SF2   | TRUE  |
| 14q21.1  | 38058622  | rs3832946   | $1.1 \times 10^{-5}$  | -33524 | 0.663 | rs148131694 | tonsillectomy                | $7.8 \times 10^{-13}$ | MIPOL1--[ ]-FOXA1   |       |
| 14q21.1  | 38151255  | rs61977073  | $3.5 \times 10^{-10}$ | -58841 | 0.654 | rs464306    | any_animal_allergy           | $1.3 \times 10^{-11}$ | FOXA1--[ ]-TTC6     | TRUE  |
| 14q21.1  | 38151255  | rs61977073  | $3.5 \times 10^{-10}$ | -23380 | 0.846 | rs96718663  | any_plant_allergy            | $1.3 \times 10^{-9}$  | FOXA1--[ ]-TTC6     | TRUE  |
| 14q21.1  | 38151255  | rs61977073  | $3.5 \times 10^{-10}$ | 0      | 1.000 | rs61977073  | seasonal_allergies_broad     | $4.7 \times 10^{-11}$ | FOXA1--[ ]-TTC6     | TRUE  |
| 14q21.1  | 38151255  | rs61977073  | $3.5 \times 10^{-10}$ | 29558  | 0.819 | rs1022804   | dust_mites_allergy           | $2.1 \times 10^{-7}$  | FOXA1--[ ]-TTC6     | TRUE  |
| 14q32.2  | 99169703  | rs4905754   | $1.3 \times 10^{-5}$  | 898    | 0.972 | rs11851619  | any_plant_allergy            | $8.4 \times 10^{-7}$  | [ ]-C14orf177       | TRUE  |
| 14q32.2  | 99169703  | rs4905754   | $1.3 \times 10^{-5}$  | 6229   | 0.723 | rs61981314  | dust_mites_allergy           | $8.3 \times 10^{-7}$  | [ ]-C14orf177       | TRUE  |
| 15q15.1  | 41434729  | rs11855854  | $3.4 \times 10^{-5}$  | 16079  | 0.639 | rs13329237  | height                       | $7.5 \times 10^{-11}$ | IN080--[ ]-EXD1     | FALSE |
| 15q15.1  | 41563950  | rs28374715  | $1.2 \times 10^{-5}$  | -23763 | 0.533 | rs369676616 | poison_oak                   | $5.1 \times 10^{-7}$  | [CHP1]              |       |
| 15q15.1  | 41760790  | rs111421683 | $3.2 \times 10^{-7}$  | 0      | 1.000 | rs111421683 | any_animal_allergy           | $2.0 \times 10^{-7}$  | [RTF1]              | TRUE  |
| 15q15.1  | 41760790  | rs111421683 | $3.2 \times 10^{-7}$  | 21931  | 0.640 | rs12440111  | dust_mites_allergy           | $4.3 \times 10^{-7}$  | RTF1-[ ]-ITPKA      | TRUE  |
| 15q15.1  | 41760790  | rs111421683 | $3.2 \times 10^{-7}$  | 21938  | 0.592 | rs12440067  | insect_allergy               | $8.4 \times 10^{-9}$  | RTF1-[ ]-ITPKA      | TRUE  |
| 15q22.2  | 61070949  | rs36042015  | $3.5 \times 10^{-7}$  | -2245  | 0.583 | rs10519068  | any_asthma                   | $3.8 \times 10^{-11}$ | RORA--[ ]           |       |
| 15q22.2  | 61070949  | rs36042015  | $3.5 \times 10^{-7}$  | -536   | 0.532 | rs200066091 | iqb.took_meds_asthma_or_lung | $1.6 \times 10^{-10}$ | RORA--[ ]           |       |
| 15q22.2  | 61070949  | rs36042015  | $3.5 \times 10^{-7}$  | 0      | 1.000 | rs36042015  | any_animal_allergy           | $2.4 \times 10^{-11}$ | RORA--[ ]           | TRUE  |
| 15q22.2  | 61070949  | rs36042015  | $3.5 \times 10^{-7}$  | 0      | 1.000 | rs36042015  | dust_mites_allergy           | $2.2 \times 10^{-7}$  | RORA--[ ]           | TRUE  |
| 15q22.33 | 67371420  | rs12592283  | $3.3 \times 10^{-7}$  | 0      | 1.000 | rs12592283  | seasonal_allergies_broad     | $1.8 \times 10^{-8}$  | [SMAD3]             | TRUE  |
| 15q22.33 | 67468285  | rs17294280  | $3.6 \times 10^{-8}$  | -26535 | 0.695 | rs72743461  | juvenile_asthma              | $8.9 \times 10^{-7}$  | [SMAD3]             | TRUE  |
| 15q22.33 | 67468285  | rs17294280  | $3.6 \times 10^{-8}$  | -25689 | 0.709 | rs17293632  | allergic_asthma              | $6.2 \times 10^{-9}$  | [SMAD3]             | TRUE  |
| 15q22.33 | 67468285  | rs17294280  | $3.6 \times 10^{-8}$  | -25689 | 0.709 | rs17293632  | hayfever_all                 | $5.6 \times 10^{-13}$ | [SMAD3]             | TRUE  |
| 15q22.33 | 67468285  | rs17294280  | $3.6 \times 10^{-8}$  | -25689 | 0.709 | rs17293632  | iqb.took_meds_asthma_or_lung | $4.8 \times 10^{-21}$ | [SMAD3]             | TRUE  |
| 15q22.33 | 67468285  | rs17294280  | $3.6 \times 10^{-8}$  | -25689 | 0.709 | rs17293632  | juvenile_allergic_asthma     | $7.3 \times 10^{-12}$ | [SMAD3]             | TRUE  |
| 15q22.33 | 67468285  | rs17294280  | $3.6 \times 10^{-8}$  | -19922 | 0.695 | rs56375023  | any_asthma                   | $2.4 \times 10^{-21}$ | [SMAD3]             | TRUE  |
| 15q22.33 | 67468285  | rs17294280  | $3.6 \times 10^{-8}$  | -17980 | 0.702 | rs17228058  | thyroid_cancer               | $5.0 \times 10^{-10}$ | [SMAD3]             | TRUE  |
| 15q22.33 | 67468285  | rs17294280  | $3.6 \times 10^{-8}$  | -3994  | 0.786 | rs72743477  | any_food_allergy             | $2.2 \times 10^{-8}$  | [SMAD3]             | TRUE  |
| 15q22.33 | 67468285  | rs17294280  | $3.6 \times 10^{-8}$  | 0      | 1.000 | rs17294280  | any_animal_allergy           | $5.2 \times 10^{-13}$ | [SMAD3]             | TRUE  |
| 15q22.33 | 67468285  | rs17294280  | $3.6 \times 10^{-8}$  | 0      | 1.000 | rs17294280  | any_plant_allergy            | $1.6 \times 10^{-9}$  | [SMAD3]             | TRUE  |
| 15q22.33 | 67468285  | rs17294280  | $3.6 \times 10^{-8}$  | 0      | 1.000 | rs17294280  | dust_mites_allergy           | $2.2 \times 10^{-9}$  | [SMAD3]             | TRUE  |
| 15q22.33 | 67468285  | rs17294280  | $3.6 \times 10^{-8}$  | 0      | 1.000 | rs17294280  | mold_allergy                 | $2.2 \times 10^{-8}$  | [SMAD3]             | TRUE  |
| 16p13.13 | 11206463  | rs2110605   | $7.3 \times 10^{-14}$ | -86858 | 0.549 | rs71404439  | iqb.shampoo_type             | $5.9 \times 10^{-10}$ | [CLEC16A]           |       |
| 16p13.13 | 11206463  | rs2110605   | $7.3 \times 10^{-14}$ | -76084 | 0.614 | rs7197754   | mold_allergy                 | $1.4 \times 10^{-10}$ | [CLEC16A]           | TRUE  |
| 16p13.13 | 11192959  | rs111306289 | $2.8 \times 10^{-13}$ | -34074 | 0.609 | rs887864    | severe_acne                  | $5.7 \times 10^{-11}$ | [CLEC16A]           |       |
| 16p13.13 | 11192959  | rs111306289 | $2.8 \times 10^{-13}$ | -23276 | 0.675 | rs725613    | iqb.acne_as_teenager         | $3.5 \times 10^{-15}$ | [CLEC16A]           |       |
| 16p13.13 | 11206463  | rs2110605   | $7.3 \times 10^{-14}$ | -10422 | 0.584 | rs9941107   | sulfa_drug_allergy           | $3.3 \times 10^{-8}$  | [CLEC16A]           | TRUE  |
| 16p13.13 | 11206463  | rs2110605   | $7.3 \times 10^{-14}$ | -6785  | 0.594 | rs998592    | any_drug_allergy             | $1.7 \times 10^{-11}$ | [CLEC16A]           | TRUE  |
| 16p13.13 | 11277358  | rs11644510  | $1.5 \times 10^{-16}$ | -48230 | 0.509 | rs62026377  | other_animal_allergy         | $7.0 \times 10^{-7}$  | [CLEC16A]           | TRUE  |
| 16p13.13 | 11244658  | rs7206912   | $4.6 \times 10^{-6}$  | -15069 | 0.504 | rs2041733   | eczema                       | $9.2 \times 10^{-12}$ | [CLEC16A]           | TRUE  |
| 16p13.13 | 11277358  | rs11644510  | $1.5 \times 10^{-16}$ | -46655 | 0.504 | rs7203459   | any_asthma                   | $3.5 \times 10^{-15}$ | [CLEC16A]           | TRUE  |
| 16p13.13 | 11277358  | rs11644510  | $1.5 \times 10^{-16}$ | -46655 | 0.504 | rs7203459   | iqb.took_meds_asthma_or_lung | $4.6 \times 10^{-14}$ | [CLEC16A]           | TRUE  |
| 16p13.13 | 11192959  | rs111306289 | $2.8 \times 10^{-13}$ | 38898  | 0.553 | rs2867880   | allergic_asthma              | $2.6 \times 10^{-8}$  | [CLEC16A]           |       |
| 16p13.13 | 11277358  | rs11644510  | $1.5 \times 10^{-16}$ | 0      | 1.000 | rs11644510  | any_animal_allergy           | $2.7 \times 10^{-17}$ | CLEC16A--[ ]-SOCS1  | TRUE  |
| 16p13.13 | 11277358  | rs11644510  | $1.5 \times 10^{-16}$ | 0      | 1.000 | rs11644510  | any_food_allergy             | $2.5 \times 10^{-10}$ | CLEC16A--[ ]-SOCS1  | TRUE  |
| 16p13.13 | 11277358  | rs11644510  | $1.5 \times 10^{-16}$ | 0      | 1.000 | rs11644510  | any_immune                   | $4.7 \times 10^{-7}$  | CLEC16A--[ ]-SOCS1  | TRUE  |
| 16p13.13 | 11277358  | rs11644510  | $1.5 \times 10^{-16}$ | 0      | 1.000 | rs11644510  | any_plant_allergy            | $3.6 \times 10^{-13}$ | CLEC16A--[ ]-SOCS1  | TRUE  |
| 16p13.13 | 11277358  | rs11644510  | $1.5 \times 10^{-16}$ | 0      | 1.000 | rs11644510  | dust_mites_allergy           | $2.3 \times 10^{-12}$ | CLEC16A--[ ]-SOCS1  | TRUE  |
| 16p13.13 | 11277358  | rs11644510  | $1.5 \times 10^{-16}$ | 0      | 1.000 | rs11644510  | hayfever_all                 | $1.8 \times 10^{-13}$ | CLEC16A--[ ]-SOCS1  | TRUE  |
| 16p13.13 | 11277358  | rs11644510  | $1.5 \times 10^{-16}$ | 0      | 1.000 | rs11644510  | seasonal_allergies_broad     | $1.1 \times 10^{-16}$ | CLEC16A--[ ]-SOCS1  | TRUE  |
| 16p13.13 | 11277358  | rs11644510  | $1.5 \times 10^{-16}$ | 2273   | 0.593 | rs28534539  | juvenile_allergic_asthma     | $1.6 \times 10^{-7}$  | CLEC16A--[ ]-SOCS1  | TRUE  |
| 16p13.13 | 11295972  | rs37940     | $9.0 \times 10^{-6}$  | 0      | 1.000 | rs37940     | other_plant_allergy          | $4.0 \times 10^{-7}$  | CLEC16A--[ ]-SOCS1  | TRUE  |

|          |          |                  |                       |        |       |                  |                              |                       |                  |       |
|----------|----------|------------------|-----------------------|--------|-------|------------------|------------------------------|-----------------------|------------------|-------|
| 16p12.1  | 27403469 | rs1119132        | $1.0 \times 10^{-5}$  | 10909  | 0.848 | rs6498021        | any_animal_allergy           | $8.4 \times 10^{-10}$ | IL4R--[]--IL21R  | TRUE  |
| 16p11.2  | 28347140 | rs2726036        | $1.8 \times 10^{-6}$  | -9101  | 0.742 | rs2726033        | obesity                      | $3.0 \times 10^{-7}$  | SBK1-[]--NPIPL1  | FALSE |
| 16p11.2  | 28565953 | rs7187604        | $4.5 \times 10^{-7}$  | -92488 | 0.559 | rs137892064      | any_food_allergy             | $2.3 \times 10^{-7}$  | [NPIPL1]         | TRUE  |
| 16p11.2  | 28580829 | rs56396270       | $3.8 \times 10^{-7}$  | -95688 | 0.820 | rs1492999        | heart_metabolic_disease      | $2.1 \times 10^{-7}$  | [NPIPL1]         | FALSE |
| 16p11.2  | 28620572 | rs750155         | $9.2 \times 10^{-8}$  | -81186 | 0.543 | rs189278832      | iqb.stretch_marks            | $7.3 \times 10^{-11}$ | [NPIPL1]         | FALSE |
| 16p11.2  | 28620572 | rs750155         | $9.2 \times 10^{-8}$  | -81186 | 0.543 | rs189278832      | stretch_marks_any            | $7.8 \times 10^{-11}$ | [NPIPL1]         | FALSE |
| 16p11.2  | 28620572 | rs750155         | $9.2 \times 10^{-8}$  | -74985 | 0.510 | rs231976         | mosquito_severe              | $1.7 \times 10^{-7}$  | [NPIPL1]         | TRUE  |
| 16p11.2  | 28620572 | rs750155         | $9.2 \times 10^{-8}$  | -13040 | 0.512 | rs4115668        | any_plant_allergy            | $3.8 \times 10^{-8}$  | [NPIPL1,SULT1A2] | TRUE  |
| 16p11.2  | 28608341 | rs762633         | $3.2 \times 10^{-7}$  | 9547   | 0.675 | rs74459546       | stretch_marks_qtl            | $1.0 \times 10^{-8}$  | [NPIPL1,SULT1A1] | FALSE |
| 16p11.2  | 28620572 | rs750155         | $9.2 \times 10^{-8}$  | 0      | 1.000 | rs750155         | seasonal_allergies_broad     | $6.1 \times 10^{-8}$  | [NPIPL1,SULT1A1] | TRUE  |
| 16p11.2  | 28913787 | rs7189927        | $2.4 \times 10^{-7}$  | -47871 | 0.846 | rs7187333        | bmi                          | $2.6 \times 10^{-17}$ | [NPIPL1]         | FALSE |
| 16p11.2  | 28913787 | rs7189927        | $2.4 \times 10^{-7}$  | -42587 | 0.830 | rs199766562      | weight                       | $9.6 \times 10^{-21}$ | [NPIPL1]         | FALSE |
| 16p11.2  | 28913787 | rs7189927        | $2.4 \times 10^{-7}$  | -14994 | 0.928 | rs6565259        | iqb.ingrown_hair_bumps       | $1.4 \times 10^{-7}$  | [NPIPL1,ATP2A1]  | FALSE |
| 16p11.2  | 28913787 | rs7189927        | $2.4 \times 10^{-7}$  | 5554   | 0.988 | rs7206214        | shoe_size_normalized         | $5.5 \times 10^{-11}$ | [NPIPL1,RABEP2]  | FALSE |
| 16q23.1  | 77506441 | rs2199534        | $7.0 \times 10^{-5}$  | -3837  | 0.585 | rs2220809        | iqb.acne_as_teenager         | $1.8 \times 10^{-8}$  | ADAMTS18--[]---  | TRUE  |
| 17p13.3  | 2481492  | rs140600009      | $2.6 \times 10^{-5}$  | 50780  | 0.611 | rs1266472        | seasonal_allergies_broad     | $1.0 \times 10^{-7}$  | NUDT7            | TRUE  |
| 17p13.2  | 4535314  | rs34210653       | $1.6 \times 10^{-6}$  | 0      | 1.000 | rs34210653       | any_animal_allergy           | $1.3 \times 10^{-10}$ | [PAFAH1B1]       | TRUE  |
| 17p13.2  | 4535314  | rs34210653       | $1.6 \times 10^{-6}$  | 0      | 1.000 | rs34210653       | any_animal_allergy           | $1.3 \times 10^{-10}$ | [ALOX15]         | TRUE  |
| 17p13.1  | 7387350  | rs67486302       | $2.2 \times 10^{-5}$  | -25813 | 0.608 | rs55785967       | seasonal_allergies_broad     | $5.6 \times 10^{-7}$  | [ALOX15]         | TRUE  |
| 17p13.1  | 7386428  | rs11078680       | $1.1 \times 10^{-5}$  | -10017 | 0.792 | rs7209131        | height                       | $2.6 \times 10^{-20}$ | CHRN1-[]-ZBTB4   | TRUE  |
| 17p13.1  | 7386428  | rs11078680       | $1.1 \times 10^{-5}$  | -2444  | 0.940 | rs8076642        | myopia_v_hyperopia           | $4.3 \times 10^{-9}$  | [ZBTB4]          | TRUE  |
| 17p13.1  | 7386428  | rs11078680       | $1.1 \times 10^{-5}$  | -2444  | 0.940 | rs8076642        | glasses_any                  | $1.6 \times 10^{-8}$  | [ZBTB4]          | FALSE |
| 17p12    | 11188558 | rs56142648       | $9.8 \times 10^{-6}$  | 742    | 0.884 | rs9897249        | nearsightedness              | $7.9 \times 10^{-15}$ | TNFSF12-TNFSF13  | FALSE |
| 17p12    | 11188558 | rs56142648       | $9.8 \times 10^{-6}$  | 742    | 0.884 | rs9897249        | any_plant_allergy            | $9.8 \times 10^{-7}$  | [SHISA6]         | TRUE  |
| 17p12    | 11188558 | rs56142648       | $9.8 \times 10^{-6}$  | 742    | 0.884 | rs9897249        | seasonal_allergies_broad     | $4.4 \times 10^{-7}$  | [SHISA6]         | TRUE  |
| 17p12    | 11196479 | rs9303035        | $6.5 \times 10^{-5}$  | 764    | 0.993 | rs8066969        | depression_anxiety_meds      | $3.9 \times 10^{-7}$  | [SHISA6]         | TRUE  |
| 17q12    | 37829570 | rs903504         | $7.9 \times 10^{-6}$  | 32148  | 0.542 | rs2952155        | chronic_bronchitis           | $4.9 \times 10^{-10}$ | [ERBB2]          | TRUE  |
| 17q12    | 37912377 | rs12946510       | $2.6 \times 10^{-13}$ | -18893 | 0.514 | rs4795393        | crohns_or_ulcerative_colitis | $5.3 \times 10^{-7}$  | MIEN1-[]-GRB7    | FALSE |
| 17q12    | 38067020 | rs4795400        | $2.8 \times 10^{-15}$ | -40851 | 0.791 | rs11655198       | any_asthma                   | $1.0 \times 10^{-63}$ | [ZPBP2]          | TRUE  |
| 17q12    | 38067020 | rs4795400        | $2.8 \times 10^{-15}$ | -34832 | 0.870 | rs12939457       | any_plant_allergy            | $1.6 \times 10^{-12}$ | [ZPBP2]          | TRUE  |
| 17q12    | 38067020 | rs4795400        | $2.8 \times 10^{-15}$ | -34832 | 0.870 | rs12939457       | hayfever_all                 | $1.7 \times 10^{-19}$ | [ZPBP2]          | TRUE  |
| 17q12    | 38067020 | rs4795400        | $2.8 \times 10^{-15}$ | -4078  | 0.922 | rs35196450       | any_food_allergy             | $9.8 \times 10^{-8}$  | [GSDMB]          | TRUE  |
| 17q12    | 38067020 | rs4795400        | $2.8 \times 10^{-15}$ | -4078  | 0.922 | rs35196450       | mold_allergy                 | $2.8 \times 10^{-12}$ | [GSDMB]          | TRUE  |
| 17q12    | 38067020 | rs4795400        | $2.8 \times 10^{-15}$ | -4078  | 0.922 | rs35196450       | seasonal_allergies_broad     | $1.5 \times 10^{-14}$ | [GSDMB]          | TRUE  |
| 17q12    | 38062943 | 17:38062943:CA_C | $5.5 \times 10^{-15}$ | 0      | 1.000 | 17:38062943:CA_C | iqb.took_meds_asthma_or_lung | $1.2 \times 10^{-36}$ | [GSDMB]          | TRUE  |
| 17q12    | 38062943 | 17:38062943:CA_C | $5.5 \times 10^{-15}$ | 0      | 1.000 | 17:38062943:CA_C | juvenile_allergic_asthma     | $2.5 \times 10^{-32}$ | [GSDMB]          | TRUE  |
| 17q12    | 38062943 | 17:38062943:CA_C | $5.5 \times 10^{-15}$ | 0      | 1.000 | 17:38062943:CA_C | tree_nuts_allergy            | $6.2 \times 10^{-8}$  | [GSDMB]          | TRUE  |
| 17q12    | 38067020 | rs4795400        | $2.8 \times 10^{-15}$ | -780   | 0.822 | rs2290400        | juvenile_asthma              | $1.0 \times 10^{-28}$ | [GSDMB]          | TRUE  |
| 17q12    | 38067020 | rs4795400        | $2.8 \times 10^{-15}$ | 1023   | 0.818 | rs869402         | allergic_asthma              | $2.5 \times 10^{-23}$ | [GSDMB]          | TRUE  |
| 17q12    | 38067020 | rs4795400        | $2.8 \times 10^{-15}$ | 1494   | 0.818 | rs1011082        | any_animal_allergy           | $4.1 \times 10^{-19}$ | [GSDMB]          | TRUE  |
| 17q12    | 38067020 | rs4795400        | $2.8 \times 10^{-15}$ | 6948   | 0.943 | rs9303279        | dust_mites_allergy           | $4.9 \times 10^{-15}$ | [GSDMB]          | TRUE  |
| 17q21.1  | 38121993 | rs3894194        | $1.5 \times 10^{-10}$ | 1251   | 0.777 | rs5820312        | nonallergic_asthma           | $1.5 \times 10^{-8}$  | [GSDMA]          | TRUE  |
| 17q21.32 | 47328183 | rs28397663       | $4.3 \times 10^{-8}$  | -47882 | 0.578 | rs4794029        | nearsightedness              | $1.0 \times 10^{-8}$  | B4GALNT2--[]-    | FALSE |
| 17q21.32 | 47328183 | rs28397663       | $4.3 \times 10^{-8}$  | -7765  | 0.620 | rs36006455       | nearsightedness              | $1.0 \times 10^{-8}$  | GN2              | FALSE |
| 17q21.32 | 47328183 | rs28397663       | $4.3 \times 10^{-8}$  | 0      | 1.000 | rs36006455       | glasses_any                  | $5.4 \times 10^{-7}$  | PHOSPHO1--[]-    | FALSE |
| 17q21.32 | 47328183 | rs28397663       | $4.3 \times 10^{-8}$  | 0      | 1.000 | rs28397663       | dust_mites_allergy           | $5.9 \times 10^{-7}$  | FLJ40194         | TRUE  |
| 17q21.32 | 47328183 | rs28397663       | $4.3 \times 10^{-8}$  | 0      | 1.000 | rs28397663       | seasonal_allergies_broad     | $4.2 \times 10^{-7}$  | [FLJ40194]       | TRUE  |
| 17q21.32 | 47328183 | rs28397663       | $4.3 \times 10^{-8}$  | 76445  | 0.889 | rs62076439       | any_animal_allergy           | $2.0 \times 10^{-10}$ | [ZNF652]         | TRUE  |
| 17q21.32 | 47328183 | rs28397663       | $4.3 \times 10^{-8}$  | 76445  | 0.889 | rs62076439       | any_asthma                   | $5.1 \times 10^{-7}$  | [ZNF652]         | TRUE  |
| 17q21.33 | 47425096 | rs202005205      | $2.4 \times 10^{-6}$  | -16621 | 0.957 | rs12937923       | iqb.excess_hair              | $5.6 \times 10^{-8}$  | [ZNF652]         | TRUE  |
| 17q21.32 | 47328183 | rs28397663       | $4.3 \times 10^{-8}$  | 94327  | 0.900 | rs35073649       | any_cvd                      | $1.5 \times 10^{-9}$  | [ZNF652]         | TRUE  |
| 17q21.33 | 47444572 | 17:47444572:A_AG | $3.5 \times 10^{-5}$  | 0      | 1.000 | 17:47444572:A_AG | blood_pressure_meds          | $4.1 \times 10^{-10}$ | ZNF652-[]--PHB   | TRUE  |
| 17q21.33 | 47444572 | 17:47444572:A_AG | $3.5 \times 10^{-5}$  | 0      | 1.000 | 17:47444572:A_AG | high_blood_pressure          | $4.4 \times 10^{-10}$ | ZNF652-[]--PHB   | TRUE  |
| 17q23.3  | 61979122 | rs2665820        | $8.7 \times 10^{-5}$  | 3      | 0.995 | rs2727347        | penicillin_allergy           | $3.8 \times 10^{-7}$  | CSH1-[]-CSHL1    | TRUE  |
| 17q24.2  | 66015108 | rs201402027      | $2.6 \times 10^{-5}$  | -67468 | 0.515 | rs12449442       | weight                       | $4.6 \times 10^{-7}$  | [BPTF]           | TRUE  |
| 19p13.3  | 1162376  | rs11084888       | $9.6 \times 10^{-6}$  | -2199  | 0.716 | rs60634368       | height                       | $2.9 \times 10^{-7}$  | [SBN02]          | FALSE |
| 19p13.3  | 1162376  | rs11084888       | $9.6 \times 10^{-6}$  | 4236   | 0.891 | rs201183181      | any_plant_allergy            | $2.3 \times 10^{-7}$  | [SBN02]          | TRUE  |
| 19p13.3  | 1162376  | rs11084888       | $9.6 \times 10^{-6}$  | 4236   | 0.891 | rs201183181      | hayfever_all                 | $5.4 \times 10^{-7}$  | [SBN02]          | TRUE  |
| 19p13.3  | 1219553  | rs11084889       | $4.9 \times 10^{-5}$  | -15336 | 0.906 | rs7254997        | insect_allergy               | $3.9 \times 10^{-7}$  | SBN02-[]-STK11   | TRUE  |
| 19p13.3  | 1219553  | rs11084889       | $4.9 \times 10^{-5}$  | -11481 | 0.937 | rs7256801        | any_animal_allergy           | $7.6 \times 10^{-7}$  | [STK11]          | TRUE  |
| 19p13.11 | 18125240 | rs73026614       | $4.6 \times 10^{-5}$  | 456    | 0.575 | rs437940         | iqb.sweat_during_workout     | $1.1 \times 10^{-7}$  | ARRDC2[]--       | FALSE |
| 19q13.11 | 33721455 | rs10414065       | $1.9 \times 10^{-5}$  | 0      | 1.000 | rs10414065       | any_animal_allergy           | $6.1 \times 10^{-11}$ | IL12RB1          | FALSE |
| 19q13.11 | 33721455 | rs10414065       | $1.9 \times 10^{-5}$  | 0      | 1.000 | rs10414065       | any_food_allergy             | $4.3 \times 10^{-8}$  | SLC7A10-[]--     | TRUE  |
| 19q13.11 | 33721455 | rs10414065       | $1.9 \times 10^{-5}$  | 0      | 1.000 | rs10414065       | dust_mites_allergy           | $3.5 \times 10^{-8}$  | CEBPA            | TRUE  |
| 19q13.11 | 33721455 | rs10414065       | $1.9 \times 10^{-5}$  | 0      | 1.000 | rs10414065       | other_food_allergy           | $3.5 \times 10^{-7}$  | SLC7A10-[]--     | TRUE  |
| 20q13.2  | 52184944 | rs1555926        | $5.4 \times 10^{-5}$  | -5122  | 0.500 | rs2766670        | dust_mites_allergy           | $1.6 \times 10^{-7}$  | CEBPA            | TRUE  |
| 20q13.33 | 62288752 | rs3761124        | $1.9 \times 10^{-6}$  | -12908 | 0.764 | rs6010986        | myopia_v_hyperopia           | $1.5 \times 10^{-7}$  | SLC7A10-[]--     | TRUE  |
| 20q13.33 | 62288752 | rs3761124        | $1.9 \times 10^{-6}$  | -10830 | 0.662 | rs4809319        | nearsightedness              | $7.5 \times 10^{-9}$  | TSH22-[]-        | FALSE |
| 20q13.33 | 62288752 | rs3761124        | $1.9 \times 10^{-6}$  | 26650  | 0.704 | rs201926957      | seasonal_allergies_broad     | $1.9 \times 10^{-7}$  | ZNF217           | TRUE  |
| 20q13.33 | 62288752 | rs3761124        | $1.9 \times 10^{-6}$  | 39990  | 0.747 | rs909341         | eczema                       | $2.1 \times 10^{-19}$ | [STMN3]          | TRUE  |
| 20q13.33 | 62288752 | rs3761124        | $1.9 \times 10^{-6}$  | 60935  | 0.582 | rs202143810      | prostate_cancer              | $1.0 \times 10^{-7}$  | [TMN3]           | FALSE |
| 20q13.33 | 62315593 | rs3787092        | $2.6 \times 10^{-5}$  | 37044  | 0.518 | rs8125514        | height                       | $2.5 \times 10^{-7}$  | [RTEL1]          | TRUE  |
| 21q22.2  | 40644110 | rs145104523      | $9.1 \times 10^{-5}$  | -88549 | 0.988 | rs117143374      | age_first_menses             | $4.4 \times 10^{-8}$  | [TNFRSF6B]       | TRUE  |
| 21q22.2  | 40594877 | 21:40594877:A_AG | $1.7 \times 10^{-6}$  | 0      | 1.000 | 21:40594877:A_AG | any_plant_allergy            | $6.0 \times 10^{-7}$  | [ZGPAT]          | TRUE  |
| 21q22.2  | 40685662 | rs11910906       | $5.3 \times 10^{-6}$  | -64259 | 0.598 | rs35265000       | ever_tobacco_user            | $2.3 \times 10^{-10}$ | [ZGPAT]          | TRUE  |
| 21q22.2  | 40685662 | rs11910906       | $5.3 \times 10^{-6}$  | 23300  | 0.528 | rs201178342      | iqb.age_started_reading      | $7.7 \times 10^{-7}$  | BRWD1-IT2--[]-   | TRUE  |
| 21q22.3  | 44840873 | rs75559179       | $1.3 \times 10^{-5}$  | 5553   | 0.824 | rs76081789       | any_plant_allergy            | $5.4 \times 10^{-7}$  | HMG1             | TRUE  |
| 21q22.3  | 44840873 | rs75559179       | $1.3 \times 10^{-5}$  | 5553   | 0.824 | rs76081789       | seasonal_allergies_broad     | $1.3 \times 10^{-7}$  | [SIK1]           | TRUE  |
| 22q13.2  | 41545623 | rs117597170      | $9.5 \times 10^{-6}$  | 0      | 1.000 | rs117597170      | dust_mites_allergy           | $2.6 \times 10^{-8}$  | [SIK1]           | TRUE  |
| 22q13.2  | 42945888 | rs136986         | $2.2 \times 10^{-5}$  | -4498  | 0.506 | rs136978         | any_animal_allergy           | $4.8 \times 10^{-7}$  | [EP300]          | TRUE  |
| 22q13.2  | 42945888 | rs136986         | $2.2 \times 10^{-5}$  | -4498  | 0.506 | rs136978         | any_plant_allergy            | $6.6 \times 10^{-8}$  | RRP7A--[]-       | TRUE  |

|         |           |            |                      |       |       |             |                          |                      |                                              |      |
|---------|-----------|------------|----------------------|-------|-------|-------------|--------------------------|----------------------|----------------------------------------------|------|
| 22q13.2 | 42945888  | rs136986   | $2.2 \times 10^{-5}$ | -4498 | 0.506 | rs136978    | seasonal_allergies_broad | $4.7 \times 10^{-9}$ | RRP7A--[]-<br>SERHL2<br>RRP7A--[]-<br>SERHL2 | TRUE |
| 22q13.2 | 42945888  | rs136986   | $2.2 \times 10^{-5}$ | -1910 | 0.512 | rs200044896 | leg_jiggle               | $9.9 \times 10^{-8}$ | SERHL2                                       |      |
| Xq28    | 155176144 | rs7053404  | $1.6 \times 10^{-6}$ | 0     | 1.000 | rs7053404   | any_animal_allergy       | $7.6 \times 10^{-7}$ | VAMP7-[]--IL9R                               | TRUE |
| Xq28    | 155185332 | rs74887446 | $1.3 \times 10^{-6}$ | 0     | 1.000 | rs74887446  | mold_allergy             | $1.5 \times 10^{-8}$ | VAMP7-[]--IL9R                               | TRUE |
| Xq28    | 155185332 | rs74887446 | $1.3 \times 10^{-6}$ | 0     | 1.000 | rs74887446  | seasonal_allergies_broad | $8.3 \times 10^{-7}$ | VAMP7-[]--IL9R                               | TRUE |

## Regional Association Plots

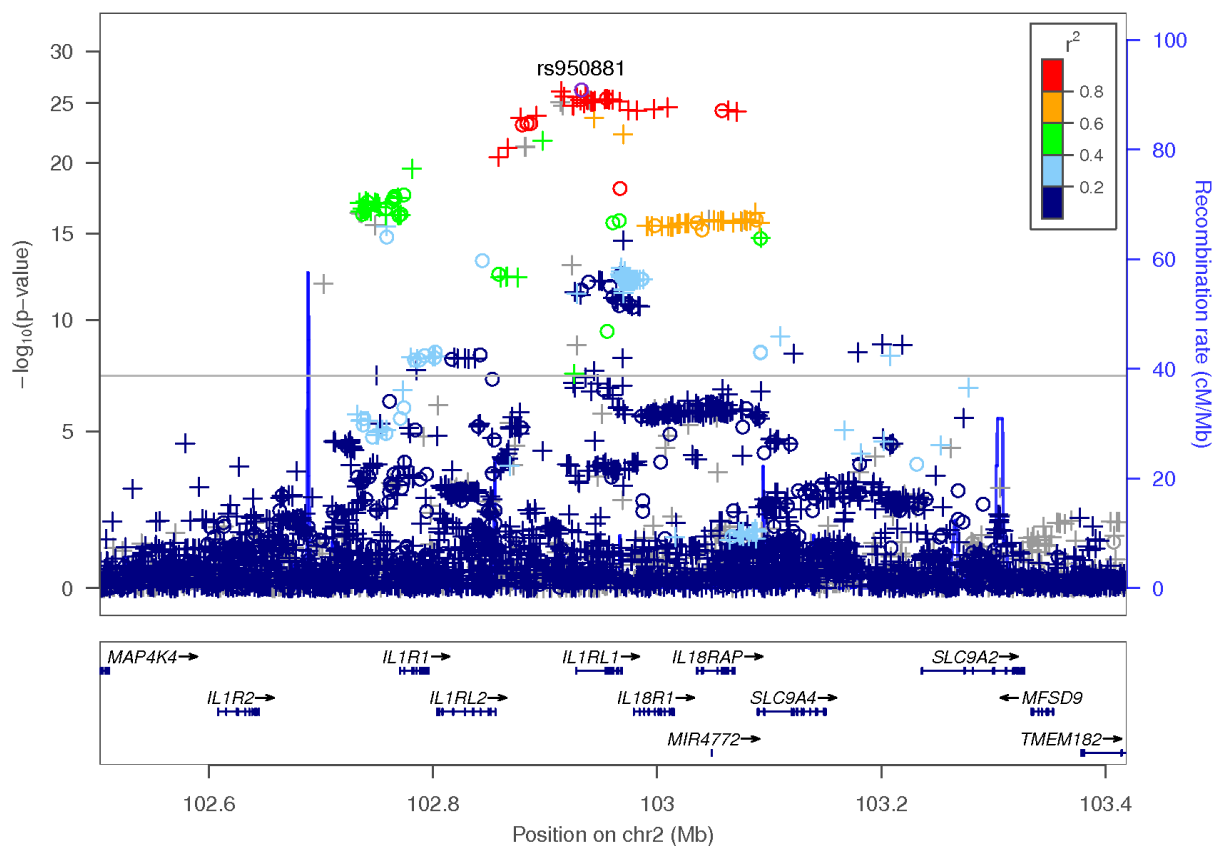



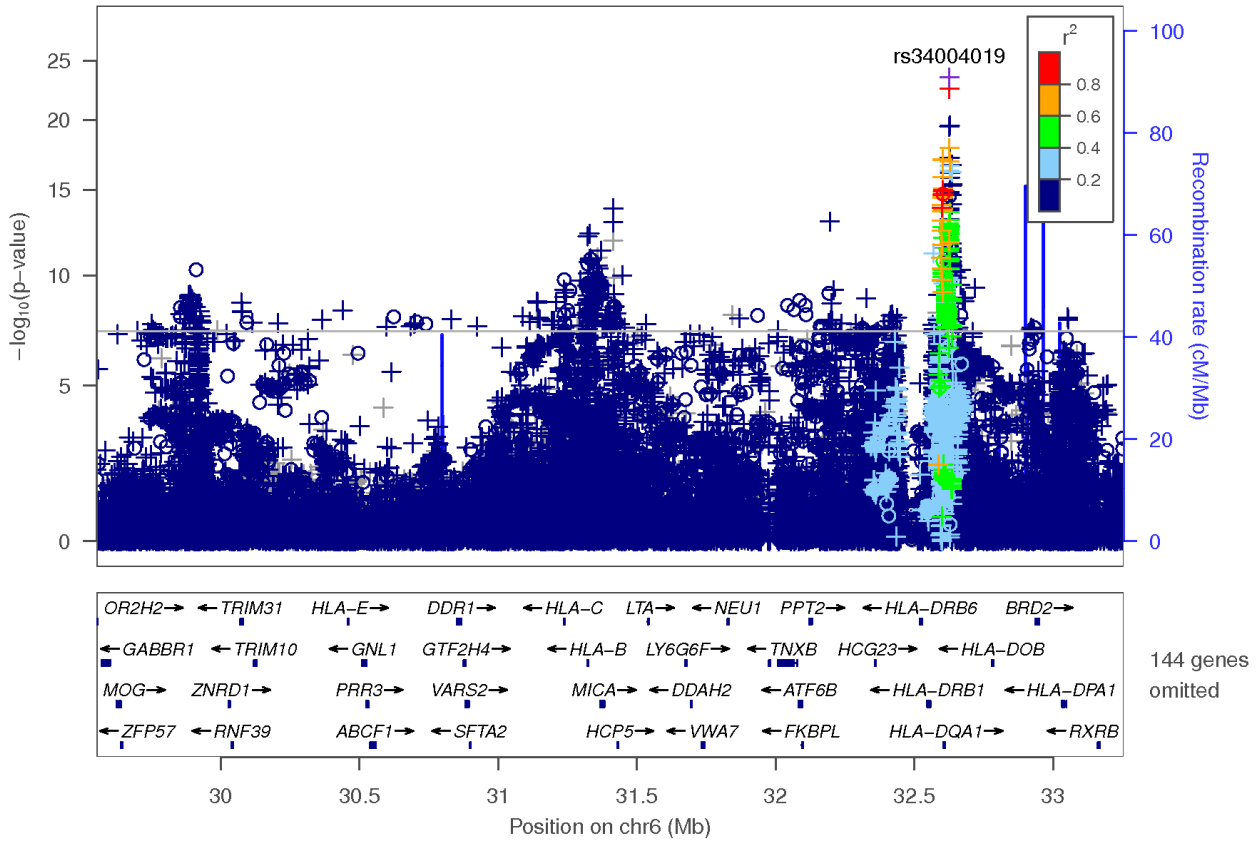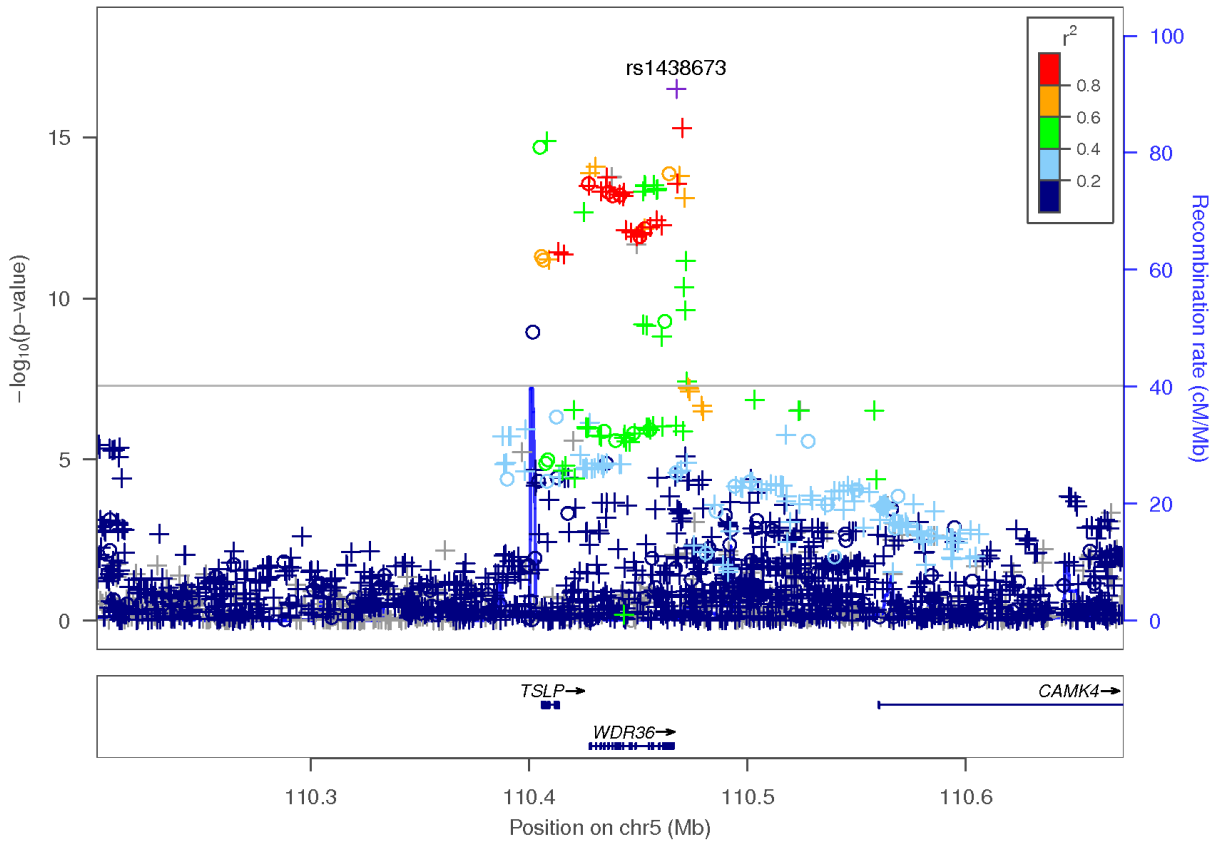

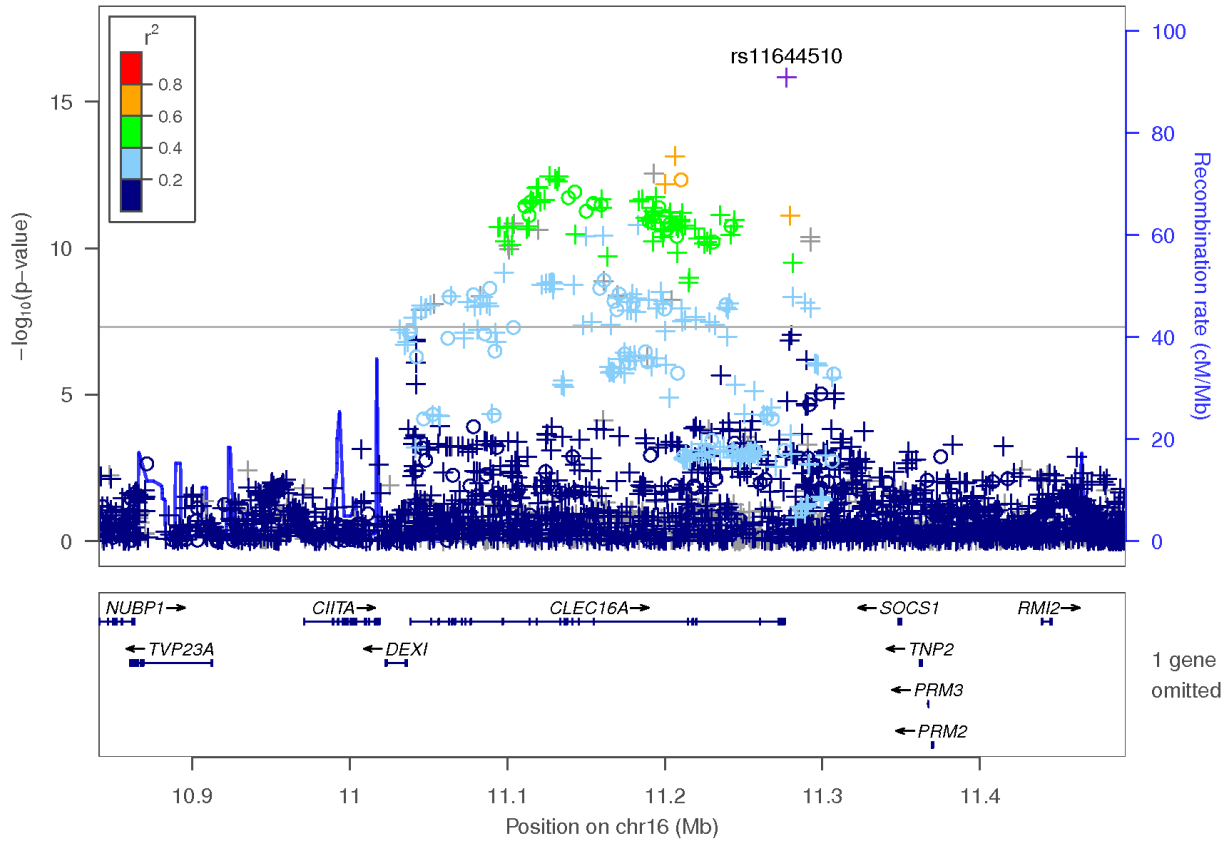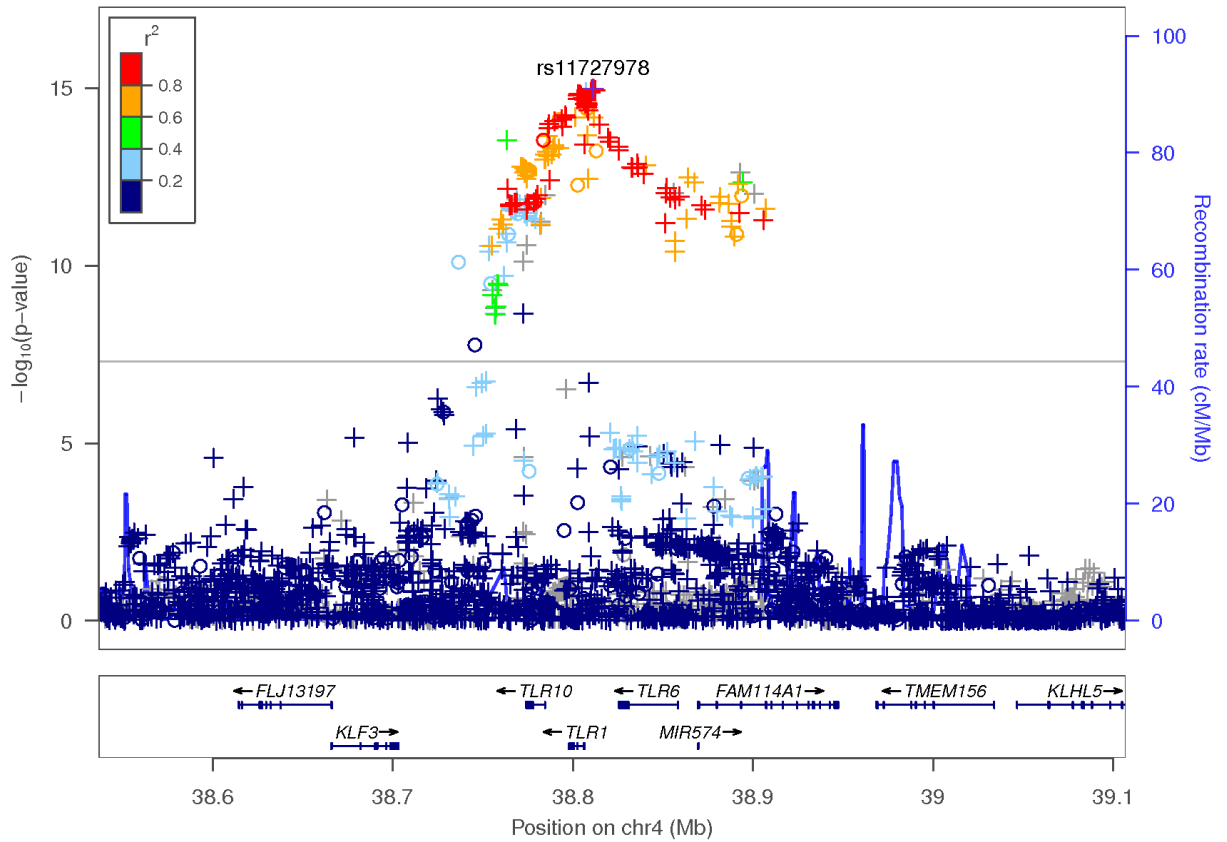

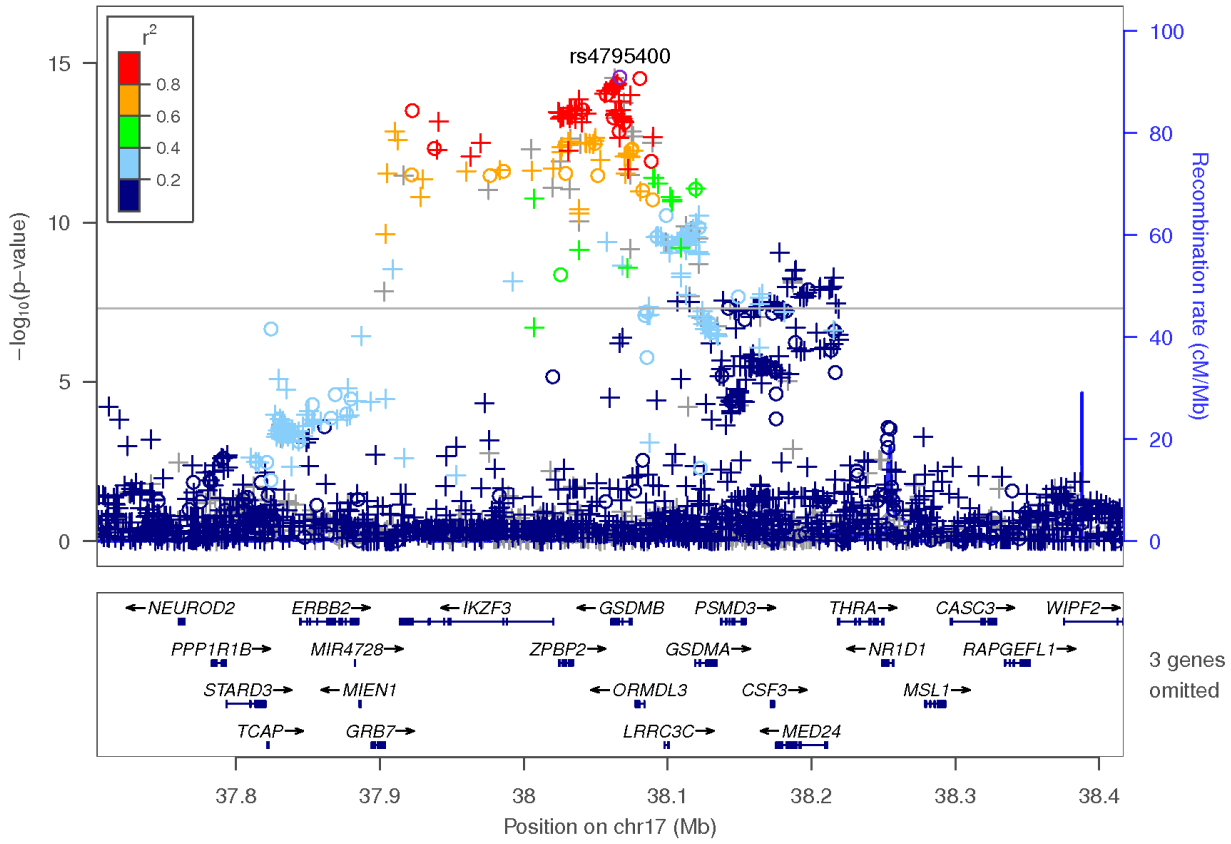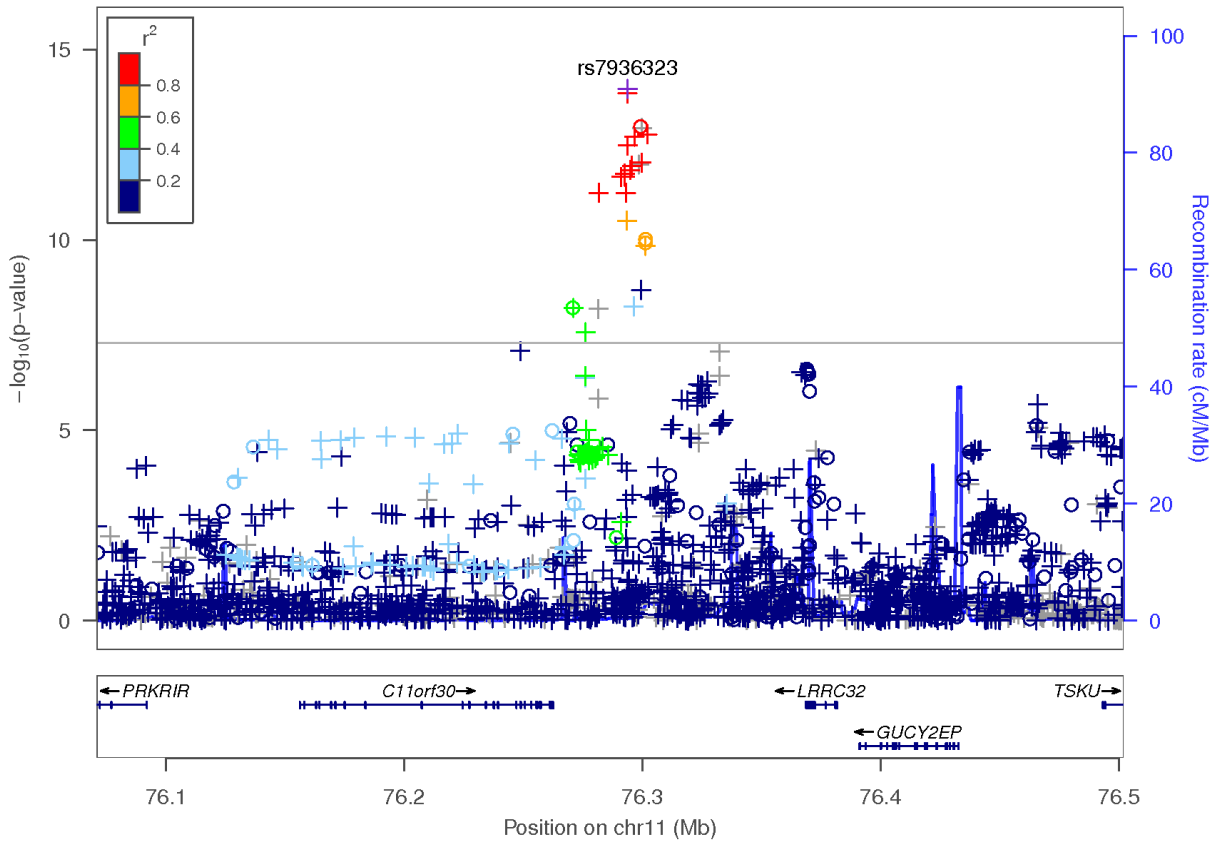

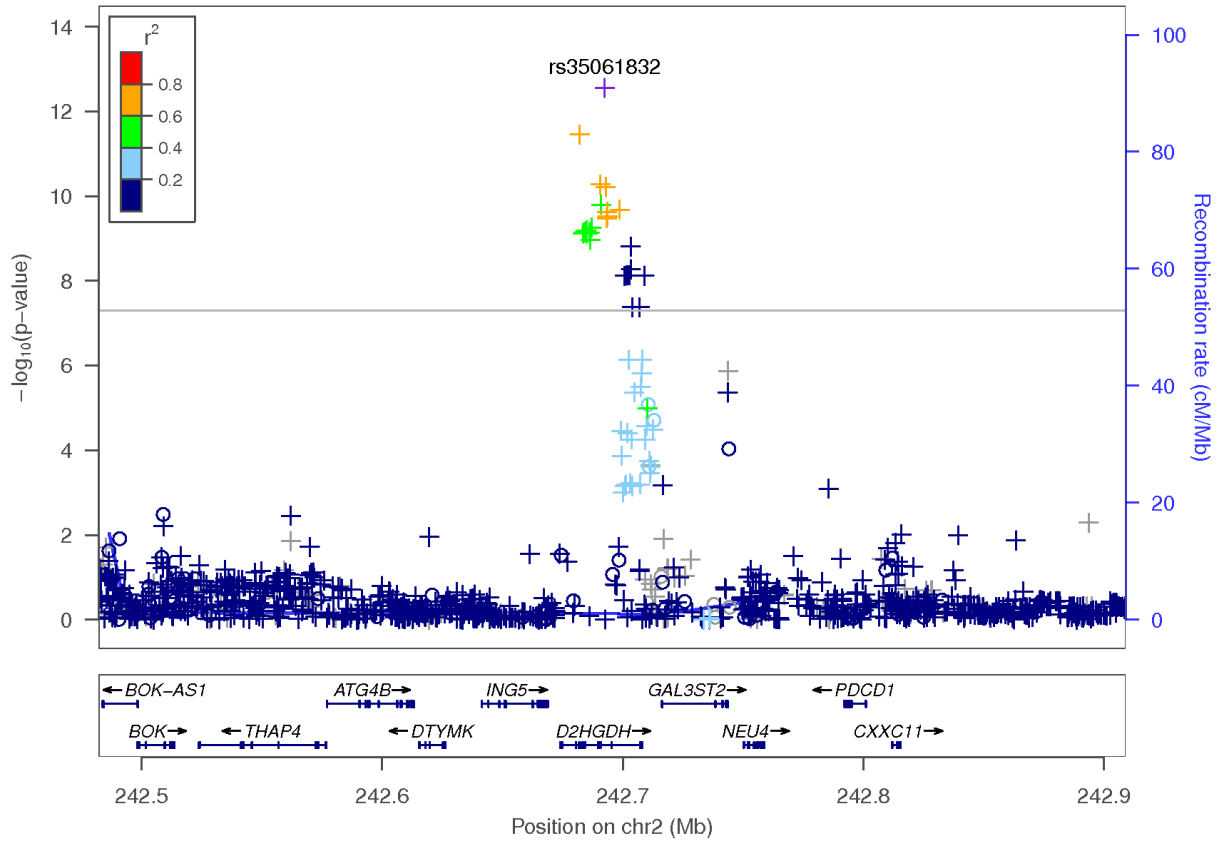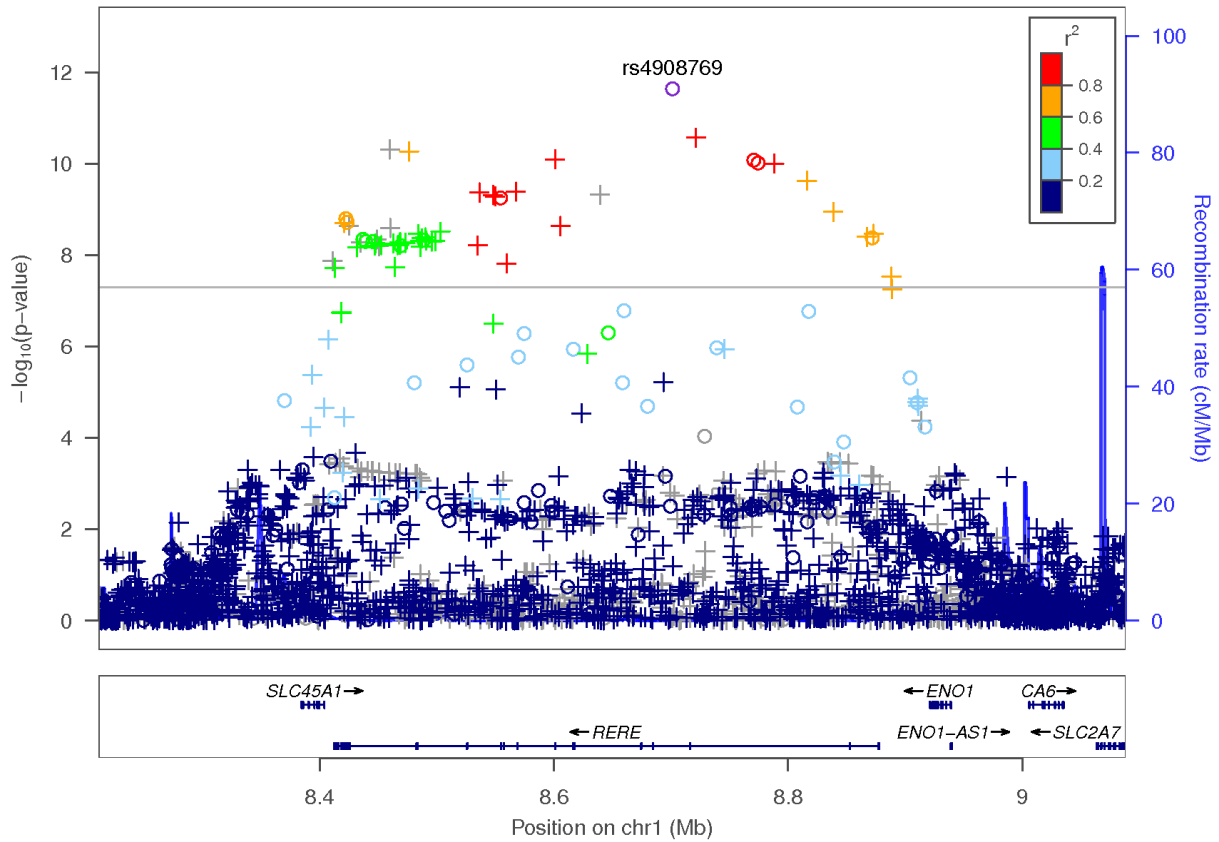

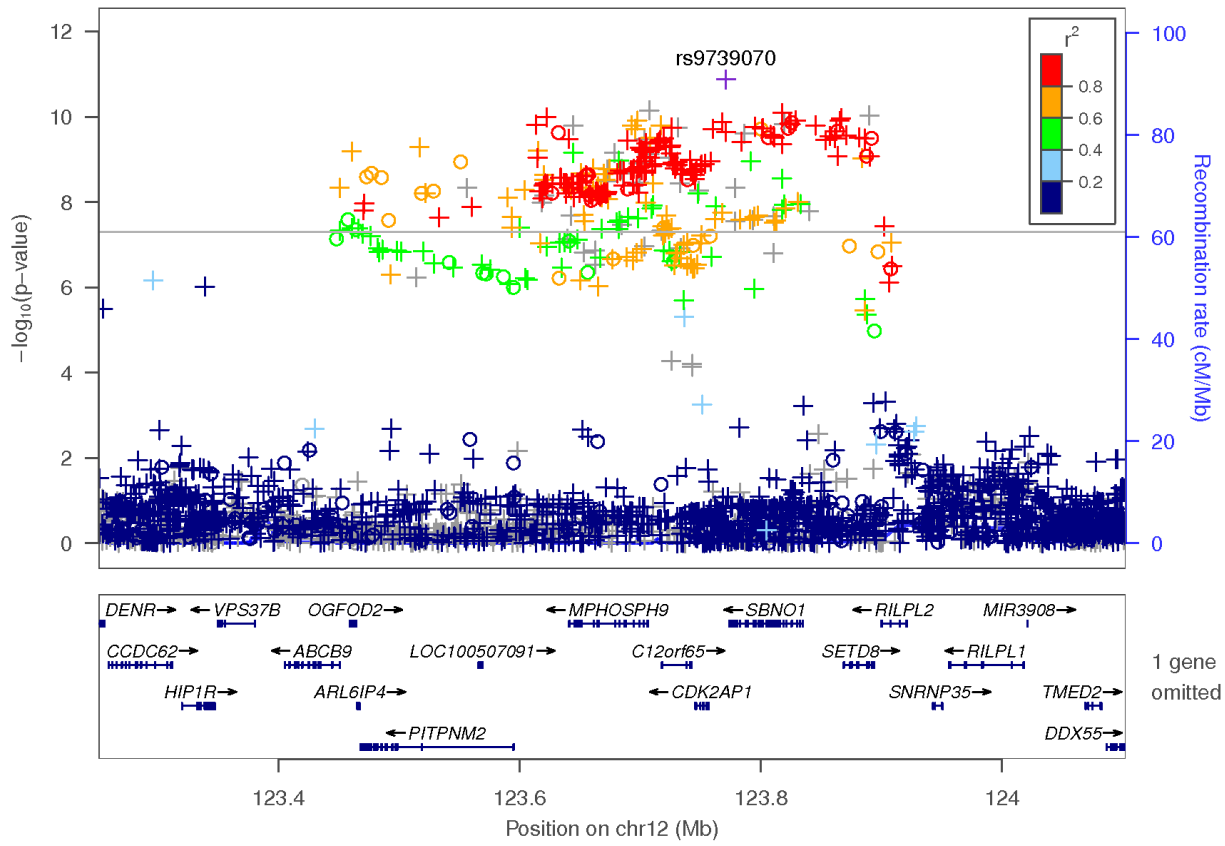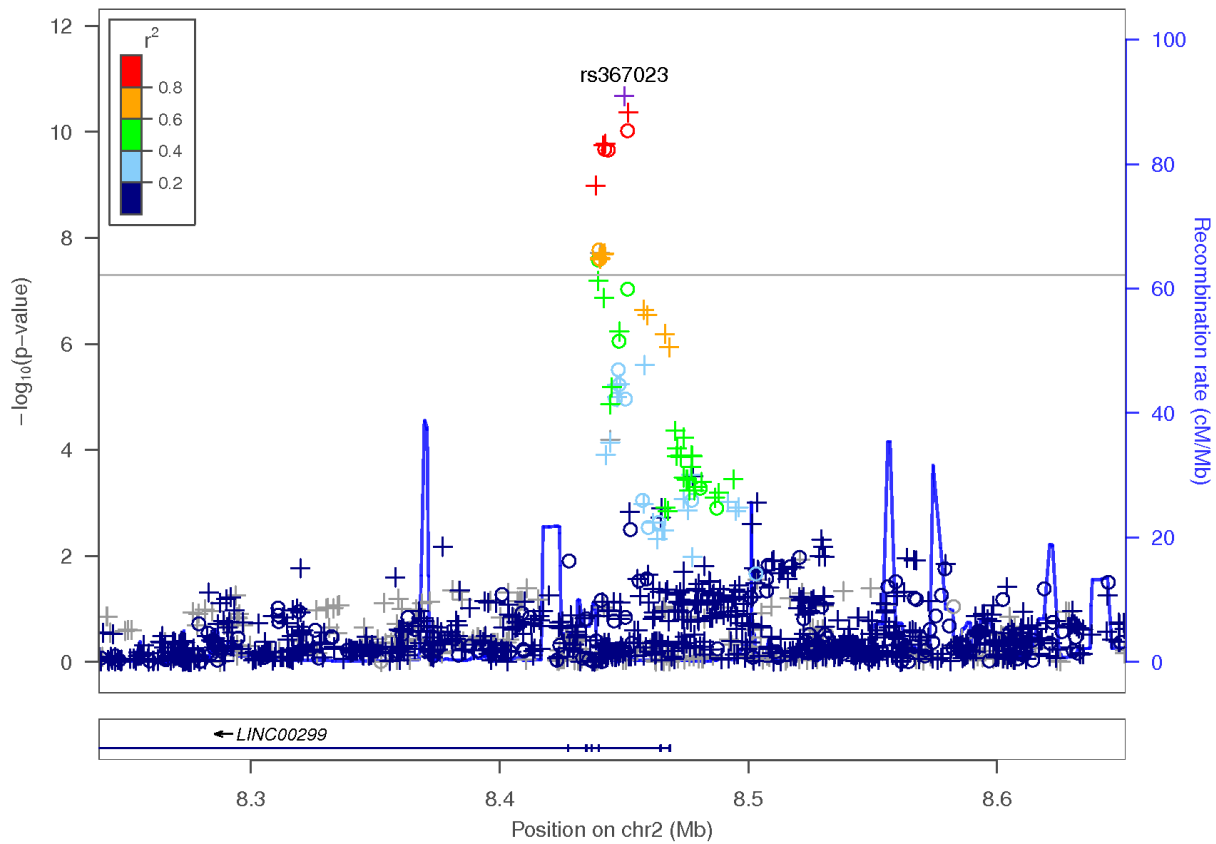

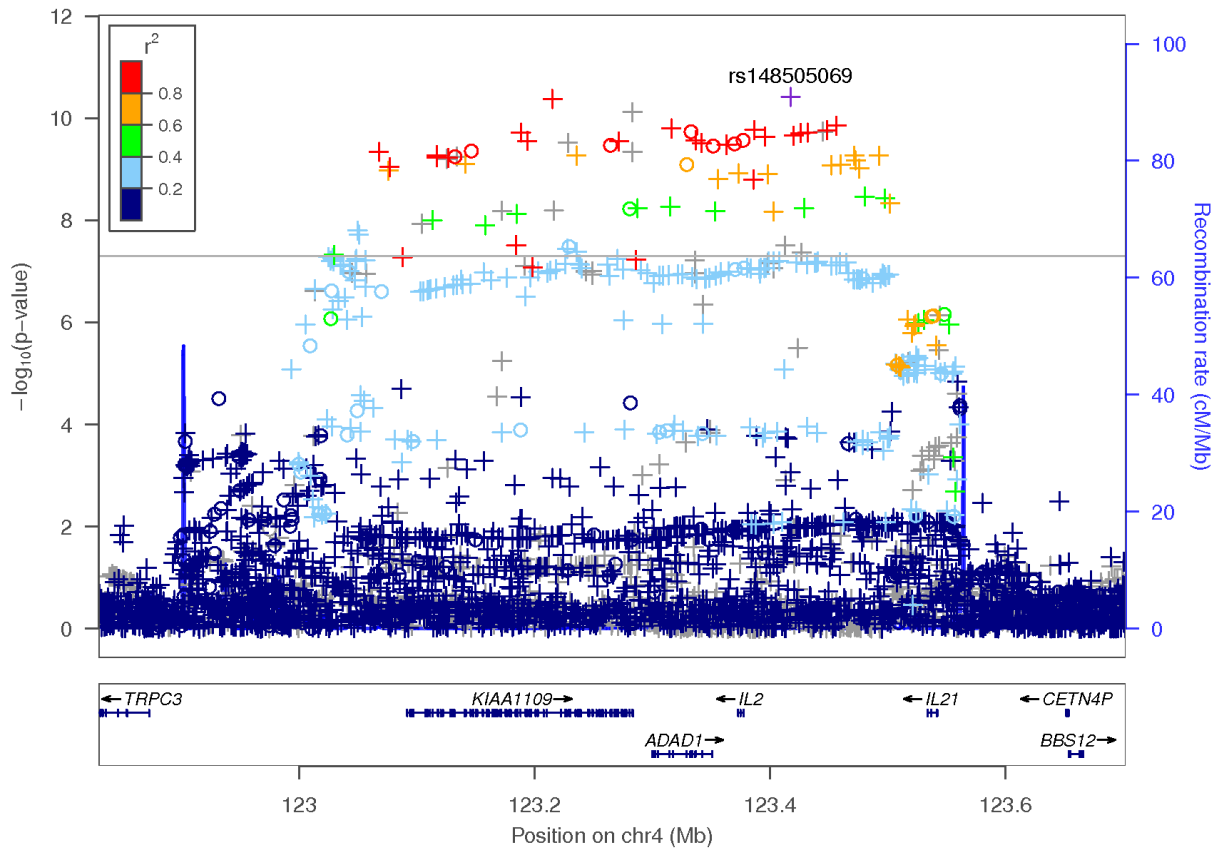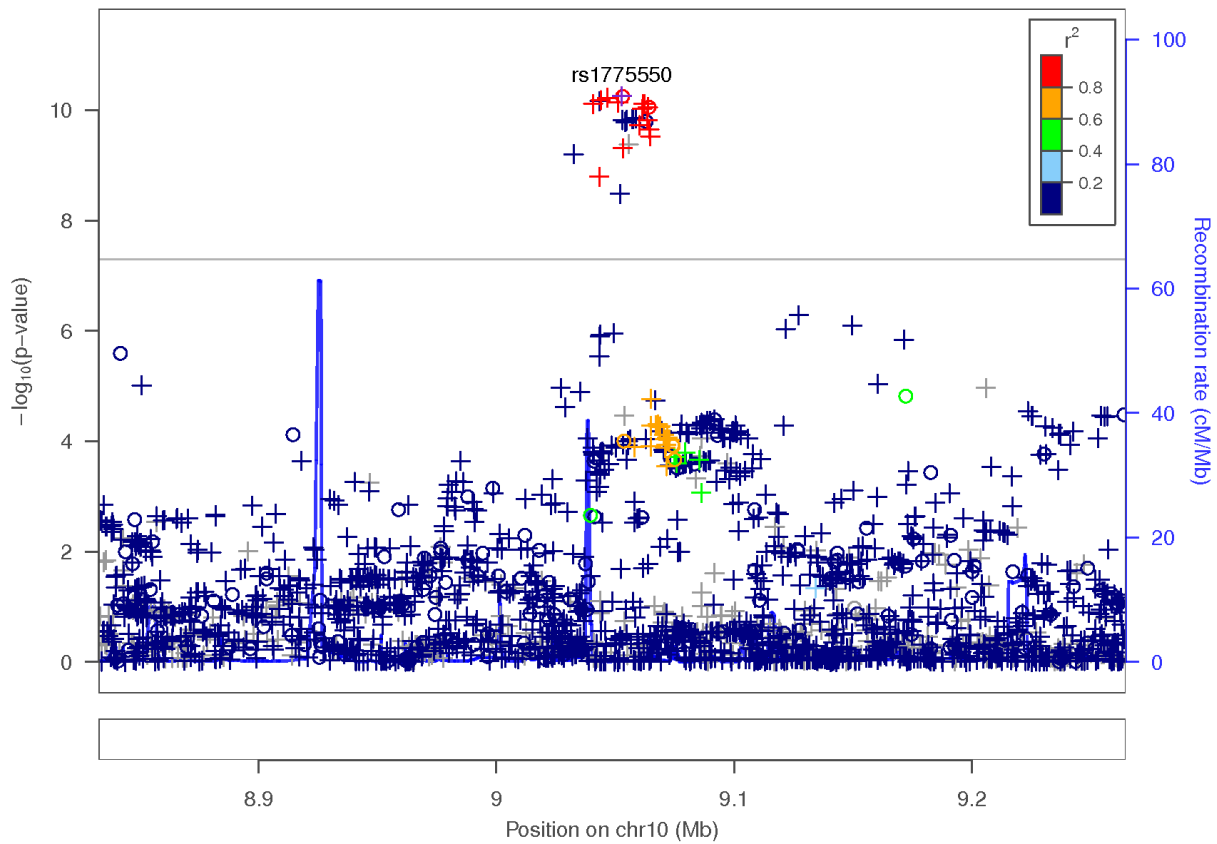

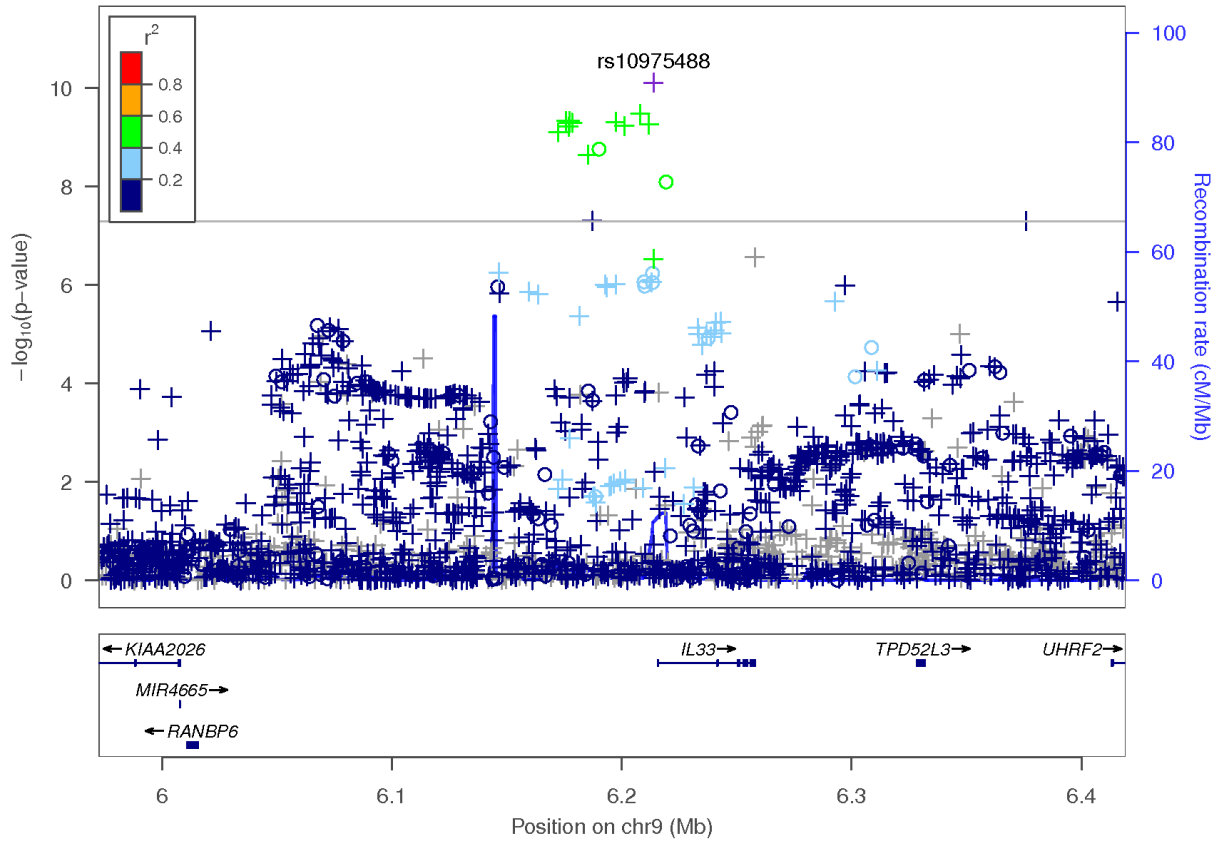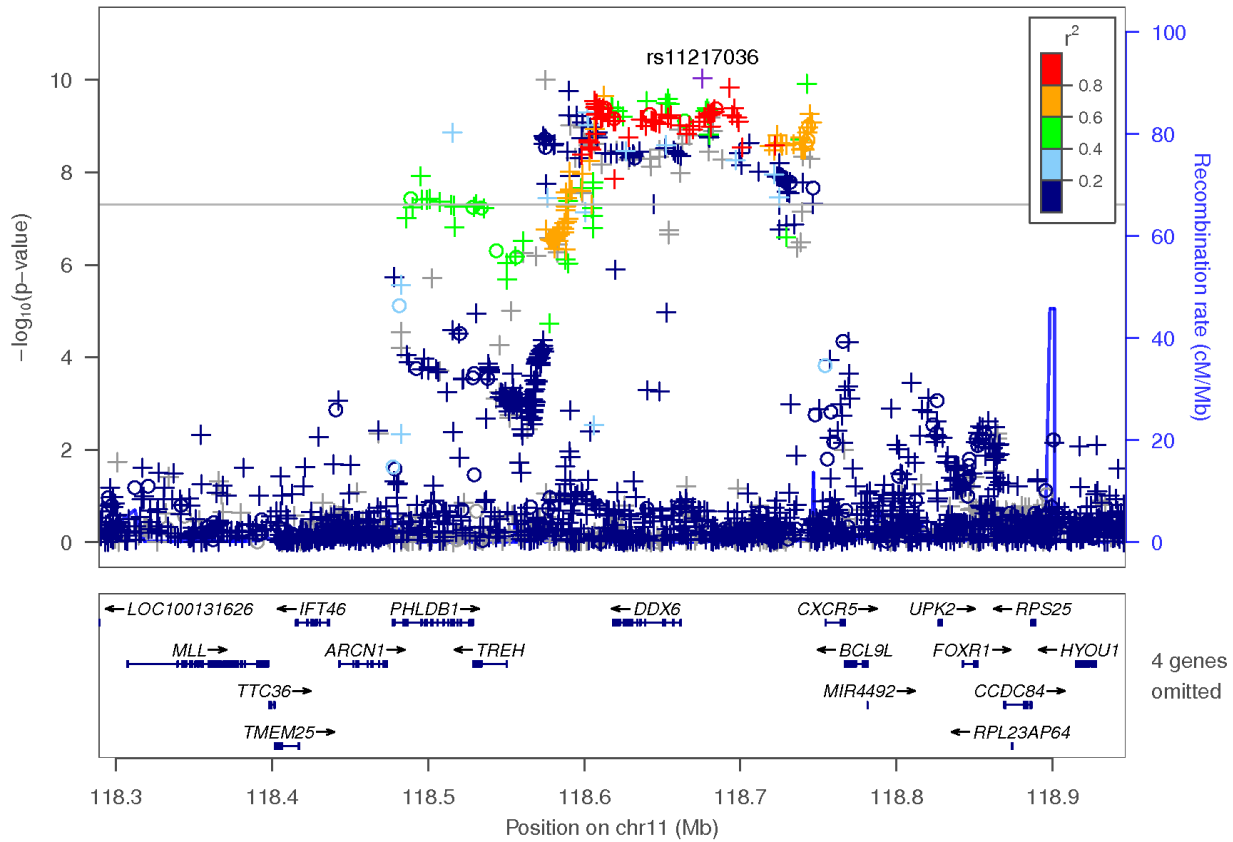

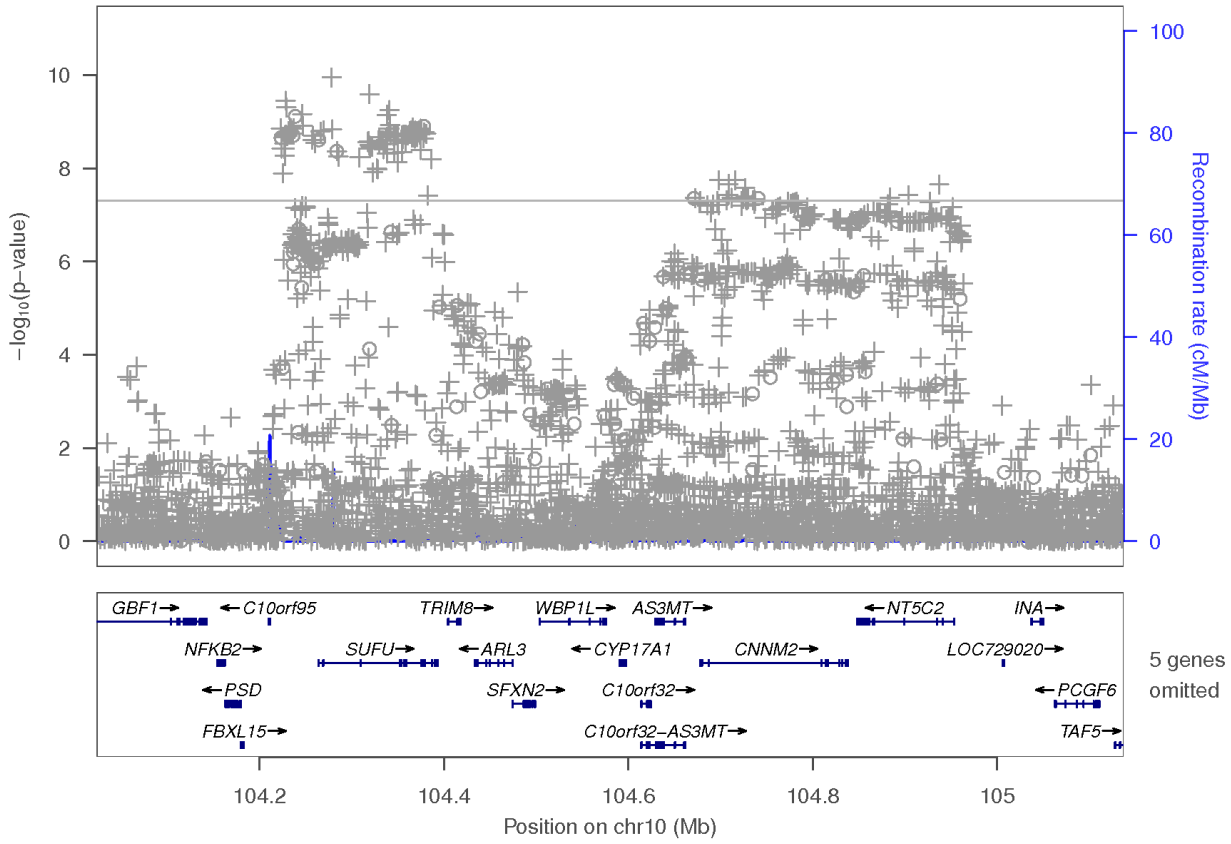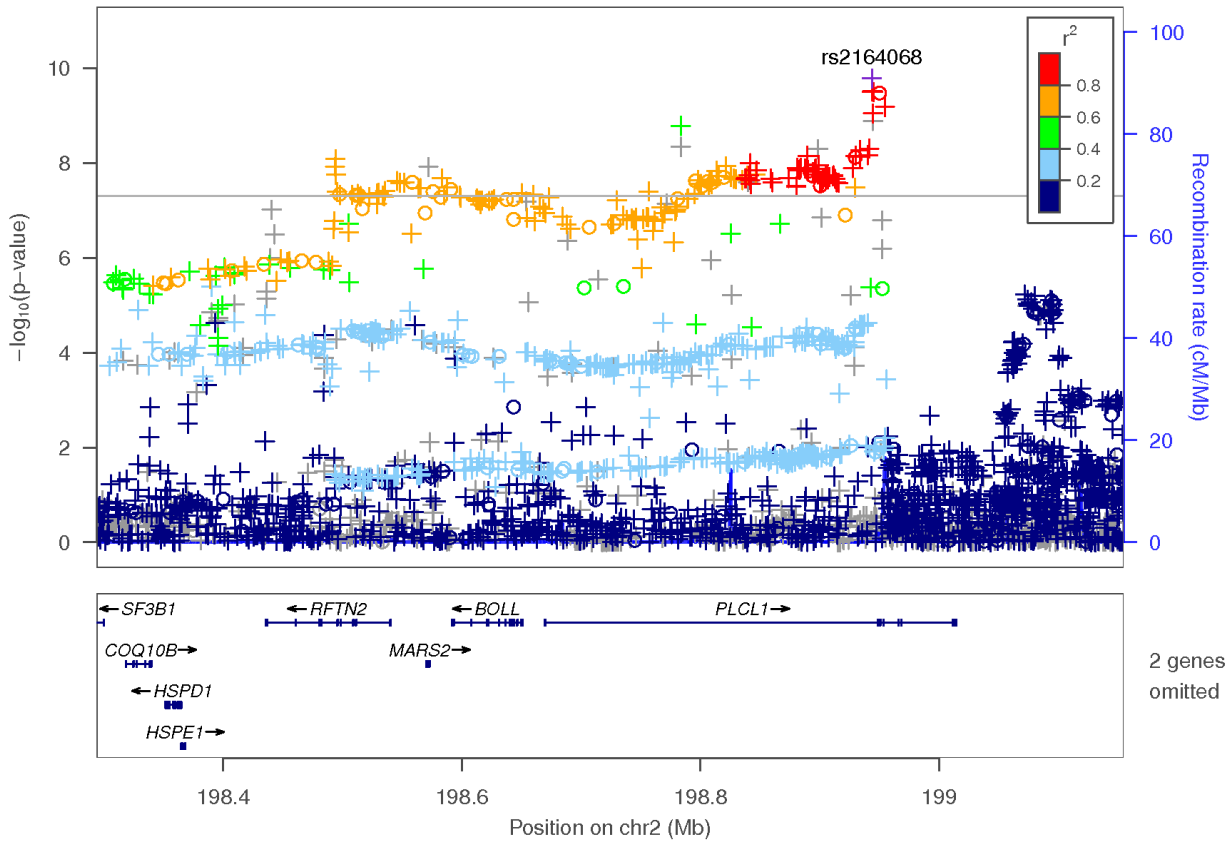



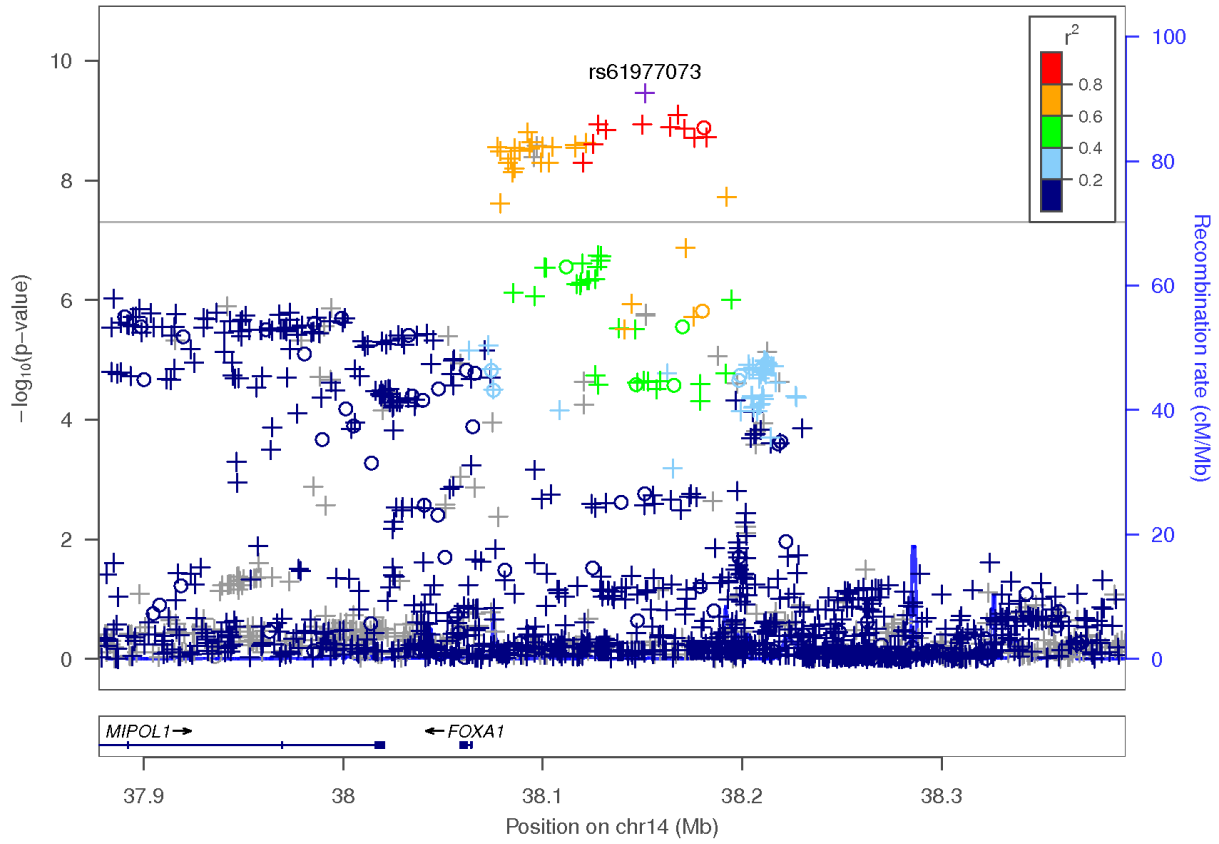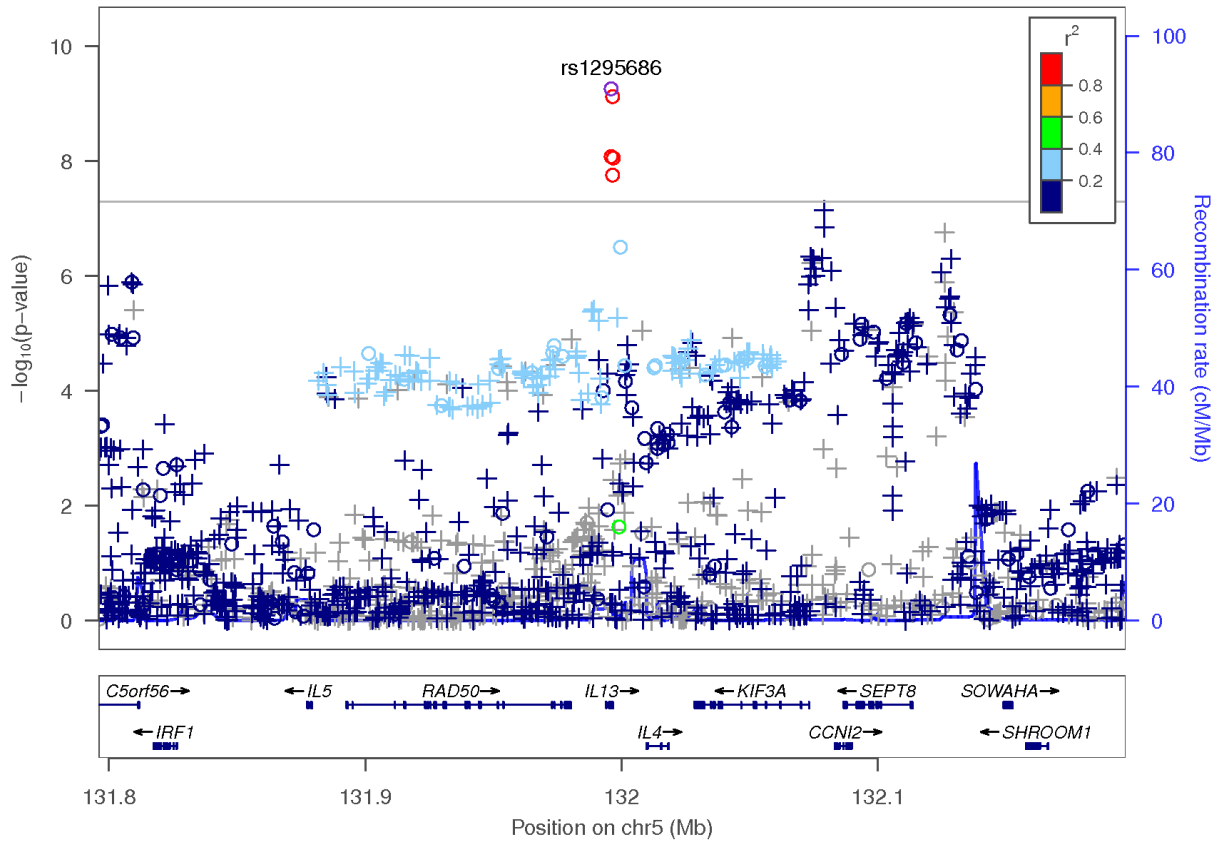

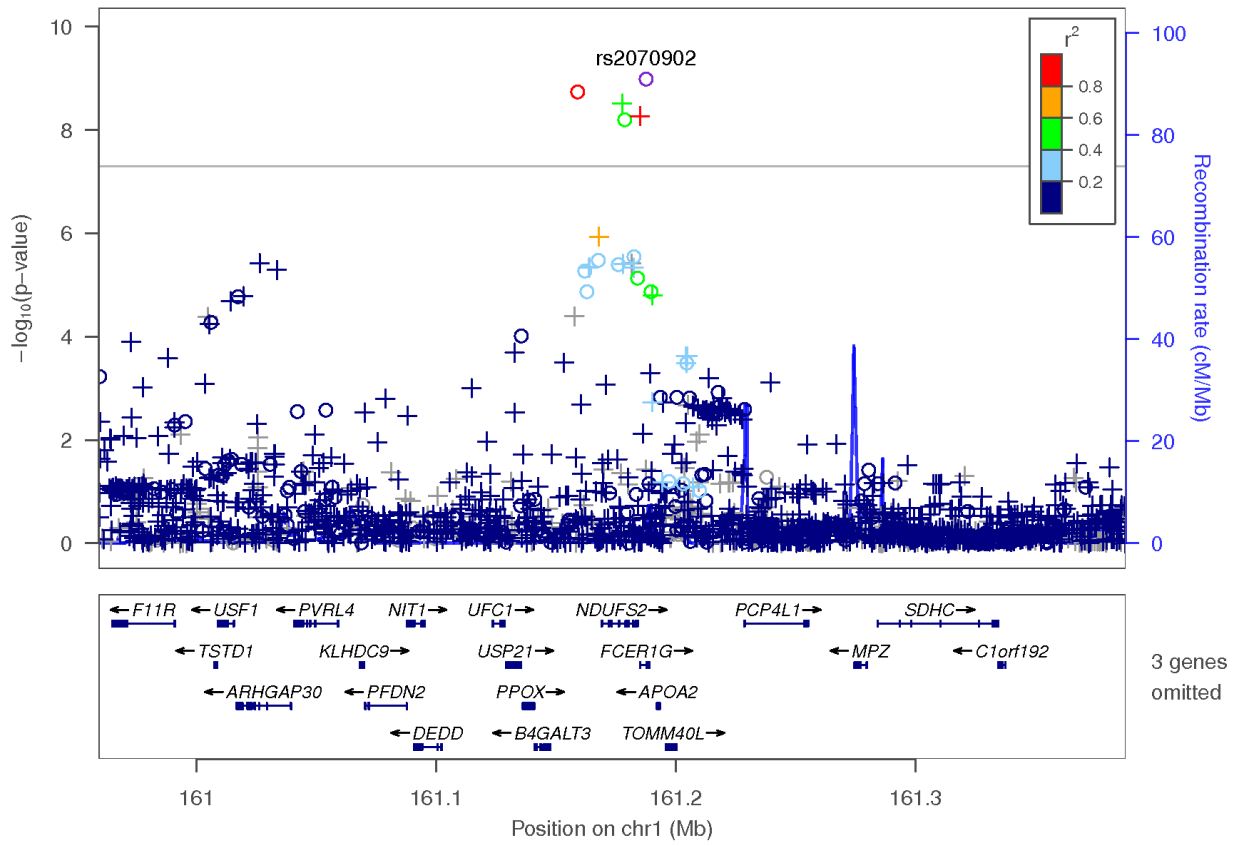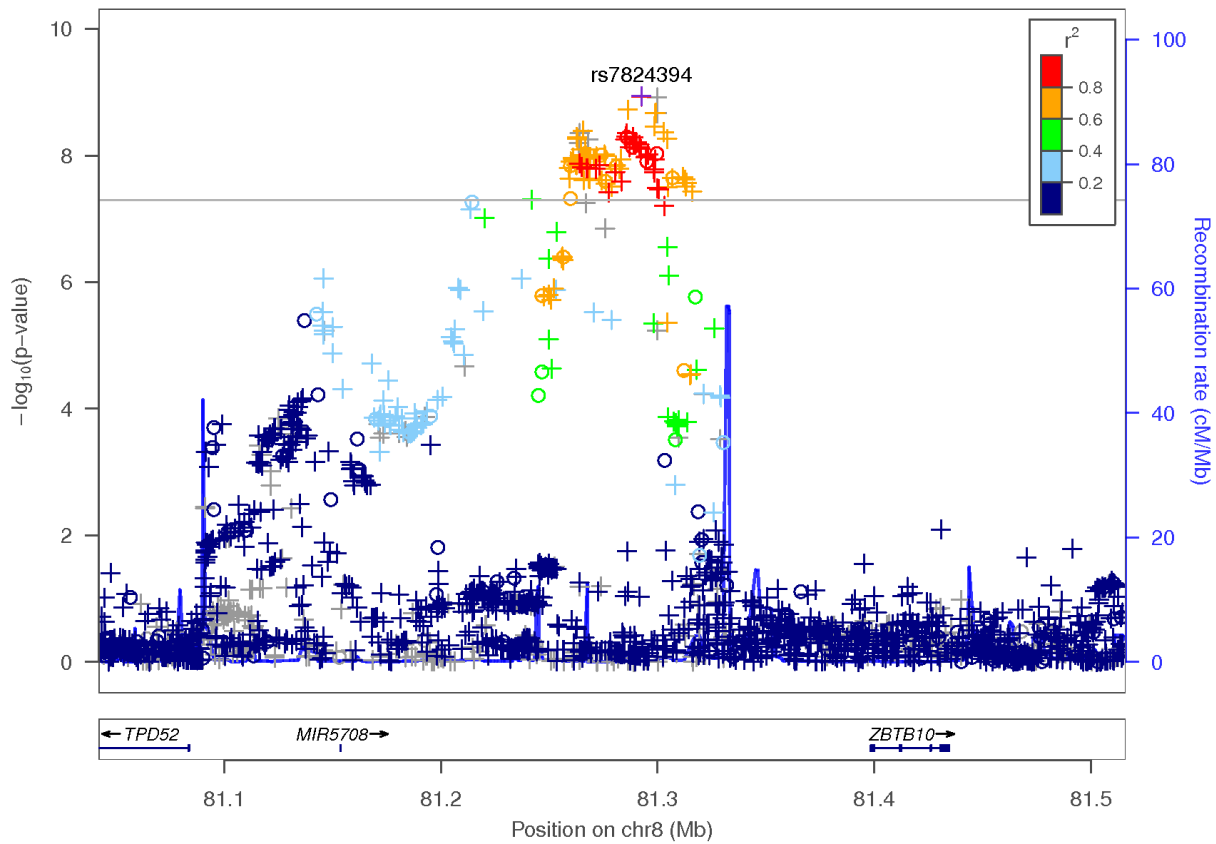

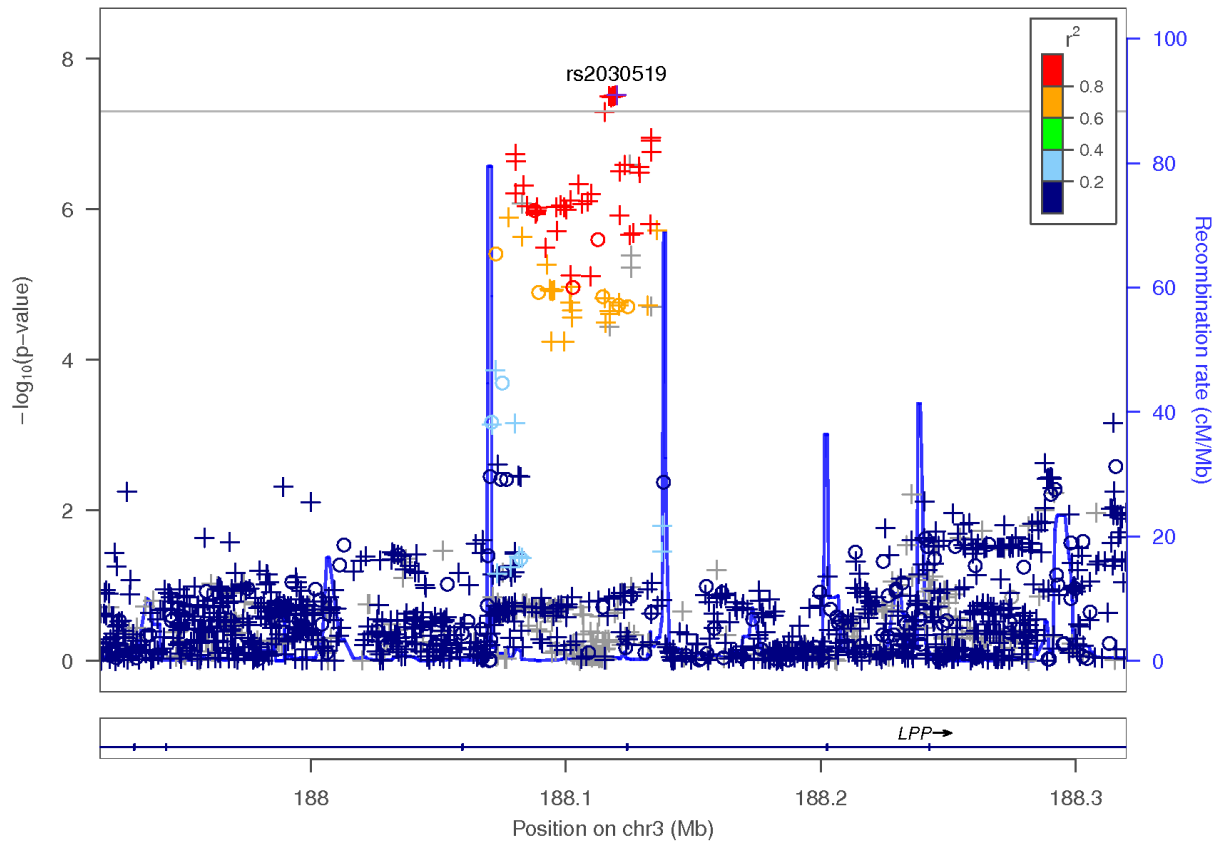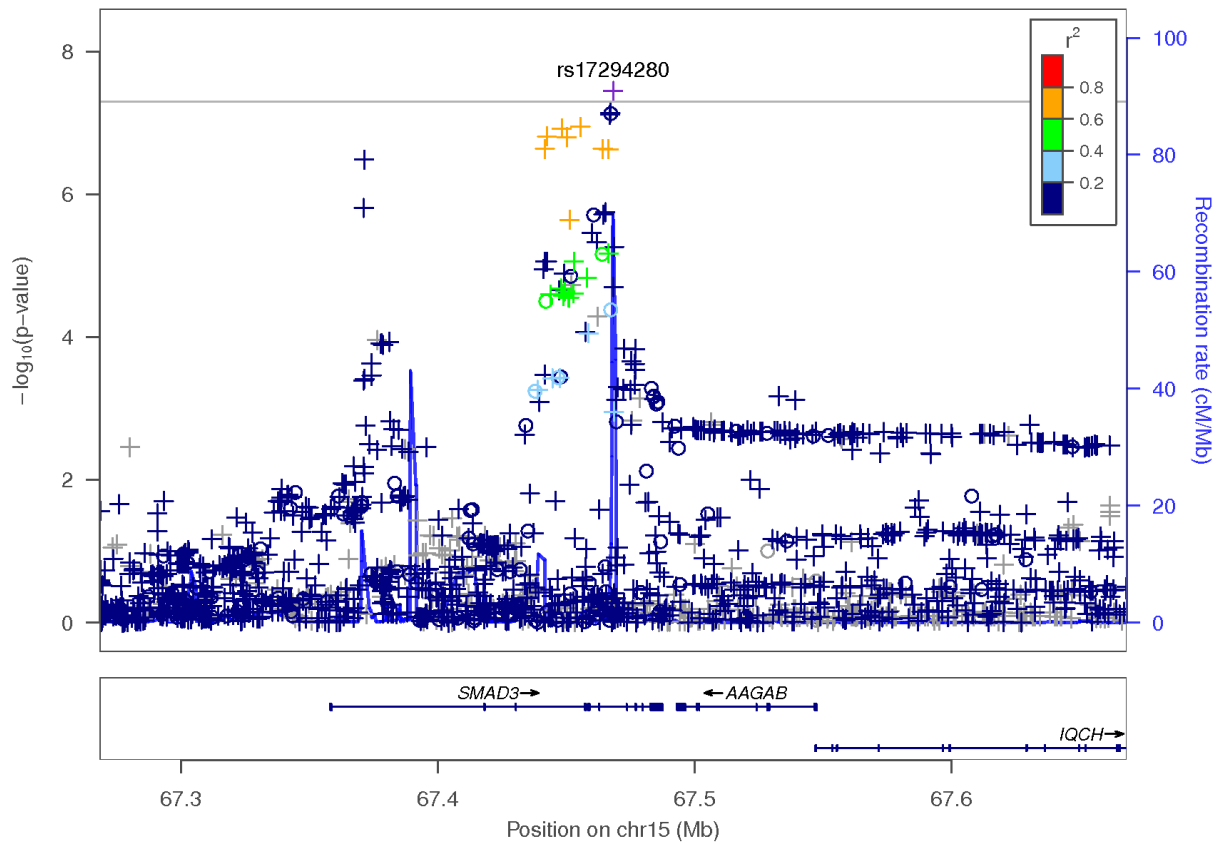

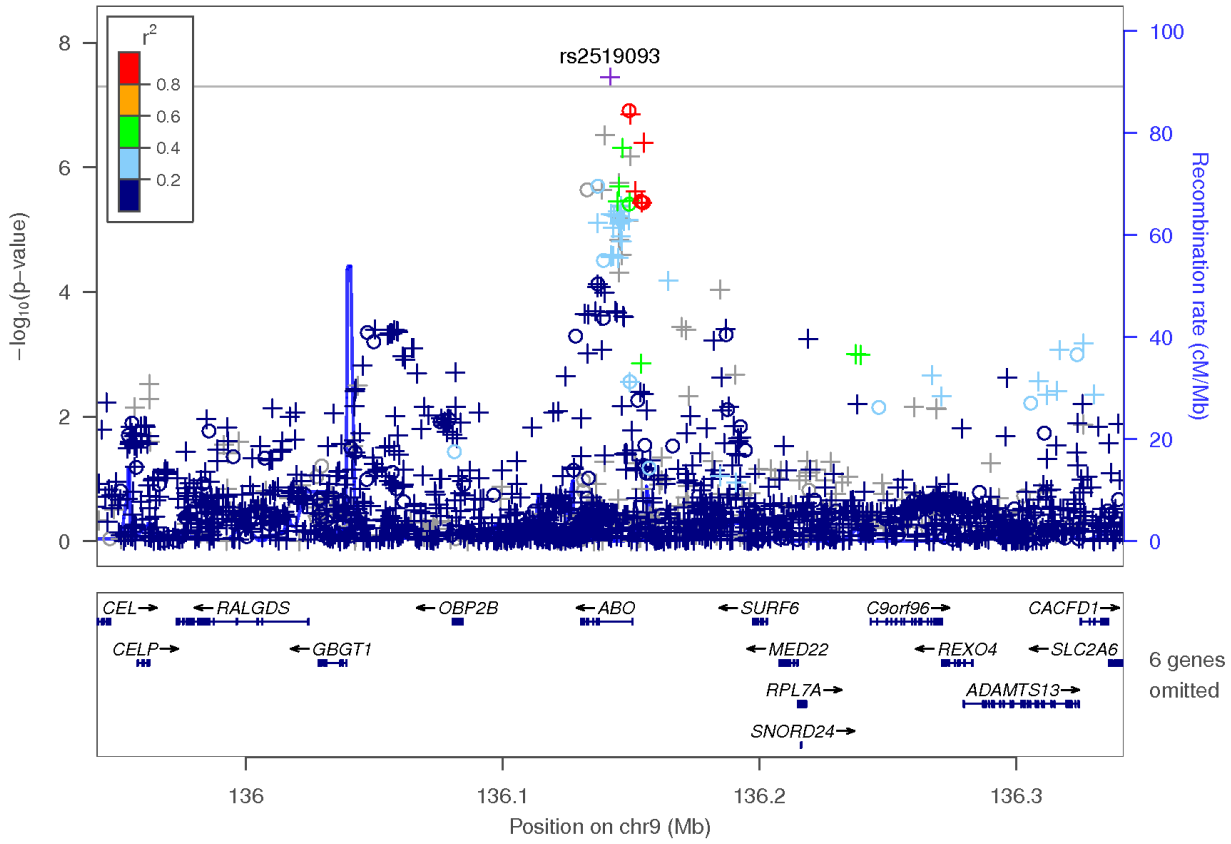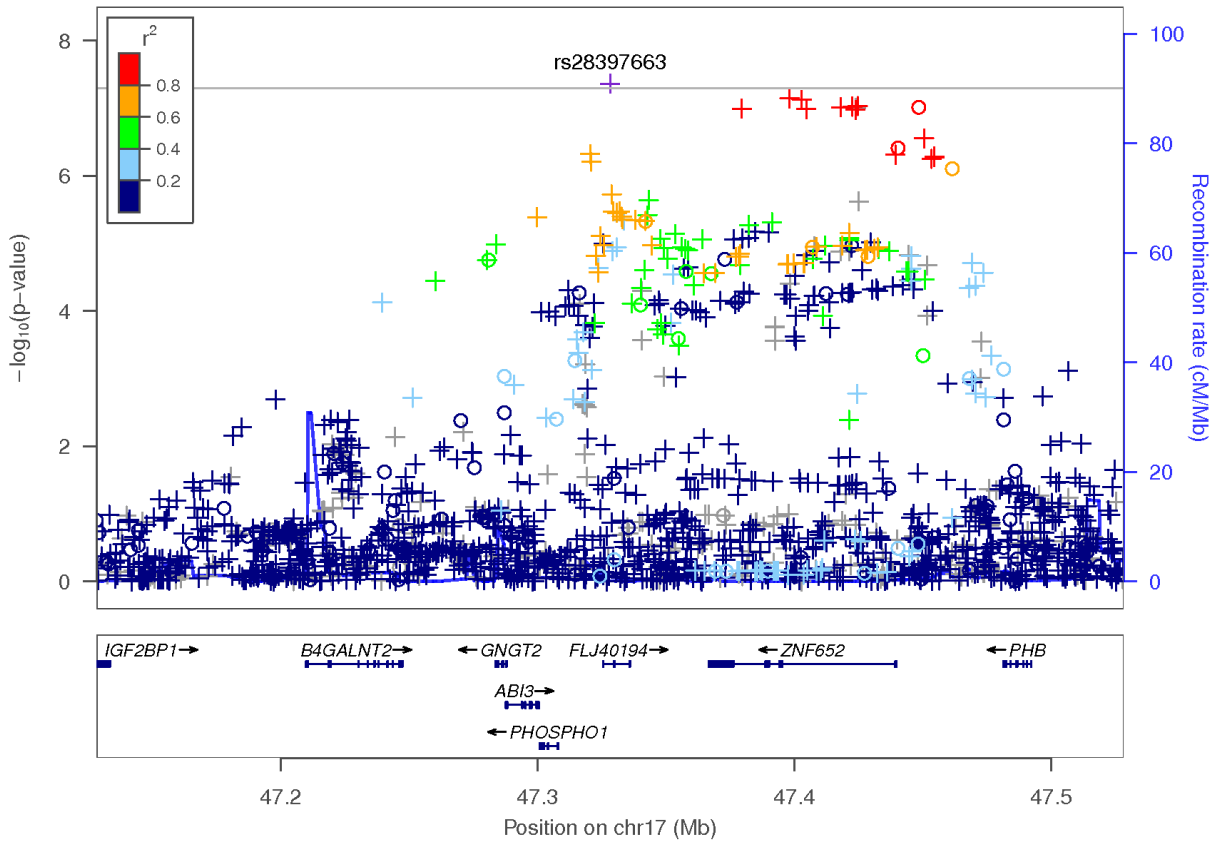

Supplement: NIHMS780506-supplement-5.pdf [file NIHMS780506-supplement-5.pdf]
