# Supplementary material
Source: PubMed Central journal article supplement (PMC5207801)

# Analysis Summary: Any Asthma

## Phenotype Description

The "any asthma" phenotype combines reports of asthma diagnoses from several sources:

- "Your Health Profile"
  - "Have you ever been diagnosed or treated for any of the following conditions?" (Asthma: Yes, No, Don't Know)
- "Your Medical History"
  - "Have you ever been diagnosed by a doctor with any of the following types of *allergies*?" (Asthma: Yes, No, I don't know)
- "Allergies and Asthma" survey
  - "Have you ever had an asthma attack?" (Yes, No, I'm not sure)
- "Asthma Symptoms" survey
  - "Have you ever been diagnosed by a doctor with asthma or bronchial asthma?" (Yes, No, I'm not sure)
- The Roots into the Future intake form
  - "Have you ever been diagnosed or treated for any of the following conditions?" (Asthma: Yes, No, Don't Know)

We merge the yes/no responses from these questions, with inconsistent responses scored as missing: cases have at least one positive response and no negative responses, and controls have at least one negative response and no positive responses.

## Phenotype Statistics

The following table shows demographics of unrelated, European individuals included in the GWAS.

| Phenotype  | Group   | Total  | M     | F     | (0,30] | (30,45] | (45,60] | (60,Inf] |
|------------|---------|--------|-------|-------|--------|---------|---------|----------|
| any_asthma | case    | 28399  | 13045 | 15354 | 4549   | 8791    | 7307    | 7752     |
|            | control | 128843 | 71655 | 57188 | 17452  | 37451   | 34020   | 39920    |

The following table shows the phenotypic distribution across 23andMe genotyping platforms for individuals included in the GWAS.

| Phenotype  | Group   | Total  | v1/v2 | v3    | v4    |
|------------|---------|--------|-------|-------|-------|
| any_asthma | case    | 28399  | 2308  | 20625 | 5466  |
|            | control | 128843 | 12342 | 91597 | 24904 |

## Null Model with Covariates

The following table shows results of fitting a model for the trait based on just the covariates. Principal coordinates have been standardized, so these effect sizes are in units of standard deviations.

|      | Estimate | Std. Error | z value | Pr(> z )               | LRT   | Pr(>Chi)               |
|------|----------|------------|---------|------------------------|-------|------------------------|
| age  | -0.00869 | 0.000406   | -21.4   | $6.3 \times 10^{-102}$ | 463.3 | $9.3 \times 10^{-103}$ |
| sexF | 0.40229  | 0.013243   | 30.4    | $1.1 \times 10^{-202}$ | 927.0 | $1.3 \times 10^{-203}$ |
| pc.0 | -0.01059 | 0.006554   | -1.6    | 0.11                   | 2.6   | 0.11                   |
| pc.1 | -0.15937 | 0.007466   | -21.3   | $4.1 \times 10^{-101}$ | 498.3 | $2.2 \times 10^{-110}$ |
| pc.2 | -0.08912 | 0.006928   | -12.9   | $7.2 \times 10^{-38}$  | 170.6 | $5.5 \times 10^{-39}$  |
| pc.3 | -0.02524 | 0.006722   | -3.8    | 0.00017                | 14.1  | 0.00017                |
| pc.4 | 0.00249  | 0.007164   | 0.3     | 0.73                   | 0.1   | 0.73                   |

## SNP-level QC information

The following table shows results for QC filters on the genotyped data:

|                         | failed | passed  |
|-------------------------|--------|---------|
| no filters              | 0      | 1030430 |
| not V1-only, chrM, chrY | 4790   | 1025640 |
| parent-offspring test   | 2129   | 1023511 |
| MAF > 0%                | 3203   | 1020494 |
| HWE > 1e-20             | 48225  | 972832  |
| gt.rate > 90%           | 30775  | 952826  |
| batch effects           | 28267  | 945446  |

The following table shows results for QC filters on the imputed dosage data:

|                    | failed | passed   |
|--------------------|--------|----------|
| no filters         | 0      | 13733809 |
| MAF > 0%           | 0      | 13733809 |
| imputation quality | 0      | 13733809 |
| batch effects      | 2168   | 13731641 |

The following table shows results for QC filters on the merged association test results:

|                    | passed   | total    |
|--------------------|----------|----------|
| imputed only       | 12833621 | 12833621 |
| both passed        | 898002   | 13731623 |
| genotyped only     | 47444    | 13779067 |
| no test result     | -6301    | 13772766 |
| failed to converge | -24953   | 13747813 |

## Genetic Association Tests

We performed logistic regression assuming an additive model for allelic effects, using the model:

$$any\_asthma \sim age + sex + pc.0 + pc.1 + pc.2 + pc.3 + pc.4 + genotype$$

This genome-wide association analysis includes data from 28399 cases and 128843 controls of European ancestry, filtered to remove close relatives.

The results in this report have been adjusted for a genomic control inflation factor  $\lambda=1.096$ . The equivalent inflation factor for 1000 cases and 1000 controls  $\lambda_{1000}=1.002$ , and for 10000,  $\lambda_{10000}=1.021$ .

## Manhattan Plot

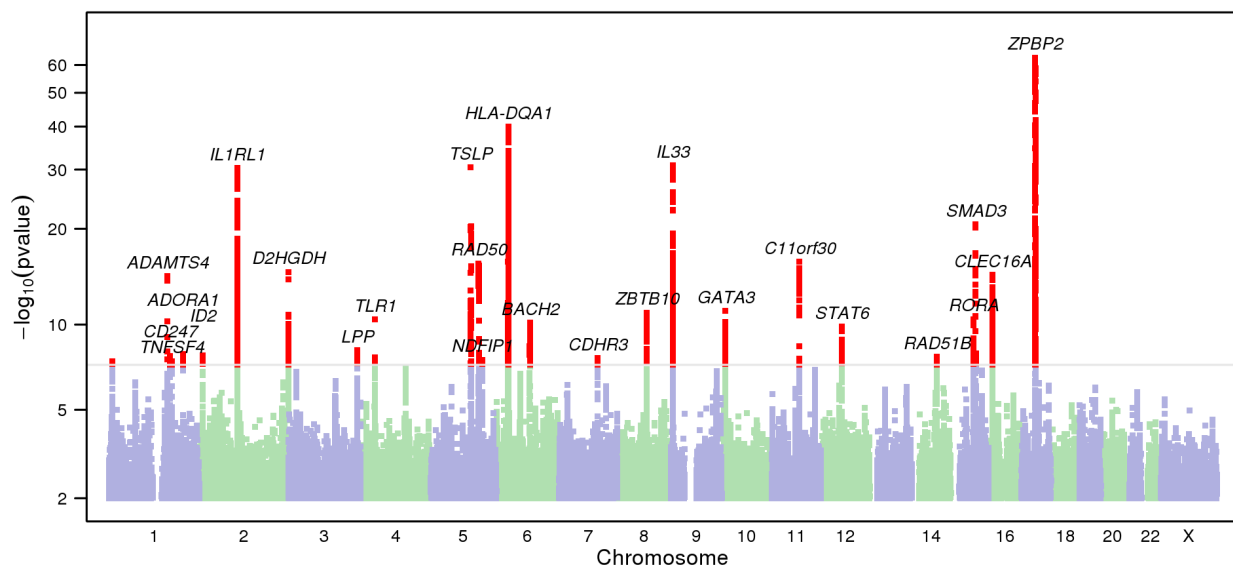

## Q-Q Plot of GWAS Results

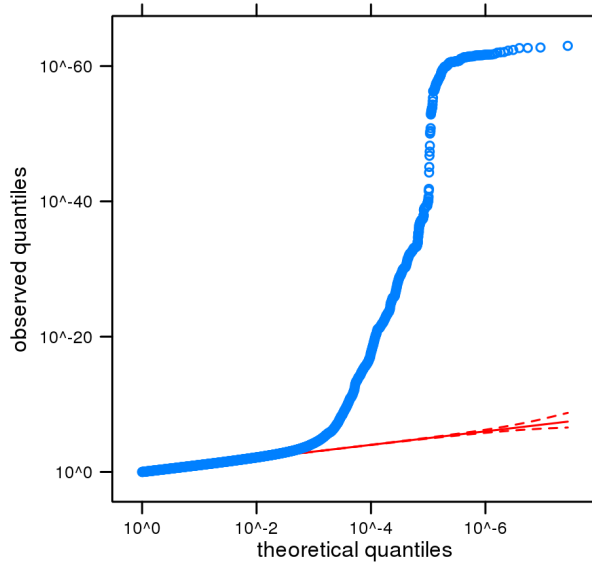

## Index SNPs for Strongest Associations

| cytoband | assay.name  | scaffold | position  | alleles | src | pvalue                | OR    | 95% CI        | gene.context           |
|----------|-------------|----------|-----------|---------|-----|-----------------------|-------|---------------|------------------------|
| 17q12    | rs11655198  | chr17    | 38026169  | C/T     | I   | $1.0 \times 10^{-63}$ | 0.847 | [0.831,0.863] | [ZPBP2]                |
| 6p21.32  | rs3104367   | chr6     | 32603487  | C/T     | I   | $1.0 \times 10^{-40}$ | 0.872 | [0.855,0.890] | HLA-DRB5---[]-HLA-DQA1 |
| 9p24.1   | rs144829310 | chr9     | 6208030   | G/T     | I   | $1.3 \times 10^{-31}$ | 1.165 | [1.136,1.195] | RANBP6---[]-IL33       |
| 5q22.1   | rs1837253   | chr5     | 110401872 | C/T     | I   | $3.3 \times 10^{-31}$ | 0.876 | [0.856,0.896] | SLC25A46---[]-TSLP     |
| 2q12.1   | rs202011557 | chr2     | 102913642 | D/I     | I   | $5.1 \times 10^{-31}$ | 0.842 | [0.818,0.868] | IL1RL2--[]--IL1RL1     |
| 15q22.33 | rs56375023  | chr15    | 67448363  | A/G     | I   | $2.4 \times 10^{-21}$ | 0.897 | [0.877,0.917] | [SMAD3]                |
| 11q13.5  | rs7936323   | chr11    | 76293758  | A/G     | I   | $1.4 \times 10^{-16}$ | 0.922 | [0.905,0.940] | C11orf30--[]--LRRC32   |
| 6p21.33  | rs2428494   | chr6     | 31322197  | A/T     | I   | $1.4 \times 10^{-16}$ | 0.920 | [0.902,0.939] | HLA-C-[]--MICA         |
| 5q31.1   | rs2244012   | chr5     | 131901225 | A/G     | I   | $2.1 \times 10^{-16}$ | 1.102 | [1.077,1.128] | [RAD50]                |
| 2q37.3   | rs34290285  | chr2     | 242698640 | A/G     | I   | $1.8 \times 10^{-15}$ | 1.107 | [1.079,1.135] | [D2HGDH]               |
| 16p13.13 | rs7203459   | chr16    | 11230703  | C/T     | I   | $3.5 \times 10^{-15}$ | 1.092 | [1.068,1.117] | [CLEC16A]              |
| 1q23.3   | rs4233366   | chr1     | 161159147 | C/T     | I   | $4.8 \times 10^{-15}$ | 1.090 | [1.067,1.114] | B4GALT3--[]ADAMTS4     |
| 10p14    | rs12413578  | chr10    | 9049253   | C/T     | I   | $8.1 \times 10^{-12}$ | 0.891 | [0.862,0.921] | GATA3---[]             |
| 8q21.13  | rs10957978  | chr8     | 81285139  | G/T     | I   | $1.1 \times 10^{-11}$ | 0.934 | [0.915,0.952] | TPD52---[]---ZBTB10    |
| 15q22.2  | rs10519068  | chr15    | 61068704  | A/G     | I   | $3.8 \times 10^{-11}$ | 1.100 | [1.069,1.132] | RORA---[]              |
| 4p14     | rs5743618   | chr4     | 38798648  | A/C     | I   | $3.9 \times 10^{-11}$ | 1.082 | [1.057,1.107] | [TLR1]                 |
| 6q15     | rs58521088  | chr6     | 90985198  | A/T     | I   | $7.1 \times 10^{-11}$ | 0.934 | [0.915,0.954] | [BACH2]                |
| 12q13.3  | rs3001426   | chr12    | 57509055  | C/T     | I   | $1.4 \times 10^{-10}$ | 0.938 | [0.919,0.956] | STAT6-[]--LRP1         |
| 3q28     | rs73196739  | chr3     | 188402471 | C/T     | I   | $6.5 \times 10^{-9}$  | 0.922 | [0.897,0.948] | [LPP]                  |
| 1q32.1   | rs6683383   | chr1     | 203100504 | A/T     | I   | $1.1 \times 10^{-8}$  | 1.062 | [1.040,1.084] | [ADORA1]               |
| 2p25.1   | rs13412757  | chr2     | 8458080   | A/G     | I   | $1.3 \times 10^{-8}$  | 1.062 | [1.040,1.084] | []---ID2               |
| 1q24.2   | rs1723018   | chr1     | 167433420 | A/G     | I   | $1.4 \times 10^{-8}$  | 0.945 | [0.926,0.963] | [CD247]                |
| 14q24.1  | rs3784099   | chr14    | 68749927  | A/G     | I   | $1.6 \times 10^{-8}$  | 0.942 | [0.922,0.961] | [RAD51B]               |
| 7q22.3   | rs6959584   | chr7     | 105676505 | C/T     | I   | $2.0 \times 10^{-8}$  | 1.086 | [1.055,1.117] | [CDHR3]                |
| 5q31.3   | rs200634877 | chr5     | 141529761 | D/I     | I   | $2.5 \times 10^{-8}$  | 0.940 | [0.919,0.961] | [NDFIP1]               |
| 1q25.1   | rs6691738   | chr1     | 173152036 | G/T     | I   | $2.9 \times 10^{-8}$  | 0.943 | [0.923,0.963] | TNFSF18---[]TNFSF4     |
| 1p36.22  | rs662064    | chr1     | 10557251  | C/T     | I   | $3.2 \times 10^{-8}$  | 0.942 | [0.922,0.962] | [PEX14]                |

## Quality Statistics for Index SNPs

| assay.name  | is.v2 | is.v3 | is.v4 | gt.rate | hw.p.value            | p.date               | freq.b | avg.rsqr | min.rsqr | p.batch               | dose.b | qc.mask |
|-------------|-------|-------|-------|---------|-----------------------|----------------------|--------|----------|----------|-----------------------|--------|---------|
| rs11655198  | FALSE | FALSE | FALSE |         |                       |                      |        | 0.9882   | 0.9858   | 0.10                  | 0.4874 | v2v3v4  |
| rs3104367   | FALSE | FALSE | FALSE |         |                       |                      |        | 0.9432   | 0.9214   | 0.023                 | 0.4113 | v2v3v4  |
| rs144829310 | FALSE | FALSE | FALSE |         |                       |                      |        | 0.9945   | 0.9919   | 0.46                  | 0.1610 | v2v3v4  |
| rs1837253   | TRUE  | TRUE  | TRUE  | 0.9991  | 0.63                  | 0.51                 | 0.2628 | 0.9707   | 0.9576   | 0.27                  | 0.2615 | v2v3v4  |
| rs202011557 | FALSE | FALSE | FALSE |         |                       |                      |        | 0.9517   | 0.9473   | 0.040                 | 0.1419 | v2v3v4  |
| rs56375023  | FALSE | FALSE | FALSE |         |                       |                      |        | 0.9885   | 0.9784   | 0.42                  | 0.7652 | v2v3v4  |
| rs7936323   | FALSE | FALSE | FALSE |         |                       |                      |        | 0.9923   | 0.9866   | 1.0                   | 0.5171 | v2v3v4  |
| rs2428494   | FALSE | FALSE | FALSE |         |                       |                      |        | 0.9727   | 0.9451   | 0.0063                | 0.5793 | v2v3v4  |
| rs2244012   | TRUE  | TRUE  | TRUE  | 0.9998  | 0.33                  | 0.065                | 0.2144 | 0.9998   | 0.9995   | 0.091                 | 0.2147 | v2v3v4  |
| rs34290285  | FALSE | FALSE | FALSE |         |                       |                      |        | 0.7736   | 0.5233   | $2.4 \times 10^{-5}$  | 0.7371 | v2v3v4  |
| rs7203459   | FALSE | TRUE  | FALSE | 0.9836  | 0.36                  | $1.5 \times 10^{-6}$ | 0.7316 | 0.9966   | 0.9848   | 0.60                  | 0.7354 | v2v3v4  |
| rs4233366   | TRUE  | TRUE  | TRUE  | 0.9996  | 0.83                  | 0.51                 | 0.2594 | 0.9998   | 0.9995   | 0.39                  | 0.2604 | v2v3v4  |
| rs12413578  | FALSE | FALSE | FALSE |         |                       |                      |        | 0.8977   | 0.8389   | 0.021                 | 0.1096 | v2v3v4  |
| rs10957978  | FALSE | FALSE | FALSE |         |                       |                      |        | 0.9981   | 0.9968   | 0.11                  | 0.6373 | v2v3v4  |
| rs10519068  | TRUE  | TRUE  | FALSE | 0.4145  | $4.7 \times 10^{-28}$ | $1.8 \times 10^{-8}$ | 0.8846 | 0.9960   | 0.9918   | 0.13                  | 0.8618 | v2v3v4  |
| rs5743618   | FALSE | FALSE | TRUE  | 0.9963  | 0.0                   | 0.81                 | 0.4544 | 0.9073   | 0.8990   | $5.4 \times 10^{-31}$ | 0.7200 | v2v3v4  |
| rs58521088  | FALSE | FALSE | FALSE |         |                       |                      |        | 0.9760   | 0.9708   | 0.33                  | 0.3480 | v2v3v4  |
| rs3001426   | FALSE | FALSE | FALSE |         |                       |                      |        | 0.9727   | 0.9631   | 0.0010                | 0.5780 | v2v3v4  |

|             |       |       |       |        |         |      |        |  |        |        |                       |        |        |
|-------------|-------|-------|-------|--------|---------|------|--------|--|--------|--------|-----------------------|--------|--------|
| rs73196739  | FALSE | FALSE | FALSE |        |         |      |        |  | 0.9638 | 0.9481 | 0.18                  | 0.1537 | v2v3v4 |
| rs6683383   | FALSE | FALSE | FALSE |        |         |      |        |  | 0.9968 | 0.9816 | 0.044                 | 0.6762 | v2v3v4 |
| rs13412757  | FALSE | FALSE | FALSE |        |         |      |        |  | 0.9914 | 0.9700 | 0.0061                | 0.6737 | v2v3v4 |
| rs1723018   | FALSE | FALSE | FALSE |        |         |      |        |  | 0.9931 | 0.9816 | 0.12                  | 0.3964 | v2v3v4 |
| rs3784099   | FALSE | TRUE  | TRUE  | 0.9998 | 0.00045 | 0.98 | 0.7029 |  | 0.9984 | 0.9872 | 0.044                 | 0.7008 | v2v3v4 |
| rs6959584   | FALSE | FALSE | FALSE |        |         |      |        |  | 0.9514 | 0.8785 | 1.1×10 <sup>-22</sup> | 0.1332 | v2v3v4 |
| rs200634877 | FALSE | FALSE | FALSE |        |         |      |        |  | 0.8496 | 0.8303 | 0.53                  | 0.3501 | v2v3v4 |
| rs6691738   | FALSE | FALSE | FALSE |        |         |      |        |  | 0.9813 | 0.9440 | 7.6×10 <sup>-6</sup>  | 0.6860 | v2v3v4 |
| rs662064    | FALSE | FALSE | FALSE |        |         |      |        |  | 0.9771 | 0.9743 | 0.31                  | 0.2926 | v2v3v4 |

## SNP Statistics in the GWAS Sample

| assay.name  | AA.0  | AB.0  | BB.0  | im.num.0 | dose.b.0 | AA.1  | AB.1  | BB.1  | im.num.1 | dose.b.1 |
|-------------|-------|-------|-------|----------|----------|-------|-------|-------|----------|----------|
| rs11655198  |       |       |       | 128843   | 0.4958   |       |       |       | 28399    | 0.4562   |
| rs3104367   |       |       |       | 128843   | 0.4186   |       |       |       | 28399    | 0.3866   |
| rs144829310 |       |       |       | 128843   | 0.1562   |       |       |       | 28399    | 0.1782   |
| rs1837253   | 68978 | 50450 | 9265  | 128843   | 0.2664   | 16278 | 10411 | 1683  | 28399    | 0.2418   |
| rs202011557 |       |       |       | 128843   | 0.1454   |       |       |       | 28399    | 0.1252   |
| rs56375023  |       |       |       | 128843   | 0.7679   |       |       |       | 28399    | 0.7486   |
| rs7936323   |       |       |       | 128843   | 0.5216   |       |       |       | 28399    | 0.5004   |
| rs2428494   |       |       |       | 128843   | 0.5797   |       |       |       | 28399    | 0.5577   |
| rs2244012   | 79996 | 42887 | 5922  | 128843   | 0.2124   | 17014 | 9970  | 1409  | 28399    | 0.2252   |
| rs34290285  |       |       |       | 128843   | 0.7346   |       |       |       | 28399    | 0.7508   |
| rs7203459   | 6639  | 35838 | 48086 | 128843   | 0.7324   | 1357  | 7706  | 11288 | 28399    | 0.7489   |
| rs4233366   | 71268 | 49016 | 8517  | 128843   | 0.2566   | 14946 | 11295 | 2151  | 28399    | 0.2749   |
| rs12413578  |       |       |       | 128843   | 0.1097   |       |       |       | 28399    | 0.1007   |
| rs10957978  |       |       |       | 128843   | 0.6408   |       |       |       | 28399    | 0.6245   |
| rs10519068  | 1201  | 13646 | 53463 | 128843   | 0.8606   | 191   | 2649  | 11210 | 28399    | 0.8727   |
| rs743618    | 2208  | 22587 | 0     | 128843   | 0.7277   | 452   | 4994  | 0     | 28399    | 0.7431   |
| rs58521088  |       |       |       | 128843   | 0.3523   |       |       |       | 28399    | 0.3386   |
| rs3001426   |       |       |       | 128843   | 0.5772   |       |       |       | 28399    | 0.5614   |
| rs73196739  |       |       |       | 128843   | 0.1563   |       |       |       | 28399    | 0.1456   |
| rs6683383   |       |       |       | 128843   | 0.6737   |       |       |       | 28399    | 0.6866   |
| rs13412757  |       |       |       | 128843   | 0.6681   |       |       |       | 28399    | 0.6816   |
| rs1723018   |       |       |       | 128843   | 0.3974   |       |       |       | 28399    | 0.3856   |
| rs3784099   | 10101 | 48233 | 58138 | 128843   | 0.7051   | 2531  | 10904 | 12649 | 28399    | 0.6926   |
| rs6959584   |       |       |       | 128843   | 0.1305   |       |       |       | 28399    | 0.1386   |
| rs200634877 |       |       |       | 128843   | 0.3531   |       |       |       | 28399    | 0.3422   |
| rs6691738   |       |       |       | 128843   | 0.6907   |       |       |       | 28399    | 0.6798   |
| rs662064    |       |       |       | 128843   | 0.2952   |       |       |       | 28399    | 0.2844   |

## Annotations from NHGRI GWAS Catalog

The following table shows, for each index SNP, all entries in the NHGRI GWAS Catalog that are within 500kb and in at least moderate linkage disequilibrium ( $r^2 > 0.5$ ).

| region  | position  | our.name    | our.pval              | dist    | rsqr  | assay.name | pvalue                 | pubmed.id | trait                                               | genes                          |
|---------|-----------|-------------|-----------------------|---------|-------|------------|------------------------|-----------|-----------------------------------------------------|--------------------------------|
| 17q12   | 38026169  | rs11655198  | 1.0×10 <sup>-63</sup> | -113792 | 0.740 | rs12946510 | 4.0×10 <sup>-38</sup>  | 23128233  | Inflammatory bowel disease                          | IKZF3,ZPBP2,GSDMB,ORMDL3,GSDMA |
| 17q12   | 38026169  | rs11655198  | 1.0×10 <sup>-63</sup> | -103910 | 0.797 | rs907092   | 8.0×10 <sup>-6</sup>   | 19458352  | Primary biliary cirrhosis                           | IKZF3                          |
| 17q12   | 38026169  | rs11655198  | 1.0×10 <sup>-63</sup> | -49700  | 0.922 | rs9303277  | 7.0×10 <sup>-6</sup>   | 23740937  | Systemic lupus erythematosus and Systemic sclerosis | IKZF3                          |
| 17q12   | 38026169  | rs11655198  | 1.0×10 <sup>-63</sup> | -49700  | 0.922 | rs9303277  | 4.0×10 <sup>-9</sup>   | 23000144  | Primary biliary cirrhosis                           | IKZF3, ZPBP2, ...              |
| 17q12   | 38026169  | rs11655198  | 1.0×10 <sup>-63</sup> | -49700  | 0.922 | rs9303277  | 2.0×10 <sup>-9</sup>   | 20639880  | Primary biliary cirrhosis                           | IKZF3,ZPBP2,GSDMB,ORMDL3       |
| 17q12   | 38026169  | rs11655198  | 1.0×10 <sup>-63</sup> | 14594   | 0.842 | rs2872507  | 2.0×10 <sup>-6</sup>   | 21829393  | Type 1 diabetes autoantibodies                      | ORMDL3                         |
| 17q12   | 38026169  | rs11655198  | 1.0×10 <sup>-63</sup> | 14594   | 0.842 | rs2872507  | 5.0×10 <sup>-11</sup>  | 21297633  | Ulcerative colitis                                  | IKZF3, ORMDL3, ...             |
| 17q12   | 38026169  | rs11655198  | 1.0×10 <sup>-63</sup> | 14594   | 0.842 | rs2872507  | 2.0×10 <sup>-9</sup>   | 21102463  | Crohn's disease                                     | GSDML,ZPBP2,ORMDL3,IKZF3       |
| 17q12   | 38026169  | rs11655198  | 1.0×10 <sup>-63</sup> | 14594   | 0.842 | rs2872507  | 9.0×10 <sup>-7</sup>   | 20453842  | Rheumatoid arthritis                                | IKZF3                          |
| 17q12   | 38026169  | rs11655198  | 1.0×10 <sup>-63</sup> | 14594   | 0.842 | rs2872507  | 5.0×10 <sup>-9</sup>   | 18587394  | Crohn's disease                                     | ORMDL3                         |
| 17q12   | 38026169  | rs11655198  | 1.0×10 <sup>-63</sup> | 25179   | 0.964 | rs8067378  | 9.0×10 <sup>-10</sup>  | 23817570  | Cervical cancer                                     | GSDMB                          |
| 17q12   | 38026169  | rs11655198  | 1.0×10 <sup>-63</sup> | 36027   | 0.815 | rs2305480  | 1.0×10 <sup>-7</sup>   | 20860503  | Asthma                                              | GSDMB                          |
| 17q12   | 38026169  | rs11655198  | 1.0×10 <sup>-63</sup> | 36027   | 0.815 | rs2305480  | 3.0×10 <sup>-8</sup>   | 20228799  | Ulcerative colitis                                  | ORMDL3,ZPBP2M,GSDML            |
| 17q12   | 38026169  | rs11655198  | 1.0×10 <sup>-63</sup> | 38236   | 0.811 | rs11078927 | 2.0×10 <sup>-16</sup>  | 21804549  | Asthma                                              | GSDMB                          |
| 17q12   | 38026169  | rs11655198  | 1.0×10 <sup>-63</sup> | 40071   | 0.896 | rs2290400  | 6.0×10 <sup>-13</sup>  | 19430480  | Type 1 diabetes                                     | ORMDL3                         |
| 17q12   | 38026169  | rs11655198  | 1.0×10 <sup>-63</sup> | 43780   | 0.885 | rs7216389  | 9.0×10 <sup>-11</sup>  | 17611496  | Asthma                                              | ORMDL3                         |
| 17q12   | 38026169  | rs11655198  | 1.0×10 <sup>-63</sup> | 47862   | 0.840 | rs9303280  | 9.0×10 <sup>-9</sup>   | 23817569  | Self-reported allergy                               | GSDMB, IKZF3                   |
| 17q12   | 38026169  | rs11655198  | 1.0×10 <sup>-63</sup> | 63175   | 0.677 | rs4794820  | 1.0×10 <sup>-8</sup>   | 22561531  | Asthma                                              | ORMDL3                         |
| 6p21.32 | 32603487  | rs3104367   | 1.0×10 <sup>-40</sup> | 885     | 0.796 | rs9272346  | 2.0×10 <sup>-8</sup>   | 23181788  | Asthma                                              | HLA-DQA1                       |
| 6p21.32 | 32603487  | rs3104367   | 1.0×10 <sup>-40</sup> | 885     | 0.796 | rs9272346  | 6.0×10 <sup>-129</sup> | 18978792  | Type 1 diabetes                                     | HLA                            |
| 6p21.32 | 32603487  | rs3104367   | 1.0×10 <sup>-40</sup> | 885     | 0.796 | rs9272346  | 5.0×10 <sup>-134</sup> | 17554300  | Type 1 diabetes                                     | MHC                            |
| 9p24.1  | 6208030   | rs144829310 | 1.3×10 <sup>-31</sup> | -35650  | 0.940 | rs7032572  | 2.0×10 <sup>-9</sup>   | 23817569  | Self-reported allergy                               | RANBP6, IL33                   |
| 9p24.1  | 6208030   | rs144829310 | 1.3×10 <sup>-31</sup> | -17954  | 0.959 | rs1342326  | 9.0×10 <sup>-10</sup>  | 20860503  | Asthma                                              | IL33                           |
| 9p24.1  | 6208030   | rs144829310 | 1.3×10 <sup>-31</sup> | -14575  | 0.534 | rs2381416  | 2.0×10 <sup>-12</sup>  | 21804549  | Asthma                                              | IL33                           |
| 5q22.1  | 110401872 | rs1837253   | 3.3×10 <sup>-31</sup> | 0       | 1.000 | rs1837253  | 1.0×10 <sup>-14</sup>  | 21804549  | Asthma                                              | TSLP                           |
| 5q22.1  | 110401872 | rs1837253   | 3.3×10 <sup>-31</sup> | 0       | 1.000 | rs1837253  | 1.0×10 <sup>-16</sup>  | 21804548  | Asthma                                              | TSLP                           |
| 2q12.1  | 102913642 | rs202011557 | 5.1×10 <sup>-31</sup> | -34178  | 0.819 | rs10189629 | 2.0×10 <sup>-16</sup>  | 23817569  | Self-reported allergy                               | IL1RL2, IL1RL1                 |
| 2q12.1  | 102913642 | rs202011557 | 5.1×10 <sup>-31</sup> | 39975   | 0.915 | rs3771180  | 2.0×10 <sup>-15</sup>  | 21804549  | Asthma                                              | IL1RL1                         |
| 2q12.1  | 102913642 | rs202011557 | 5.1×10 <sup>-31</sup> | 41440   | 0.915 | rs13408661 | 1.0×10 <sup>-9</sup>   | 23028483  | Asthma                                              | IL1RL1, IL18R1                 |

|          |           |             |                       |        |       |            |                       |          |                                             |                               |
|----------|-----------|-------------|-----------------------|--------|-------|------------|-----------------------|----------|---------------------------------------------|-------------------------------|
| 2q12.1   | 102913642 | rs202011557 | $5.1 \times 10^{-31}$ | 46568  | 0.896 | rs3771175  | $5.0 \times 10^{-11}$ | 23817571 | Allergic sensitization                      | IL1RL1, IL18R1, IL18RAP       |
| 15q22.33 | 67448363  | rs56375023  | $2.4 \times 10^{-21}$ | -5767  | 0.984 | rs17293632 | $6.0 \times 10^{-16}$ | 23128233 | Inflammatory bowel disease                  | SMAD3                         |
| 15q22.33 | 67448363  | rs56375023  | $2.4 \times 10^{-21}$ | -5767  | 0.984 | rs17293632 | $3.0 \times 10^{-19}$ | 21102463 | Crohn's disease                             | SMAD3                         |
| 15q22.33 | 67448363  | rs56375023  | $2.4 \times 10^{-21}$ | 1942   | 0.992 | rs17228058 | $1.0 \times 10^{-8}$  | 23817569 | Self-reported allergy                       | SMAD3                         |
| 11q13.5  | 76293758  | rs7936323   | $1.4 \times 10^{-16}$ | -23075 | 0.570 | rs7130588  | $4.0 \times 10^{-13}$ | 23886662 | Atopic dermatitis                           | C11orf30,LRRC32               |
| 11q13.5  | 76293758  | rs7936323   | $1.4 \times 10^{-16}$ | -23075 | 0.570 | rs7130588  | $2.0 \times 10^{-8}$  | 21907864 | Asthma                                      | LRRC32                        |
| 11q13.5  | 76293758  | rs7936323   | $1.4 \times 10^{-16}$ | 5436   | 0.898 | rs2155219  | $1.0 \times 10^{-18}$ | 23817571 | Allergic sensitization                      | C11orf30, LRRC32              |
| 11q13.5  | 76293758  | rs7936323   | $1.4 \times 10^{-16}$ | 5436   | 0.898 | rs2155219  | $2.0 \times 10^{-19}$ | 23817569 | Self-reported allergy                       | C11orf30, LRRC32              |
| 11q13.5  | 76293758  | rs7936323   | $1.4 \times 10^{-16}$ | 5436   | 0.898 | rs2155219  | $4.0 \times 10^{-36}$ | 23128233 | Inflammatory bowel disease                  | Intergenic                    |
| 11q13.5  | 76293758  | rs7936323   | $1.4 \times 10^{-16}$ | 5436   | 0.898 | rs2155219  | $1.0 \times 10^{-8}$  | 22036096 | IgE grass sensitization                     | C11orf30, LRRC32              |
| 11q13.5  | 76293758  | rs7936323   | $1.4 \times 10^{-16}$ | 5436   | 0.898 | rs2155219  | $4.0 \times 10^{-8}$  | 22036096 | Allergic rhinitis                           | C11orf30, LRRC32              |
| 11q13.5  | 76293758  | rs7936323   | $1.4 \times 10^{-16}$ | 5436   | 0.898 | rs2155219  | $5.0 \times 10^{-16}$ | 21297633 | Ulcerative colitis                          | Intergenic                    |
| 11q13.5  | 76293758  | rs7936323   | $1.4 \times 10^{-16}$ | 7558   | 0.642 | rs7927894  | $8.0 \times 10^{-10}$ | 19349984 | Atopic dermatitis                           | C11orf30                      |
| 11q13.5  | 76293758  | rs7936323   | $1.4 \times 10^{-16}$ | 7558   | 0.642 | rs7927894  | $1.0 \times 10^{-9}$  | 18587394 | Crohn's disease                             | C11orf30                      |
| 11q13.5  | 76293758  | rs7936323   | $1.4 \times 10^{-16}$ | 7617   | 0.642 | rs7927997  | $6.0 \times 10^{-13}$ | 21102463 | Crohn's disease                             | C11orf30                      |
| 5q31.1   | 131901225 | rs2244012   | $2.1 \times 10^{-16}$ | 0      | 1.000 | rs2244012  | $3.0 \times 10^{-7}$  | 20159242 | Asthma                                      | RAD50                         |
| 5q31.1   | 131901225 | rs2244012   | $2.1 \times 10^{-16}$ | 71952  | 1.000 | rs2040704  | $4.0 \times 10^{-8}$  | 18846228 | IgE levels                                  | RAD50                         |
| 16p13.13 | 11230703  | rs7203459   | $3.5 \times 10^{-15}$ | -50830 | 0.508 | rs12708716 | $5.0 \times 10^{-14}$ | 21829393 | Type 1 diabetes autoantibodies              | CLEC16A                       |
| 16p13.13 | 11230703  | rs7203459   | $3.5 \times 10^{-15}$ | -50830 | 0.508 | rs12708716 | $2.0 \times 10^{-16}$ | 19430480 | Type 1 diabetes                             | CLEC16A                       |
| 16p13.13 | 11230703  | rs7203459   | $3.5 \times 10^{-15}$ | -50830 | 0.508 | rs12708716 | $7.0 \times 10^{-13}$ | 18978792 | Type 1 diabetes                             | CLEC16A                       |
| 16p13.13 | 11230703  | rs7203459   | $3.5 \times 10^{-15}$ | -50830 | 0.508 | rs12708716 | $5.0 \times 10^{-7}$  | 17554300 | Type 1 diabetes                             | KIAA0350                      |
| 16p13.13 | 11230703  | rs7203459   | $3.5 \times 10^{-15}$ | -50830 | 0.508 | rs12708716 | $3.0 \times 10^{-18}$ | 17554260 | Type 1 diabetes                             | KIAA0350                      |
| 16p13.13 | 11230703  | rs7203459   | $3.5 \times 10^{-15}$ | -20288 | 0.500 | rs9923856  | $6.0 \times 10^{-6}$  | 23042114 | Atopic dermatitis                           | CLEC16A                       |
| 16p13.13 | 11230703  | rs7203459   | $3.5 \times 10^{-15}$ | 0      | 1.000 | rs7203459  | $2.0 \times 10^{-7}$  | 23817569 | Self-reported allergy                       | CLEC16A                       |
| 16p13.13 | 11230703  | rs7203459   | $3.5 \times 10^{-15}$ | 8080   | 0.617 | rs2903692  | $7.0 \times 10^{-11}$ | 17632545 | Type 1 diabetes                             | KIAA0350                      |
| 8q21.13  | 81285139  | rs10957978  | $1.1 \times 10^{-11}$ | -16984 | 0.853 | rs6473223  | $8.0 \times 10^{-8}$  | 23817569 | Self-reported allergy                       | TPD52, ZBTB10                 |
| 8q21.13  | 81285139  | rs10957978  | $1.1 \times 10^{-11}$ | 23011  | 0.561 | rs7000782  | $1.0 \times 10^{-6}$  | 22197932 | Atopic dermatitis                           | ZBTB10                        |
| 15q22.2  | 61068704  | rs10519068  | $3.8 \times 10^{-11}$ | 1284   | 0.955 | rs11071559 | $1.0 \times 10^{-7}$  | 20860503 | Asthma                                      | RORA                          |
| 4p14     | 38798648  | rs5743618   | $3.9 \times 10^{-11}$ | -13924 | 0.640 | rs10004195 | $1.0 \times 10^{-18}$ | 23652523 | Helicobacter pylori serologic status        | TLR10,TLR1,FAM114A1,TLR6,KLF3 |
| 4p14     | 38798648  | rs5743618   | $3.9 \times 10^{-11}$ | -6124  | 0.619 | rs4543123  | $9.0 \times 10^{-6}$  | 23743675 | Alcohol consumption                         | Intergenic                    |
| 4p14     | 38798648  | rs5743618   | $3.9 \times 10^{-11}$ | 12903  | 0.594 | rs2101521  | $5.0 \times 10^{-21}$ | 23817569 | Self-reported allergy                       | TLR1,TLR6,TLR10               |
| 4p14     | 38798648  | rs5743618   | $3.9 \times 10^{-11}$ | 14228  | 0.677 | rs17616434 | $5.0 \times 10^{-11}$ | 23817571 | Allergic sensitization                      | TLR1,TLR6, TLR10, ...         |
| 6q15     | 90985198  | rs58521088  | $7.1 \times 10^{-11}$ | -58586 | 0.713 | rs10806425 | $4.0 \times 10^{-10}$ | 20190752 | Celiac disease                              | BACH2, MAP3K7                 |
| 6q15     | 90985198  | rs58521088  | $7.1 \times 10^{-11}$ | -27735 | 0.576 | rs3757247  | $3.0 \times 10^{-8}$  | 22561518 | Vitiligo                                    | BACH2                         |
| 6q15     | 90985198  | rs58521088  | $7.1 \times 10^{-11}$ | -27735 | 0.576 | rs3757247  | $1.0 \times 10^{-6}$  | 18840781 | Type 1 diabetes                             | BACH2                         |
| 6q15     | 90985198  | rs58521088  | $7.1 \times 10^{-11}$ | -26967 | 0.616 | rs11755527 | $3.0 \times 10^{-8}$  | 21829393 | Type 1 diabetes autoantibodies              | BACH2                         |
| 6q15     | 90985198  | rs58521088  | $7.1 \times 10^{-11}$ | -26967 | 0.616 | rs11755527 | $5.0 \times 10^{-8}$  | 19430480 | Type 1 diabetes                             | BACH2                         |
| 6q15     | 90985198  | rs58521088  | $7.1 \times 10^{-11}$ | -26967 | 0.616 | rs11755527 | $5.0 \times 10^{-12}$ | 18978792 | Type 1 diabetes                             | BACH2                         |
| 6q15     | 90985198  | rs58521088  | $7.1 \times 10^{-11}$ | -12039 | 0.966 | rs1847472  | $2.0 \times 10^{-10}$ | 23128233 | Inflammatory bowel disease                  | Intergenic                    |
| 6q15     | 90985198  | rs58521088  | $7.1 \times 10^{-11}$ | -12039 | 0.966 | rs1847472  | $5.0 \times 10^{-9}$  | 21102463 | Crohn's disease                             | BACH2                         |
| 6q15     | 90985198  | rs58521088  | $7.1 \times 10^{-11}$ | 11571  | 0.677 | rs12212193 | $4.0 \times 10^{-8}$  | 21833088 | Multiple sclerosis                          | BACH2                         |
| 12q13.3  | 57509055  | rs3001426   | $1.4 \times 10^{-10}$ | -5280  | 0.674 | rs167769   | $2.0 \times 10^{-6}$  | 20208534 | Eosinophilic esophagitis (pediatric)        | STAT6                         |
| 12q13.3  | 57509055  | rs3001426   | $1.4 \times 10^{-10}$ | 18228  | 0.602 | rs11172113 | $1.0 \times 10^{-10}$ | 23793025 | Migraine without aura                       | LRP1                          |
| 12q13.3  | 57509055  | rs3001426   | $1.4 \times 10^{-10}$ | 18228  | 0.602 | rs11172113 | $1.0 \times 10^{-6}$  | 23793025 | Migraine - clinic-based                     | LRP1                          |
| 12q13.3  | 57509055  | rs3001426   | $1.4 \times 10^{-10}$ | 18228  | 0.602 | rs11172113 | $4.0 \times 10^{-19}$ | 23793025 | Migraine                                    | LRP1                          |
| 12q13.3  | 57509055  | rs3001426   | $1.4 \times 10^{-10}$ | 18228  | 0.602 | rs11172113 | $8.0 \times 10^{-6}$  | 23284291 | Pulmonary function (interaction)            | LRP1                          |
| 12q13.3  | 57509055  | rs3001426   | $1.4 \times 10^{-10}$ | 18228  | 0.602 | rs11172113 | $3.0 \times 10^{-8}$  | 22683712 | Migraine                                    | LRP1                          |
| 12q13.3  | 57509055  | rs3001426   | $1.4 \times 10^{-10}$ | 18228  | 0.602 | rs11172113 | $1.0 \times 10^{-8}$  | 21946350 | Pulmonary function                          | LRP1                          |
| 12q13.3  | 57509055  | rs3001426   | $1.4 \times 10^{-10}$ | 18228  | 0.602 | rs11172113 | $4.0 \times 10^{-9}$  | 21666692 | Migraine                                    | LRP1                          |
| 2p25.1   | 8458080   | rs13412757  | $1.3 \times 10^{-8}$  | -15832 | 0.761 | rs10174949 | $1.0 \times 10^{-7}$  | 23817569 | Self-reported allergy                       | ID2                           |
| 1q24.2   | 167433420 | rs1723018   | $1.4 \times 10^{-8}$  | -12995 | 0.908 | rs2056626  | $3.0 \times 10^{-6}$  | 21779181 | Systemic sclerosis                          | CD247                         |
| 1q24.2   | 167433420 | rs1723018   | $1.4 \times 10^{-8}$  | -12995 | 0.908 | rs2056626  | $1.0 \times 10^{-6}$  | 21750679 | Systemic sclerosis                          | CD247                         |
| 1q24.2   | 167433420 | rs1723018   | $1.4 \times 10^{-8}$  | -12995 | 0.908 | rs2056626  | $3.0 \times 10^{-9}$  | 20383147 | Systemic sclerosis                          | CD247                         |
| 14q24.1  | 68749927  | rs3784099   | $1.6 \times 10^{-8}$  | 0      | 1.000 | rs3784099  | $3.0 \times 10^{-7}$  | 22232737 | Breast cancer (survival)                    | RAD51L1                       |
| 14q24.1  | 68749927  | rs3784099   | $1.6 \times 10^{-8}$  | 3666   | 0.982 | rs911263   | $2.0 \times 10^{-11}$ | 21399635 | Primary biliary cirrhosis                   | RAD51L1                       |
| 14q24.1  | 68749927  | rs3784099   | $1.6 \times 10^{-8}$  | 35150  | 0.718 | rs8017304  | $9.0 \times 10^{-11}$ | 23455636 | Age-related macular degeneration            | RAD51B                        |
| 14q24.1  | 68749927  | rs3784099   | $1.6 \times 10^{-8}$  | 38997  | 0.718 | rs1956529  | $3.0 \times 10^{-8}$  | 20195514 | Primary tooth development (number of teeth) | RAD51L1                       |
| 14q24.1  | 68749927  | rs3784099   | $1.6 \times 10^{-8}$  | 63188  | 0.535 | rs1570106  | $8.0 \times 10^{-9}$  | 20881960 | Height                                      | RAD51L1                       |
| 5q31.3   | 141529761 | rs200634877 | $2.5 \times 10^{-8}$  | -16557 | 0.764 | rs6863411  | $4.0 \times 10^{-14}$ | 23128233 | Inflammatory bowel disease                  | SPRY4,NDFIP1                  |
| 5q31.3   | 141529761 | rs200634877 | $2.5 \times 10^{-8}$  | -6761  | 0.764 | rs1062158  | $2.0 \times 10^{-6}$  | 21833088 | Multiple sclerosis                          | NDFIP1                        |
| 1p36.22  | 10557251  | rs662064    | $3.2 \times 10^{-8}$  | 8964   | 0.703 | rs616488   | $1.0 \times 10^{-8}$  | 23535733 | Breast cancer                               | PEX14                         |
| 1p36.22  | 10557251  | rs662064    | $3.2 \times 10^{-8}$  | 8964   | 0.703 | rs616488   | $2.0 \times 10^{-10}$ | 23535729 | Breast cancer                               | PEX14                         |
| 1p36.22  | 10557251  | rs662064    | $3.2 \times 10^{-8}$  | 24407  | 0.856 | rs2056417  | $4.0 \times 10^{-7}$  | 23817569 | Self-reported allergy                       | PEX14                         |

## Replication of GWAS Catalog Results

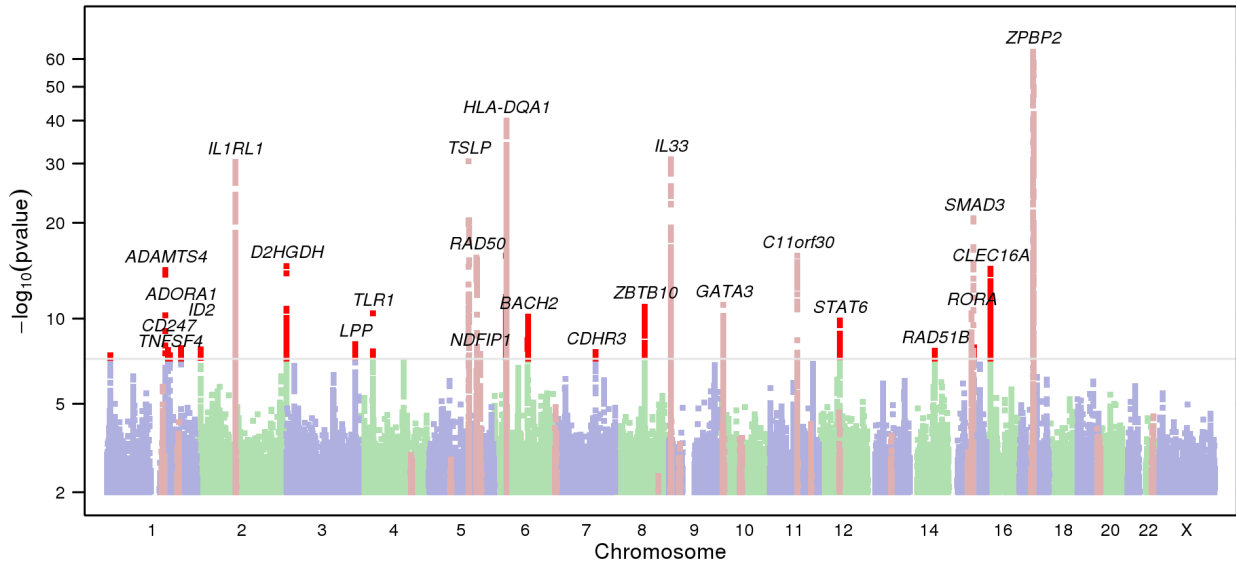

The following table shows, for each GWAS Catalog result for similar traits, our association test result for our best available proxy (distance < 100kb,  $r^2 > 0.8$ ).

| region   | position  | our.name   | our.pval              | dist | rsqr  | assay.name | pvalue                | pubmed.id | trait  | genes          |
|----------|-----------|------------|-----------------------|------|-------|------------|-----------------------|-----------|--------|----------------|
| 1q21.3   | 152492559 | rs4845783  | 0.097                 | 0    | 1.000 | rs4845783  | $6.0 \times 10^{-6}$  | 21804549  | Asthma | CRCT1          |
| 1q21.3   | 154426264 | rs4129267  | 0.0097                | 0    | 1.000 | rs4129267  | $2.0 \times 10^{-8}$  | 21907864  | Asthma | IL6R           |
| 1q23.1   | 158932555 | rs1101999  | 0.51                  | 0    | 1.000 | rs1101999  | $4.0 \times 10^{-9}$  | 21804549  | Asthma | PYHIN1         |
| 1q31.3   | 197325908 | rs2786098  | 0.48                  | 0    | 1.000 | rs2786098  | $2.0 \times 10^{-13}$ | 20032318  | Asthma | DENND1B, CRB1  |
| 2q12.1   | 102953617 | rs3771180  | $9.0 \times 10^{-30}$ | 0    | 1.000 | rs3771180  | $2.0 \times 10^{-15}$ | 21804549  | Asthma | IL1RL1         |
| 2q12.1   | 102955082 | rs13408661 | $1.1 \times 10^{-29}$ | 0    | 1.000 | rs13408661 | $1.0 \times 10^{-9}$  | 23028483  | Asthma | IL1RL1, IL18R1 |
| 2q12.1   | 102971200 | rs9807989  | $2.5 \times 10^{-24}$ | 0    | 1.000 | rs9807989  | $6.0 \times 10^{-8}$  | 22561531  | Asthma | IL18R1, IL1R1  |
| 2q12.1   | 102986222 | rs3771166  | $3.6 \times 10^{-22}$ | 0    | 1.000 | rs3771166  | $3.0 \times 10^{-9}$  | 20860503  | Asthma | IL18R1         |
| 4q31.21  | 144003159 | rs7686660  | 0.37                  | 0    | 1.000 | rs7686660  | $2.0 \times 10^{-12}$ | 21804548  | Asthma | LOC729675      |
| 4q31.21  | 144357737 | rs3805236  | 0.62                  | 0    | 1.000 | rs3805236  | $7.0 \times 10^{-8}$  | 21804548  | Asthma | GAB1           |
| 5q12.1   | 59369794  | rs1588265  | 0.19                  | 0    | 1.000 | rs1588265  | $3.0 \times 10^{-8}$  | 19426955  | Asthma | PDE4D          |
| 5q22.1   | 110401872 | rs1837253  | $3.3 \times 10^{-31}$ | 0    | 1.000 | rs1837253  | $1.0 \times 10^{-14}$ | 21804549  | Asthma | TSLP           |
| 5q22.1   | 110401872 | rs1837253  | $3.3 \times 10^{-31}$ | 0    | 1.000 | rs1837253  | $1.0 \times 10^{-16}$ | 21804548  | Asthma | TSLP           |
| 5q31.1   | 131723288 | rs2073643  | 0.00042               | 0    | 1.000 | rs2073643  | $2.0 \times 10^{-7}$  | 20860503  | Asthma | SLC22A5        |
| 5q31.1   | 131796922 | rs11745587 | $1.1 \times 10^{-6}$  | 0    | 1.000 | rs11745587 | $2.0 \times 10^{-6}$  | 22561531  | Asthma | C5orf56        |
| 5q31.1   | 131901225 | rs2244012  | $2.1 \times 10^{-16}$ | 0    | 1.000 | rs2244012  | $3.0 \times 10^{-7}$  | 20159242  | Asthma | RAD50          |
| 5q31.1   | 131995843 | rs1295686  | $2.5 \times 10^{-13}$ | 0    | 1.000 | rs1295686  | $1.0 \times 10^{-7}$  | 20860503  | Asthma | IL13           |
| 5q31.3   | 141445980 | rs6867913  | 0.0070                | 0    | 1.000 | rs6867913  | $4.0 \times 10^{-6}$  | 22561531  | Asthma | NDFIP1         |
| 6p21.32  | 32155581  | rs204993   | $1.0 \times 10^{-6}$  | 0    | 1.000 | rs204993   | $2.0 \times 10^{-15}$ | 21804548  | Asthma | PBX2           |
| 6p21.32  | 32184345  | rs404860   | 0.11                  | 0    | 1.000 | rs404860   | $4.0 \times 10^{-23}$ | 21804548  | Asthma | NOTCH4         |
| 6p21.32  | 32338695  | rs3129943  | 0.58                  | 0    | 1.000 | rs3129943  | $3.0 \times 10^{-15}$ | 21804548  | Asthma | C6orf10        |
| 6p21.32  | 32358513  | rs3117098  | $4.2 \times 10^{-6}$  | 0    | 1.000 | rs3117098  | $5.0 \times 10^{-12}$ | 21804548  | Asthma | BTNL2          |
| 6p21.32  | 32379489  | rs9268516  | $1.3 \times 10^{-21}$ | 0    | 1.000 | rs9268516  | $1.0 \times 10^{-8}$  | 23028483  | Asthma | BTNL2, HLA-DRA |
| 6p21.32  | 32414273  | rs3129890  | 0.13                  | 0    | 1.000 | rs3129890  | $5.0 \times 10^{-13}$ | 21804548  | Asthma | HLA-DRA        |
| 6p21.32  | 32604372  | rs9272346  | $6.8 \times 10^{-34}$ | 0    | 1.000 | rs9272346  | $2.0 \times 10^{-8}$  | 23181788  | Asthma | HLA-DQA1       |
| 6p21.32  | 32625869  | rs9273349  | $9.2 \times 10^{-33}$ | 0    | 1.000 | rs9273349  | $7.0 \times 10^{-14}$ | 20860503  | Asthma | HLA-DQ         |
| 6p21.32  | 32658079  | rs7775228  | $3.9 \times 10^{-5}$  | 0    | 1.000 | rs7775228  | $5.0 \times 10^{-15}$ | 21804548  | Asthma | HLA-DQB1       |
| 6p21.32  | 32687973  | rs9275698  | 0.33                  | 0    | 1.000 | rs9275698  | $5.0 \times 10^{-12}$ | 21804548  | Asthma | HLA-DQA2       |
| 6p21.32  | 32961361  | rs9500927  | $2.6 \times 10^{-5}$  | 0    | 1.000 | rs9500927  | $4.0 \times 10^{-9}$  | 21804548  | Asthma | HLA-DOA        |
| 6p21.32  | 33042880  | rs987870   | $2.8 \times 10^{-6}$  | 0    | 1.000 | rs987870   | $2.0 \times 10^{-10}$ | 21814517  | Asthma | HLA, DPB1      |
| 6q27     | 166534742 | rs6456042  | 0.46                  | 0    | 1.000 | rs6456042  | $6.0 \times 10^{-6}$  | 22538805  | Asthma | T              |
| 8q24.11  | 118025645 | rs3019885  | 0.13                  | 0    | 1.000 | rs3019885  | $5.0 \times 10^{-13}$ | 21814517  | Asthma | SLC30A8        |
| 9p24.1   | 6190076   | rs1342326  | $1.7 \times 10^{-31}$ | 0    | 1.000 | rs1342326  | $9.0 \times 10^{-10}$ | 20860503  | Asthma | IL33           |
| 9p24.1   | 6193455   | rs2381416  | $3.7 \times 10^{-25}$ | 0    | 1.000 | rs2381416  | $2.0 \times 10^{-12}$ | 21804549  | Asthma | IL33           |
| 9p21.1   | 32433526  | rs10970976 | 0.61                  | 0    | 1.000 | rs10970976 | $4.0 \times 10^{-6}$  | 22561531  | Asthma | ACO1           |
| 10p14    | 8972018   | rs10508372 | $2.0 \times 10^{-5}$  | 0    | 1.000 | rs10508372 | $2.0 \times 10^{-15}$ | 21804548  | Asthma | LOC338591      |
| 10q21.1  | 53493473  | rs7922491  | 0.23                  | 0    | 1.000 | rs7922491  | $5.0 \times 10^{-7}$  | 21907864  | Asthma | PRKG1          |
| 11q13.5  | 76270683  | rs7130588  | $1.4 \times 10^{-11}$ | 0    | 1.000 | rs7130588  | $2.0 \times 10^{-8}$  | 21907864  | Asthma | LRRC32         |
| 11q23.2  | 114231255 | rs11214966 | 0.70                  | 0    | 1.000 | rs11214966 | $6.0 \times 10^{-7}$  | 21804549  | Asthma | C11orf71       |
| 12q13.2  | 56364321  | rs2069408  | 0.017                 | 0    | 1.000 | rs2069408  | $1.0 \times 10^{-10}$ | 21804548  | Asthma | CDK2           |
| 12q13.2  | 56412487  | rs1701704  | 0.0034                | 0    | 1.000 | rs1701704  | $2.0 \times 10^{-13}$ | 21804548  | Asthma | IKZF4          |
| 13q21.31 | 63638329  | rs3119939  | 0.88                  | 0    | 1.000 | rs3119939  | $8.0 \times 10^{-6}$  | 21907864  | Asthma | PCDH20         |
| 15q21.2  | 51969668  | rs17525472 | 0.88                  | 0    | 1.000 | rs17525472 | $2.0 \times 10^{-6}$  | 20159242  | Asthma | SCG3           |
| 15q22.2  | 61069988  | rs11071559 | $6.8 \times 10^{-11}$ | 0    | 1.000 | rs11071559 | $1.0 \times 10^{-7}$  | 20860503  | Asthma | RORA           |
| 15q22.33 | 67446785  | rs744910   | $2.2 \times 10^{-11}$ | 0    | 1.000 | rs744910   | $4.0 \times 10^{-9}$  | 20860503  | Asthma | SMAD3          |
| 17q12    | 38062196  | rs2305480  | $2.6 \times 10^{-62}$ | 0    | 1.000 | rs2305480  | $1.0 \times 10^{-7}$  | 20860503  | Asthma | GSDMB          |
| 17q12    | 38064405  | rs11078927 | $3.7 \times 10^{-62}$ | 0    | 1.000 | rs11078927 | $2.0 \times 10^{-16}$ | 21804549  | Asthma | GSDMB          |
| 17q12    | 38069949  | rs7216389  | $5.0 \times 10^{-62}$ | 0    | 1.000 | rs7216389  | $9.0 \times 10^{-11}$ | 17611496  | Asthma | ORMDL3         |

|          |          |            |                       |   |       |            |                      |          |        |          |
|----------|----------|------------|-----------------------|---|-------|------------|----------------------|----------|--------|----------|
| 17q12    | 38089344 | rs4794820  | 4.5×10 <sup>-48</sup> | 0 | 1.000 | rs4794820  | 1.0×10 <sup>-8</sup> | 22561531 | Asthma | ORMDL3   |
| 17q12    | 38095174 | rs6503525  | 3.6×10 <sup>-38</sup> | 0 | 1.000 | rs6503525  | 5.0×10 <sup>-7</sup> | 21150878 | Asthma | ORMDL3   |
| 17q21.1  | 38121993 | rs3894194  | 1.5×10 <sup>-34</sup> | 0 | 1.000 | rs3894194  | 5.0×10 <sup>-9</sup> | 20860503 | Asthma | GSDMA    |
| 19q13.42 | 53682042 | rs16984547 | 0.74                  | 0 | 1.000 | rs16984547 | 4.0×10 <sup>-6</sup> | 22561531 | Asthma | ZNF665   |
| 20p13    | 3827309  | rs4815617  | 0.11                  | 0 | 1.000 | rs4815617  | 8.0×10 <sup>-6</sup> | 20159242 | Asthma | KIAA1271 |
| 22q12.3  | 37534034 | rs2284033  | 4.2×10 <sup>-5</sup>  | 0 | 1.000 | rs2284033  | 1.0×10 <sup>-8</sup> | 20860503 | Asthma | IL2RB    |

## Nearby Nonsynonymous SNPs

| region  | position  | our.name    | our.pval              | dist   | rsqr  | assay.name | gene     | aa.chg |
|---------|-----------|-------------|-----------------------|--------|-------|------------|----------|--------|
| 17q12   | 38026169  | rs11655198  | 1.0×10 <sup>-63</sup> | 2465   | 0.974 | rs11557467 | ZBPB2    | S173I  |
| 17q12   | 38026169  | rs11655198  | 1.0×10 <sup>-63</sup> | 36027  | 0.815 | rs2305480  | GSDMB    | P311S  |
| 17q12   | 38026169  | rs11655198  | 1.0×10 <sup>-63</sup> | 36048  | 0.943 | rs2305479  | GSDMB    | G304R  |
| 6p21.32 | 32603487  | rs3104367   | 1.0×10 <sup>-40</sup> | 1770   | 0.712 | rs1047989  | HLA-DQA1 | L8M    |
| 6p21.32 | 32603487  | rs3104367   | 1.0×10 <sup>-40</sup> | 5618   | 0.700 | rs1129740  | HLA-DQA1 | C34Y   |
| 6p21.32 | 32603487  | rs3104367   | 1.0×10 <sup>-40</sup> | 5639   | 0.868 | rs1071630  | HLA-DQA1 | F41S   |
| 6p21.32 | 32603487  | rs3104367   | 1.0×10 <sup>-40</sup> | 5720   | 0.570 | rs1142324  | HLA-DQA1 | A68V   |
| 6p21.32 | 32603487  | rs3104367   | 1.0×10 <sup>-40</sup> | 5825   | 0.581 | rs1129808  | HLA-DQA1 | Y103S  |
| 6p21.32 | 32603487  | rs3104367   | 1.0×10 <sup>-40</sup> | 6522   | 0.583 | rs2308891  | HLA-DQA1 | Q198?  |
| 2q12.1  | 102913642 | rs202011557 | 5.1×10 <sup>-31</sup> | 41826  | 0.516 | rs1041973  | IL1RL1   | A78E   |
| 2q37.3  | 242698640 | rs34290285  | 1.8×10 <sup>-15</sup> | -7965  | 0.814 | rs1106639  | D2HGDH   | V338I  |
| 4p14    | 38798648  | rs5743618   | 3.9×10 <sup>-11</sup> | 0      | 1.000 | rs5743618  | TLR1     | S602I  |
| 4p14    | 38798648  | rs5743618   | 3.9×10 <sup>-11</sup> | 1062   | 0.676 | rs4833095  | TLR1     | N248S  |
| 7q22.3  | 105676505 | rs6959584   | 2.0×10 <sup>-8</sup>  | -18054 | 0.693 | rs6967330  | CDHR3    | C529Y  |

## Nearby Expression QTLs

| region  | position  | our.name    | our.pval              | dist   | rsqr  | assay.name | eqtl.dist | eqtl.gene | eqtl.pval             | eqtl.rsqr | tissue         | pubmed.id |
|---------|-----------|-------------|-----------------------|--------|-------|------------|-----------|-----------|-----------------------|-----------|----------------|-----------|
| 1q23.3  | 161159147 | rs4233366   | 4.8×10 <sup>-15</sup> | 0      | 1.000 | rs4233366  | 29543     | FCER1G    | 1.4×10 <sup>-11</sup> | 0.151     | Monocyte       | 22446964  |
| 1q23.3  | 161159147 | rs4233366   | 4.8×10 <sup>-15</sup> | 19537  | 0.573 | rs3924264  | 162917    | USF1      | 7.6×10 <sup>-15</sup> | 0.043     | Monocyte       | 20502693  |
| 1q23.3  | 161159147 | rs4233366   | 4.8×10 <sup>-15</sup> | 30566  | 0.535 | rs4489574  | 0         | FCER1G    | 2.7×10 <sup>-9</sup>  | 0.027     | Monocyte       | 20502693  |
| 1q32.1  | 203100504 | rs6683383   | 1.1×10 <sup>-8</sup>  | -9528  | 0.983 | rs7555556  | 46049     | MYBPH     | 4.1×10 <sup>-8</sup>  | 0.102     | Monocyte       | 22446964  |
| 1q32.1  | 203100504 | rs6683383   | 1.1×10 <sup>-8</sup>  | -1686  | 1.000 | rs10920570 | 38121     | MYBPH     | 5.2×10 <sup>-18</sup> | 0.052     | Monocyte       | 20502693  |
| 1q32.1  | 203100504 | rs6683383   | 1.1×10 <sup>-8</sup>  | -1686  | 1.000 | rs10920570 | 37655     | ADORA1    | 2.0×10 <sup>-36</sup> | 0.434     | Monocyte       | 22446964  |
| 1q32.1  | 203100504 | rs6683383   | 1.1×10 <sup>-8</sup>  | 0      | 1.000 | rs6683383  | 0         | ADORA1    | 6.0×10 <sup>-96</sup> | 0.255     | Monocyte       | 20502693  |
| 1q32.1  | 203100504 | rs6683383   | 1.1×10 <sup>-8</sup>  | 8004   | 0.779 | rs10920573 | 60644     | PPFIA4    | 9.3×10 <sup>-6</sup>  | 0.015     | Monocyte       | 20502693  |
| 5q31.3  | 141529761 | rs200634877 | 2.5×10 <sup>-8</sup>  | -36373 | 0.764 | rs6863411  | -24880    | NDFIP1    | 8.1×10 <sup>-6</sup>  |           | Liver          | 18462017  |
| 5q31.3  | 141529761 | rs200634877 | 2.5×10 <sup>-8</sup>  | -36373 | 0.764 | rs6863411  | -983365   | PCDHB6    | 0.00012               |           | Liver          | 18462017  |
| 5q31.3  | 141529761 | rs200634877 | 2.5×10 <sup>-8</sup>  | -36373 | 0.764 | rs6863411  | 637088    | ARHGAP26  | 0.00017               |           | Liver          | 18462017  |
| 5q31.3  | 141529761 | rs200634877 | 2.5×10 <sup>-8</sup>  | -36373 | 0.764 | rs6863411  | -657635   | PCDHGC3   | 0.00024               |           | Liver          | 18462017  |
| 5q31.3  | 141529761 | rs200634877 | 2.5×10 <sup>-8</sup>  | -36373 | 0.764 | rs6863411  | -802952   | PCDHGA1   | 0.00035               |           | Liver          | 18462017  |
| 5q31.3  | 141529761 | rs200634877 | 2.5×10 <sup>-8</sup>  | -36373 | 0.764 | rs6863411  | -888057   | PCDHB15   | 0.00051               |           | Liver          | 18462017  |
| 5q31.3  | 141529761 | rs200634877 | 2.5×10 <sup>-8</sup>  | -36373 | 0.764 | rs6863411  | 459918    | FGF1      | 0.0035                |           | Liver          | 18462017  |
| 1p36.22 | 10557251  | rs662064    | 3.2×10 <sup>-8</sup>  | -17708 | 0.980 | rs607941   | -750269   | CLSTN1    | 0.00018               | 0.049     | B-Cell         | 22446964  |
| 1p36.22 | 10557251  | rs662064    | 3.2×10 <sup>-8</sup>  | -16740 | 0.533 | rs12402967 | -153706   | PGD       | 0.00010               |           | Lymphoblastoid | 20220756  |
| 1p36.22 | 10557251  | rs662064    | 3.2×10 <sup>-8</sup>  | -12704 | 0.980 | rs668805   | 0         | PEX14     | 1.2×10 <sup>-19</sup> | 0.057     | Monocyte       | 20502693  |
| 1p36.22 | 10557251  | rs662064    | 3.2×10 <sup>-8</sup>  | 6241   | 0.949 | rs2506901  | -72202    | APITD1    | 6.9×10 <sup>-9</sup>  | 0.113     | Monocyte       | 22446964  |

## Nearby Clinical Variants

| source  | region | our.name  | our.pval              | dist | rsqr  | assay.name | gene | phenotype | accession     |
|---------|--------|-----------|-----------------------|------|-------|------------|------|-----------|---------------|
| clinvar | 4p14   | rs5743618 | 3.9×10 <sup>-11</sup> | 0    | 1.000 | rs5743618  | TLR1 | Leprosy 5 | NCBI curation |
| clinvar | 4p14   | rs5743618 | 3.9×10 <sup>-11</sup> | 1062 | 0.676 | rs4833095  | TLR1 | Leprosy 5 | NCBI curation |

## Regional Association Plots

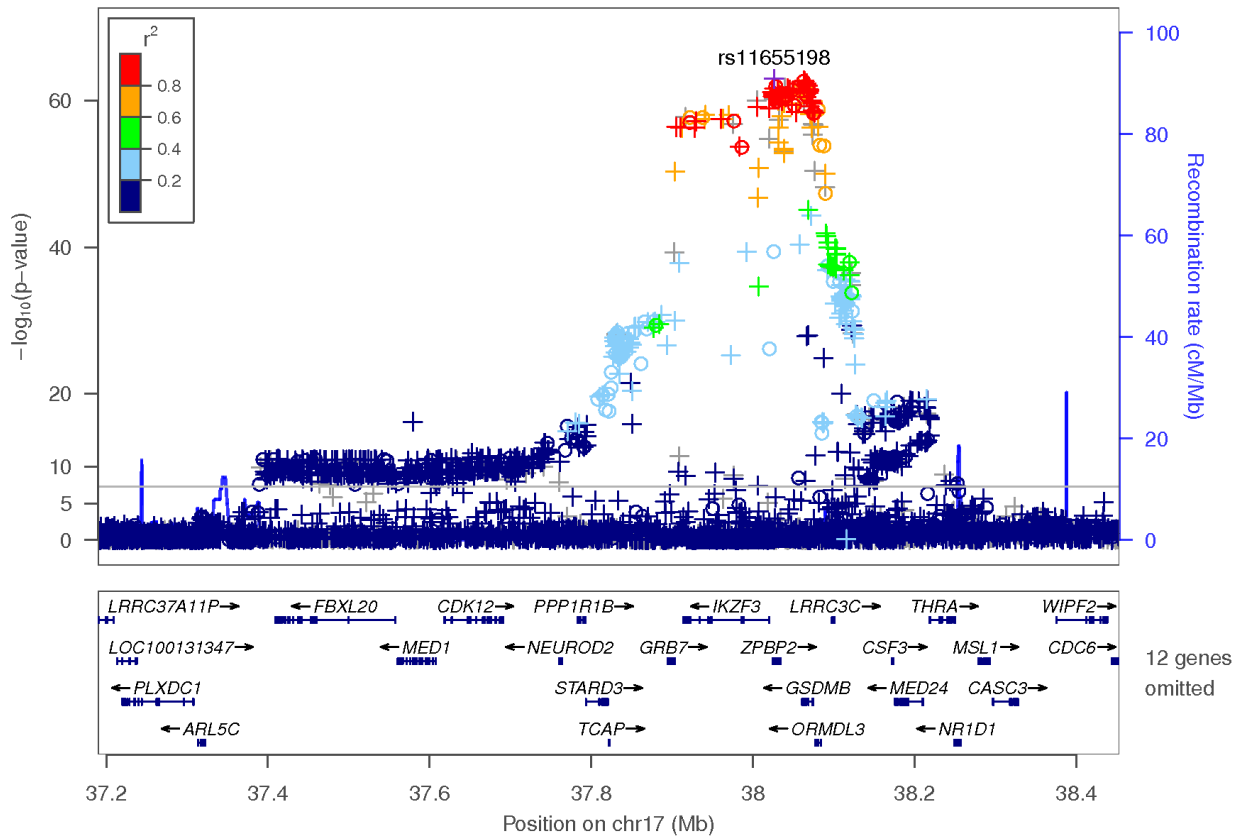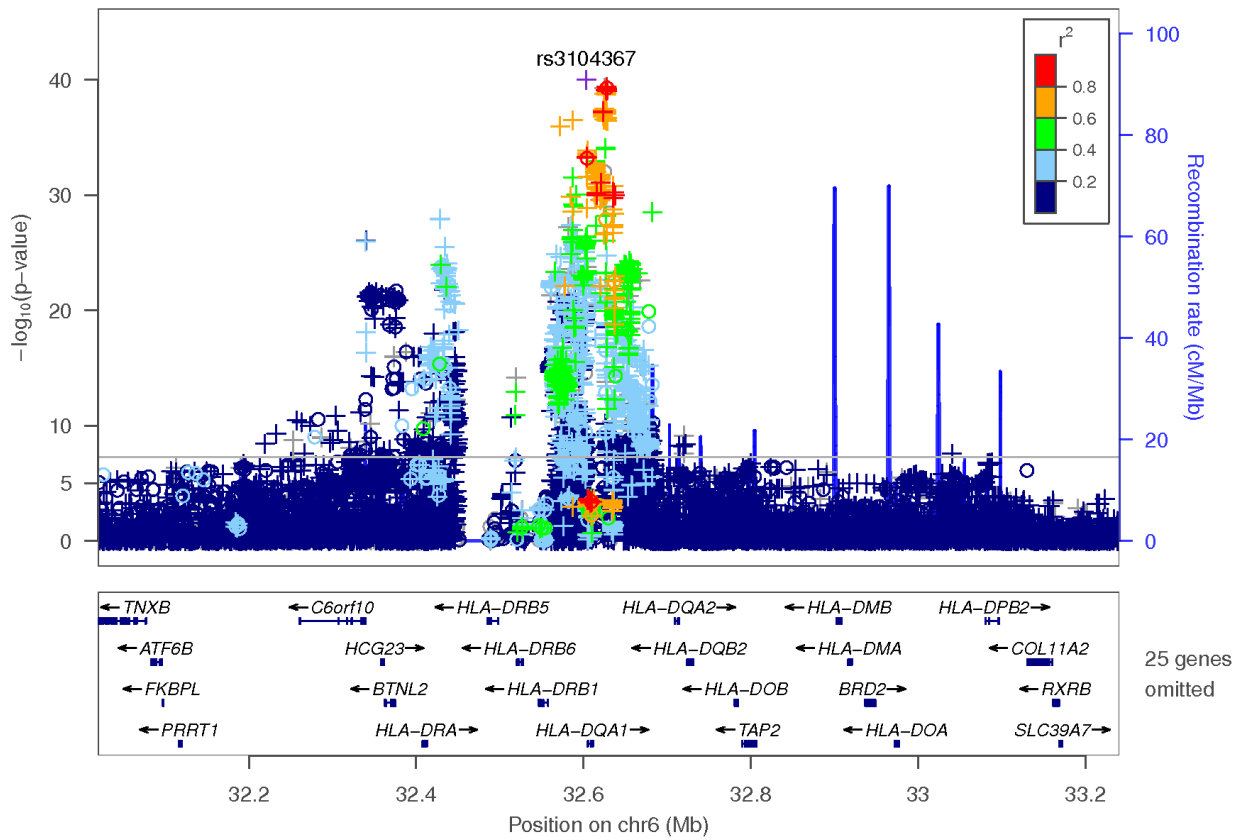



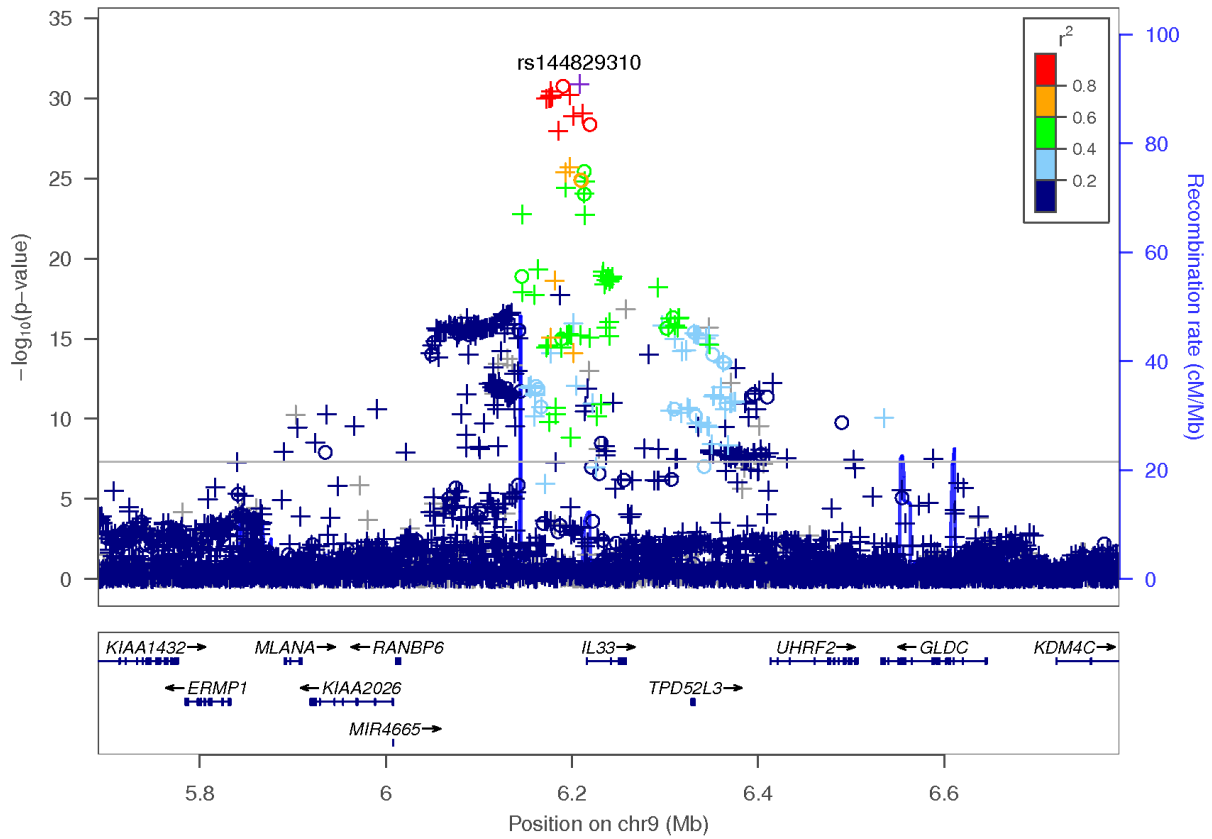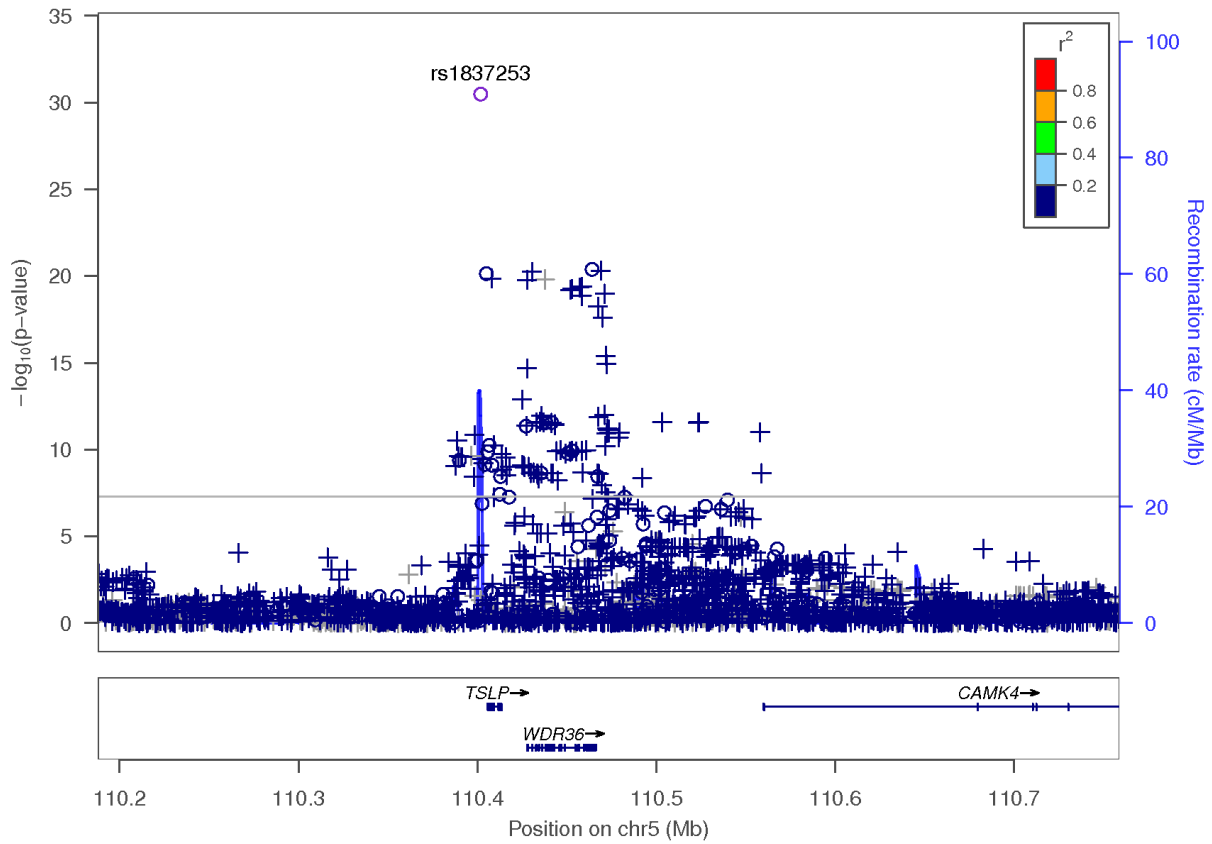

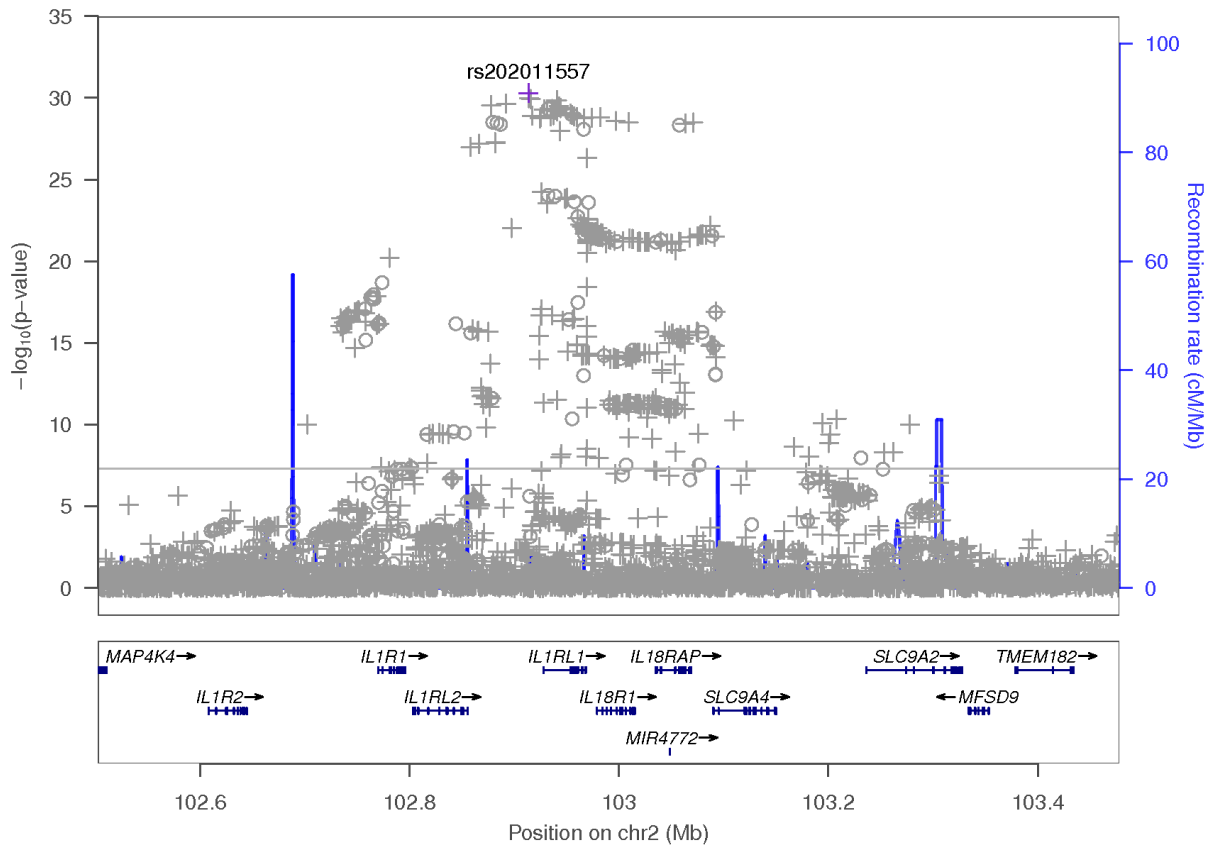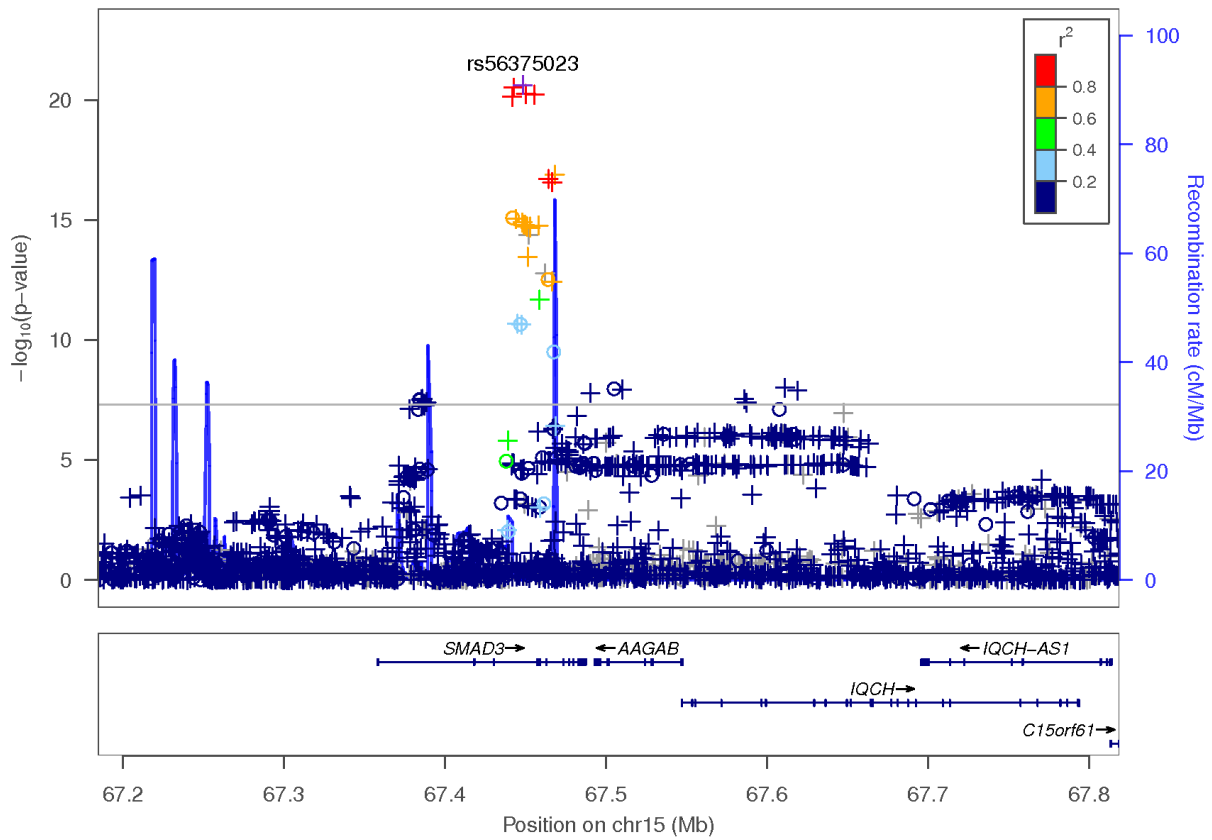

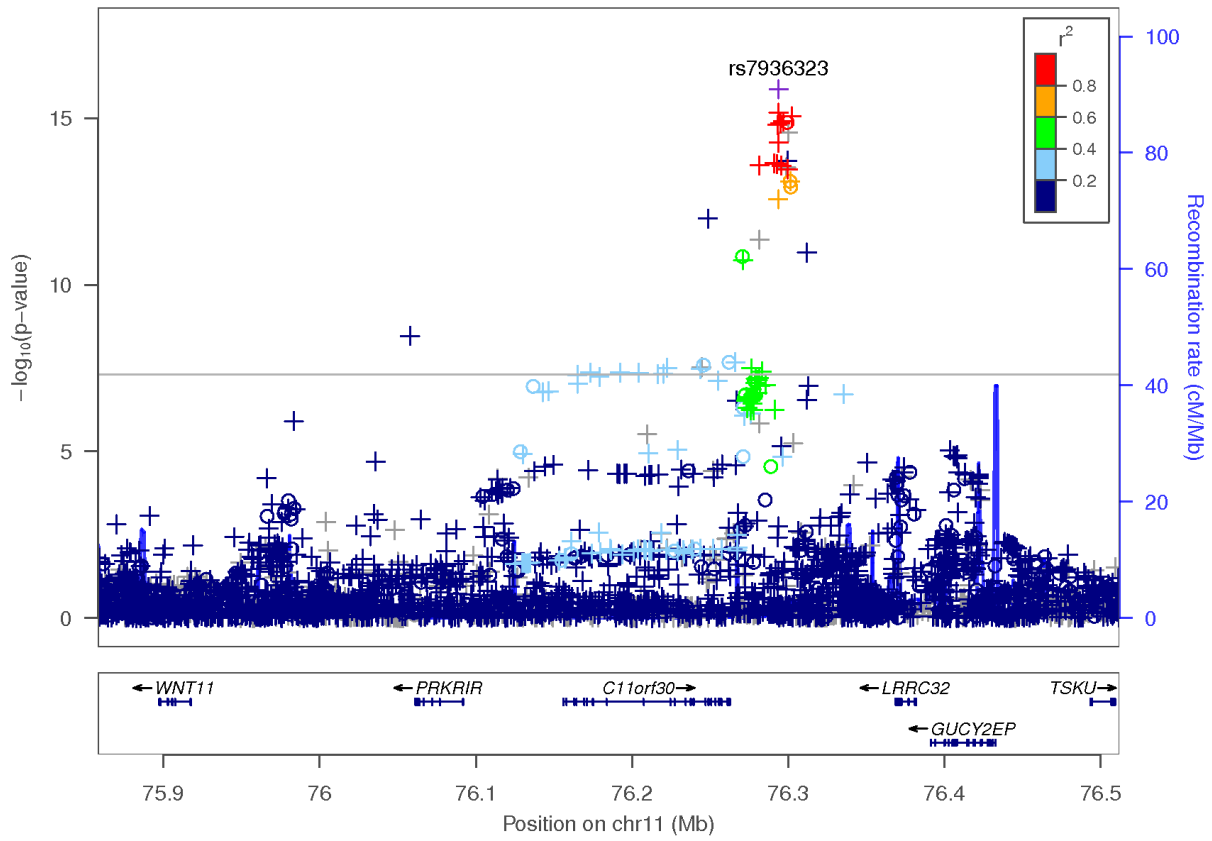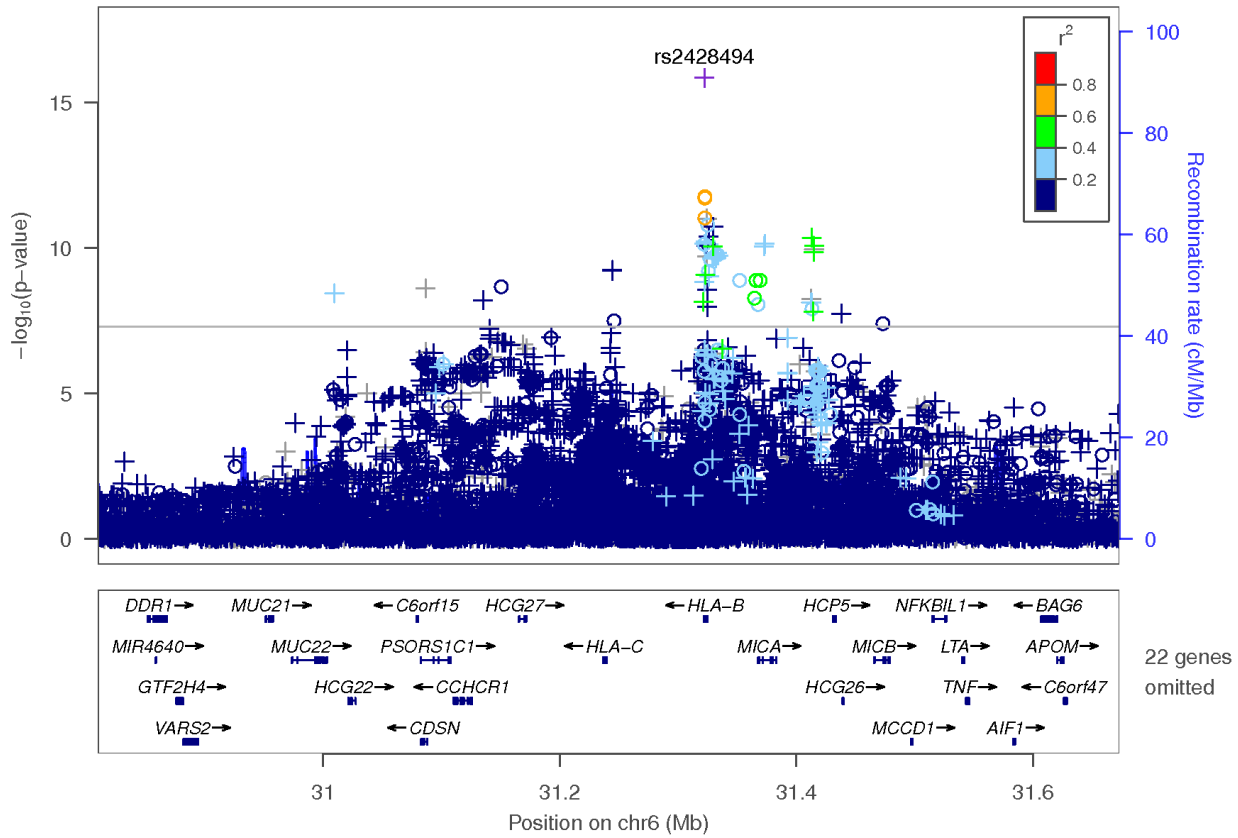

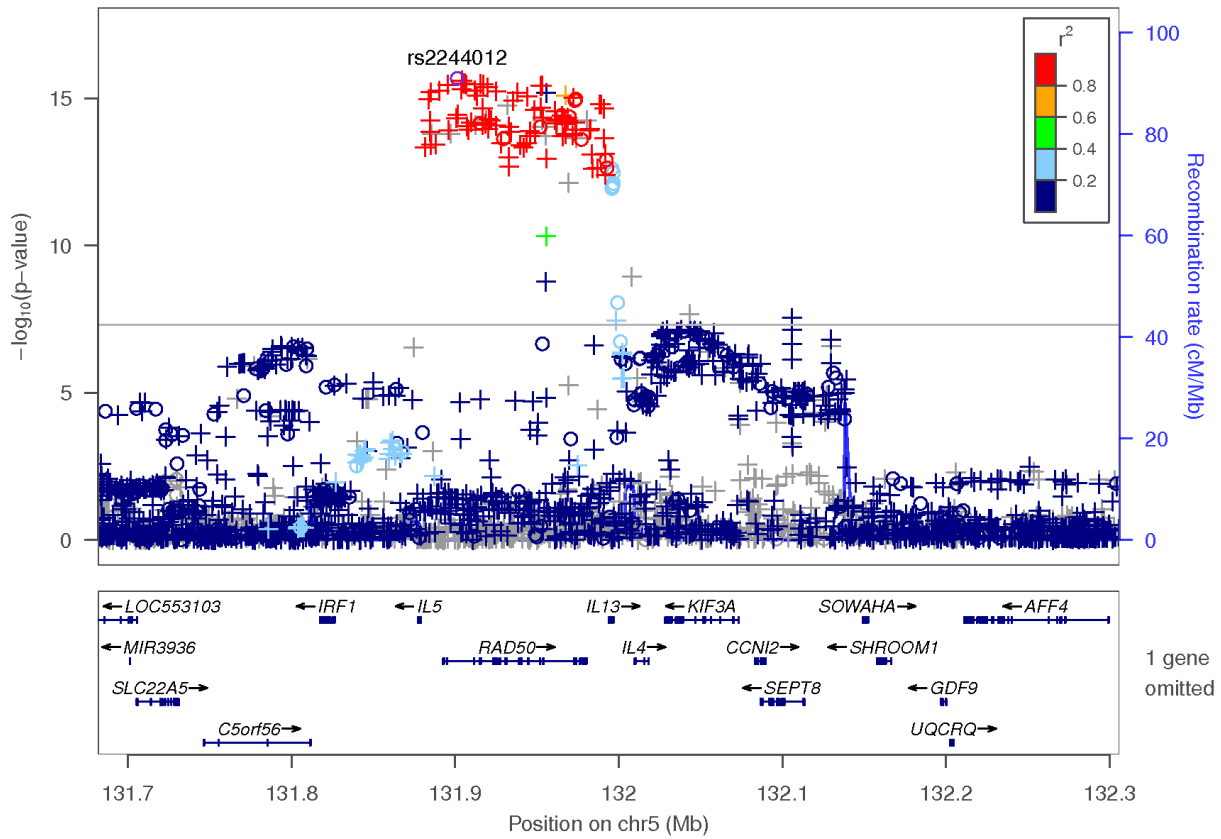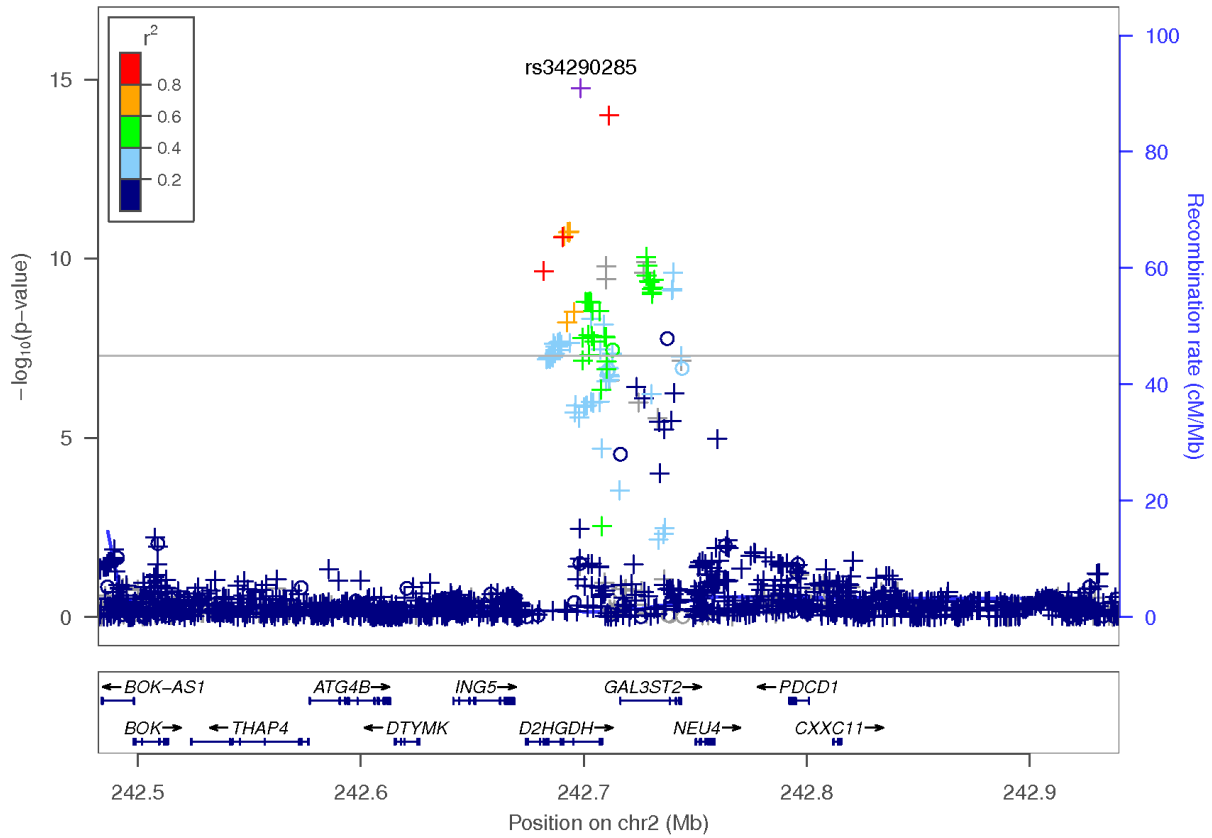

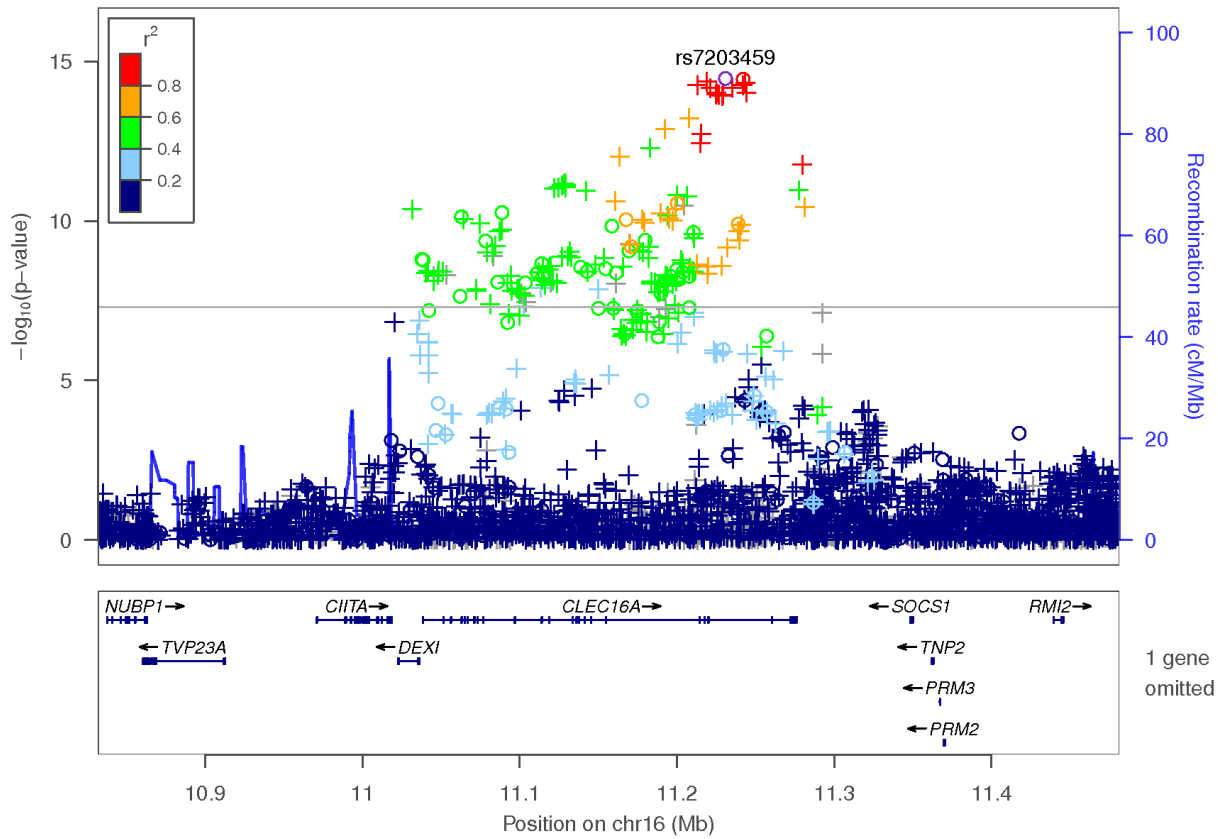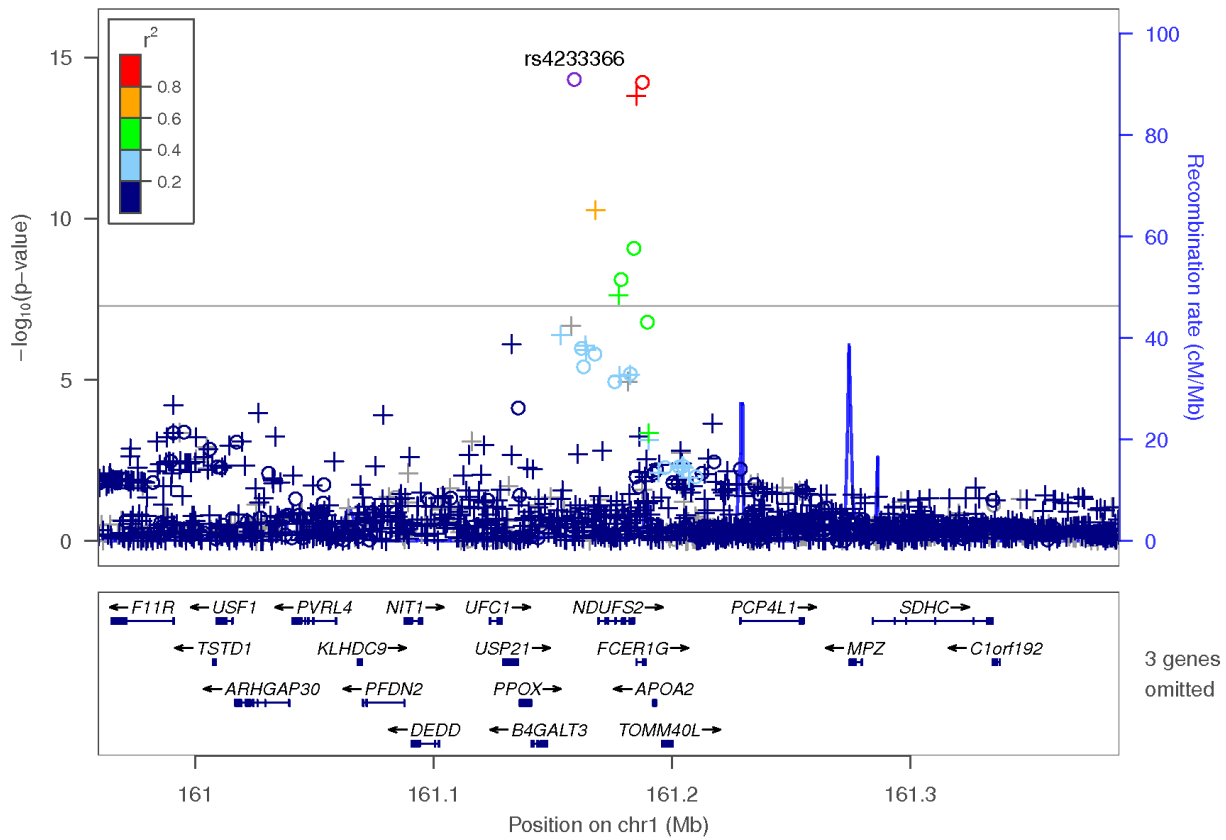

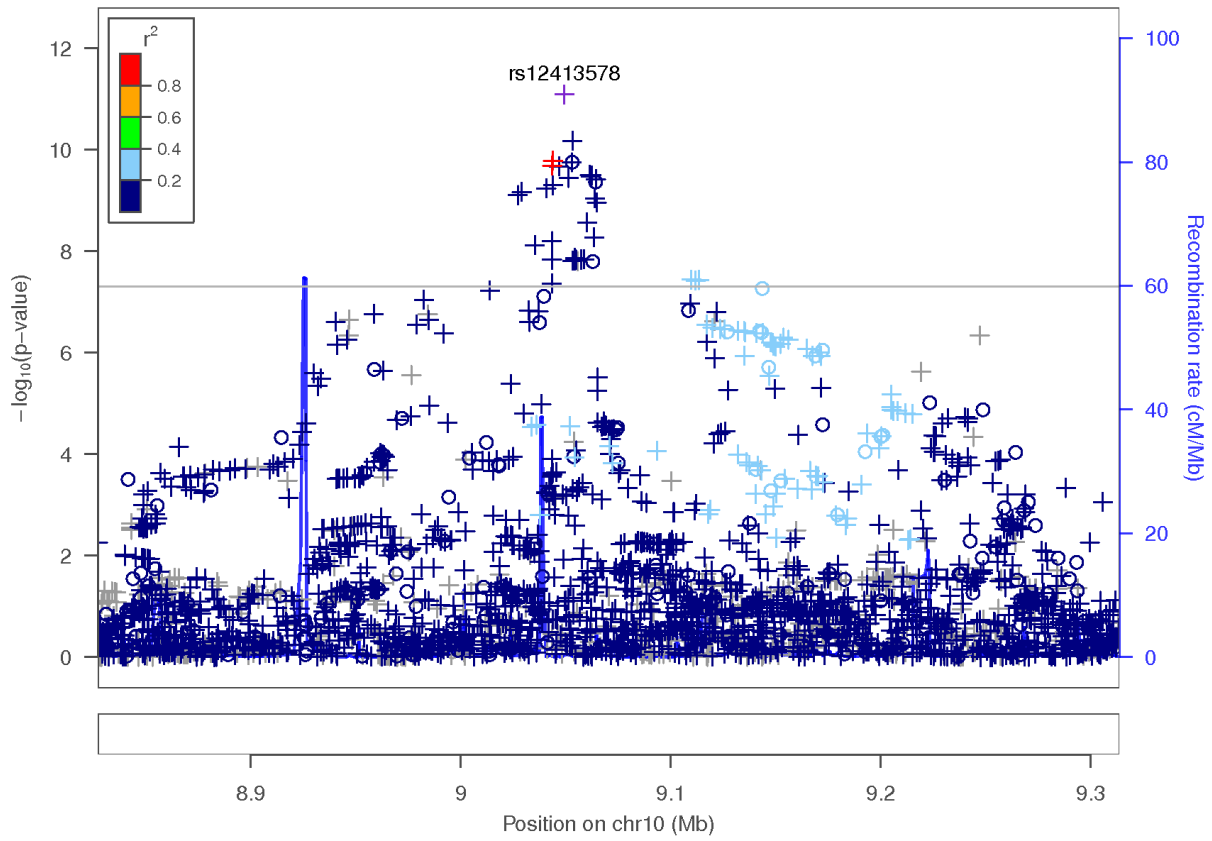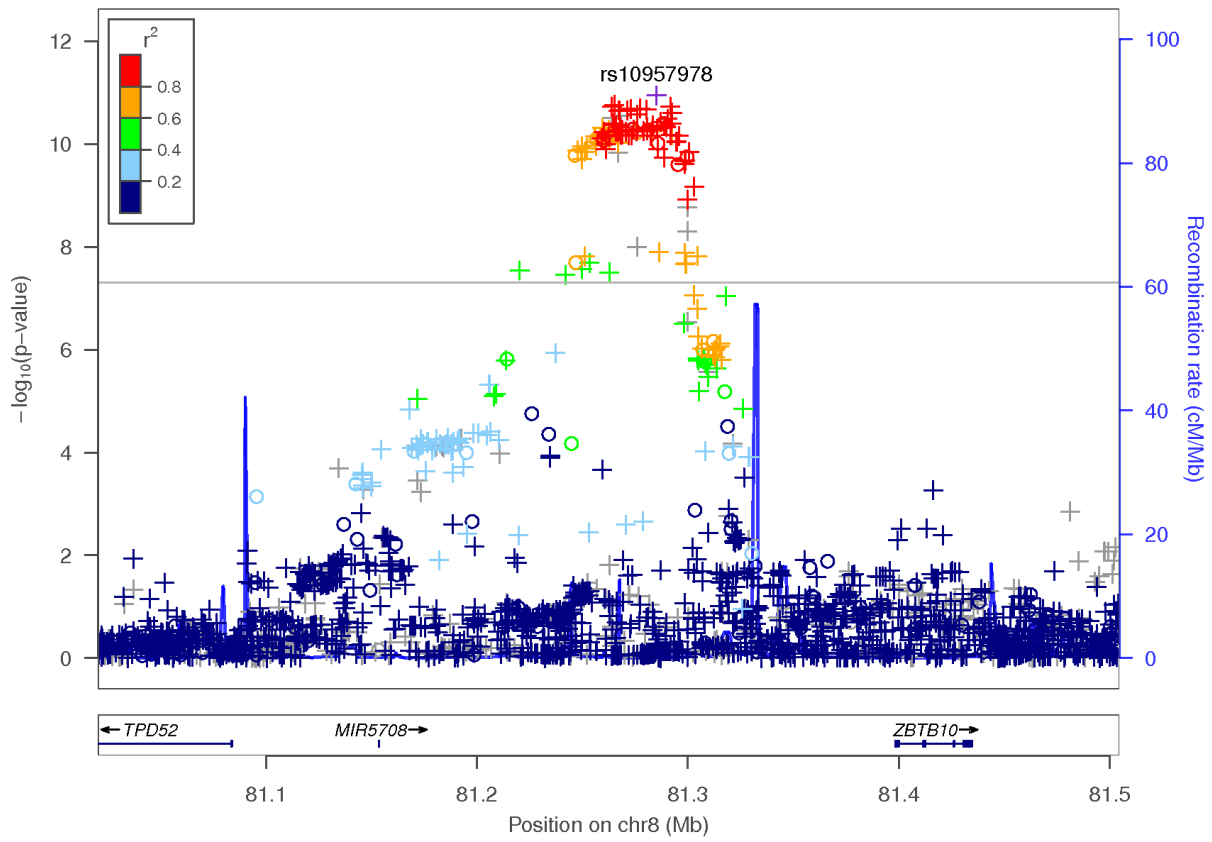

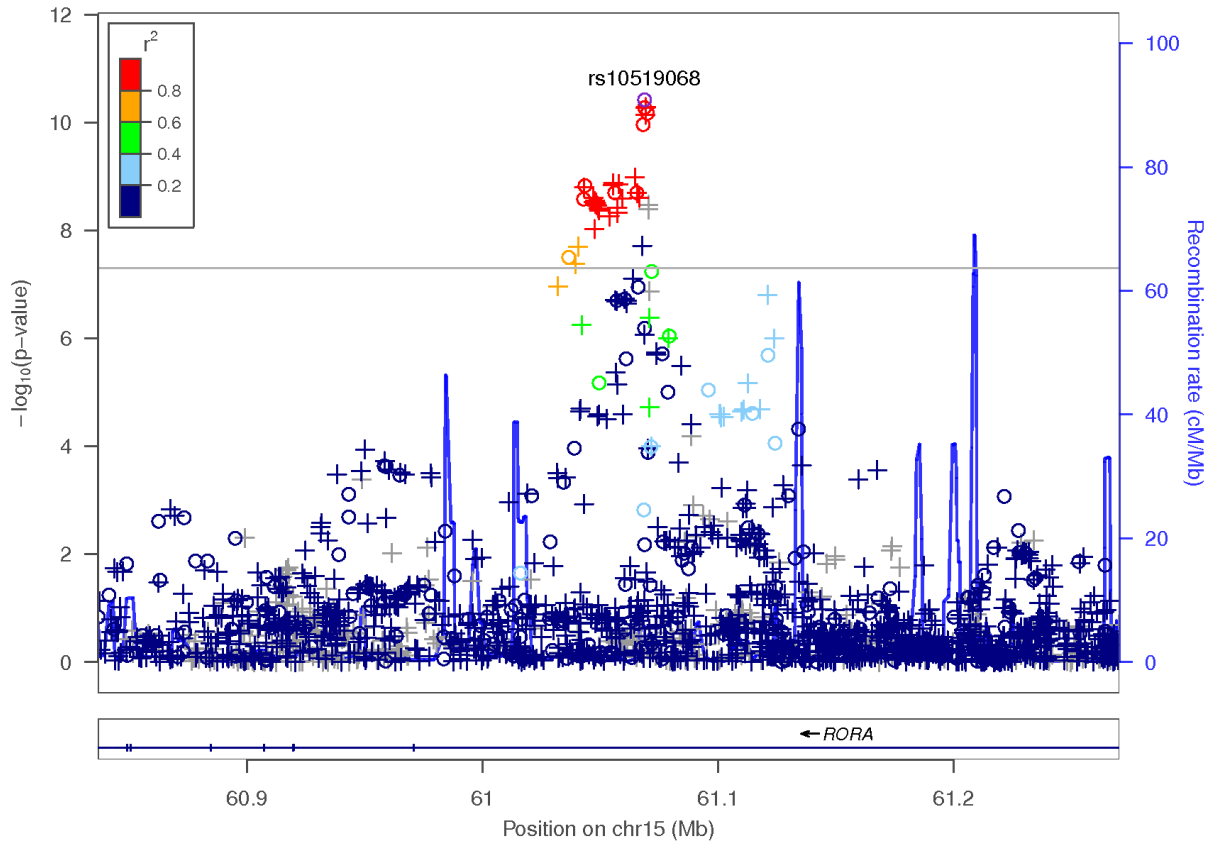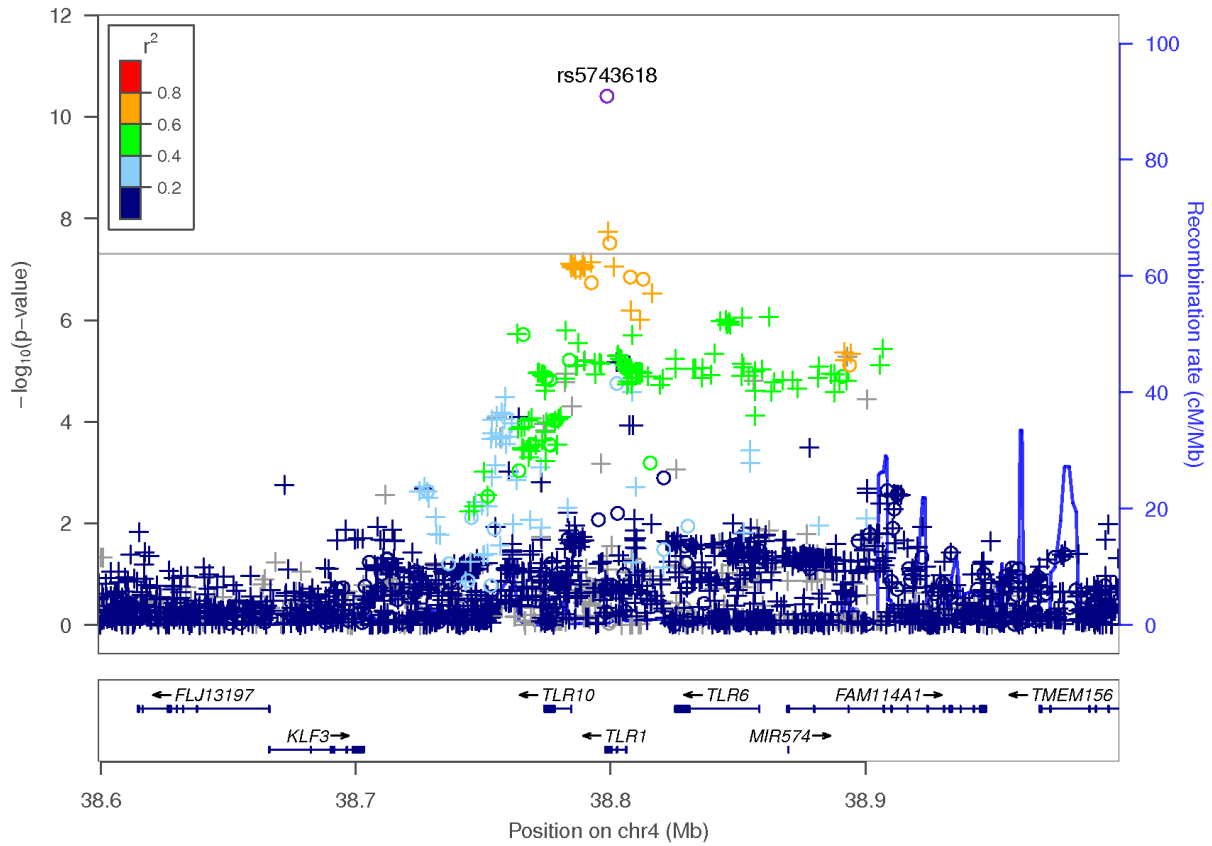

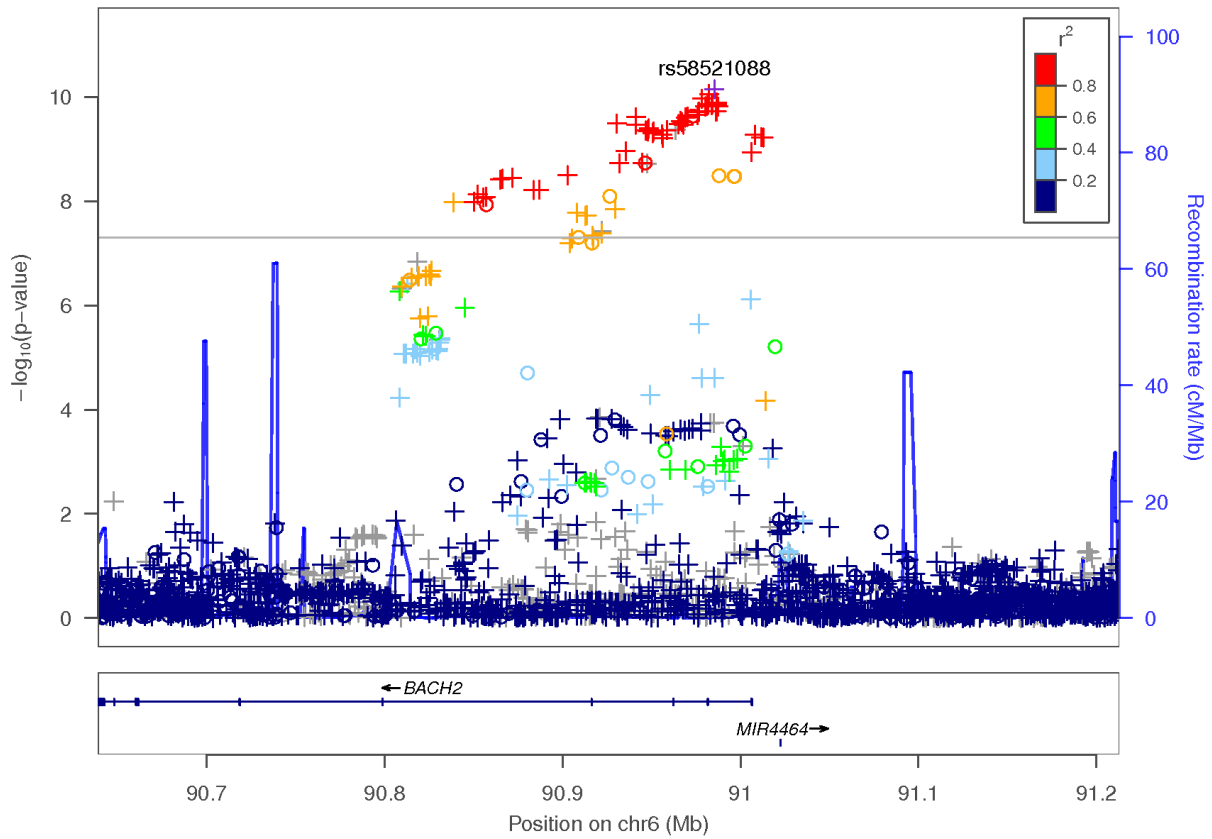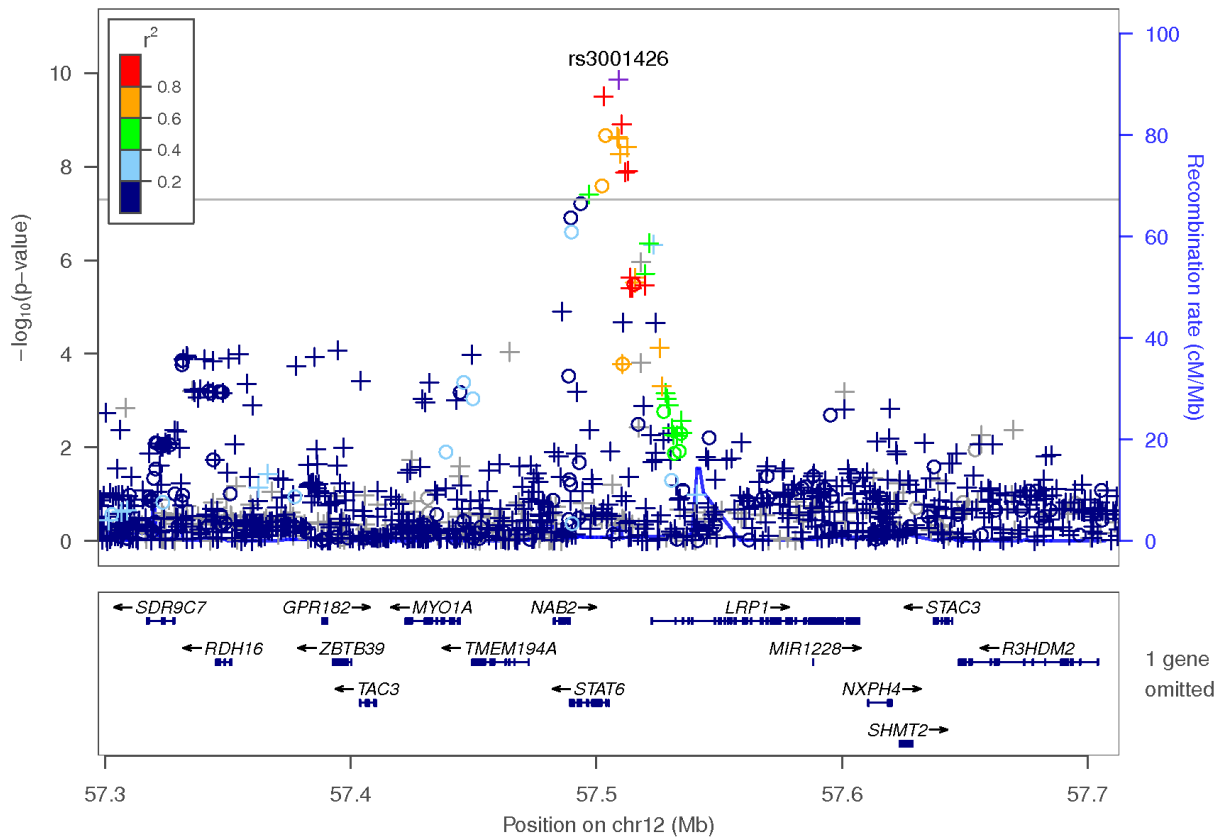



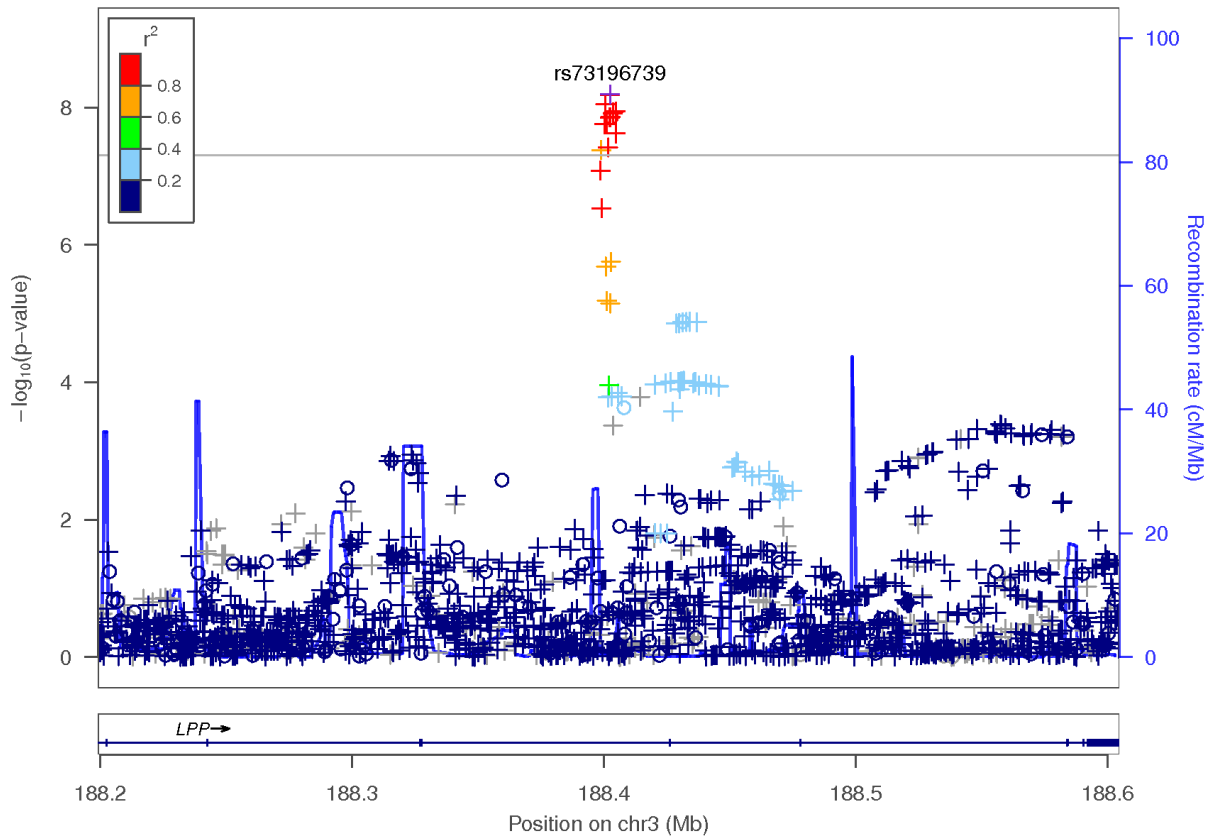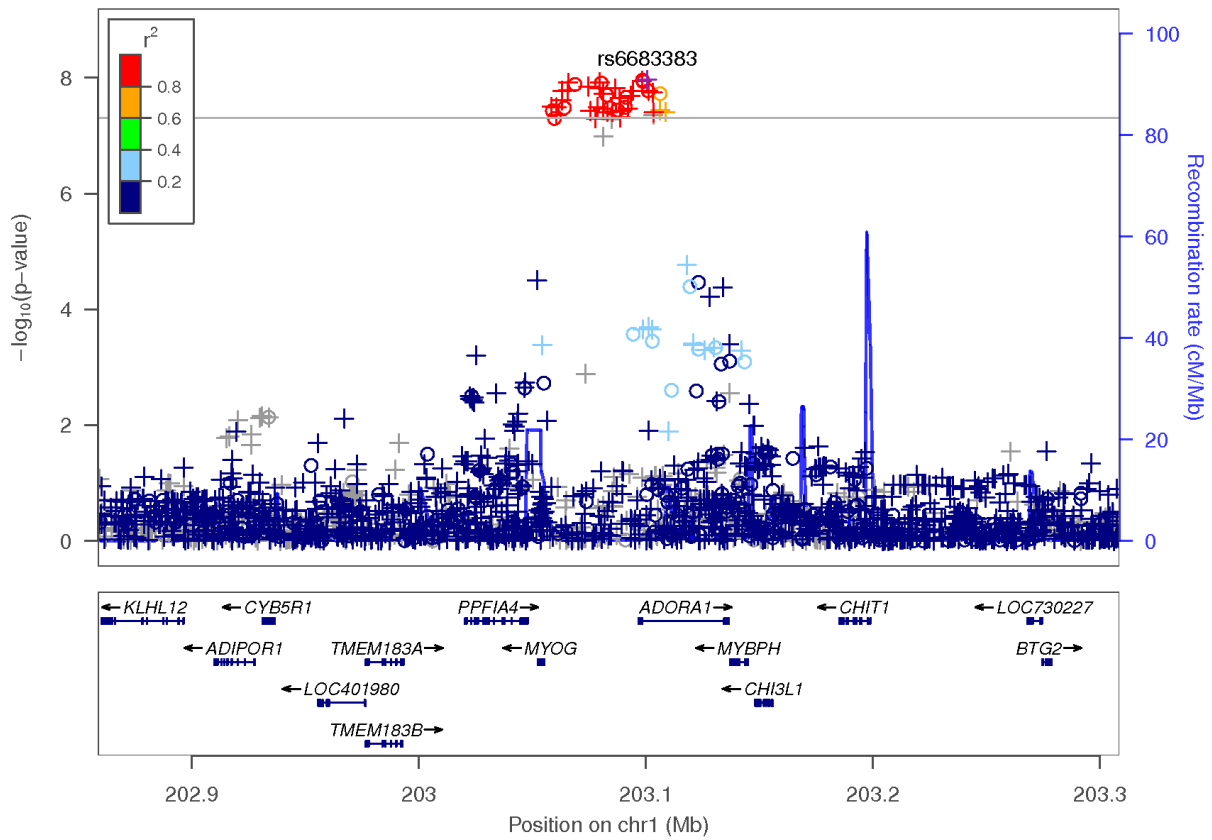

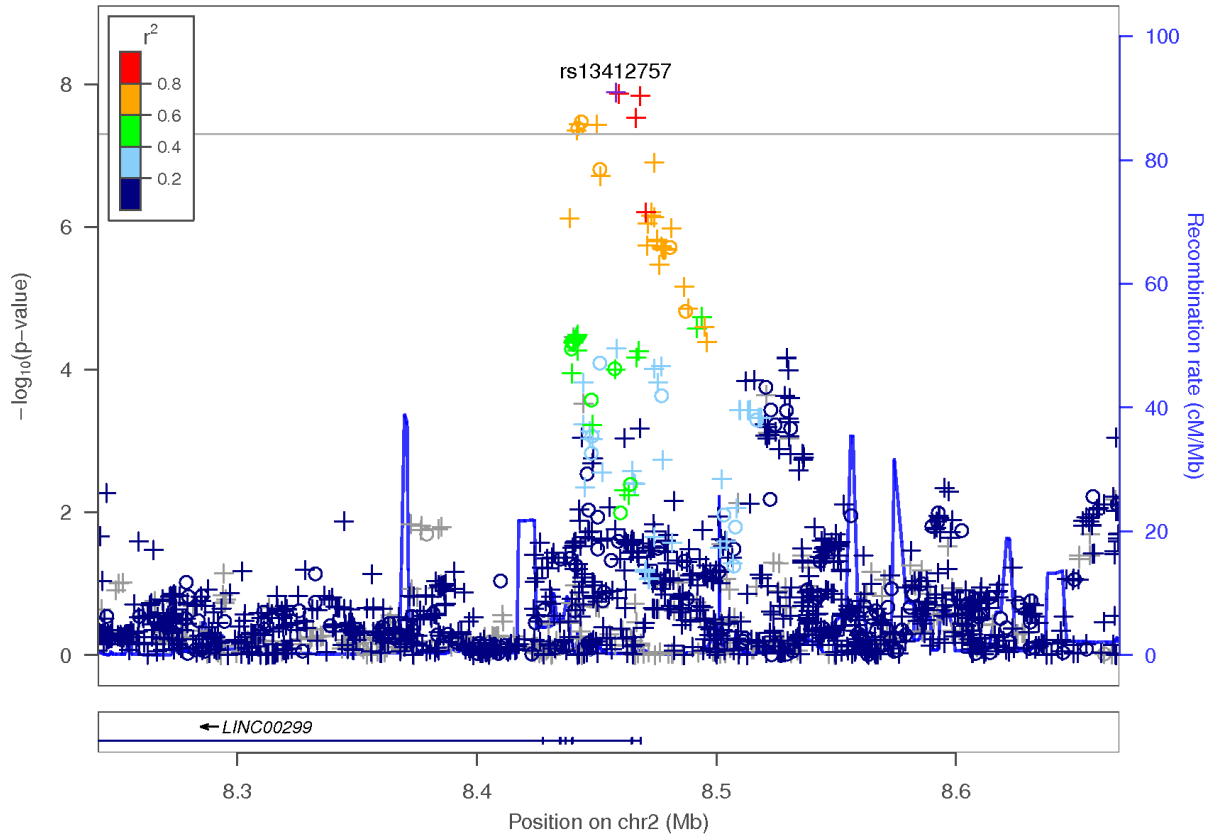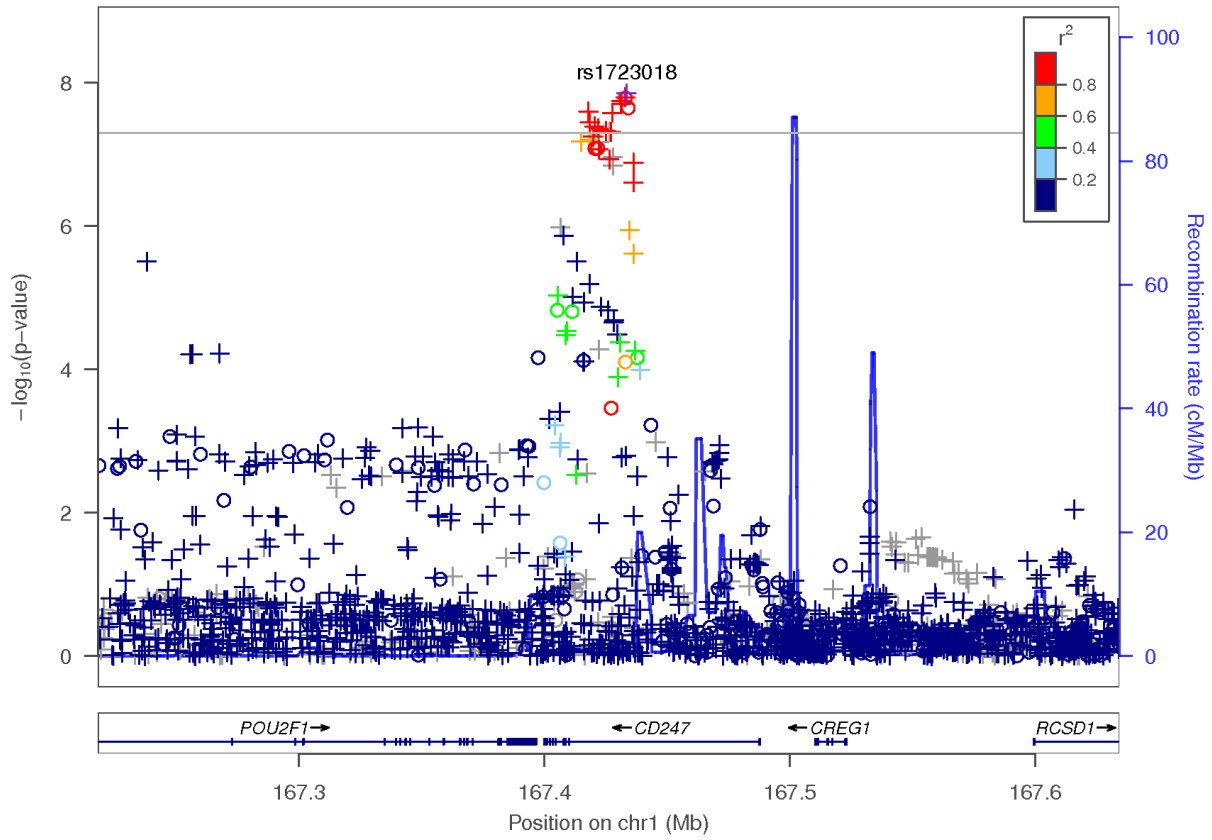

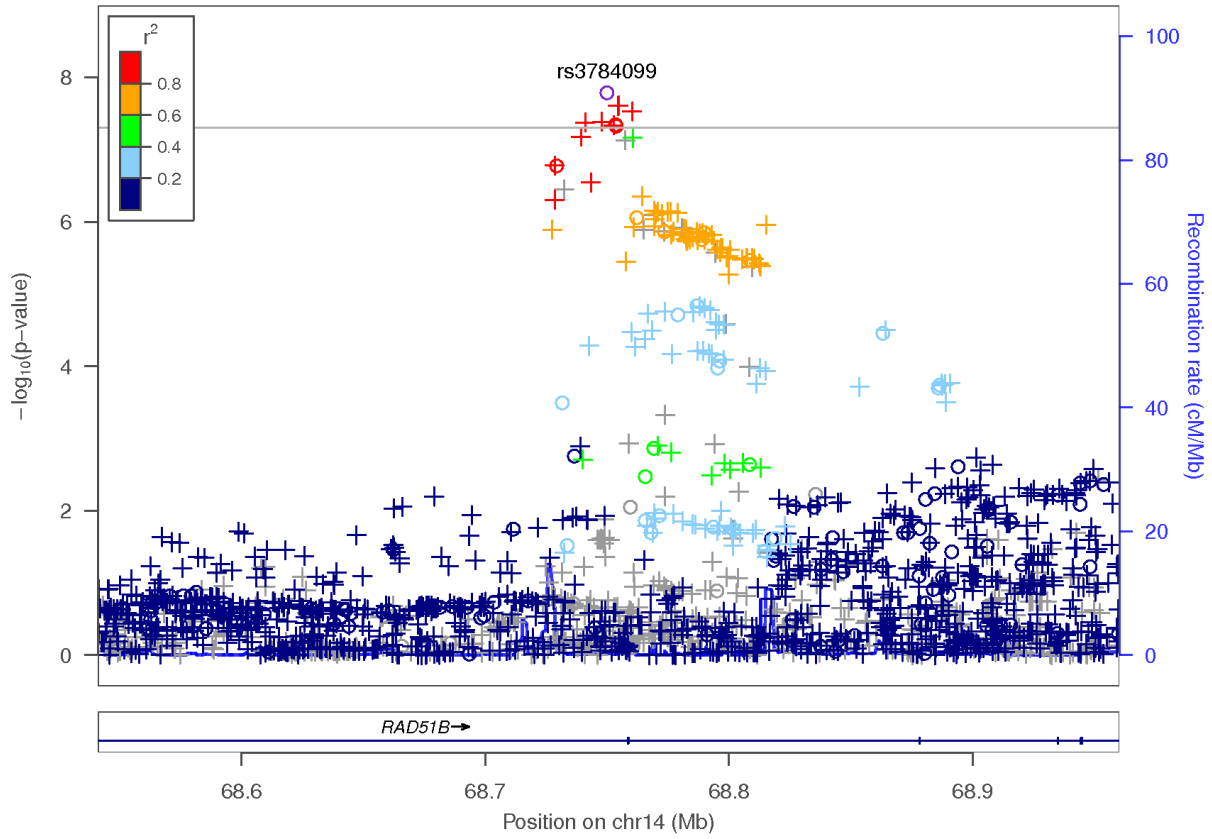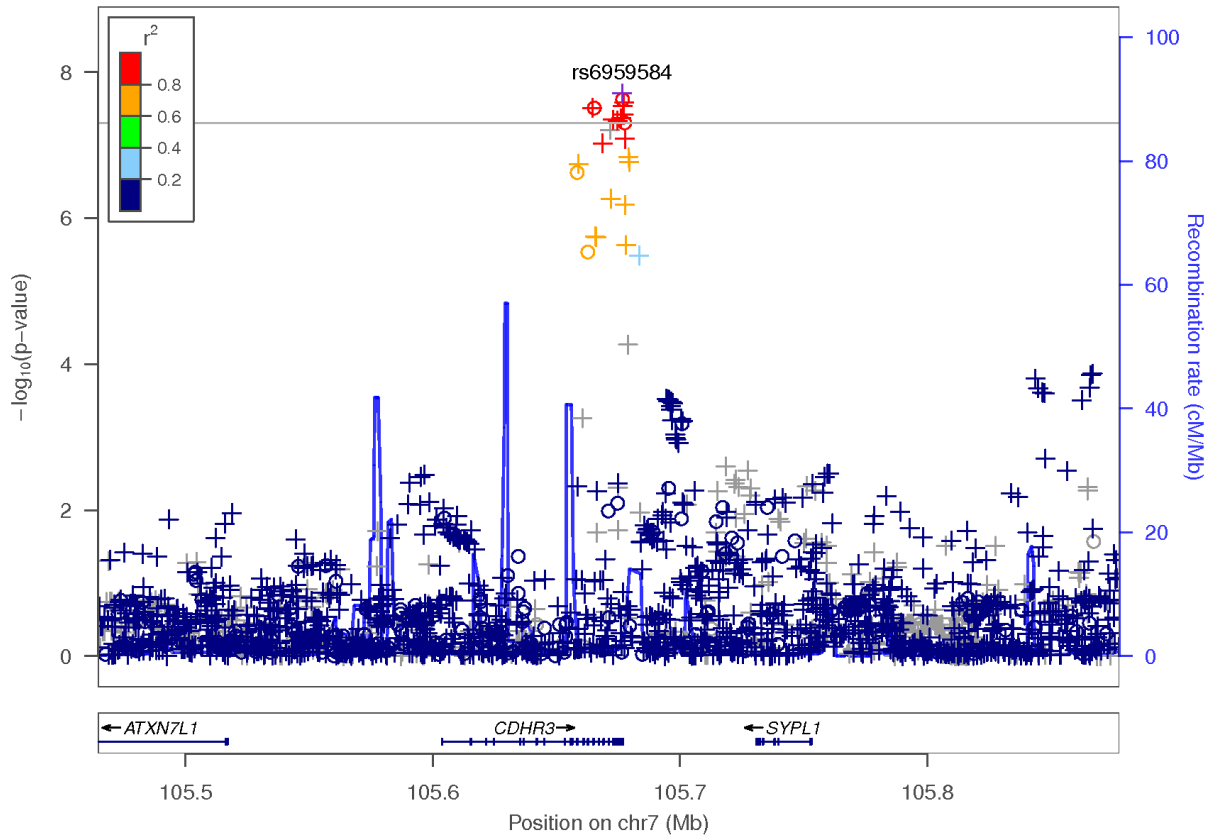

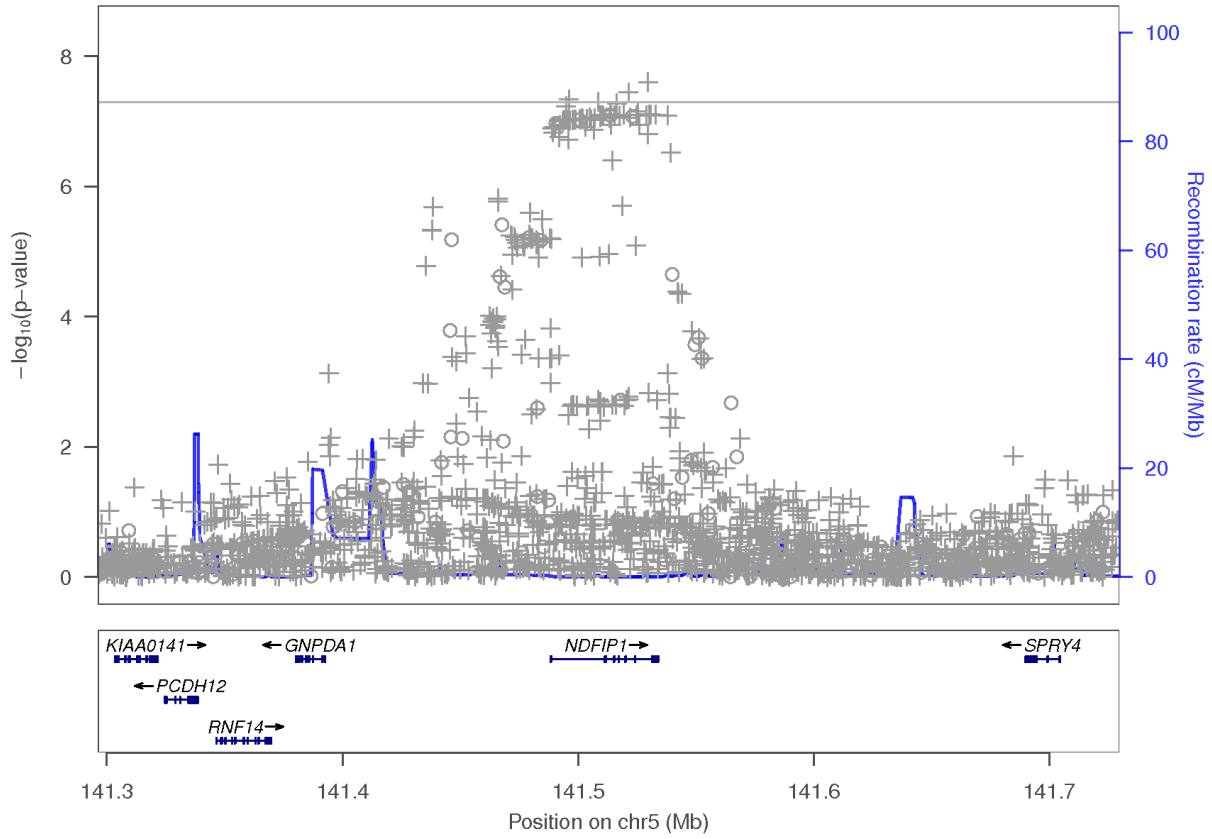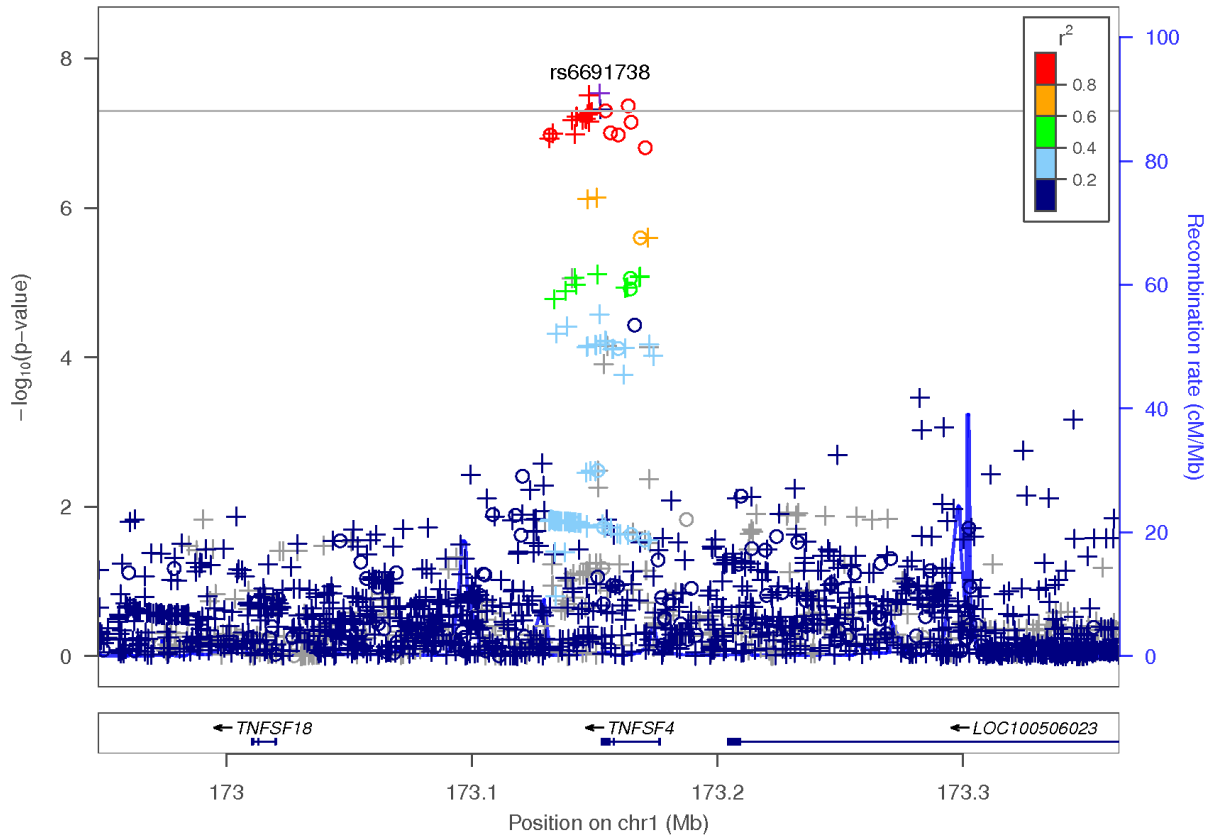

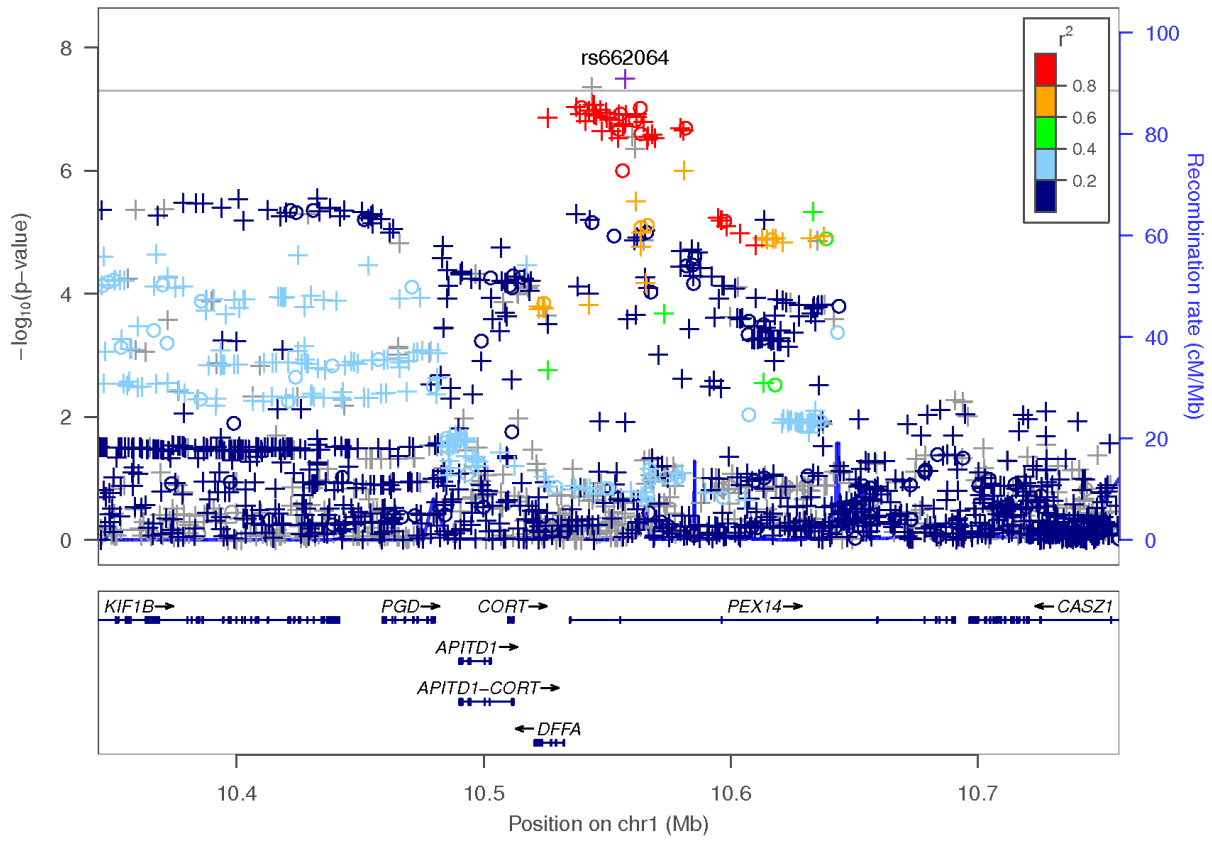

Supplement: NIHMS780506-supplement-6.pdf [file NIHMS780506-supplement-6.pdf]
