# Supplementary material
Source: PubMed Central journal article supplement (PMC5207801)

# Analysis Summary: Breast Size

---

## Phenotype Description

---

Quantitative trait looking at breast size (using bra cup size as a proxy) as defined by the following question:

- Physical Features ("What is your bra size? (Please report your bra size prior to any surgeries that affected that size of your breasts and prior to any pregnancies.)")

Respondents with a bra band size greater than 70 inches were excluded.

## Phenotype Statistics

---

The following table shows demographics of unrelated, European individuals included in the GWAS.

| Phenotype | Group | Total | M | F     | (0,30] | (30,45] | (45,60] | (60,Inf] |
|-----------|-------|-------|---|-------|--------|---------|---------|----------|
| cup_size  | [0,4] | 12995 | 0 | 12995 | 2137   | 3884    | 3439    | 3535     |
|           | (4,5] | 9408  | 0 | 9408  | 1208   | 2558    | 2660    | 2982     |
|           | (5,6] | 5591  | 0 | 5591  | 753    | 1442    | 1590    | 1806     |
|           | (6,9] | 5796  | 0 | 5796  | 765    | 1857    | 1635    | 1539     |

The following table shows the phenotypic distribution across 23andMe genotyping platforms for individuals included in the GWAS.

| Phenotype | Group | Total | v1/v2 | v3    | v4  |
|-----------|-------|-------|-------|-------|-----|
| cup_size  | [0,4] | 12995 | 1600  | 10778 | 617 |
|           | (4,5] | 9408  | 1113  | 7848  | 447 |
|           | (5,6] | 5591  | 652   | 4635  | 304 |
|           | (6,9] | 5796  | 618   | 4809  | 369 |

## Null Model with Covariates

---

The following table shows results of fitting a model for the trait based on just the covariates. Principal coordinates have been standardized, so these effect sizes are in units of standard deviations.

|      | Estimate | Std. Error | t value | Pr(> t )              |
|------|----------|------------|---------|-----------------------|
| age  | 0.00121  | 0.000517   | 2.3     | 0.020                 |
| pc.0 | -0.03893 | 0.008141   | -4.8    | $1.8 \times 10^{-6}$  |
| pc.1 | -0.06898 | 0.008176   | -8.4    | $3.4 \times 10^{-17}$ |
| pc.2 | -0.05233 | 0.008173   | -6.4    | $1.5 \times 10^{-10}$ |
| pc.3 | -0.01672 | 0.008140   | -2.1    | 0.040                 |
| pc.4 | 0.01108  | 0.008143   | 1.4     | 0.17                  |

## Q-Q plot of scaled residuals

---

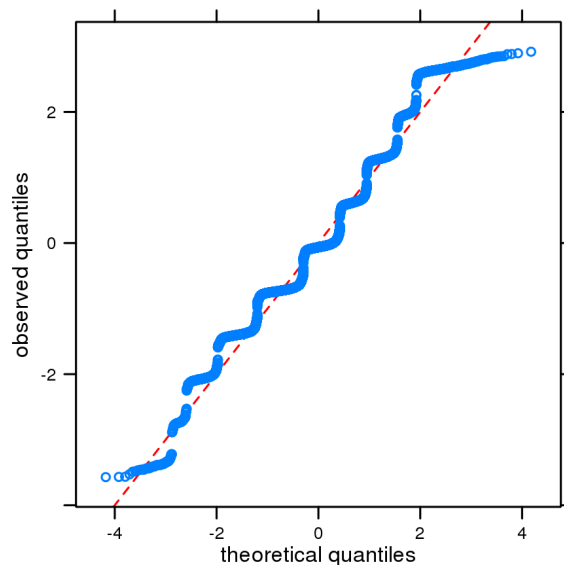

## SNP-level QC information

The following table shows results for QC filters on the genotyped data:

|                         | <b>failed</b> | <b>passed</b> |
|-------------------------|---------------|---------------|
| no filters              | 0             | 1030430       |
| not V1-only, chrM, chrY | 4790          | 1025640       |
| parent-offspring test   | 2129          | 1023511       |
| MAF > 0%                | 3203          | 1020494       |
| HWE > 1e-20             | 48225         | 972832        |
| gt.rate > 90%           | 30775         | 952826        |
| batch effects           | 28267         | 945446        |

The following table shows results for QC filters on the imputed dosage data:

|                    | <b>failed</b> | <b>passed</b> |
|--------------------|---------------|---------------|
| no filters         | 0             | 13733809      |
| MAF > 0%           | 0             | 13733809      |
| imputation quality | 0             | 13733809      |
| batch effects      | 2168          | 13731641      |

The following table shows results for QC filters on the merged association test results:

|                | <b>passed</b> | <b>total</b> |
|----------------|---------------|--------------|
| imputed only   | 12833621      | 12833621     |
| both passed    | 898002        | 13731623     |
| genotyped only | 47444         | 13779067     |
| no test result | -23179        | 13755888     |
| MAF < 0.1%     | -1716401      | 12039487     |

## Genetic Association Tests

We performed linear regression assuming an additive model for allelic effects, using the model:

$$cup\_size \sim age + pc.0 + pc.1 + pc.2 + pc.3 + pc.4 + genotype$$

This genome-wide association analysis includes data from 33790 individuals of European ancestry, filtered to remove close relatives.

The results in this report have been adjusted for a genomic control inflation factor  $\lambda=1.085$ . The equivalent inflation factor rescaled for a sample size of 2000 would be  $\lambda_{2000}=1.005$ , and for 20000,  $\lambda_{20000}=1.051$ .

## Manhattan Plot

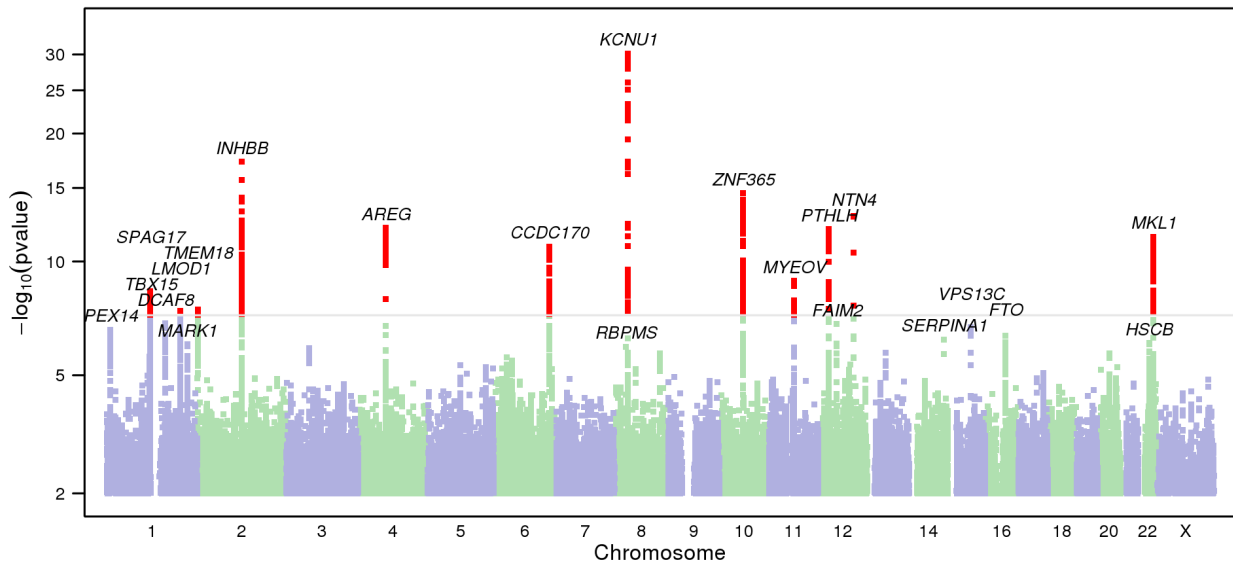

## Q-Q Plot of GWAS Results

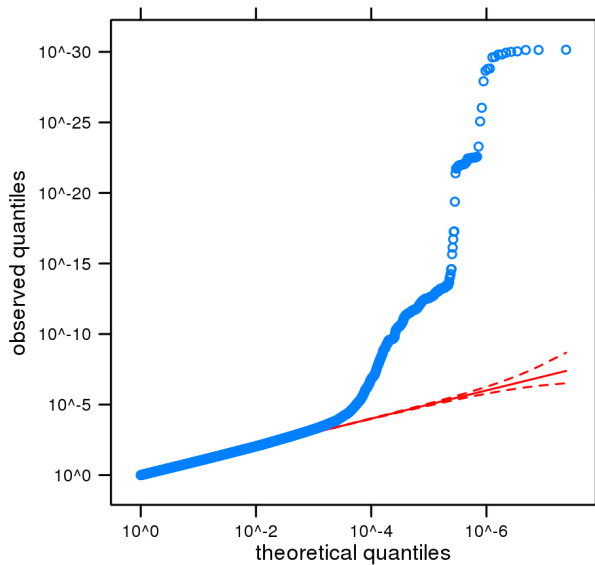

## Index SNPs for Strongest Associations

| cytoband | assay.name  | scaffold | position  | alleles | src | pvalue                | effect | 95% CI          | gene.context        |
|----------|-------------|----------|-----------|---------|-----|-----------------------|--------|-----------------|---------------------|
| 8p11.23  | rs10110651  | chr8     | 36847115  | C/T     | I   | $7.1 \times 10^{-31}$ | 0.177  | [0.147,0.207]   | KCNU1--[---ZNF703   |
| 2q14.2   | rs17625845  | chr2     | 121089731 | C/T     | I   | $5.6 \times 10^{-18}$ | -0.140 | [-0.171,-0.108] | RALB--[---INHBB     |
| 10q21.2  | rs3081227   | chr10    | 64178657  | D/I     | I   | $2.5 \times 10^{-15}$ | -0.103 | [-0.129,-0.078] | [ZNF365]            |
| 12q22    | rs17356907  | chr12    | 96027759  | A/G     | I   | $1.3 \times 10^{-13}$ | 0.097  | [0.071,0.123]   | USP44--[---NTN4     |
| 4q13.3   | rs7659874   | chr4     | 75547013  | A/G     | I   | $8.6 \times 10^{-13}$ | -0.105 | [-0.134,-0.076] | AREG--[---BTC       |
| 12p11.22 | rs1838564   | chr12    | 28154895  | A/G     | I   | $1.0 \times 10^{-12}$ | 0.136  | [0.099,0.174]   | PTHLH--[---CCDC91   |
| 22q13.1  | rs5995875   | chr22    | 40960692  | C/T     | I   | $3.2 \times 10^{-12}$ | -0.137 | [-0.176,-0.099] | [MKL1]              |
| 6q25.1   | rs9397437   | chr6     | 151952332 | A/G     | I   | $1.3 \times 10^{-11}$ | -0.158 | [-0.204,-0.112] | CCDC170--[---ESR1   |
| 11q13.3  | rs7102705   | chr11    | 69143284  | A/G     | I   | $1.1 \times 10^{-9}$  | -0.089 | [-0.118,-0.061] | MYEOV--[---CCND1    |
| 1p12     | rs2359714   | chr1     | 118770271 | C/T     | I   | $3.8 \times 10^{-9}$  | 0.071  | [0.047,0.095]   | SPAG17--[---TBX15   |
| 2p25.3   | rs62105303  | chr2     | 632922    | A/G     | I   | $2.8 \times 10^{-8}$  | -0.086 | [-0.117,-0.056] | FAM150B--[---TMEM18 |
| 1q32.1   | rs34091558  | chr1     | 201886769 | D/I     | I   | $3.1 \times 10^{-8}$  | -0.072 | [-0.098,-0.047] | [LMOD1]             |
| 1p12     | rs2645288   | chr1     | 119500483 | C/G     | I   | $1.1 \times 10^{-7}$  | -0.077 | [-0.105,-0.049] | [TBX15]             |
| 1q23.2   | rs6427508   | chr1     | 160238857 | C/T     | I   | $1.1 \times 10^{-7}$  | -0.067 | [-0.092,-0.042] | DCAF8--[---COPA     |
| 12q13.12 | rs3205718   | chr12    | 50261809  | C/T     | I   | $1.2 \times 10^{-7}$  | 0.067  | [0.042,0.092]   | [FAIM2]             |
| 15q22.2  | rs148713408 | chr15    | 62220772  | C/T     | I   | $1.6 \times 10^{-7}$  | 0.339  | [0.212,0.466]   | [VPS13C]            |
| 1p36.22  | rs616402    | chr1     | 10566272  | C/T     | I   | $2.0 \times 10^{-7}$  | -0.067 | [-0.093,-0.042] | [PEX14]             |
| 16q12.2  | rs62033406  | chr16    | 53824226  | A/G     | I   | $3.7 \times 10^{-7}$  | 0.062  | [0.038,0.087]   | [FTO]               |
| 14q32.13 | rs28929474  | chr14    | 94844947  | C/T     | I   | $5.1 \times 10^{-7}$  | -0.215 | [-0.299,-0.131] | [SERPINA1]          |
| 22q12.1  | rs5752793   | chr22    | 29160314  | A/G     | I   | $6.9 \times 10^{-7}$  | 0.065  | [0.039,0.090]   | HSCB--[---CCDC117   |

|      |             |      |           |     |   |                      |        |                 |                     |
|------|-------------|------|-----------|-----|---|----------------------|--------|-----------------|---------------------|
| 1q41 | rs200550907 | chr1 | 220701165 | D/I | I | $7.9 \times 10^{-7}$ | -0.077 | [-0.107,-0.046] | RAB3GAP2---[ ]MARK1 |
| 8p12 | rs113198678 | chr8 | 30241618  | C/T | I | $9.7 \times 10^{-7}$ | -0.120 | [-0.169,-0.072] | DCTN6---[ ]RBPM5    |

## Quality Statistics for Index SNPs

| assay.name  | is.v2 | is.v3 | is.v4 | gt.rate | hw.p.value             | p.date | freq.b | avg.rsqr | min.rsqr | p.batch               | dose.b | qc.mask |
|-------------|-------|-------|-------|---------|------------------------|--------|--------|----------|----------|-----------------------|--------|---------|
| rs10110651  | FALSE | FALSE | FALSE |         |                        |        |        | 0.9989   | 0.9962   | 0.055                 | 0.8062 | v2v3v4  |
| rs17625845  | FALSE | TRUE  | TRUE  | 0.9981  | 0.071                  | 0.21   | 0.7998 | 0.9723   | 0.7026   | $1.6 \times 10^{-50}$ | 0.8018 | v3v4    |
| rs3081227   | FALSE | FALSE | FALSE |         |                        |        |        | 0.9143   | 0.9033   | 0.047                 | 0.6335 | v2v3v4  |
| rs17356907  | TRUE  | TRUE  | TRUE  | 0.9999  | 0.65                   | 0.39   | 0.2962 | 0.9977   | 0.9959   | 0.77                  | 0.2959 | v2v3v4  |
| rs7659874   | TRUE  | TRUE  | TRUE  | 0.9996  | 0.047                  | 0.46   | 0.2111 | 0.9989   | 0.9973   | 0.56                  | 0.2108 | v2v3v4  |
| rs1838564   | FALSE | FALSE | FALSE |         |                        |        |        | 0.9946   | 0.9746   | 0.038                 | 0.8912 | v2v3v4  |
| rs5995875   | FALSE | FALSE | FALSE |         |                        |        |        | 0.9977   | 0.9951   | 0.72                  | 0.1047 | v2v3v4  |
| rs9397437   | FALSE | FALSE | FALSE |         |                        |        |        | 0.9985   | 0.9865   | 0.018                 | 0.9276 | v2v3v4  |
| rs7102705   | TRUE  | TRUE  | TRUE  | 0.9956  | 0.010                  | 0.31   | 0.7921 | 0.9998   | 0.9989   | 0.010                 | 0.7918 | v2v3v4  |
| rs2359714   | FALSE | FALSE | FALSE |         |                        |        |        | 0.9902   | 0.9768   | 0.19                  | 0.5057 | v2v3v4  |
| rs62105303  | FALSE | FALSE | FALSE |         |                        |        |        | 0.9829   | 0.9721   | 0.21                  | 0.1845 | v2v3v4  |
| rs34091558  | FALSE | FALSE | FALSE |         |                        |        |        | 0.9811   | 0.9695   | $2.9 \times 10^{-5}$  | 0.6952 | v2v3v4  |
| rs2645288   | FALSE | FALSE | FALSE |         |                        |        |        | 0.9161   | 0.9025   | 0.0078                | 0.2510 | v2v3v4  |
| rs6427508   | FALSE | FALSE | FALSE |         |                        |        |        | 0.9106   | 0.9006   | 0.11                  | 0.4723 | v2v3v4  |
| rs3205718   | FALSE | FALSE | FALSE |         |                        |        |        | 0.9544   | 0.9272   | $4.4 \times 10^{-5}$  | 0.3818 | v2v3v4  |
| rs148713408 | FALSE | FALSE | FALSE |         |                        |        |        | 0.6675   | 0.6126   | 0.012                 | 0.0125 | v2v3v4  |
| rs616402    | FALSE | FALSE | FALSE |         |                        |        |        | 0.9992   | 0.9982   | 0.19                  | 0.3061 | v2v3v4  |
| rs62033406  | FALSE | FALSE | FALSE |         |                        |        |        | 0.9910   | 0.9897   | 0.68                  | 0.4166 | v2v3v4  |
| rs28929474  | TRUE  | TRUE  | TRUE  | 0.9999  | 0.26                   | 0.0027 | 0.0177 | 0.9960   | 0.9933   | 0.12                  | 0.0176 | v2v3v4  |
| rs5752793   | FALSE | TRUE  | FALSE | 0.9989  | $2.2 \times 10^{-149}$ | 0.023  | 0.3008 | 0.9838   | 0.9681   | $1.1 \times 10^{-7}$  | 0.3048 | v2v3v4  |
| rs200550907 | FALSE | FALSE | FALSE |         |                        |        |        | 0.9236   | 0.9169   | 0.058                 | 0.2076 | v2v3v4  |
| rs113198678 | FALSE | FALSE | FALSE |         |                        |        |        | 0.7897   | 0.7525   | 0.0026                | 0.0797 | v2v3v4  |

## SNP Statistics in the GWAS Sample

| assay.name  | AA.0  | AB.0  | BB.0  | im.num.0 | dose.b.0 |
|-------------|-------|-------|-------|----------|----------|
| rs10110651  |       |       |       | 33790    | 0.8111   |
| rs17625845  | 1179  | 9451  | 19141 | 29530    | 0.8015   |
| rs3081227   |       |       |       | 33790    | 0.6352   |
| rs17356907  | 16678 | 14098 | 3010  | 33790    | 0.2981   |
| rs7659874   | 20998 | 11283 | 1499  | 33790    | 0.2113   |
| rs1838564   |       |       |       | 33790    | 0.8894   |
| rs5995875   |       |       |       | 33790    | 0.1036   |
| rs9397437   |       |       |       | 33790    | 0.9284   |
| rs7102705   | 1502  | 11095 | 20971 | 33790    | 0.7896   |
| rs2359714   |       |       |       | 33790    | 0.5133   |
| rs62105303  |       |       |       | 33790    | 0.1850   |
| rs34091558  |       |       |       | 33790    | 0.6874   |
| rs2645288   |       |       |       | 33790    | 0.2493   |
| rs6427508   |       |       |       | 33790    | 0.4727   |
| rs3205718   |       |       |       | 33790    | 0.3832   |
| rs148713408 |       |       |       | 33790    | 0.0126   |
| rs616402    |       |       |       | 33790    | 0.3069   |
| rs62033406  |       |       |       | 33790    | 0.4054   |
| rs28929474  | 32457 | 1316  | 15    | 33790    | 0.0199   |
| rs5752793   | 14093 | 11141 | 2809  | 33790    | 0.2988   |
| rs200550907 |       |       |       | 33790    | 0.2041   |
| rs113198678 |       |       |       | 33790    | 0.0808   |

## Annotations from NHGRI GWAS Catalog

The following table shows, for each index SNP, all entries in the NHGRI GWAS Catalog that are within 500kb and in at least moderate linkage disequilibrium ( $r^2 > 0.5$ ).

| region   | position  | our.name   | our.pval              | dist   | rsqr  | assay.name | pvalue                | pubmed.id | trait                                                   | genes                  |
|----------|-----------|------------|-----------------------|--------|-------|------------|-----------------------|-----------|---------------------------------------------------------|------------------------|
| 8p11.23  | 36847115  | rs10110651 | $7.1 \times 10^{-31}$ | -1006  | 1.000 | rs7816345  | $2.0 \times 10^{-14}$ | 22747683  | Breast size                                             | ZNF703,MRPS7P1,KCNU1   |
| 2q14.2   | 121089731 | rs17625845 | $5.6 \times 10^{-18}$ | 0      | 1.000 | rs17625845 | $5.0 \times 10^{-10}$ | 22747683  | Breast size                                             | INHBB                  |
| 10q21.2  | 64178657  | rs3081227  | $2.5 \times 10^{-15}$ | 8907   | 0.706 | rs7089814  | $3.0 \times 10^{-9}$  | 22747683  | Breast size                                             | ZNF365, ALDH7A1P4, ADO |
| 12q22    | 96027759  | rs17356907 | $1.3 \times 10^{-13}$ | 0      | 1.000 | rs17356907 | $9.0 \times 10^{-6}$  | 23535733  | Breast cancer                                           | NTN4                   |
| 12q22    | 96027759  | rs17356907 | $1.3 \times 10^{-13}$ | 0      | 1.000 | rs17356907 | $2.0 \times 10^{-22}$ | 23535729  | Breast cancer                                           | NTN4                   |
| 12q22    | 96027759  | rs17356907 | $1.3 \times 10^{-13}$ | 0      | 1.000 | rs17356907 | $1.0 \times 10^{-6}$  | 22747683  | Breast size                                             | NEDD1, MIR135A2        |
| 4q13.3   | 75547013  | rs7659874  | $8.6 \times 10^{-13}$ | -44526 | 0.630 | rs62314947 | $5.0 \times 10^{-8}$  | 22747683  | Breast size<br>Breast Cancer in BRCA1 mutation carriers | AREG, EREG, ...        |
| 12p11.22 | 28154895  | rs1838564  | $1.0 \times 10^{-12}$ | 185    | 0.970 | rs10771399 | $8.0 \times 10^{-6}$  | 23544013  | Breast cancer                                           | Intergenic             |
| 12p11.22 | 28154895  | rs1838564  | $1.0 \times 10^{-12}$ | 185    | 0.970 | rs10771399 | $2.0 \times 10^{-12}$ | 23535733  | Breast cancer                                           | PTHLH                  |
| 12p11.22 | 28154895  | rs1838564  | $1.0 \times 10^{-12}$ | 185    | 0.970 | rs10771399 | $8.0 \times 10^{-31}$ | 23535729  | Breast cancer                                           | PTHLH                  |
| 12p11.22 | 28154895  | rs1838564  | $1.0 \times 10^{-12}$ | 1186   | 0.777 | rs12371778 | $1.0 \times 10^{-8}$  | 22747683  | Breast size                                             | PTHLH, LOC100129646    |
| 22q13.1  | 40960692  | rs5995875  | $3.2 \times 10^{-12}$ | -84458 | 0.818 | rs6001930  | $2.0 \times 10^{-6}$  | 23535733  | Breast cancer                                           | MKL1                   |
| 22q13.1  | 40960692  | rs5995875  | $3.2 \times 10^{-12}$ | -84458 | 0.818 | rs6001930  | $9.0 \times 10^{-19}$ | 23535729  | Breast cancer                                           | MKL1                   |
| 22q13.1  | 40960692  | rs5995875  | $3.2 \times 10^{-12}$ | 35675  | 0.895 | rs17002034 | $4.0 \times 10^{-6}$  | 20889312  | Bipolar disorder and schizophrenia                      |                        |
| 6q25.1   | 151952332 | rs9397437  | $1.3 \times 10^{-11}$ | -38219 | 0.649 | rs3757318  | $2.0 \times 10^{-21}$ | 23535729  | Breast cancer                                           | ESR1                   |
| 6q25.1   | 151952332 | rs9397437  | $1.3 \times 10^{-11}$ | -38219 | 0.649 | rs3757318  | $3.0 \times 10^{-6}$  | 20453838  | Breast cancer                                           | ESR1,C6orf97           |
| 6q25.1   | 151952332 | rs9397437  | $1.3 \times 10^{-11}$ | -12982 | 0.847 | rs3734805  | $1.0 \times 10^{-7}$  | 21263130  | Breast cancer                                           | ESR1                   |

|          |           |            |                       |        |       |            |                        |          |                                                    |                |
|----------|-----------|------------|-----------------------|--------|-------|------------|------------------------|----------|----------------------------------------------------|----------------|
| 6q25.1   | 151952332 | rs9397437  | $1.3 \times 10^{-11}$ | 5382   | 0.728 | rs12173570 | $6.0 \times 10^{-11}$  | 22747683 | Breast size                                        | ESR1, C6orf97  |
| 6q25.1   | 151952332 | rs9397437  | $1.3 \times 10^{-11}$ | 35025  | 0.793 | rs9383938  | $2.0 \times 10^{-10}$  | 22976474 | Breast cancer                                      |                |
| 11q13.3  | 69143284  | rs7102705  | $1.1 \times 10^{-9}$  | 0      | 1.000 | rs7102705  | $5.0 \times 10^{-6}$   | 22747683 | Breast size                                        | IFITM9P, CCND1 |
| 2p25.3   | 632922    | rs62105303 | $2.8 \times 10^{-8}$  | -18754 | 0.872 | rs2947411  | $2.0 \times 10^{-8}$   | 21102462 | Menarche (age at onset)                            | TMEM18         |
| 2p25.3   | 632922    | rs62105303 | $2.8 \times 10^{-8}$  | -10095 | 0.914 | rs2867125  | $3.0 \times 10^{-49}$  | 20935630 | Body mass index                                    | TMEM18         |
| 2p25.3   | 632922    | rs62105303 | $2.8 \times 10^{-8}$  | -8888  | 0.914 | rs6711012  | $6.0 \times 10^{-35}$  | 23563607 | Obesity                                            | TMEM18         |
| 2p25.3   | 632922    | rs62105303 | $2.8 \times 10^{-8}$  | -8244  | 0.914 | rs2903492  | $6.0 \times 10^{-15}$  | 23563607 | Body mass index                                    | TMEM18         |
| 2p25.3   | 632922    | rs62105303 | $2.8 \times 10^{-8}$  | -3678  | 0.957 | rs12463617 | $3.0 \times 10^{-17}$  | 23669352 | Body mass index                                    | TMEM18         |
| 2p25.3   | 632922    | rs62105303 | $2.8 \times 10^{-8}$  | -3678  | 0.957 | rs12463617 | $2.0 \times 10^{-13}$  | 23563609 | Obesity (early onset extreme)                      | TMEM18         |
| 2p25.3   | 632922    | rs62105303 | $2.8 \times 10^{-8}$  | 1983   | 0.957 | rs6548238  | $1.0 \times 10^{-18}$  | 19079261 | Body mass index                                    | TMEM18         |
| 2p25.3   | 632922    | rs62105303 | $2.8 \times 10^{-8}$  | 12031  | 0.940 | rs7561317  | $2.0 \times 10^{-18}$  | 19079260 | Weight                                             | TMEM18         |
| 2p25.3   | 632922    | rs62105303 | $2.8 \times 10^{-8}$  | 12031  | 0.940 | rs7561317  | $4.0 \times 10^{-17}$  | 19079260 | Body mass index                                    | TMEM18         |
| 1q32.1   | 201886769 | rs34091558 | $3.1 \times 10^{-8}$  | -1817  | 0.936 | rs2819348  | $3.0 \times 10^{-6}$   | 22747683 | Breast size                                        | ATP2B4         |
| 12q13.12 | 50261809  | rs3205718  | $1.2 \times 10^{-7}$  | -14341 | 0.841 | rs7138803  | $1.0 \times 10^{-20}$  | 23563607 | Obesity                                            | LOC144233      |
| 12q13.12 | 50261809  | rs3205718  | $1.2 \times 10^{-7}$  | -14341 | 0.841 | rs7138803  | $2.0 \times 10^{-9}$   | 23563607 | Body mass index                                    | LOC144233      |
| 12q13.12 | 50261809  | rs3205718  | $1.2 \times 10^{-7}$  | -14341 | 0.841 | rs7138803  | $2.0 \times 10^{-17}$  | 20935630 | Body mass index                                    | FAIM2          |
| 12q13.12 | 50261809  | rs3205718  | $1.2 \times 10^{-7}$  | -14341 | 0.841 | rs7138803  | $8.0 \times 10^{-7}$   | 19557197 | Waist circumference                                | FAIM2, BCDIN3D |
| 12q13.12 | 50261809  | rs3205718  | $1.2 \times 10^{-7}$  | -14341 | 0.841 | rs7138803  | $2.0 \times 10^{-7}$   | 19079260 | Weight                                             | BCDIN3D, FAIM2 |
| 12q13.12 | 50261809  | rs3205718  | $1.2 \times 10^{-7}$  | -14341 | 0.841 | rs7138803  | $1.0 \times 10^{-7}$   | 19079260 | Body mass index                                    | BCDIN3D, FAIM2 |
| 1p36.22  | 10566272  | rs616402   | $2.0 \times 10^{-7}$  | -57    | 0.807 | rs616488   | $1.0 \times 10^{-8}$   | 23535733 | Breast cancer                                      | PEX14          |
| 1p36.22  | 10566272  | rs616402   | $2.0 \times 10^{-7}$  | -57    | 0.807 | rs616488   | $2.0 \times 10^{-10}$  | 23535729 | Breast cancer                                      | PEX14          |
| 1p36.22  | 10566272  | rs616402   | $2.0 \times 10^{-7}$  | 15386  | 0.987 | rs2056417  | $4.0 \times 10^{-7}$   | 23817569 | Self-reported allergy                              | PEX14          |
| 16q12.2  | 53824226  | rs62033406 | $3.7 \times 10^{-7}$  | -23472 | 0.808 | rs9940128  | $4.0 \times 10^{-23}$  | 23669352 | Body mass index                                    | FTO            |
| 16q12.2  | 53824226  | rs62033406 | $3.7 \times 10^{-7}$  | -23472 | 0.808 | rs9940128  | $2.0 \times 10^{-9}$   | 22399527 | Metabolic syndrome                                 | FTO            |
| 16q12.2  | 53824226  | rs62033406 | $3.7 \times 10^{-7}$  | -23272 | 0.844 | rs1421085  | $1.0 \times 10^{-9}$   | 23636237 | Dietary macronutrient intake                       | FTO            |
| 16q12.2  | 53824226  | rs62033406 | $3.7 \times 10^{-7}$  | -23272 | 0.844 | rs1421085  | $3.0 \times 10^{-28}$  | 23563609 | Obesity (early onset extreme)                      | FTO            |
| 16q12.2  | 53824226  | rs62033406 | $3.7 \times 10^{-7}$  | -23272 | 0.844 | rs1421085  | $1.0 \times 10^{-28}$  | 19151714 | Obesity                                            | FTO            |
| 16q12.2  | 53824226  | rs62033406 | $3.7 \times 10^{-7}$  | -20652 | 0.844 | rs1558902  | $1.0 \times 10^{-7}$   | 21544081 | Obesity                                            | FTO            |
| 16q12.2  | 53824226  | rs62033406 | $3.7 \times 10^{-7}$  | -20652 | 0.844 | rs1558902  | $5.0 \times 10^{-120}$ | 20935630 | Body mass index                                    | FTO            |
| 16q12.2  | 53824226  | rs62033406 | $3.7 \times 10^{-7}$  | -20652 | 0.844 | rs1558902  | $7.0 \times 10^{-13}$  | 20421936 | Obesity (extreme)                                  | FTO            |
| 16q12.2  | 53824226  | rs62033406 | $3.7 \times 10^{-7}$  | -20652 | 0.844 | rs1558902  | $5.0 \times 10^{-19}$  | 19557197 | Waist circumference                                | FTO            |
| 16q12.2  | 53824226  | rs62033406 | $3.7 \times 10^{-7}$  | -14979 | 0.808 | rs1121980  | $4.0 \times 10^{-8}$   | 18454148 | Body mass index                                    | FTO            |
| 16q12.2  | 53824226  | rs62033406 | $3.7 \times 10^{-7}$  | -14979 | 0.808 | rs1121980  | $1.0 \times 10^{-7}$   | 18159244 | Obesity (early onset extreme)                      | FTO            |
| 16q12.2  | 53824226  | rs62033406 | $3.7 \times 10^{-7}$  | -10859 | 0.892 | rs17817449 | $6.0 \times 10^{-7}$   | 23535733 | Breast cancer                                      | MIR1972-2, FTO |
| 16q12.2  | 53824226  | rs62033406 | $3.7 \times 10^{-7}$  | -10859 | 0.892 | rs17817449 | $6.0 \times 10^{-14}$  | 23535729 | Breast cancer                                      | MIR1972-2, FTO |
| 16q12.2  | 53824226  | rs62033406 | $3.7 \times 10^{-7}$  | -10859 | 0.892 | rs17817449 | $2.0 \times 10^{-12}$  | 21552555 | Obesity                                            | FTO            |
| 16q12.2  | 53824226  | rs62033406 | $3.7 \times 10^{-7}$  | -10776 | 0.887 | rs8043757  | $5.0 \times 10^{-110}$ | 23563607 | Obesity                                            | FTO            |
| 16q12.2  | 53824226  | rs62033406 | $3.7 \times 10^{-7}$  | -7951  | 0.887 | rs8050136  | $6.0 \times 10^{-6}$   | 23209189 | Type 2 diabetes                                    | FTO            |
| 16q12.2  | 53824226  | rs62033406 | $3.7 \times 10^{-7}$  | -7951  | 0.887 | rs8050136  | $3.0 \times 10^{-26}$  | 21706003 | Adiposity                                          | FTO            |
| 16q12.2  | 53824226  | rs62033406 | $3.7 \times 10^{-7}$  | -7951  | 0.887 | rs8050136  | $4.0 \times 10^{-8}$   | 21037115 | Body mass in chronic obstructive pulmonary disease | FTO            |
| 16q12.2  | 53824226  | rs62033406 | $3.7 \times 10^{-7}$  | -7951  | 0.887 | rs8050136  | $5.0 \times 10^{-36}$  | 19079260 | Weight                                             | FTO            |
| 16q12.2  | 53824226  | rs62033406 | $3.7 \times 10^{-7}$  | -7951  | 0.887 | rs8050136  | $1.0 \times 10^{-47}$  | 19079260 | Body mass index                                    | FTO            |
| 16q12.2  | 53824226  | rs62033406 | $3.7 \times 10^{-7}$  | -7951  | 0.887 | rs8050136  | $2.0 \times 10^{-17}$  | 19056611 | Type 2 diabetes                                    | FTO            |
| 16q12.2  | 53824226  | rs62033406 | $3.7 \times 10^{-7}$  | -7951  | 0.887 | rs8050136  | $7.0 \times 10^{-6}$   | 18372903 | Type 2 diabetes                                    | FTO            |
| 16q12.2  | 53824226  | rs62033406 | $3.7 \times 10^{-7}$  | -7951  | 0.887 | rs8050136  | $7.0 \times 10^{-14}$  | 17463249 | Type 2 diabetes                                    | FTO            |
| 16q12.2  | 53824226  | rs62033406 | $3.7 \times 10^{-7}$  | -7951  | 0.887 | rs8050136  | $1.0 \times 10^{-12}$  | 17463248 | Type 2 diabetes                                    | FTO            |
| 16q12.2  | 53824226  | rs62033406 | $3.7 \times 10^{-7}$  | -4333  | 0.897 | rs11075990 | $2.0 \times 10^{-51}$  | 23563607 | Body mass index                                    | FTO            |
| 16q12.2  | 53824226  | rs62033406 | $3.7 \times 10^{-7}$  | -3699  | 0.897 | rs9939609  | $1.0 \times 10^{-20}$  | 22693455 | Type 2 diabetes                                    | FTO            |
| 16q12.2  | 53824226  | rs62033406 | $3.7 \times 10^{-7}$  | -3699  | 0.897 | rs9939609  | $3.0 \times 10^{-8}$   | 21102462 | Menarche (age at onset)                            | FTO            |
| 16q12.2  | 53824226  | rs62033406 | $3.7 \times 10^{-7}$  | -3699  | 0.897 | rs9939609  | $2.0 \times 10^{-7}$   | 19396169 | Biomedical quantitative traits                     | FTO            |
| 16q12.2  | 53824226  | rs62033406 | $3.7 \times 10^{-7}$  | -3699  | 0.897 | rs9939609  | $4.0 \times 10^{-51}$  | 19079261 | Body mass index                                    | FTO            |
| 16q12.2  | 53824226  | rs62033406 | $3.7 \times 10^{-7}$  | -3699  | 0.897 | rs9939609  | $2.0 \times 10^{-7}$   | 17554300 | Type 2 diabetes                                    | FTO            |
| 16q12.2  | 53824226  | rs62033406 | $3.7 \times 10^{-7}$  | -3699  | 0.897 | rs9939609  | $2.0 \times 10^{-20}$  | 17434869 | Body mass index                                    | FTO            |
| 16q12.2  | 53824226  | rs62033406 | $3.7 \times 10^{-7}$  | -2611  | 0.903 | rs7202116  | $2.0 \times 10^{-10}$  | 22982992 | Body mass index                                    | FTO            |
| 16q12.2  | 53824226  | rs62033406 | $3.7 \times 10^{-7}$  | 1262   | 0.865 | rs9941349  | $6.0 \times 10^{-12}$  | 19553259 | Obesity (extreme)                                  | FTO            |
| 16q12.2  | 53824226  | rs62033406 | $3.7 \times 10^{-7}$  | 3840   | 0.898 | rs17817964 | $1.0 \times 10^{-10}$  | 23583978 | Body mass index                                    | FTO            |
| 16q12.2  | 53824226  | rs62033406 | $3.7 \times 10^{-7}$  | 6239   | 0.818 | rs9930506  | $9.0 \times 10^{-7}$   | 17658951 | Obesity-related traits                             | FTO            |
| 16q12.2  | 53824226  | rs62033406 | $3.7 \times 10^{-7}$  | 7545   | 0.823 | rs9922619  | $6.0 \times 10^{-8}$   | 22589738 | Subcutaneous adipose tissue                        | FTO            |
| 16q12.2  | 53824226  | rs62033406 | $3.7 \times 10^{-7}$  | 14909  | 0.683 | rs8044769  | $4.0 \times 10^{-6}$   | 22763110 | Osteoarthritis                                     | FTO            |
| 16q12.2  | 53824226  | rs62033406 | $3.7 \times 10^{-7}$  | 18682  | 0.829 | rs12149832 | $5.0 \times 10^{-22}$  | 22344221 | Body mass index                                    | FTO            |
| 16q12.2  | 53824226  | rs62033406 | $3.7 \times 10^{-7}$  | 21261  | 0.645 | rs11642841 | $3.0 \times 10^{-8}$   | 20581827 | Type 2 diabetes                                    | FTO            |

## Replication of GWAS Catalog Results

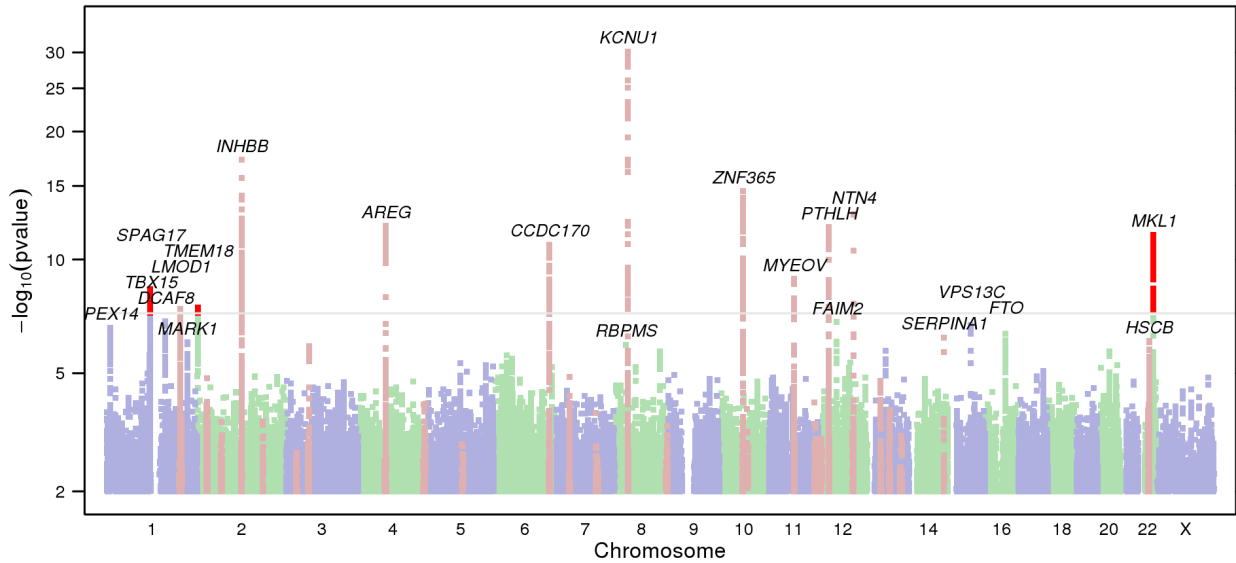

The following table shows, for each GWAS Catalog result for similar traits, our association test result for our best available proxy (distance < 100kb,  $r^2 > 0.8$ ).

| region   | position  | our.name   | our.pval              | dist | rsqr  | assay.name | pvalue                | pubmed.id | trait       | genes                                   |
|----------|-----------|------------|-----------------------|------|-------|------------|-----------------------|-----------|-------------|-----------------------------------------|
| 1q32.1   | 201884952 | rs2819348  | $8.9 \times 10^{-8}$  | 0    | 1.000 | rs2819348  | $3.0 \times 10^{-6}$  | 22747683  | Breast size | ATP2B4                                  |
| 2p23.3   | 27598097  | rs4665972  | 0.00015               | 0    | 1.000 | rs4665972  | $1.0 \times 10^{-6}$  | 22747683  | Breast size | GCKR, SLC4A1AP                          |
| 2p23.3   | 27742603  | rs780093   | 0.00025               | 0    | 1.000 | rs780093   | $5.0 \times 10^{-6}$  | 22747683  | Breast size | SLC4A1AP                                |
| 2p14     | 64495627  | rs1529102  | 0.0020                | 0    | 1.000 | rs1529102  | $6.0 \times 10^{-6}$  | 22747683  | Breast size | RPL23AP37, LOC100128607                 |
| 2q14.2   | 120513133 | rs13401620 | $3.0 \times 10^{-5}$  | 0    | 1.000 | rs13401620 | $2.0 \times 10^{-6}$  | 22747683  | Breast size | EPB41L5                                 |
| 2q14.2   | 121089731 | rs17625845 | $5.6 \times 10^{-18}$ | 0    | 1.000 | rs17625845 | $5.0 \times 10^{-10}$ | 22747683  | Breast size | INHBB                                   |
| 2q14.2   | 121245122 | rs4849887  | $3.0 \times 10^{-13}$ | 0    | 1.000 | rs4849887  | $3.0 \times 10^{-11}$ | 22747683  | Breast size | INHBB, LOC84931, GLI2                   |
| 2q31.2   | 179104298 | rs34479159 | 0.0059                | 0    | 1.000 | rs34479159 | $6.0 \times 10^{-6}$  | 22747683  | Breast size | TTN                                     |
| 3p24.1   | 29209151  | rs6549915  | 0.042                 | 0    | 1.000 | rs6549915  | $9.0 \times 10^{-6}$  | 22747683  | Breast size | MESTP4, RBMS3                           |
| 3p14.2   | 60763256  | rs11919041 | 0.00092               | 0    | 1.000 | rs11919041 | $2.0 \times 10^{-6}$  | 22747683  | Breast size | NPCDR1,PTPRG                            |
| 3p14.2   | 62733366  | rs580384   | $1.8 \times 10^{-6}$  | 0    | 1.000 | rs580384   | $4.0 \times 10^{-6}$  | 22747683  | Breast size | CADPS                                   |
| 4q13.3   | 75502487  | rs62314947 | $3.9 \times 10^{-11}$ | 0    | 1.000 | rs62314947 | $5.0 \times 10^{-8}$  | 22747683  | Breast size | AREG, EREG, EPGN, AREGB                 |
| 4q34.3   | 180383312 | rs2716816  | 0.00027               | 0    | 1.000 | rs2716816  | $7.0 \times 10^{-6}$  | 22747683  | Breast size | RPL19P8                                 |
| 6q25.1   | 151957714 | rs12173570 | $2.6 \times 10^{-9}$  | 0    | 1.000 | rs12173570 | $6.0 \times 10^{-11}$ | 22747683  | Breast size | ESR1, C6orf97                           |
| 7p14.2   | 36952021  | rs10488023 | 0.00020               | 0    | 1.000 | rs10488023 | $8.0 \times 10^{-6}$  | 22747683  | Breast size | ELMO1                                   |
| 7q31.1   | 111642646 | rs61159171 | 0.57                  | 0    | 1.000 | rs61159171 | $6.0 \times 10^{-6}$  | 22747683  | Breast size | ZNF277                                  |
| 8p11.23  | 36846109  | rs7816345  | $1.0 \times 10^{-30}$ | 0    | 1.000 | rs7816345  | $2.0 \times 10^{-14}$ | 22747683  | Breast size | ZNF703,MRPS7P1,KCNU1                    |
| 8q24.3   | 142540925 | rs7837045  | 0.36                  | 0    | 1.000 | rs7837045  | $5.0 \times 10^{-6}$  | 22747683  | Breast size | FLJ43860                                |
| 10q21.2  | 64187564  | rs7089814  | $3.2 \times 10^{-13}$ | 0    | 1.000 | rs7089814  | $3.0 \times 10^{-9}$  | 22747683  | Breast size | ZNF365, ALDH7A1P4, ADO                  |
| 10q22.2  | 76703006  | rs10466033 | 0.39                  | 0    | 1.000 | rs10466033 | $6.0 \times 10^{-6}$  | 22747683  | Breast size | COMTD1,SPA17P1                          |
| 11q13.3  | 69143284  | rs7102705  | $1.1 \times 10^{-9}$  | 0    | 1.000 | rs7102705  | $5.0 \times 10^{-6}$  | 22747683  | Breast size | IFITM9P, CCND1                          |
| 11q24.2  | 125873102 | rs7104745  | 0.039                 | 0    | 1.000 | rs7104745  | $6.0 \times 10^{-6}$  | 22747683  | Breast size | KIRREL3                                 |
| 12p13.31 | 9380859   | rs10771431 | 0.0020                | 0    | 1.000 | rs10771431 | $2.0 \times 10^{-6}$  | 22747683  | Breast size | LOC642846, LOC728715                    |
| 12p11.22 | 28156081  | rs12371778 | $1.0 \times 10^{-10}$ | 0    | 1.000 | rs12371778 | $1.0 \times 10^{-8}$  | 22747683  | Breast size | PTHLH, LOC100129646                     |
| 12q22    | 96027759  | rs17356907 | $1.3 \times 10^{-13}$ | 0    | 1.000 | rs17356907 | $1.0 \times 10^{-6}$  | 22747683  | Breast size | NEDD1, MIR135A2                         |
| 13q13.3  | 36531548  | rs34065801 | 0.0011                | 0    | 1.000 | rs34065801 | $6.0 \times 10^{-6}$  | 22747683  | Breast size | FAM48A                                  |
| 13q21.2  | 59953466  | rs12585963 | 0.0048                | 0    | 1.000 | rs12585963 | $2.0 \times 10^{-6}$  | 22747683  | Breast size | TDRD3                                   |
| 13q31.3  | 93581791  | rs9523848  | 0.042                 | 0    | 1.000 | rs9523848  | $3.0 \times 10^{-6}$  | 22747683  | Breast size | GPC6                                    |
| 14q32.13 | 94796184  | rs61280460 | 0.00032               | 0    | 1.000 | rs61280460 | $8.0 \times 10^{-7}$  | 22747683  | Breast size | SERPINA6, CLMN                          |
| 22q12.1  | 29161007  | rs4820792  | $2.8 \times 10^{-6}$  | 0    | 1.000 | rs4820792  | $4.0 \times 10^{-7}$  | 22747683  | Breast size | CHEK2, MTFP1, LOC646513, SEC14L2, SDC4P |

## Nearby Nonsynonymous SNPs

| region   | position  | our.name    | our.pval              | dist    | rsqr  | assay.name | gene     | aa.chg |
|----------|-----------|-------------|-----------------------|---------|-------|------------|----------|--------|
| 8p11.23  | 36847115  | rs10110651  | $7.1 \times 10^{-31}$ | -58636  | 0.862 | rs16885577 | KCNU1    | N916S  |
| 10q21.2  | 64178657  | rs3081227   | $2.5 \times 10^{-15}$ | -44461  | 0.609 | rs3830349  | ZNF365   | ?-10?  |
| 1p12     | 118770271 | rs2359714   | $3.8 \times 10^{-9}$  | -204318 | 0.510 | rs10923472 | SPAG17   | P1348L |
| 1q32.1   | 201886769 | rs34091558  | $3.1 \times 10^{-8}$  | -26143  | 0.904 | rs2250377  | SHISA4   | I159M  |
| 1q32.1   | 201886769 | rs34091558  | $3.1 \times 10^{-8}$  | -17512  | 0.898 | rs2820312  | LMOD1    | T295M  |
| 15q22.2  | 62220772  | rs148713408 | $1.6 \times 10^{-7}$  | -1435   | 1.000 | rs75341202 | VPS13C   | L2157F |
| 14q32.13 | 94844947  | rs28929474  | $5.1 \times 10^{-7}$  | 0       | 1.000 | rs28929474 | SERPINA1 | E366K  |

## Nearby Expression QTLs

| region | position | our.name | our.pval | dist | rsqr | assay.name | eqtl.dist | eqtl.gene | eqtl.pval | eqtl.rsqr | tissue | pubmed.id |
|--------|----------|----------|----------|------|------|------------|-----------|-----------|-----------|-----------|--------|-----------|
|--------|----------|----------|----------|------|------|------------|-----------|-----------|-----------|-----------|--------|-----------|

|         |           |             |                       |        |       |            |         |          |                       |       |                |          |
|---------|-----------|-------------|-----------------------|--------|-------|------------|---------|----------|-----------------------|-------|----------------|----------|
| 22q13.1 | 40960692  | rs5995875   | $3.2 \times 10^{-12}$ | 35675  | 0.895 | rs17002034 | 190074  | SGSM3    | $5.1 \times 10^{-6}$  | 0.014 | Monocyte       | 20502693 |
| 1p12    | 119500483 | rs2645288   | $1.1 \times 10^{-7}$  | 37950  | 0.544 | rs1409159  | 35406   | WARS2    | 0.0                   | 0.475 | Lymphoblastoid | 19644074 |
| 1p12    | 119500483 | rs2645288   | $1.1 \times 10^{-7}$  | 37950  | 0.544 | rs1409159  | 35406   | WARS2    | 0.0                   | 0.433 | T-cell         | 19644074 |
| 1q23.2  | 160238857 | rs6427508   | $1.1 \times 10^{-7}$  | 17147  | 0.889 | rs2820421  | 2373    | COPA     | $1.3 \times 10^{-16}$ | 0.048 | Monocyte       | 20502693 |
| 1p36.22 | 10566272  | rs616402    | $2.0 \times 10^{-7}$  | -26729 | 0.875 | rs607941   | -750269 | CLSTN1   | 0.00018               | 0.049 | B-Cell         | 22446964 |
| 1p36.22 | 10566272  | rs616402    | $2.0 \times 10^{-7}$  | -25761 | 0.606 | rs12402967 | -153706 | PGD      | 0.00010               |       | Lymphoblastoid | 20220756 |
| 1p36.22 | 10566272  | rs616402    | $2.0 \times 10^{-7}$  | -21725 | 0.875 | rs668805   | 0       | PEX14    | $1.2 \times 10^{-19}$ | 0.057 | Monocyte       | 20502693 |
| 1p36.22 | 10566272  | rs616402    | $2.0 \times 10^{-7}$  | -2780  | 0.856 | rs2506901  | -72202  | APITD1   | $6.9 \times 10^{-9}$  | 0.113 | Monocyte       | 22446964 |
| 1q41    | 220701165 | rs200550907 | $7.9 \times 10^{-7}$  | -30130 | 0.581 | rs3860322  | 201257  | C1ORF115 | $4.8 \times 10^{-12}$ | 0.158 | B-Cell         | 22446964 |

## Nearby Clinical Variants

| source  | region   | our.name   | our.pval             | dist | rsqr  | assay.name | gene     | phenotype                             | accession         |
|---------|----------|------------|----------------------|------|-------|------------|----------|---------------------------------------|-------------------|
| clinvar | 14q32.13 | rs28929474 | $5.1 \times 10^{-7}$ | 0    | 1.000 | rs28929474 | SERPINA1 | Chronic obstructive pulmonary disease | NCBI curation     |
| clinvar | 14q32.13 | rs28929474 | $5.1 \times 10^{-7}$ | 0    | 1.000 | rs28929474 | SERPINA1 | Alpha-1-antitrypsin deficiency        | SNOMED CT30188007 |

## Regional Association Plots

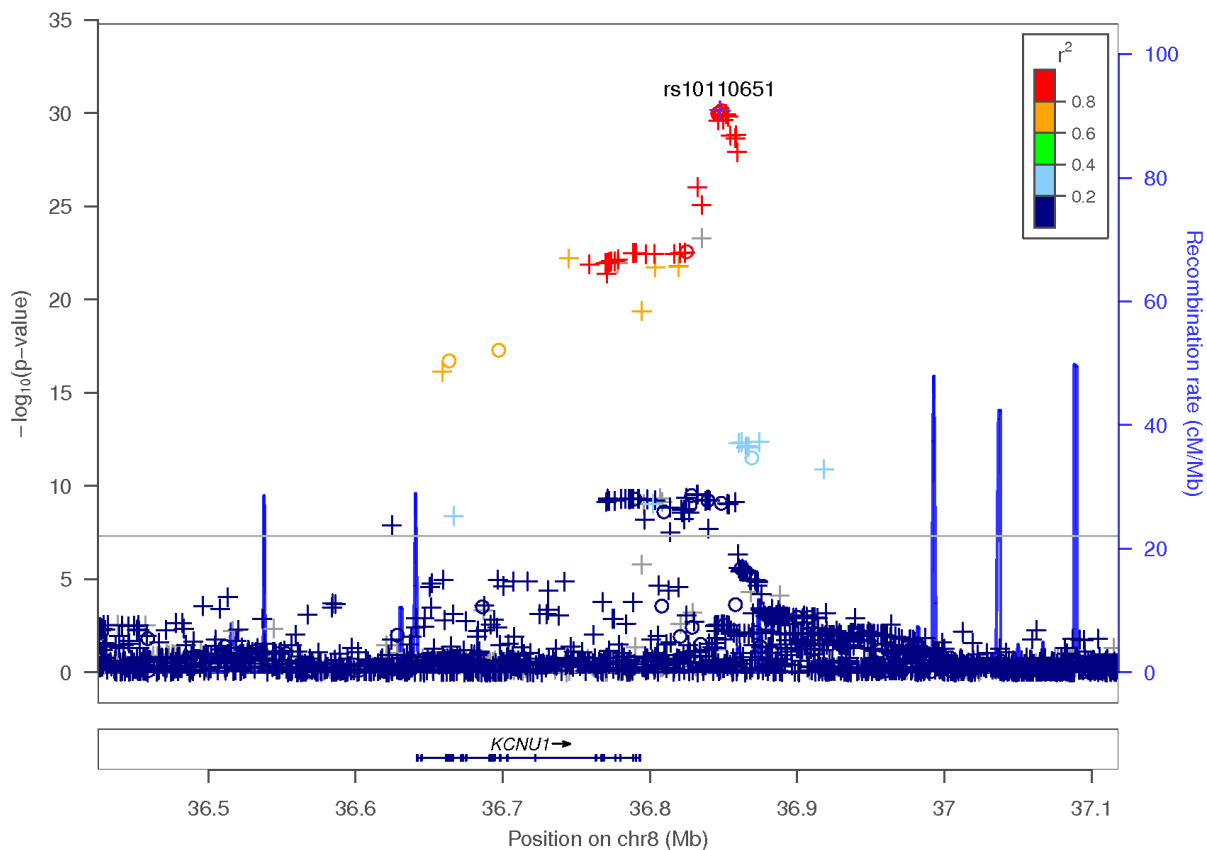

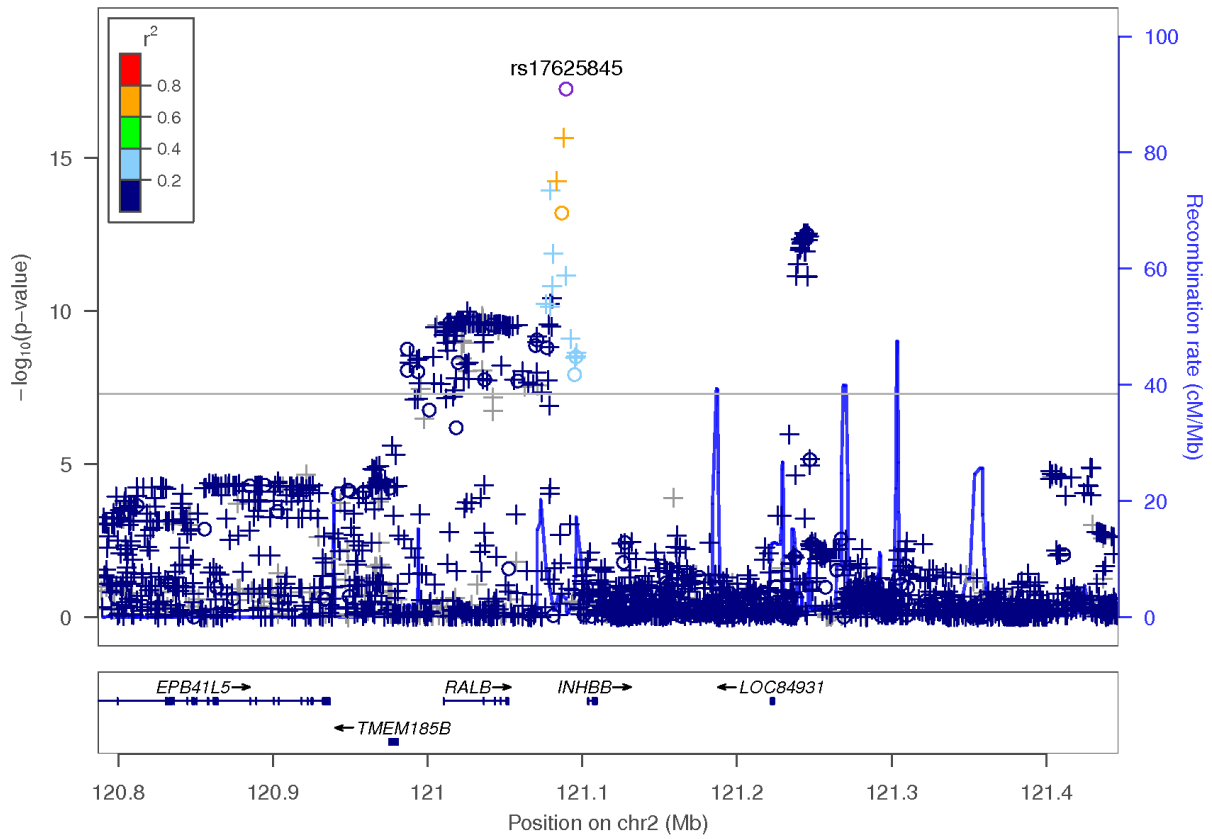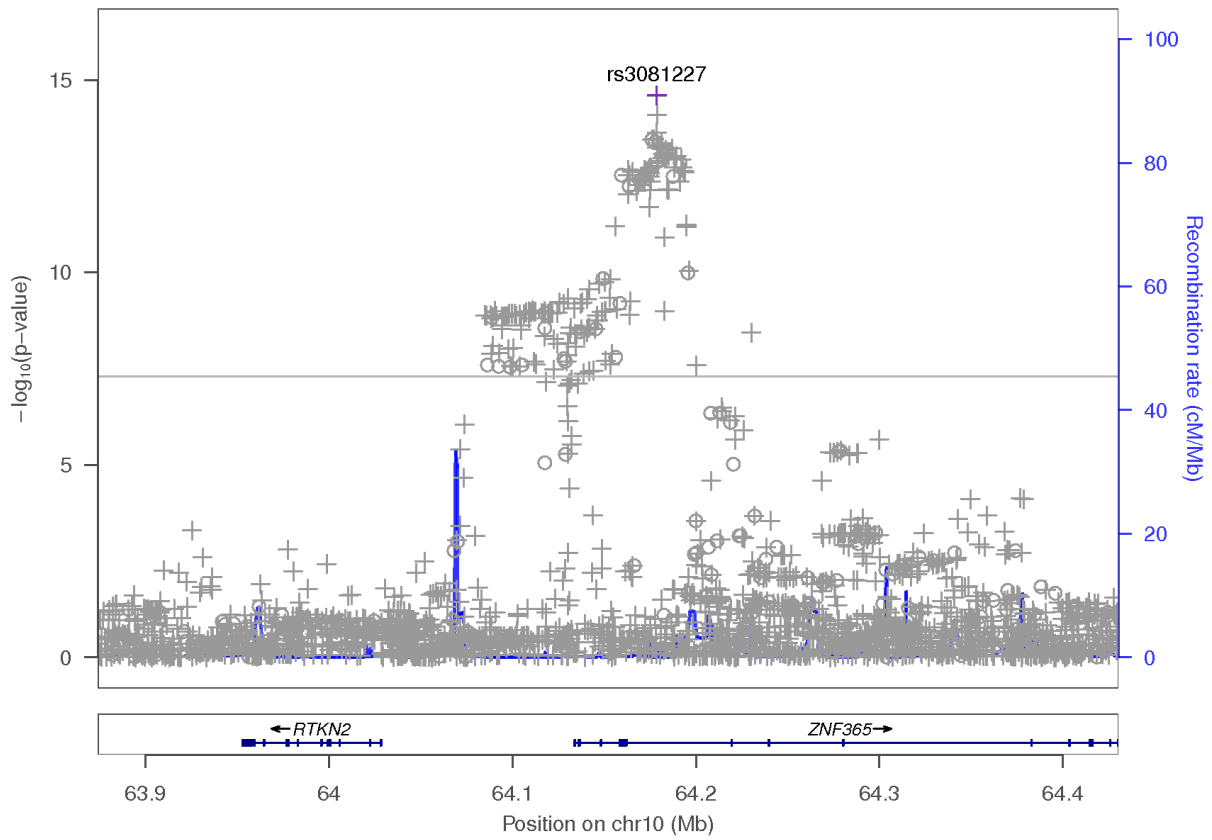



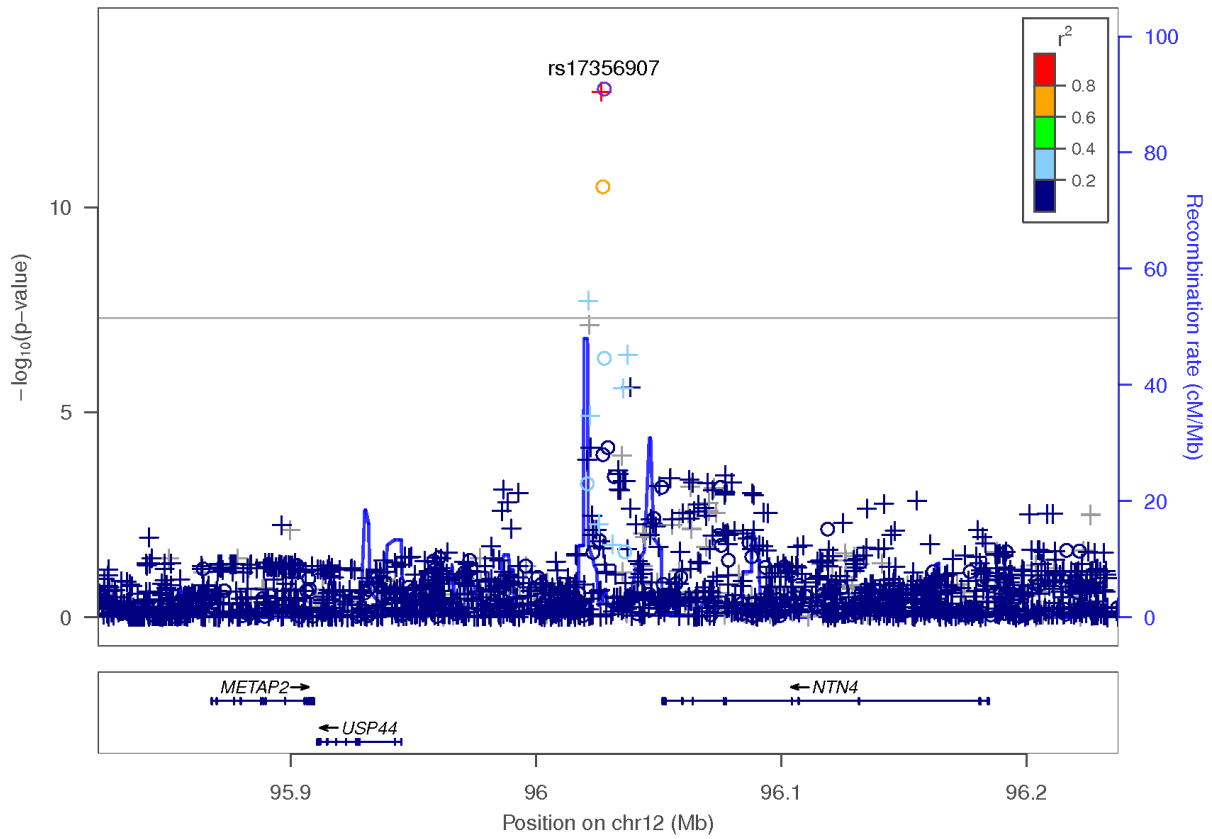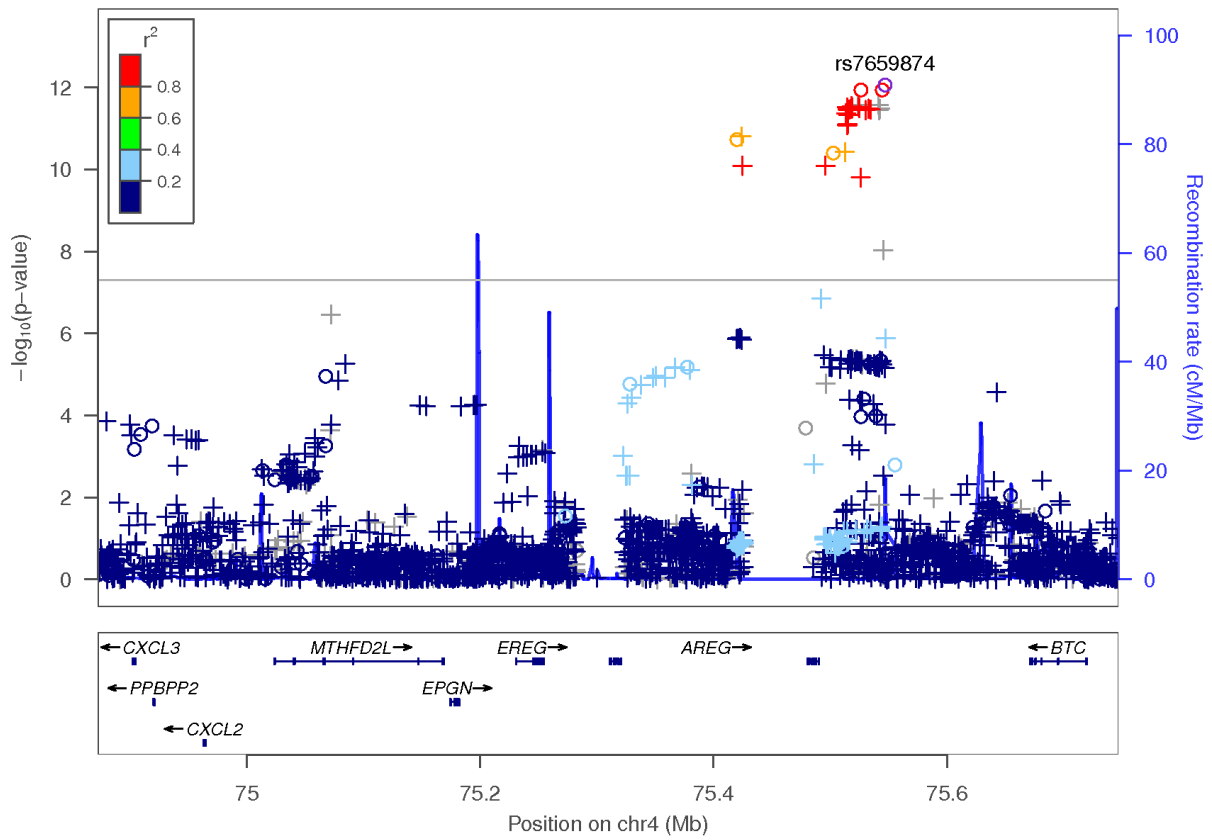

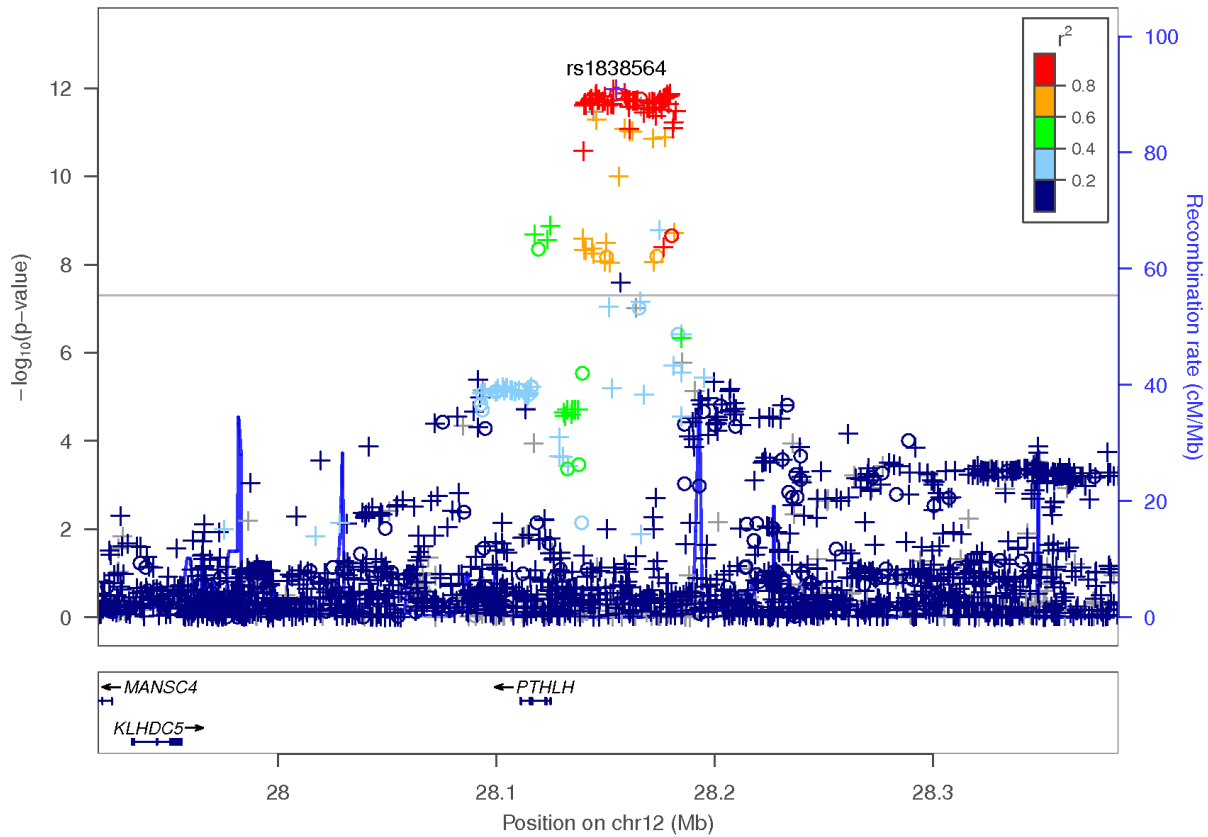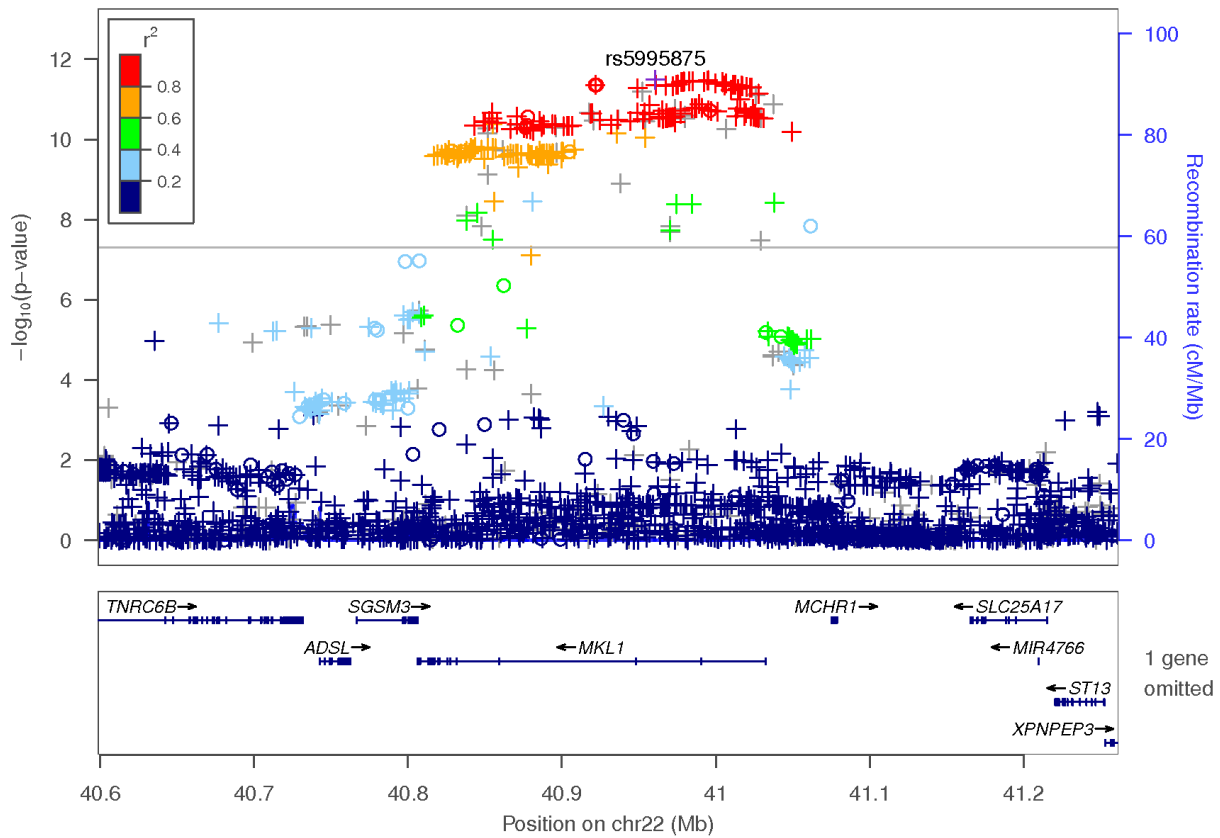

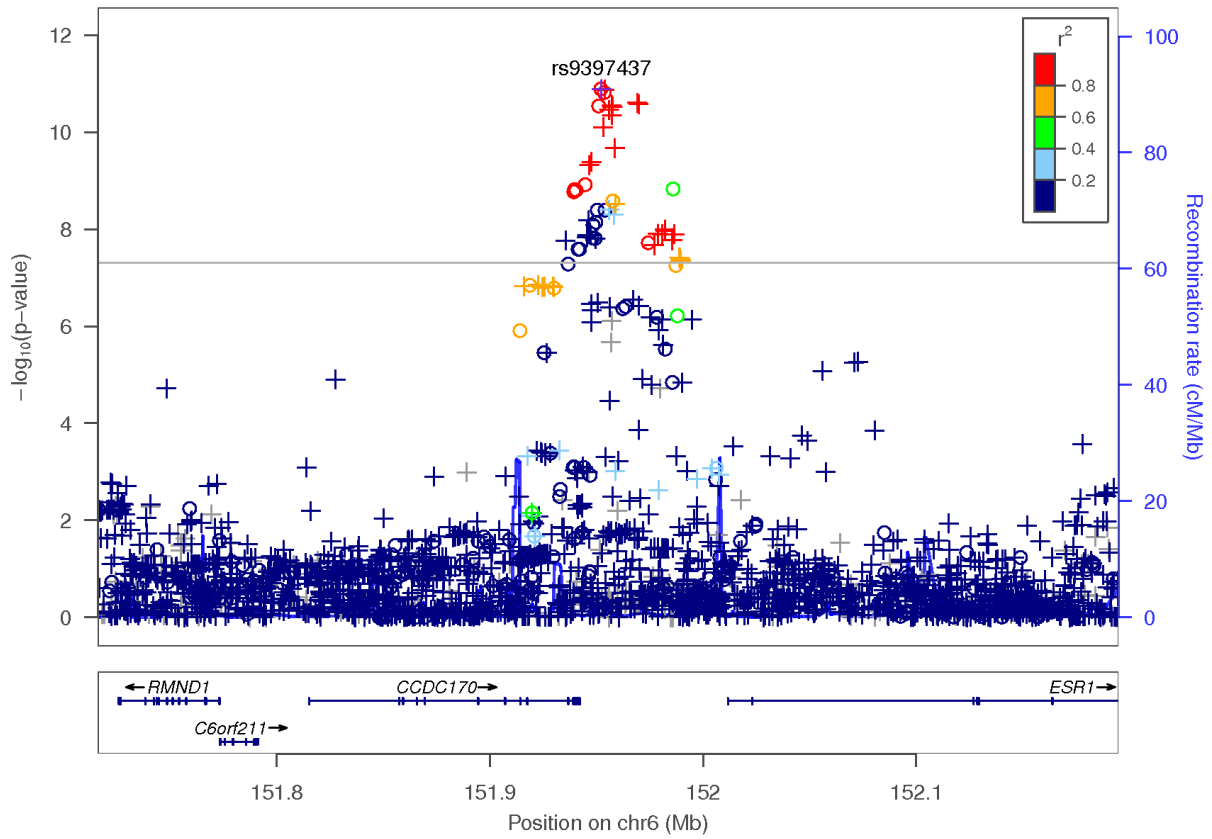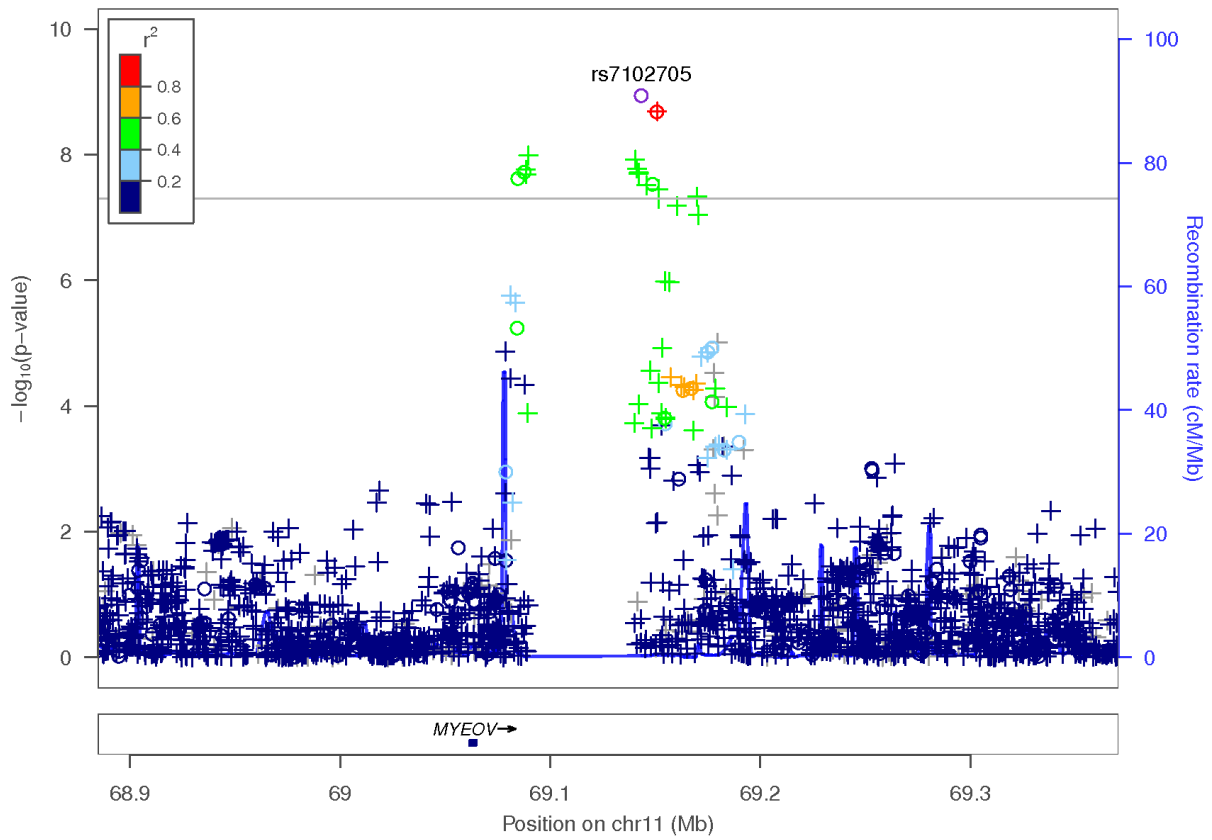

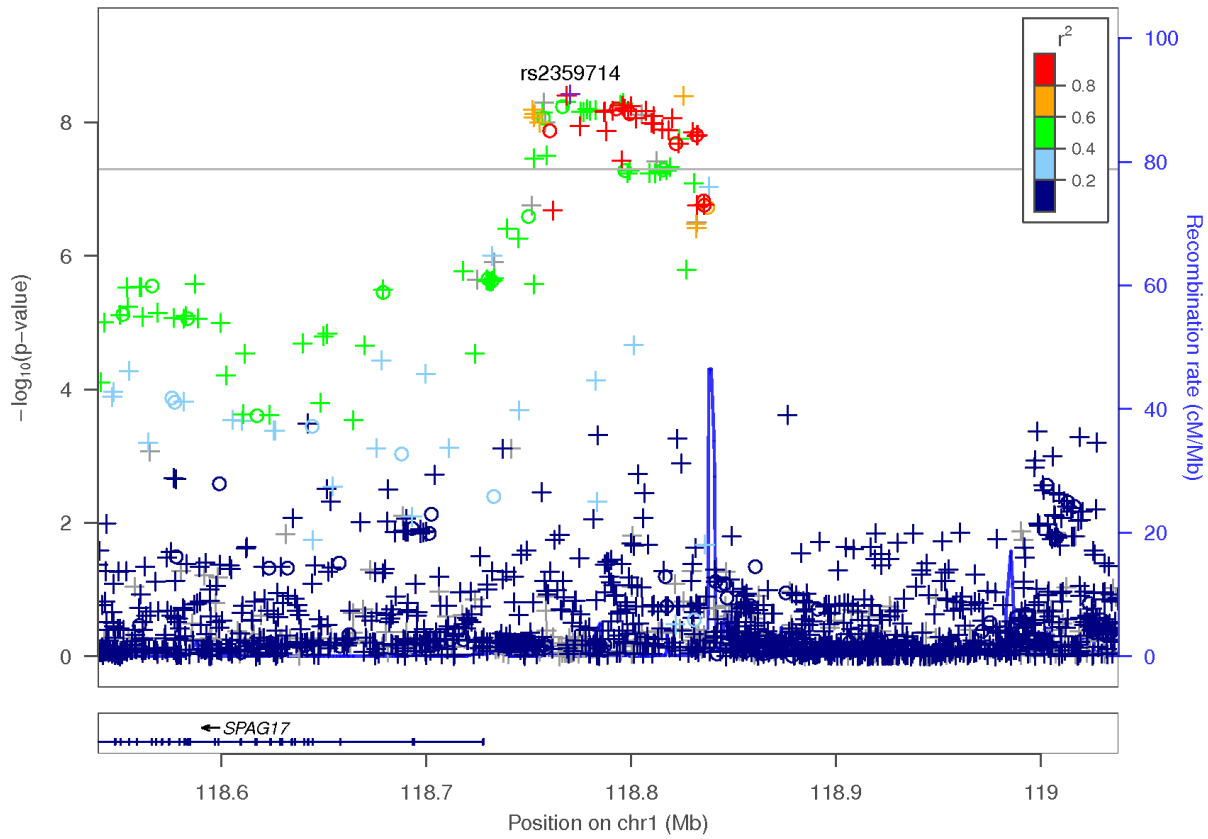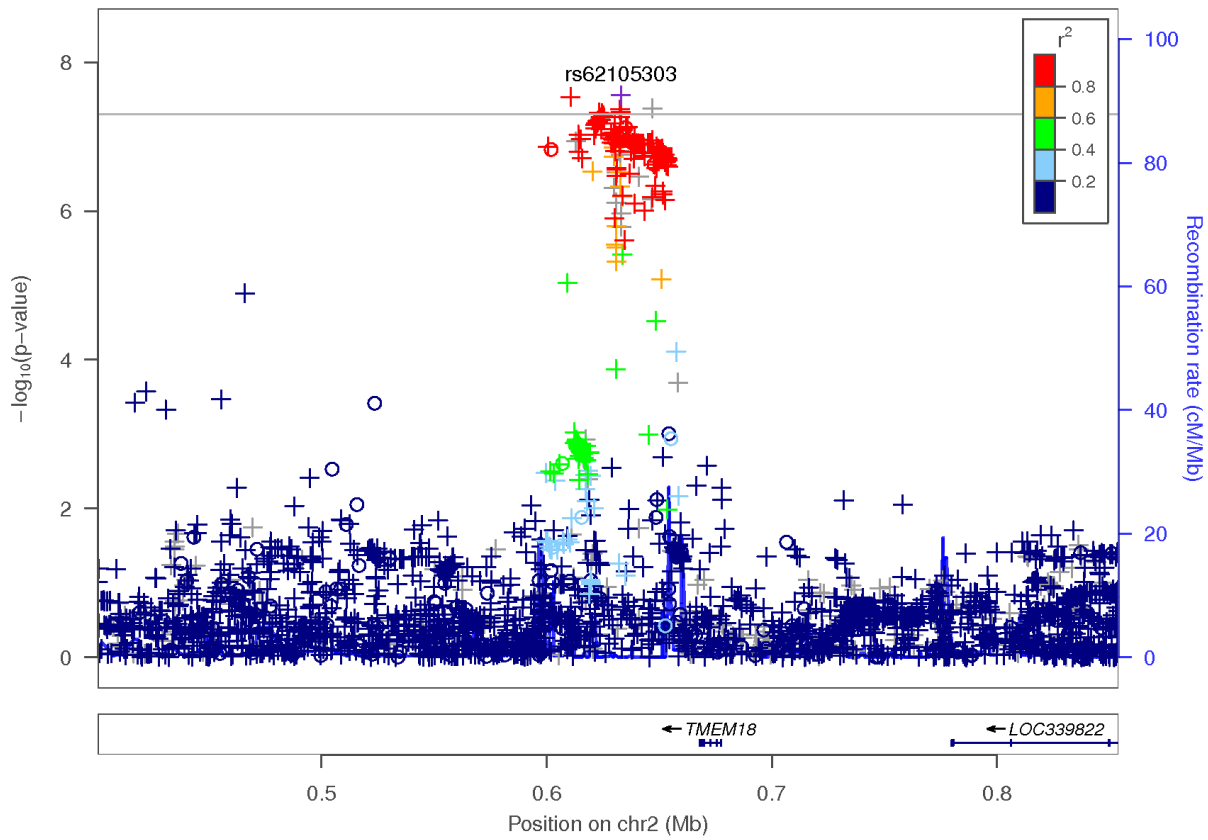

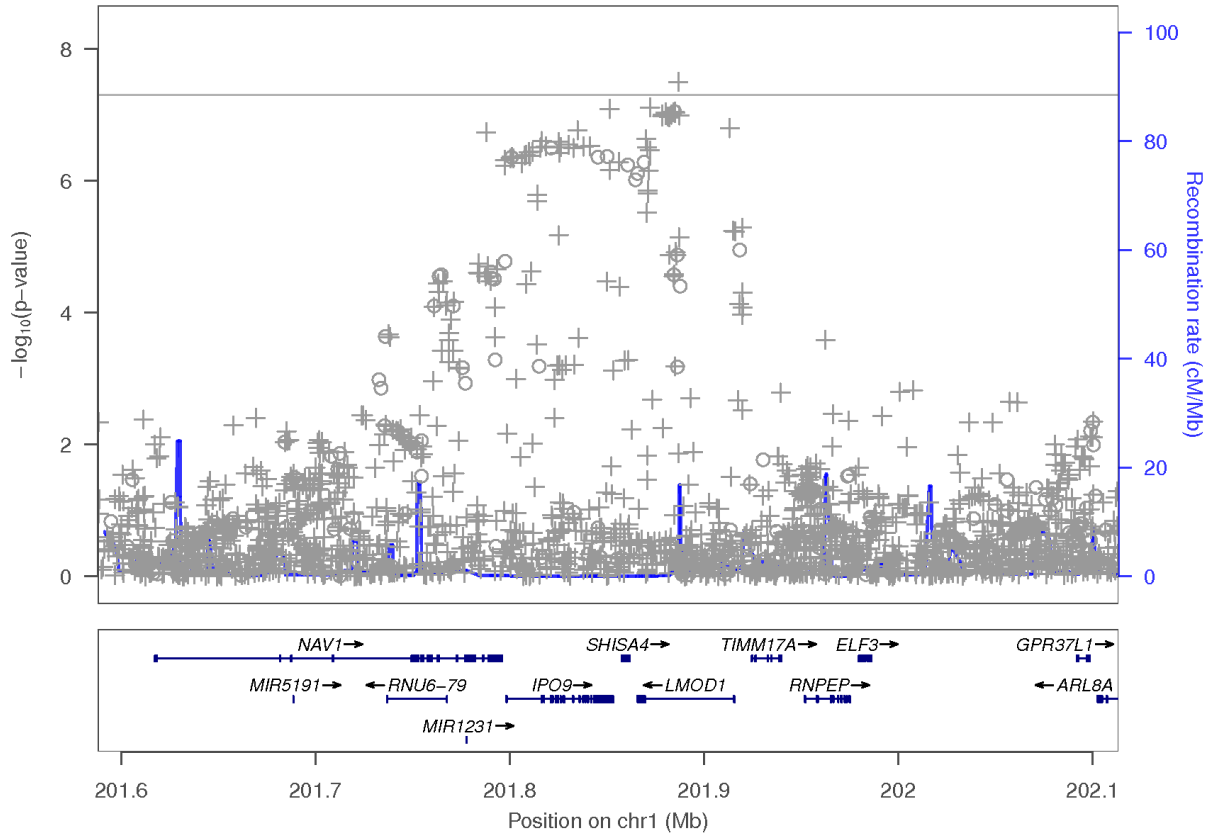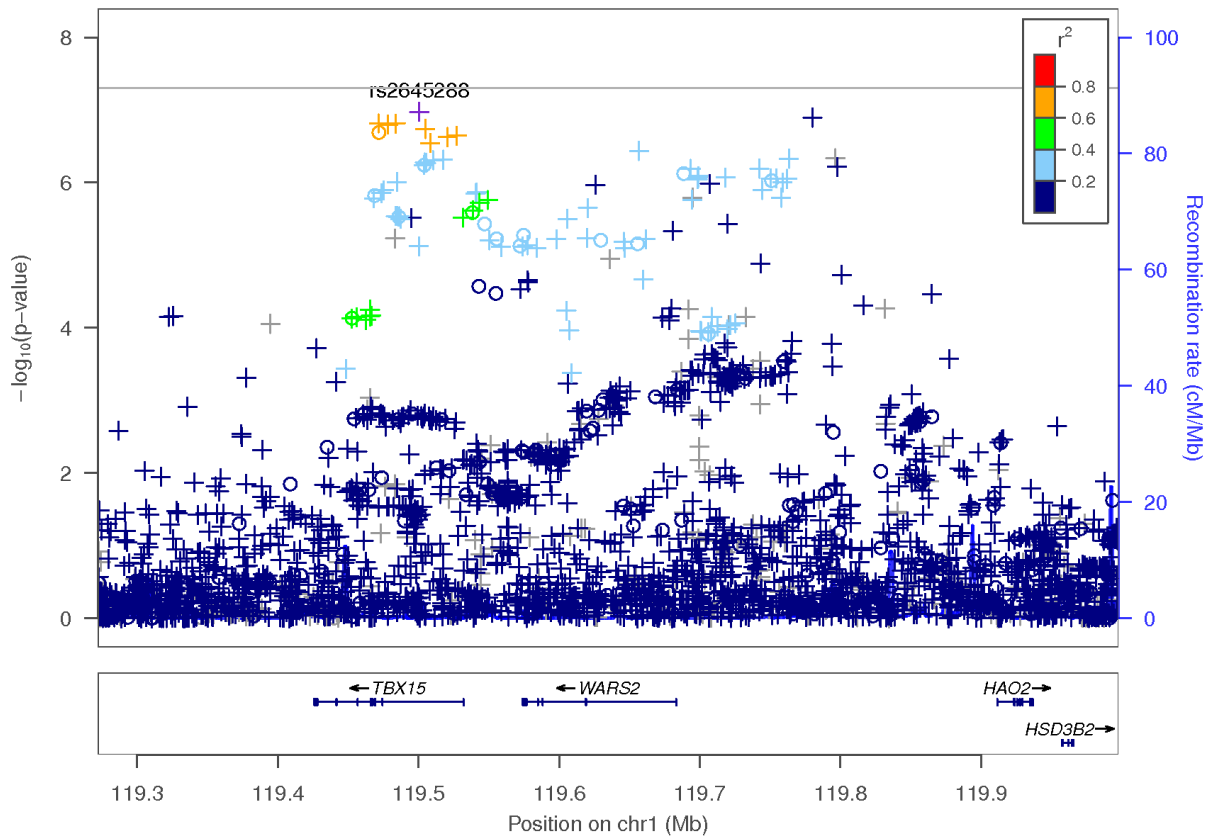

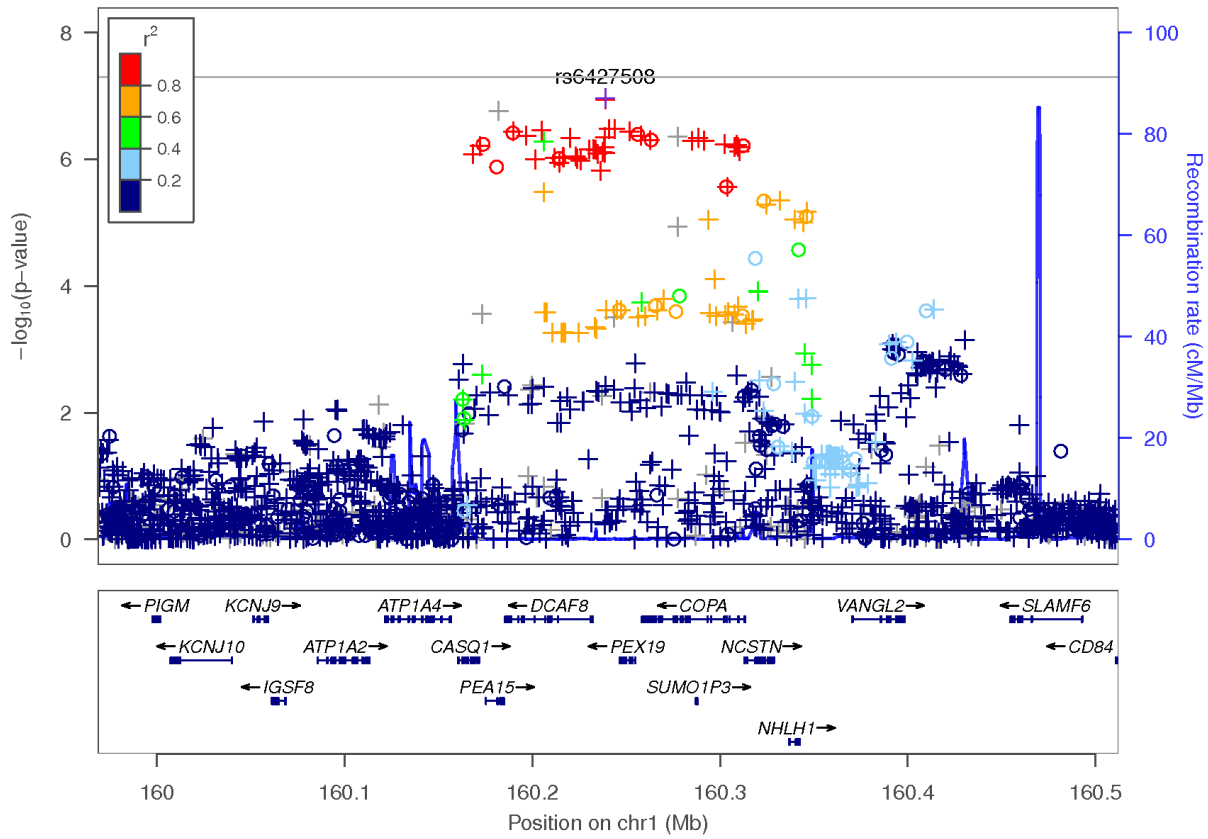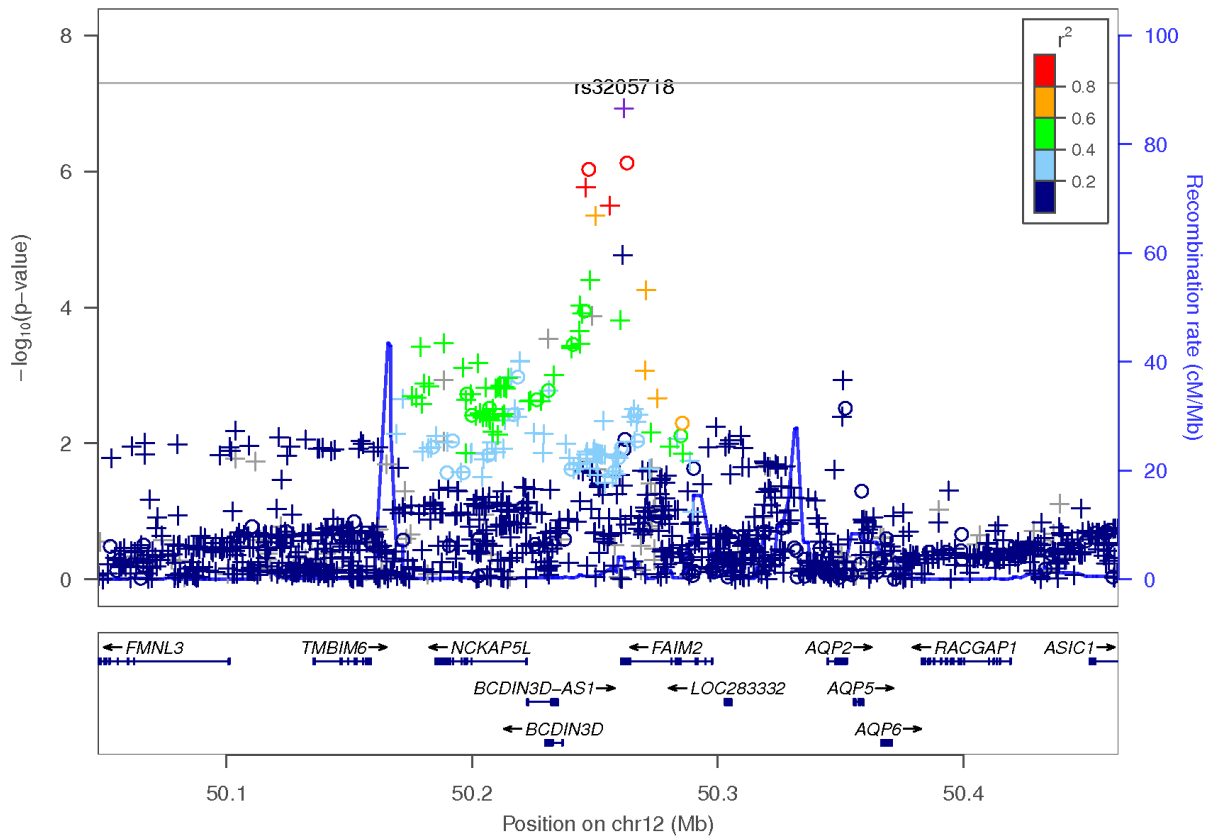

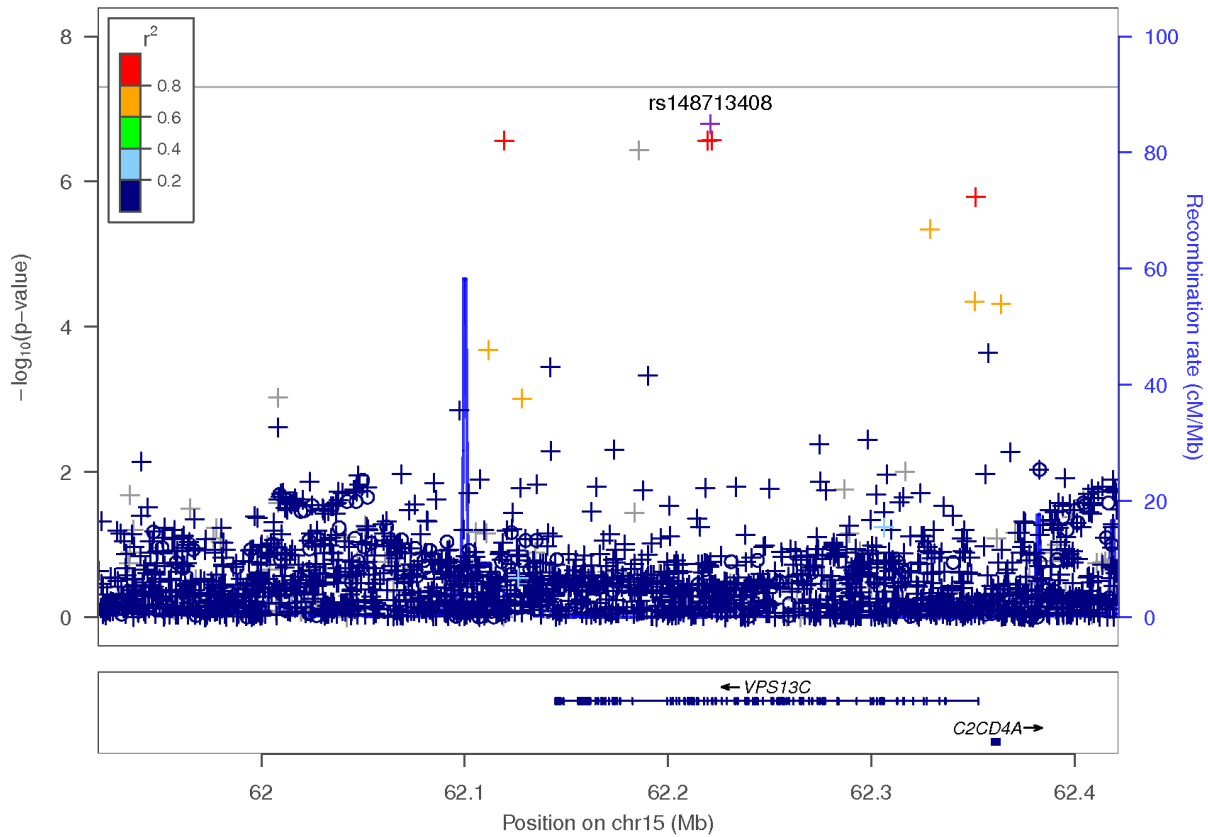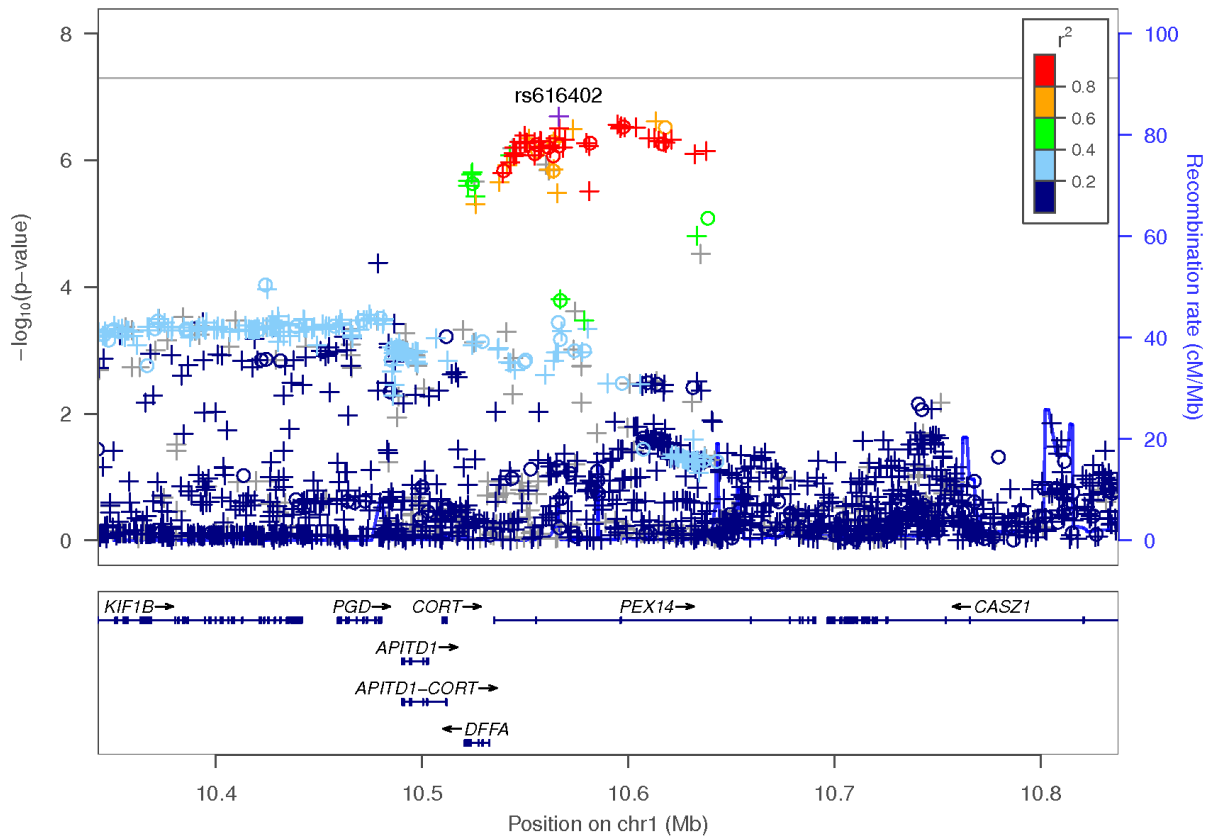

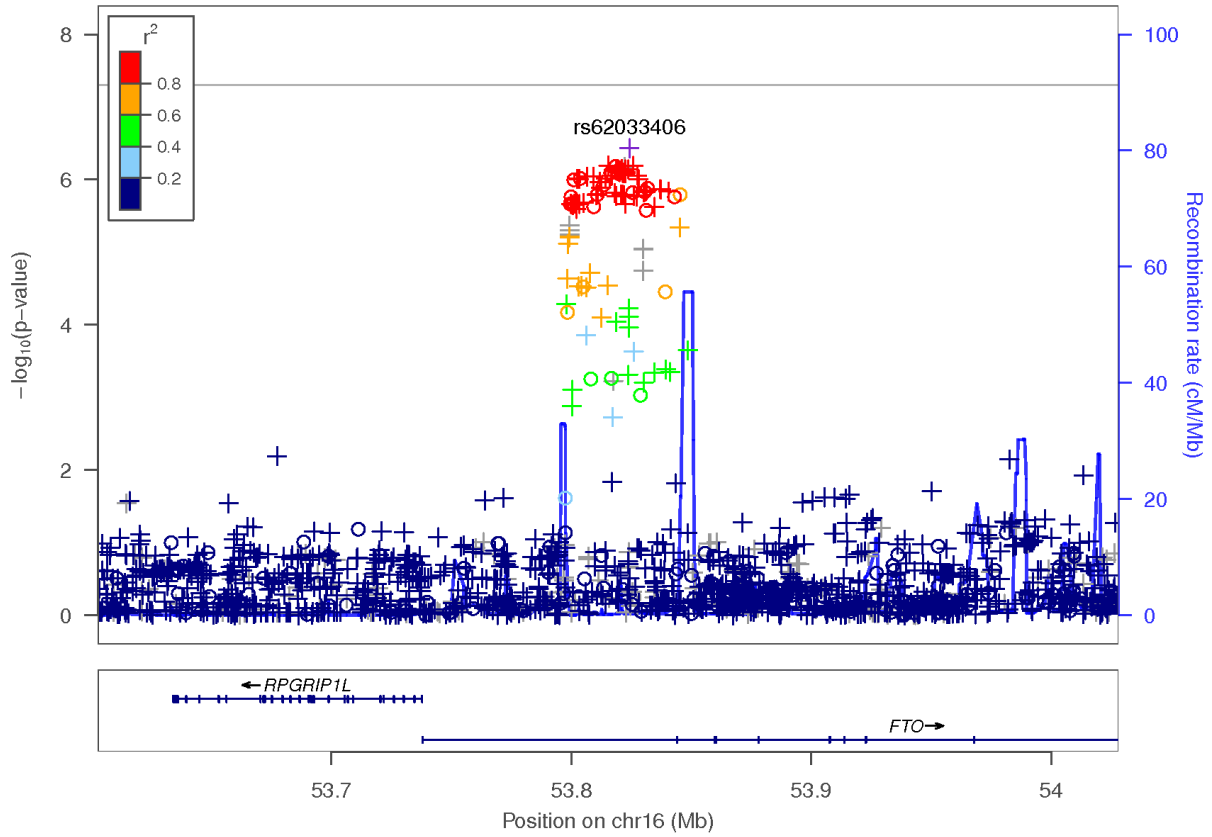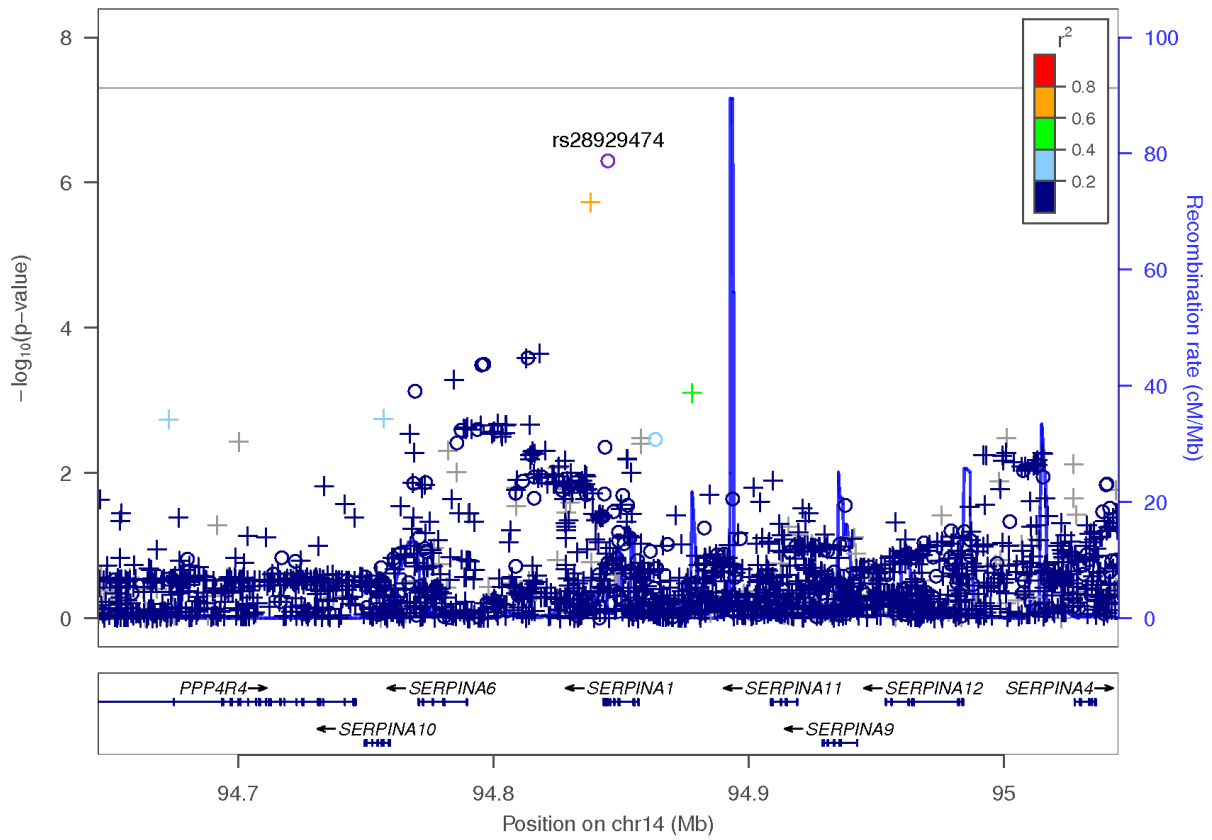



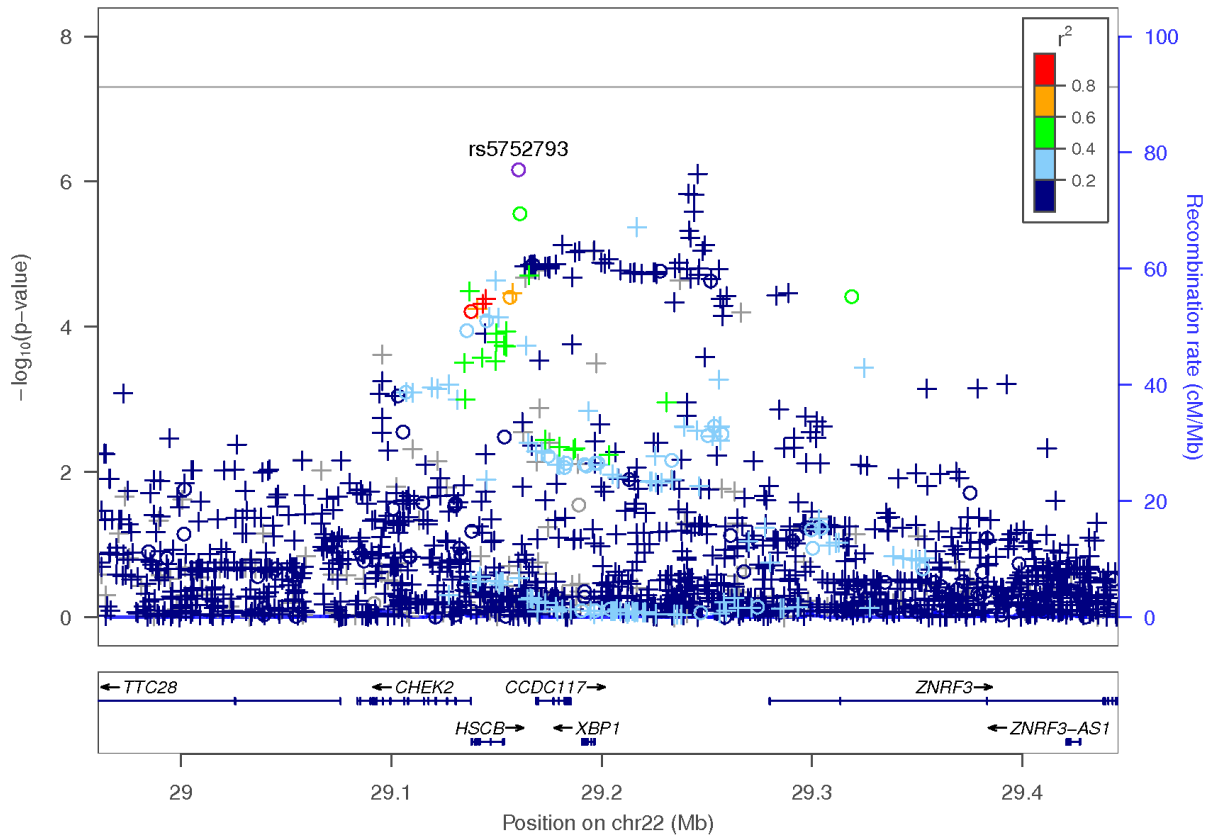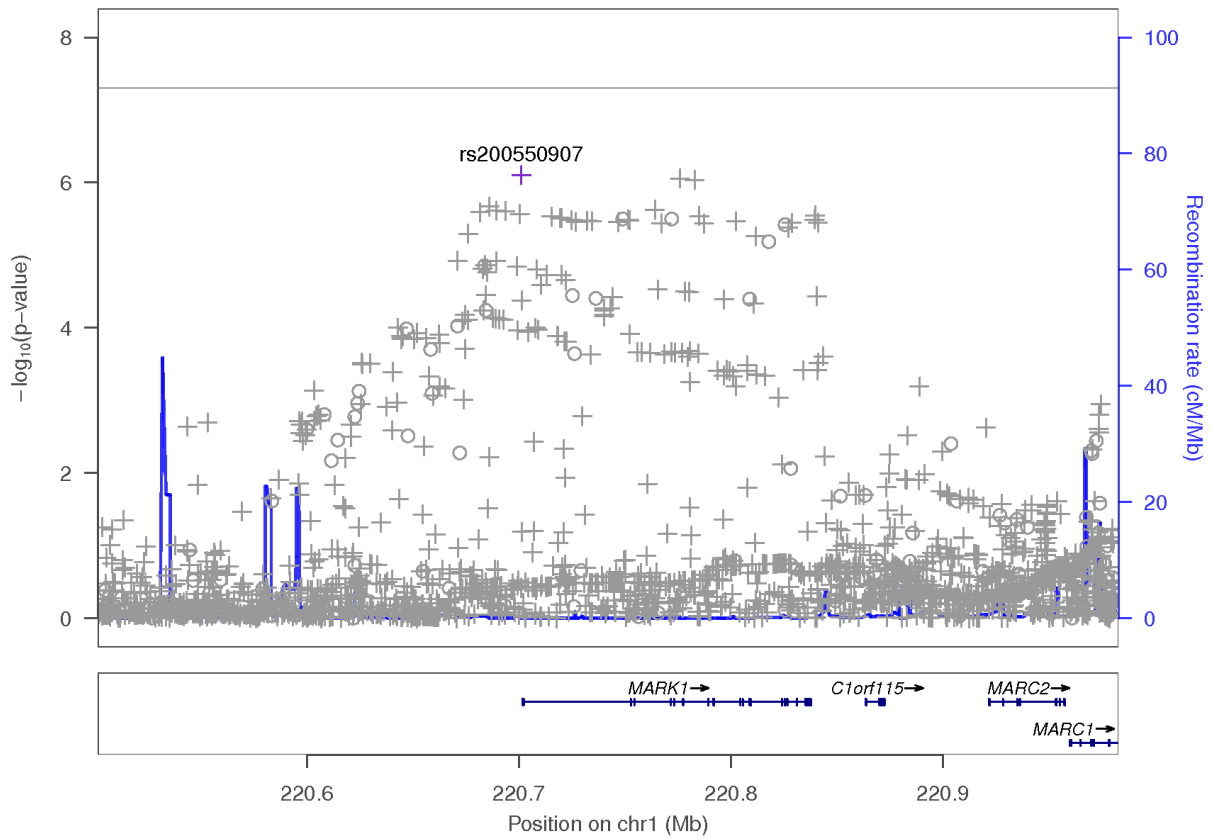

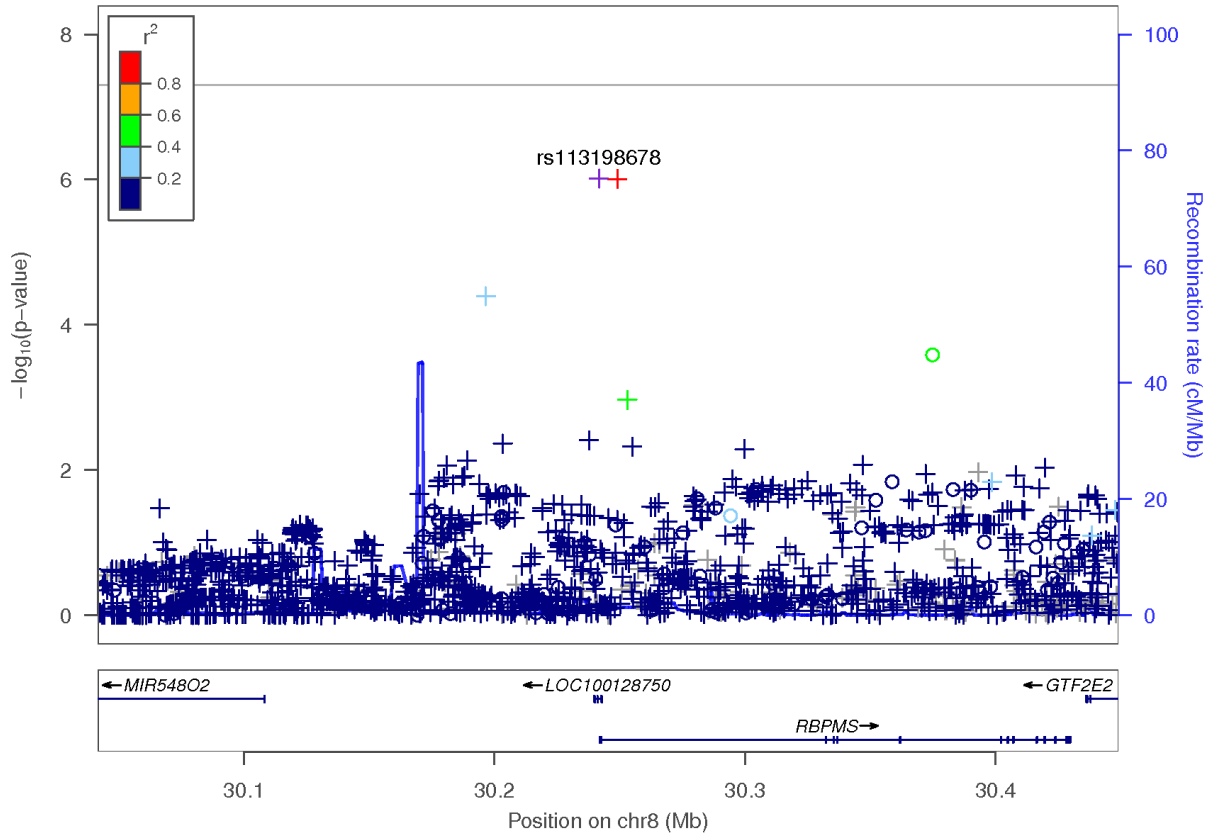

Supplement: NIHMS780506-supplement-7.pdf [file NIHMS780506-supplement-7.pdf]
