# Supplementary material
Source: PubMed Central journal article supplement (PMC5207801)

# Analysis Summary: Childhood Ear Infections

## Phenotype Description

Data on childhood ear infections comes from one source:

- Research snippet:
  - “Did you have several ear infections as a child (under the age of 18)?” (Yes, No, I’m not\_sure)

Cases gave a positive response to this question, and controls gave a negative response to this question.

## Phenotype Statistics

The following table shows demographics of unrelated, European individuals included in the GWAS.

| Phenotype                    | Group   | Total | M     | F     | (0,30] | (30,45] | (45,60] | (60,Inf] |
|------------------------------|---------|-------|-------|-------|--------|---------|---------|----------|
| iqb.childhood_ear_infections | case    | 46936 | 22914 | 24022 | 7829   | 14299   | 12580   | 12228    |
|                              | control | 74874 | 38359 | 36515 | 9778   | 20720   | 21043   | 23333    |

The following table shows the phenotypic distribution across 23andMe genotyping platforms for individuals included in the GWAS.

| Phenotype                    | Group   | Total | v1/v2 | v3    | v4    |
|------------------------------|---------|-------|-------|-------|-------|
| iqb.childhood_ear_infections | case    | 46936 | 2652  | 36693 | 7591  |
|                              | control | 74874 | 4190  | 58650 | 12034 |

## Null Model with Covariates

The following table shows results of fitting a model for the trait based on just the covariates. Principal coordinates have been standardized, so these effect sizes are in units of standard deviations.

|      | Estimate | Std. Error | z value | Pr(> z )               | LRT   | Pr(>Chi)               |
|------|----------|------------|---------|------------------------|-------|------------------------|
| age  | -0.0103  | 0.000374   | -27.5   | $4.4 \times 10^{-166}$ | 760.5 | $2.1 \times 10^{-167}$ |
| sexF | 0.1093   | 0.011859   | 9.2     | $3.0 \times 10^{-20}$  | 85.1  | $2.9 \times 10^{-20}$  |
| pc.0 | 0.0543   | 0.006068   | 8.9     | $3.8 \times 10^{-19}$  | 81.2  | $2.0 \times 10^{-19}$  |
| pc.1 | -0.0451  | 0.006011   | -7.5    | $5.9 \times 10^{-14}$  | 56.9  | $4.5 \times 10^{-14}$  |
| pc.2 | -0.0417  | 0.006058   | -6.9    | $5.8 \times 10^{-12}$  | 47.7  | $5.1 \times 10^{-12}$  |
| pc.3 | 0.0297   | 0.005925   | 5.0     | $5.5 \times 10^{-7}$   | 25.1  | $5.4 \times 10^{-7}$   |
| pc.4 | 0.0107   | 0.005907   | 1.8     | 0.069                  | 3.3   | 0.069                  |

## SNP-level QC information

The following table shows results for QC filters on the genotyped data:

|                         | failed | passed  |
|-------------------------|--------|---------|
| no filters              | 0      | 1030430 |
| not V1-only, chrM, chrY | 4790   | 1025640 |
| parent-offspring test   | 2129   | 1023511 |
| MAF > 0%                | 3203   | 1020494 |
| HWE > 1e-20             | 48225  | 972832  |
| gt.rate > 90%           | 30775  | 952826  |
| batch effects           | 28267  | 945446  |

The following table shows results for QC filters on the imputed dosage data:

|                    | failed | passed   |
|--------------------|--------|----------|
| no filters         | 0      | 13733809 |
| MAF > 0%           | 0      | 13733809 |
| imputation quality | 0      | 13733809 |
| batch effects      | 2168   | 13731641 |

The following table shows results for QC filters on the merged association test results:

|                    | <b>passed</b> | <b>total</b> |
|--------------------|---------------|--------------|
| imputed only       | 12833621      | 12833621     |
| both passed        | 898002        | 13731623     |
| genotyped only     | 47444         | 13779067     |
| no test result     | -8685         | 13770382     |
| failed to converge | -15718        | 13754664     |

## Genetic Association Tests

We performed logistic regression assuming an additive model for allelic effects, using the model:

$$iqb.childhood\_ear\_infections \sim age + sex + pc.0 + pc.1 + pc.2 + pc.3 + pc.4 + genotype$$

This genome-wide association analysis includes data from 46936 cases and 74874 controls of European ancestry, filtered to remove close relatives.

The results in this report have been adjusted for a genomic control inflation factor  $\lambda=1.087$ . The equivalent inflation factor for 1000 cases and 1000 controls  $\lambda_{1000}= 1.002$  , and for 10000,  $\lambda_{10000}= 1.015$  .

## Manhattan Plot

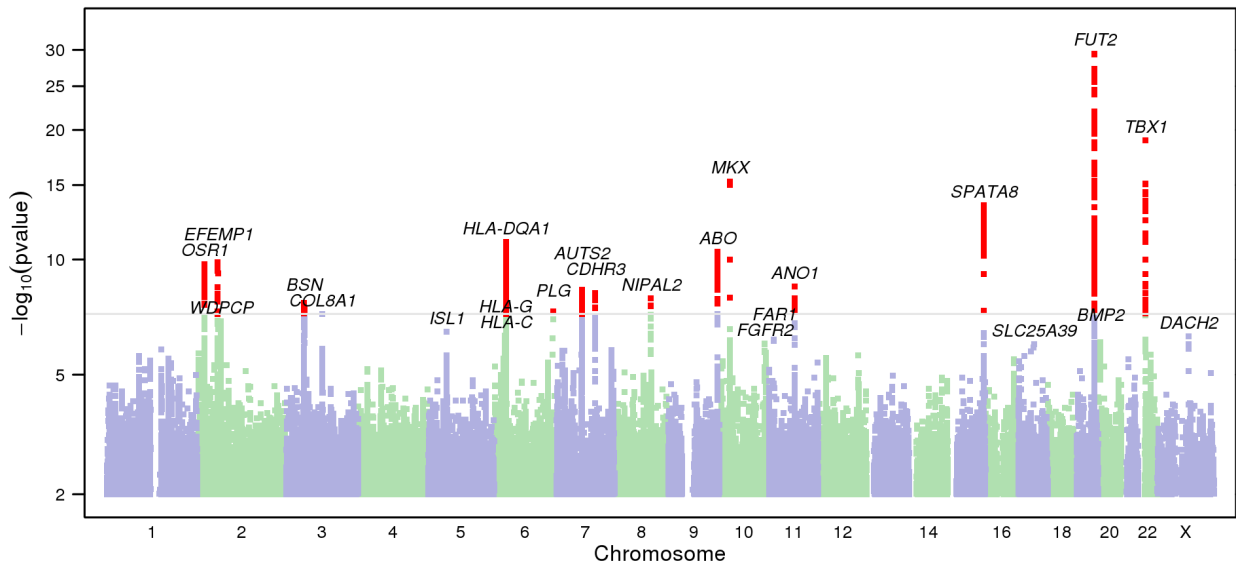

## Q-Q Plot of GWAS Results

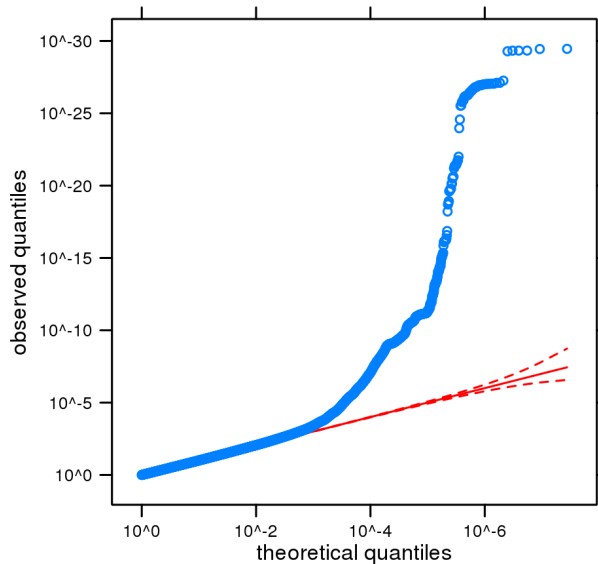

# Index SNPs for Strongest Associations

| cytoband | assay.name       | scaffold | position  | alleles | src | pvalue                | OR    | 95% CI        | gene.context              |
|----------|------------------|----------|-----------|---------|-----|-----------------------|-------|---------------|---------------------------|
| 19q13.33 | rs681343         | chr19    | 49206462  | C/T     | I   | 3.5×10 <sup>-30</sup> | 0.905 | [0.889,0.920] | [FUT2]                    |
| 22q11.21 | rs1978060        | chr22    | 19749525  | A/G     | I   | 1.2×10 <sup>-19</sup> | 1.089 | [1.069,1.109] | [TBX1]                    |
| 10p12.1  | rs2808290        | chr10    | 27900882  | C/T     | I   | 5.1×10 <sup>-16</sup> | 0.930 | [0.914,0.947] | RAB18--[ ]--MKX           |
| 15q26.2  | rs7174062        | chr15    | 97452829  | A/G     | I   | 3.5×10 <sup>-14</sup> | 1.077 | [1.057,1.098] | SPATA8---[ ]---LINC00923  |
| 6p21.32  | rs4329147        | chr6     | 32566577  | C/T     | I   | 9.5×10 <sup>-12</sup> | 1.111 | [1.078,1.146] | HLA-DRB5--[ ]--HLA-DQA1   |
| 9q34.2   | 9:136149095:CA_C | chr9     | 136149095 | D/I     | I   | 3.7×10 <sup>-11</sup> | 0.942 | [0.925,0.959] | [ABO]                     |
| 2p16.1   | rs1802575        | chr2     | 56093204  | C/G     | I   | 1.5×10 <sup>-10</sup> | 1.088 | [1.061,1.117] | [EFEMP1]                  |
| 2p24.1   | rs5829676        | chr2     | 19274784  | D/I     | I   | 1.8×10 <sup>-10</sup> | 0.945 | [0.929,0.961] | NT5C1B-RDH14---[ ]---OSR1 |
| 11q13.3  | rs72931768       | chr11    | 69829717  | C/G     | I   | 2.6×10 <sup>-9</sup>  | 1.086 | [1.057,1.116] | FGF3---[ ]--ANO1          |
| 7q11.22  | rs35213789       | chr7     | 69268012  | C/T     | I   | 3.7×10 <sup>-9</sup>  | 0.943 | [0.925,0.962] | [AUTS2]                   |
| 7q22.3   | rs114947103      | chr7     | 105658927 | C/T     | I   | 5.4×10 <sup>-9</sup>  | 0.935 | [0.914,0.956] | [CDHR3]                   |
| 8q22.2   | rs13281988       | chr8     | 99372329  | C/G     | I   | 9.8×10 <sup>-9</sup>  | 0.947 | [0.930,0.965] | NIPAL2--[ ]--KCNS2        |
| 3p21.31  | rs67035515       | chr3     | 49656530  | D/I     | I   | 1.6×10 <sup>-8</sup>  | 1.067 | [1.043,1.091] | [BSN]                     |
| 6q26     | rs73015965       | chr6     | 161127501 | A/G     | I   | 3.8×10 <sup>-8</sup>  | 1.434 | [1.262,1.630] | [PLG]                     |
| 3q12.1   | rs151208372      | chr3     | 99171868  | A/T     | I   | 5.0×10 <sup>-8</sup>  | 1.094 | [1.059,1.130] | DCBLD2---[ ]---COL8A1     |
| 2p15     | rs11405769       | chr2     | 63658293  | D/I     | I   | 1.1×10 <sup>-7</sup>  | 0.950 | [0.932,0.968] | [WDPCP]                   |
| 5q11.1   | rs62366894       | chr5     | 50631991  | C/T     | I   | 2.8×10 <sup>-7</sup>  | 0.943 | [0.922,0.964] | PARP8---[ ]--ISL1         |
| 6p22.1   | rs34590927       | chr6     | 29809784  | D/I     | I   | 4.0×10 <sup>-7</sup>  | 0.940 | [0.918,0.963] | HLA-G--[ ]--HLA-H         |
| 6p21.33  | rs3130436        | chr6     | 31220783  | A/G     | I   | 4.2×10 <sup>-7</sup>  | 0.949 | [0.930,0.968] | HCG27--[ ]--HLA-C         |
| Xq21.2   | rs183992155      | chrX     | 85858185  | A/T     | I   | 4.2×10 <sup>-7</sup>  | 0.268 | [0.143,0.503] | [DACH2]                   |
| 11p15.2  | rs187558225      | chr11    | 13656956  | C/G     | I   | 5.6×10 <sup>-7</sup>  | 0.520 | [0.398,0.678] | PTH---[ ]--FAR1           |
| 20p12.3  | rs6085792        | chr20    | 6960528   | C/T     | I   | 7.3×10 <sup>-7</sup>  | 0.956 | [0.939,0.973] | BMP2---[ ]---HAO1         |
| 10q26.13 | rs41258305       | chr10    | 123357482 | C/T     | I   | 7.9×10 <sup>-7</sup>  | 1.096 | [1.057,1.137] | [FGFR2]                   |
| 17q21.31 | rs76477327       | chr17    | 42398997  | C/T     | I   | 8.6×10 <sup>-7</sup>  | 1.177 | [1.104,1.256] | [SLC25A39]                |

# Quality Statistics for Index SNPs

| assay.name       | is.v2 | is.v3 | is.v4 | gt.rate | hw.p.value           | p.date | freq.b | avg.rsqr | min.rsqr | p.batch               | dose.b | qc.mask |
|------------------|-------|-------|-------|---------|----------------------|--------|--------|----------|----------|-----------------------|--------|---------|
| rs681343         | FALSE | TRUE  | FALSE | 0.9986  | 0.26                 | 0.64   | 0.4816 | 0.9997   | 0.9976   | 0.42                  | 0.4821 | v2v3v4  |
| rs1978060        | FALSE | FALSE | FALSE |         |                      |        |        | 0.9081   | 0.8821   | 0.0052                | 0.5998 | v2v3v4  |
| rs2808290        | FALSE | FALSE | FALSE |         |                      |        |        | 0.9617   | 0.9538   | 0.36                  | 0.4946 | v2v3v4  |
| rs7174062        | FALSE | FALSE | FALSE |         |                      |        |        | 0.9975   | 0.9944   | 0.23                  | 0.7297 | v2v3v4  |
| rs4329147        | FALSE | FALSE | FALSE |         |                      |        |        | 0.7160   | 0.5594   | 4.4×10 <sup>-13</sup> | 0.8301 | v3      |
| 9:136149095:CA_C | FALSE | FALSE | FALSE |         |                      |        |        | 0.9931   | 0.9848   | 0.031                 | 0.6363 | v2v3v4  |
| rs1802575        | FALSE | FALSE | FALSE |         |                      |        |        | 0.9915   | 0.9870   | 0.0084                | 0.8729 | v2v3v4  |
| rs5829676        | FALSE | FALSE | FALSE |         |                      |        |        | 0.9986   | 0.9979   | 0.66                  | 0.6039 | v2v3v4  |
| rs72931768       | FALSE | FALSE | FALSE |         |                      |        |        | 0.9395   | 0.8109   | 1.4×10 <sup>-17</sup> | 0.8791 | v2v3v4  |
| rs35213789       | FALSE | FALSE | FALSE |         |                      |        |        | 0.9941   | 0.9847   | 0.0096                | 0.2612 | v2v3v4  |
| rs114947103      | FALSE | FALSE | FALSE |         |                      |        |        | 0.9682   | 0.8696   | 1.9×10 <sup>-8</sup>  | 0.8219 | v2v3v4  |
| rs13281988       | FALSE | FALSE | FALSE |         |                      |        |        | 0.9917   | 0.9895   | 0.26                  | 0.6920 | v2v3v4  |
| rs67035515       | FALSE | FALSE | FALSE |         |                      |        |        | 0.9732   | 0.9290   | 9.8×10 <sup>-28</sup> | 0.1807 | v2v3v4  |
| rs73015965       | FALSE | TRUE  | TRUE  | 0.9997  | 4.1×10 <sup>-5</sup> | 0.15   | 0.0052 | 0.9874   | 0.9756   | 0.27                  | 0.0051 | v3      |
| rs151208372      | FALSE | FALSE | FALSE |         |                      |        |        | 0.9669   | 0.9440   | 0.10                  | 0.9207 | v2v3v4  |
| rs11405769       | FALSE | FALSE | FALSE |         |                      |        |        | 0.9646   | 0.9464   | 0.0015                | 0.7097 | v2v3v4  |
| rs62366894       | FALSE | FALSE | FALSE |         |                      |        |        | 0.9174   | 0.9015   | 0.027                 | 0.1965 | v2v3v4  |
| rs34590927       | FALSE | FALSE | FALSE |         |                      |        |        | 0.8677   | 0.8398   | 0.0068                | 0.1789 | v2v3v4  |
| rs3130436        | FALSE | FALSE | FALSE |         |                      |        |        | 0.9728   | 0.9577   | 0.00017               | 0.2375 | v2v3v4  |
| rs183992155      | FALSE | FALSE | FALSE |         |                      |        |        | 0.7172   | 0.4937   | 0.084                 | 0.0004 | v2v3v4  |
| rs187558225      | FALSE | FALSE | FALSE |         |                      |        |        | 0.6653   | 0.5410   | 0.0030                | 0.0019 | v2v3v4  |
| rs6085792        | FALSE | FALSE | FALSE |         |                      |        |        | 0.9657   | 0.9567   | 0.26                  | 0.3858 | v2v3v4  |
| rs41258305       | FALSE | FALSE | FALSE |         |                      |        |        | 0.9341   | 0.7914   | 0.084                 | 0.9356 | v2v3v4  |
| rs76477327       | FALSE | FALSE | FALSE |         |                      |        |        | 0.6369   | 0.5847   | 0.19                  | 0.0272 | v2v3v4  |

# SNP Statistics in the GWAS Sample

| assay.name       | AA.0  | AB.0  | BB.0  | im.num.0 | dose.b.0 | AA.1  | AB.1  | BB.1 | im.num.1 | dose.b.1 |
|------------------|-------|-------|-------|----------|----------|-------|-------|------|----------|----------|
| rs681343         | 15419 | 28787 | 14366 | 74874    | 0.4922   | 10192 | 18573 | 7875 | 46936    | 0.4691   |
| rs1978060        |       |       |       | 74874    | 0.5980   |       |       |      | 46936    | 0.6185   |
| rs2808290        |       |       |       | 74874    | 0.5017   |       |       |      | 46936    | 0.4847   |
| rs7174062        |       |       |       | 74874    | 0.7245   |       |       |      | 46936    | 0.7381   |
| rs4329147        |       |       |       | 58210    | 0.8250   |       |       |      | 36390    | 0.8350   |
| 9:136149095:CA_C |       |       |       | 74874    | 0.6418   |       |       |      | 46936    | 0.6296   |
| rs1802575        |       |       |       | 74874    | 0.8693   |       |       |      | 46936    | 0.8788   |
| rs5829676        |       |       |       | 74874    | 0.6067   |       |       |      | 46936    | 0.5926   |
| rs72931768       |       |       |       | 74874    | 0.8766   |       |       |      | 46936    | 0.8856   |
| rs35213789       |       |       |       | 74874    | 0.2643   |       |       |      | 46936    | 0.2523   |
| rs114947103      |       |       |       | 74874    | 0.8261   |       |       |      | 46936    | 0.8169   |
| rs13281988       |       |       |       | 74874    | 0.6974   |       |       |      | 46936    | 0.6868   |
| rs67035515       |       |       |       | 74874    | 0.1787   |       |       |      | 46936    | 0.1886   |
| rs73015965       | 69988 | 678   | 0     | 58210    | 0.0047   | 43670 | 594   | 0    | 36390    | 0.0069   |
| rs151208372      |       |       |       | 74874    | 0.9188   |       |       |      | 46936    | 0.9254   |
| rs11405769       |       |       |       | 74874    | 0.7122   |       |       |      | 46936    | 0.7011   |
| rs62366894       |       |       |       | 74874    | 0.1992   |       |       |      | 46936    | 0.1906   |
| rs34590927       |       |       |       | 74874    | 0.1811   |       |       |      | 46936    | 0.1738   |
| rs3130436        |       |       |       | 74874    | 0.2404   |       |       |      | 46936    | 0.2310   |
| rs183992155      |       |       |       | 74874    | 0.0006   |       |       |      | 46936    | 0.0002   |
| rs187558225      |       |       |       | 74874    | 0.0021   |       |       |      | 46936    | 0.0014   |

|            |       |        |       |        |
|------------|-------|--------|-------|--------|
| rs6085792  | 74874 | 0.3892 | 46936 | 0.3783 |
| rs41258305 | 74874 | 0.9347 | 46936 | 0.9403 |
| rs76477327 | 74874 | 0.0260 | 46936 | 0.0287 |

## Annotations from NHGRI GWAS Catalog

The following table shows, for each index SNP, all entries in the NHGRI GWAS Catalog that are within 500kb and in at least moderate linkage disequilibrium ( $r^2 > 0.5$ ).

| region   | position | our.name   | our.pval              | dist    | rsqr  | assay.name | pvalue                 | pubmed.id | trait                                            | genes                                       |
|----------|----------|------------|-----------------------|---------|-------|------------|------------------------|-----------|--------------------------------------------------|---------------------------------------------|
| 19q13.33 | 49206462 | rs681343   | $3.5 \times 10^{-30}$ | -290    | 1.000 | rs516246   | $2.0 \times 10^{-6}$   | 23251661  | Obesity-related traits                           | FUT2                                        |
| 19q13.33 | 49206462 | rs681343   | $3.5 \times 10^{-30}$ | -290    | 1.000 | rs516246   | $1.0 \times 10^{-15}$  | 23128233  | Crohn's disease                                  | DBP,SPHK2,IZUMO1,FUT2                       |
|          |          |            |                       |         |       |            |                        |           | Liver enzyme levels (gamma-glutamyl transferase) | FUT2                                        |
| 19q13.33 | 49206462 | rs681343   | $3.5 \times 10^{-30}$ | -290    | 1.000 | rs516246   | $8.0 \times 10^{-10}$  | 22001757  | Cholesterol, total                               | FUT2,FLJ36070                               |
| 19q13.33 | 49206462 | rs681343   | $3.5 \times 10^{-30}$ | -45     | 0.995 | rs492602   | $2.0 \times 10^{-10}$  | 20686565  | Vitamin B12 levels                               | FUT2                                        |
| 19q13.33 | 49206462 | rs681343   | $3.5 \times 10^{-30}$ | -45     | 0.995 | rs492602   | $5.0 \times 10^{-17}$  | 18776911  | Liver enzyme levels (alkaline phosphatase)       | FUT2                                        |
| 19q13.33 | 49206462 | rs681343   | $3.5 \times 10^{-30}$ | 141     | 0.697 | rs281377   | $1.0 \times 10^{-15}$  | 22001757  | Folate pathway vitamin levels                    | FUT2                                        |
| 19q13.33 | 49206462 | rs681343   | $3.5 \times 10^{-30}$ | 523     | 0.884 | rs602662   | $2.0 \times 10^{-15}$  | 19744961  | Folate pathway vitamin levels                    | FUT2                                        |
| 19q13.33 | 49206462 | rs681343   | $3.5 \times 10^{-30}$ | 523     | 0.884 | rs602662   | $3.0 \times 10^{-20}$  | 19303062  | Crohn's disease                                  | FUT2                                        |
| 19q13.33 | 49206462 | rs681343   | $3.5 \times 10^{-30}$ | 2403    | 0.879 | rs504963   | $2.0 \times 10^{-8}$   | 20570966  | Metabolic traits                                 | FUT2                                        |
| 19q13.33 | 49206462 | rs681343   | $3.5 \times 10^{-30}$ | 2548    | 0.884 | rs503279   | $4.0 \times 10^{-20}$  | 21886157  | Pubertal anthropometrics                         | MAMSTR                                      |
| 19q13.33 | 49206462 | rs681343   | $3.5 \times 10^{-30}$ | 7812    | 0.821 | rs281379   | $5.0 \times 10^{-8}$   | 23449627  | Crohn's disease                                  | FUT2,RASIP1                                 |
| 19q13.33 | 49206462 | rs681343   | $3.5 \times 10^{-30}$ | 7812    | 0.821 | rs281379   | $7.0 \times 10^{-12}$  | 21102463  | Bipolar disorder                                 | SPHK2, SEC1, ...                            |
| 19q13.33 | 49206462 | rs681343   | $3.5 \times 10^{-30}$ | 21810   | 0.653 | rs2287921  | $3.0 \times 10^{-6}$   | 21926972  | Retinal vascular caliber                         | RASIP1,IZUMO1,FUT1,FUT2,CA11,FGF21,FLJ36070 |
| 19q13.33 | 49206462 | rs681343   | $3.5 \times 10^{-30}$ | 21810   | 0.653 | rs2287921  | $2.0 \times 10^{-25}$  | 21060863  | Dietary macronutrient intake                     | FGF21                                       |
| 19q13.33 | 49206462 | rs681343   | $3.5 \times 10^{-30}$ | 42268   | 0.639 | rs838145   | $4.0 \times 10^{-10}$  | 23636237  | Interstitial lung disease                        |                                             |
| 6p21.32  | 32566577 | rs4329147  | $9.5 \times 10^{-12}$ | -376549 | 0.577 | rs3132946  | $8.0 \times 10^{-6}$   | 23583980  | Lumiracoxib-related liver injury                 | HLA-DRB1                                    |
| 6p21.32  | 32566577 | rs4329147  | $9.5 \times 10^{-12}$ | -260598 | 0.608 | rs3129900  | $7.0 \times 10^{-25}$  | 20639878  | Multiple sclerosis                               | C6orf10                                     |
| 6p21.32  | 32566577 | rs4329147  | $9.5 \times 10^{-12}$ | -230390 | 0.608 | rs3129934  | $7.0 \times 10^{-16}$  | 22457343  | Multiple sclerosis                               | HLA-DRB1                                    |
| 6p21.32  | 32566577 | rs4329147  | $9.5 \times 10^{-12}$ | -230390 | 0.608 | rs3129934  | $9.0 \times 10^{-11}$  | 18941528  | Hepatitis C induced liver cirrhosis              | Intergenic                                  |
| 6p21.32  | 32566577 | rs4329147  | $9.5 \times 10^{-12}$ | -165498 | 0.839 | rs3129860  | $1.0 \times 10^{-9}$   | 23321320  | Multiple sclerosis                               | HLA-DRB1                                    |
| 6p21.32  | 32566577 | rs4329147  | $9.5 \times 10^{-12}$ | -153526 | 0.819 | rs3135388  | $4.0 \times 10^{-225}$ | 19525953  | Multiple sclerosis                               | HLA-DRA                                     |
| 6p21.32  | 32566577 | rs4329147  | $9.5 \times 10^{-12}$ | -153526 | 0.819 | rs3135388  | $9.0 \times 10^{-81}$  | 17660530  | Multiple sclerosis                               | HLA-DRB1                                    |
| 6p21.32  | 32566577 | rs4329147  | $9.5 \times 10^{-12}$ | -153032 | 0.819 | rs3129889  | $1.0 \times 10^{-206}$ | 22190364  | Crohn's disease                                  | HLA-DRB5,HLA-DQA1,HLA-DRB1,HLA-DRA,BTNL2    |
| 6p21.32  | 32566577 | rs4329147  | $9.5 \times 10^{-12}$ | 20277   | 0.828 | rs9271366  | $5.0 \times 10^{-12}$  | 23850713  | Ulcerative colitis                               | HLA-DRB1, HLA-DQA1                          |
| 6p21.32  | 32566577 | rs4329147  | $9.5 \times 10^{-12}$ | 20277   | 0.828 | rs9271366  | $1.0 \times 10^{-18}$  | 23511034  | Inflammatory bowel disease                       | MHC                                         |
| 6p21.32  | 32566577 | rs4329147  | $9.5 \times 10^{-12}$ | 20277   | 0.828 | rs9271366  | $8.0 \times 10^{-11}$  | 21699788  | Immunoglobulin A                                 | HLA-DRB1                                    |
| 6p21.32  | 32566577 | rs4329147  | $9.5 \times 10^{-12}$ | 20277   | 0.828 | rs9271366  | $3.0 \times 10^{-33}$  | 20694011  | Multiple sclerosis                               | DQA1                                        |
| 6p21.32  | 32566577 | rs4329147  | $9.5 \times 10^{-12}$ | 20277   | 0.828 | rs9271366  | $4.0 \times 10^{-17}$  | 20598377  | Multiple sclerosis                               | HLA-DRB1                                    |
| 6p21.32  | 32566577 | rs4329147  | $9.5 \times 10^{-12}$ | 20277   | 0.828 | rs9271366  | $7.0 \times 10^{-184}$ | 19525955  | Multiple sclerosis (OCB status)                  | HLA-DQA1                                    |
| 6p21.32  | 32566577 | rs4329147  | $9.5 \times 10^{-12}$ | 25623   | 0.556 | rs9271640  | $2.0 \times 10^{-20}$  | 23472185  | Menarche (age at onset)                          | KLHDC8B                                     |
| 3p21.31  | 49656530 | rs67035515 | $1.6 \times 10^{-8}$  | -445798 | 0.512 | rs7617480  | $3.0 \times 10^{-8}$   | 21102462  |                                                  |                                             |

## Replication of GWAS Catalog Results

The following table shows, for each GWAS Catalog result for similar traits, our association test result for our best available proxy (distance < 100kb,  $r^2 > 0.8$ ).

*no relevant GWAS catalog terms were available*

## Nearby Nonsynonymous SNPs

| region   | position | our.name | our.pval              | dist  | rsqr  | assay.name | gene   | aa.chg |
|----------|----------|----------|-----------------------|-------|-------|------------|--------|--------|
| 19q13.33 | 49206462 | rs681343 | $3.5 \times 10^{-30}$ | 212   | 1.000 | rs601338   | FUT2   | W154*  |
| 19q13.33 | 49206462 | rs681343 | $3.5 \times 10^{-30}$ | 523   | 0.884 | rs602662   | FUT2   | G258S  |
| 19q13.33 | 49206462 | rs681343 | $3.5 \times 10^{-30}$ | 25764 | 0.652 | rs2287922  | RASIP1 | R601C  |

|         |           |             |                       |         |       |            |          |       |
|---------|-----------|-------------|-----------------------|---------|-------|------------|----------|-------|
| 6p21.32 | 32566577  | rs4329147   | $9.5 \times 10^{-12}$ | 43884   | 0.617 | rs9260     | HLA-DQA1 | M230V |
| 7q22.3  | 105658927 | rs114947103 | $5.4 \times 10^{-9}$  | -476    | 0.968 | rs6967330  | CDHR3    | C529Y |
| 6q26    | 161127501 | rs73015965  | $3.8 \times 10^{-8}$  | 0       | 1.000 | rs73015965 | PLG      | K38E  |
| 6p22.1  | 29809784  | rs34590927  | $4.0 \times 10^{-7}$  | -116773 | 0.694 | rs1736924  | HLA-F    | P272S |

## Nearby Expression QTLs

| region  | position | our.name   | our.pval             | dist    | rsqr  | assay.name | eqtl.dist | eqtl.gene | eqtl.pval             | eqtl.rsqr | tissue         | pubmed.id |
|---------|----------|------------|----------------------|---------|-------|------------|-----------|-----------|-----------------------|-----------|----------------|-----------|
| 3p21.31 | 49656530 | rs67035515 | $1.6 \times 10^{-8}$ | -470794 | 0.512 | rs7617480  | -169201   | P4HTM     | $7.6 \times 10^{-5}$  |           | Lymphoblastoid | 20220756  |
| 3p21.31 | 49656530 | rs67035515 | $1.6 \times 10^{-8}$ | -470794 | 0.512 | rs7617480  | -722595   | ATRIP     | 0.00065               |           | Lymphoblastoid | 20220756  |
| 3p21.31 | 49656530 | rs67035515 | $1.6 \times 10^{-8}$ | -442893 | 0.512 | rs9586     | 900845    | RBM6      | 0.00061               | 0.041     | B-Cell         | 22446964  |
| 3p21.31 | 49656530 | rs67035515 | $1.6 \times 10^{-8}$ | -65902  | 0.841 | rs11130208 | -209763   | RHOA      | $2.0 \times 10^{-5}$  |           | Lymphoblastoid | 20220756  |
| 3p21.31 | 49656530 | rs67035515 | $1.6 \times 10^{-8}$ | -14503  | 0.831 | rs4241405  | 181841    | AMT       | $5.9 \times 10^{-8}$  | 0.076     | Lymphoblastoid | 24037378  |
| 3p21.31 | 49656530 | rs67035515 | $1.6 \times 10^{-8}$ | 80793   | 0.981 | rs11130217 | -282976   | AMT       | 0.00025               | 0.047     | B-Cell         | 22446964  |
| 3p21.31 | 49656530 | rs67035515 | $1.6 \times 10^{-8}$ | 221734  | 0.971 | rs1996663  | 116880    | GMPPB     | $2.7 \times 10^{-6}$  | 0.017     | Monocyte       | 20502693  |
| 2p15    | 63658293 | rs11405769 | $1.1 \times 10^{-7}$ | -228118 | 0.720 | rs12151606 | 178939    | C2ORF86   | 0.00010               | 0.053     | Monocyte       | 22446964  |
| 2p15    | 63658293 | rs11405769 | $1.1 \times 10^{-7}$ | 75728   | 0.890 | rs262487   | -64395    | MDH1      | $5.4 \times 10^{-11}$ |           | Liver          | 18462017  |
| 6p22.1  | 29809784 | rs34590927 | $4.0 \times 10^{-7}$ | -184783 | 0.675 | rs3130250  | 409485    | PPP1R11   | $1.5 \times 10^{-8}$  | 0.022     | Monocyte       | 20502693  |
| 6p22.1  | 29809784 | rs34590927 | $4.0 \times 10^{-7}$ | -76409  | 0.729 | rs1737058  | 887751    | DHX16     | 0.00029               | 0.047     | B-Cell         | 22446964  |
| 6p22.1  | 29809784 | rs34590927 | $4.0 \times 10^{-7}$ | -76409  | 0.729 | rs1737058  | -162815   | GABBR1    | $1.2 \times 10^{-5}$  | 0.068     | Monocyte       | 22446964  |
| 6p22.1  | 29809784 | rs34590927 | $4.0 \times 10^{-7}$ | -76409  | 0.729 | rs1737058  | -861252   | TRIM27    | $3.8 \times 10^{-5}$  | 0.060     | Monocyte       | 22446964  |
| 6p22.1  | 29809784 | rs34590927 | $4.0 \times 10^{-7}$ | 22548   | 0.564 | rs2524035  | 628390    | HLA-E     | 0.00012               | 0.052     | B-Cell         | 22446964  |
| 6p22.1  | 29809784 | rs34590927 | $4.0 \times 10^{-7}$ | 107362  | 0.796 | rs1655904  | 622024    | ABCF1     | $6.0 \times 10^{-9}$  | 0.025     | Monocyte       | 20502693  |
| 6p22.1  | 29809784 | rs34590927 | $4.0 \times 10^{-7}$ | 107362  | 0.796 | rs1655904  | 750439    | MDC1      | $2.8 \times 10^{-6}$  | 0.017     | Monocyte       | 20502693  |
| 6p21.33 | 31220783 | rs3130436  | $4.2 \times 10^{-7}$ | 11328   | 0.633 | rs3130542  | -2000400  | LOC646317 | 0.00064               | 0.041     | Monocyte       | 22446964  |

## Nearby Clinical Variants

| source  | region   | our.name | our.pval              | dist | rsqr  | assay.name | gene | phenotype                                           | accession     |
|---------|----------|----------|-----------------------|------|-------|------------|------|-----------------------------------------------------|---------------|
| clinvar | 19q13.33 | rs681343 | $3.5 \times 10^{-30}$ | 212  | 1.000 | rs601338   | FUT2 | Vitamin b12 plasma level quantitative trait locus 1 | NCBI curation |

## Regional Association Plots

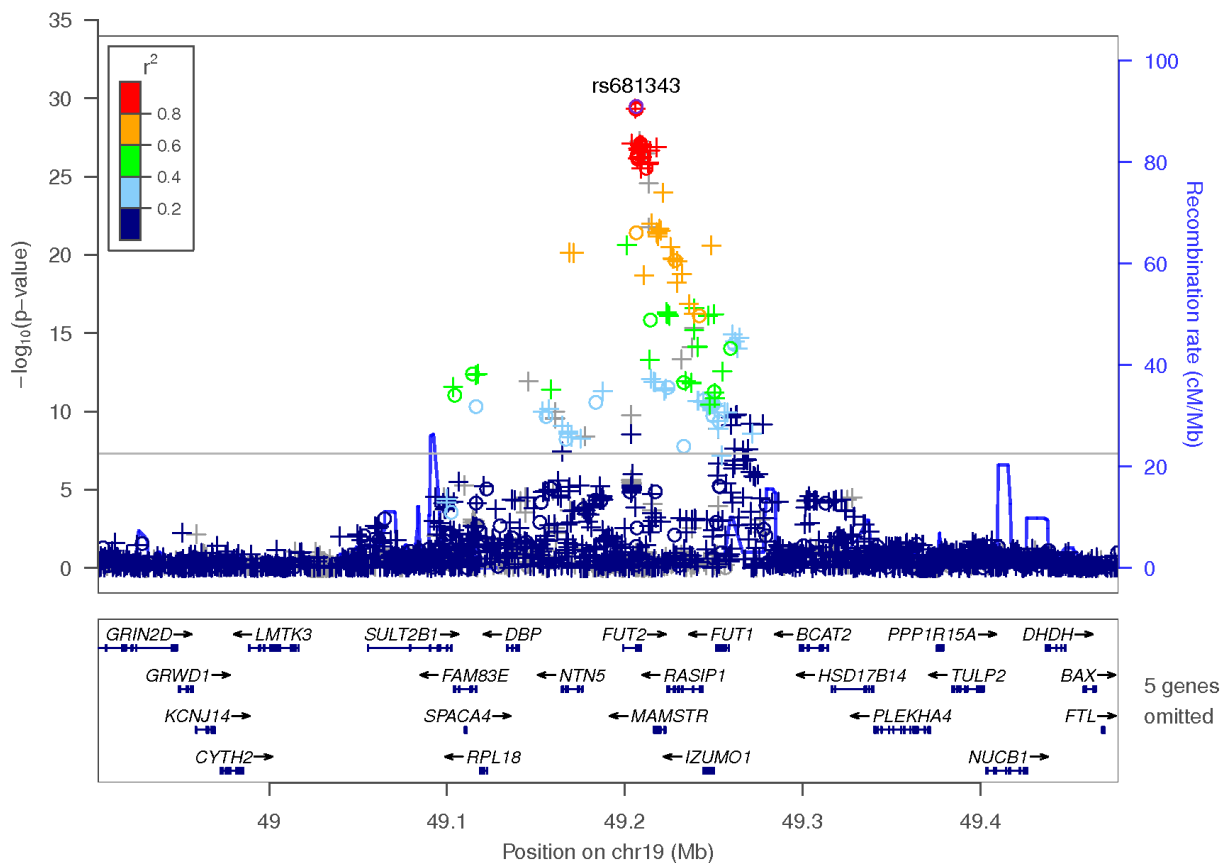

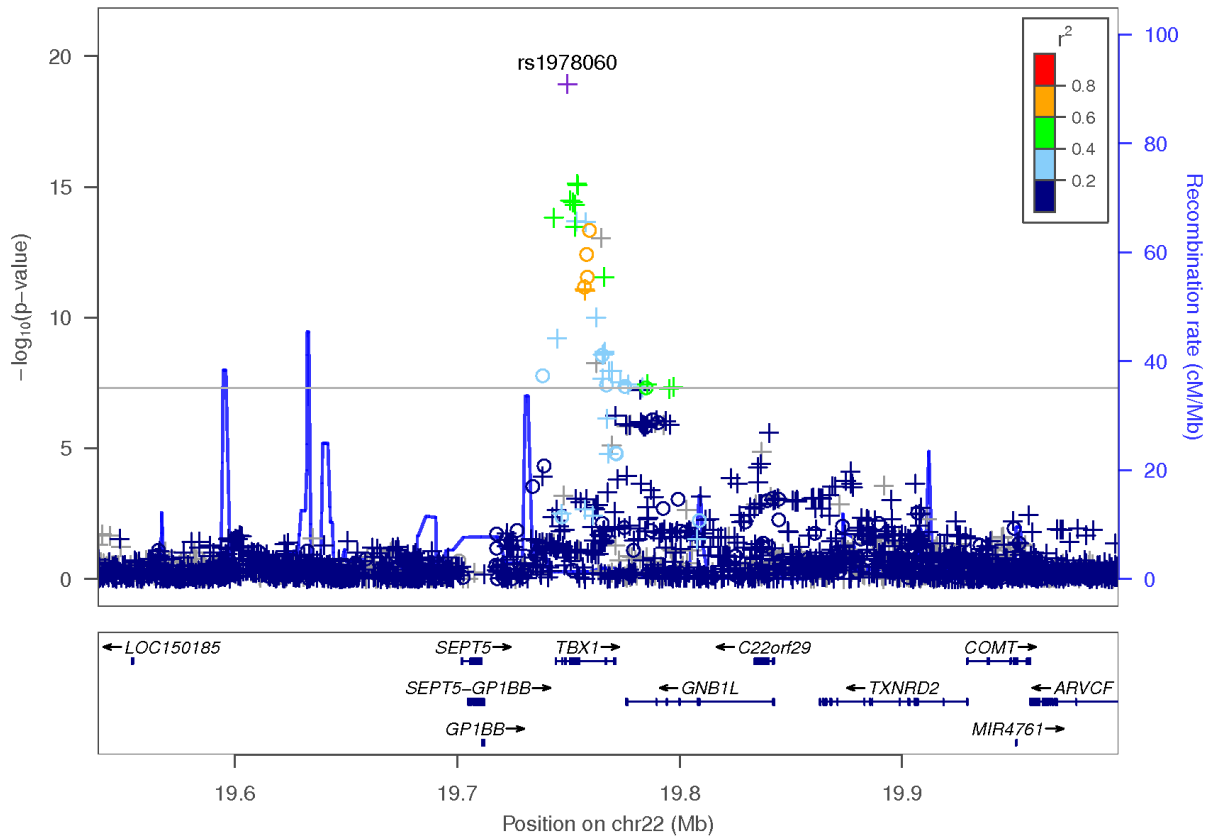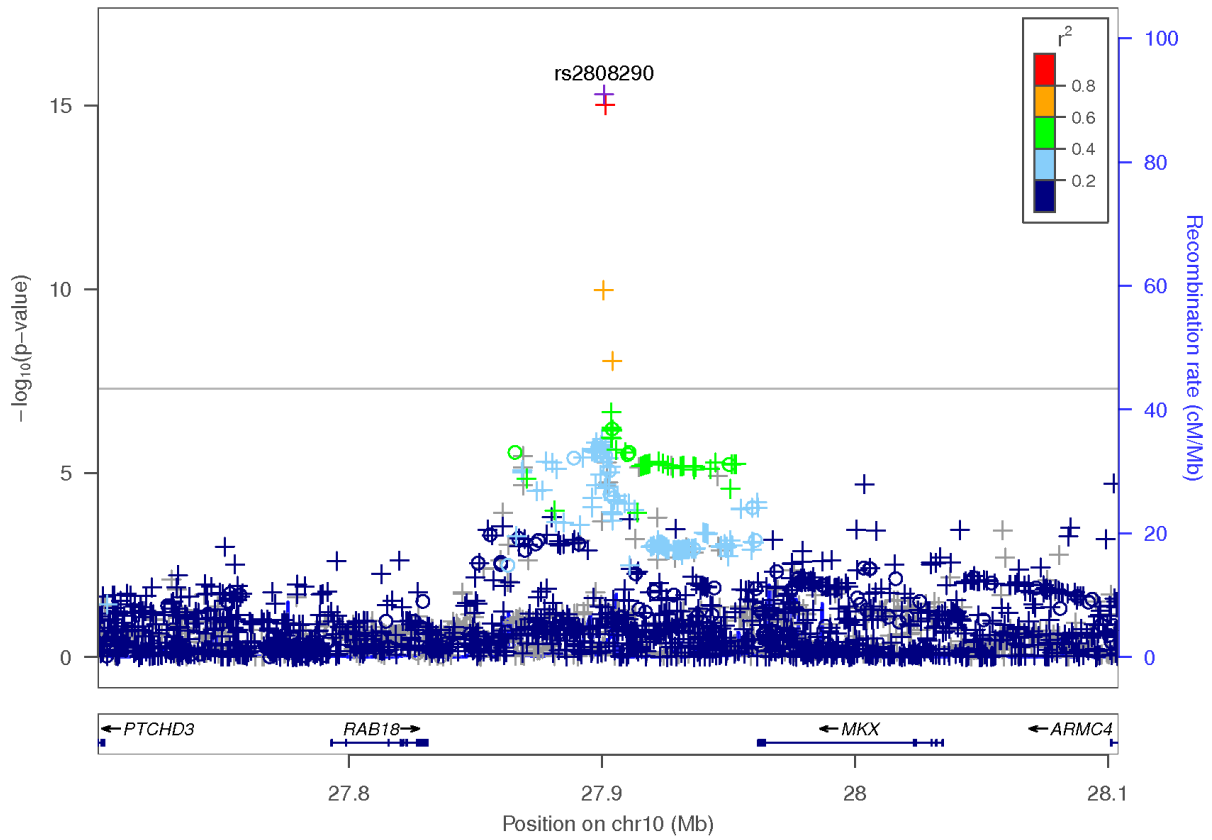

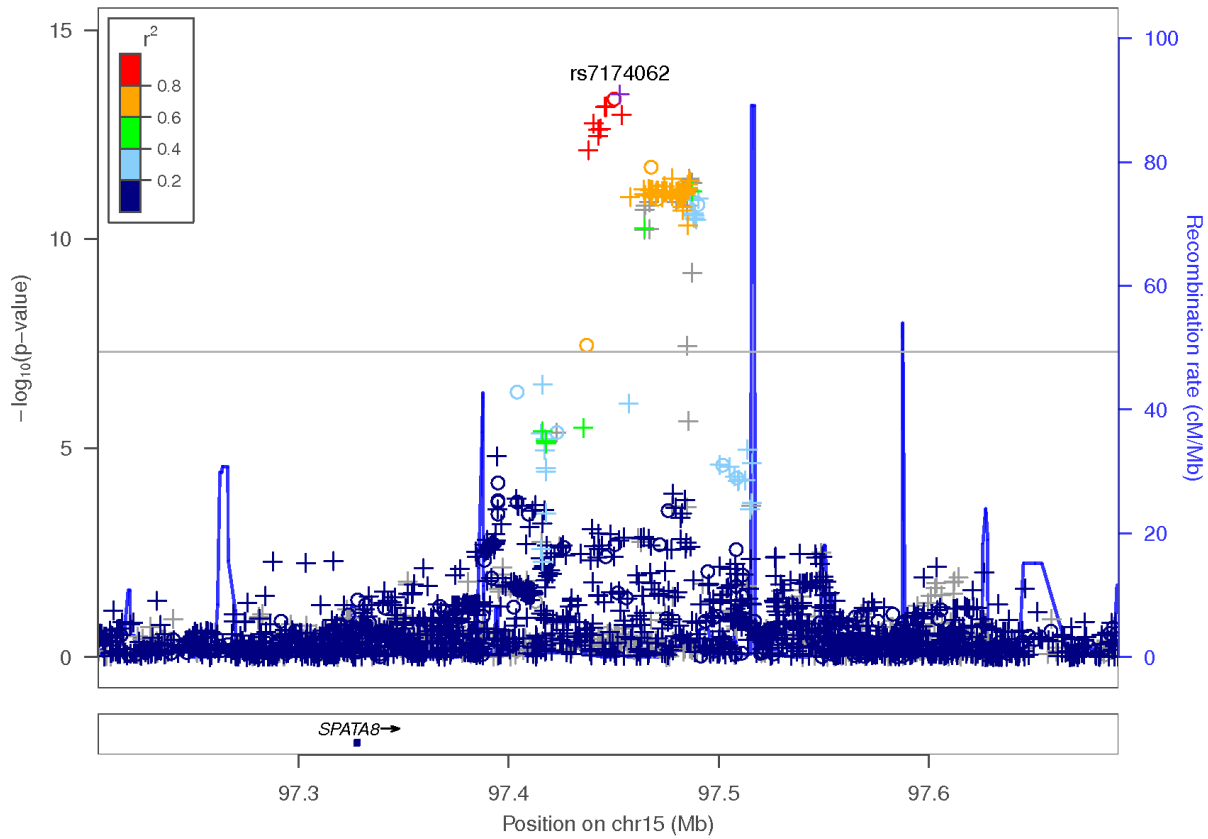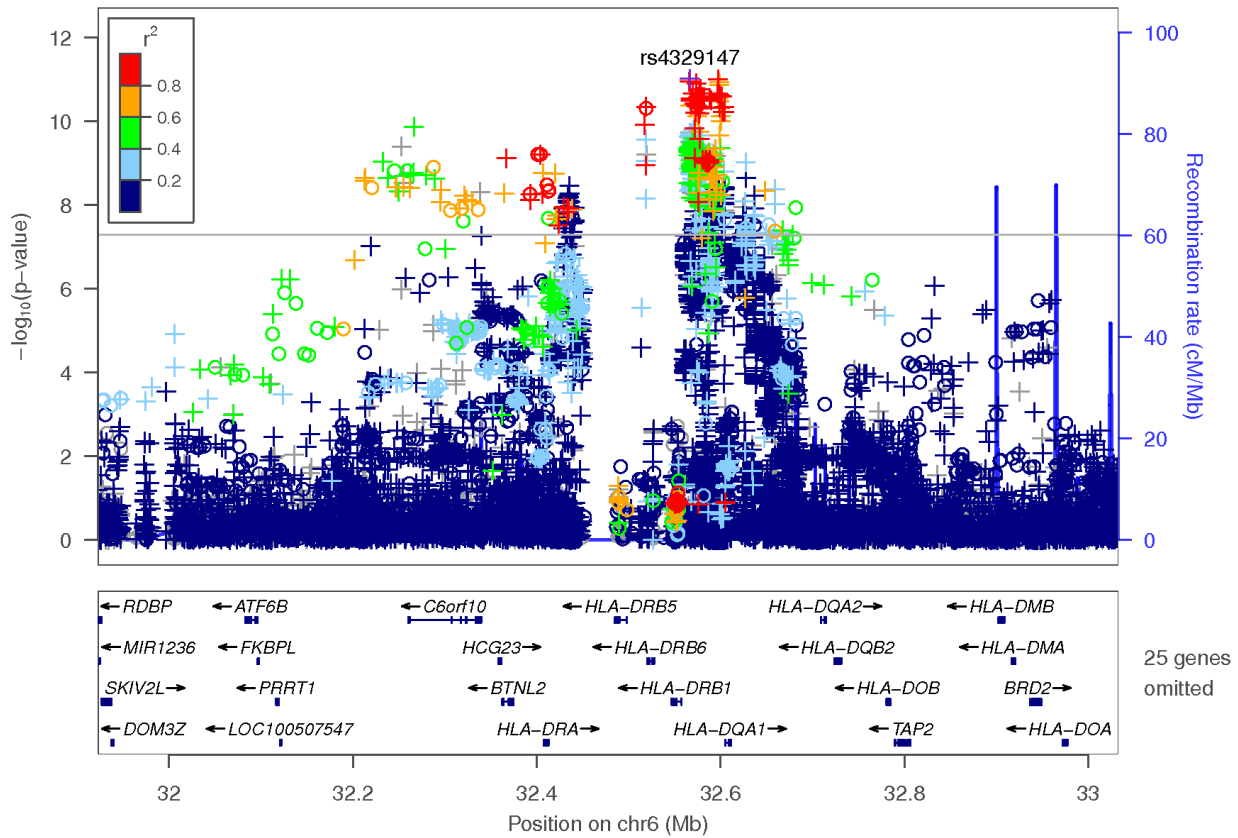

locuszoom plot for 9:136149095:CA\_C failed

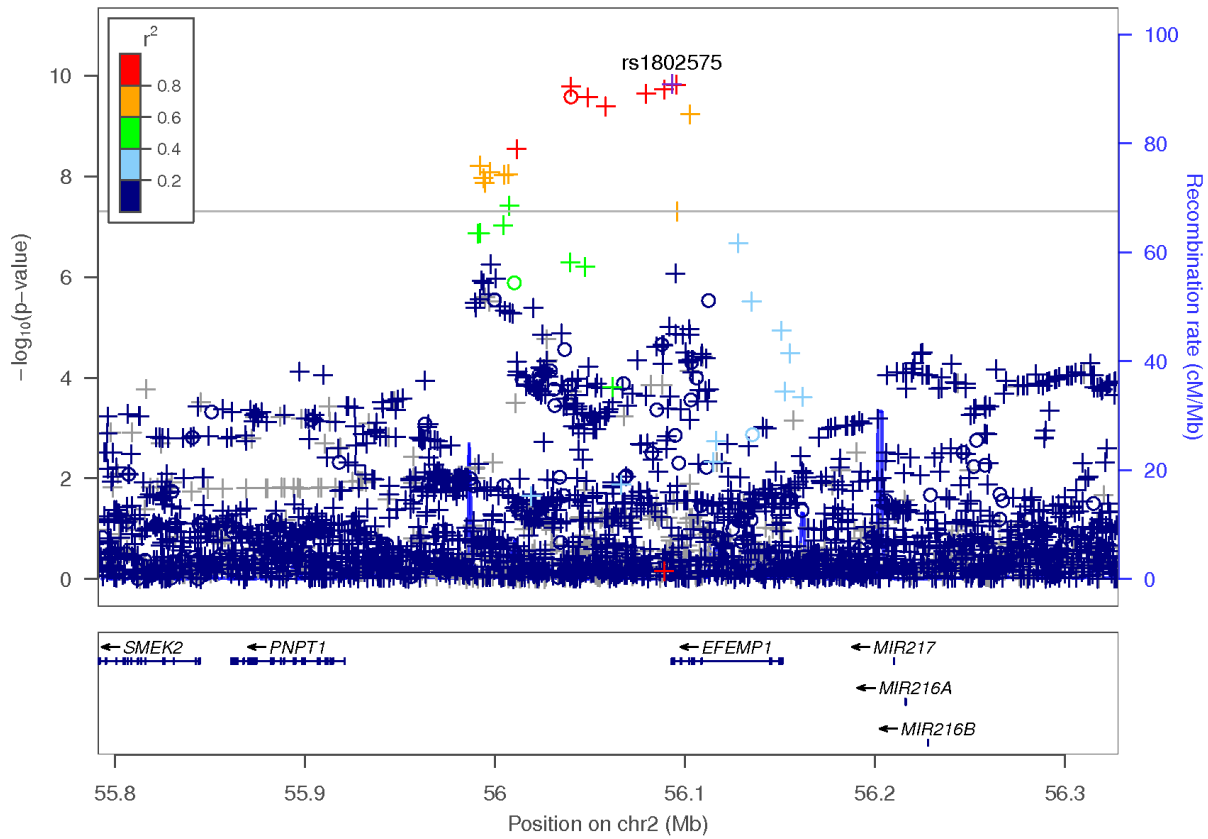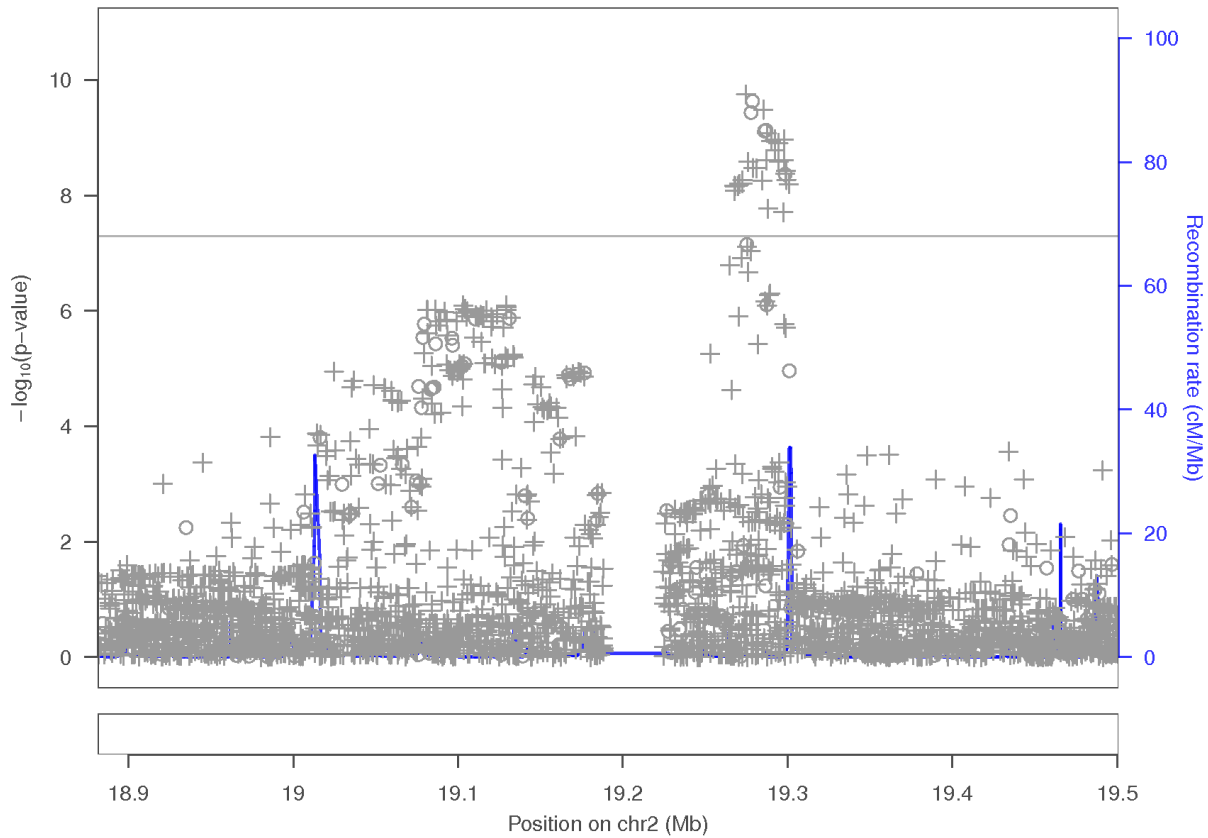



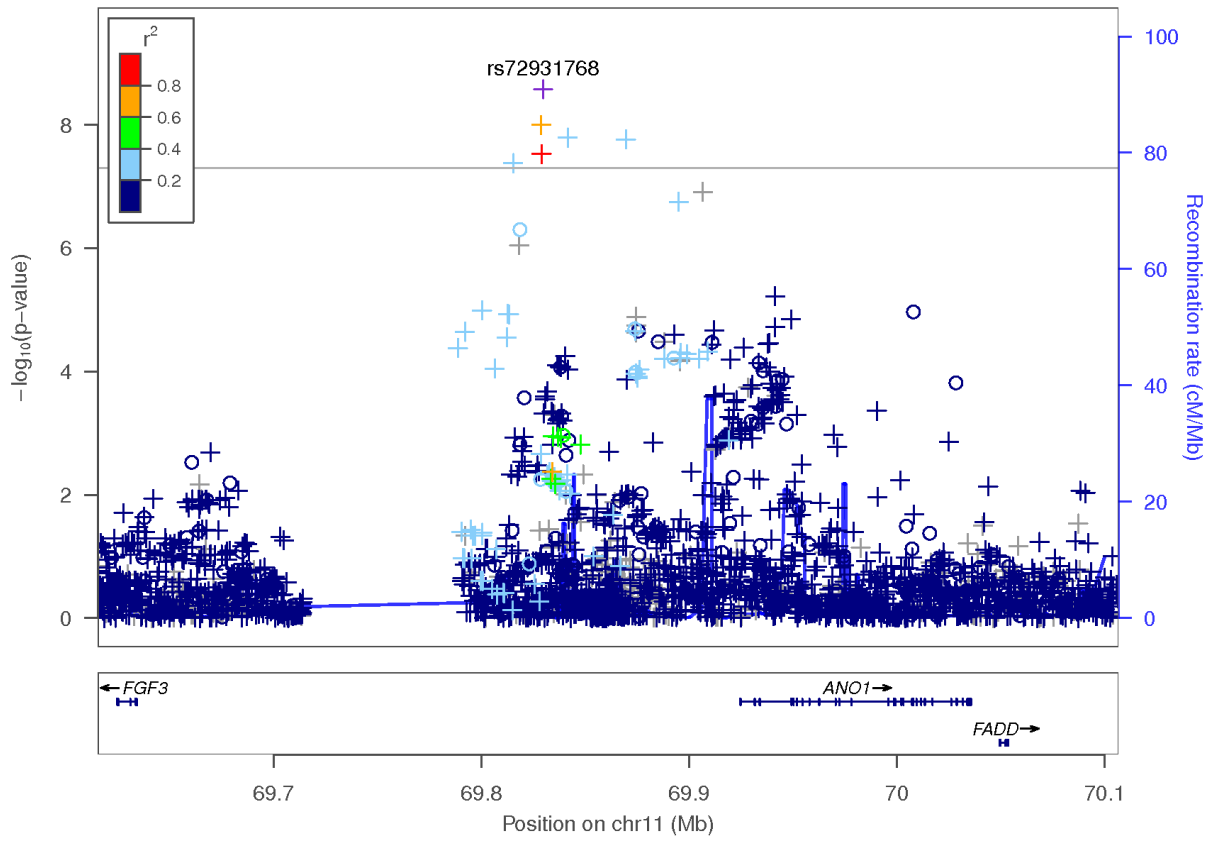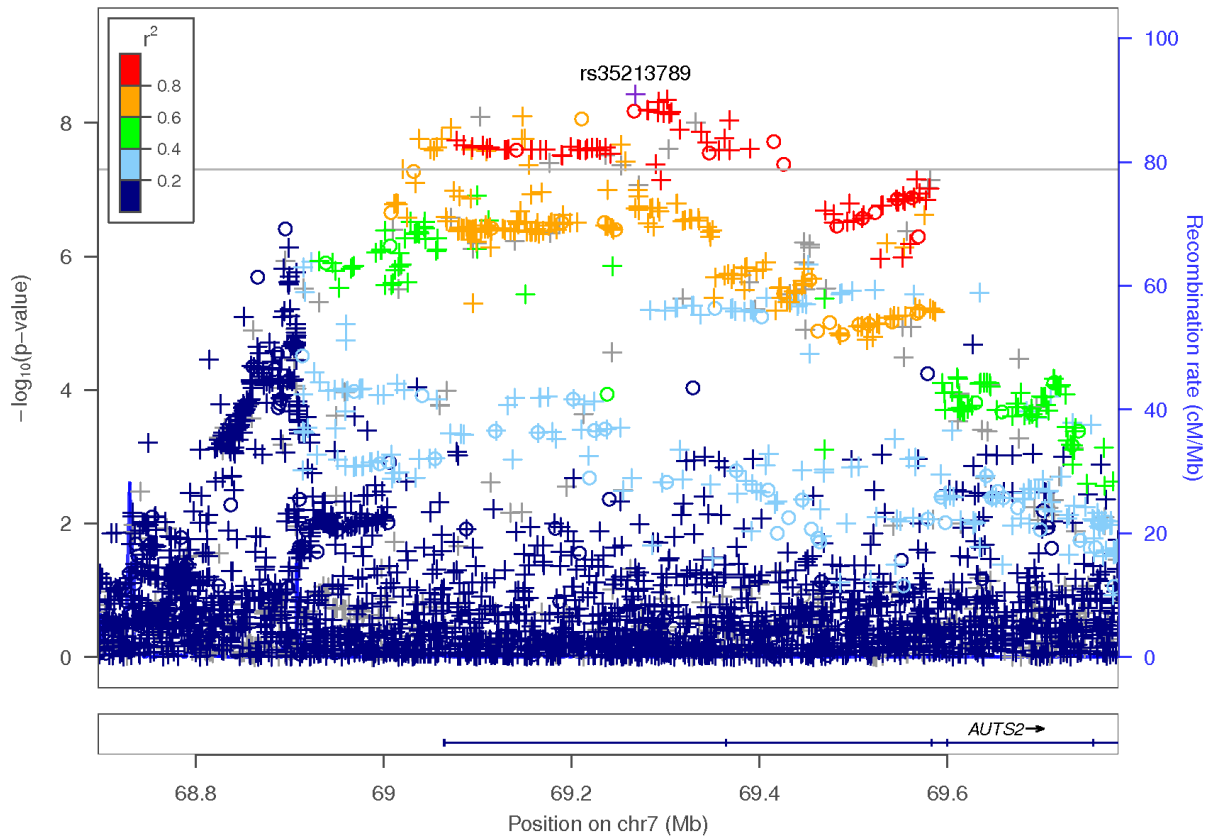

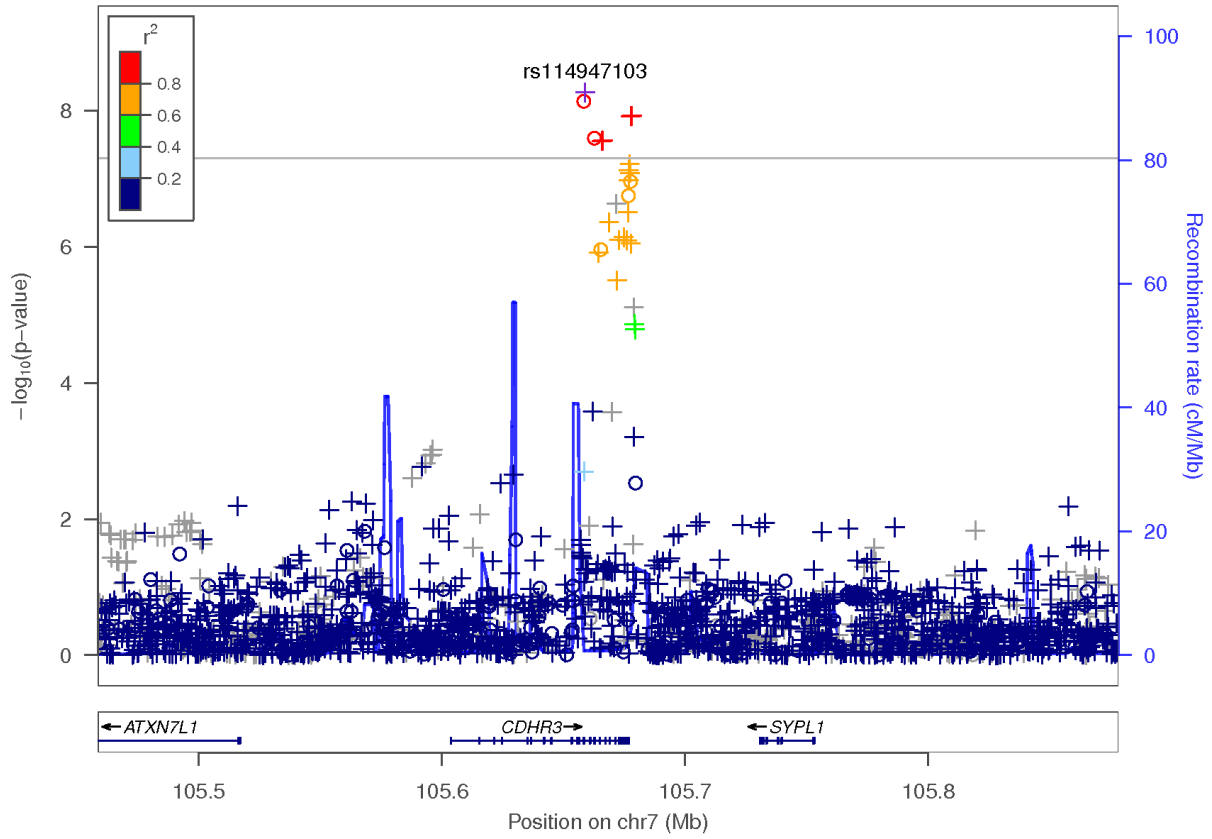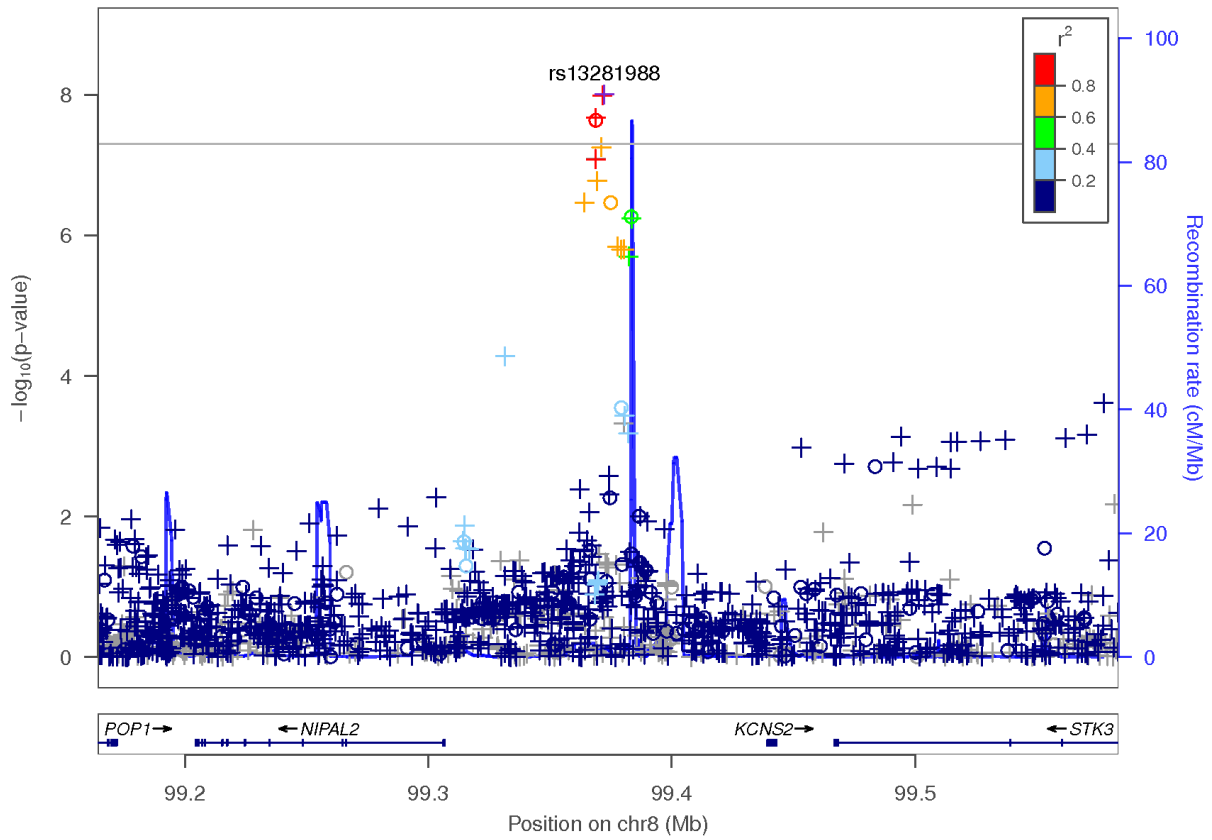

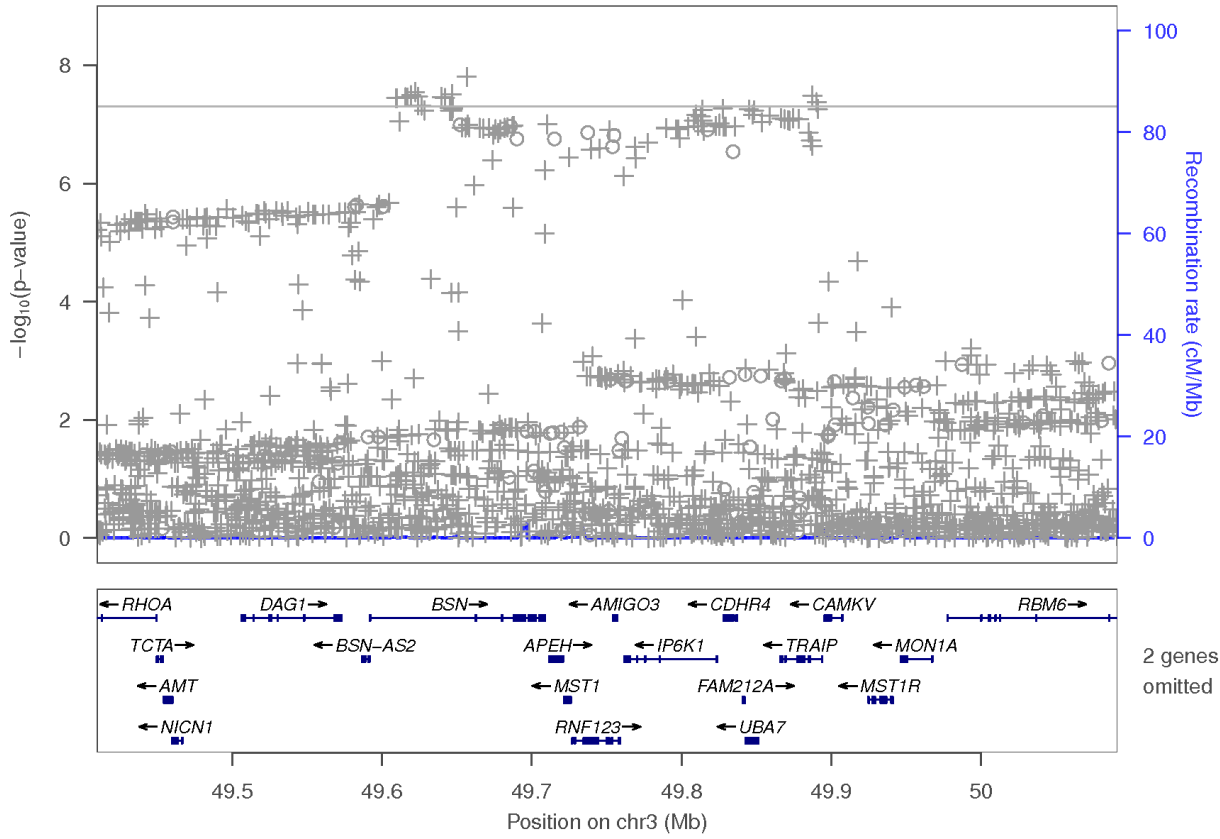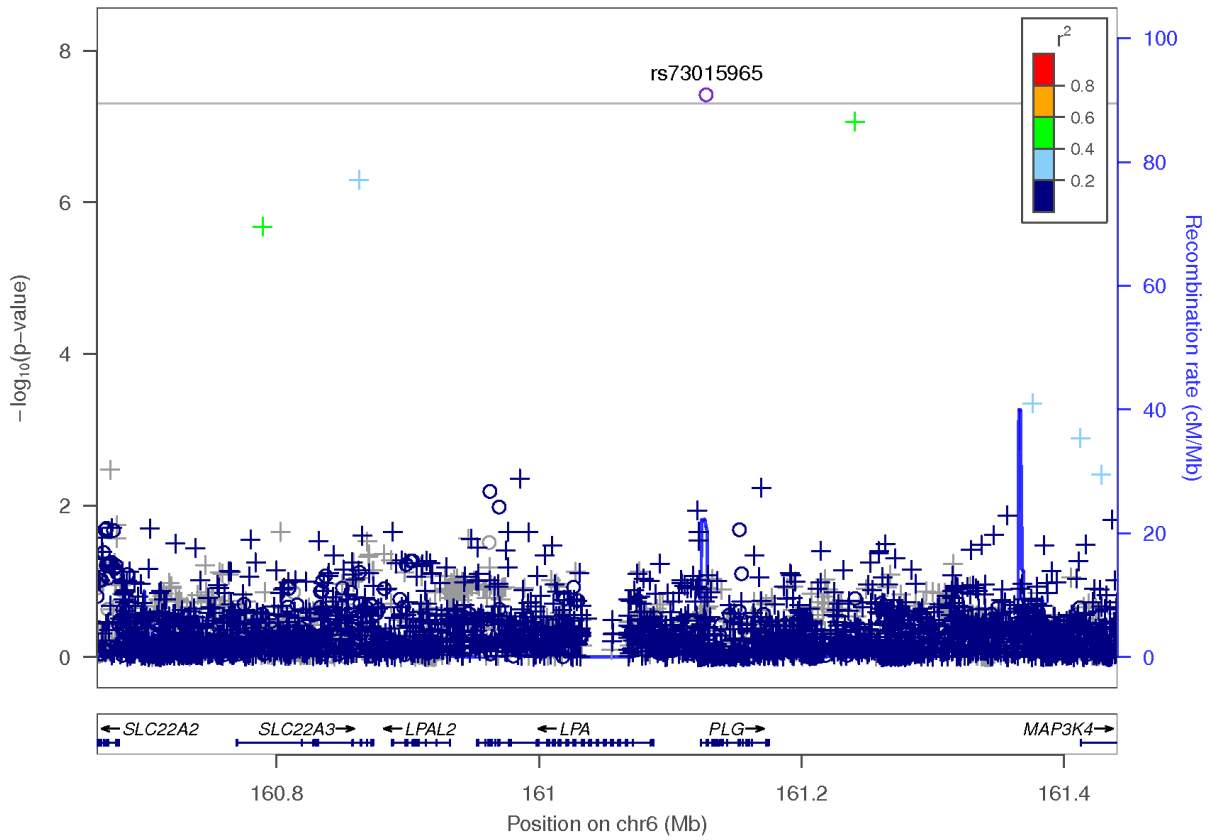

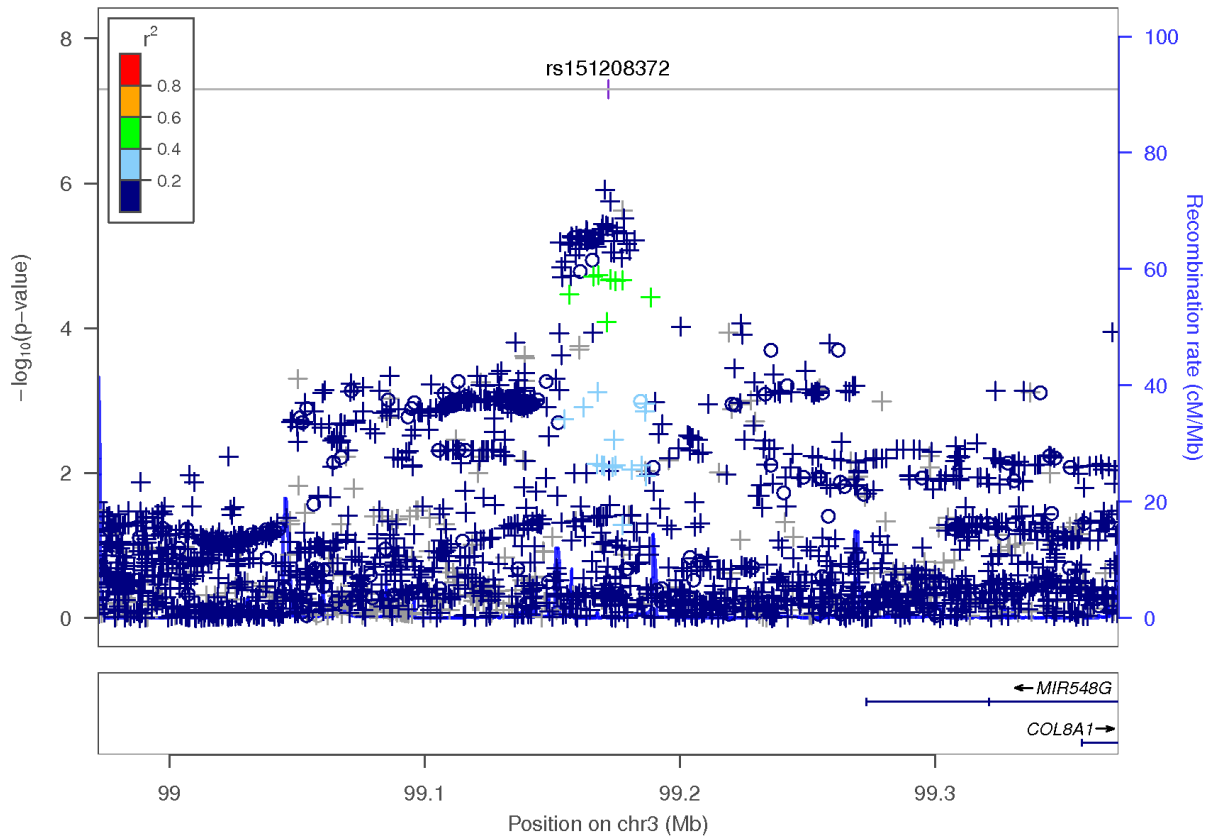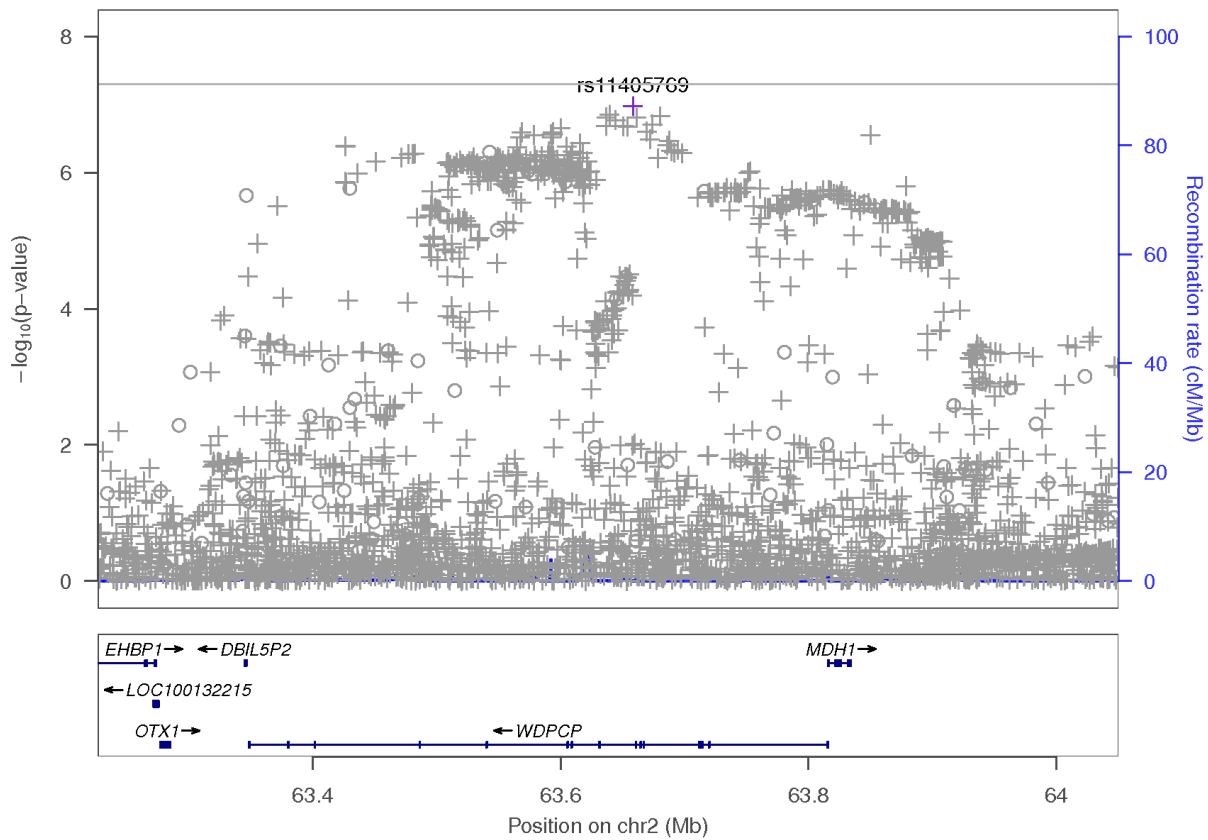

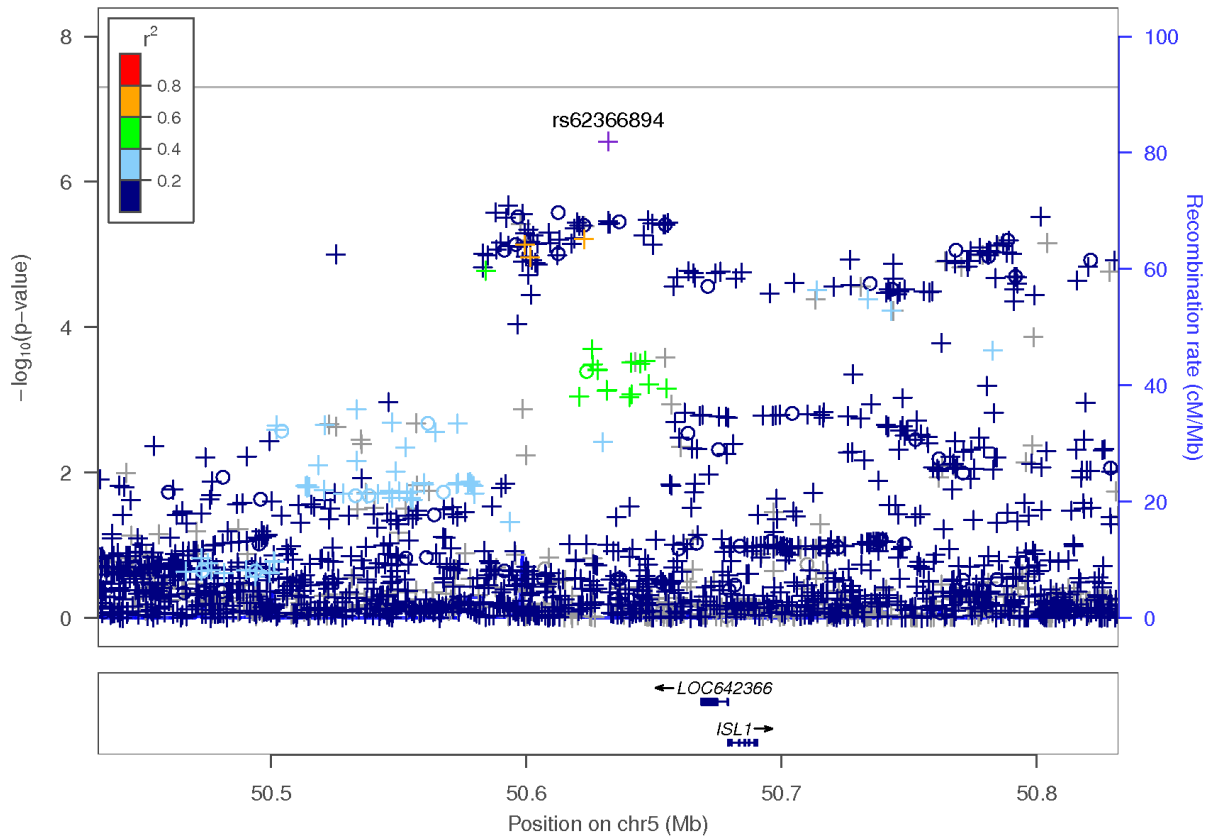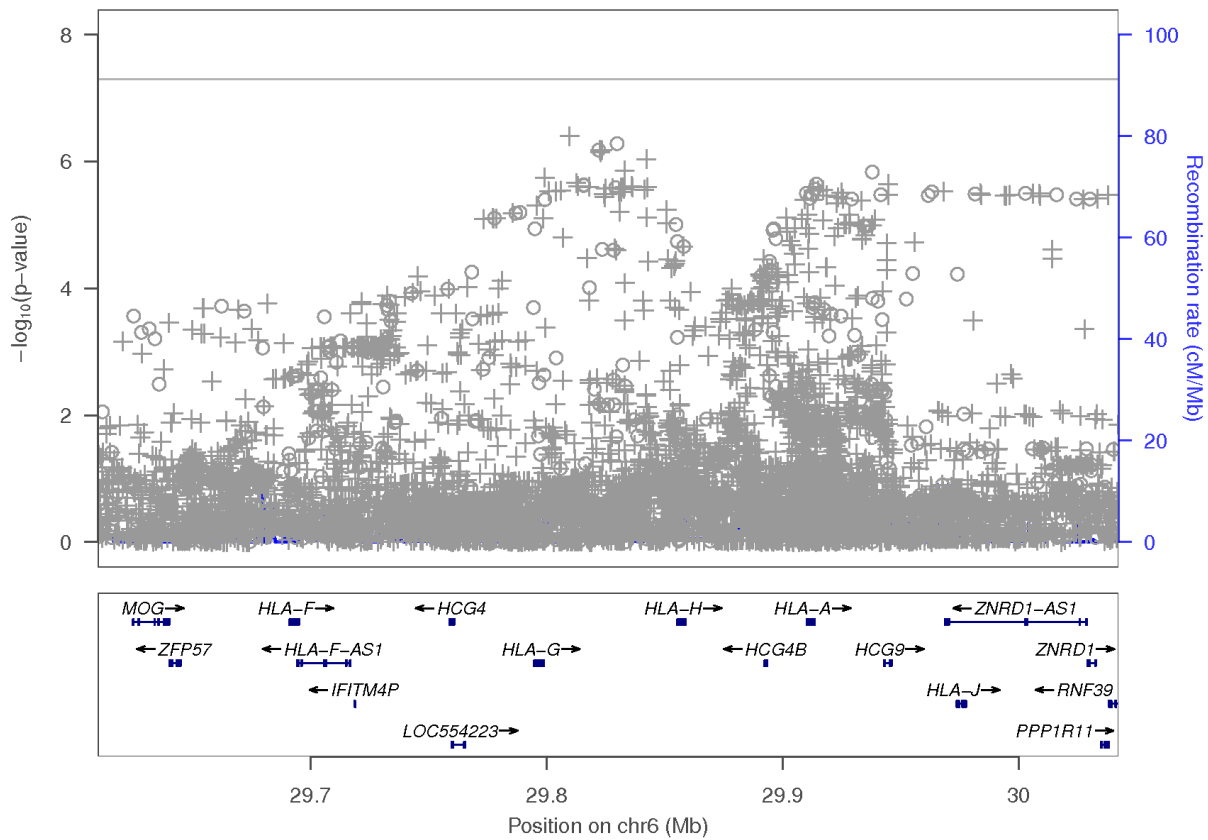

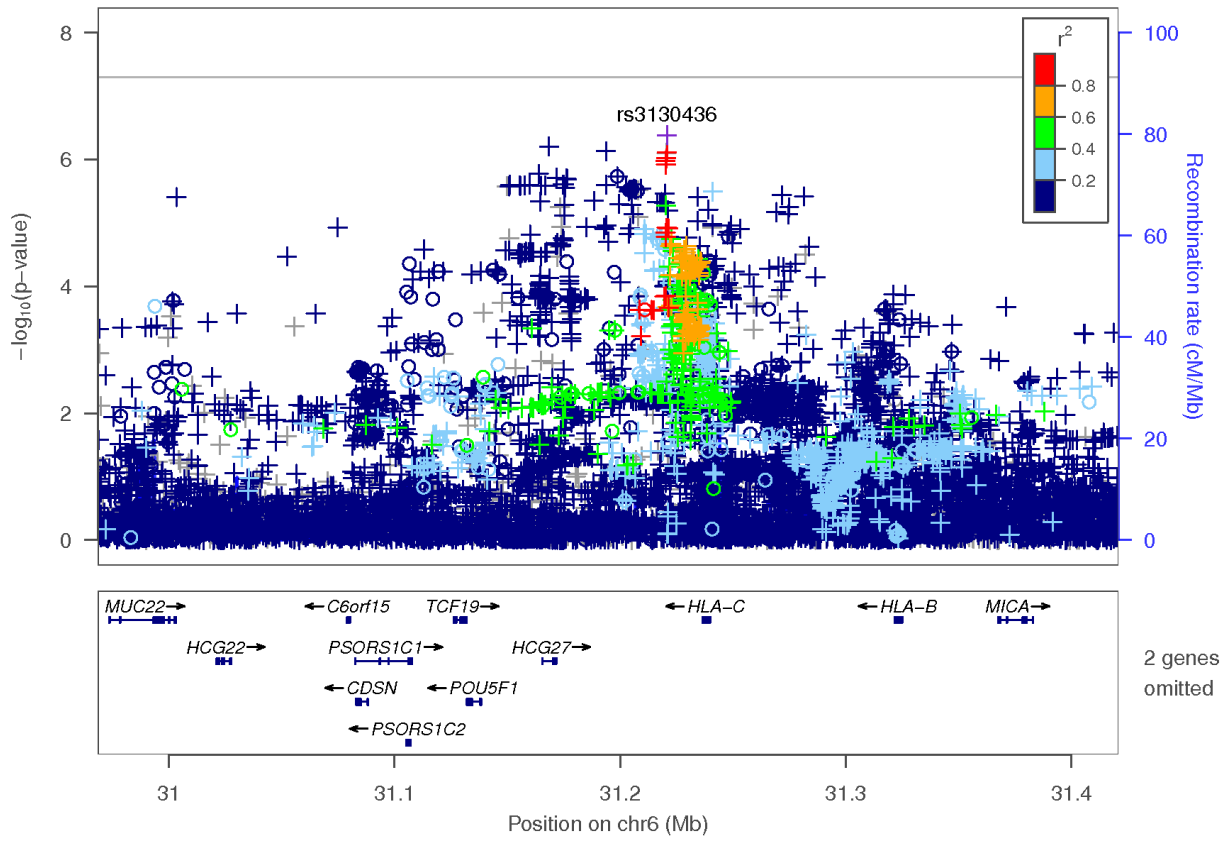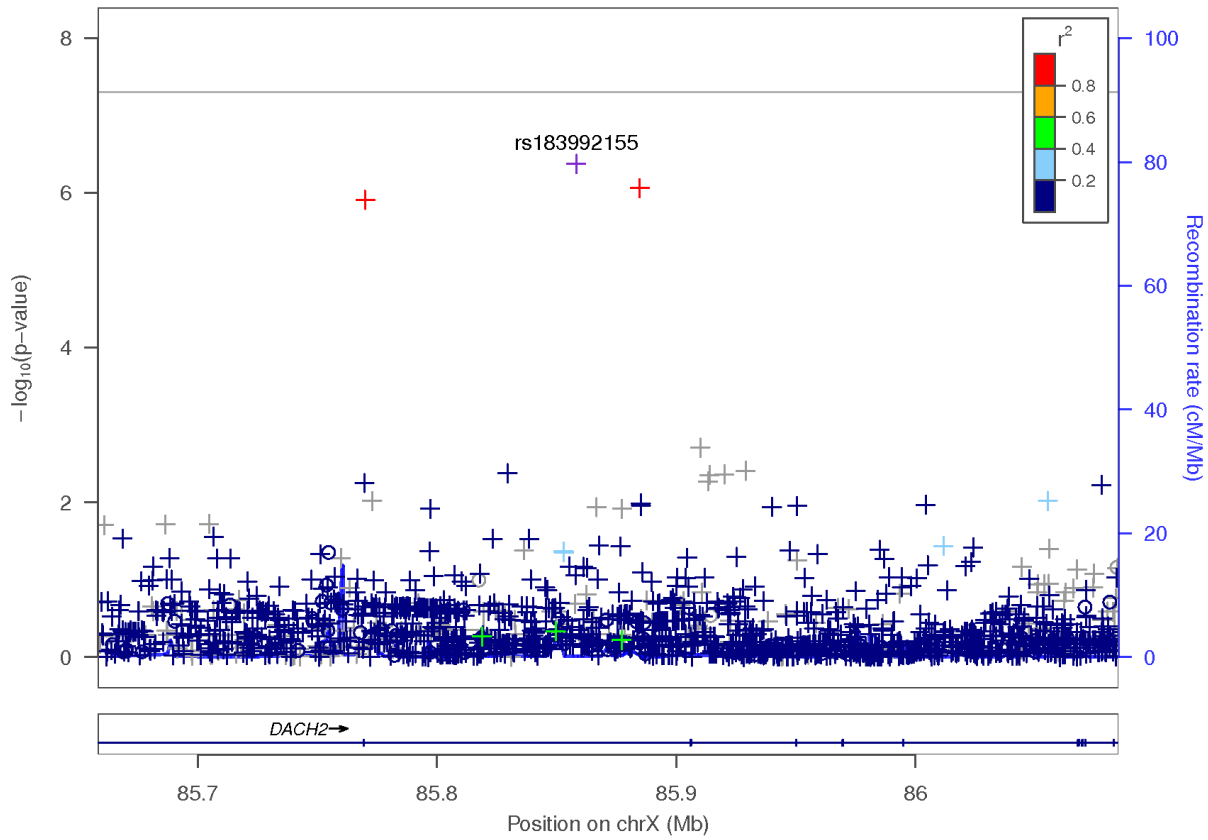

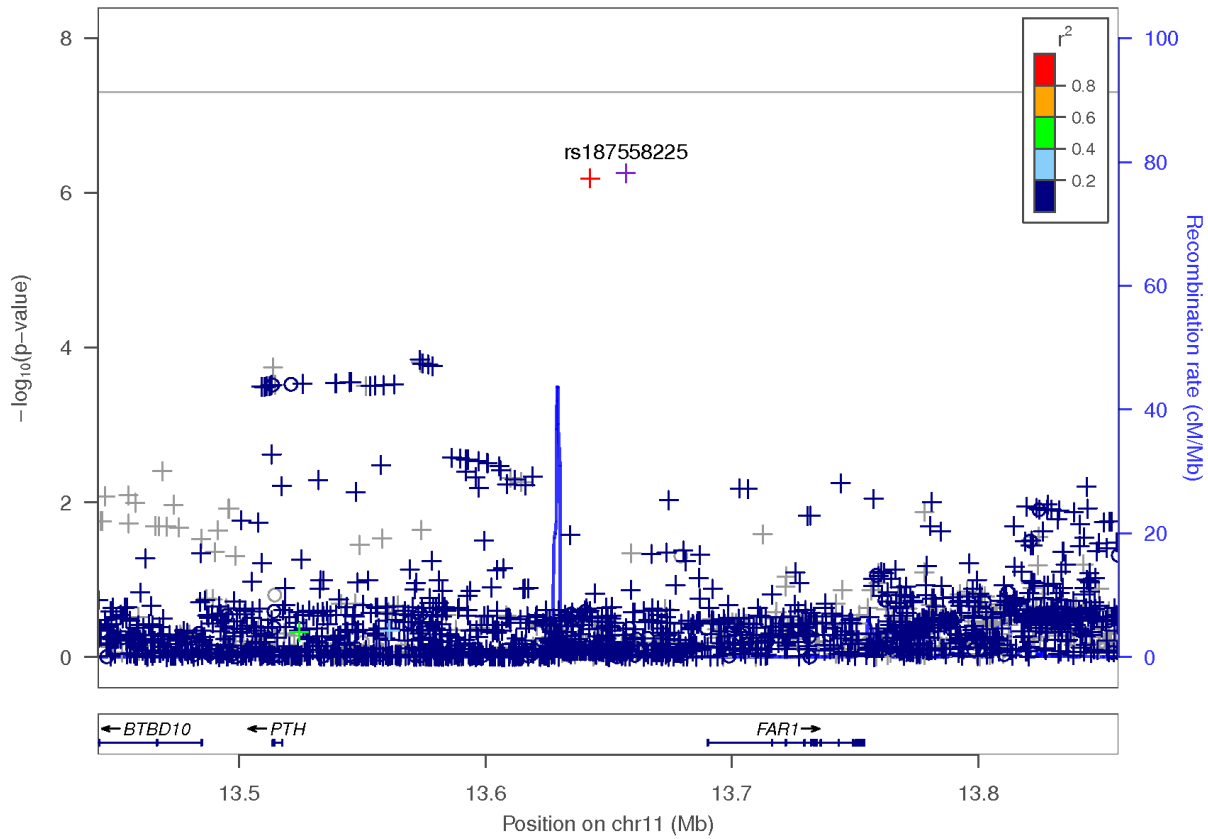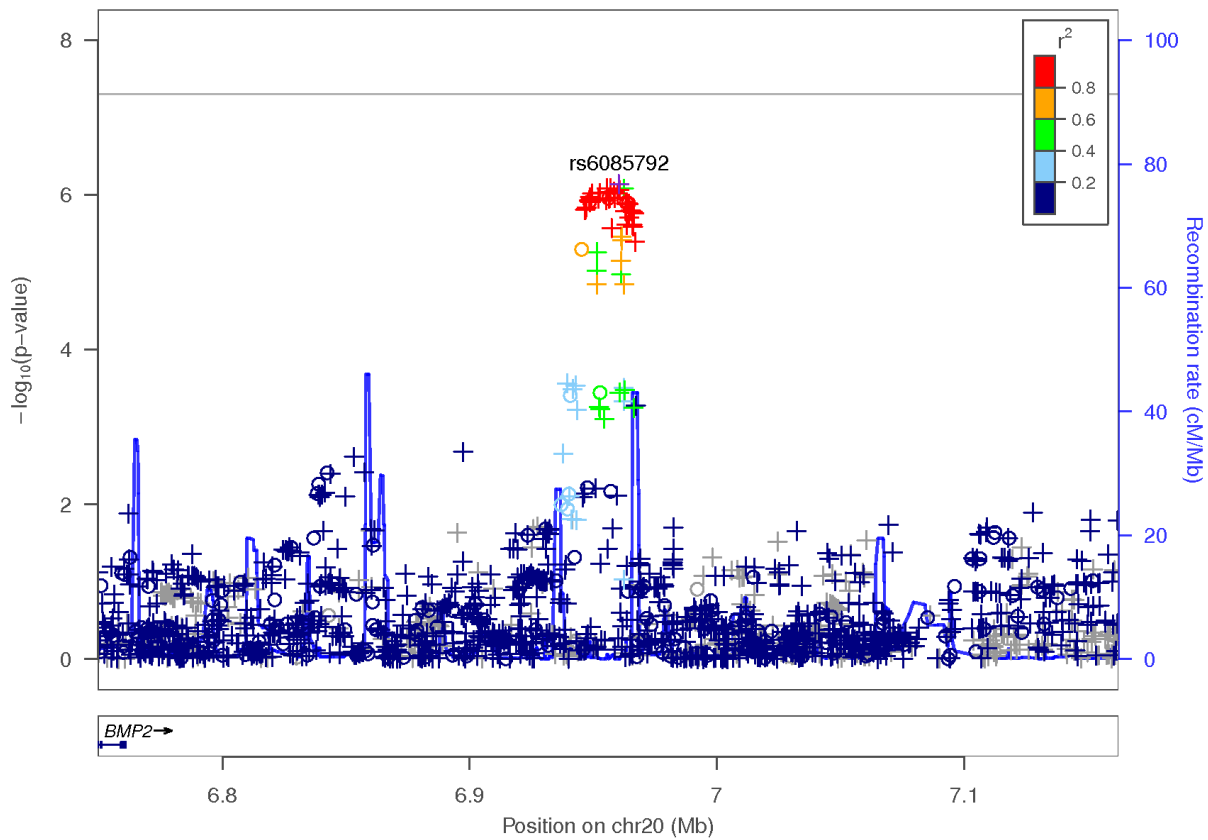

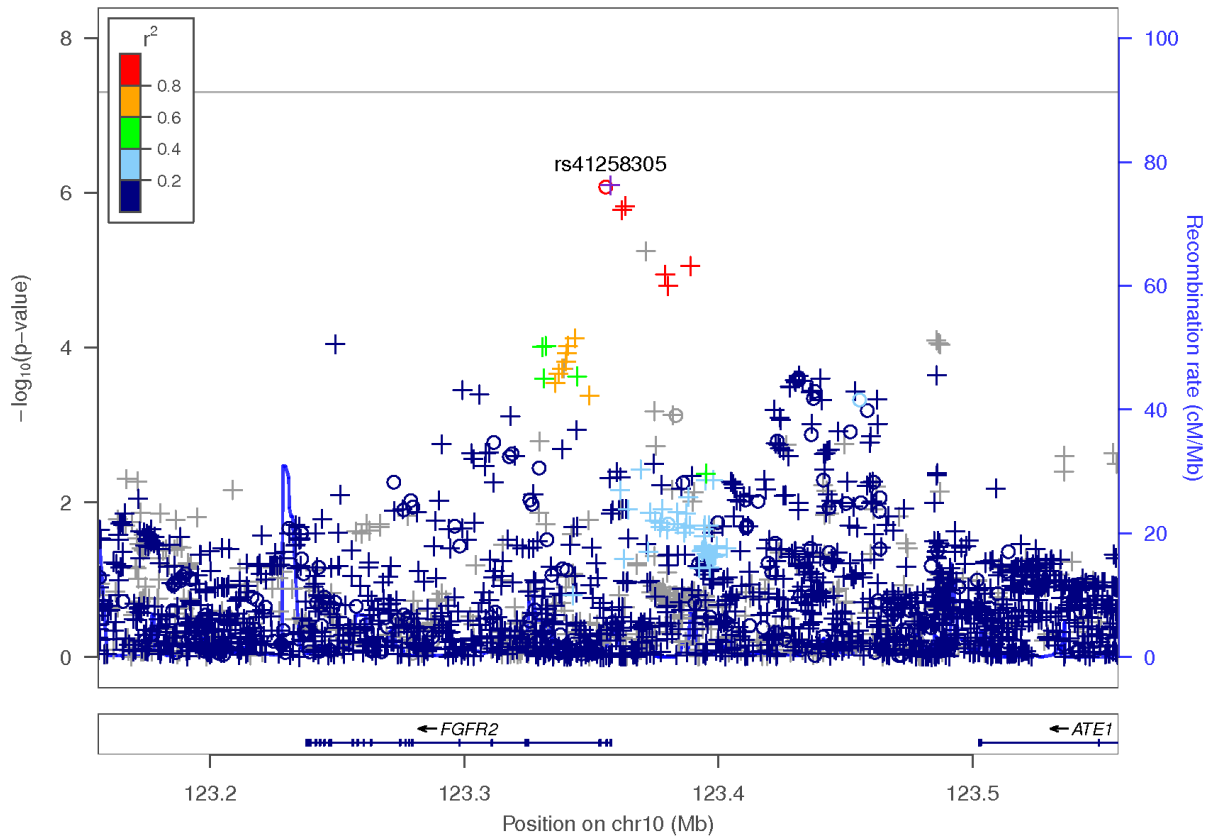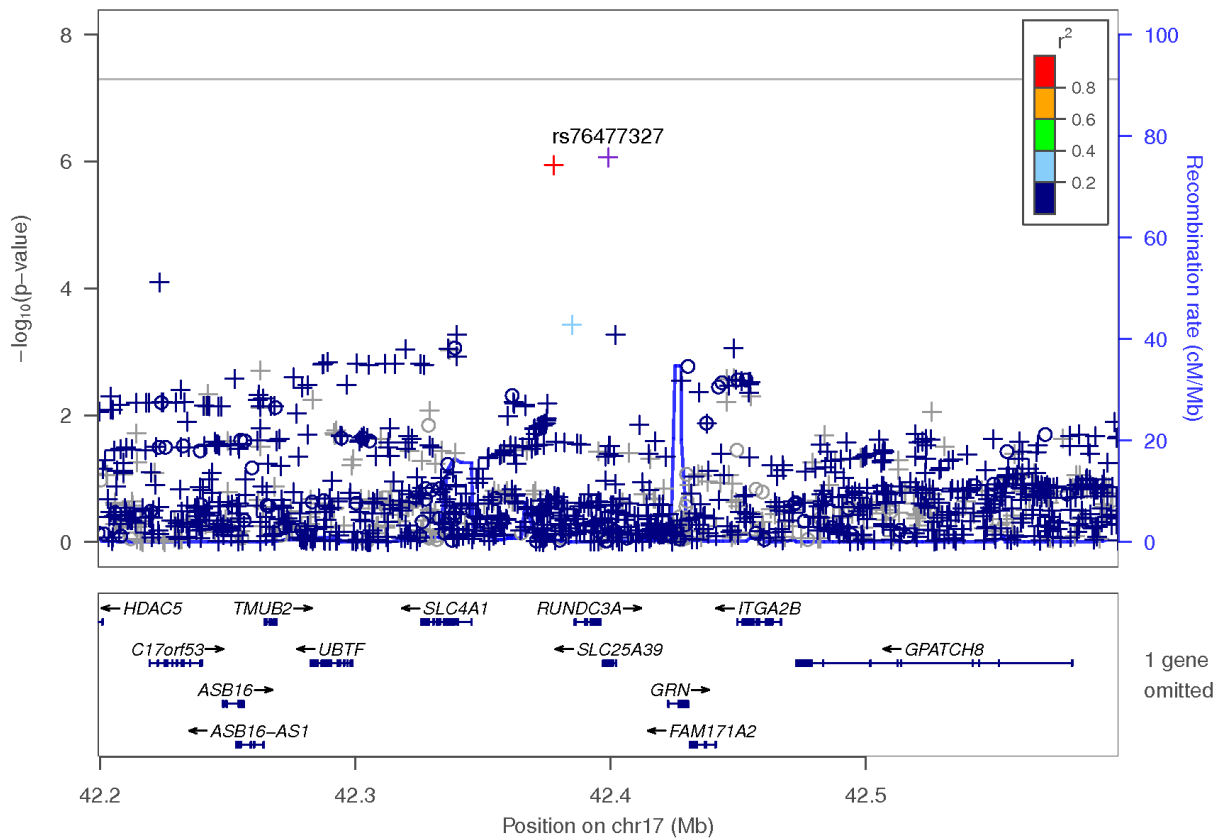

Supplement: NIHMS780506-supplement-8.pdf [file NIHMS780506-supplement-8.pdf]
