# Supplementary material
Source: PubMed Central journal article supplement (PMC5207801)

# Analysis Summary: Hypermobility Beighton Score

## Phenotype Description

The "beighton\_hypermobility\_qtl" phenotype comes from:

- "morphology" survey:
  - "Can you bring your right thumb to reach your forearm (see above image)?(right\_thumb\_flexibility)" (Yes, No, I'm not sure)
  - "Can you bring your left thumb to reach your forearm? (left\_thumb\_flexibility)" (Yes, No, I'm not sure)
  - "Can you extend your right forearm backwards to form a greater than 180 degree angle at your elbow (see above image)? (right\_elbow\_hyper)" (Yes, No, I'm not sure)
  - "Can you extend your left forearm backwards to form a greater than 180 degree angle at your elbow? (left\_elbow\_hyper)" (Yes, No, I'm not sure)
  - "Can you extend your lower left leg forward to form a greater than 180 degree angle at your knee (see above image)? (left\_knee\_hyper)" (Yes, No, I'm not sure)
  - "Can you extend your lower right leg forward to form a greater than 180 degree angle at your knee? (right\_knee\_hyper)" (Yes, No, I'm not sure)
  - "Can you bend down and place your entire palms on the floor while keeping your legs straight (see above image)? (palms\_on\_floor)" (Yes, No, I'm not sure)
  - "When you place your right hand flat on a table, can you lift your right little finger straight up to a vertical position or even further? (right\_finger\_flex)" (Yes, No, I'm not sure)
  - "When you place your left hand flat on a table, can you lift your left little finger straight up to a vertical position or even further? (left\_finger\_flex)" (Yes, No, I'm not sure)

Each question has three choices (yes, no, not sure). The "beighton\_hypermobility\_qtl" is the total counts of the positive answers to the 9 questions regarding joint mobility (beighton score). It was scored 0-9, higher scores signal greater hypermobility. We set NAs when people who didn't answer.

## Phenotype Statistics

The following table shows demographics of unrelated, European individuals included in the GWAS.

| Phenotype                  | Group | Total | M     | F     | (0,30] | (30,45] | (45,60] | (60,Inf] |
|----------------------------|-------|-------|-------|-------|--------|---------|---------|----------|
| beighton_hypermobility_qtl | [0,1] | 35942 | 22345 | 13597 | 3715   | 10312   | 9867    | 12048    |
|                            | (1,2] | 10202 | 5809  | 4393  | 1710   | 3639    | 2606    | 2247     |
|                            | (2,3] | 7029  | 2830  | 4199  | 1153   | 2479    | 1909    | 1488     |
|                            | (3,5] | 7676  | 3235  | 4441  | 1684   | 3129    | 1701    | 1162     |
|                            | (5,9] | 3294  | 973   | 2321  | 782    | 1308    | 728     | 476      |

The following table shows the phenotypic distribution across 23andMe genotyping platforms for individuals included in the GWAS.

| Phenotype                  | Group | Total | v1/v2 | v3    | v4   |
|----------------------------|-------|-------|-------|-------|------|
| beighton_hypermobility_qtl | [0,1] | 35942 | 4493  | 30033 | 1416 |
|                            | (1,2] | 10202 | 1168  | 8607  | 427  |
|                            | (2,3] | 7029  | 816   | 5862  | 351  |
|                            | (3,5] | 7676  | 826   | 6466  | 384  |
|                            | (5,9] | 3294  | 375   | 2734  | 185  |

## Null Model with Covariates

The following table shows results of fitting a model for the trait based on just the covariates. Principal coordinates have been standardized, so these effect sizes are in units of standard deviations.

|      | Estimate  | Std. Error | t value | Pr(> t )             |
|------|-----------|------------|---------|----------------------|
| age  | -0.026858 | 0.000471   | -57.1   | 0.0                  |
| sexF | 0.931974  | 0.014818   | 62.9    | 0.0                  |
| pc.0 | -0.000683 | 0.007378   | -0.1    | 0.93                 |
| pc.1 | 0.010637  | 0.007409   | 1.4     | 0.15                 |
| pc.2 | 0.043504  | 0.007402   | 5.9     | $4.2 \times 10^{-9}$ |
| pc.3 | -0.003695 | 0.007384   | -0.5    | 0.62                 |
| pc.4 | -0.024697 | 0.007380   | -3.3    | 0.00082              |

## Q-Q plot of scaled residuals

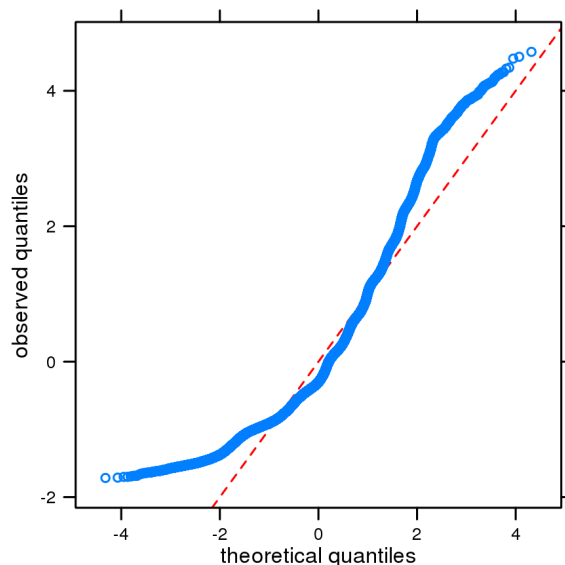

## SNP-level QC information

The following table shows results for QC filters on the genotyped data:

|                         | <b>failed</b> | <b>passed</b> |
|-------------------------|---------------|---------------|
| no filters              | 0             | 1030430       |
| not V1-only, chrM, chrY | 4790          | 1025640       |
| parent-offspring test   | 2129          | 1023511       |
| MAF > 0%                | 3203          | 1020494       |
| HWE > 1e-20             | 48225         | 972832        |
| gt.rate > 90%           | 30775         | 952826        |
| batch effects           | 28267         | 945446        |

The following table shows results for QC filters on the imputed dosage data:

|                    | <b>failed</b> | <b>passed</b> |
|--------------------|---------------|---------------|
| no filters         | 0             | 13733809      |
| MAF > 0%           | 0             | 13733809      |
| imputation quality | 0             | 13733809      |
| batch effects      | 2168          | 13731641      |

The following table shows results for QC filters on the merged association test results:

|                | <b>passed</b> | <b>total</b> |
|----------------|---------------|--------------|
| imputed only   | 12833621      | 12833621     |
| both passed    | 898002        | 13731623     |
| genotyped only | 47444         | 13779067     |
| no test result | -17425        | 13761642     |
| MAF < 0.1%     | -1722150      | 12039492     |

## Genetic Association Tests

We performed linear regression assuming an additive model for allelic effects, using the model:

$$beighton\_hypermobility\_qtl \sim age + sex + pc.0 + pc.1 + pc.2 + pc.3 + pc.4 + genotype$$

This genome-wide association analysis includes data from 64143 individuals of European ancestry, filtered to remove close relatives.

The results in this report have been adjusted for a genomic control inflation factor  $\lambda=1.090$ . The equivalent inflation factor rescaled for a sample size of 2000 would be  $\lambda_{2000}=1.003$ , and for 20000,  $\lambda_{20000}=1.028$ .

## Manhattan Plot

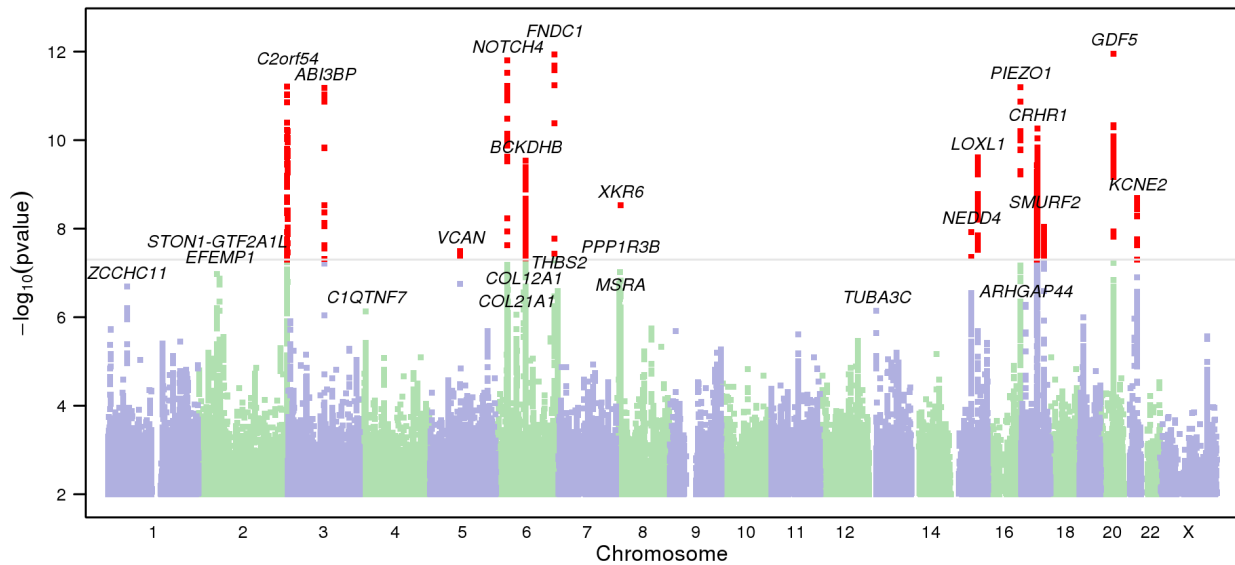

## Q-Q Plot of GWAS Results

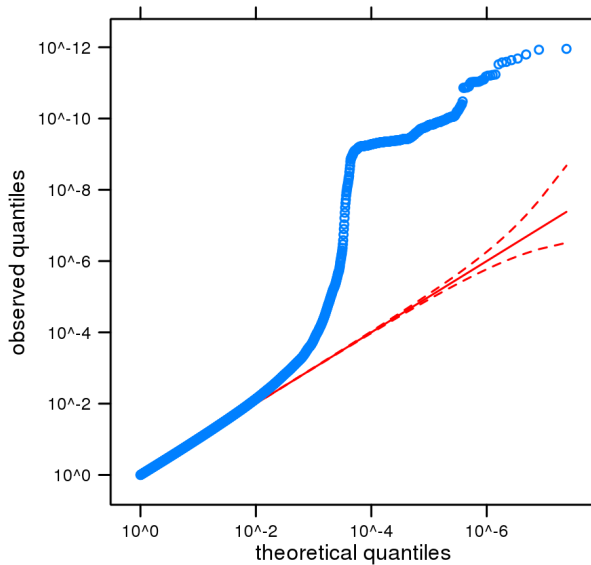

## Index SNPs for Strongest Associations

| cytoband | assay.name  | scaffold | position  | alleles | src | pvalue                | effect | 95% CI          | gene.context                |
|----------|-------------|----------|-----------|---------|-----|-----------------------|--------|-----------------|-----------------------------|
| 20q11.22 | rs143384    | chr20    | 34025756  | A/G     | I   | $1.1 \times 10^{-12}$ | -0.079 | [-0.100,-0.057] | [GDF5]                      |
| 6q25.3   | rs62432291  | chr6     | 159621087 | C/T     | I   | $1.2 \times 10^{-12}$ | -0.177 | [-0.226,-0.128] | [FNDC1]                     |
| 6p21.32  | rs431722    | chr6     | 32187722  | C/T     | I   | $1.6 \times 10^{-12}$ | -0.080 | [-0.102,-0.058] | [NOTCH4]                    |
| 2q37.3   | rs4417704   | chr2     | 241846573 | A/G     | I   | $6.2 \times 10^{-12}$ | 0.087  | [0.062,0.111]   | C2orf54---[ ]--SNED1        |
| 16q24.3  | rs78579285  | chr16    | 88813060  | C/T     | I   | $6.3 \times 10^{-12}$ | -0.104 | [-0.133,-0.074] | [PIEZO1]                    |
| 3q12.2   | rs9828061   | chr3     | 100559959 | C/T     | I   | $6.7 \times 10^{-12}$ | 0.078  | [0.056,0.101]   | [ABI3BP]                    |
| 17q21.31 | rs113518470 | chr17    | 43850932  | C/T     | I   | $5.5 \times 10^{-11}$ | -0.090 | [-0.116,-0.063] | LRRC37A3---[ ]--CRHR1       |
| 15q24.1  | rs150025731 | chr15    | 74223500  | D/I     | I   | $2.5 \times 10^{-10}$ | -0.075 | [-0.098,-0.052] | [LOXL1]                     |
| 6q14.1   | rs4706831   | chr6     | 81007699  | C/T     | I   | $2.9 \times 10^{-10}$ | -0.069 | [-0.090,-0.047] | [BCKDHB]                    |
| 21q22.11 | rs1467847   | chr21    | 35714544  | C/G     | I   | $2.0 \times 10^{-9}$  | 0.066  | [0.044,0.088]   | MRPS6---[ ]--KCNE2          |
| 8p23.1   | rs10109025  | chr8     | 10815571  | C/G     | I   | $3.0 \times 10^{-9}$  | -0.068 | [-0.090,-0.045] | [XKR6]                      |
| 17q24.1  | rs6504249   | chr17    | 62676149  | A/G     | I   | $9.2 \times 10^{-9}$  | -0.072 | [-0.097,-0.048] | SMURF2--[ ]--PLEKHM1P       |
| 15q21.3  | rs13380185  | chr15    | 56116563  | G/T     | I   | $1.2 \times 10^{-8}$  | 0.070  | [0.046,0.094]   | PRTG--[ ]--NEDD4            |
| 5q14.3   | rs34580448  | chr5     | 82810884  | C/T     | I   | $3.2 \times 10^{-8}$  | 0.156  | [0.101,0.211]   | [VCAN]                      |
| 8p23.1   | rs453301    | chr8     | 9030387   | G/T     | I   | $9.6 \times 10^{-8}$  | -0.059 | [-0.080,-0.037] | PPP1R3B--[ ]--TNKS          |
| 2p16.3   | rs77637988  | chr2     | 48775583  | C/G     | I   | $1.0 \times 10^{-7}$  | -0.071 | [-0.096,-0.045] | PPP1R21--[ ]--STON1-GTF2A1L |
| 2p16.1   | rs3791679   | chr2     | 56096892  | A/G     | I   | $1.4 \times 10^{-7}$  | -0.067 | [-0.092,-0.042] | [EFEMP1]                    |
| 1p32.3   | rs11581903  | chr1     | 53030823  | A/G     | I   | $2.1 \times 10^{-7}$  | 0.078  | [0.049,0.108]   | ZCCHC11--[ ]--GPX7          |
| 6q27     | rs1040      | chr6     | 169616347 | C/T     | I   | $2.5 \times 10^{-7}$  | -0.057 | [-0.078,-0.035] | [THBS2]                     |
| 6q14.1   | rs41269313  | chr6     | 75904844  | C/G     | I   | $2.7 \times 10^{-7}$  | -0.108 | [-0.149,-0.067] | [COL12A1]                   |
| 8p23.1   | rs187276360 | chr8     | 9931621   | C/G     | I   | $3.8 \times 10^{-7}$  | 5.025  | [3.087,6.963]   | [MSRA]                      |
| 17p12    | rs8078472   | chr17    | 12873387  | A/G     | I   | $5.3 \times 10^{-7}$  | -0.089 | [-0.123,-0.054] | [ARHGAP44]                  |

|         |            |       |          |     |   |                      |        |                 |                     |
|---------|------------|-------|----------|-----|---|----------------------|--------|-----------------|---------------------|
| 13q11   | rs12584385 | chr13 | 19303482 | A/C | I | $7.1 \times 10^{-7}$ | 0.077  | [0.046,0.107]   | [ ]---TUBA3C        |
| 4p15.32 | rs62289301 | chr4  | 15449024 | G/T | I | $7.3 \times 10^{-7}$ | -0.070 | [-0.097,-0.042] | C1QTNF7-[ ]--CC2D2A |
| 6p12.1  | rs62413470 | chr6  | 55999537 | A/G | I | $8.7 \times 10^{-7}$ | 0.074  | [0.045,0.104]   | [COL21A1]           |

## Quality Statistics for Index SNPs

| assay.name  | is.v2 | is.v3 | is.v4 | gt.rate | hw.p.value | p.date                | freq.b | avg.rsqr | min.rsqr | p.batch               | dose.b | qc.mask |
|-------------|-------|-------|-------|---------|------------|-----------------------|--------|----------|----------|-----------------------|--------|---------|
| rs143384    | FALSE | TRUE  | TRUE  | 0.9995  | 0.011      | 0.018                 | 0.4278 | 0.9938   | 0.9381   | 0.025                 | 0.4291 | v2v3v4  |
| rs62432291  | FALSE | FALSE | FALSE |         |            |                       |        | 0.9144   | 0.8579   | 0.0067                | 0.0535 | v2v3v4  |
| rs431722    | FALSE | FALSE | FALSE |         |            |                       |        | 0.9801   | 0.9750   | 0.0068                | 0.6106 | v2v3v4  |
| rs4417704   | FALSE | FALSE | FALSE |         |            |                       |        | 0.9586   | 0.9461   | 0.035                 | 0.7334 | v2v3v4  |
| rs78579285  | FALSE | FALSE | FALSE |         |            |                       |        | 0.8695   | 0.7477   | 0.039                 | 0.1734 | v2v3v4  |
| rs9828061   | FALSE | FALSE | FALSE |         |            |                       |        | 0.9810   | 0.9717   | 0.18                  | 0.6333 | v2v3v4  |
| rs113518470 | FALSE | FALSE | FALSE |         |            |                       |        | 0.9395   | 0.9343   | 0.40                  | 0.2167 | v2v3v4  |
| rs150025731 | FALSE | FALSE | FALSE |         |            |                       |        | 0.9749   | 0.9729   | 0.96                  | 0.6914 | v2v3v4  |
| rs4706831   | FALSE | FALSE | FALSE |         |            |                       |        | 0.9935   | 0.9920   | 0.47                  | 0.5508 | v2v3v4  |
| rs1467847   | FALSE | FALSE | FALSE |         |            |                       |        | 0.9899   | 0.9855   | 0.14                  | 0.4362 | v2v3v4  |
| rs10109025  | FALSE | FALSE | FALSE |         |            |                       |        | 0.9313   | 0.9001   | 0.41                  | 0.4121 | v2v3v4  |
| rs6504249   | FALSE | TRUE  | FALSE | 0.9995  | 0.077      | 0.84                  | 0.7377 | 0.9663   | 0.7375   | $2.6 \times 10^{-33}$ | 0.7379 | v2v3v4  |
| rs13380185  | FALSE | TRUE  | FALSE | 0.9995  | 0.18       | 0.38                  | 0.7275 | 0.9830   | 0.9220   | 0.00010               | 0.7260 | v2v3v4  |
| rs34580448  | FALSE | FALSE | FALSE |         |            |                       |        | 0.8823   | 0.8642   | 0.019                 | 0.9563 | v2v3v4  |
| rs453301    | FALSE | FALSE | FALSE |         |            |                       |        | 0.9728   | 0.9590   | 0.55                  | 0.5099 | v2v3v4  |
| rs77637988  | FALSE | FALSE | FALSE |         |            |                       |        | 0.9563   | 0.9206   | 0.031                 | 0.7729 | v2v3v4  |
| rs3791679   | TRUE  | TRUE  | TRUE  | 0.9990  | 0.13       | 0.81                  | 0.2376 | 0.9996   | 0.9993   | 0.12                  | 0.2390 | v2v3v4  |
| rs11581903  | FALSE | TRUE  | FALSE | 0.9501  | 0.0014     | $3.1 \times 10^{-12}$ | 0.8486 | 0.9949   | 0.9811   | 0.66                  | 0.8511 | v2v3v4  |
| rs1040      | FALSE | FALSE | FALSE |         |            |                       |        | 0.9955   | 0.9891   | 0.89                  | 0.4279 | v2v3v4  |
| rs41269313  | FALSE | FALSE | FALSE |         |            |                       |        | 0.9156   | 0.8991   | 0.014                 | 0.9211 | v2v3v4  |
| rs187276360 | FALSE | FALSE | FALSE |         |            |                       |        | 0.5008   | 0.4719   | 0.41                  | 0.0024 | v4      |
| rs8078472   | TRUE  | TRUE  | TRUE  | 0.9995  | 0.0060     | 0.39                  | 0.1064 | 0.9997   | 0.9990   | 0.21                  | 0.1063 | v2v3v4  |
| rs12584385  | TRUE  | TRUE  | TRUE  | 0.9991  | 0.74       | 0.55                  | 0.8549 | 0.9976   | 0.9888   | 0.16                  | 0.8543 | v2v3v4  |
| rs62289301  | FALSE | FALSE | FALSE |         |            |                       |        | 0.9323   | 0.9225   | 0.52                  | 0.8041 | v2v3v4  |
| rs62413470  | FALSE | FALSE | FALSE |         |            |                       |        | 0.9801   | 0.9777   | $2.4 \times 10^{-5}$  | 0.8418 | v2v3v4  |

## SNP Statistics in the GWAS Sample

| assay.name  | AA.0  | AB.0  | BB.0  | im.num.0 | dose.b.0 |
|-------------|-------|-------|-------|----------|----------|
| rs143384    | 18503 | 27527 | 10419 | 64143    | 0.4280   |
| rs62432291  |       |       |       | 64143    | 0.0543   |
| rs431722    |       |       |       | 64143    | 0.6048   |
| rs4417704   |       |       |       | 64143    | 0.7362   |
| rs78579285  |       |       |       | 64143    | 0.1756   |
| rs9828061   |       |       |       | 64143    | 0.6349   |
| rs113518470 |       |       |       | 64143    | 0.2168   |
| rs150025731 |       |       |       | 64143    | 0.6882   |
| rs4706831   |       |       |       | 64143    | 0.5524   |
| rs1467847   |       |       |       | 64143    | 0.4330   |
| rs10109025  |       |       |       | 64143    | 0.4105   |
| rs6504249   | 3703  | 20897 | 29368 | 64143    | 0.7361   |
| rs13380185  | 4065  | 21417 | 28207 | 64143    | 0.7233   |
| rs34580448  |       |       |       | 64143    | 0.9564   |
| rs453301    |       |       |       | 64143    | 0.5095   |
| rs77637988  |       |       |       | 64143    | 0.7707   |
| rs3791679   | 37406 | 23037 | 3604  | 64143    | 0.2361   |
| rs11581903  | 1273  | 13577 | 37143 | 64143    | 0.8482   |
| rs1040      |       |       |       | 64143    | 0.4269   |
| rs41269313  |       |       |       | 64143    | 0.9214   |
| rs187276360 |       |       |       | 2763     | 0.0017   |
| rs8078472   | 51169 | 12232 | 704   | 64143    | 0.1064   |
| rs12584385  | 1333  | 15977 | 46803 | 64143    | 0.8545   |
| rs62289301  |       |       |       | 64143    | 0.8025   |
| rs62413470  |       |       |       | 64143    | 0.8435   |

## Annotations from NHGRI GWAS Catalog

The following table shows, for each index SNP, all entries in the NHGRI GWAS Catalog that are within 500kb and in at least moderate linkage disequilibrium ( $r^2 > 0.5$ ).

| region   | position | our.name    | our.pval              | dist    | rsqr  | assay.name | pvalue                | pubmed.id | trait                                     | genes               |
|----------|----------|-------------|-----------------------|---------|-------|------------|-----------------------|-----------|-------------------------------------------|---------------------|
| 20q11.22 | 34025756 | rs143384    | $1.1 \times 10^{-12}$ | -118595 | 0.778 | rs6060369  | $1.0 \times 10^{-16}$ | 18391950  | Height                                    | GDF5,UQCC           |
| 20q11.22 | 34025756 | rs143384    | $1.1 \times 10^{-12}$ | -118595 | 0.778 | rs6060369  | $2.0 \times 10^{-16}$ | 18193045  | Height                                    | BFZB                |
| 20q11.22 | 34025756 | rs143384    | $1.1 \times 10^{-12}$ | -115972 | 0.532 | rs6088792  | $8.0 \times 10^{-7}$  | 18391951  | Height                                    | UQCC, GDF5, ...     |
| 20q11.22 | 34025756 | rs143384    | $1.1 \times 10^{-12}$ | -111548 | 0.789 | rs6060373  | $2.0 \times 10^{-7}$  | 23207799  | Spine bone size                           | UQCC                |
| 20q11.22 | 34025756 | rs143384    | $1.1 \times 10^{-12}$ | -111548 | 0.789 | rs6060373  | $2.0 \times 10^{-17}$ | 18391952  | Height                                    | GDF5                |
| 20q11.22 | 34025756 | rs143384    | $1.1 \times 10^{-12}$ | -50575  | 0.831 | rs6088813  | $1.0 \times 10^{-13}$ | 19343178  | Height                                    | UQCC                |
| 20q11.22 | 34025756 | rs143384    | $1.1 \times 10^{-12}$ | -1794   | 0.836 | rs224333   | $8.0 \times 10^{-37}$ | 23563607  | Height                                    | GDF5                |
| 20q11.22 | 34025756 | rs143384    | $1.1 \times 10^{-12}$ | 0       | 1.000 | rs143384   | $1.0 \times 10^{-58}$ | 20881960  | Height                                    | GDF5                |
| 17q21.31 | 43850932 | rs113518470 | $5.5 \times 10^{-11}$ | -337491 | 0.668 | rs11012    | $6.0 \times 10^{-8}$  | 20070850  | Parkinson's disease                       | PLEKHM1, MAPT, IMP5 |
| 17q21.31 | 43850932 | rs113518470 | $5.5 \times 10^{-11}$ | -334530 | 0.668 | rs17631303 | $1.0 \times 10^{-8}$  | 23544013  | Ovarian cancer in BRCA1 mutation carriers |                     |
| 17q21.31 | 43850932 | rs113518470 | $5.5 \times 10^{-11}$ | -136082 | 0.934 | rs2942168  | $1.0 \times 10^{-28}$ | 21292315  | Parkinson's disease                       | MAPT                |
| 17q21.31 | 43850932 | rs113518470 | $5.5 \times 10^{-11}$ | -131789 | 0.927 | rs393152   | $2.0 \times 10^{-16}$ | 19915575  | Parkinson's disease                       | MAPT, C17orf69, ... |
| 17q21.31 | 43850932 | rs113518470 | $5.5 \times 10^{-11}$ | 72751   | 0.934 | rs12185268 | $3.0 \times 10^{-14}$ | 21738487  | Parkinson's disease                       | MAPT                |
| 17q21.31 | 43850932 | rs113518470 | $5.5 \times 10^{-11}$ | 73287   | 0.926 | rs12373124 | $5.0 \times 10^{-10}$ | 22693459  | Male-pattern baldness                     | Intergenic          |
| 17q21.31 | 43850932 | rs113518470 | $5.5 \times 10^{-11}$ | 126895  | 0.934 | rs1864325  | $5.0 \times 10^{-11}$ | 22504420  | Bone mineral density                      | MAPT                |

|          |          |             |                       |         |       |            |                        |          |                                     |                     |
|----------|----------|-------------|-----------------------|---------|-------|------------|------------------------|----------|-------------------------------------|---------------------|
| 17q21.31 | 43850932 | rs113518470 | 5.5×10 <sup>-11</sup> | 205835  | 0.934 | rs1981997  | 9.0×10 <sup>-14</sup>  | 23583980 | Interstitial lung disease           | MAPT                |
| 17q21.31 | 43850932 | rs113518470 | 5.5×10 <sup>-11</sup> | 230132  | 0.926 | rs8070723  | 2.0×10 <sup>-118</sup> | 21685912 | Progressive supranuclear palsy      | MAPT                |
| 17q21.31 | 43850932 | rs113518470 | 5.5×10 <sup>-11</sup> | 230132  | 0.926 | rs8070723  | 7.0×10 <sup>-12</sup>  | 21044948 | Parkinson's disease                 | MAPT                |
| 17q21.31 | 43850932 | rs113518470 | 5.5×10 <sup>-11</sup> | 336325  | 0.906 | rs9303525  | 8.0×10 <sup>-15</sup>  | 22504418 | Intracranial volume                 | MAPT, GRN, ...      |
| 15q24.1  | 74223500 | rs150025731 | 2.5×10 <sup>-10</sup> | 5565    | 0.897 | rs893817   | 3.0×10 <sup>-6</sup>   | 19584346 | Aortic root size                    | LOXL1               |
| 6q14.1   | 81007699 | rs4706831   | 2.9×10 <sup>-10</sup> | -161710 | 0.696 | rs2322633  | 3.0×10 <sup>-9</sup>   | 23563607 | Height                              | BCKDHB              |
| 21q22.11 | 35714544 | rs1467847   | 2.0×10 <sup>-9</sup>  | -23758  | 0.619 | rs2834442  | 5.0×10 <sup>-12</sup>  | 20881960 | Height                              | KCNE2               |
| 21q22.11 | 35714544 | rs1467847   | 2.0×10 <sup>-9</sup>  | -16154  | 0.900 | rs1013063  | 5.0×10 <sup>-6</sup>   | 23192594 | Body mass index (interaction)       | LOC100130240, KCNE2 |
| 15q21.3  | 56116563 | rs13380185  | 1.2×10 <sup>-8</sup>  | 78314   | 0.645 | rs8032158  | 6.0×10 <sup>-13</sup>  | 20711176 | Keloid                              | NEDD4               |
| 8p23.1   | 9030387  | rs4533301   | 9.6×10 <sup>-8</sup>  | -140289 | 0.527 | rs1045529  | 3.0×10 <sup>-6</sup>   | 23049088 | Myopia (pathological)               | Intergenic          |
| 2p16.3   | 48775583 | rs77637988  | 1.0×10 <sup>-7</sup>  | -129184 | 0.536 | rs10454142 | 1.0×10 <sup>-7</sup>   | 22829776 | Sex hormone-binding globulin levels | LHCGR               |
| 2p16.1   | 56096892 | rs3791679   | 1.4×10 <sup>-7</sup>  | 0       | 1.000 | rs3791679  | 8.0×10 <sup>-16</sup>  | 23563607 | Height                              | EFEMP1              |
| 2p16.1   | 56096892 | rs3791679   | 1.4×10 <sup>-7</sup>  | 0       | 1.000 | rs3791679  | 6.0×10 <sup>-9</sup>   | 20189936 | Height                              | EFEMP1              |
| 2p16.1   | 56096892 | rs3791679   | 1.4×10 <sup>-7</sup>  | 0       | 1.000 | rs3791679  | 6.0×10 <sup>-11</sup>  | 18391951 | Height                              | EFEMP1, PNPT1       |
| 2p16.1   | 56096892 | rs3791679   | 1.4×10 <sup>-7</sup>  | 14417   | 0.993 | rs3791675  | 3.0×10 <sup>-35</sup>  | 20881960 | Height                              | EFEMP1              |
| 2p16.1   | 56096892 | rs3791679   | 1.4×10 <sup>-7</sup>  | 14417   | 0.993 | rs3791675  | 3.0×10 <sup>-7</sup>   | 20397748 | Height                              | EFEMP1              |
| 2p16.1   | 56096892 | rs3791679   | 1.4×10 <sup>-7</sup>  | 14417   | 0.993 | rs3791675  | 4.0×10 <sup>-6</sup>   | 19893584 | Height                              | EFEMP1              |
| 2p16.1   | 56096892 | rs3791679   | 1.4×10 <sup>-7</sup>  | 14417   | 0.993 | rs3791675  | 2.0×10 <sup>-9</sup>   | 19396169 | Height                              | EFEMP1              |
| 2p16.1   | 56096892 | rs3791679   | 1.4×10 <sup>-7</sup>  | 14417   | 0.993 | rs3791675  | 2.0×10 <sup>-12</sup>  | 18391952 | Height                              | EFEMP1              |
| 4p15.32  | 15449024 | rs62289301  | 7.3×10 <sup>-7</sup>  | 96386   | 0.503 | rs9918079  | 6.0×10 <sup>-6</sup>   | 23251661 | Obesity-related traits              | CC2D2A              |

## Replication of GWAS Catalog Results

The following table shows, for each GWAS Catalog result for similar traits, our association test result for our best available proxy (distance < 100kb, r<sup>2</sup> > 0.8).

*no relevant GWAS catalog terms were available*

## Nearby Nonsynonymous SNPs

| region   | position  | our.name    | our.pval              | dist    | rsqr  | assay.name  | gene     | aa.chg |
|----------|-----------|-------------|-----------------------|---------|-------|-------------|----------|--------|
| 20q11.22 | 34025756  | rs143384    | 1.1×10 <sup>-12</sup> | -53842  | 0.831 | rs4911494   | UQCC     | R51Q   |
| 20q11.22 | 34025756  | rs143384    | 1.1×10 <sup>-12</sup> | -3369   | 0.785 | rs224331    | GDF5     | S276A  |
| 6q25.3   | 159621087 | rs62432291  | 1.2×10 <sup>-12</sup> | 0       | 1.000 | rs62432291  | FNDC1    | P122S  |
| 6q25.3   | 159621087 | rs62432291  | 1.2×10 <sup>-12</sup> | 31844   | 0.513 | rs420137    | FNDC1    | E463Q  |
| 6q25.3   | 159621087 | rs62432291  | 1.2×10 <sup>-12</sup> | 33464   | 0.504 | rs370434    | FNDC1    | Q1003E |
| 6q25.3   | 159621087 | rs62432291  | 1.2×10 <sup>-12</sup> | 33997   | 0.504 | rs420054    | FNDC1    | D1180E |
| 6q25.3   | 159621087 | rs62432291  | 1.2×10 <sup>-12</sup> | 34239   | 0.522 | rs3003174   | FNDC1    | L1261P |
| 6q25.3   | 159621087 | rs62432291  | 1.2×10 <sup>-12</sup> | 34296   | 0.522 | rs2501176   | FNDC1    | Q1280R |
| 6q25.3   | 159621087 | rs62432291  | 1.2×10 <sup>-12</sup> | 39792   | 0.522 | rs386360    | FNDC1    | T1504K |
| 6p21.32  | 32187722  | rs431722    | 1.6×10 <sup>-12</sup> | 661     | 0.562 | rs422951    | NOTCH4   | T320A  |
| 16q24.3  | 88813060  | rs78579285  | 6.3×10 <sup>-12</sup> | -32885  | 0.539 | rs4782321   | CTU2     | V332I  |
| 16q24.3  | 88813060  | rs78579285  | 6.3×10 <sup>-12</sup> | -31987  | 0.532 | rs11549835  | CTU2     | R427Q  |
| 16q24.3  | 88813060  | rs78579285  | 6.3×10 <sup>-12</sup> | -12662  | 0.651 | rs144777557 | PIEZO1   | ?749?  |
| 16q24.3  | 88813060  | rs78579285  | 6.3×10 <sup>-12</sup> | -12275  | 0.651 | rs35265318  | PIEZO1   | R720H  |
| 17q21.31 | 43850932  | rs113518470 | 5.5×10 <sup>-11</sup> | -343635 | 0.573 | rs12949256  | ARHGAP27 | A117T  |
| 17q21.31 | 43850932  | rs113518470 | 5.5×10 <sup>-11</sup> | 72010   | 0.934 | rs62621252  | SPPL2C   | S224P  |
| 17q21.31 | 43850932  | rs113518470 | 5.5×10 <sup>-11</sup> | 72334   | 0.934 | rs62054815  | SPPL2C   | A332T  |
| 17q21.31 | 43850932  | rs113518470 | 5.5×10 <sup>-11</sup> | 72722   | 0.934 | rs12185233  | SPPL2C   | R461P  |
| 17q21.31 | 43850932  | rs113518470 | 5.5×10 <sup>-11</sup> | 72751   | 0.934 | rs12185268  | SPPL2C   | I471V  |
| 17q21.31 | 43850932  | rs113518470 | 5.5×10 <sup>-11</sup> | 73141   | 0.934 | rs12373123  | SPPL2C   | S601P  |
| 17q21.31 | 43850932  | rs113518470 | 5.5×10 <sup>-11</sup> | 73198   | 0.934 | rs12373139  | SPPL2C   | G620R  |
| 17q21.31 | 43850932  | rs113518470 | 5.5×10 <sup>-11</sup> | 73268   | 0.926 | rs12373142  | SPPL2C   | P643R  |
| 17q21.31 | 43850932  | rs113518470 | 5.5×10 <sup>-11</sup> | 73287   | 0.926 | rs12373124  | SPPL2C   | H649H  |
| 17q21.31 | 43850932  | rs113518470 | 5.5×10 <sup>-11</sup> | 73299   | 0.926 | rs12373140  | SPPL2C   | Q653Q  |
| 17q21.31 | 43850932  | rs113518470 | 5.5×10 <sup>-11</sup> | 209843  | 0.934 | rs63750417  | MAPT     | P202L  |
| 17q21.31 | 43850932  | rs113518470 | 5.5×10 <sup>-11</sup> | 210091  | 0.934 | rs62063786  | MAPT     | D285N  |
| 17q21.31 | 43850932  | rs113518470 | 5.5×10 <sup>-11</sup> | 210104  | 0.934 | rs62063787  | MAPT     | V289A  |
| 17q21.31 | 43850932  | rs113518470 | 5.5×10 <sup>-11</sup> | 210346  | 0.934 | rs17651549  | MAPT     | R370W  |
| 17q21.31 | 43850932  | rs113518470 | 5.5×10 <sup>-11</sup> | 216468  | 0.934 | rs10445337  | MAPT     | S447P  |
| 17q21.31 | 43850932  | rs113518470 | 5.5×10 <sup>-11</sup> | 253479  | 0.910 | rs199706121 | MAPT     | ?1735? |
| 17q21.31 | 43850932  | rs113518470 | 5.5×10 <sup>-11</sup> | 257554  | 0.717 | rs200384907 | KANSL1   | ?1225? |
| 17q21.31 | 43850932  | rs113518470 | 5.5×10 <sup>-11</sup> | 257974  | 0.934 | rs34579536  | KANSL1   | I1085T |
| 17q21.31 | 43850932  | rs113518470 | 5.5×10 <sup>-11</sup> | 259600  | 0.934 | rs36076725  | KANSL1   | F917F  |
| 17q21.31 | 43850932  | rs113518470 | 5.5×10 <sup>-11</sup> | 259609  | 0.934 | rs35833914  | KANSL1   | D914D  |
| 17q21.31 | 43850932  | rs113518470 | 5.5×10 <sup>-11</sup> | 266187  | 0.934 | rs34043286  | KANSL1   | S718P  |
| 17q21.31 | 43850932  | rs113518470 | 5.5×10 <sup>-11</sup> | 397905  | 0.765 | rs35643216  | KANSL1   | N225D  |
| 17q21.31 | 43850932  | rs113518470 | 5.5×10 <sup>-11</sup> | 398267  | 0.765 | rs17585974  | KANSL1   | K104T  |
| 15q24.1  | 74223500  | rs150025731 | 2.5×10 <sup>-10</sup> | -3954   | 0.952 | rs1048661   | LOXL1    | R141L  |
| 5q14.3   | 82810884  | rs34580448  | 3.2×10 <sup>-8</sup>  | 4286    | 1.000 | rs61749613  | VCAN     | K349E  |

## Nearby Expression QTLs

| region | position | our.name | our.pval | dist | rsqr | assay.name | eqtl.dist | eqtl.gene | eqtl.pval | eqtl.rsqr | tissue | pubmed.id |
|--------|----------|----------|----------|------|------|------------|-----------|-----------|-----------|-----------|--------|-----------|
|--------|----------|----------|----------|------|------|------------|-----------|-----------|-----------|-----------|--------|-----------|

|          |           |             |                       |         |       |             |          |           |                        |       |                |          |
|----------|-----------|-------------|-----------------------|---------|-------|-------------|----------|-----------|------------------------|-------|----------------|----------|
| 20q11.22 | 34025756  | rs143384    | 1.1×10 <sup>-12</sup> | -137773 | 0.524 | rs13038012  | 326158   | CPNE1     | 0.00012                | 0.052 | B-Cell         | 22446964 |
| 20q11.22 | 34025756  | rs143384    | 1.1×10 <sup>-12</sup> | -115972 | 0.532 | rs6088792   | 304357   | CPNE1     | 6.0×10 <sup>-6</sup>   | 0.071 | Monocyte       | 22446964 |
| 20q11.22 | 34025756  | rs143384    | 1.1×10 <sup>-12</sup> | -73136  | 0.832 | rs4911178   | -61666   | UQCC      | 6.0×10 <sup>-8</sup>   | 0.100 | Monocyte       | 22446964 |
| 20q11.22 | 34025756  | rs143384    | 1.1×10 <sup>-12</sup> | -67503  | 0.832 | rs1570004   | 0        | UQCC      | 2.5×10 <sup>-47</sup>  | 0.134 | Monocyte       | 20502693 |
| 6p21.32  | 32187722  | rs431722    | 1.6×10 <sup>-12</sup> | -3017   | 0.541 | rs3134798   | -580164  | BAT2      | 0.00019                | 0.048 | Monocyte       | 22446964 |
| 2q37.3   | 241846573 | rs4417704   | 6.2×10 <sup>-12</sup> | -336989 | 0.568 | rs10207380  | 394926   | SEPT2     | 9.8×10 <sup>-5</sup>   |       | Lymphoblastoid | 20220756 |
| 16q24.3  | 88813060  | rs78579285  | 6.3×10 <sup>-12</sup> | -31210  | 0.532 | rs1061238   | 0        | FAM38A    | 2.8×10 <sup>-21</sup>  | 0.062 | Monocyte       | 20502693 |
| 17q21.31 | 43850932  | rs113518470 | 5.5×10 <sup>-11</sup> | -337491 | 0.668 | rs11012     | 201708   | MGC57346  | 6.7×10 <sup>-23</sup>  | 0.297 | B-Cell         | 22446964 |
| 17q21.31 | 43850932  | rs113518470 | 5.5×10 <sup>-11</sup> | -301406 | 0.682 | rs17631676  | 42490    | LRRC37A4  | 6.0×10 <sup>-208</sup> | 0.475 | Monocyte       | 20502693 |
| 17q21.31 | 43850932  | rs113518470 | 5.5×10 <sup>-11</sup> | -301406 | 0.682 | rs17631676  | 165623   | MGC57346  | 1.8×10 <sup>-59</sup>  | 0.613 | Monocyte       | 22446964 |
| 17q21.31 | 43850932  | rs113518470 | 5.5×10 <sup>-11</sup> | -301406 | 0.682 | rs17631676  | 378322   | HS.554608 | 0.00057                | 0.042 | B-Cell         | 22446964 |
| 17q21.31 | 43850932  | rs113518470 | 5.5×10 <sup>-11</sup> | -301406 | 0.682 | rs17631676  | 170002   | C17ORF69  | 7.7×10 <sup>-5</sup>   | 0.055 | B-Cell         | 22446964 |
| 17q21.31 | 43850932  | rs113518470 | 5.5×10 <sup>-11</sup> | -131789 | 0.927 | rs393152    | 580720   | NMT1      | 0.00045                | 0.156 | Lymphoblastoid | 19644074 |
| 17q21.31 | 43850932  | rs113518470 | 5.5×10 <sup>-11</sup> | 5407    | 0.550 | rs117631329 | 446394   | KANSL1    | 5.3×10 <sup>-8</sup>   | 0.077 | Lymphoblastoid | 24037378 |
| 17q21.31 | 43850932  | rs113518470 | 5.5×10 <sup>-11</sup> | 462337  | 0.587 | rs140833087 | 354766   | NSF       | 3.5×10 <sup>-8</sup>   | 0.079 | Lymphoblastoid | 24037378 |
| 17q21.31 | 43850932  | rs113518470 | 5.5×10 <sup>-11</sup> | 483356  | 0.875 | rs142039218 | 666195   | GOSR2     | 7.4×10 <sup>-13</sup>  | 0.130 | Lymphoblastoid | 24037378 |
| 17q21.31 | 43850932  | rs113518470 | 5.5×10 <sup>-11</sup> | 495738  | 0.730 | rs139480590 | 647403   | CRHR1     | 2.4×10 <sup>-11</sup>  | 0.113 | Lymphoblastoid | 24037378 |
| 6q14.1   | 81007699  | rs4706831   | 2.9×10 <sup>-10</sup> | -115272 | 0.531 | rs2490245   | 697719   | LCA5      | 0.00043                | 0.158 | Fibroblast     | 19644074 |
| 21q22.11 | 35714544  | rs1467847   | 2.0×10 <sup>-9</sup>  | -24045  | 0.651 | rs2834440   | -1558214 | C21ORF66  | 0.0012                 | 0.037 | B-Cell         | 22446964 |
| 8p23.1   | 10815571  | rs10109025  | 3.0×10 <sup>-9</sup>  | 3086    | 0.567 | rs11250099  | 841532   | FDFT1     | 3.0×10 <sup>-9</sup>   | 0.026 | Monocyte       | 20502693 |
| 8p23.1   | 10815571  | rs10109025  | 3.0×10 <sup>-9</sup>  | 3086    | 0.567 | rs11250099  | 532863   | BLK       | 1.6×10 <sup>-6</sup>   | 0.018 | Monocyte       | 20502693 |
| 8p23.1   | 10815571  | rs10109025  | 3.0×10 <sup>-9</sup>  | 4283    | 0.576 | rs4841465   | 459280   | C8ORF13   | 6.1×10 <sup>-9</sup>   | 0.114 | Monocyte       | 22446964 |
| 8p23.1   | 10815571  | rs10109025  | 3.0×10 <sup>-9</sup>  | 4283    | 0.576 | rs4841465   | -2072223 | MFHAS1    | 2.1×10 <sup>-6</sup>   | 0.077 | B-Cell         | 22446964 |
| 8p23.1   | 10815571  | rs10109025  | 3.0×10 <sup>-9</sup>  | 16297   | 0.524 | rs10096421  | 447113   | C8orf13   | 0.00033                | 0.163 | Lymphoblastoid | 19644074 |
| 8p23.1   | 9030387   | rs453301    | 9.6×10 <sup>-8</sup>  | -200551 | 0.504 | rs6983150   | 203154   | PPP1R3B   | 2.6×10 <sup>-15</sup>  | 0.260 | Lymphoblastoid | 17873874 |
| 8p23.1   | 9030387   | rs453301    | 9.6×10 <sup>-8</sup>  | -119079 | 0.504 | rs3989373   | -349821  | CLDN23    | 3.8×10 <sup>-6</sup>   | 0.074 | Monocyte       | 22446964 |
| 8p23.1   | 9030387   | rs453301    | 9.6×10 <sup>-8</sup>  | -974    | 0.953 | rs435581    | -2285766 | DEFA4     | 0.00052                | 0.042 | B-Cell         | 22446964 |
| 8p23.1   | 9030387   | rs453301    | 9.6×10 <sup>-8</sup>  | -974    | 0.953 | rs435581    | -281782  | MFHAS1    | 4.6×10 <sup>-7</sup>   | 0.087 | B-Cell         | 22446964 |
| 8p23.1   | 9030387   | rs453301    | 9.6×10 <sup>-8</sup>  | 54908   | 0.664 | rs2929451   | 334164   | MFHAS1    | 2.2×10 <sup>-10</sup>  | 0.029 | Monocyte       | 20502693 |
| 1p32.3   | 53030823  | rs11581903  | 2.1×10 <sup>-7</sup>  | -415965 | 0.613 | rs1983833   | -968463  | EPS15     | 0.00041                |       | Lymphoblastoid | 20220756 |
| 1p32.3   | 53030823  | rs11581903  | 2.1×10 <sup>-7</sup>  | -275952 | 0.691 | rs1288706   | -256807  | KTI12     | 0.0013                 | 0.036 | B-Cell         | 22446964 |
| 1p32.3   | 53030823  | rs11581903  | 2.1×10 <sup>-7</sup>  | -234573 | 0.624 | rs2762821   | 278078   | GPX7      | 3.0×10 <sup>-10</sup>  | 0.133 | Monocyte       | 22446964 |
| 17p12    | 12873387  | rs8078472   | 5.3×10 <sup>-7</sup>  | -4808   | 0.578 | rs11655654  | 27443    | ELAC2     | 0.00010                | 0.053 | B-Cell         | 22446964 |

## Nearby Clinical Variants

| source  | region  | our.name    | our.pval              | dist    | rsqr  | assay.name | gene   | phenotype                         | accession                   |
|---------|---------|-------------|-----------------------|---------|-------|------------|--------|-----------------------------------|-----------------------------|
| clinvar | 15q24.1 | rs150025731 | 2.5×10 <sup>-10</sup> | -3954   | 0.952 | rs1048661  | LOXL1  | Pseudoexfoliation glaucoma        | SNOMED CT111514006          |
| clinvar | 6q14.1  | rs4706831   | 2.9×10 <sup>-10</sup> | -170460 | 0.860 | rs9448893  | BCKDHB | Maple syrup urine disease         | Office of Rare Diseases3228 |
| clinvar | 6q14.1  | rs4706831   | 2.9×10 <sup>-10</sup> | -170460 | 0.860 | rs9448893  | BCKDHB | Maple syrup urine disease         | SNOMED CT27718001           |
| clinvar | 6q14.1  | rs4706831   | 2.9×10 <sup>-10</sup> | -170460 | 0.860 | rs9448893  | BCKDHB | Maple syrup urine disease type 1B | Office of Rare Diseases8597 |
| clinvar | 6q14.1  | rs4706831   | 2.9×10 <sup>-10</sup> | -94953  | 0.527 | rs3828753  | BCKDHB | Maple syrup urine disease         | Office of Rare Diseases3228 |
| clinvar | 6q14.1  | rs4706831   | 2.9×10 <sup>-10</sup> | -94953  | 0.527 | rs3828753  | BCKDHB | Maple syrup urine disease         | SNOMED CT27718001           |
| clinvar | 6q14.1  | rs4706831   | 2.9×10 <sup>-10</sup> | -94953  | 0.527 | rs3828753  | BCKDHB | Maple syrup urine disease type 1B | Office of Rare Diseases8597 |

## Regional Association Plots

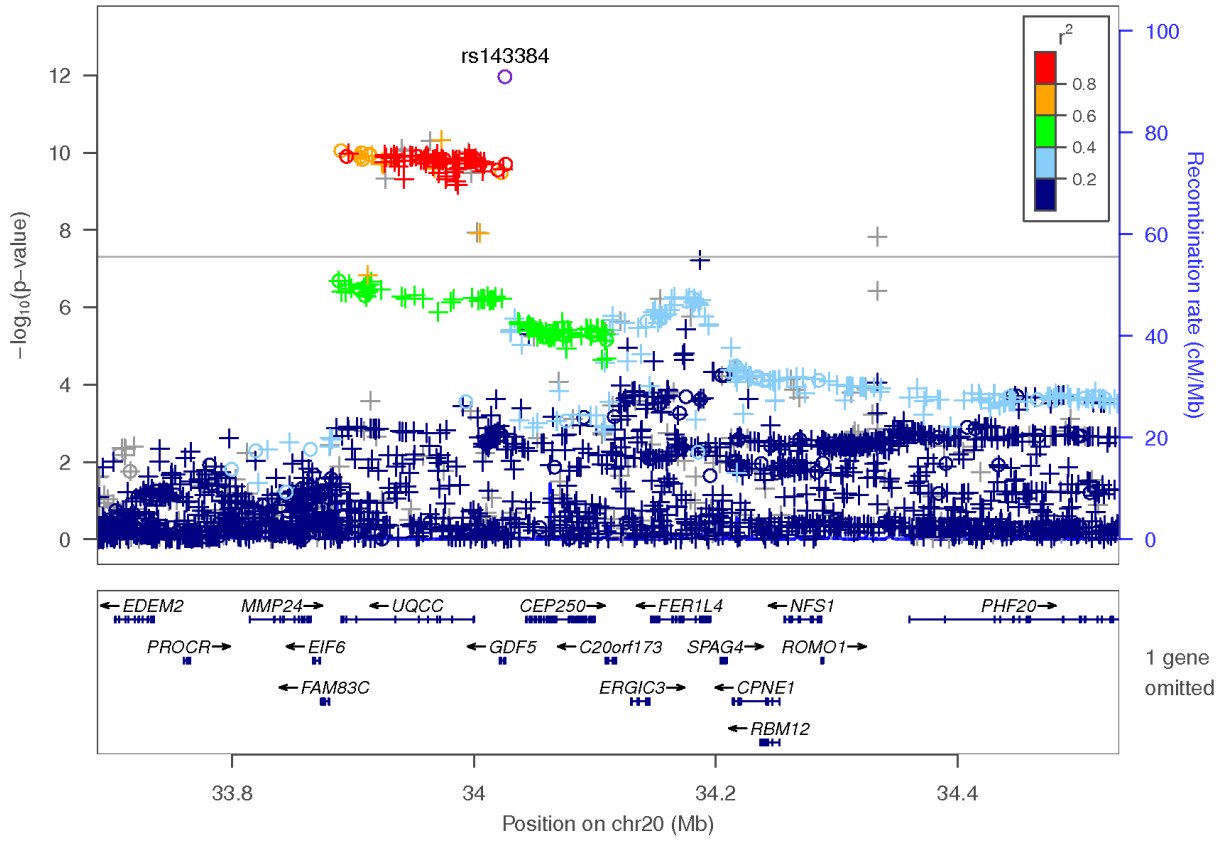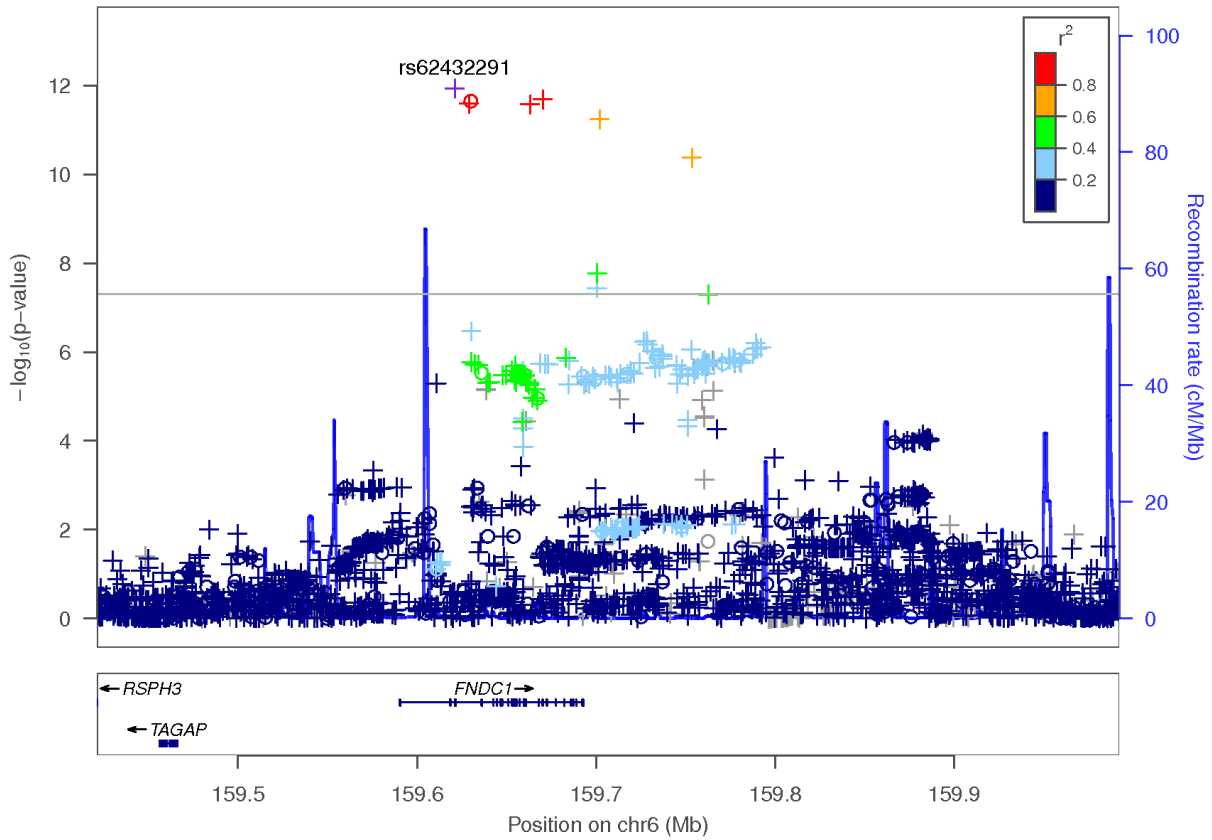

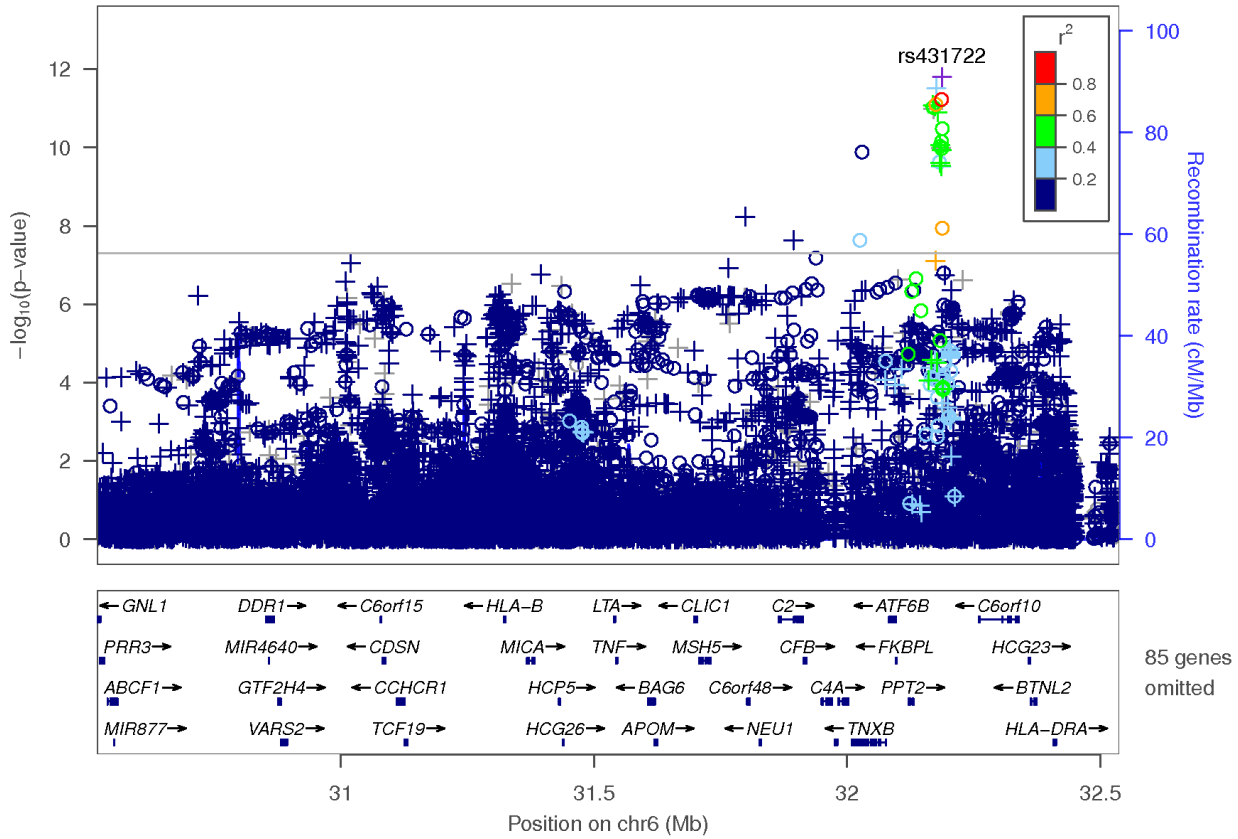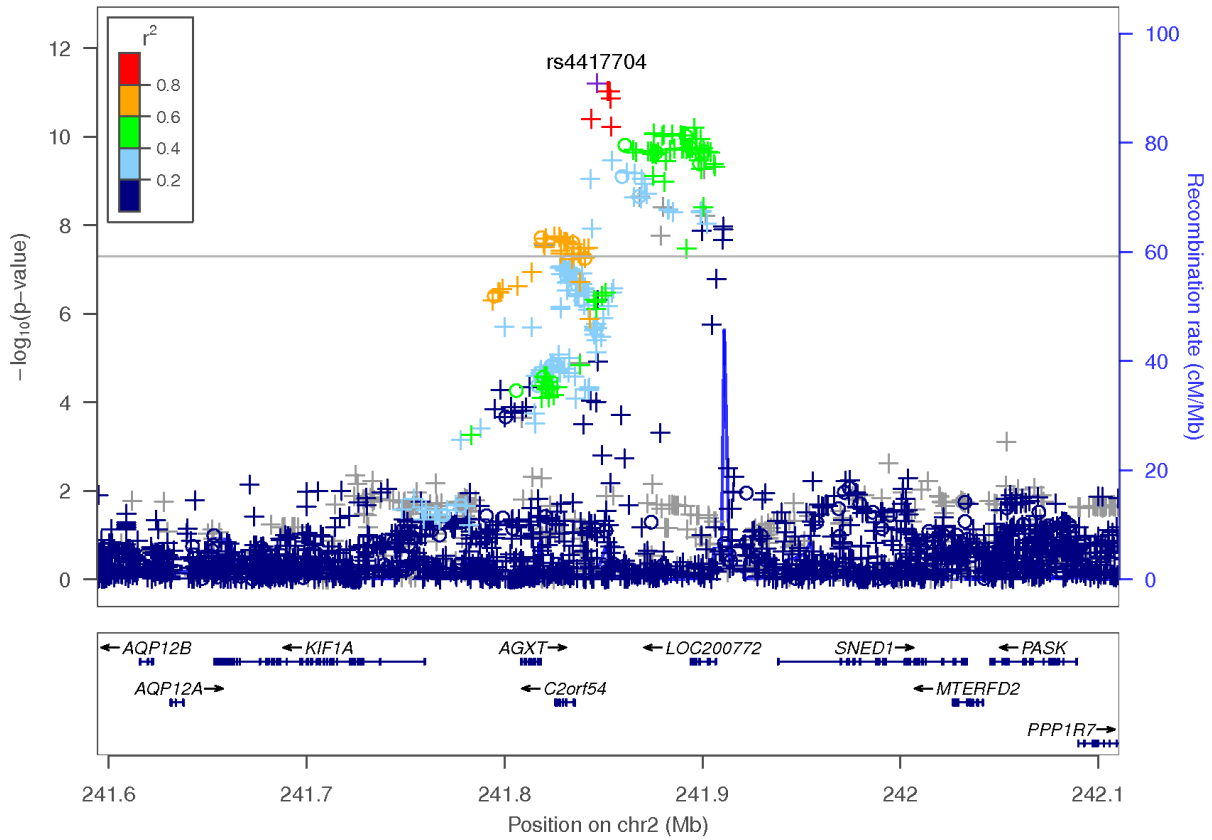



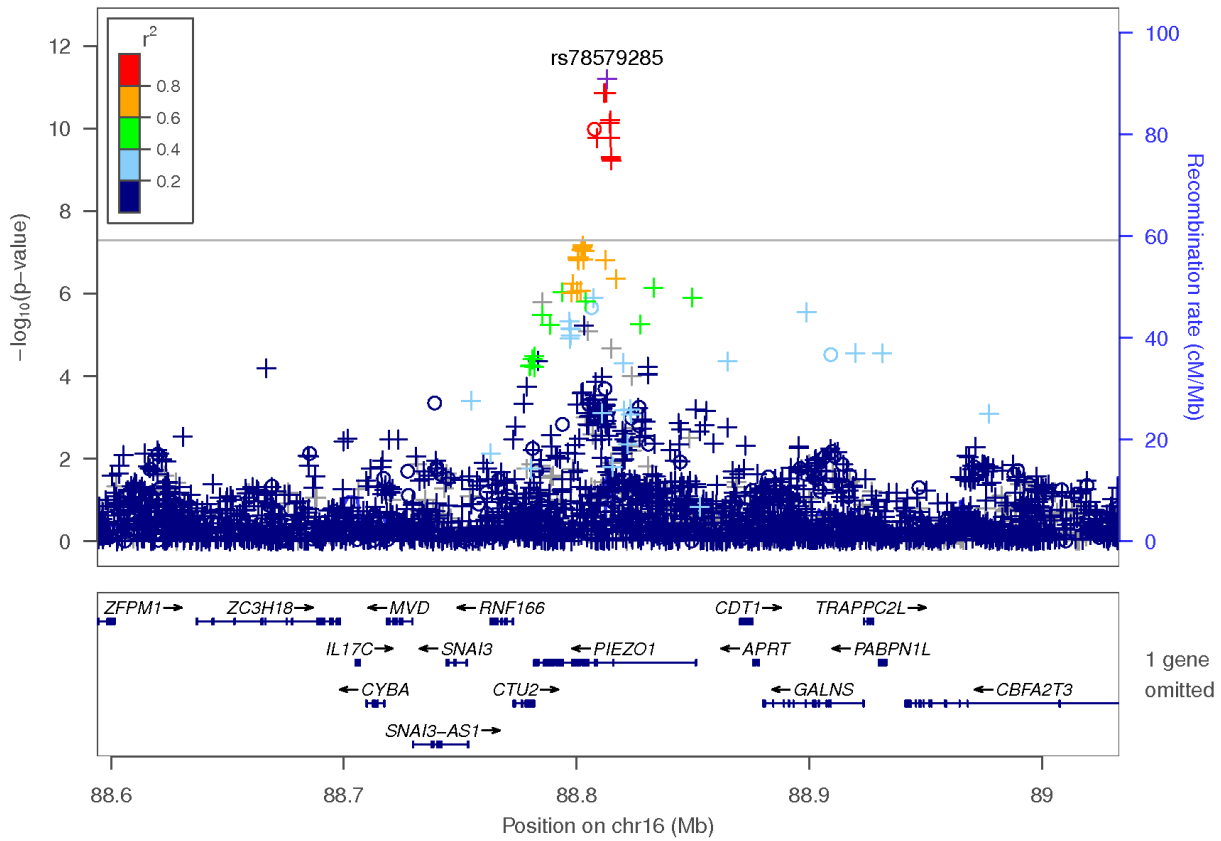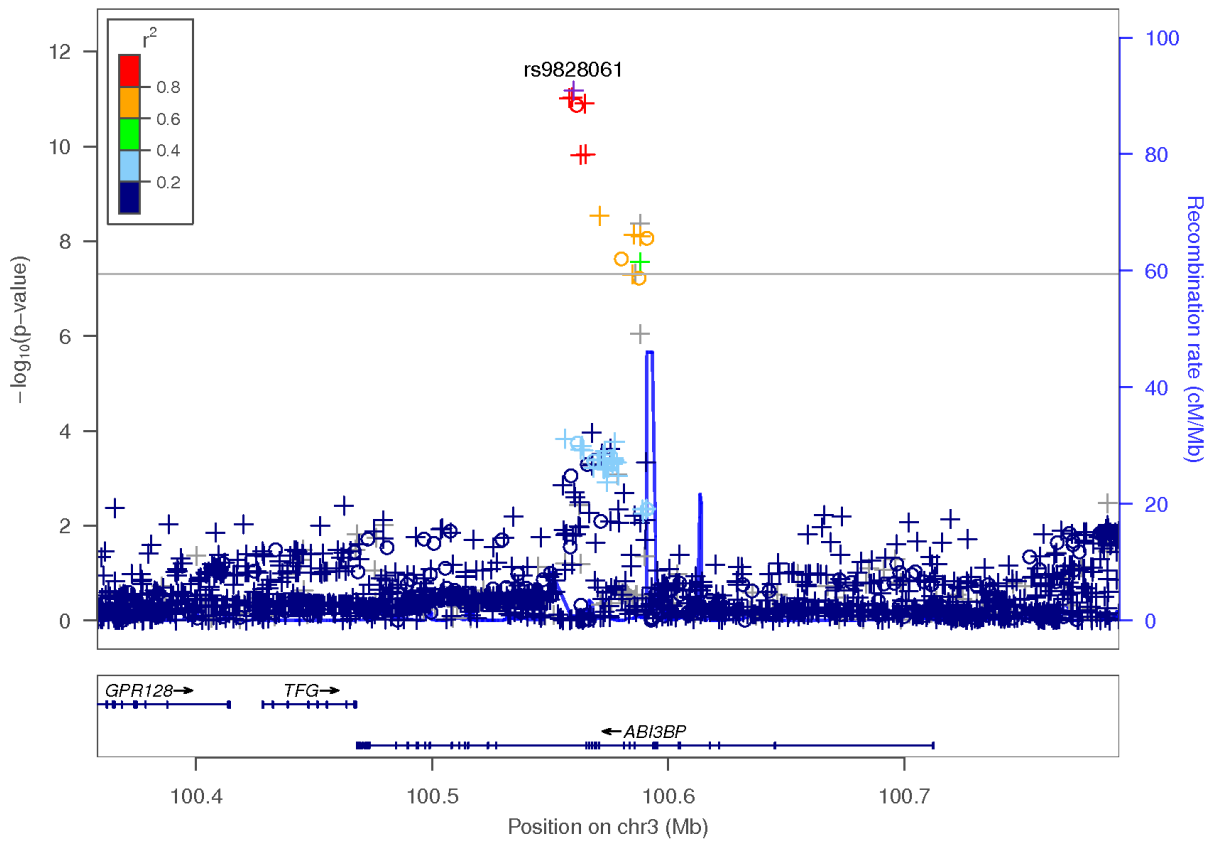

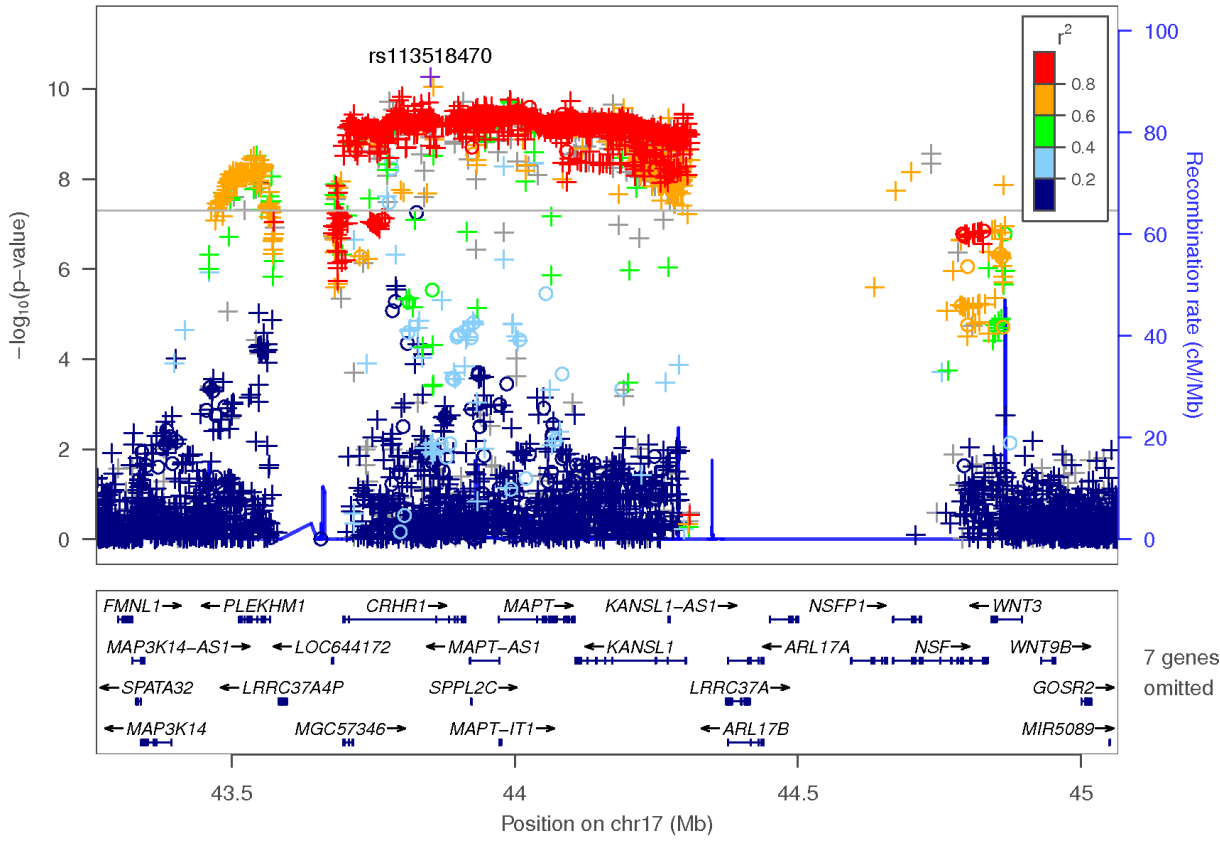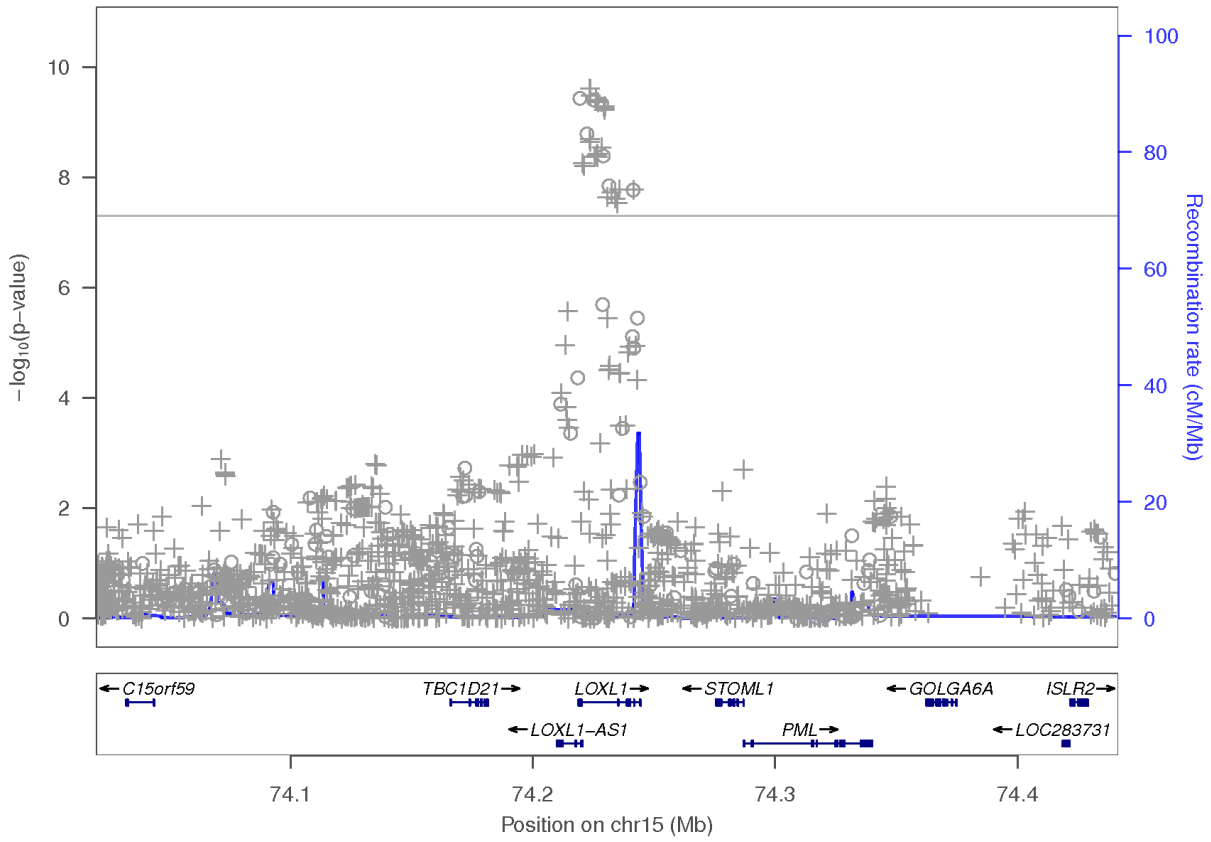

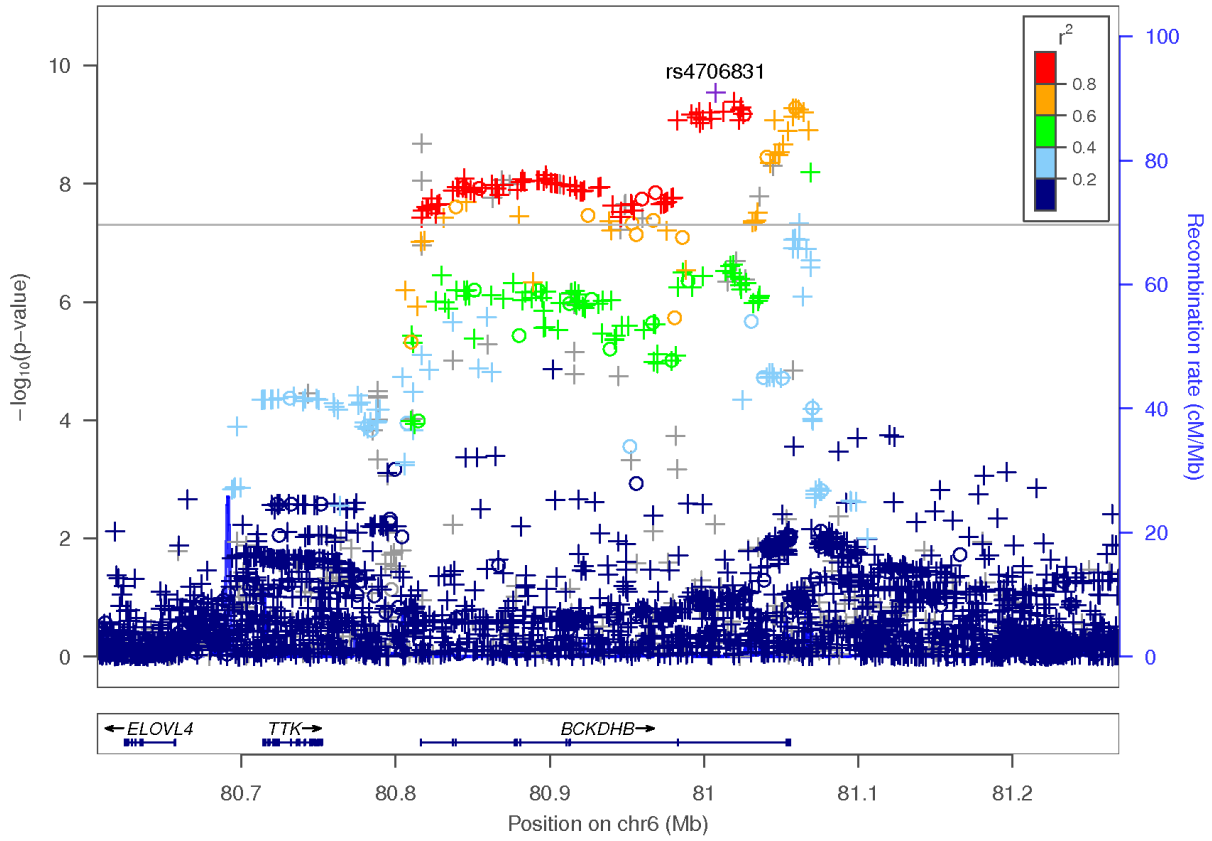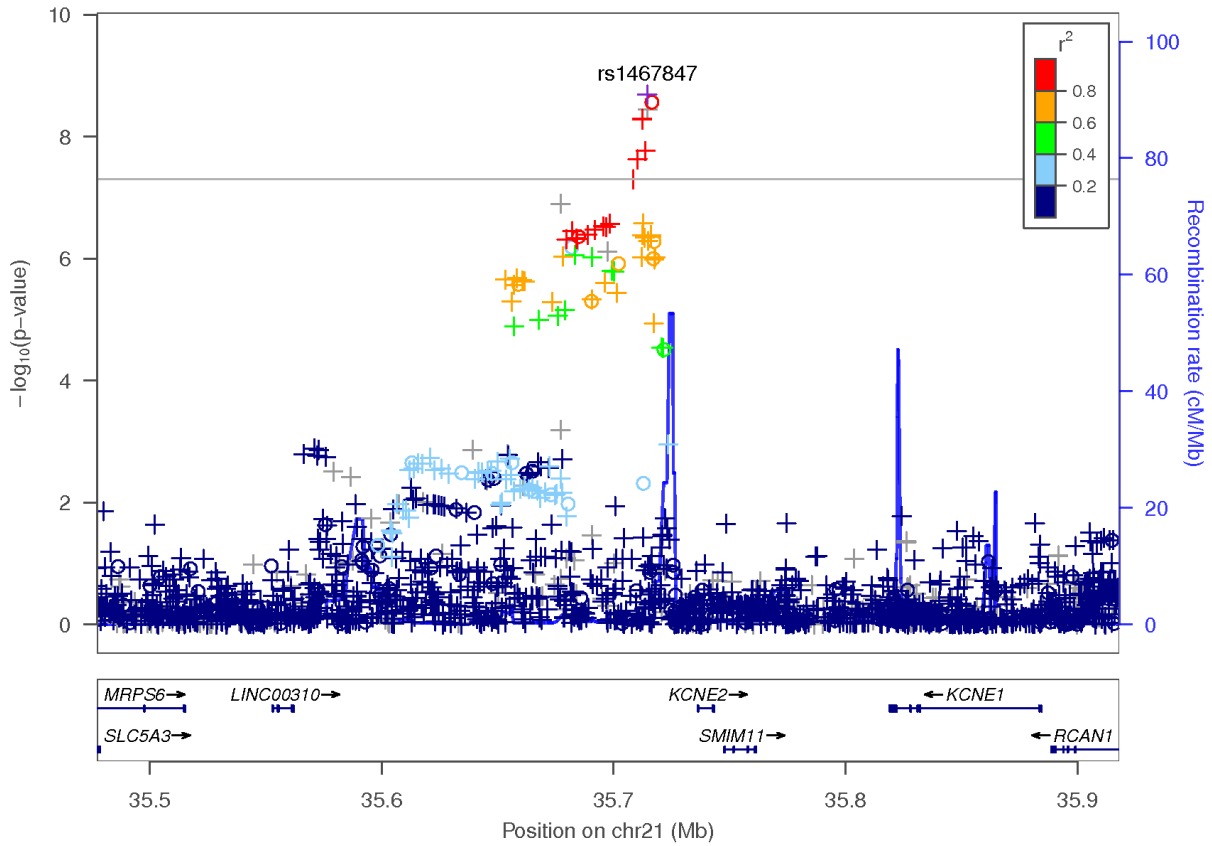

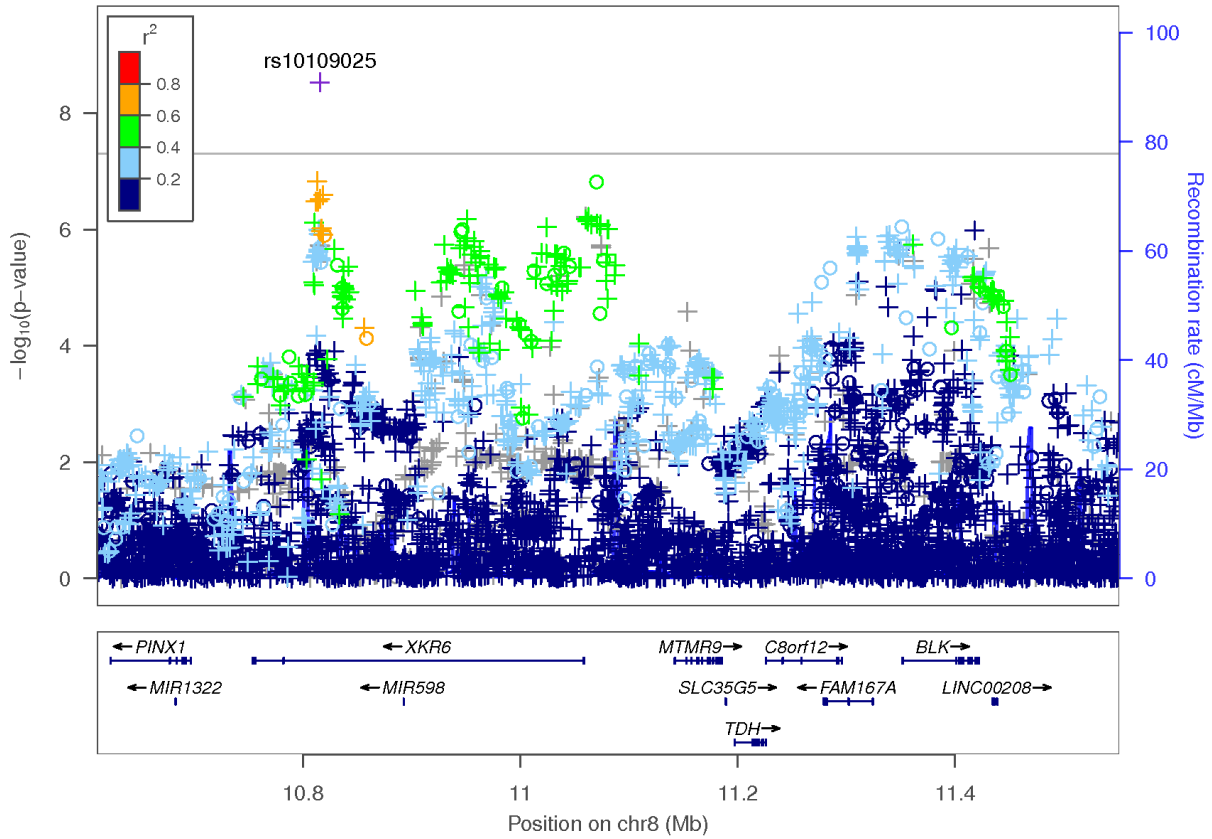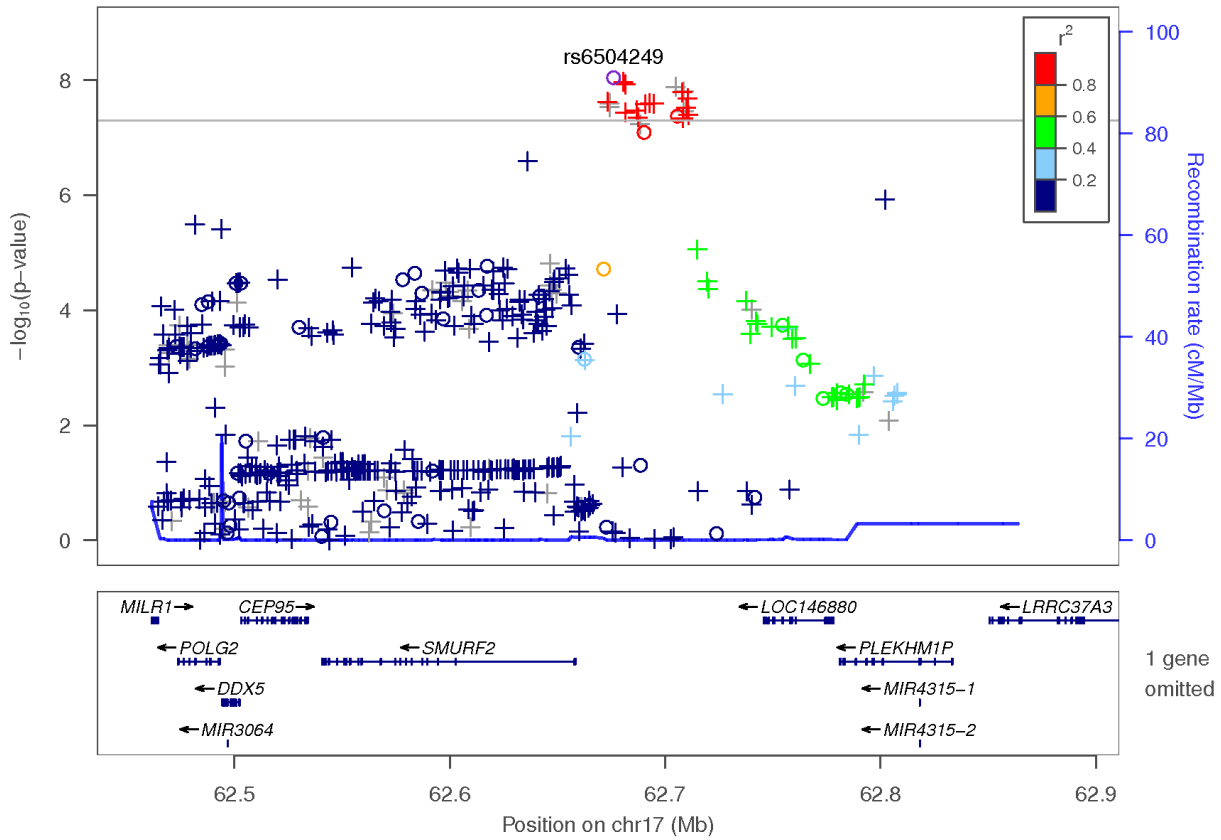

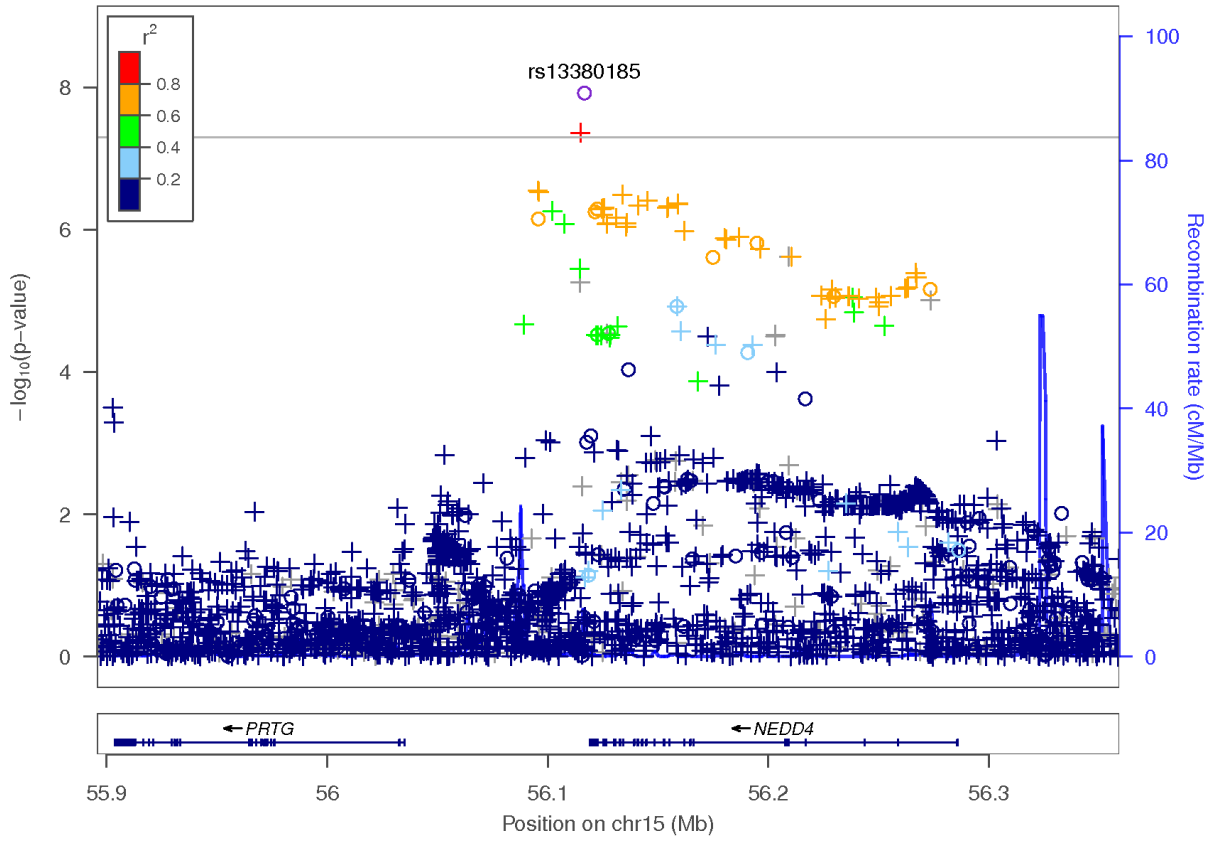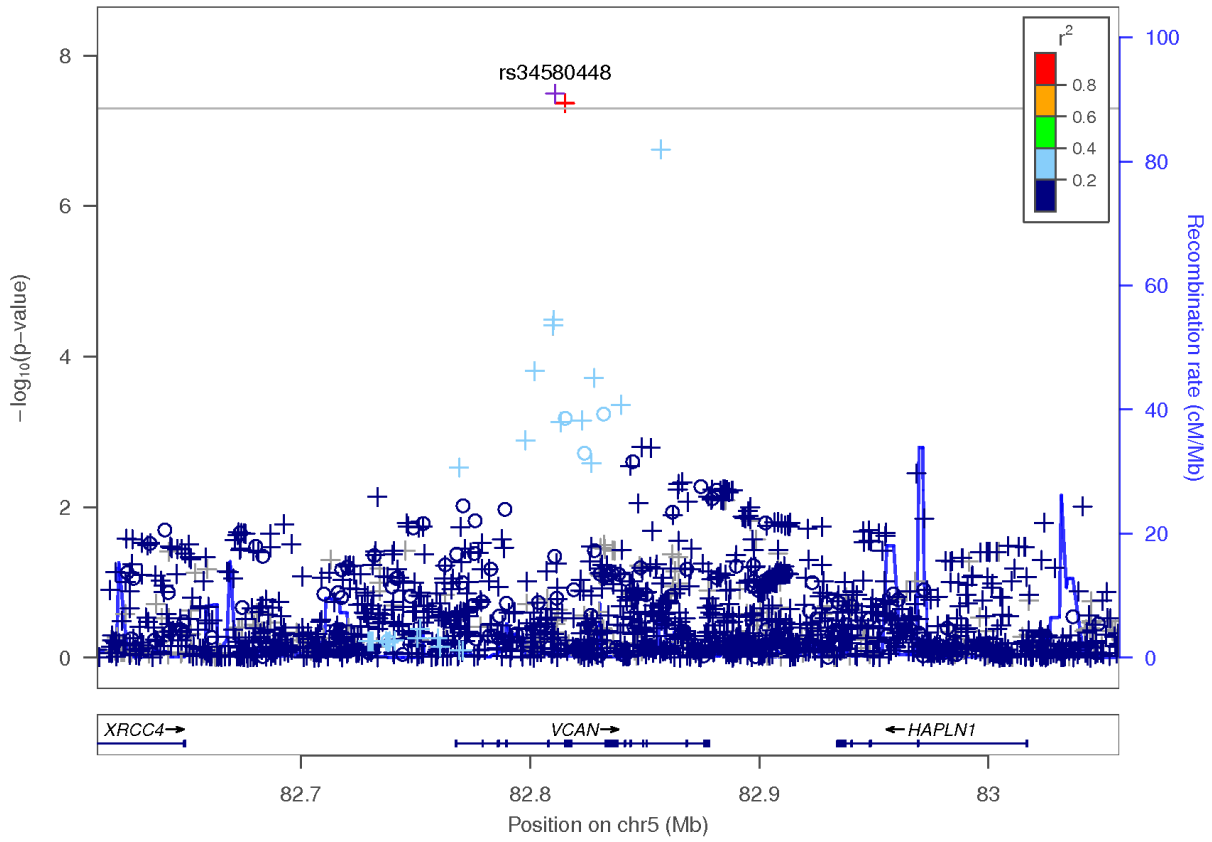

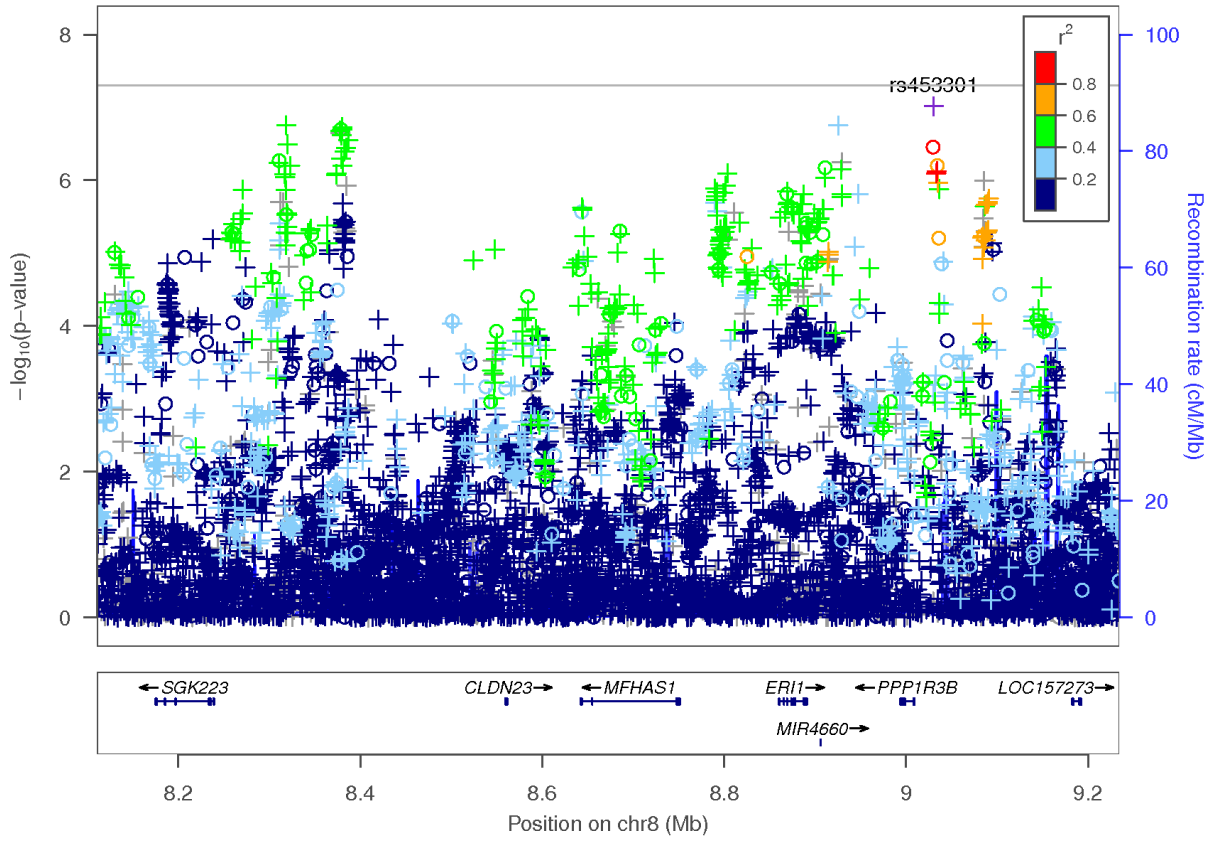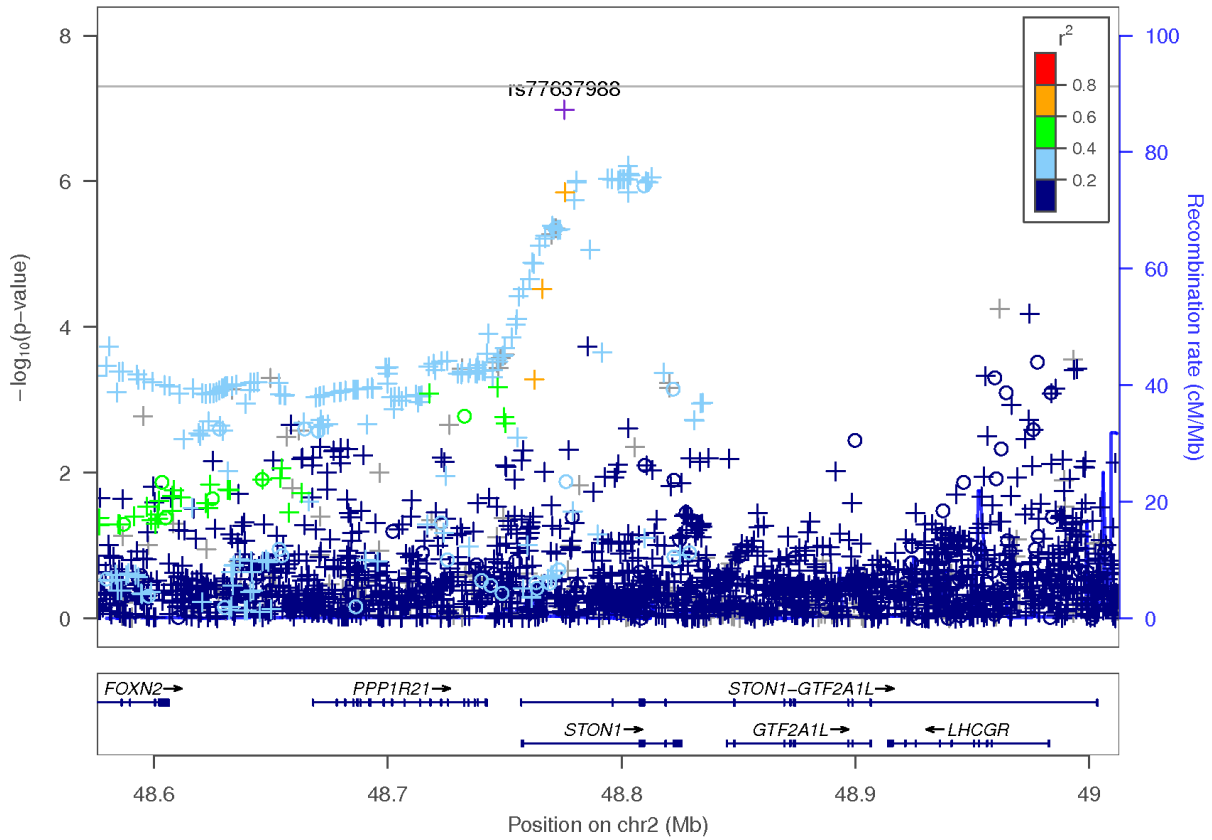

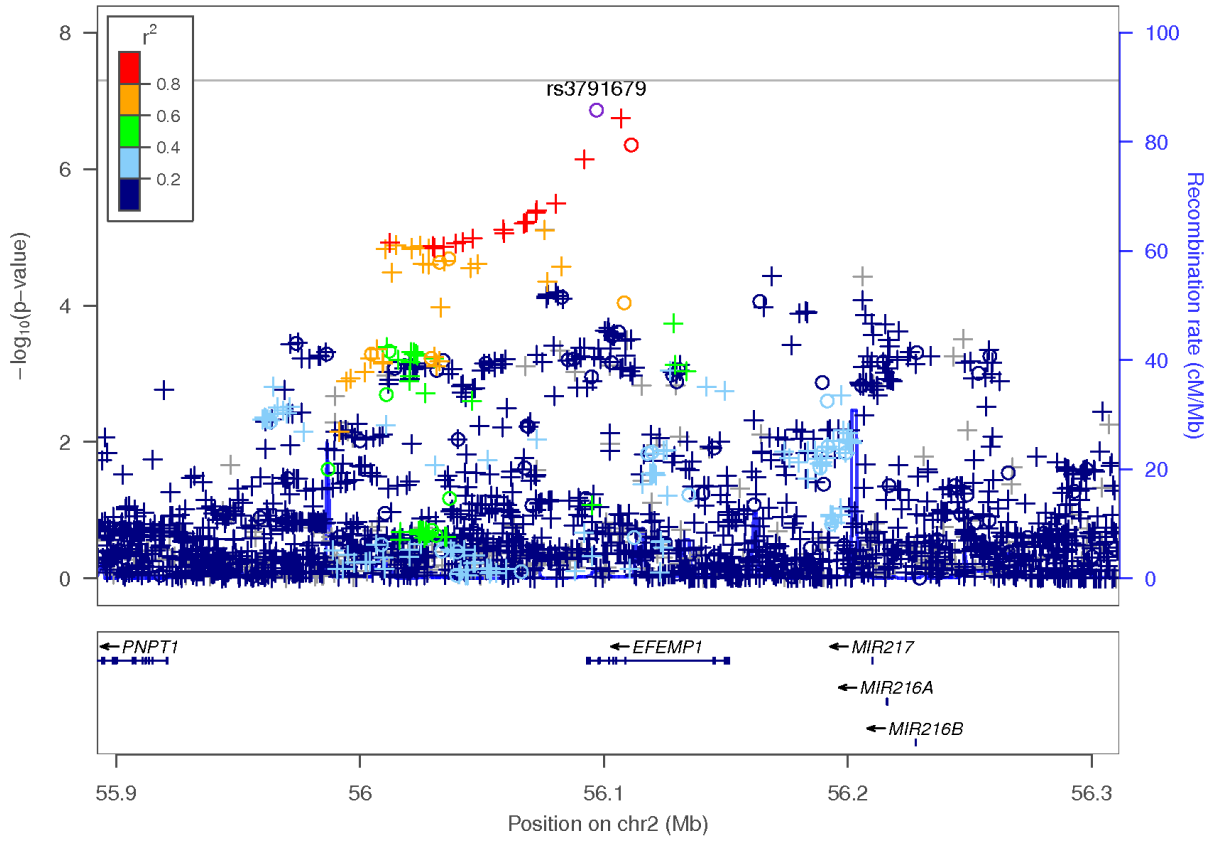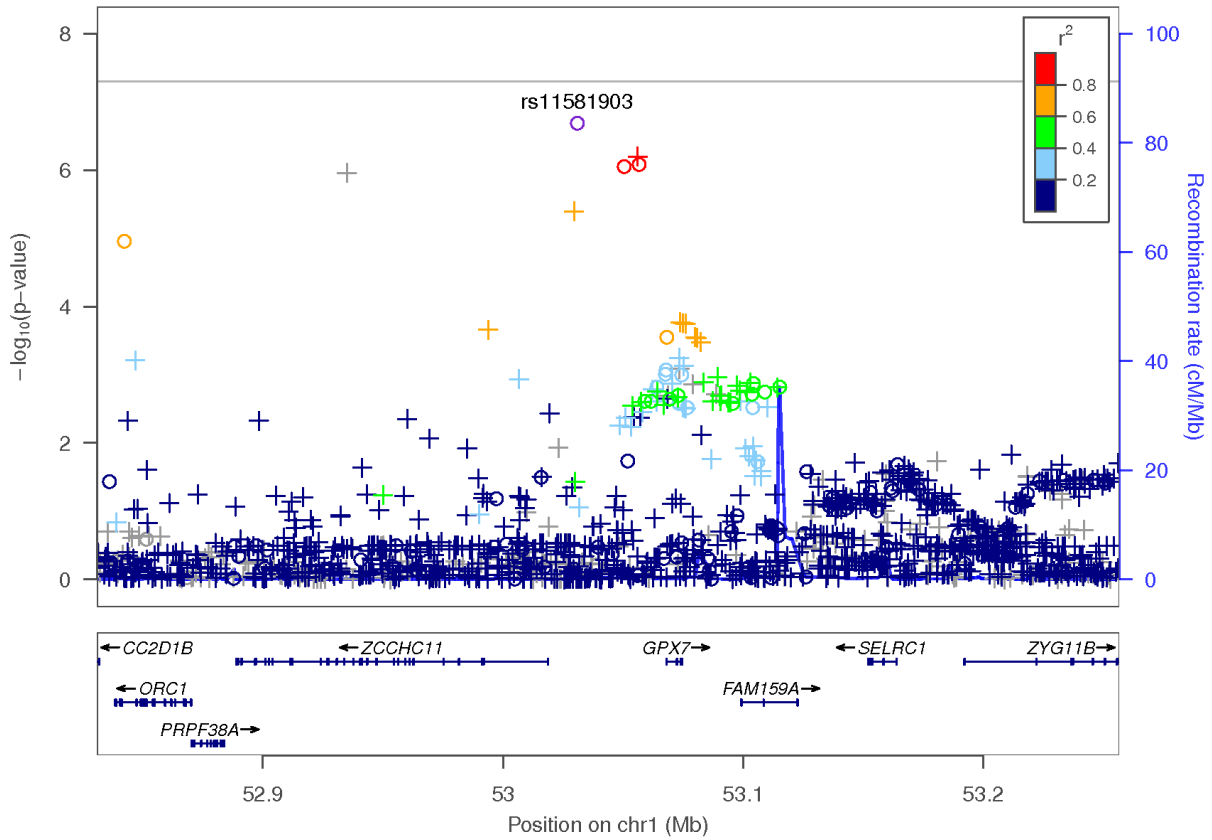

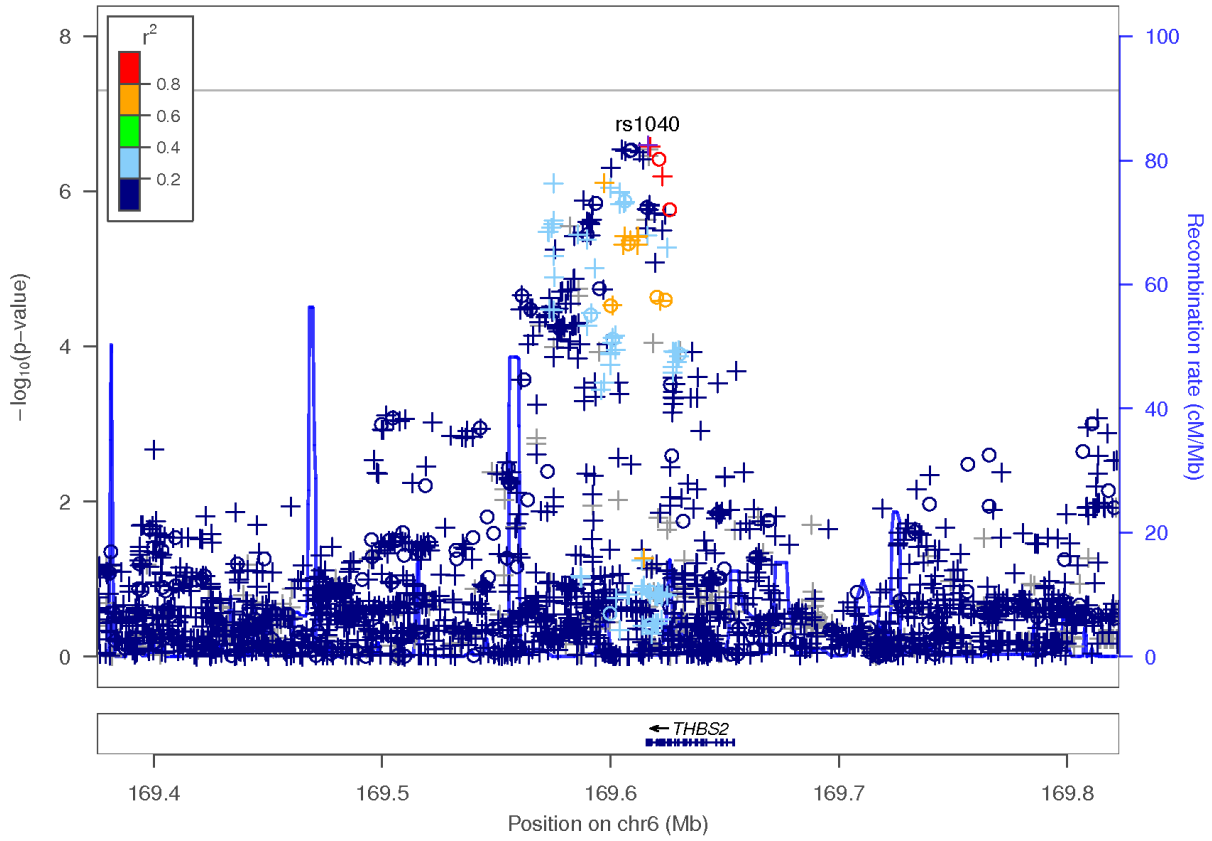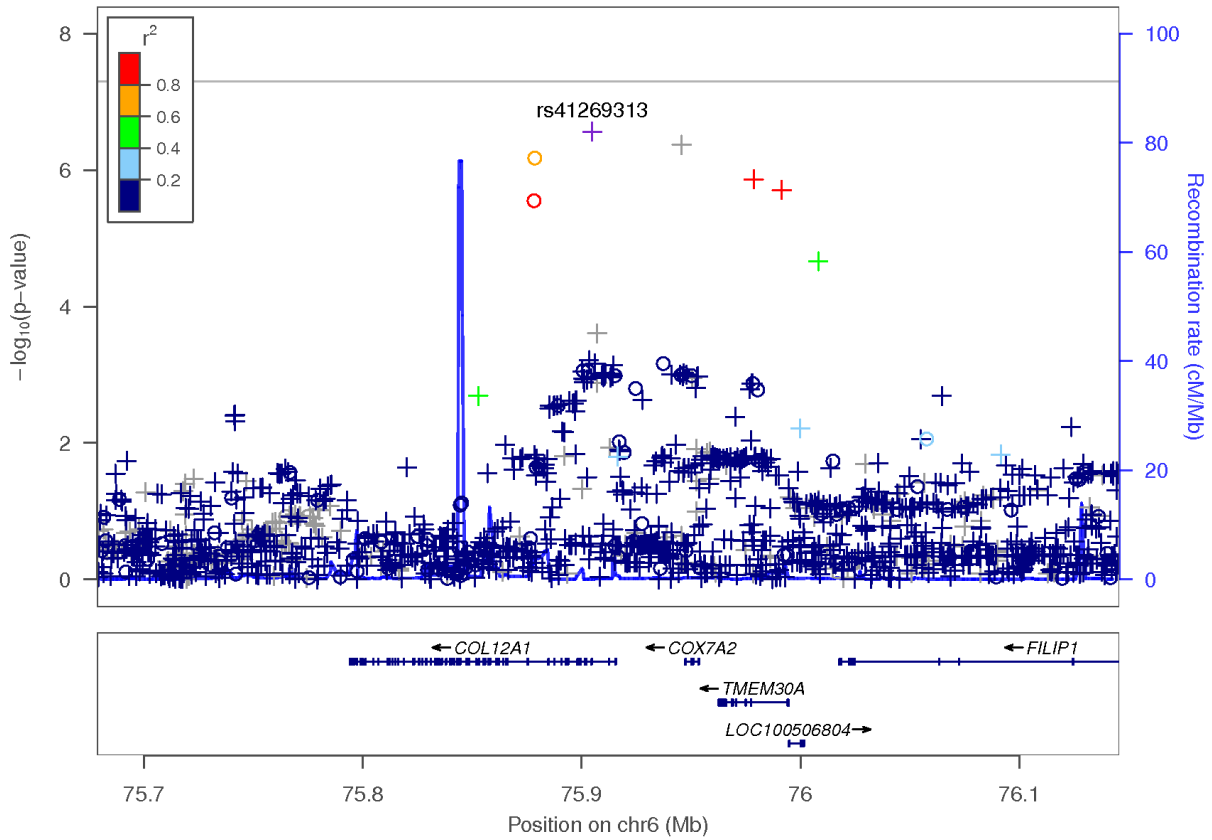



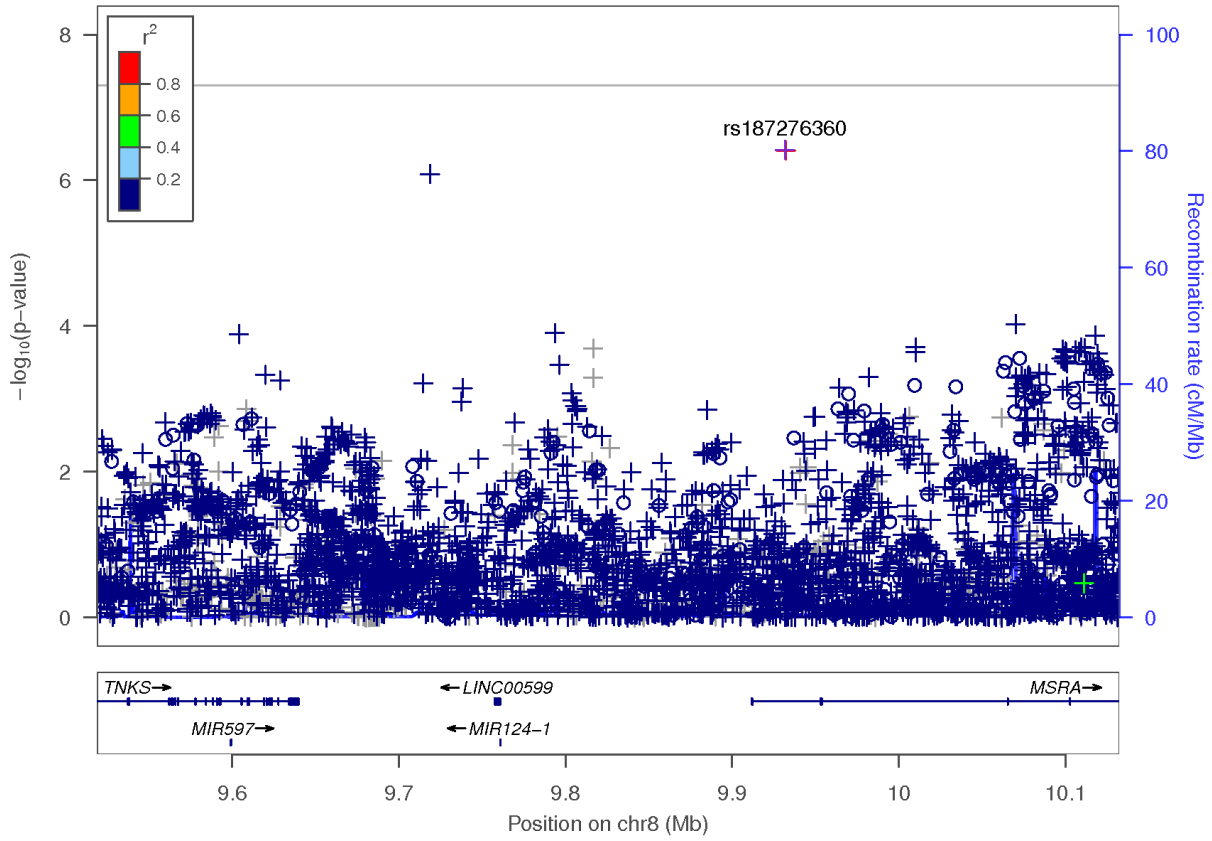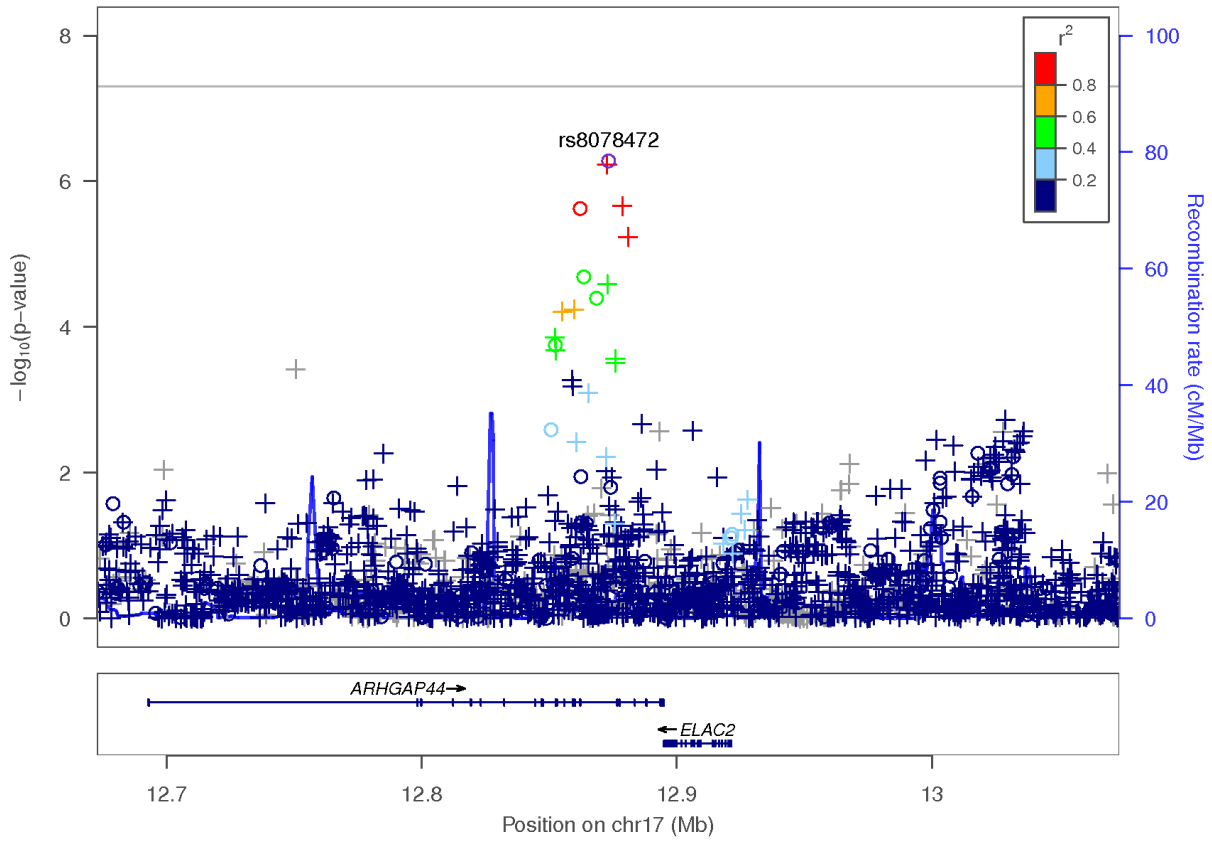

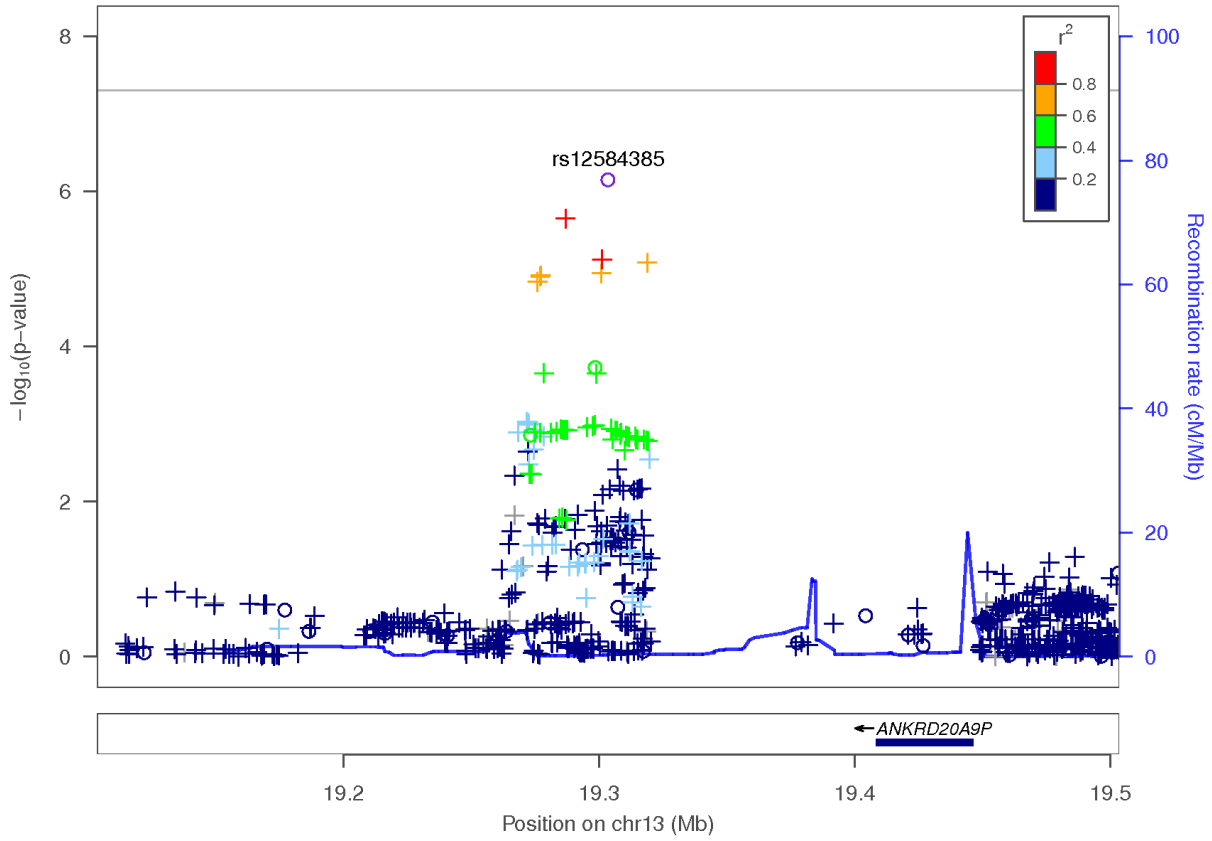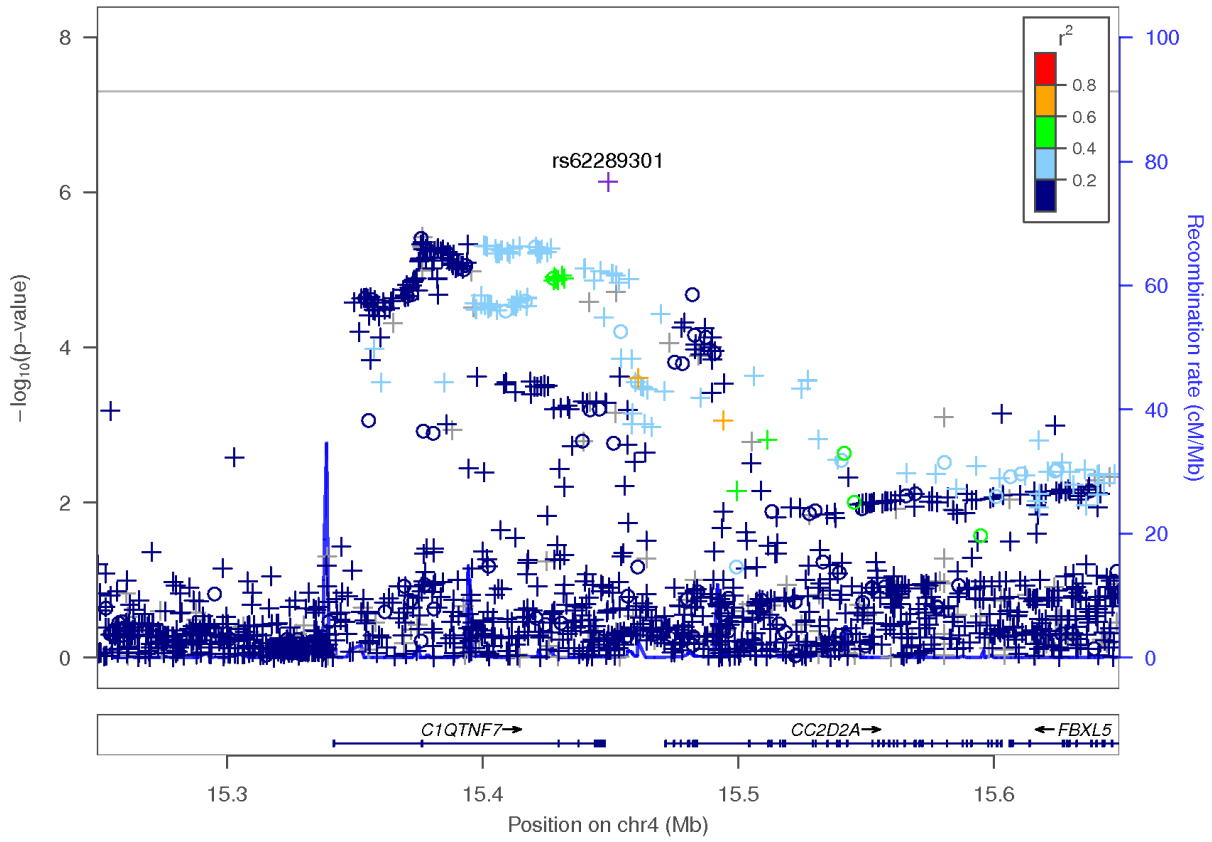

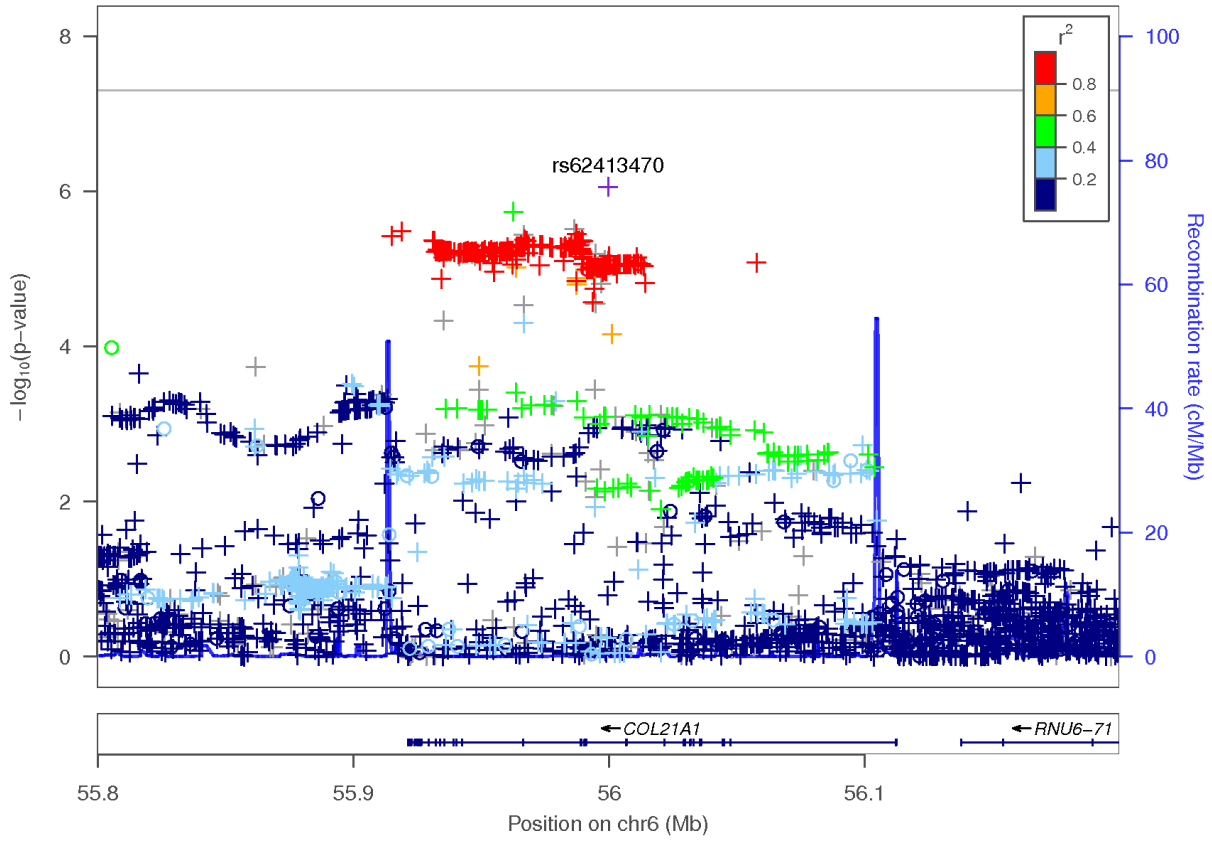

Supplement: NIHMS780506-supplement-9.pdf [file NIHMS780506-supplement-9.pdf]
