# Supplementary material
Source: PubMed Central journal article supplement (PMC5207801)

# Analysis Summary: Hypothyroidism

---

## Phenotype Description

---

Cases come from three sources:

- A positive report of a hypothyroidism diagnosis:
  - Your Medical History:
    - "Have you ever been diagnosed with hypothyroidism (underactive thyroid)?" (Yes, No, I'm not sure)
  - Research Snippet:
    - "Have you ever been diagnosed by a doctor with any of the following thyroid conditions?"/ "Hypothyroidism" (Yes, No, I don't know)
  - Baldness survey:
    - "Have you been diagnosed with any of the following? Please check all that apply: Hypothyroidism (underactive thyroid)" (Yes, No)
  - Health Intake survey
    - "Have you ever been diagnosed with or treated for any of the following conditions? (Any type of thyroid disease, not cancer)"
    - "What type of thyroid disease were you diagnosed with?" (Hashimoto's thyroiditis)
- Report of thyroid hormone replacement medication on either of two Research Snippets:
  - "Do you currently take medication for hypothyroidism (low thyroid hormone levels)?" (Yes, No, I'm not sure)
  - "Do you take any thyroid hormone replacement medications (such as Levothroid, Levoxyl, or Synthroid)?"
- Reported elevated TSH levels, from one Research Snippet:
  - "Have you ever been told by a doctor that your thyroid stimulating hormone (TSH) levels were elevated, indicating hypothyroidism?" (Yes, No, I'm not sure)

Controls answered none of these questions affirmatively and at least one negatively.

Exclusions:

- Hyperthyroidism (general health or baldness surveys)
  - "Have you ever been diagnosed by a doctor with any of the following thyroid conditions? Hyperthyroidism (Yes, No, I don't know)"
- thyroid cancer (general health or cancer surveys or `iqb.thyroid_cancer`)
  - "Have you ever been diagnosed by a doctor with any of the following common cancers? Thyroid Cancer (Yes, No, I don't know)"
  - "What type(s) of cancer were you diagnosed with? Please check all that apply: Thyroid cancer (Yes, No)"
- radioactive iodine treatment (`iqb.iodine_treatment_ever`)
  - "Have you ever received radioactive iodine treatment for goiter or hyperthyroidism (overactive thyroid)?" (Yes, No, I'm not sure)
- thyroid removal (`iqb.thyroid_removed`)
  - "Have you ever had all or part of your thyroid surgically removed?" (Yes, No, I'm not sure)

## Phenotype Statistics

---

The following table shows demographics of unrelated, European individuals included in the GWAS.

| Phenotype      | Group   | Total  | M     | F     | (0,30] | (30,45] | (45,60] | (60,Inf] |
|----------------|---------|--------|-------|-------|--------|---------|---------|----------|
| hypothyroidism | case    | 17558  | 3903  | 13655 | 804    | 3135    | 5453    | 8166     |
|                | control | 117083 | 67264 | 49819 | 16231  | 36526   | 31197   | 33129    |

The following table shows the phenotypic distribution across 23andMe genotyping platforms for individuals included in the GWAS.

---

| Phenotype      | Group   | Total  | v1/v2 | v3    | v4   |
|----------------|---------|--------|-------|-------|------|
| hypothyroidism | case    | 17558  | 1651  | 14058 | 1849 |
|                | control | 117083 | 14079 | 93136 | 9868 |

## Null Model with Covariates

The following table shows results of fitting a model for the trait based on just the covariates. Principal coordinates have been standardized, so these effect sizes are in units of standard deviations.

|      | Estimate | Std. Error | z value | Pr(> z )             | LRT    | Pr(>Chi)             |
|------|----------|------------|---------|----------------------|--------|----------------------|
| age  | 0.03350  | 0.000563   | 59.5    | 0.0                  | 3770.6 | 0.0                  |
| sexF | 1.56816  | 0.019390   | 80.9    | 0.0                  | 7786.6 | 0.0                  |
| pc.0 | -0.01679 | 0.008434   | -2.0    | 0.047                | 3.9    | 0.048                |
| pc.1 | -0.01530 | 0.008977   | -1.7    | 0.088                | 2.9    | 0.087                |
| pc.2 | -0.02803 | 0.009003   | -3.1    | 0.0018               | 9.8    | 0.0018               |
| pc.3 | -0.00722 | 0.008729   | -0.8    | 0.41                 | 0.7    | 0.41                 |
| pc.4 | 0.04648  | 0.009549   | 4.9     | $1.1 \times 10^{-6}$ | 24.9   | $6.2 \times 10^{-7}$ |

## SNP-level QC information

The following table shows results for QC filters on the genotyped data:

|                         | failed | passed  |
|-------------------------|--------|---------|
| no filters              | 0      | 1030430 |
| not V1-only, chrM, chrY | 4790   | 1025640 |
| parent-offspring test   | 2129   | 1023511 |
| MAF > 0%                | 3203   | 1020494 |
| HWE > 1e-20             | 48225  | 972832  |
| gt.rate > 90%           | 30775  | 952826  |
| batch effects           | 28267  | 945446  |

The following table shows results for QC filters on the imputed dosage data:

|                    | failed | passed   |
|--------------------|--------|----------|
| no filters         | 0      | 13733809 |
| MAF > 0%           | 0      | 13733809 |
| imputation quality | 0      | 13733809 |
| batch effects      | 2168   | 13731641 |

The following table shows results for QC filters on the merged association test results:

|                    | passed   | total    |
|--------------------|----------|----------|
| imputed only       | 12833621 | 12833621 |
| both passed        | 898002   | 13731623 |
| genotyped only     | 47444    | 13779067 |
| no test result     | -10030   | 13769037 |
| failed to converge | -92626   | 13676411 |

## Genetic Association Tests

We performed logistic regression assuming an additive model for allelic effects, using the model:

$$\text{hypothyroidism} \sim \text{age} + \text{sex} + \text{pc.0} + \text{pc.1} + \text{pc.2} + \text{pc.3} + \text{pc.4} + \text{genotype}$$

This genome-wide association analysis includes data from 17558 cases and 117083 controls of European ancestry, filtered to remove close relatives.

The results in this report have been adjusted for a genomic control inflation factor  $\lambda=1.074$ . The equivalent inflation factor for 1000 cases and 1000 controls  $\lambda_{1000}= 1.002$  , and for 10000,  $\lambda_{10000}= 1.024$

## Manhattan Plot

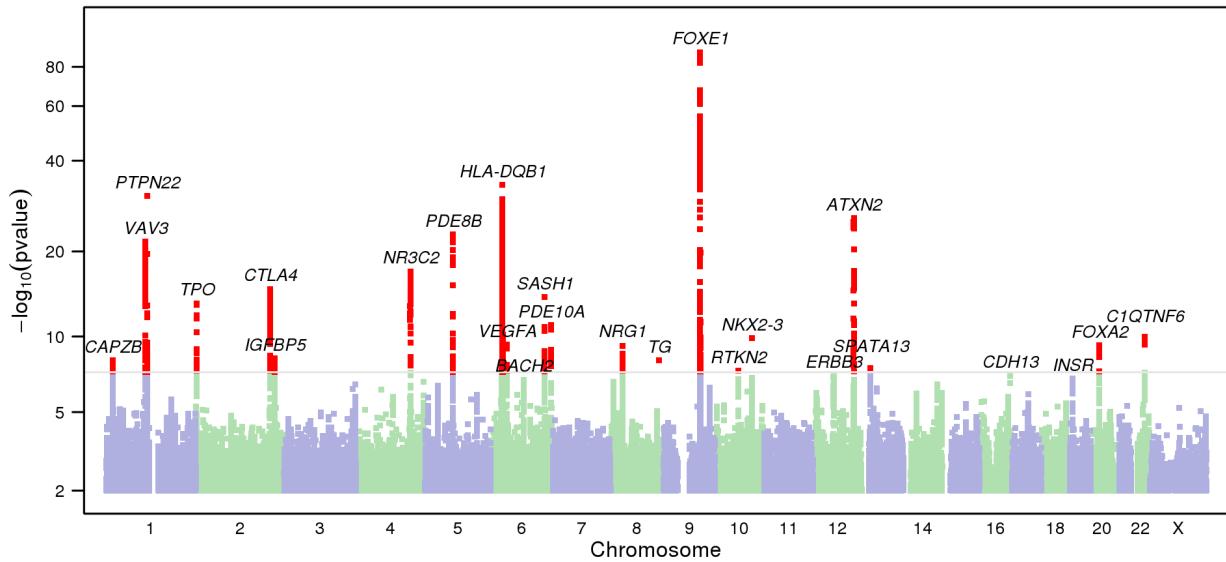

## Q-Q Plot of GWAS Results

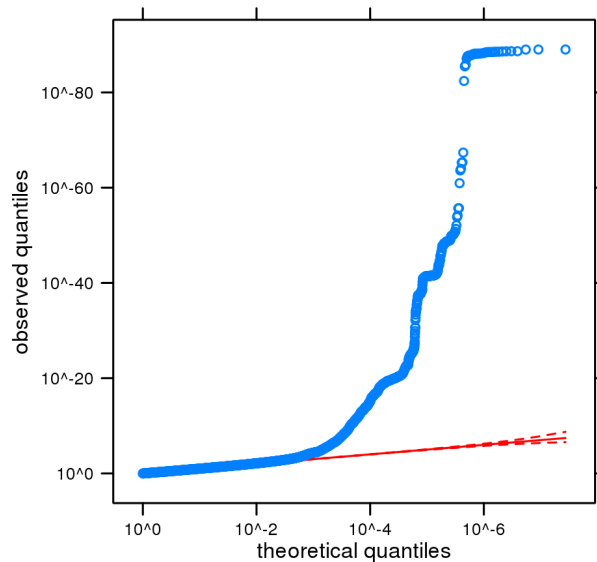

## Index SNPs for Strongest Associations

| cytoband | assay.name | scaffold | position  | alleles | src | pvalue                | OR    | 95% CI        | gene.context           |
|----------|------------|----------|-----------|---------|-----|-----------------------|-------|---------------|------------------------|
| 9q22.33  | rs10759927 | chr9     | 100542176 | A/G     | I   | $9.7 \times 10^{-90}$ | 1.313 | [1.278,1.349] | XPA--[--]FOX E1        |
| 6p21.32  | rs9273370  | chr6     | 32626492  | A/G     | I   | $4.5 \times 10^{-34}$ | 0.852 | [0.830,0.874] | HLA-DQA1--[--]HLA-DQB1 |
| 1p13.2   | rs2476601  | chr1     | 114377568 | A/G     | I   | $2.1 \times 10^{-31}$ | 0.786 | [0.755,0.818] | [PTPN22]               |
| 12q24.12 | rs10774625 | chr12    | 111910219 | A/G     | I   | $1.4 \times 10^{-26}$ | 0.875 | [0.854,0.897] | [ATXN2]                |
| 5q13.3   | rs1479567  | chr5     | 76528022  | A/G     | I   | $1.4 \times 10^{-23}$ | 0.880 | [0.859,0.902] | [PDE8B]                |
| 1p13.3   | rs17020055 | chr1     | 108336533 | A/C     | I   | $2.7 \times 10^{-22}$ | 1.225 | [1.177,1.276] | [VAV3]                 |
| 4q31.23  | rs76342258 | chr4     | 149631793 | G/T     | I   | $8.1 \times 10^{-18}$ | 0.870 | [0.843,0.899] | NR3C2---[]             |
| 2q33.2   | rs3087243  | chr2     | 204738919 | A/G     | I   | $1.4 \times 10^{-15}$ | 1.105 | [1.079,1.133] | CTLA4[--]ICOS          |
| 6q24.3   | rs6914622  | chr6     | 148514301 | G/T     | I   | $1.2 \times 10^{-14}$ | 1.109 | [1.081,1.139] | SAMD5---[--]SASH1      |
| 2p25.3   | rs11675342 | chr2     | 1407628   | C/T     | I   | $6.4 \times 10^{-14}$ | 1.099 | [1.072,1.126] | SNTG2--[--]TPO         |

|          |                  |       |           |     |   |                       |       |               |                       |
|----------|------------------|-------|-----------|-----|---|-----------------------|-------|---------------|-----------------------|
| 6q27     | rs1079418        | chr6  | 166047034 | A/G | I | 9.3×10 <sup>-12</sup> | 0.912 | [0.888,0.937] | [PDE10A]              |
| 22q12.3  | 22:37583733:C	CG | chr22 | 37583733  | D/I | I | 1.0×10 <sup>-10</sup> | 1.085 | [1.059,1.113] | [C1QTNF6]             |
| 10q24.2  | rs10748781       | chr10 | 101283330 | A/C | I | 1.4×10 <sup>-10</sup> | 1.088 | [1.060,1.116] | GOT1--[-]-NKX2-3      |
| 6p21.1   | rs10223666       | chr6  | 43805502  | C/G | I | 4.6×10 <sup>-10</sup> | 0.917 | [0.893,0.943] | VEGFA--[-]---C6orf223 |
| 20p11.21 | rs201295667      | chr20 | 22630515  | D/I | I | 5.4×10 <sup>-10</sup> | 0.902 | [0.873,0.932] | FOXA2--[-]---SSTR4    |
| 8p12     | rs2466075        | chr8  | 32432949  | A/G | I | 5.9×10 <sup>-10</sup> | 1.084 | [1.057,1.112] | [NRG1]                |
| 2q35     | rs1861628        | chr2  | 217628430 | A/G | I | 5.6×10 <sup>-9</sup>  | 1.087 | [1.057,1.118] | IGFBP5--[-]---TNP1    |
| 8q24.22  | rs121912648      | chr8  | 133894854 | C/T | G | 7.3×10 <sup>-9</sup>  | 3.657 | [2.432,5.497] | [TG]                  |
| 1p36.13  | rs12138950       | chr1  | 19839115  | A/C | I | 7.5×10 <sup>-9</sup>  | 0.903 | [0.872,0.935] | CAPZB--[-]---MINOS1   |
| 13q12.12 | rs9511143        | chr13 | 24774647  | C/T | I | 2.6×10 <sup>-8</sup>  | 0.920 | [0.894,0.948] | [SPATA13]             |
| 10q21.2  | rs10821973       | chr10 | 64052337  | A/G | I | 4.1×10 <sup>-8</sup>  | 1.073 | [1.046,1.100] | RTKN2--[-]---ZNF365   |
| 12q13.2  | rs7312770        | chr12 | 56467587  | C/T | I | 8.0×10 <sup>-8</sup>  | 0.932 | [0.908,0.956] | RPS26--[-]-ERBB3      |
| 16q23.3  | rs7193703        | chr16 | 83658143  | A/G | I | 8.4×10 <sup>-8</sup>  | 0.049 | [0.010,0.252] | [CDH13]               |
| 19p13.2  | rs7508679        | chr19 | 7222832   | C/T | I | 1.3×10 <sup>-7</sup>  | 0.935 | [0.912,0.959] | [INSR]                |
| 6q15     | rs661713         | chr6  | 90975999  | A/G | I | 1.5×10 <sup>-7</sup>  | 0.935 | [0.912,0.959] | [BACH2]               |

## Quality Statistics for Index SNPs

| assay.name       | is.v2 | is.v3 | is.v4 | gt.rate | hw.p.value            | p.date                | freq.b | avg.rsqr | min.rsqr | p.batch | dose.b | qc.mask |
|------------------|-------|-------|-------|---------|-----------------------|-----------------------|--------|----------|----------|---------|--------|---------|
| rs10759927       | FALSE | FALSE | FALSE |         |                       |                       |        | 0.9923   | 0.9861   | 0.040   | 0.6669 | v2v3v4  |
| rs9273370        | FALSE | FALSE | FALSE |         |                       |                       |        | 0.9472   | 0.9091   | 0.022   | 0.3988 | v2v3v4  |
| rs2476601        | TRUE  | TRUE  | TRUE  | 0.9999  | 0.0080                | 0.82                  | 0.9067 | 0.9996   | 0.9990   | 0.069   | 0.9081 | v2v3v4  |
| rs10774625       | FALSE | TRUE  | FALSE | 0.9997  | 0.00029               | 0.013                 | 0.4893 | 0.9970   | 0.9702   | 0.28    | 0.4912 | v2v3v4  |
| rs1479567        | FALSE | FALSE | FALSE |         |                       |                       |        | 0.9958   | 0.9945   | 0.60    | 0.6067 | v2v3v4  |
| rs17020055       | TRUE  | TRUE  | TRUE  | 0.9990  | 0.59                  | 0.035                 | 0.0901 | 1.0000   | 0.9996   | 0.22    | 0.0898 | v2v3v4  |
| rs76342258       | FALSE | FALSE | FALSE |         |                       |                       |        | 0.9958   | 0.9928   | 0.69    | 0.1896 | v2v3v4  |
| rs3087243        | TRUE  | TRUE  | TRUE  | 1.0000  | 0.00042               | 0.30                  | 0.5501 | 1.0000   | 0.9998   | 0.040   | 0.5483 | v2v3v4  |
| rs6914622        | FALSE | FALSE | FALSE |         |                       |                       |        | 0.9739   | 0.9599   | 0.079   | 0.3153 | v2v3v4  |
| rs11675342       | FALSE | TRUE  | FALSE | 0.9672  | 4.9×10 <sup>-12</sup> | 1.6×10 <sup>-12</sup> | 0.4435 | 0.9972   | 0.9851   | 0.022   | 0.4327 | v2v3v4  |
| rs1079418        | FALSE | FALSE | FALSE |         |                       |                       |        | 0.9979   | 0.9960   | 0.030   | 0.3197 | v2v3v4  |
| 22:37583733:C	CG | FALSE | FALSE | FALSE |         |                       |                       |        | 0.9857   | 0.9840   | 0.58    | 0.4297 | v2v3v4  |
| rs10748781       | FALSE | FALSE | FALSE |         |                       |                       |        | 0.9178   | 0.8617   | 0.019   | 0.4196 | v2v3v4  |
| rs10223666       | FALSE | FALSE | FALSE |         |                       |                       |        | 0.9875   | 0.8875   | 0.67    | 0.2984 | v2v3v4  |
| rs201295667      | FALSE | FALSE | FALSE |         |                       |                       |        | 0.6496   | 0.6287   | 0.0018  | 0.3315 | v2v3v4  |
| rs2466075        | FALSE | FALSE | FALSE |         |                       |                       |        | 0.9177   | 0.9115   | 0.042   | 0.4960 | v2v3v4  |
| rs1861628        | TRUE  | TRUE  | TRUE  | 0.9981  | 0.0014                | 0.96                  | 0.7409 | 0.9981   | 0.9958   | 0.16    | 0.7379 | v2v3v4  |
| rs121912648      | FALSE | TRUE  | TRUE  | 0.9999  | 1.0                   | 0.21                  | 0.0006 |          |          |         |        |         |
| rs12138950       | TRUE  | TRUE  | TRUE  | 0.9828  | 2.0×10 <sup>-10</sup> | 0.00013               | 0.1522 | 0.9979   | 0.9969   | 0.85    | 0.1538 | v2v3v4  |
| rs9511143        | FALSE | FALSE | FALSE |         |                       |                       |        | 0.8052   | 0.7718   | 0.84    | 0.6947 | v2v3v4  |
| rs10821973       | FALSE | FALSE | FALSE |         |                       |                       |        | 0.9655   | 0.9507   | 0.00080 | 0.4094 | v2v3v4  |
| rs7312770        | FALSE | FALSE | FALSE |         |                       |                       |        | 0.8993   | 0.8810   | 0.0022  | 0.5288 | v2v3v4  |
| rs7193703        | FALSE | FALSE | FALSE |         |                       |                       |        | 0.6404   | 0.3270   | 0.11    | 0.0006 | v2v3v4  |
| rs7508679        | TRUE  | TRUE  | TRUE  | 0.9926  | 0.78                  | 0.074                 | 0.4218 | 1.0000   | 0.9998   | 0.77    | 0.4209 | v2v3v4  |
| rs661713         | TRUE  | TRUE  | TRUE  | 0.9990  | 0.070                 | 0.36                  | 0.3952 | 0.9981   | 0.9973   | 0.19    | 0.3945 | v2v3v4  |

## SNP Statistics in the GWAS Sample

| assay.name       | AA.0   | AB.0  | BB.0  | im.num.0 | dose.b.0 | AA.1  | AB.1 | BB.1  | im.num.1 | dose.b.1 |
|------------------|--------|-------|-------|----------|----------|-------|------|-------|----------|----------|
| rs10759927       |        |       |       | 117083   | 0.6606   |       |      |       | 17558    | 0.7135   |
| rs9273370        |        |       |       | 117083   | 0.4060   |       |      |       | 17558    | 0.3732   |
| rs2476601        | 965    | 19243 | 96872 | 117083   | 0.9095   | 223   | 3407 | 13928 | 17558    | 0.8902   |
| rs10774625       | 24071  | 46186 | 22862 | 117083   | 0.4934   | 4033  | 6958 | 3063  | 17558    | 0.4643   |
| rs1479567        |        |       |       | 117083   | 0.6126   |       |      |       | 17558    | 0.5839   |
| rs17020055       | 97343  | 18674 | 920   | 117083   | 0.0878   | 14042 | 3295 | 201   | 17558    | 0.1054   |
| rs76342258       |        |       |       | 117083   | 0.1934   |       |      |       | 17558    | 0.1751   |
| rs3087243        | 24029  | 57734 | 35318 | 117083   | 0.5482   | 3259  | 8565 | 5733  | 17558    | 0.5704   |
| rs6914622        |        |       |       | 117083   | 0.3127   |       |      |       | 17558    | 0.3344   |
| rs11675342       | 28147  | 44731 | 17343 | 117083   | 0.4304   | 3892  | 6889 | 2856  | 17558    | 0.4533   |
| rs1079418        |        |       |       | 117083   | 0.3182   |       |      |       | 17558    | 0.3005   |
| 22:37583733:C	CG |        |       |       | 117083   | 0.4241   |       |      |       | 17558    | 0.4418   |
| rs10748781       |        |       |       | 117083   | 0.4164   |       |      |       | 17558    | 0.4332   |
| rs10223666       |        |       |       | 117083   | 0.2998   |       |      |       | 17558    | 0.2837   |
| rs201295667      |        |       |       | 117083   | 0.3322   |       |      |       | 17558    | 0.3190   |
| rs2466075        |        |       |       | 117083   | 0.4927   |       |      |       | 17558    | 0.5103   |
| rs1861628        | 8001   | 45089 | 63752 | 117083   | 0.7351   | 1086  | 6502 | 9935  | 17558    | 0.7490   |
| rs121912648      | 102896 | 99    | 0     |          |          | 15862 | 43   | 0     |          |          |
| rs12138950       | 82698  | 29545 | 2755  | 117083   | 0.1541   | 12767 | 4150 | 359   | 17558    | 0.1418   |
| rs9511143        |        |       |       | 117083   | 0.6961   |       |      |       | 17558    | 0.6828   |
| rs10821973       |        |       |       | 117083   | 0.4062   |       |      |       | 17558    | 0.4212   |
| rs7312770        |        |       |       | 117083   | 0.5290   |       |      |       | 17558    | 0.5140   |
| rs7193703        |        |       |       | 117083   | 0.0007   |       |      |       | 17558    | 0.0001   |
| rs7508679        | 38933  | 57085 | 20736 | 117083   | 0.4217   | 6133  | 8469 | 2893  | 17558    | 0.4068   |
| rs661713         | 42670  | 56245 | 18085 | 117083   | 0.3958   | 6718  | 8214 | 2615  | 17558    | 0.3837   |

# Annotations from NHGRI GWAS Catalog

The following table shows, for each index SNP, all entries in the NHGRI GWAS Catalog that are within 500kb and in at least moderate linkage disequilibrium ( $r^2 > 0.5$ ).

| region   | position  | our.name   | our.pval              | dist    | rsqr  | assay.name | pvalue                 | pubmed.id | trait                                         | genes                     |
|----------|-----------|------------|-----------------------|---------|-------|------------|------------------------|-----------|-----------------------------------------------|---------------------------|
| 9q22.33  | 100542176 | rs10759927 | $9.7 \times 10^{-90}$ | 4424    | 1.000 | rs925489   | $2.0 \times 10^{-19}$  | 22493691  | Hypothyroidism                                | KRT18P13, FOXE1, C9orf156 |
| 9q22.33  | 100542176 | rs10759927 | $9.7 \times 10^{-90}$ | 6837    | 0.994 | rs7850258  | $4.0 \times 10^{-9}$   | 21981779  | Hypothyroidism                                | FOXE1                     |
| 9q22.33  | 100542176 | rs10759927 | $9.7 \times 10^{-90}$ | 7852    | 0.994 | rs1443438  | $1.0 \times 10^{-9}$   | 23251661  | Obesity-related traits                        | XPA, FOXE1                |
| 9q22.33  | 100542176 | rs10759927 | $9.7 \times 10^{-90}$ | 13933   | 0.988 | rs965513   | $3.0 \times 10^{-10}$  | 23894154  | Thyroid cancer                                | FOXE1                     |
| 9q22.33  | 100542176 | rs10759927 | $9.7 \times 10^{-90}$ | 13933   | 0.988 | rs965513   | $5.0 \times 10^{-12}$  | 20350937  | Thyroid cancer (Papillary, radiation-related) | FOXE1, TMOD1, ...         |
| 9q22.33  | 100542176 | rs10759927 | $9.7 \times 10^{-90}$ | 13933   | 0.988 | rs965513   | $2.0 \times 10^{-27}$  | 19198613  | Thyroid cancer                                | FOXE1                     |
| 6p21.32  | 32626492  | rs9273370  | $4.5 \times 10^{-34}$ | -50014  | 0.508 | rs9271100  | $1.0 \times 10^{-12}$  | 19838193  | Systemic lupus erythematosus                  | HLA-DRB1                  |
| 6p21.32  | 32626492  | rs9273370  | $4.5 \times 10^{-34}$ | -22120  | 0.671 | rs9272346  | $2.0 \times 10^{-8}$   | 23181788  | Asthma                                        | HLA-DQA1                  |
| 6p21.32  | 32626492  | rs9273370  | $4.5 \times 10^{-34}$ | -22120  | 0.671 | rs9272346  | $6.0 \times 10^{-129}$ | 18978792  | Type 1 diabetes                               | HLA                       |
| 6p21.32  | 32626492  | rs9273370  | $4.5 \times 10^{-34}$ | -22120  | 0.671 | rs9272346  | $5.0 \times 10^{-134}$ | 17554300  | Type 1 diabetes                               | MHC                       |
| 1p13.2   | 114377568 | rs2476601  | $2.1 \times 10^{-31}$ | -73760  | 0.985 | rs6679677  | $2.0 \times 10^{-15}$  | 23128233  | Crohn's disease                               | PTPN22, DCLRE1B           |
| 1p13.2   | 114377568 | rs2476601  | $2.1 \times 10^{-31}$ | -73760  | 0.985 | rs6679677  | $3.0 \times 10^{-13}$  | 22493691  | Hypothyroidism                                | PHTF1, RSBN1, PTPN22      |
| 1p13.2   | 114377568 | rs2476601  | $2.1 \times 10^{-31}$ | -73760  | 0.985 | rs6679677  | $1.0 \times 10^{-40}$  | 18978792  | Type 1 diabetes                               | PTPN22                    |
| 1p13.2   | 114377568 | rs2476601  | $2.1 \times 10^{-31}$ | -73760  | 0.985 | rs6679677  | $6.0 \times 10^{-42}$  | 18794853  | Rheumatoid arthritis                          | PTPN22                    |
| 1p13.2   | 114377568 | rs2476601  | $2.1 \times 10^{-31}$ | -73760  | 0.985 | rs6679677  | $5.0 \times 10^{-26}$  | 17554300  | Type 1 diabetes                               | PTPN22                    |
| 1p13.2   | 114377568 | rs2476601  | $2.1 \times 10^{-31}$ | -73760  | 0.985 | rs6679677  | $6.0 \times 10^{-25}$  | 17554300  | Rheumatoid arthritis                          | PTPN22                    |
| 1p13.2   | 114377568 | rs2476601  | $2.1 \times 10^{-31}$ | -73760  | 0.985 | rs6679677  | $8.0 \times 10^{-24}$  | 17554260  | Type 1 diabetes                               | PHTF1, PTPN22             |
| 12q24.12 | 111910219 | rs10774625 | $1.4 \times 10^{-26}$ | -201761 | 0.533 | rs1265564  | $1.0 \times 10^{-16}$  | 22293688  | Type 1 diabetes                               | CUX2                      |
| 12q24.12 | 111910219 | rs10774625 | $1.4 \times 10^{-26}$ | -25611  | 0.934 | rs3184504  | $5.0 \times 10^{-11}$  | 24026423  | Platelet counts                               | SH2B3, ATXN2              |
| 12q24.12 | 111910219 | rs10774625 | $1.4 \times 10^{-26}$ | -25611  | 0.934 | rs3184504  | $3.0 \times 10^{-8}$   | 23417110  | Beta-2 microglobulin plasma levels            | SH2B3, ATXN2              |
| 12q24.12 | 111910219 | rs10774625 | $1.4 \times 10^{-26}$ | -25611  | 0.934 | rs3184504  | $4.0 \times 10^{-19}$  | 23222517  | Red blood cell traits                         | SH2B3, ATXN2              |
| 12q24.12 | 111910219 | rs10774625 | $1.4 \times 10^{-26}$ | -25611  | 0.934 | rs3184504  | $3.0 \times 10^{-12}$  | 22493691  | Hypothyroidism                                | SH2B3, ATXN2, ...         |
| 12q24.12 | 111910219 | rs10774625 | $1.4 \times 10^{-26}$ | -25611  | 0.934 | rs3184504  | $1.0 \times 10^{-26}$  | 22139419  | Platelet counts                               | SH2B3                     |
| 12q24.12 | 111910219 | rs10774625 | $1.4 \times 10^{-26}$ | -25611  | 0.934 | rs3184504  | $4.0 \times 10^{-25}$  | 21909115  | Diastolic blood pressure                      | SH2B3                     |
| 12q24.12 | 111910219 | rs10774625 | $1.4 \times 10^{-26}$ | -25611  | 0.934 | rs3184504  | $2.0 \times 10^{-38}$  | 21829393  | Type 1 diabetes autoantibodies                | SH2B3                     |
| 12q24.12 | 111910219 | rs10774625 | $1.4 \times 10^{-26}$ | -25611  | 0.934 | rs3184504  | $6.0 \times 10^{-6}$   | 21378990  | Coronary heart disease                        | SH2B3                     |
| 12q24.12 | 111910219 | rs10774625 | $1.4 \times 10^{-26}$ | -25611  | 0.934 | rs3184504  | $6.0 \times 10^{-6}$   | 20453842  | Rheumatoid arthritis                          | SH2B3                     |
| 12q24.12 | 111910219 | rs10774625 | $1.4 \times 10^{-26}$ | -25611  | 0.934 | rs3184504  | $3.0 \times 10^{-27}$  | 19430480  | Type 1 diabetes                               | SH2B3                     |
| 12q24.12 | 111910219 | rs10774625 | $1.4 \times 10^{-26}$ | -25611  | 0.934 | rs3184504  | $5.0 \times 10^{-9}$   | 19430479  | Systolic blood pressure                       | SH2B3                     |
| 12q24.12 | 111910219 | rs10774625 | $1.4 \times 10^{-26}$ | -25611  | 0.934 | rs3184504  | $3.0 \times 10^{-14}$  | 19430479  | Diastolic blood pressure                      | SH2B3                     |
| 12q24.12 | 111910219 | rs10774625 | $1.4 \times 10^{-26}$ | -25611  | 0.934 | rs3184504  | $7.0 \times 10^{-19}$  | 19198610  | Eosinophil counts                             | SH2B3                     |
| 12q24.12 | 111910219 | rs10774625 | $1.4 \times 10^{-26}$ | -5848   | 0.989 | rs4766578  | $4.0 \times 10^{-18}$  | 22561518  | Vitiligo                                      | SH2B3                     |
| 12q24.12 | 111910219 | rs10774625 | $1.4 \times 10^{-26}$ | 0       | 1.000 | rs10774625 | $2.0 \times 10^{-13}$  | 21060863  | Retinal vascular caliber                      | ATXN2, PTPN11, SH2B3      |
| 12q24.12 | 111910219 | rs10774625 | $1.4 \times 10^{-26}$ | 97537   | 0.933 | rs653178   | $7.0 \times 10^{-12}$  | 23263486  | Urate levels                                  | ATXN2, PTPN11             |
| 12q24.12 | 111910219 | rs10774625 | $1.4 \times 10^{-26}$ | 97537   | 0.933 | rs653178   | $7.0 \times 10^{-20}$  | 21909110  | Blood pressure                                | ATXN2                     |
| 12q24.12 | 111910219 | rs10774625 | $1.4 \times 10^{-26}$ | 97537   | 0.933 | rs653178   | $3.0 \times 10^{-19}$  | 21383967  | Celiac disease and Rheumatoid arthritis       | SH2B3                     |
| 12q24.12 | 111910219 | rs10774625 | $1.4 \times 10^{-26}$ | 97537   | 0.933 | rs653178   | $4.0 \times 10^{-11}$  | 20383146  | Chronic kidney disease                        | ATXN2                     |
| 12q24.12 | 111910219 | rs10774625 | $1.4 \times 10^{-26}$ | 97537   | 0.933 | rs653178   | $7.0 \times 10^{-21}$  | 20190752  | Celiac disease                                | SH2B3                     |
| 12q24.12 | 111910219 | rs10774625 | $1.4 \times 10^{-26}$ | 97537   | 0.933 | rs653178   | $3.0 \times 10^{-18}$  | 19430483  | Diastolic blood pressure                      | ATXN2, SH2B3              |
| 12q24.12 | 111910219 | rs10774625 | $1.4 \times 10^{-26}$ | 97537   | 0.933 | rs653178   | $8.0 \times 10^{-8}$   | 18311140  | Celiac disease                                | SH2B3, ATXN2              |
| 12q24.12 | 111910219 | rs10774625 | $1.4 \times 10^{-26}$ | 162205  | 0.762 | rs11065987 | $8.0 \times 10^{-11}$  | 23297363  | Tetralogy of Fallot                           | PTPN11                    |
| 12q24.12 | 111910219 | rs10774625 | $1.4 \times 10^{-26}$ | 162205  | 0.762 | rs11065987 | $2.0 \times 10^{-9}$   | 20686565  | LDL cholesterol                               | BRAP                      |
| 12q24.12 | 111910219 | rs10774625 | $1.4 \times 10^{-26}$ | 162205  | 0.762 | rs11065987 | $7.0 \times 10^{-12}$  | 20686565  | Cholesterol, total                            | BRAP                      |
| 12q24.12 | 111910219 | rs10774625 | $1.4 \times 10^{-26}$ | 162205  | 0.762 | rs11065987 | $1.0 \times 10^{-11}$  | 19862010  | Hemoglobin                                    | TRAFD1                    |
| 12q24.12 | 111910219 | rs10774625 | $1.4 \times 10^{-26}$ | 162205  | 0.762 | rs11065987 | $1.0 \times 10^{-12}$  | 19862010  | Hematocrit                                    | SH2B3, ATXN2              |
| 5q13.3   | 76528022  | rs1479567  | $1.4 \times 10^{-23}$ | -9580   | 0.962 | rs4704397  | $2.0 \times 10^{-6}$   | 22493691  | Hypothyroidism                                | PDE8B                     |
| 5q13.3   | 76528022  | rs1479567  | $1.4 \times 10^{-23}$ | -9580   | 0.962 | rs4704397  | $2.0 \times 10^{-20}$  | 18514160  | Thyroid stimulating hormone                   | PDE8B                     |
| 5q13.3   | 76528022  | rs1479567  | $1.4 \times 10^{-23}$ | -9580   | 0.962 | rs4704397  | $2.0 \times 10^{-20}$  | 18514160  | Thyroid hormone                               | PDE8B                     |

|         |           |            |                       |        |       |            |                       |          |                                |                    |
|---------|-----------|------------|-----------------------|--------|-------|------------|-----------------------|----------|--------------------------------|--------------------|
| 5q13.3  | 76528022  | rs1479567  | $1.4 \times 10^{-23}$ | 2327   | 0.984 | rs6885099  | $6.0 \times 10^{-24}$ | 23408906 | levels                         | PDE8B              |
| 5q13.3  | 76528022  | rs1479567  | $1.4 \times 10^{-23}$ | 7789   | 0.984 | rs2046045  | $3.0 \times 10^{-27}$ | 22494929 | Thyroid function               | PDE8B              |
| 1p13.3  | 108336533 | rs17020055 | $2.7 \times 10^{-22}$ | 29483  | 0.862 | rs4915077  | $8.0 \times 10^{-10}$ | 22493691 | Hypothyroidism                 | VAV3               |
| 4q31.23 | 149631793 | rs76342258 | $8.1 \times 10^{-18}$ | 3232   | 1.000 | rs10519980 | $7.0 \times 10^{-6}$  | 22493691 | Hypothyroidism                 | ATP5LP4, LOC285423 |
| 4q31.23 | 149631793 | rs76342258 | $8.1 \times 10^{-18}$ | 20817  | 1.000 | rs10028213 | $3.0 \times 10^{-10}$ | 22494929 | Thyroid function               | NR3C2              |
| 4q31.23 | 149631793 | rs76342258 | $8.1 \times 10^{-18}$ | 37713  | 0.967 | rs10032216 | $9.0 \times 10^{-16}$ | 23408906 | Thyroid hormone levels         | NR3C2              |
| 2q33.2  | 204738919 | rs3087243  | $1.4 \times 10^{-15}$ | -45043 | 0.673 | rs231735   | $6.0 \times 10^{-9}$  | 19503088 | Rheumatoid arthritis           | CTLA4              |
| 2q33.2  | 204738919 | rs3087243  | $1.4 \times 10^{-15}$ | 0      | 1.000 | rs3087243  | $2.0 \times 10^{-17}$ | 21829393 | Type 1 diabetes autoantibodies | CTLA4              |
| 2q33.2  | 204738919 | rs3087243  | $1.4 \times 10^{-15}$ | 0      | 1.000 | rs3087243  | $1.0 \times 10^{-8}$  | 20453842 | Rheumatoid arthritis           | CTLA4              |
| 2q33.2  | 204738919 | rs3087243  | $1.4 \times 10^{-15}$ | 0      | 1.000 | rs3087243  | $1.0 \times 10^{-15}$ | 19430480 | Type 1 diabetes                | CTLA4              |
| 2q33.2  | 204738919 | rs3087243  | $1.4 \times 10^{-15}$ | 0      | 1.000 | rs3087243  | $8.0 \times 10^{-11}$ | 18978792 | Type 1 diabetes                | CTLA4              |
| 6q24.3  | 148514301 | rs6914622  | $1.2 \times 10^{-14}$ | 6991   | 0.690 | rs9497965  | $3.0 \times 10^{-8}$  | 23408906 | Thyroid hormone levels         | SASH1              |
| 6q27    | 166047034 | rs1079418  | $9.3 \times 10^{-12}$ | -551   | 1.000 | rs753760   | $6.0 \times 10^{-20}$ | 23408906 | Thyroid hormone levels         | PDE10A             |
| 10q24.2 | 101283330 | rs10748781 | $1.4 \times 10^{-10}$ | 907    | 0.768 | rs4409764  | $1.0 \times 10^{-54}$ | 23128233 | Inflammatory bowel disease     | NKX2-3             |
| 10q24.2 | 101283330 | rs10748781 | $1.4 \times 10^{-10}$ | 907    | 0.768 | rs4409764  | $2.0 \times 10^{-20}$ | 21102463 | Crohn's disease                | NKX2-3             |
| 10q24.2 | 101283330 | rs10748781 | $1.4 \times 10^{-10}$ | 4434   | 0.760 | rs10883365 | $6.0 \times 10^{-8}$  | 17554300 | Crohn's disease                | NKX2-3             |
| 10q24.2 | 101283330 | rs10748781 | $1.4 \times 10^{-10}$ | 4434   | 0.760 | rs10883365 | $4.0 \times 10^{-10}$ | 17554261 | Crohn's disease                | NKX2-3             |
| 10q24.2 | 101283330 | rs10748781 | $1.4 \times 10^{-10}$ | 6971   | 0.702 | rs6584283  | $8.0 \times 10^{-21}$ | 21297633 | Ulcerative colitis             | Intergenic         |
| 10q24.2 | 101283330 | rs10748781 | $1.4 \times 10^{-10}$ | 6971   | 0.702 | rs6584283  | $2.0 \times 10^{-6}$  | 20228798 | Ulcerative colitis             | NKX2-3             |
| 10q24.2 | 101283330 | rs10748781 | $1.4 \times 10^{-10}$ | 6971   | 0.702 | rs6584283  | $2.0 \times 10^{-7}$  | 19915572 | Ulcerative colitis             | NKX2, NKX3         |
| 10q24.2 | 101283330 | rs10748781 | $1.4 \times 10^{-10}$ | 8263   | 0.748 | rs11190140 | $1.0 \times 10^{-8}$  | 20228799 | Ulcerative colitis             | NKX2-3             |
| 10q24.2 | 101283330 | rs10748781 | $1.4 \times 10^{-10}$ | 8263   | 0.748 | rs11190140 | $3.0 \times 10^{-16}$ | 18587394 | Crohn's disease                | NKX2-3             |
| 6p21.1  | 43805502  | rs10223666 | $4.6 \times 10^{-10}$ | -931   | 0.799 | rs729761   | $8.0 \times 10^{-16}$ | 23263486 | Urate levels                   | VEGFA              |
| 6p21.1  | 43805502  | rs10223666 | $4.6 \times 10^{-10}$ | 1107   | 0.981 | rs881858   | $9.0 \times 10^{-14}$ | 20383146 | Chronic kidney disease         | VEGFA              |
| 6p21.1  | 43805502  | rs10223666 | $4.6 \times 10^{-10}$ | 6260   | 0.870 | rs9472138  | $7.0 \times 10^{-16}$ | 23408906 | Thyroid hormone levels         | VEGFA              |
| 6p21.1  | 43805502  | rs10223666 | $4.6 \times 10^{-10}$ | 6260   | 0.870 | rs9472138  | $4.0 \times 10^{-6}$  | 18372903 | Type 2 diabetes                | VEGFA              |
| 2q35    | 217628430 | rs1861628  | $5.6 \times 10^{-9}$  | -2907  | 0.987 | rs13015993 | $8.0 \times 10^{-11}$ | 23408906 | Thyroid hormone levels         | IGFBP5             |
| 1p36.13 | 19839115  | rs12138950 | $7.5 \times 10^{-9}$  | 0      | 1.000 | rs12138950 | $3.0 \times 10^{-18}$ | 21565293 | Thyroid volume                 | CAPZB              |
| 1p36.13 | 19839115  | rs12138950 | $7.5 \times 10^{-9}$  | 2059   | 0.876 | rs10799824 | $4.0 \times 10^{-21}$ | 23408906 | Thyroid hormone levels         | CAPZB              |
| 12q13.2 | 56467587  | rs7312770  | $8.0 \times 10^{-8}$  | -76951 | 0.512 | rs705702   | $9.0 \times 10^{-26}$ | 22885925 | Polycystic ovary syndrome      | RAB5B, SUOX        |
| 12q13.2 | 56467587  | rs7312770  | $8.0 \times 10^{-8}$  | -66502 | 0.768 | rs10876864 | $8.0 \times 10^{-12}$ | 22951725 | Vitiligo                       | PMEL, DGKA, ...    |
| 12q13.2 | 56467587  | rs7312770  | $8.0 \times 10^{-8}$  | -55100 | 0.574 | rs1701704  | $2.0 \times 10^{-13}$ | 21804548 | Asthma                         | IKZF4              |
| 12q13.2 | 56467587  | rs7312770  | $8.0 \times 10^{-8}$  | -55100 | 0.574 | rs1701704  | $3.0 \times 10^{-8}$  | 20596022 | Alopecia areata                | IKZF4              |
| 12q13.2 | 56467587  | rs7312770  | $8.0 \times 10^{-8}$  | -55100 | 0.574 | rs1701704  | $9.0 \times 10^{-10}$ | 18198356 | Type 1 diabetes                | RAB5B, SUOX, ...   |
| 12q13.2 | 56467587  | rs7312770  | $8.0 \times 10^{-8}$  | -50659 | 0.574 | rs2456973  | $3.0 \times 10^{-14}$ | 22561518 | Vitiligo                       | IKZF4              |
| 12q13.2 | 56467587  | rs7312770  | $8.0 \times 10^{-8}$  | 3038   | 0.788 | rs11171739 | $1.0 \times 10^{-11}$ | 17554300 | Type 1 diabetes                | ERBB3              |
| 12q13.2 | 56467587  | rs7312770  | $8.0 \times 10^{-8}$  | 14593  | 0.578 | rs2292239  | $3.0 \times 10^{-27}$ | 21829393 | Type 1 diabetes autoantibodies | ERBB3              |
| 12q13.2 | 56467587  | rs7312770  | $8.0 \times 10^{-8}$  | 14593  | 0.578 | rs2292239  | $2.0 \times 10^{-25}$ | 19430480 | Type 1 diabetes                | ERBB3              |
| 12q13.2 | 56467587  | rs7312770  | $8.0 \times 10^{-8}$  | 14593  | 0.578 | rs2292239  | $3.0 \times 10^{-16}$ | 18978792 | Type 1 diabetes                | ERBB3              |
| 12q13.2 | 56467587  | rs7312770  | $8.0 \times 10^{-8}$  | 14593  | 0.578 | rs2292239  | $2.0 \times 10^{-20}$ | 17554260 | Type 1 diabetes                | ERBB3              |
| 19p13.2 | 7222832   | rs7508679  | $1.3 \times 10^{-7}$  | 1016   | 0.528 | rs4804416  | $3.0 \times 10^{-10}$ | 23408906 | Thyroid hormone levels         | INSR               |
| 19p13.2 | 7222832   | rs7508679  | $1.3 \times 10^{-7}$  | 1016   | 0.528 | rs4804416  | $5.0 \times 10^{-6}$  | 22493691 | Hypothyroidism                 | INSR               |
| 6q15    | 90975999  | rs661713   | $1.5 \times 10^{-7}$  | -54259 | 0.698 | rs370409   | $2.0 \times 10^{-6}$  | 21841780 | Graves' disease                | BACH2, MAP3K7      |
| 6q15    | 90975999  | rs661713   | $1.5 \times 10^{-7}$  | -18536 | 0.526 | rs3757247  | $3.0 \times 10^{-8}$  | 22561518 | Vitiligo                       | BACH2              |
| 6q15    | 90975999  | rs661713   | $1.5 \times 10^{-7}$  | -18536 | 0.526 | rs3757247  | $1.0 \times 10^{-6}$  | 18840781 | Type 1 diabetes                | BACH2              |
| 6q15    | 90975999  | rs661713   | $1.5 \times 10^{-7}$  | -17768 | 0.581 | rs11755527 | $3.0 \times 10^{-8}$  | 21829393 | Type 1 diabetes autoantibodies | BACH2              |
| 6q15    | 90975999  | rs661713   | $1.5 \times 10^{-7}$  | -17768 | 0.581 | rs11755527 | $5.0 \times 10^{-8}$  | 19430480 | Type 1 diabetes                | BACH2              |
| 6q15    | 90975999  | rs661713   | $1.5 \times 10^{-7}$  | -17768 | 0.581 | rs11755527 | $5.0 \times 10^{-12}$ | 18978792 | Type 1 diabetes                | BACH2              |
| 6q15    | 90975999  | rs661713   | $1.5 \times 10^{-7}$  | 20770  | 0.544 | rs12212193 | $4.0 \times 10^{-8}$  | 21833088 | Multiple sclerosis             | BACH2              |

## Replication of GWAS Catalog Results

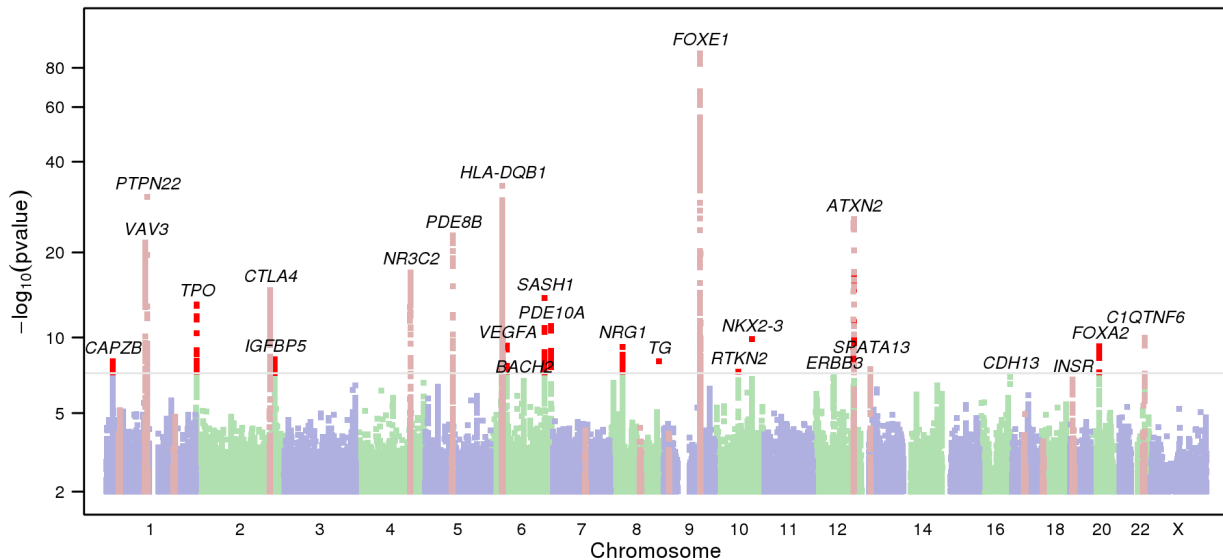

The following table shows, for each GWAS Catalog result for similar traits, our association test result for our best available proxy (distance < 100kb,  $r^2 > 0.8$ ).

| region   | position  | our.name   | our.pval              | dist | rsqr  | assay.name | pvalue                | pubmed.id | trait          | genes                                                                                                             |
|----------|-----------|------------|-----------------------|------|-------|------------|-----------------------|-----------|----------------|-------------------------------------------------------------------------------------------------------------------|
| 1p34.3   | 38279987  | rs3748682  | $6.9 \times 10^{-6}$  | 0    | 1.000 | rs3748682  | $9.0 \times 10^{-6}$  | 22493691  | Hypothyroidism | MTF1                                                                                                              |
| 1p13.3   | 108366016 | rs4915077  | $9.5 \times 10^{-21}$ | 0    | 1.000 | rs4915077  | $8.0 \times 10^{-10}$ | 22493691  | Hypothyroidism | VAV3                                                                                                              |
| 1p13.2   | 114303808 | rs6679677  | $2.2 \times 10^{-31}$ | 0    | 1.000 | rs6679677  | $3.0 \times 10^{-13}$ | 22493691  | Hypothyroidism | PHTF1, RSNB1, PTPN22                                                                                              |
| 1q31.1   | 187902981 | rs655167   | 0.0057                | 0    | 1.000 | rs655167   | $7.0 \times 10^{-6}$  | 22493691  | Hypothyroidism | LOC100129274                                                                                                      |
| 2q33.2   | 204734487 | rs231779   | $8.6 \times 10^{-14}$ | 0    | 1.000 | rs231779   | $7.0 \times 10^{-6}$  | 22493691  | Hypothyroidism | CTLA4                                                                                                             |
| 4q31.23  | 149635025 | rs10519980 | $1.6 \times 10^{-17}$ | 0    | 1.000 | rs10519980 | $7.0 \times 10^{-6}$  | 22493691  | Hypothyroidism | ATP5LP4, LOC285423                                                                                                |
| 5q13.3   | 76518442  | rs4704397  | $7.2 \times 10^{-23}$ | 0    | 1.000 | rs4704397  | $2.0 \times 10^{-6}$  | 22493691  | Hypothyroidism | PDE8B                                                                                                             |
| 6p21.33  | 31018407  | rs2517532  | $1.8 \times 10^{-23}$ | 0    | 1.000 | rs2517532  | $1.0 \times 10^{-8}$  | 22493691  | Hypothyroidism | LOC729792, HCG22, C6orf15, HLA-C, HLA-B, DHFRP2, HCP5, HLA-DRB9, HLA-DRB5, HLA-DRB1, HLA-DQA1, HLA-DQB1, HLA-DQA2 |
| 6p21.32  | 32663631  | rs3129720  | $2.5 \times 10^{-23}$ | 0    | 1.000 | rs3129720  | $5.0 \times 10^{-7}$  | 22493691  | Hypothyroidism | HLA-DQA2                                                                                                          |
| 7q21.13  | 88481442  | rs10248351 | 0.080                 | 0    | 1.000 | rs10248351 | $7.0 \times 10^{-6}$  | 22493691  | Hypothyroidism | C7orf62, ZNF804B                                                                                                  |
| 8q21.13  | 81438420  | rs1051920  | 0.011                 | 0    | 1.000 | rs1051920  | $4.0 \times 10^{-6}$  | 22493691  | Hypothyroidism | ZBTB10, RPSAP47                                                                                                   |
| 9p22.3   | 14470833  | rs10961534 | 0.00011               | 0    | 1.000 | rs10961534 | $7.0 \times 10^{-6}$  | 22493691  | Hypothyroidism | TRNAH, GUG, ZDHHC21                                                                                               |
| 9q22.33  | 100546600 | rs925489   | $2.2 \times 10^{-89}$ | 0    | 1.000 | rs925489   | $2.0 \times 10^{-19}$ | 22493691  | Hypothyroidism | KRT18P13, FOXE1, C9orf156                                                                                         |
| 9q22.33  | 100549013 | rs7850258  | $3.3 \times 10^{-89}$ | 0    | 1.000 | rs7850258  | $4.0 \times 10^{-9}$  | 21981779  | Hypothyroidism | FOXE1, SH2B3, ATXN2, LOC100101246, BRAP, NAA25, C12orf51, PTPN11                                                  |
| 12q24.12 | 111884608 | rs3184504  | $6.7 \times 10^{-26}$ | 0    | 1.000 | rs3184504  | $3.0 \times 10^{-12}$ | 22493691  | Hypothyroidism | SACS, TNFRSF19                                                                                                    |
| 13q12.12 | 24042510  | rs10162002 | 0.21                  | 0    | 1.000 | rs10162002 | $5.0 \times 10^{-6}$  | 22493691  | Hypothyroidism | LOC100131744, CCL2                                                                                                |
| 17q12    | 32464154  | rs9901756  | 0.61                  | 0    | 1.000 | rs9901756  | $7.0 \times 10^{-6}$  | 22493691  | Hypothyroidism | LOC100130480                                                                                                      |
| 18p11.31 | 6567182   | rs948426   | 0.037                 | 0    | 1.000 | rs948426   | $1.0 \times 10^{-6}$  | 22493691  | Hypothyroidism | LOC100130480                                                                                                      |
| 19p13.2  | 7223848   | rs4804416  | $1.0 \times 10^{-6}$  | 0    | 1.000 | rs4804416  | $5.0 \times 10^{-6}$  | 22493691  | Hypothyroidism | INSR                                                                                                              |
| 22q12.3  | 37581422  | rs229526   | $3.1 \times 10^{-7}$  | 0    | 1.000 | rs229526   | $9.0 \times 10^{-6}$  | 22493691  | Hypothyroidism | C1QTNF6                                                                                                           |

## Nearby Nonsynonymous SNPs

| region   | position  | our.name    | our.pval              | dist   | rsqr  | assay.name  | gene     | aa.chg |
|----------|-----------|-------------|-----------------------|--------|-------|-------------|----------|--------|
| 6p21.32  | 32626492  | rs9273370   | $4.5 \times 10^{-34}$ | -21235 | 0.598 | rs1047989   | HLA-DQA1 | L8M    |
| 6p21.32  | 32626492  | rs9273370   | $4.5 \times 10^{-34}$ | -17387 | 0.613 | rs1129740   | HLA-DQA1 | C34Y   |
| 6p21.32  | 32626492  | rs9273370   | $4.5 \times 10^{-34}$ | -17366 | 0.757 | rs1071630   | HLA-DQA1 | F41S   |
| 1p13.2   | 114377568 | rs2476601   | $2.1 \times 10^{-31}$ | 0      | 1.000 | rs2476601   | PTPN22   | R620W  |
| 12q24.12 | 111910219 | rs10774625  | $1.4 \times 10^{-26}$ | -25611 | 0.934 | rs3184504   | SH2B3    | W262R  |
| 8q24.22  | 133894854 | rs121912648 | $7.3 \times 10^{-9}$  | 0      | 1.000 | rs121912648 | TG       | R296*  |

## Nearby Expression QTLs

no eQTLs were found

# Nearby Clinical Variants

| source  | region  | our.name    | our.pval              | dist | rsqr  | assay.name  | gene   | phenotype                    | accession            |
|---------|---------|-------------|-----------------------|------|-------|-------------|--------|------------------------------|----------------------|
| clinvar | 1p13.2  | rs2476601   | $2.1 \times 10^{-31}$ | 0    | 1.000 | rs2476601   | PTPN22 | Diabetes mellitus type 1     | SNOMED<br>CT46635009 |
| clinvar | 1p13.2  | rs2476601   | $2.1 \times 10^{-31}$ | 0    | 1.000 | rs2476601   | PTPN22 | Rheumatoid arthritis         | SNOMED<br>CT69896004 |
| clinvar | 1p13.2  | rs2476601   | $2.1 \times 10^{-31}$ | 0    | 1.000 | rs2476601   | PTPN22 | Systemic lupus erythematosus | SNOMED<br>CT55464009 |
| clinvar | 8q24.22 | rs121912648 | $7.3 \times 10^{-9}$  | 0    | 1.000 | rs121912648 | TG     | Iodotyrosyl coupling defect  | SNOMED<br>CT23536000 |
| clinvar | 8q24.22 | rs121912648 | $7.3 \times 10^{-9}$  | 0    | 1.000 | rs121912648 | TG     | Autoimmune thyroid disease 3 | NCBI curation        |

# Regional Association Plots

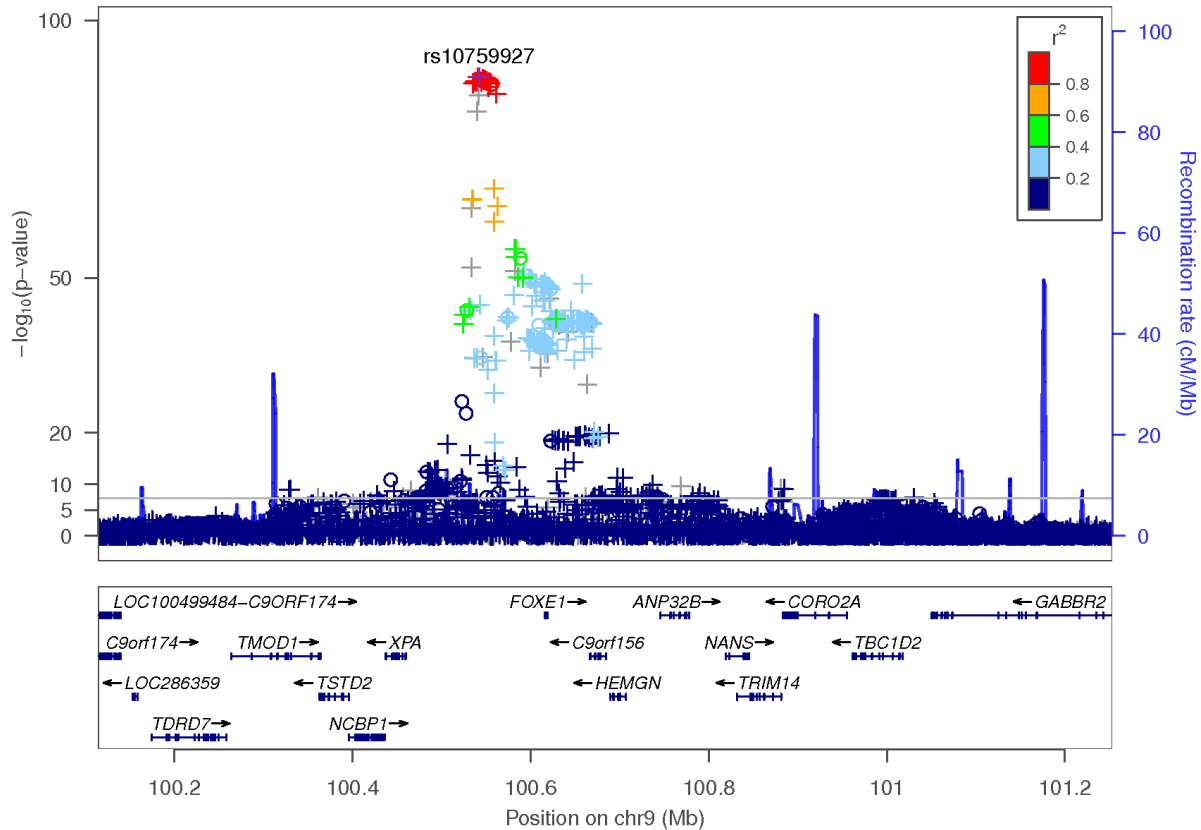



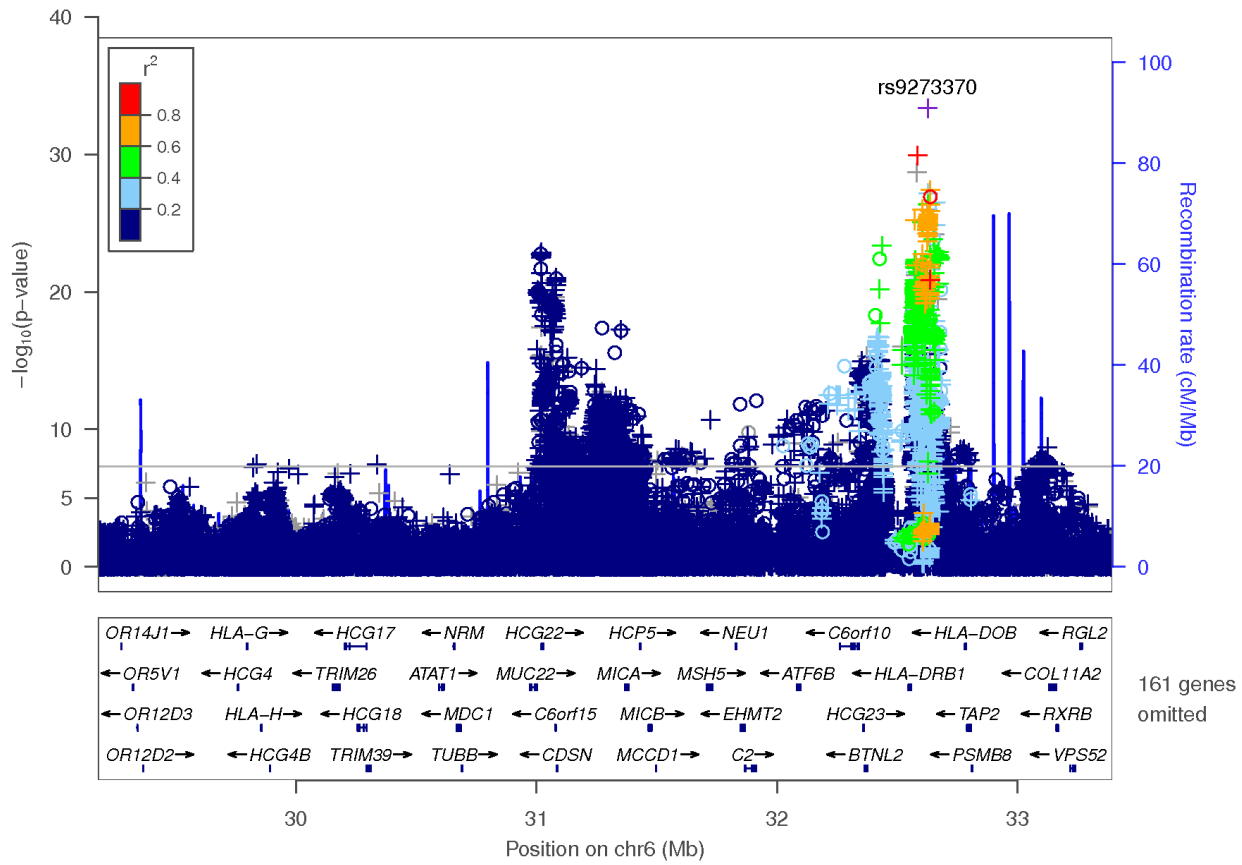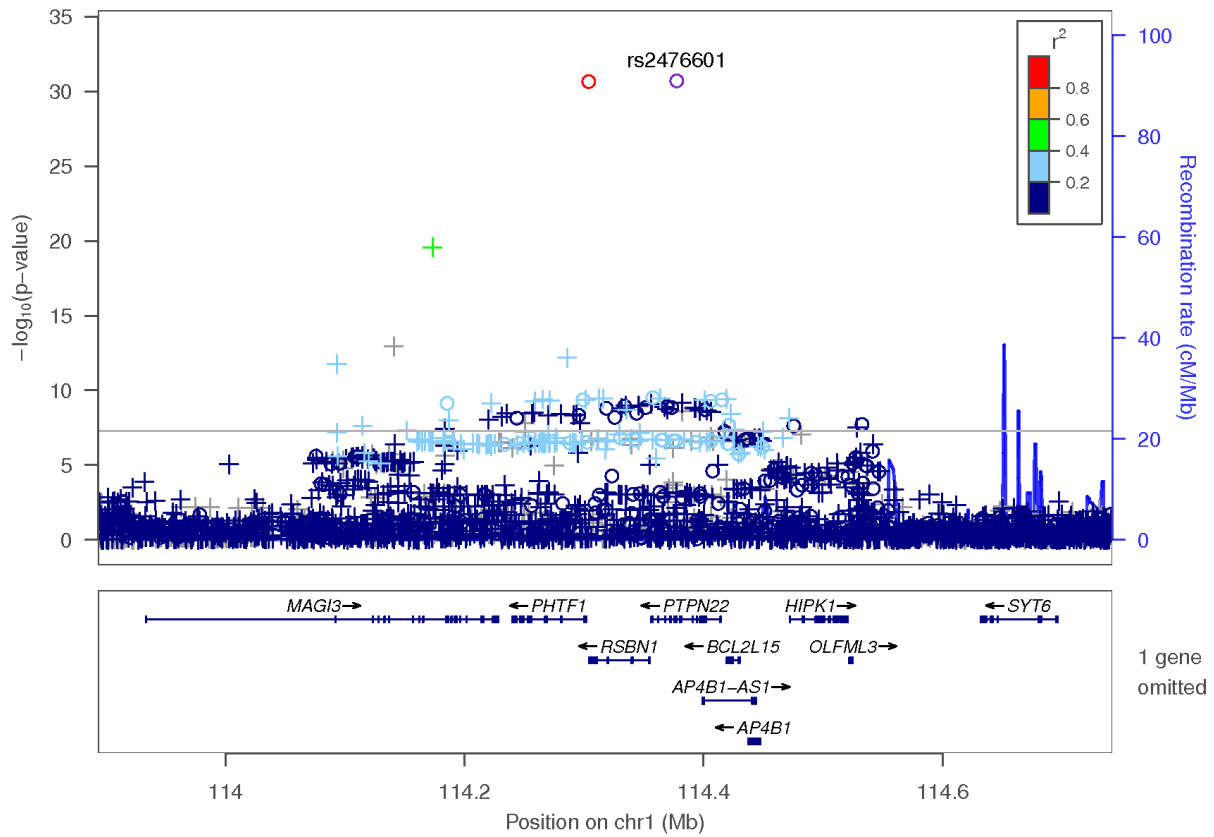

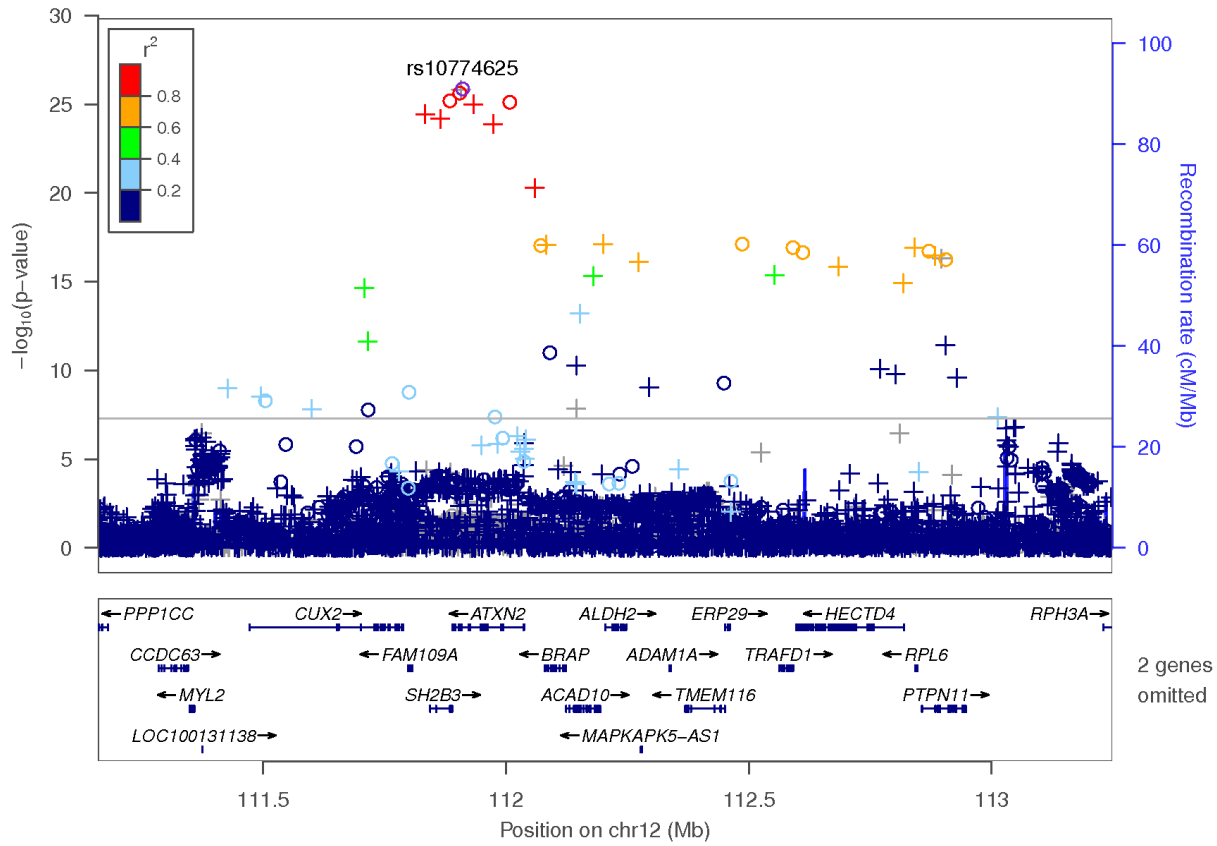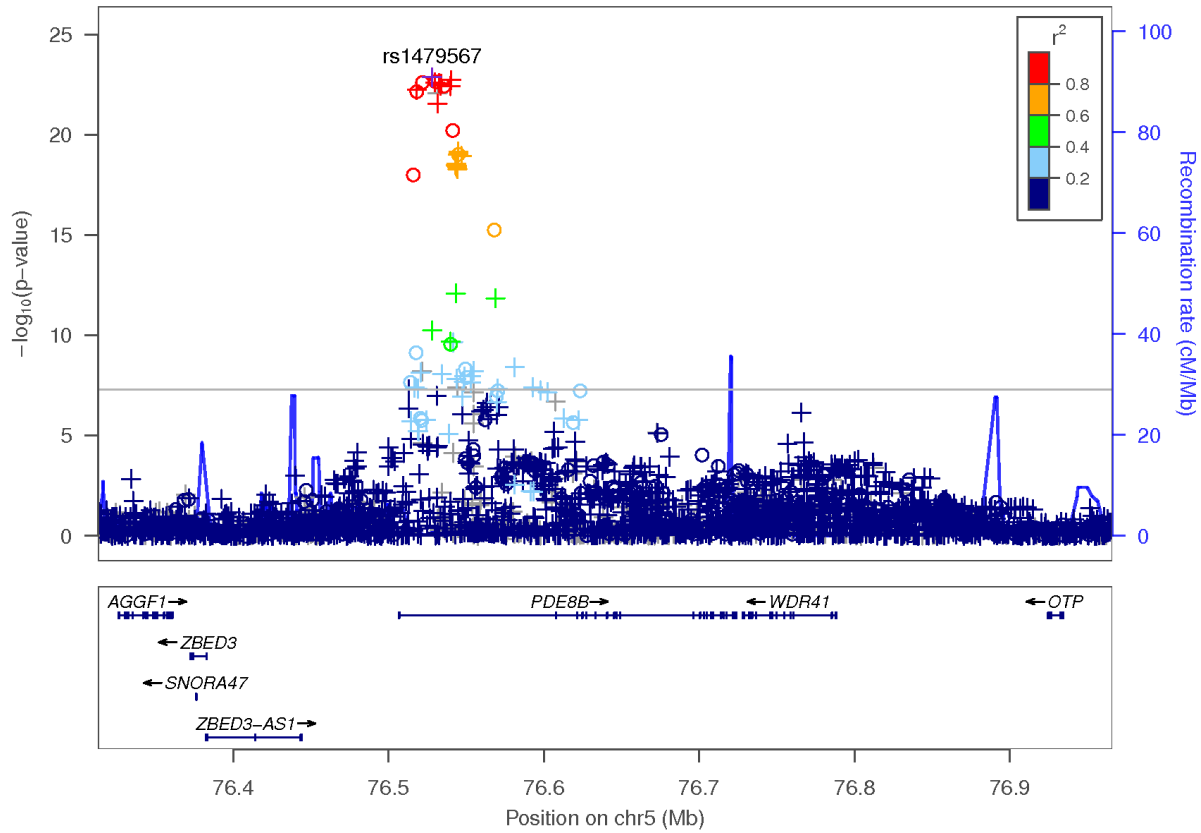

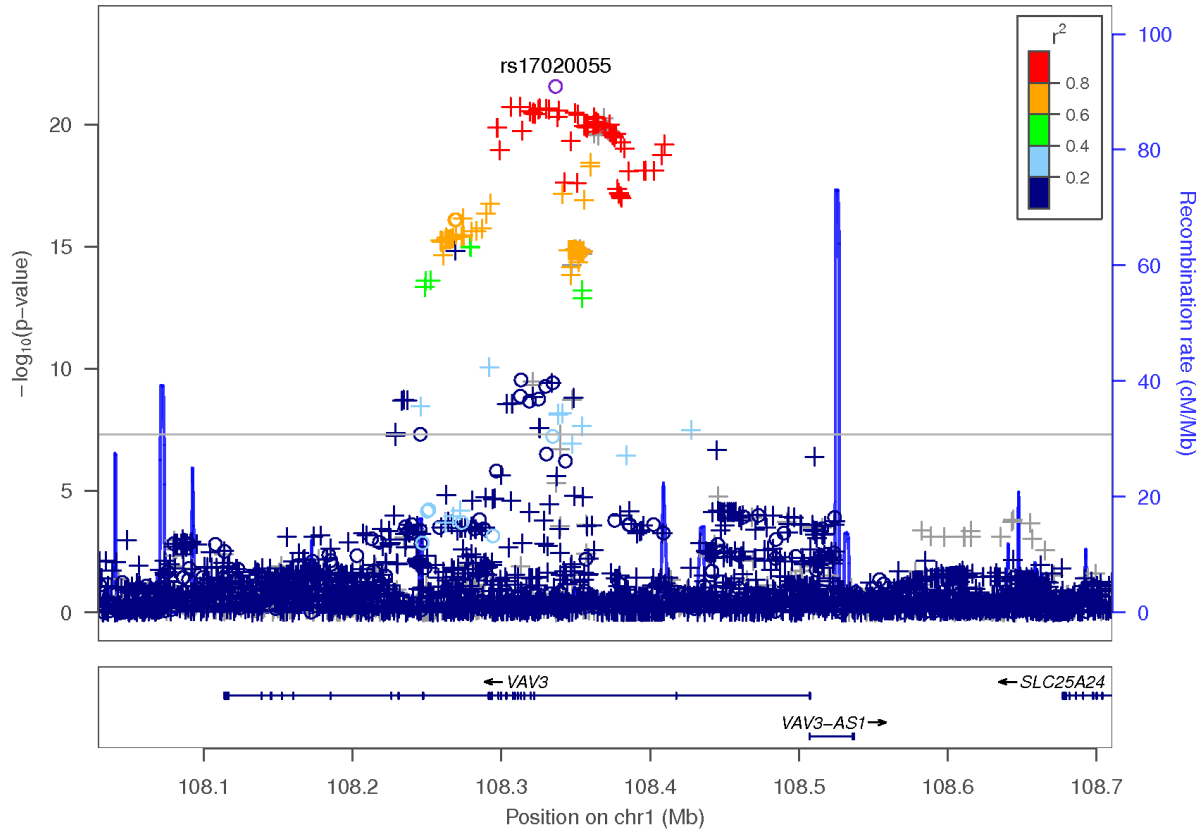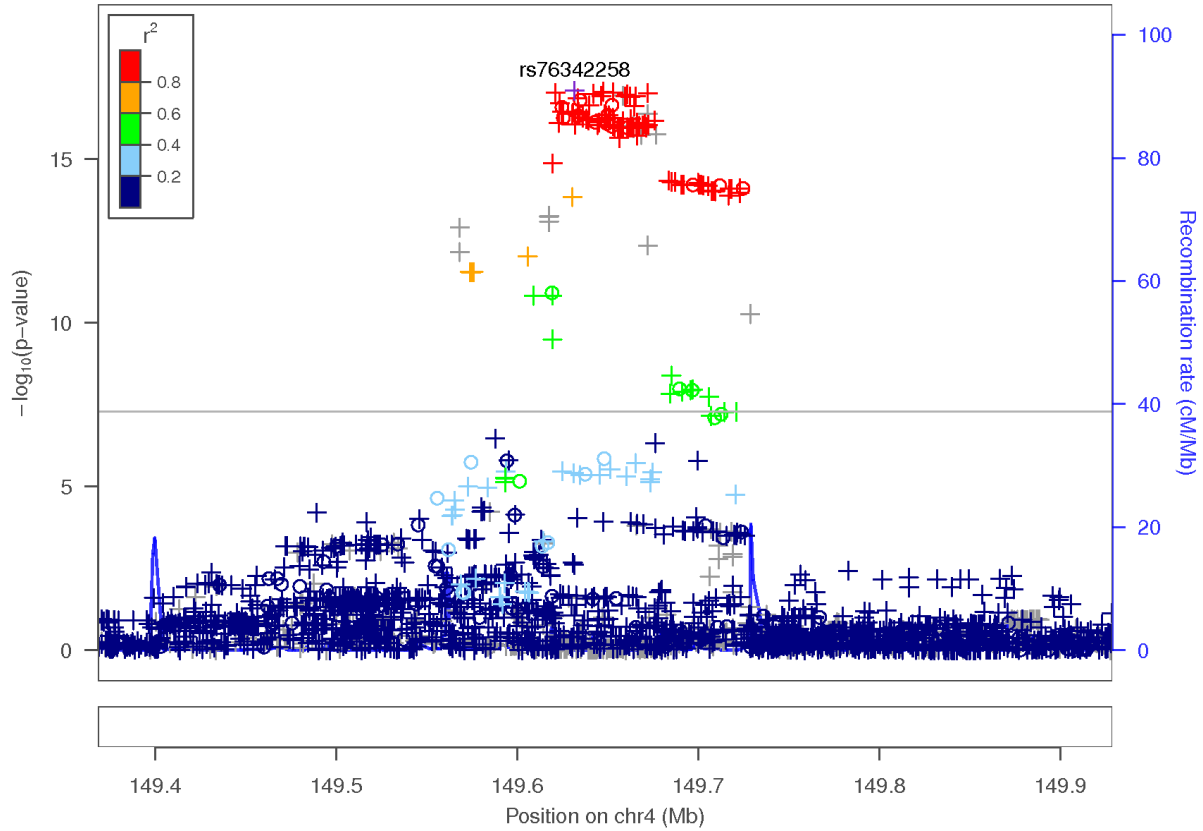

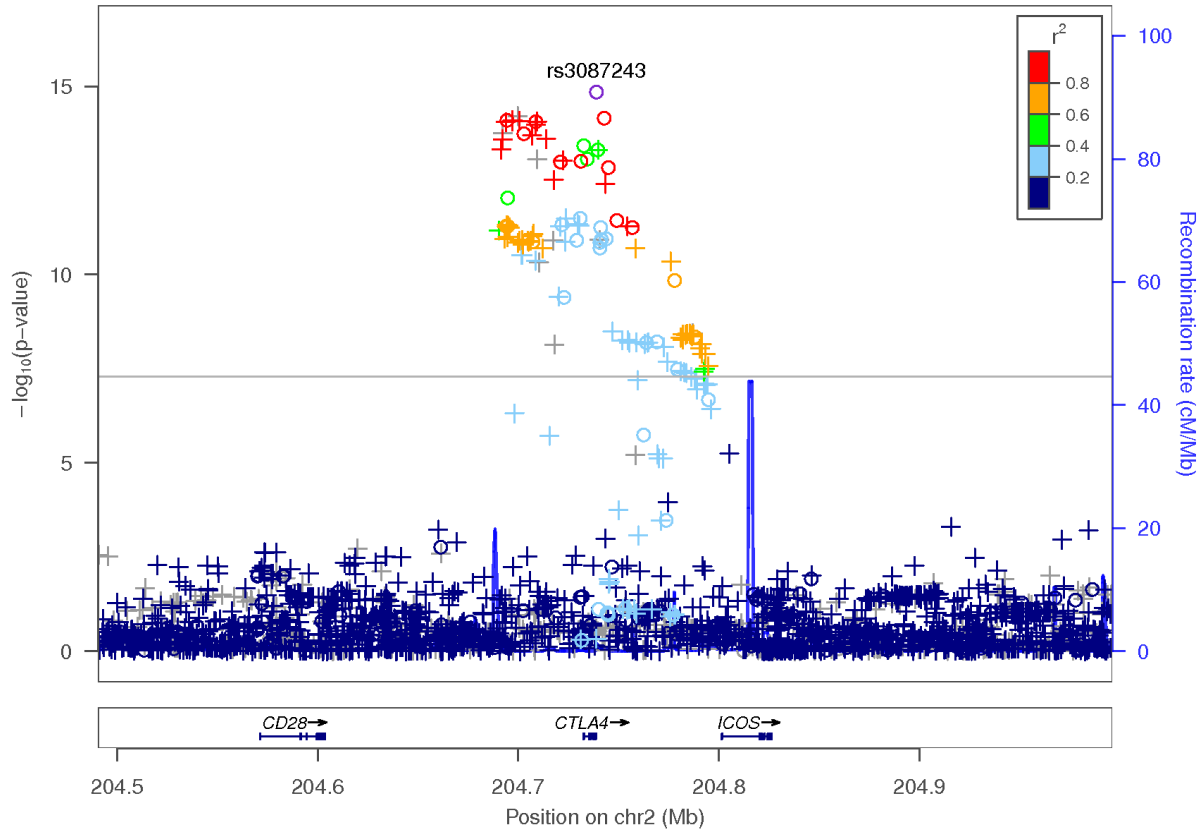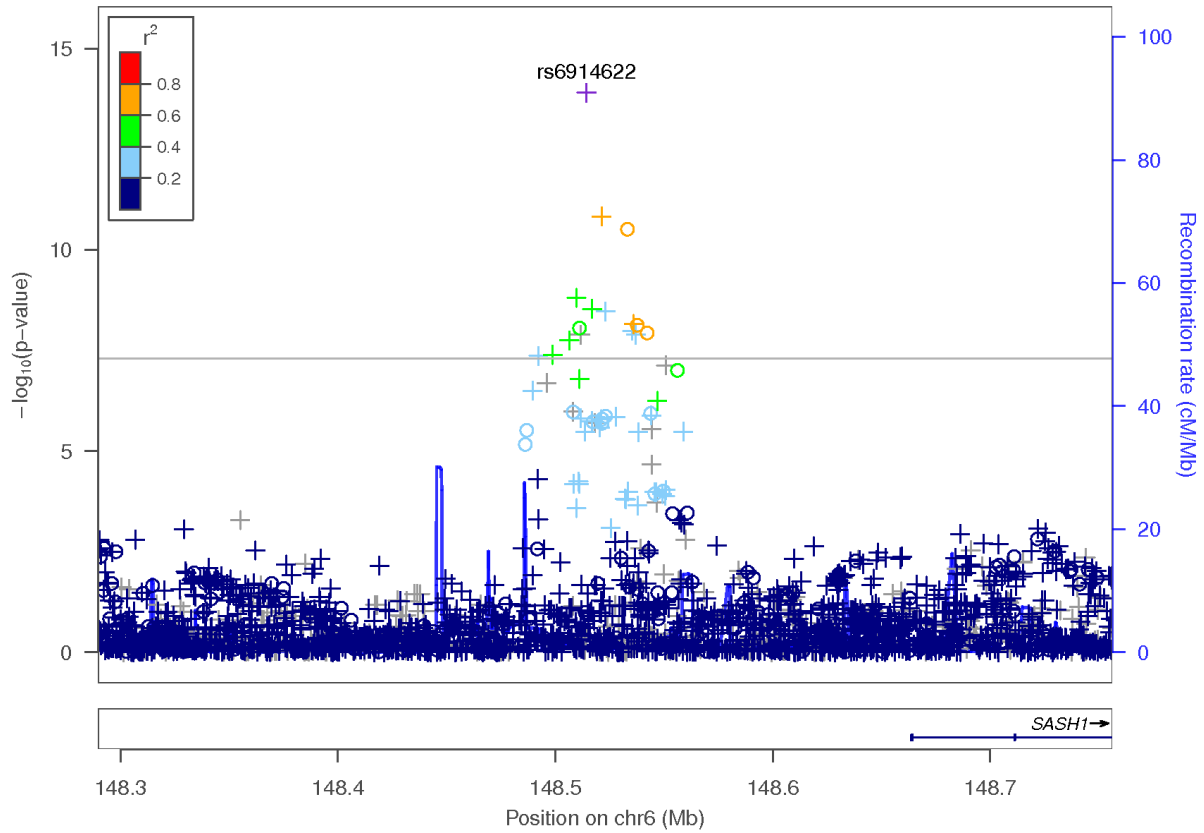

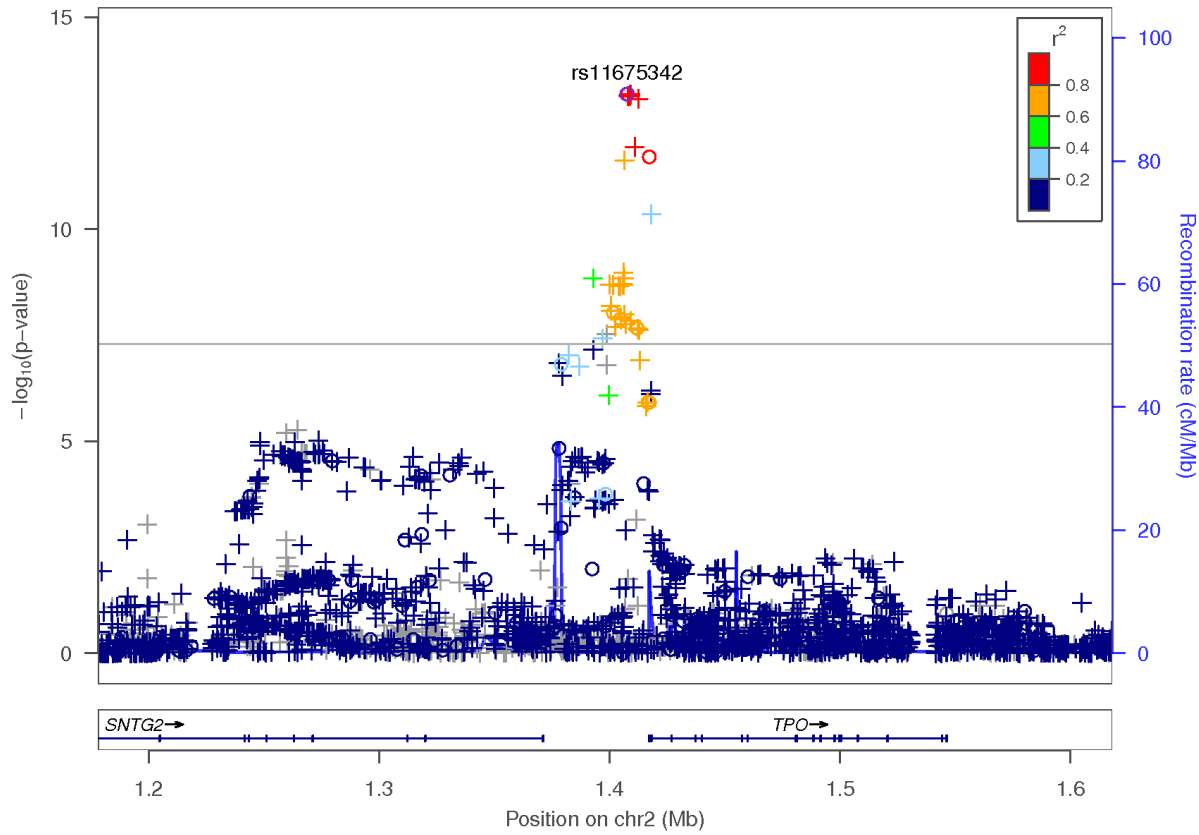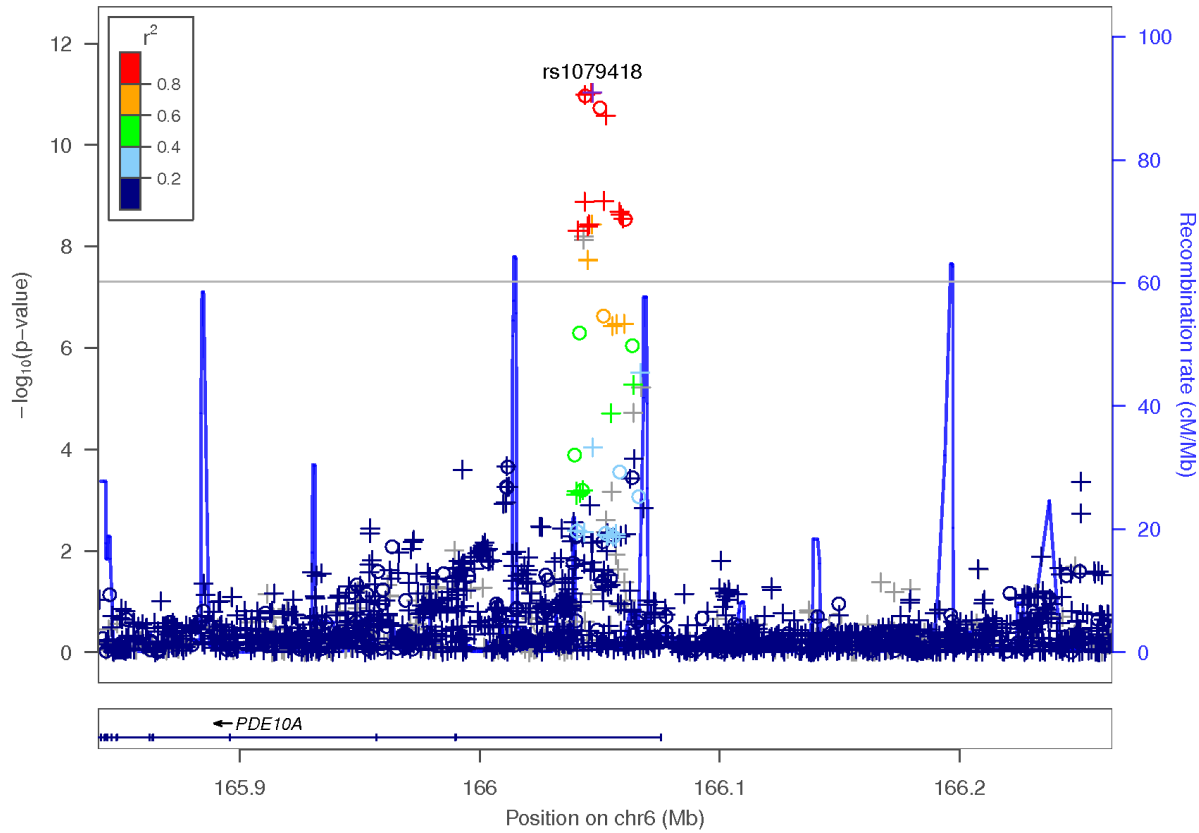

locuszoom plot for 22:37583733:C\_CG failed

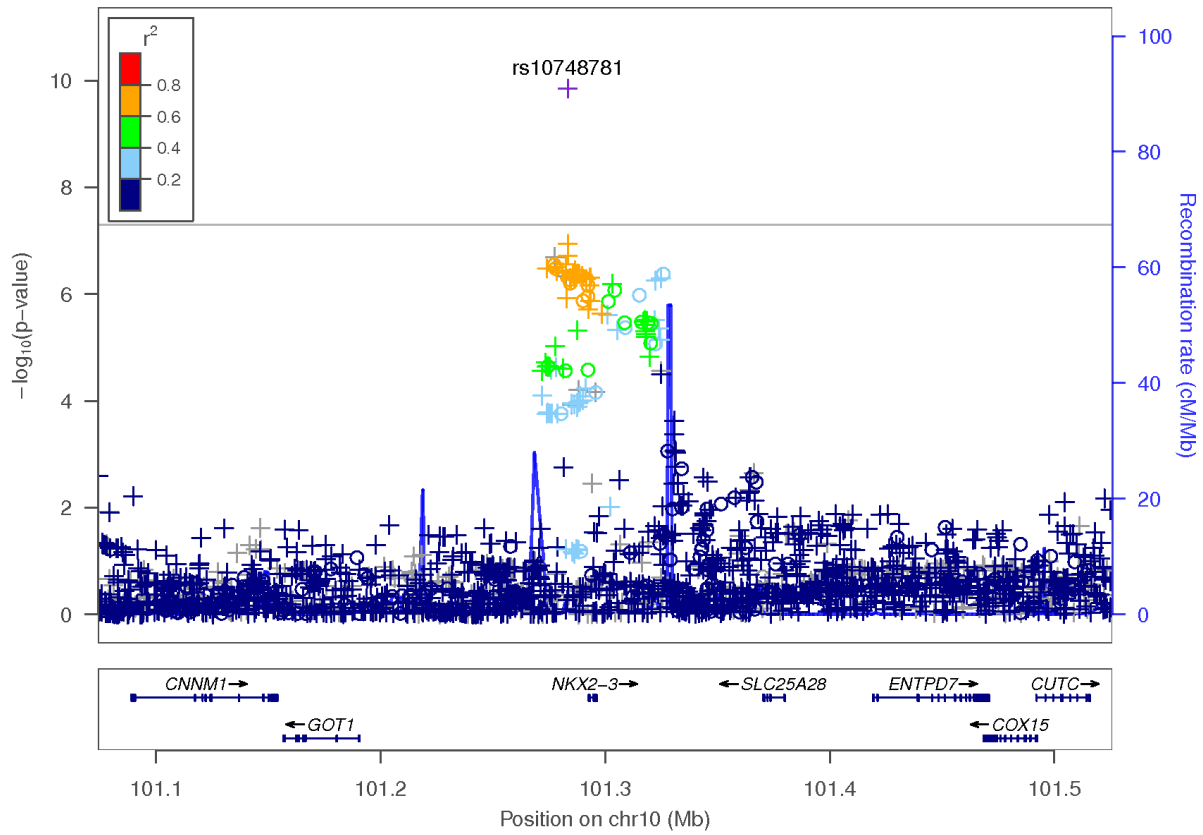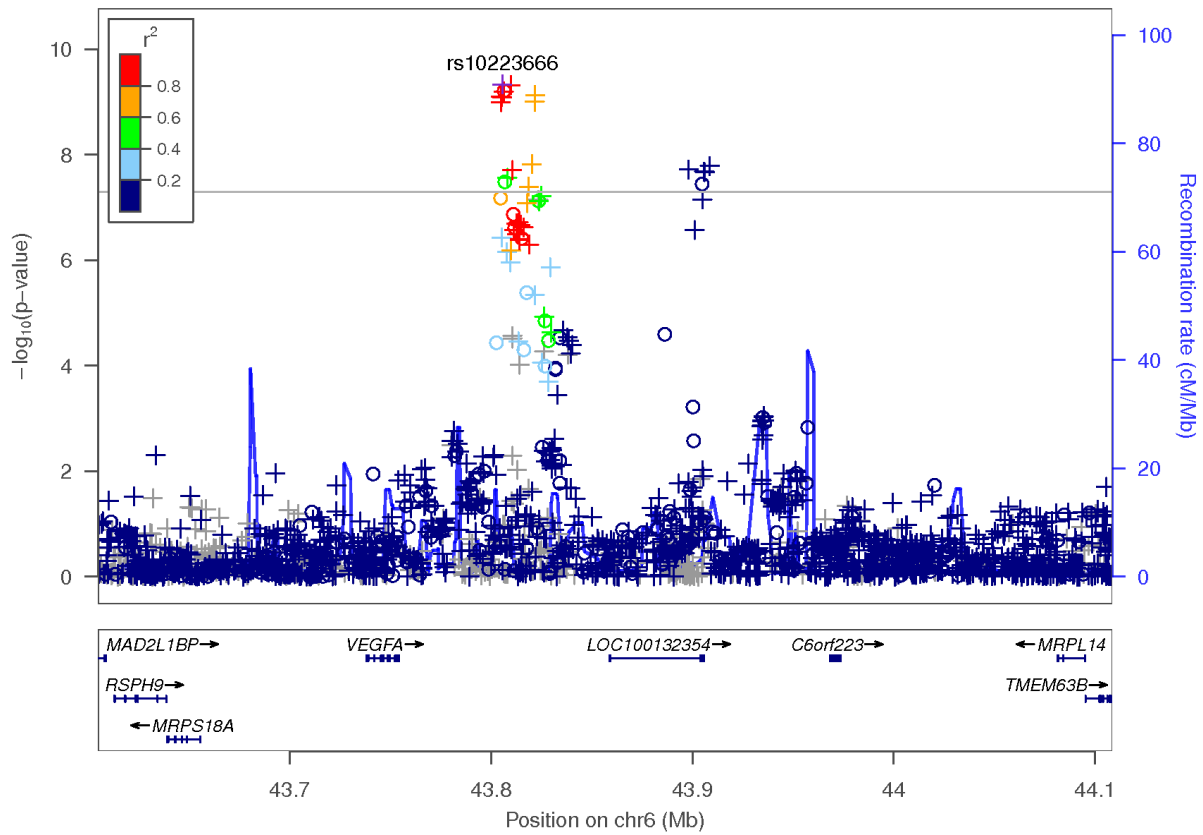

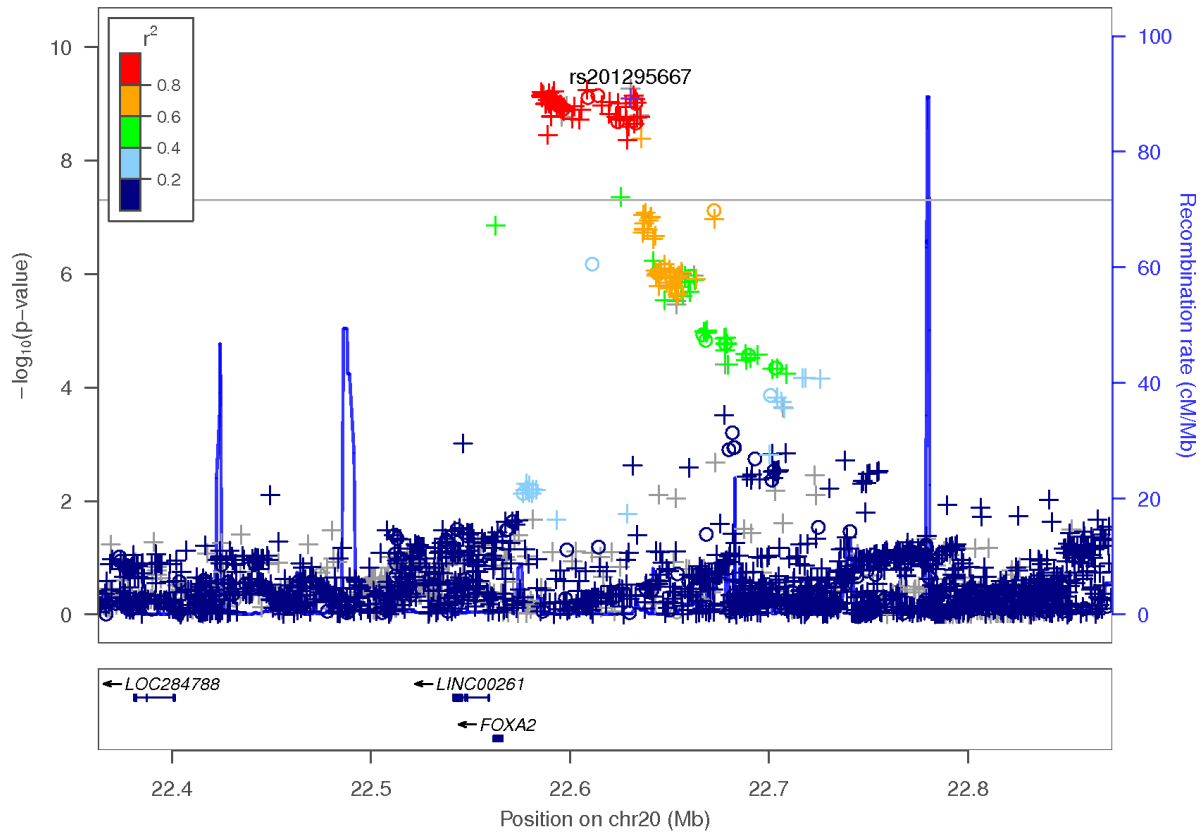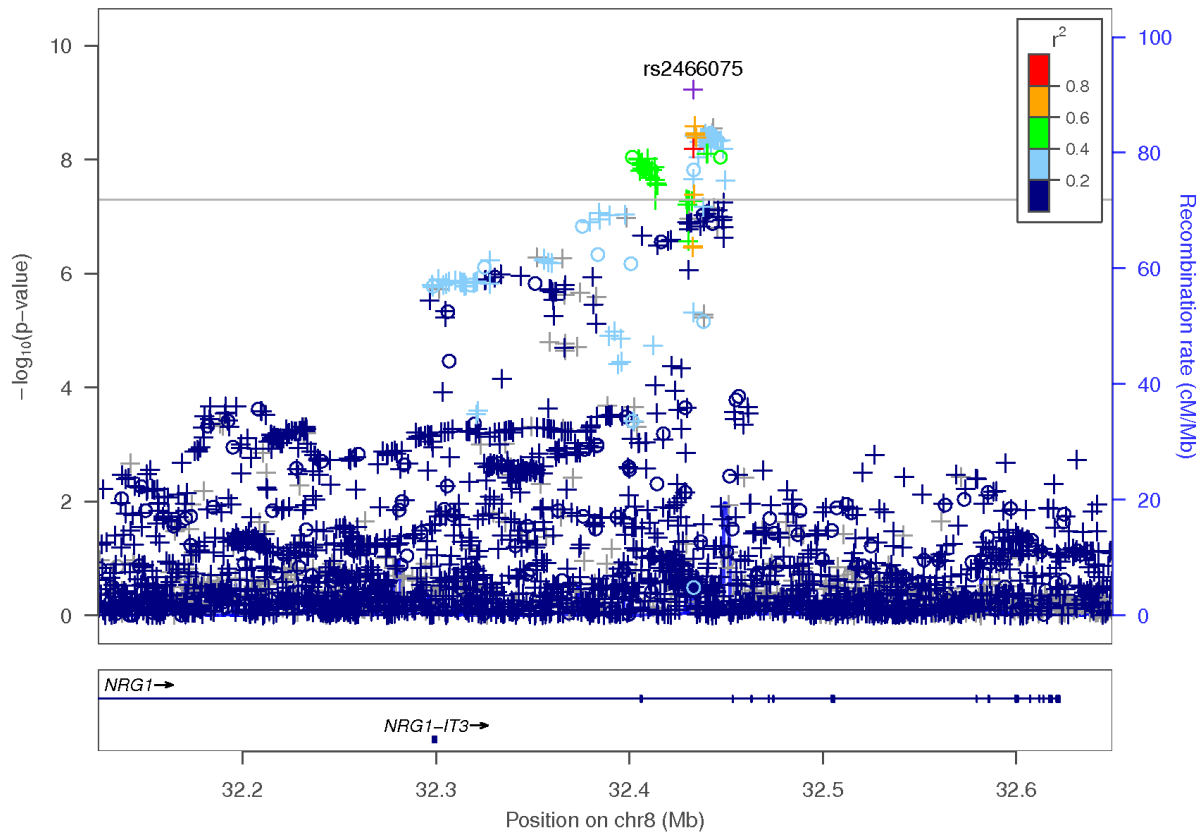

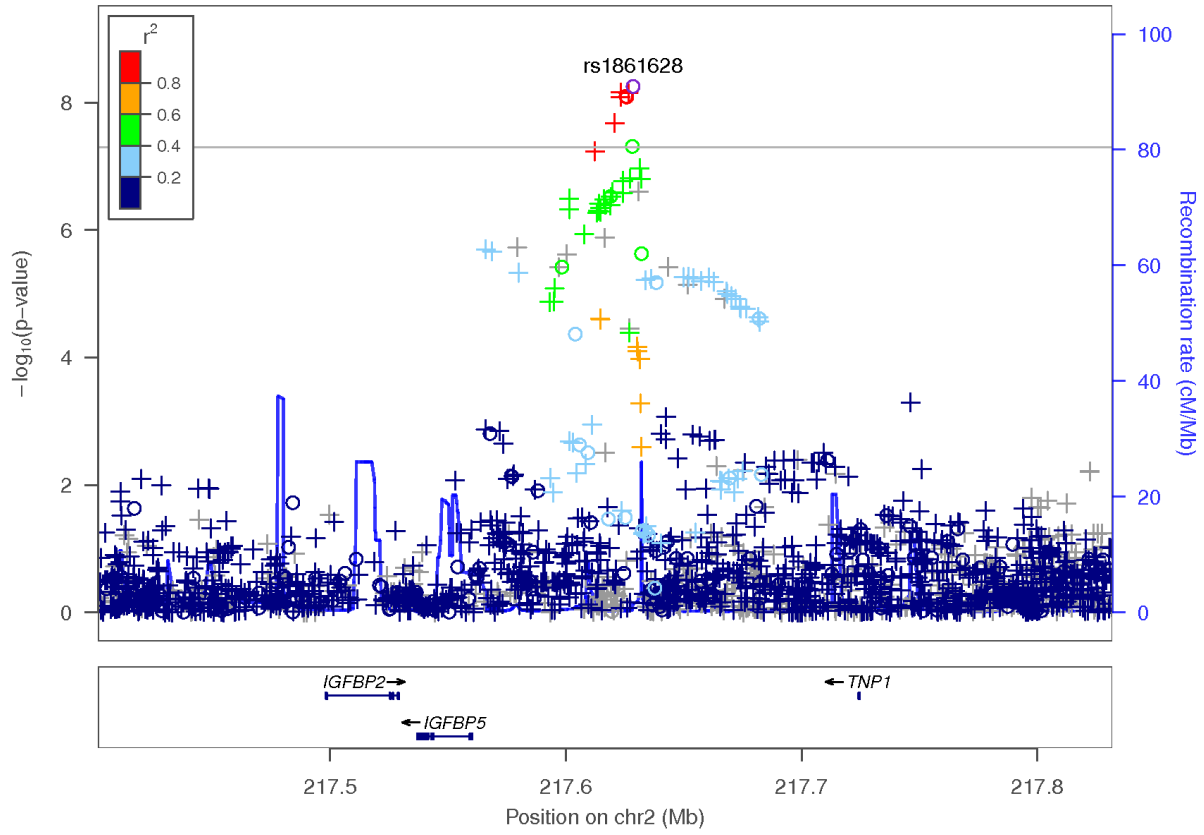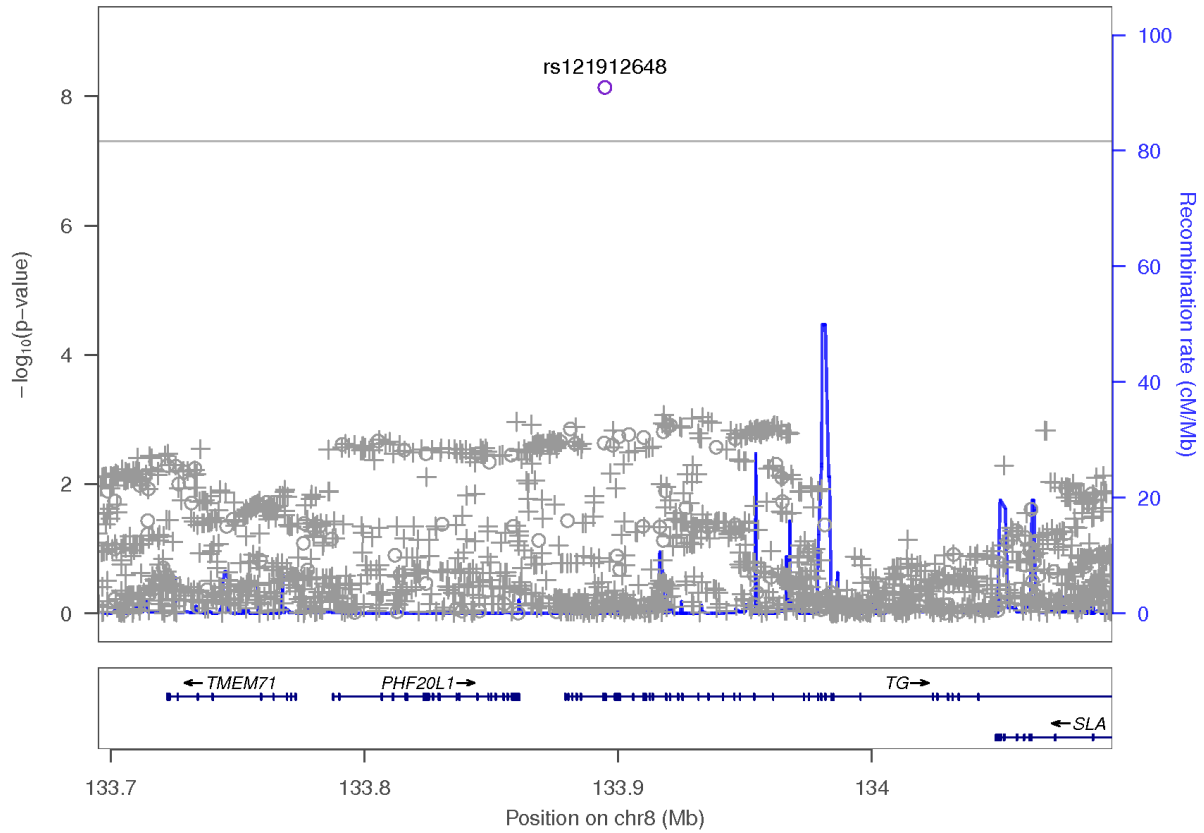



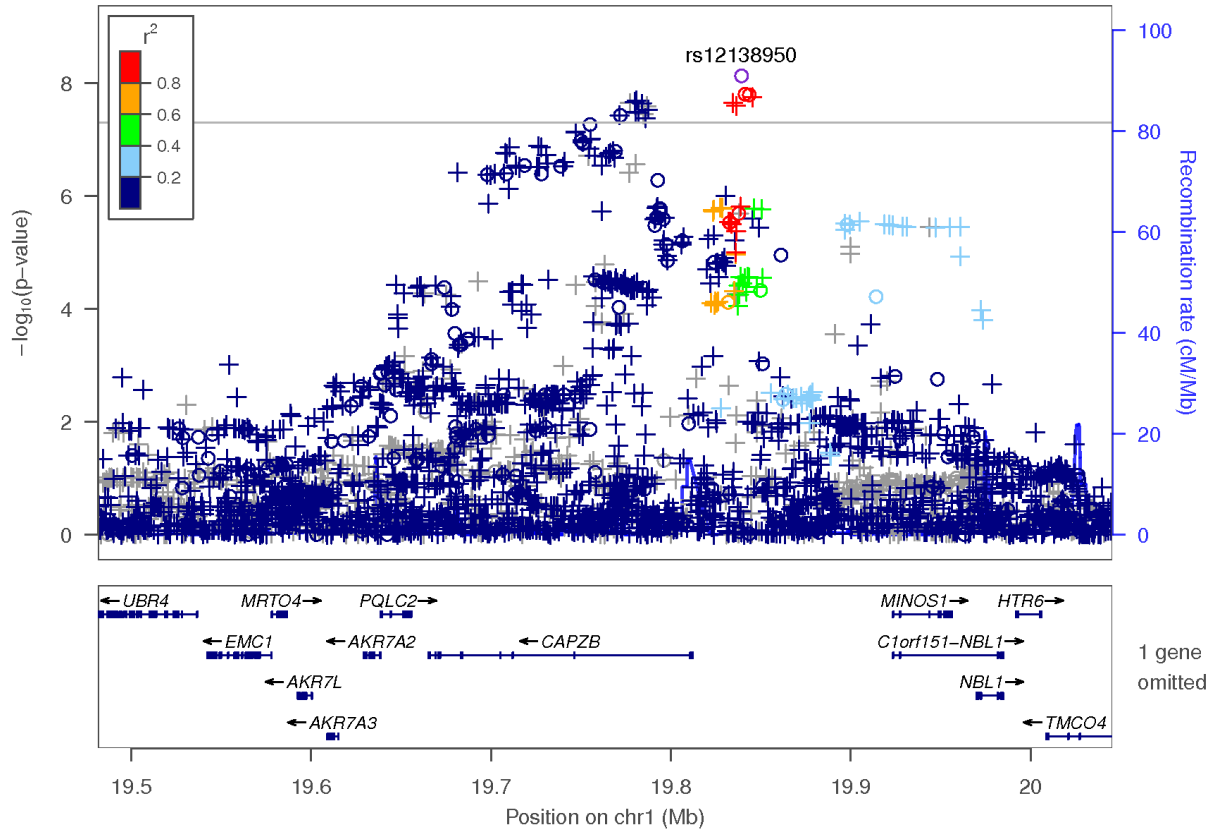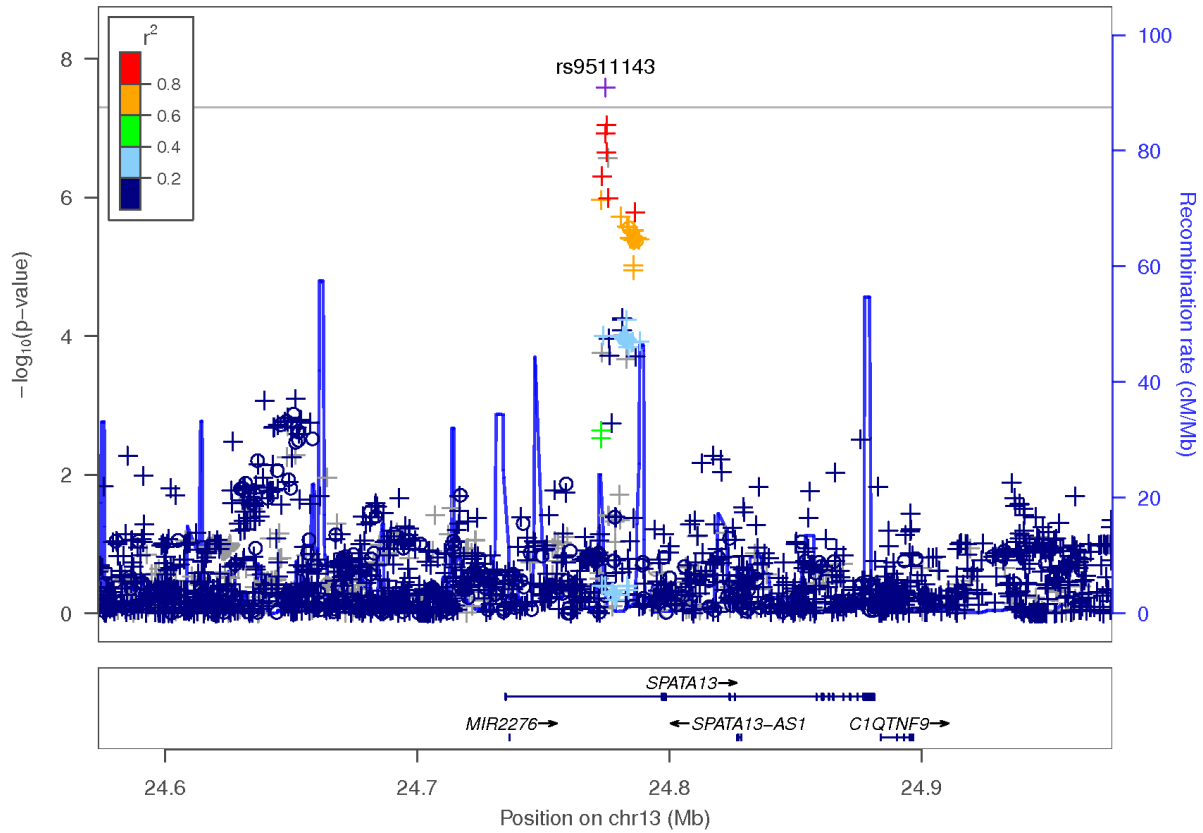

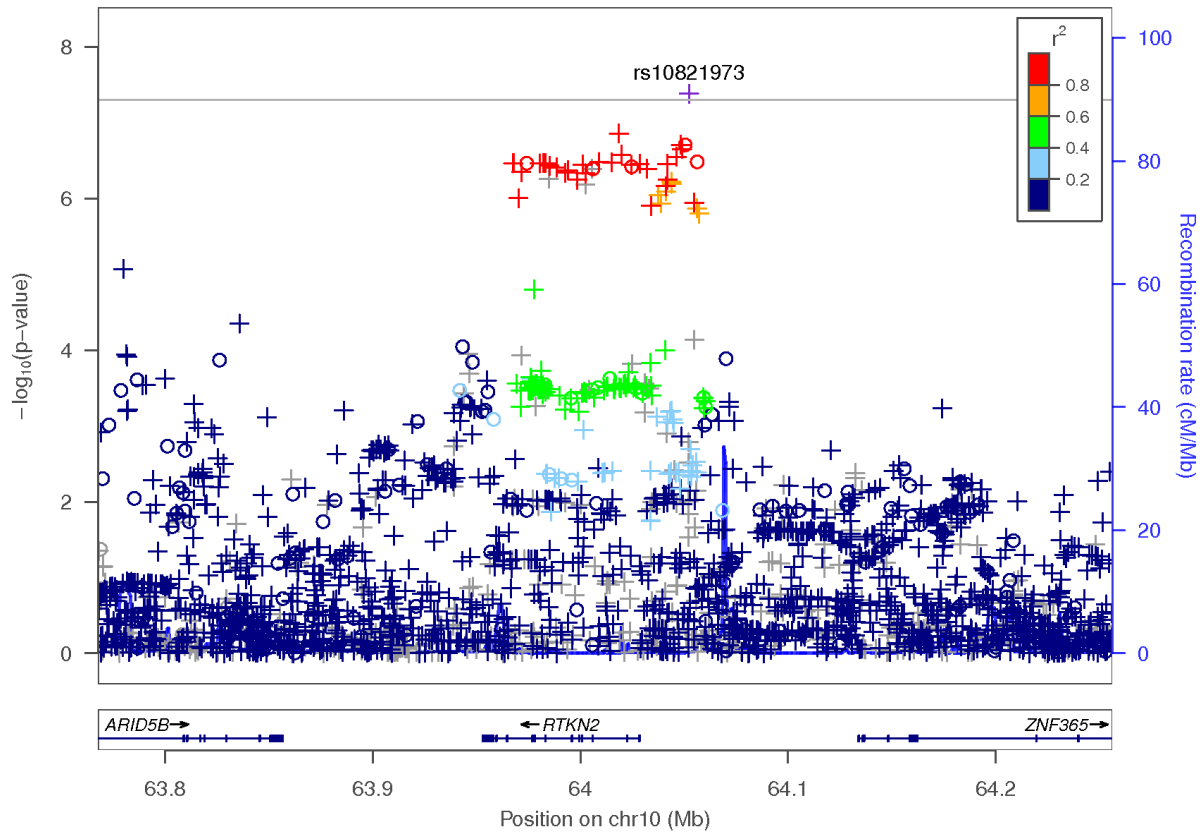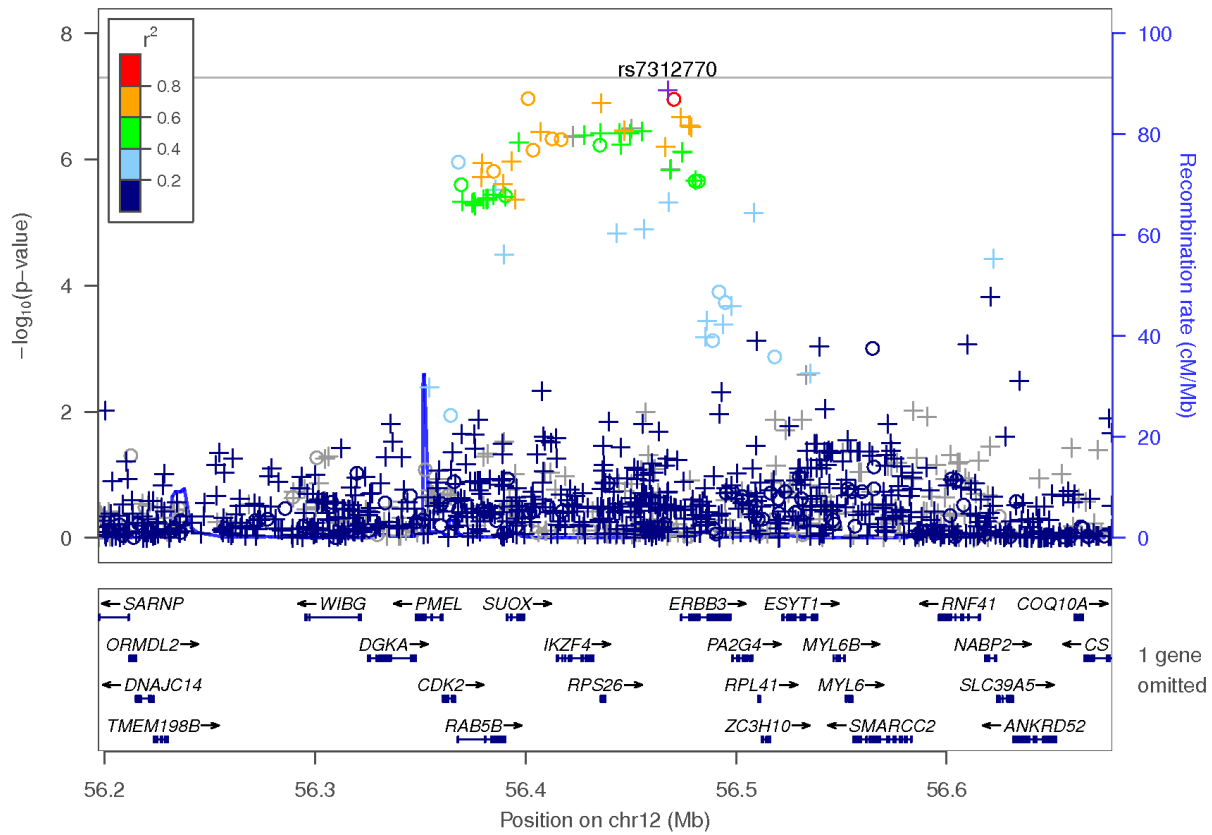

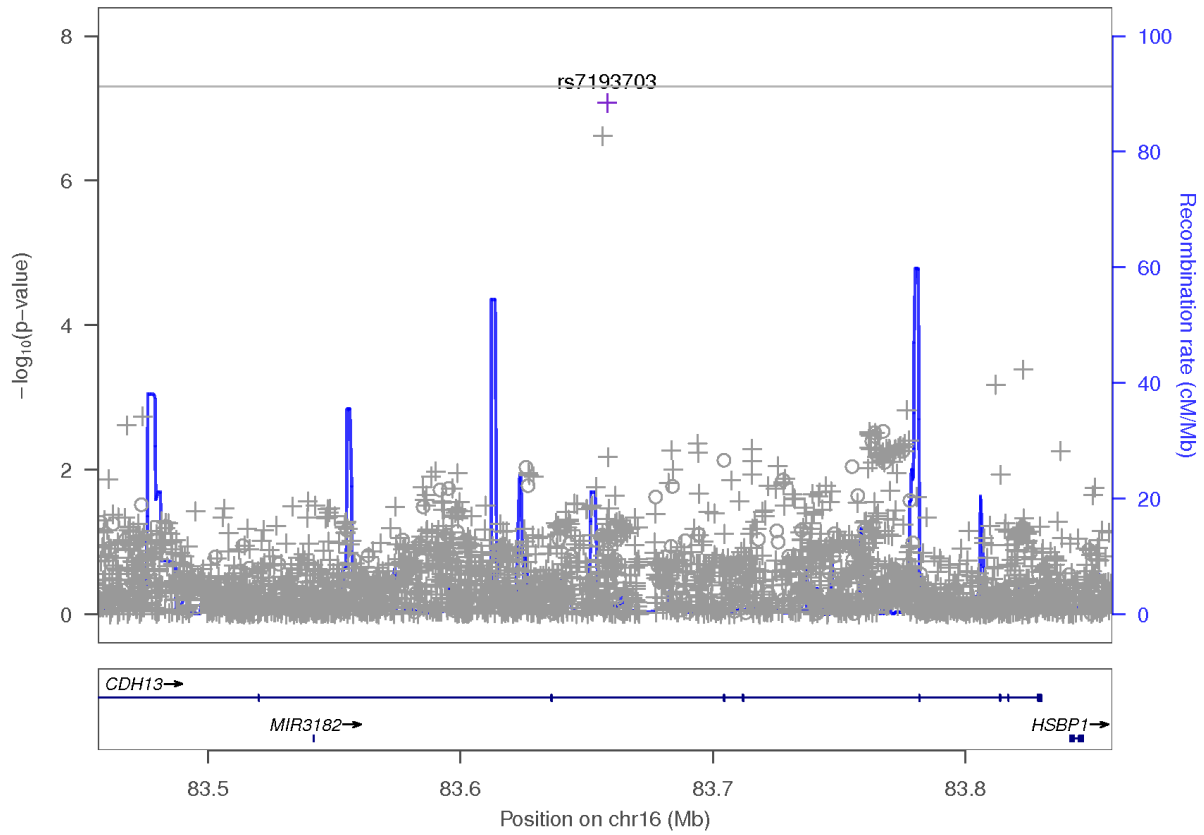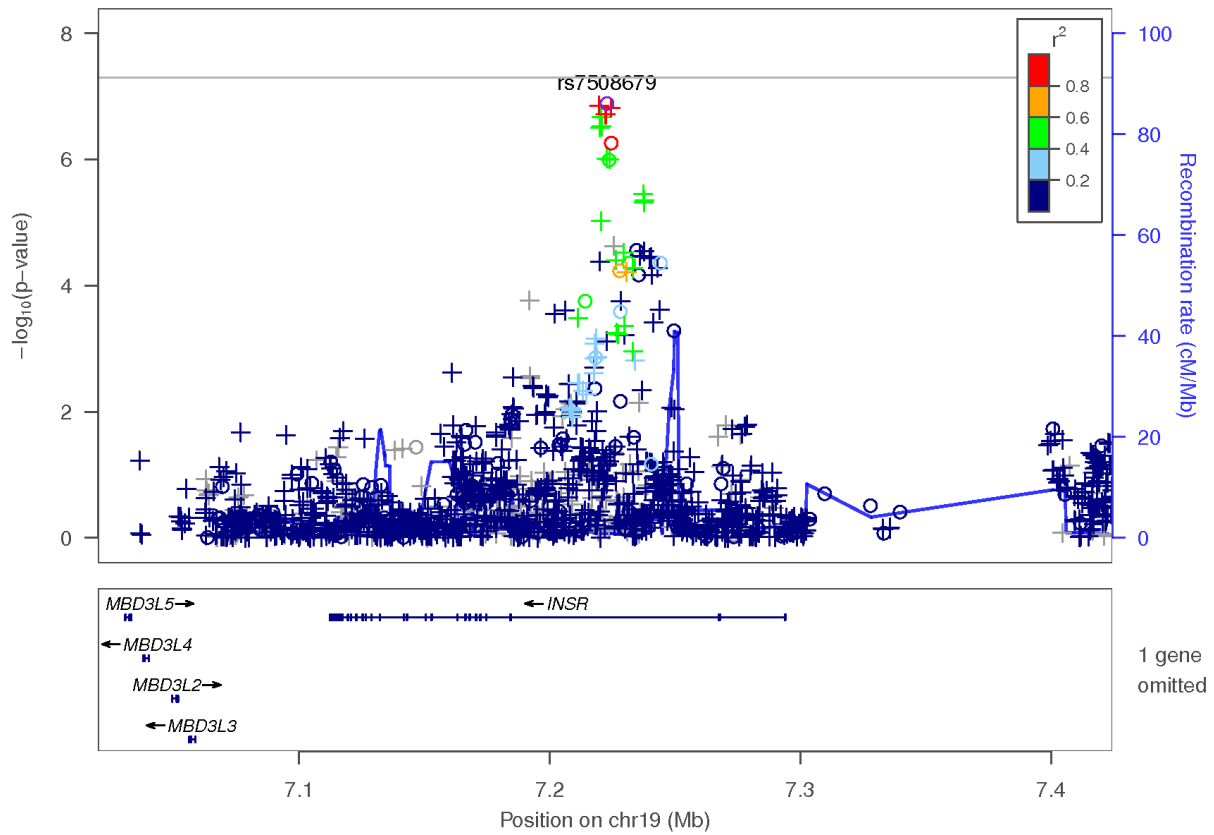

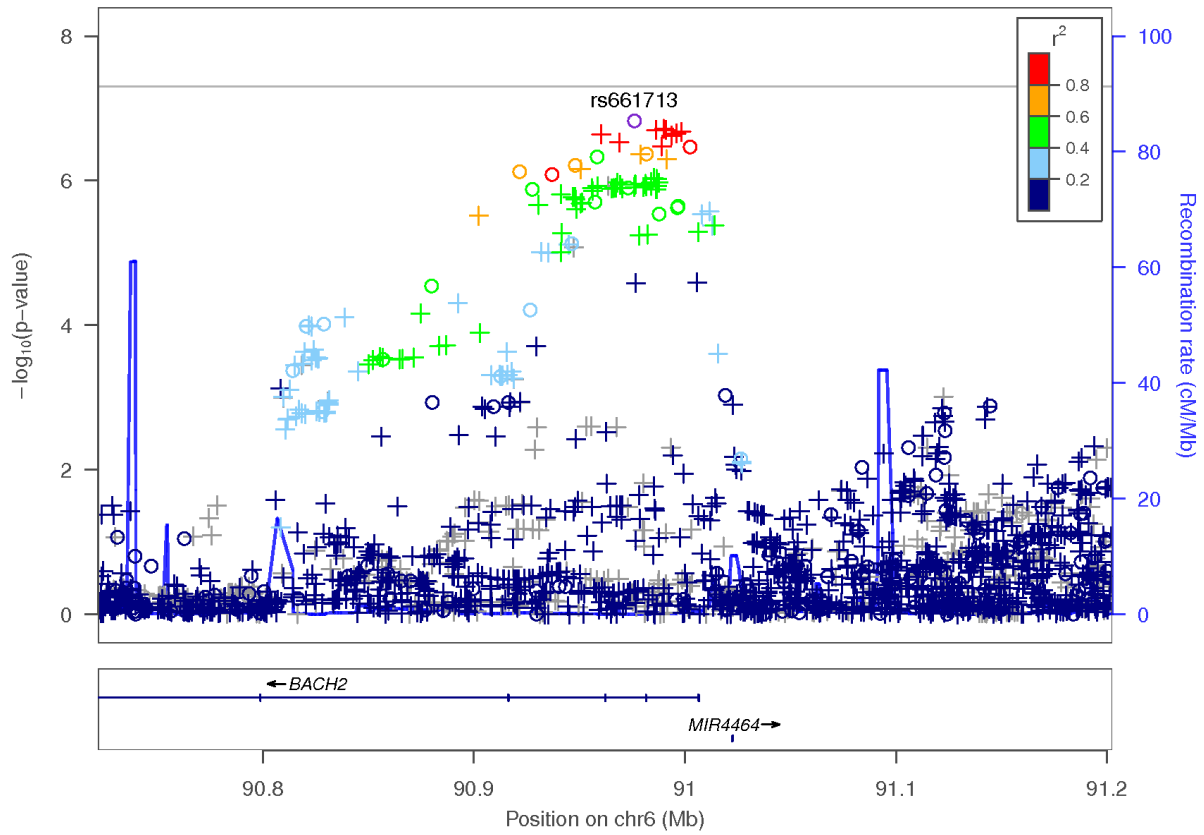

Supplement: NIHMS780506-supplement-10.pdf [file NIHMS780506-supplement-10.pdf]
