# Supplementary material
Source: PubMed Central journal article supplement (PMC5207801)

# Analysis Summary: Male Pattern Baldness

## Phenotype Description

The male pattern baldness phenotype was defined for use in a recent meta-analysis (Li *et al.*, *PLoS Genet* 8: e1002746, 2012). All subjects are male, and participants provided responses to the "Hair Loss in Men and Women" survey.

- "Please choose the image that best captures your hair's pattern and density. If your head is shaved, please answer for how your hair looks when grown out. If none of these images are similar to your hair's pattern and density, choose none of the above." (images a to s, corresponding to Hamilton scale)
- "Have you experienced hair loss or thinning?" (Yes, No, I'm not sure, Decline to state)
- "How old were you when you first started to notice hair loss?" (under 18, 18-24, 25-29, 30-34, 35-39, 40-44, 45-49, 50-54, 55-59, 60-64, 65-69, 70-74, 75-79, 80 or older, I'm not sure)

Cases reported having experienced hair loss or thinning, with onset before age 40, and current hair loss of Hamilton grade III or higher. Controls are at least 30 years old, and report not having experienced hair loss or thinning, and at most Hamilton grade I, or if age 50 or older, Hamilton grade II.

## Phenotype Statistics

The following table shows demographics of unrelated, European individuals included in the GWAS.

| Phenotype         | Group   | Total | M    | F | (0,30] | (30,45] | (45,60] | (60,Inf] |
|-------------------|---------|-------|------|---|--------|---------|---------|----------|
| male_pattern_meta | case    | 9009  | 9009 | 0 | 317    | 2677    | 3064    | 2951     |
|                   | control | 8491  | 8491 | 0 | 283    | 3476    | 2717    | 2015     |

The following table shows the phenotypic distribution across 23andMe genotyping platforms for individuals included in the GWAS.

| Phenotype         | Group   | Total | v1/v2 | v3   | v4  |
|-------------------|---------|-------|-------|------|-----|
| male_pattern_meta | case    | 9009  | 1752  | 6685 | 572 |
|                   | control | 8491  | 1770  | 6250 | 471 |

## Null Model with Covariates

The following table shows results of fitting a model for the trait based on just the covariates. Principal coordinates have been standardized, so these effect sizes are in units of standard deviations.

|      | Estimate | Std. Error | z value | Pr(> z )              | LRT   | Pr(>Chi)              |
|------|----------|------------|---------|-----------------------|-------|-----------------------|
| age  | 0.01999  | 0.00113    | 17.8    | $1.4 \times 10^{-70}$ | 322.2 | $4.7 \times 10^{-72}$ |
| pc.0 | -0.09092 | 0.01551    | -5.9    | $4.6 \times 10^{-9}$  | 34.8  | $3.7 \times 10^{-9}$  |
| pc.1 | -0.00984 | 0.01545    | -0.6    | 0.52                  | 0.4   | 0.52                  |
| pc.2 | 0.00853  | 0.01543    | 0.6     | 0.58                  | 0.3   | 0.58                  |
| pc.3 | -0.00627 | 0.01540    | -0.4    | 0.68                  | 0.2   | 0.68                  |
| pc.4 | 0.03646  | 0.01557    | 2.3     | 0.019                 | 5.5   | 0.019                 |

## SNP-level QC information

The following table shows results for QC filters on the genotyped data:

|                         | failed | passed  |
|-------------------------|--------|---------|
| no filters              | 0      | 1030430 |
| not V1-only, chrM, chrY | 4790   | 1025640 |
| parent-offspring test   | 2129   | 1023511 |
| MAF > 0%                | 3203   | 1020494 |
| HWE > 1e-20             | 48225  | 972832  |
| gt.rate > 90%           | 30775  | 952826  |
| batch effects           | 28267  | 945446  |

The following table shows results for QC filters on the imputed dosage data:

|            | failed | passed   |
|------------|--------|----------|
| no filters | 0      | 13733809 |
| MAF > 0%   | 0      | 13733809 |

imputation quality      0 13733809  
 batch effects            2168 13731641

The following table shows results for QC filters on the merged association test results:

|                    | passed   | total    |
|--------------------|----------|----------|
| imputed only       | 12833621 | 12833621 |
| both passed        | 898002   | 13731623 |
| genotyped only     | 47444    | 13779067 |
| no test result     | -34089   | 13744978 |
| failed to converge | -308337  | 13436641 |

## Genetic Association Tests

We performed logistic regression assuming an additive model for allelic effects, using the model:

*male\_pattern\_meta* ~ age + pc.0 + pc.1 + pc.2 + pc.3 + pc.4 + genotype

This genome-wide association analysis includes data from 9009 cases and 8491 controls of European ancestry, filtered to remove close relatives.

The results in this report have been adjusted for a genomic control inflation factor  $\lambda=1.065$ . The equivalent inflation factor for 1000 cases and 1000 controls  $\lambda_{1000} = 1.007$ , and for 10000,  $\lambda_{10000} = 1.074$ .

## Manhattan Plot

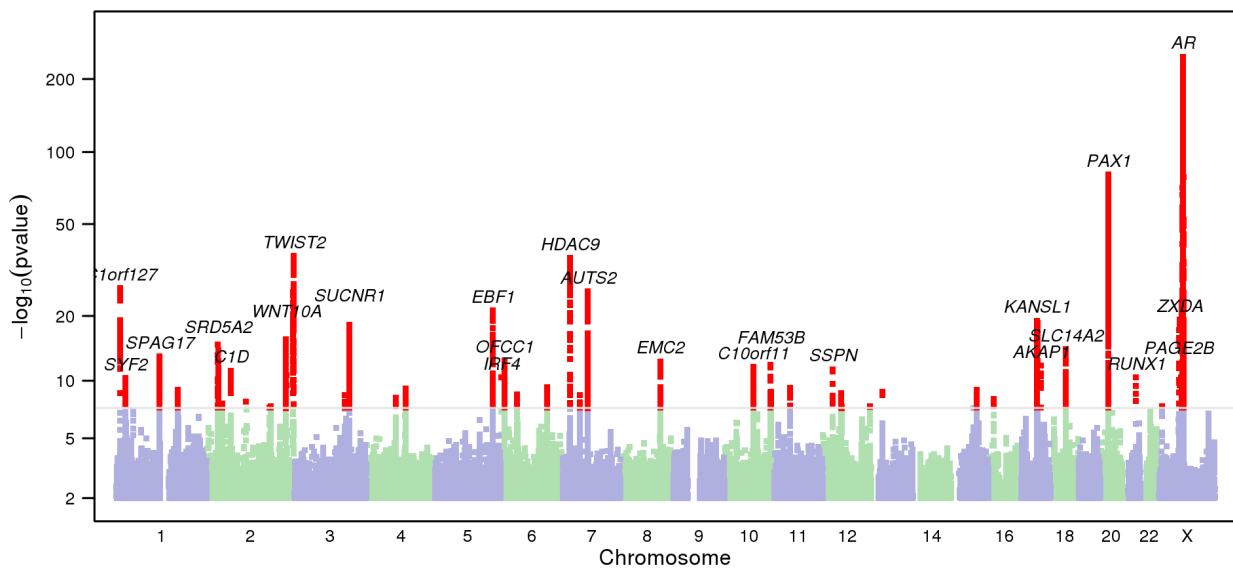

## Q-Q Plot of GWAS Results

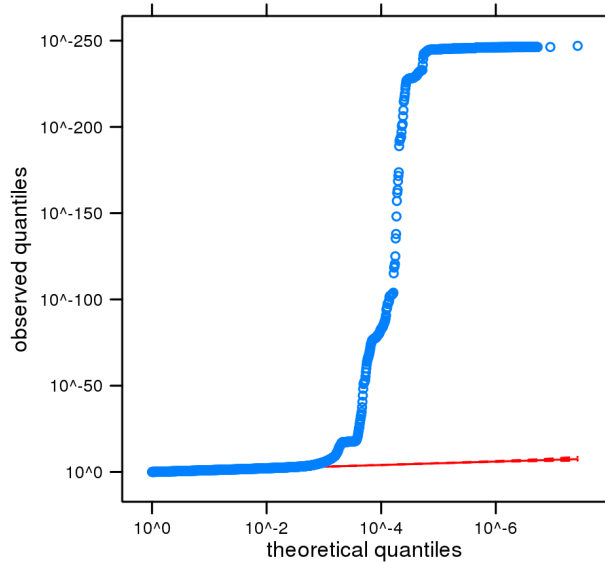

## Index SNPs for Strongest Associations

| cytoband | assay.name  | scaffold | position  | alleles | src | pvalue                 | OR    | 95% CI        | gene.context         |
|----------|-------------|----------|-----------|---------|-----|------------------------|-------|---------------|----------------------|
| Xq12     | rs200644307 | chrX     | 66300914  | D/I     | I   | $1.0 \times 10^{-247}$ | 2.277 | [2.160,2.400] | EDA2R---[---AR       |
| 20p11.22 | rs2015163   | chr20    | 22000281  | C/T     | I   | $2.7 \times 10^{-81}$  | 1.547 | [1.479,1.619] | PAX1---[---FOXA2     |
| 2q37.3   | rs11684254  | chr2     | 239695893 | C/G     | I   | $2.3 \times 10^{-37}$  | 1.350 | [1.289,1.414] | ASB1---[---TWIST2    |
| 7p21.1   | rs7801037   | chr7     | 18897511  | A/C     | I   | $1.3 \times 10^{-36}$  | 0.750 | [0.717,0.785] | [HDAC9]              |
| 1p36.22  | rs2095921   | chr1     | 11033322  | C/G     | I   | $3.1 \times 10^{-27}$  | 0.744 | [0.705,0.785] | [C1orf127]           |
| 7q11.22  | rs34991987  | chr7     | 68595226  | D/I     | I   | $2.3 \times 10^{-26}$  | 1.269 | [1.214,1.326] | [---AUTS2            |
| 5q33.3   | rs62385385  | chr5     | 158367249 | A/T     | I   | $7.4 \times 10^{-22}$  | 1.247 | [1.192,1.304] | [EBF1]               |
| Xp11.21  | rs111763724 | chrX     | 58002334  | A/G     | I   | $5.6 \times 10^{-20}$  | 0.597 | [0.532,0.670] | ZXDA--[              |
| 17q21.31 | rs201408539 | chr17    | 44166078  | D/I     | I   | $8.4 \times 10^{-20}$  | 1.338 | [1.257,1.425] | [KANSL1]             |
| 3q25.1   | rs4679956   | chr3     | 151654862 | C/T     | I   | $5.3 \times 10^{-19}$  | 1.223 | [1.170,1.279] | SUCNR1--[---MBNL1    |
| Xp11.21  | rs143149578 | chrX     | 55950016  | C/T     | I   | $6.0 \times 10^{-18}$  | 0.584 | [0.514,0.664] | RRAGB---[---KLF8     |
| 2q35     | rs74333950  | chr2     | 219746292 | G/T     | I   | $2.2 \times 10^{-16}$  | 0.764 | [0.716,0.815] | [WNT10A]             |
| 2p23.1   | rs9282858   | chr2     | 31805826  | C/T     | I   | $1.5 \times 10^{-15}$  | 0.601 | [0.529,0.682] | [SRD5A2]             |
| 18q12.3  | rs34800162  | chr18    | 42808059  | G/T     | I   | $8.2 \times 10^{-15}$  | 1.217 | [1.158,1.278] | [SLC14A2]            |
| 1p12     | rs12083887  | chr1     | 118881689 | A/G     | I   | $9.1 \times 10^{-14}$  | 0.843 | [0.806,0.882] | SPAG17---[---TBX15   |
| 6p24.3   | rs9357047   | chr6     | 9327556   | C/T     | I   | $3.0 \times 10^{-13}$  | 0.847 | [0.811,0.886] | SLC35B3---[---OFCC1  |
| 8q23.1   | rs79437808  | chr8     | 109597801 | C/T     | I   | $4.1 \times 10^{-13}$  | 2.153 | [1.738,2.668] | EMC2--[---TMEM74     |
| Xp11.21  | rs185597083 | chrX     | 55133845  | A/C     | I   | $7.5 \times 10^{-13}$  | 1.388 | [1.267,1.520] | PAGE2B--[---FAM104B  |
| 10q26.13 | rs3781458   | chr10    | 126343931 | C/T     | I   | $1.2 \times 10^{-12}$  | 0.849 | [0.812,0.889] | [FAM53B]             |
| 17q22    | rs62060349  | chr17    | 55231168  | C/T     | I   | $1.5 \times 10^{-12}$  | 0.853 | [0.816,0.891] | AKAP1--[---MSI2      |
| 10q22.3  | rs11593840  | chr10    | 78196612  | A/G     | I   | $2.2 \times 10^{-12}$  | 0.852 | [0.815,0.891] | [C10orf11]           |
| 12p12.1  | rs9300169   | chr12    | 26426671  | A/G     | I   | $4.4 \times 10^{-12}$  | 0.839 | [0.798,0.882] | SSPN--[---ITPR2      |
| 2p14     | rs6546334   | chr2     | 68078849  | C/T     | I   | $6.4 \times 10^{-12}$  | 0.851 | [0.813,0.891] | ETAA1---[---C1D      |
| 6p25.3   | rs12203592  | chr6     | 396321    | C/T     | I   | $4.0 \times 10^{-11}$  | 1.220 | [1.150,1.294] | [IRF4]               |
| 21q22.12 | rs68088846  | chr21    | 36208167  | A/G     | I   | $4.4 \times 10^{-11}$  | 0.828 | [0.783,0.876] | [RUNX1]              |
| 1p36.11  | rs7534070   | chr1     | 25498175  | G/T     | I   | $5.3 \times 10^{-11}$  | 0.832 | [0.787,0.879] | RUNX3---[---SYF2     |
| 6q22.32  | rs1262557   | chr6     | 127054588 | C/T     | I   | $4.8 \times 10^{-10}$  | 1.150 | [1.100,1.202] | CENPW---[---RSPO3    |
| 11p11.2  | rs11037975  | chr11    | 44410862  | C/G     | I   | $6.3 \times 10^{-10}$  | 0.854 | [0.812,0.898] | ALX4--[---CD82       |
| 4q25     | rs78311490  | chr4     | 107883049 | A/G     | I   | $6.7 \times 10^{-10}$  | 0.757 | [0.692,0.827] | [DKK2]               |
| 1q24.2   | rs78003935  | chr1     | 170341522 | A/T     | I   | $9.9 \times 10^{-10}$  | 0.861 | [0.820,0.903] | METTL11B---[---GORAB |
| 15q23    | rs7177657   | chr15    | 70041693  | C/T     | I   | $1.0 \times 10^{-9}$   | 0.793 | [0.736,0.855] | RPLP1---[---TLE3     |
| 13q12.3  | rs9314998   | chr13    | 30746969  | A/G     | I   | $1.5 \times 10^{-9}$   | 1.146 | [1.097,1.198] | UBL3---[---KATNAL1   |
| 12q13.12 | rs7974517   | chr12    | 51145082  | A/T     | I   | $2.0 \times 10^{-9}$   | 0.868 | [0.829,0.909] | DIP2B--[---ATF1      |
| 6p21.1   | rs227808    | chr6     | 44666915  | C/T     | I   | $2.9 \times 10^{-9}$   | 0.846 | [0.800,0.894] | CDC5L---[---SUPT3H   |
| 3q23     | rs7642536   | chr3     | 139032333 | C/T     | I   | $3.1 \times 10^{-9}$   | 0.807 | [0.751,0.866] | PRR23C---[---MRPS22  |
| 7p12.3   | rs12702271  | chr7     | 46943759  | C/T     | I   | $3.2 \times 10^{-9}$   | 1.171 | [1.111,1.233] | IGFBP3---[---TNS3    |
| 4q21.21  | rs4690116   | chr4     | 81206377  | A/T     | I   | $5.5 \times 10^{-9}$   | 0.876 | [0.838,0.916] | [FGF5]               |
| 16p13.12 | rs246180    | chr16    | 14391923  | A/C     | I   | $8.0 \times 10^{-9}$   | 1.152 | [1.098,1.209] | MKL2--[---PARN       |
| 2q12.3   | rs3827760   | chr2     | 109513601 | A/G     | I   | $1.3 \times 10^{-8}$   | 0.447 | [0.335,0.595] | [EDAR]               |
| 2p21     | rs11694173  | chr2     | 43590899  | A/G     | I   | $2.2 \times 10^{-8}$   | 0.852 | [0.805,0.901] | [THADA]              |
| 12q24.33 | rs76972608  | chr12    | 130563363 | A/T     | I   | $3.6 \times 10^{-8}$   | 0.834 | [0.781,0.889] | TMEM132D---[---FZD10 |
| 2q31.1   | rs1819008   | chr2     | 177697882 | C/T     | I   | $3.7 \times 10^{-8}$   | 0.884 | [0.846,0.924] | MTX2---[---HNRNPA3   |
| Xp22.31  | rs5933688   | chrX     | 8880680   | A/G     | I   | $3.7 \times 10^{-8}$   | 1.102 | [1.065,1.141] | FAM9A---[---FAM9B    |
| 2q31.1   | rs13405699  | chr2     | 174605633 | A/C     | I   | $4.7 \times 10^{-8}$   | 0.672 | [0.582,0.776] | CDCA7---[---SP3      |

## Quality Statistics for Index SNPs

| assay.name  | is.v2 | is.v3 | is.v4 | gt.rate | hw.p.value            | p.date | freq.b | avg.rsqr | min.rsqr | p.batch               | dose.b | qc.mask |
|-------------|-------|-------|-------|---------|-----------------------|--------|--------|----------|----------|-----------------------|--------|---------|
| rs200644307 | FALSE | FALSE | FALSE |         |                       |        |        | 0.9106   | 0.8966   | 3.9×10 <sup>-5</sup>  | 0.8400 | v2v3v4  |
| rs201563    | FALSE | FALSE | FALSE |         |                       |        |        | 0.9882   | 0.9596   | 0.0029                | 0.5423 | v2v3v4  |
| rs11684254  | FALSE | FALSE | FALSE |         |                       |        |        | 0.9938   | 0.9899   | 0.26                  | 0.3402 | v2v3v4  |
| rs7801037   | FALSE | FALSE | FALSE |         |                       |        |        | 0.9915   | 0.9845   | 0.033                 | 0.5851 | v2v3v4  |
| rs2095921   | FALSE | FALSE | FALSE |         |                       |        |        | 0.9525   | 0.9394   | 0.36                  | 0.2293 | v2v3v4  |
| rs34991987  | FALSE | FALSE | FALSE |         |                       |        |        | 0.9978   | 0.9890   | 0.92                  | 0.4602 | v2v3v4  |
| rs62385385  | FALSE | FALSE | FALSE |         |                       |        |        | 0.9967   | 0.9933   | 0.75                  | 0.6070 | v2v3v4  |
| rs111763724 | FALSE | FALSE | FALSE |         |                       |        |        | 0.8177   | 0.7634   | 0.00023               | 0.0256 | v2v3v4  |
| rs201408539 | FALSE | FALSE | FALSE |         |                       |        |        | 0.8363   | 0.8254   | 0.33                  | 0.8170 | v2v3v4  |
| rs4679956   | FALSE | FALSE | FALSE |         |                       |        |        | 0.9965   | 0.9863   | 0.68                  | 0.4109 | v2v3v4  |
| rs143149578 | FALSE | FALSE | FALSE |         |                       |        |        | 0.7889   | 0.7642   | 1.2×10 <sup>-5</sup>  | 0.0208 | v2v3v4  |
| rs74333950  | FALSE | FALSE | FALSE |         |                       |        |        | 0.9812   | 0.9630   | 0.037                 | 0.8628 | v2v3v4  |
| rs9282858   | FALSE | TRUE  | TRUE  | 0.9998  | 0.032                 | 0.45   | 0.0325 | 0.9735   | 0.7250   | 0.51                  | 0.0321 | v2v3v4  |
| rs34800162  | FALSE | FALSE | FALSE |         |                       |        |        | 0.9963   | 0.9946   | 0.11                  | 0.7284 | v2v3v4  |
| rs12083887  | FALSE | FALSE | FALSE |         |                       |        |        | 0.9961   | 0.9945   | 0.25                  | 0.6052 | v2v3v4  |
| rs9357047   | FALSE | FALSE | FALSE |         |                       |        |        | 0.9977   | 0.9967   | 0.15                  | 0.5787 | v2v3v4  |
| rs79437808  | FALSE | FALSE | FALSE |         |                       |        |        | 0.9273   | 0.7854   | 0.76                  | 0.0116 | v2v3v4  |
| rs185597083 | FALSE | FALSE | FALSE |         |                       |        |        | 0.7349   | 0.7007   | 5.5×10 <sup>-6</sup>  | 0.9587 | v2v3v4  |
| rs3781458   | FALSE | TRUE  | FALSE | 0.9951  | 0.00064               | 0.14   | 0.6178 | 0.9980   | 0.9906   | 0.0013                | 0.6169 | v2v3v4  |
| rs62060349  | FALSE | FALSE | FALSE |         |                       |        |        | 0.9938   | 0.9916   | 0.50                  | 0.5467 | v2v3v4  |
| rs11593840  | FALSE | FALSE | FALSE |         |                       |        |        | 0.9973   | 0.9914   | 7.2×10 <sup>-7</sup>  | 0.4148 | v2v3v4  |
| rs9300169   | FALSE | FALSE | FALSE |         |                       |        |        | 0.9952   | 0.9710   | 0.54                  | 0.7337 | v2v3v4  |
| rs6546334   | FALSE | FALSE | FALSE |         |                       |        |        | 0.9945   | 0.9873   | 0.077                 | 0.3509 | v2v3v4  |
| rs12203592  | TRUE  | TRUE  | TRUE  | 1.0000  | 9.7×10 <sup>-37</sup> | 0.014  | 0.1728 | 0.9923   | 0.9819   | 4.2×10 <sup>-6</sup>  | 0.1705 | v2v3v4  |
| rs68088846  | FALSE | FALSE | FALSE |         |                       |        |        | 0.9074   | 0.8766   | 0.18                  | 0.7914 | v2v3v4  |
| rs7534070   | FALSE | FALSE | FALSE |         |                       |        |        | 0.6340   | 0.5370   | 1.4×10 <sup>-10</sup> | 0.6458 | v2v3v4  |
| rs1262557   | FALSE | FALSE | FALSE |         |                       |        |        | 0.9888   | 0.9871   | 0.0017                | 0.4688 | v2v3v4  |
| rs11037975  | FALSE | FALSE | FALSE |         |                       |        |        | 0.9094   | 0.8896   | 0.047                 | 0.3036 | v2v3v4  |
| rs78311490  | FALSE | FALSE | FALSE |         |                       |        |        | 0.9500   | 0.8998   | 0.026                 | 0.0713 | v2v3v4  |
| rs78003935  | FALSE | FALSE | FALSE |         |                       |        |        | 0.9318   | 0.9242   | 0.0079                | 0.6752 | v2v3v4  |
| rs7177657   | FALSE | FALSE | FALSE |         |                       |        |        | 0.9933   | 0.9895   | 0.041                 | 0.9074 | v2v3v4  |
| rs9314998   | FALSE | FALSE | FALSE |         |                       |        |        | 0.9943   | 0.9930   | 0.0043                | 0.5683 | v2v3v4  |
| rs7974517   | FALSE | FALSE | FALSE |         |                       |        |        | 0.9629   | 0.9491   | 0.53                  | 0.6201 | v2v3v4  |
| rs227808    | TRUE  | TRUE  | TRUE  | 0.9974  | 0.023                 | 0.83   | 0.1963 | 0.9988   | 0.9968   | 0.72                  | 0.1956 | v2v3v4  |
| rs7642536   | FALSE | FALSE | FALSE |         |                       |        |        | 0.8209   | 0.7172   | 0.19                  | 0.8708 | v2v3v4  |
| rs12702271  | FALSE | FALSE | FALSE |         |                       |        |        | 0.9689   | 0.9527   | 0.39                  | 0.2402 | v2v3v4  |
| rs4690116   | FALSE | FALSE | FALSE |         |                       |        |        | 0.9964   | 0.9911   | 0.52                  | 0.5776 | v2v3v4  |
| rs246180    | FALSE | FALSE | FALSE |         |                       |        |        | 0.9068   | 0.6514   | 0.046                 | 0.6706 | v2v3v4  |
| rs3827760   | TRUE  | TRUE  | TRUE  | 1.0000  | 0.13                  | 0.0089 | 0.0077 | 0.9883   | 0.9711   | 0.013                 | 0.0081 | v2v3v4  |
| rs11694173  | FALSE | TRUE  | FALSE | 0.9995  | 0.48                  | 0.52   | 0.8115 | 0.9993   | 0.9973   | 0.26                  | 0.8129 | v2v3v4  |
| rs76972608  | FALSE | FALSE | FALSE |         |                       |        |        | 0.9852   | 0.9606   | 0.57                  | 0.1378 | v2v3v4  |
| rs1819008   | FALSE | FALSE | FALSE |         |                       |        |        | 0.9946   | 0.9877   | 0.14                  | 0.5413 | v2v3v4  |
| rs5933688   | FALSE | FALSE | FALSE |         |                       |        |        | 0.9954   | 0.9899   | 9.6×10 <sup>-5</sup>  | 0.2853 | v2v3v4  |
| rs13405699  | FALSE | FALSE | FALSE |         |                       |        |        | 0.6476   | 0.4863   | 1.5×10 <sup>-13</sup> | 0.9631 | v2v3v4  |

## SNP Statistics in the GWAS Sample

| assay.name  | AA.0 | AB.0 | BB.0 | im.num.0 | dose.b.0 | AA.1 | AB.1 | BB.1 | im.num.1 | dose.b.1 |
|-------------|------|------|------|----------|----------|------|------|------|----------|----------|
| rs200644307 |      |      |      | 8491     | 0.7467   |      |      |      | 9009     | 0.9246   |
| rs201563    |      |      |      | 8491     | 0.5067   |      |      |      | 9009     | 0.6077   |
| rs11684254  |      |      |      | 8491     | 0.3132   |      |      |      | 9009     | 0.3803   |
| rs7801037   |      |      |      | 8491     | 0.6136   |      |      |      | 9009     | 0.5437   |
| rs2095921   |      |      |      | 8491     | 0.2515   |      |      |      | 9009     | 0.2046   |
| rs34991987  |      |      |      | 8491     | 0.4357   |      |      |      | 9009     | 0.4948   |
| rs62385385  |      |      |      | 8491     | 0.5843   |      |      |      | 9009     | 0.6362   |
| rs111763724 |      |      |      | 8491     | 0.0363   |      |      |      | 9009     | 0.0164   |
| rs201408539 |      |      |      | 8491     | 0.8007   |      |      |      | 9009     | 0.8353   |
| rs4679956   |      |      |      | 8491     | 0.3904   |      |      |      | 9009     | 0.4376   |
| rs143149578 |      |      |      | 8491     | 0.0308   |      |      |      | 9009     | 0.0138   |
| rs74333950  |      |      |      | 8491     | 0.8767   |      |      |      | 9009     | 0.8462   |
| rs9282858   | 6173 | 521  | 25   | 8491     | 0.0422   | 6881 | 375  | 0    | 9009     | 0.0259   |
| rs34800162  |      |      |      | 8491     | 0.7136   |      |      |      | 9009     | 0.7497   |
| rs12083887  |      |      |      | 8491     | 0.6251   |      |      |      | 9009     | 0.5853   |
| rs9357047   |      |      |      | 8491     | 0.5895   |      |      |      | 9009     | 0.5520   |
| rs79437808  |      |      |      | 8491     | 0.0087   |      |      |      | 9009     | 0.0171   |
| rs185597083 |      |      |      | 8491     | 0.9473   |      |      |      | 9009     | 0.9663   |
| rs3781458   | 795  | 2899 | 2537 | 8491     | 0.6378   | 1128 | 3110 | 2428 | 9009     | 0.5963   |
| rs62060349  |      |      |      | 8491     | 0.5636   |      |      |      | 9009     | 0.5237   |
| rs11593840  |      |      |      | 8491     | 0.4402   |      |      |      | 9009     | 0.3997   |
| rs9300169   |      |      |      | 8491     | 0.7532   |      |      |      | 9009     | 0.7197   |
| rs6546334   |      |      |      | 8491     | 0.3718   |      |      |      | 9009     | 0.3353   |
| rs12203592  | 5970 | 2289 | 232  | 8491     | 0.1627   | 5948 | 2695 | 366  | 9009     | 0.1905   |
| rs68088846  |      |      |      | 8491     | 0.8031   |      |      |      | 9009     | 0.7749   |
| rs7534070   |      |      |      | 8491     | 0.6576   |      |      |      | 9009     | 0.6275   |
| rs1262557   |      |      |      | 8491     | 0.4552   |      |      |      | 9009     | 0.4861   |
| rs11037975  |      |      |      | 8491     | 0.3138   |      |      |      | 9009     | 0.2849   |
| rs78311490  |      |      |      | 8491     | 0.0785   |      |      |      | 9009     | 0.0620   |
| rs78003935  |      |      |      | 8491     | 0.6874   |      |      |      | 9009     | 0.6581   |
| rs7177657   |      |      |      | 8491     | 0.9133   |      |      |      | 9009     | 0.8940   |
| rs9314998   |      |      |      | 8491     | 0.5542   |      |      |      | 9009     | 0.5872   |
| rs7974517   |      |      |      | 8491     | 0.6344   |      |      |      | 9009     | 0.6052   |
| rs227808    | 5299 | 2812 | 374  | 8491     | 0.2086   | 6009 | 2696 | 299  | 9009     | 0.1822   |
| rs7642536   |      |      |      | 8491     | 0.8799   |      |      |      | 9009     | 0.8593   |
| rs12702271  |      |      |      | 8491     | 0.2273   |      |      |      | 9009     | 0.2548   |
| rs4690116   |      |      |      | 8491     | 0.5927   |      |      |      | 9009     | 0.5624   |
| rs246180    |      |      |      | 8491     | 0.6602   |      |      |      | 9009     | 0.6908   |
| rs3827760   | 8299 | 163  | 0    | 8491     | 0.0097   | 8910 | 76   | 0    | 9009     | 0.0043   |
| rs11694173  | 182  | 1824 | 4239 | 8491     | 0.8226   | 280  | 2127 | 4274 | 9009     | 0.7980   |
| rs76972608  |      |      |      | 8491     | 0.1458   |      |      |      | 9009     | 0.1247   |
| rs1819008   |      |      |      | 8491     | 0.5508   |      |      |      | 9009     | 0.5204   |
| rs5933688   |      |      |      | 8491     | 0.2587   |      |      |      | 9009     | 0.3011   |

## Annotations from NHGRI GWAS Catalog

The following table shows, for each index SNP, all entries in the NHGRI GWAS Catalog that are within 500kb and in at least moderate linkage disequilibrium ( $r^2 > 0.5$ ).

| region   | position  | our.name    | our.pval               | dist    | rsqr  | assay.name | pvalue                 | pubmed.id | trait                          | genes                    |
|----------|-----------|-------------|------------------------|---------|-------|------------|------------------------|-----------|--------------------------------|--------------------------|
| Xq12     | 66300914  | rs200644307 | $1.0 \times 10^{-247}$ | 210070  | 0.684 | rs6625163  | $5.0 \times 10^{-11}$  | 18849991  | Male-pattern baldness          | AR                       |
| Xq12     | 66300914  | rs200644307 | $1.0 \times 10^{-247}$ | 262104  | 0.625 | rs2497938  | $2.0 \times 10^{-91}$  | 22693459  | Male-pattern baldness          | AR                       |
| Xq12     | 66300914  | rs200644307 | $1.0 \times 10^{-247}$ | 262104  | 0.625 | rs2497938  | $3.0 \times 10^{-22}$  | 22032556  | Male-pattern baldness          | AR, EDA2R                |
| 20p11.22 | 22000281  | rs201563    | $2.7 \times 10^{-81}$  | -147181 | 0.602 | rs2180439  | $4.0 \times 10^{-17}$  | 22032556  | Male-pattern baldness          | Intergenic               |
| 20p11.22 | 22000281  | rs201563    | $2.7 \times 10^{-81}$  | -147181 | 0.602 | rs2180439  | $3.0 \times 10^{-15}$  | 18849994  | Male-pattern baldness          | PAX1, BQ013595, BE789145 |
| 20p11.22 | 22000281  | rs201563    | $2.7 \times 10^{-81}$  | 37294   | 0.995 | rs6047844  | $2.0 \times 10^{-39}$  | 22693459  | Male-pattern baldness          | PAX1, FOXA2              |
| 20p11.22 | 22000281  | rs201563    | $2.7 \times 10^{-81}$  | 50222   | 0.902 | rs1160312  | $1.0 \times 10^{-14}$  | 18849991  | Male-pattern baldness          | PAX1                     |
| 2q37.3   | 239695893 | rs11684254  | $2.3 \times 10^{-37}$  | -1262   | 0.890 | rs9287638  | $1.0 \times 10^{-12}$  | 22693459  | Male-pattern baldness          | HDAC4                    |
| 7p21.1   | 18897511  | rs7801037   | $1.3 \times 10^{-36}$  | -19637  | 0.663 | rs2073963  | $1.0 \times 10^{-12}$  | 22693459  | Male-pattern baldness          | HDAC9                    |
| 1p36.22  | 11033322  | rs2095921   | $3.1 \times 10^{-27}$  | -240    | 0.915 | rs12565727 | $9.0 \times 10^{-11}$  | 22693459  | Male-pattern baldness          | TARDBP                   |
| 1p36.22  | 11033322  | rs2095921   | $3.1 \times 10^{-27}$  | 13533   | 0.628 | rs9430161  | $1.0 \times 10^{-20}$  | 22327514  | Ewing sarcoma                  | TARDBP                   |
| 7q11.22  | 68595226  | rs34991987  | $2.3 \times 10^{-26}$  | 16734   | 0.868 | rs6945541  | $2.0 \times 10^{-9}$   | 22693459  | Male-pattern baldness          | AUTS2                    |
| 17q21.31 | 44166078  | rs201408539 | $8.4 \times 10^{-20}$  | -451228 | 0.702 | rs2942168  | $1.0 \times 10^{-28}$  | 21292315  | Parkinson's disease            | MAPT                     |
| 17q21.31 | 44166078  | rs201408539 | $8.4 \times 10^{-20}$  | -446935 | 0.697 | rs393152   | $2.0 \times 10^{-16}$  | 19915575  | Parkinson's disease            | MAPT, C17orf69, ...      |
| 17q21.31 | 44166078  | rs201408539 | $8.4 \times 10^{-20}$  | -242395 | 0.702 | rs12185268 | $3.0 \times 10^{-14}$  | 21738487  | Parkinson's disease            | MAPT                     |
| 17q21.31 | 44166078  | rs201408539 | $8.4 \times 10^{-20}$  | -241859 | 0.693 | rs12373124 | $5.0 \times 10^{-10}$  | 22693459  | Male-pattern baldness          | Intergenic               |
| 17q21.31 | 44166078  | rs201408539 | $8.4 \times 10^{-20}$  | -188251 | 0.702 | rs1864325  | $5.0 \times 10^{-11}$  | 22504420  | Bone mineral density           | MAPT                     |
| 17q21.31 | 44166078  | rs201408539 | $8.4 \times 10^{-20}$  | -109311 | 0.702 | rs1981997  | $9.0 \times 10^{-14}$  | 23583980  | Interstitial lung disease      | MAPT                     |
| 17q21.31 | 44166078  | rs201408539 | $8.4 \times 10^{-20}$  | -85014  | 0.693 | rs8070723  | $2.0 \times 10^{-118}$ | 21685912  | Progressive supranuclear palsy | MAPT                     |
| 17q21.31 | 44166078  | rs201408539 | $8.4 \times 10^{-20}$  | -85014  | 0.693 | rs8070723  | $7.0 \times 10^{-12}$  | 21044948  | Parkinson's disease            | MAPT                     |
| 17q21.31 | 44166078  | rs201408539 | $8.4 \times 10^{-20}$  | 21179   | 0.682 | rs9303525  | $8.0 \times 10^{-15}$  | 22504418  | Intracranial volume            | MAPT, GRN, ...           |
| 2q35     | 219746292 | rs74333950  | $2.2 \times 10^{-16}$  | 10091   | 0.975 | rs7349332  | $3.0 \times 10^{-14}$  | 20585627  | Common traits (Other)          | WNT10A                   |
| 2q35     | 219746292 | rs74333950  | $2.2 \times 10^{-16}$  | 10091   | 0.975 | rs7349332  | $1.0 \times 10^{-6}$   | 19896111  | Hair morphology                | WNT10A                   |
| 18q12.3  | 42808059  | rs34800162  | $8.2 \times 10^{-15}$  | -7911   | 1.000 | rs10502861 | $3.0 \times 10^{-9}$   | 22693459  | Male-pattern baldness          | SETBP1                   |
| 6p25.3   | 396321    | rs12203592  | $4.0 \times 10^{-11}$  | 0       | 1.000 | rs12203592 | $3.0 \times 10^{-23}$  | 23548203  | Tanning                        | IRF4                     |
| 6p25.3   | 396321    | rs12203592  | $4.0 \times 10^{-11}$  | 0       | 1.000 | rs12203592 | $2.0 \times 10^{-6}$   | 23548203  | Sunburns                       | IRF4                     |
| 6p25.3   | 396321    | rs12203592  | $4.0 \times 10^{-11}$  | 0       | 1.000 | rs12203592 | $7.0 \times 10^{-14}$  | 23548203  | Non-melanoma skin cancer       | IRF4                     |
| 6p25.3   | 396321    | rs12203592  | $4.0 \times 10^{-11}$  | 0       | 1.000 | rs12203592 | $1.0 \times 10^{-28}$  | 23548203  | Hair color                     | IRF4                     |
| 6p25.3   | 396321    | rs12203592  | $4.0 \times 10^{-11}$  | 0       | 1.000 | rs12203592 | $6.0 \times 10^{-15}$  | 21685912  | Progressive supranuclear palsy | IRF4                     |
| 6p25.3   | 396321    | rs12203592  | $4.0 \times 10^{-11}$  | 0       | 1.000 | rs12203592 | $4.0 \times 10^{-7}$   | 20585627  | Hair color                     | IRF4                     |
| 6p25.3   | 396321    | rs12203592  | $4.0 \times 10^{-11}$  | 0       | 1.000 | rs12203592 | $2.0 \times 10^{-91}$  | 20585627  | Freckling                      | IRF4                     |
| 6p25.3   | 396321    | rs12203592  | $4.0 \times 10^{-11}$  | 0       | 1.000 | rs12203592 | $2.0 \times 10^{-15}$  | 20585627  | Eye color                      | IRF4                     |
| 6p25.3   | 396321    | rs12203592  | $4.0 \times 10^{-11}$  | 0       | 1.000 | rs12203592 | $9.0 \times 10^{-28}$  | 18483556  | Black vs. red hair color       | IRF4                     |
| 6p25.3   | 396321    | rs12203592  | $4.0 \times 10^{-11}$  | 0       | 1.000 | rs12203592 | $7.0 \times 10^{-127}$ | 18483556  | Black vs. blond hair color     | IRF4                     |
| 6q22.32  | 127054588 | rs1262557   | $4.8 \times 10^{-10}$  | -355869 | 0.686 | rs9388489  | $4.0 \times 10^{-13}$  | 19430480  | Type 1 diabetes                | C6orf173                 |
| 6q22.32  | 127054588 | rs1262557   | $4.8 \times 10^{-10}$  | -286988 | 0.698 | rs1361108  | $9.0 \times 10^{-6}$   | 21998595  | Height                         | Intergenic               |
| 6q22.32  | 127054588 | rs1262557   | $4.8 \times 10^{-10}$  | -286988 | 0.698 | rs1361108  | $2.0 \times 10^{-8}$   | 21102462  | Menarche (age at onset)        | C6orf173, TRMT11         |
| 6q22.32  | 127054588 | rs1262557   | $4.8 \times 10^{-10}$  | -218933 | 0.694 | rs1490388  | $6.0 \times 10^{-7}$   | 18391951  | Height                         | C6orf173                 |
| 6q22.32  | 127054588 | rs1262557   | $4.8 \times 10^{-10}$  | -203428 | 0.802 | rs1490384  | $1.0 \times 10^{-16}$  | 23563607  | Height                         | C6orf173                 |
| 6q22.32  | 127054588 | rs1262557   | $4.8 \times 10^{-10}$  | -203428 | 0.802 | rs1490384  | $4.0 \times 10^{-21}$  | 20881960  | Height                         | C6orf173                 |
| 6q22.32  | 127054588 | rs1262557   | $4.8 \times 10^{-10}$  | -88280  | 0.875 | rs4549631  | $5.0 \times 10^{-13}$  | 18391952  | Height                         | LOC387103                |
| 15q23    | 70041693  | rs7177657   | $1.0 \times 10^{-9}$   | 6464    | 1.000 | rs10152591 | $3.0 \times 10^{-10}$  | 20881960  | Height                         | TLE3                     |
| 16p13.12 | 14391923  | rs246180    | $8.0 \times 10^{-9}$   | -3618   | 0.916 | rs1659127  | $4.0 \times 10^{-9}$   | 21102462  | Menarche (age at onset)        | MKL2                     |
| 16p13.12 | 14391923  | rs246180    | $8.0 \times 10^{-9}$   | -3618   | 0.916 | rs1659127  | $1.0 \times 10^{-11}$  | 20881960  | Height                         | MKL2                     |
| Xp22.31  | 8880680   | rs5933688   | $3.7 \times 10^{-8}$   | 33146   | 0.948 | rs5934505  | $2.0 \times 10^{-8}$   | 22936694  | Androgen levels                | FAM9B                    |

## Replication of GWAS Catalog Results

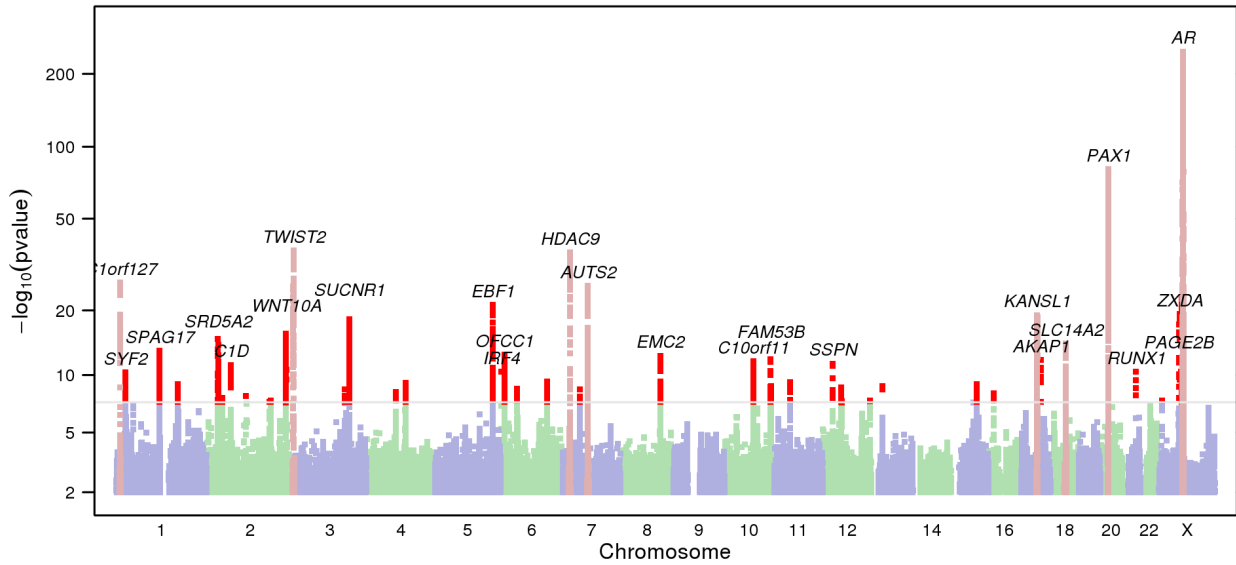

The following table shows, for each GWAS Catalog result for similar traits, our association test result for our best available proxy (distance < 100kb,  $r^2 > 0.8$ ).

| region   | position  | our.name   | our.pval               | dist | rsqr  | assay.name | pvalue                | pubmed.id | trait                 | genes                    |
|----------|-----------|------------|------------------------|------|-------|------------|-----------------------|-----------|-----------------------|--------------------------|
| 1p36.22  | 11033082  | rs12565727 | $9.9 \times 10^{-27}$  | 0    | 1.000 | rs12565727 | $9.0 \times 10^{-11}$ | 22693459  | Male-pattern baldness | TARDBP                   |
| 2q37.3   | 239694631 | rs9287638  | $4.7 \times 10^{-35}$  | 0    | 1.000 | rs9287638  | $1.0 \times 10^{-12}$ | 22693459  | Male-pattern baldness | HDAC4                    |
| 7p21.1   | 18877874  | rs2073963  | $1.2 \times 10^{-26}$  | 0    | 1.000 | rs2073963  | $1.0 \times 10^{-12}$ | 22693459  | Male-pattern baldness | HDAC9                    |
| 7q11.22  | 68611960  | rs6945541  | $4.1 \times 10^{-22}$  | 0    | 1.000 | rs6945541  | $2.0 \times 10^{-9}$  | 22693459  | Male-pattern baldness | AUTS2                    |
| 17q21.31 | 43924219  | rs12373124 | $3.4 \times 10^{-18}$  | 0    | 1.000 | rs12373124 | $5.0 \times 10^{-10}$ | 22693459  | Male-pattern baldness | Intergenic               |
| 18q12.3  | 42800148  | rs10502861 | $1.0 \times 10^{-14}$  | 0    | 1.000 | rs10502861 | $3.0 \times 10^{-9}$  | 22693459  | Male-pattern baldness | SETBP1                   |
| 20p11.22 | 21853100  | rs2180439  | $3.2 \times 10^{-78}$  | 0    | 1.000 | rs2180439  | $4.0 \times 10^{-17}$ | 22032556  | Male-pattern baldness | Intergenic               |
| 20p11.22 | 21853100  | rs2180439  | $3.2 \times 10^{-78}$  | 0    | 1.000 | rs2180439  | $3.0 \times 10^{-15}$ | 18849994  | Male-pattern baldness | PAX1, BQ013595, BE789145 |
| 20p11.22 | 22037575  | rs6047844  | $9.3 \times 10^{-81}$  | 0    | 1.000 | rs6047844  | $2.0 \times 10^{-39}$ | 22693459  | Male-pattern baldness | PAX1, FOXA2              |
| 20p11.22 | 22050503  | rs1160312  | $2.8 \times 10^{-75}$  | 0    | 1.000 | rs1160312  | $1.0 \times 10^{-14}$ | 18849991  | Male-pattern baldness | PAX1                     |
| Xq12     | 66510984  | rs6625163  | $2.5 \times 10^{-232}$ | 0    | 1.000 | rs6625163  | $5.0 \times 10^{-11}$ | 18849991  | Male-pattern baldness | AR                       |
| Xq12     | 66563018  | rs2497938  | $7.0 \times 10^{-229}$ | 0    | 1.000 | rs2497938  | $2.0 \times 10^{-91}$ | 22693459  | Male-pattern baldness | AR                       |
| Xq12     | 66563018  | rs2497938  | $7.0 \times 10^{-229}$ | 0    | 1.000 | rs2497938  | $3.0 \times 10^{-22}$ | 22032556  | Male-pattern baldness | AR, EDA2R                |

## Nearby Nonsynonymous SNPs

| region   | position  | our.name    | our.pval              | dist    | rsqr  | assay.name  | gene    | aa.chg |
|----------|-----------|-------------|-----------------------|---------|-------|-------------|---------|--------|
| 17q21.31 | 44166078  | rs201408539 | $8.4 \times 10^{-20}$ | -243136 | 0.702 | rs62621252  | SPPL2C  | S224P  |
| 17q21.31 | 44166078  | rs201408539 | $8.4 \times 10^{-20}$ | -242812 | 0.702 | rs62054815  | SPPL2C  | A332T  |
| 17q21.31 | 44166078  | rs201408539 | $8.4 \times 10^{-20}$ | -242424 | 0.702 | rs12185233  | SPPL2C  | R461P  |
| 17q21.31 | 44166078  | rs201408539 | $8.4 \times 10^{-20}$ | -242395 | 0.702 | rs12185268  | SPPL2C  | I471V  |
| 17q21.31 | 44166078  | rs201408539 | $8.4 \times 10^{-20}$ | -242005 | 0.702 | rs12373123  | SPPL2C  | S601P  |
| 17q21.31 | 44166078  | rs201408539 | $8.4 \times 10^{-20}$ | -241948 | 0.702 | rs12373139  | SPPL2C  | G620R  |
| 17q21.31 | 44166078  | rs201408539 | $8.4 \times 10^{-20}$ | -241878 | 0.693 | rs12373142  | SPPL2C  | P643R  |
| 17q21.31 | 44166078  | rs201408539 | $8.4 \times 10^{-20}$ | -241859 | 0.693 | rs12373124  | SPPL2C  | H649H  |
| 17q21.31 | 44166078  | rs201408539 | $8.4 \times 10^{-20}$ | -241847 | 0.693 | rs12373140  | SPPL2C  | Q653Q  |
| 17q21.31 | 44166078  | rs201408539 | $8.4 \times 10^{-20}$ | -105303 | 0.702 | rs63750417  | MAPT    | P202L  |
| 17q21.31 | 44166078  | rs201408539 | $8.4 \times 10^{-20}$ | -105055 | 0.702 | rs62063786  | MAPT    | D285N  |
| 17q21.31 | 44166078  | rs201408539 | $8.4 \times 10^{-20}$ | -105042 | 0.702 | rs62063787  | MAPT    | V289A  |
| 17q21.31 | 44166078  | rs201408539 | $8.4 \times 10^{-20}$ | -104800 | 0.702 | rs17651549  | MAPT    | R370W  |
| 17q21.31 | 44166078  | rs201408539 | $8.4 \times 10^{-20}$ | -98678  | 0.702 | rs10445337  | MAPT    | S447P  |
| 17q21.31 | 44166078  | rs201408539 | $8.4 \times 10^{-20}$ | -61667  | 0.696 | rs199706121 | MAPT    | ?1735? |
| 17q21.31 | 44166078  | rs201408539 | $8.4 \times 10^{-20}$ | -57592  | 0.570 | rs200384907 | KANSL1  | ?1225? |
| 17q21.31 | 44166078  | rs201408539 | $8.4 \times 10^{-20}$ | -57172  | 0.702 | rs34579536  | KANSL1  | I1085T |
| 17q21.31 | 44166078  | rs201408539 | $8.4 \times 10^{-20}$ | -55546  | 0.702 | rs36076725  | KANSL1  | F917F  |
| 17q21.31 | 44166078  | rs201408539 | $8.4 \times 10^{-20}$ | -55537  | 0.702 | rs35833914  | KANSL1  | D914D  |
| 17q21.31 | 44166078  | rs201408539 | $8.4 \times 10^{-20}$ | -48959  | 0.702 | rs34043286  | KANSL1  | S718P  |
| 17q21.31 | 44166078  | rs201408539 | $8.4 \times 10^{-20}$ | 82759   | 0.568 | rs35643216  | KANSL1  | N225D  |
| 17q21.31 | 44166078  | rs201408539 | $8.4 \times 10^{-20}$ | 83121   | 0.568 | rs17585974  | KANSL1  | K104T  |
| 2p23.1   | 31805826  | rs9282858   | $1.5 \times 10^{-15}$ | 0       | 1.000 | rs9282858   | SRD5A2  | A48T   |
| 4q25     | 107883049 | rs78311490  | $6.7 \times 10^{-10}$ | -36006  | 0.503 | rs35290077  | DKK2    | G96R   |
| 12q13.12 | 51145082  | rs7974517   | $2.0 \times 10^{-9}$  | -417376 | 0.611 | rs6580741   | FAM186A | H2228Q |
| 12q13.12 | 51145082  | rs7974517   | $2.0 \times 10^{-9}$  | -400963 | 0.614 | rs7296291   | FAM186A | H2166Y |
| 12q13.12 | 51145082  | rs7974517   | $2.0 \times 10^{-9}$  | -398165 | 0.610 | rs10876023  | FAM186A | L1233P |
| 12q13.12 | 51145082  | rs7974517   | $2.0 \times 10^{-9}$  | -390519 | 0.614 | rs12303082  | FAM186A | K187Q  |
| 2q12.3   | 109513601 | rs3827760   | $1.3 \times 10^{-8}$  | 0       | 1.000 | rs3827760   | EDAR    | V370A  |

## Nearby Expression QTLs

| region   | position  | our.name    | our.pval              | dist    | rsqr  | assay.name  | eql.dist | eql.gene  | eql.pval              | eql.rsqr | tissue         | pubmed.id |
|----------|-----------|-------------|-----------------------|---------|-------|-------------|----------|-----------|-----------------------|----------|----------------|-----------|
| 20p11.22 | 22000281  | rs201563    | $2.7 \times 10^{-81}$ | 76273   | 0.617 | rs804531    | -779453  | XRN2      | 0.00012               |          | Lymphoblastoid | 20220756  |
| 17q21.31 | 44166078  | rs201408539 | $8.4 \times 10^{-20}$ | -446935 | 0.697 | rs393152    | 580720   | NMT1      | 0.00045               | 0.156    | Lymphoblastoid | 19644074  |
| 17q21.31 | 44166078  | rs201408539 | $8.4 \times 10^{-20}$ | -414165 | 0.605 | rs1635291   | 175935   | HS.554608 | 0.00060               | 0.041    | B-Cell         | 22446964  |
| 17q21.31 | 44166078  | rs201408539 | $8.4 \times 10^{-20}$ | 168210  | 0.641 | rs142039218 | 666195   | GOSR2     | $7.4 \times 10^{-13}$ | 0.130    | Lymphoblastoid | 24037378  |
| 17q21.31 | 44166078  | rs201408539 | $8.4 \times 10^{-20}$ | 180592  | 0.557 | rs139480590 | 647403   | CRHR1     | $2.4 \times 10^{-11}$ | 0.113    | Lymphoblastoid | 24037378  |
| 2q35     | 219746292 | rs74333950  | $2.2 \times 10^{-16}$ | 20380   | 0.755 | rs10932789  | 636628   | ACCN4     | $9.0 \times 10^{-5}$  | 0.054    | Monocyte       | 22446964  |
| 17q22    | 55231168  | rs62060349  | $1.5 \times 10^{-12}$ | -3498   | 0.812 | rs8081915   | 821240   | VEZF1     | $4.6 \times 10^{-5}$  | 0.204    | Fibroblast     | 19644074  |
| 12q13.12 | 51145082  | rs7974517   | $2.0 \times 10^{-9}$  | -439367 | 0.557 | rs6580738   | 28425    | LIMA1     | $2.6 \times 10^{-19}$ | 0.056    | Monocyte       | 20502693  |
| 12q13.12 | 51145082  | rs7974517   | $2.0 \times 10^{-9}$  | -406074 | 0.557 | rs4768951   | -215091  | LASS5     | $2.5 \times 10^{-9}$  | 0.119    | Monocyte       | 22446964  |
| 12q13.12 | 51145082  | rs7974517   | $2.0 \times 10^{-9}$  | -406074 | 0.557 | rs4768951   | -215091  | LASS5     | $1.2 \times 10^{-9}$  | 0.124    | B-Cell         | 22446964  |
| 12q13.12 | 51145082  | rs7974517   | $2.0 \times 10^{-9}$  | -390519 | 0.614 | rs12303082  | -184541  | LIMA1     | $9.1 \times 10^{-12}$ | 0.154    | Monocyte       | 22446964  |
| 12q13.12 | 51145082  | rs7974517   | $2.0 \times 10^{-9}$  | -205275 | 0.749 | rs7487429   | 378662   | LASS5     | $2.3 \times 10^{-22}$ | 0.065    | Monocyte       | 20502693  |
| 12q13.12 | 51145082  | rs7974517   | $2.0 \times 10^{-9}$  | -71559  | 0.610 | rs11169520  | 68656    | DIP2B     | $5.2 \times 10^{-9}$  | 0.117    | Monocyte       | 22446964  |
| 12q13.12 | 51145082  | rs7974517   | $2.0 \times 10^{-9}$  | -70209  | 0.610 | rs7955736   | 0        | DIP2B     | $5.1 \times 10^{-26}$ | 0.075    | Monocyte       | 20502693  |
| 12q13.12 | 51145082  | rs7974517   | $2.0 \times 10^{-9}$  | -58151  | 0.765 | rs2090852   | -731724  | LOC643435 | 0.00011               | 0.053    | Monocyte       | 22446964  |
| 12q13.12 | 51145082  | rs7974517   | $2.0 \times 10^{-9}$  | -6220   | 0.581 | rs1047912   | 240094   | DIP2B     | $8.4 \times 10^{-24}$ | 0.239    | Lymphoblastoid | 24037378  |
| 12q13.12 | 51145082  | rs7974517   | $2.0 \times 10^{-9}$  | 35061   | 0.961 | rs10783387  | 145977   | METTL7A   | 0.00057               | 0.042    | B-Cell         | 22446964  |
| 4q21.21  | 81206377  | rs4690116   | $5.5 \times 10^{-9}$  | -5732   | 0.962 | rs6827834   | 773916   | BMP3      | 0.0014                | 0.036    | B-Cell         | 22446964  |
| 2p21     | 43590899  | rs11694173  | $2.2 \times 10^{-8}$  | 0       | 1.000 | rs11694173  | -139827  | ZFP36L2   | 0.00034               | 0.045    | Monocyte       | 22446964  |

## Nearby Clinical Variants

| source  | region | our.name  | our.pval              | dist | rsqr  | assay.name | gene   | phenotype                                                      | accession            |
|---------|--------|-----------|-----------------------|------|-------|------------|--------|----------------------------------------------------------------|----------------------|
| clinvar | 2p23.1 | rs9282858 | $1.5 \times 10^{-15}$ | 0    | 1.000 | rs9282858  | SRD5A2 | 3-Oxo-5 alpha-steroid delta 4-dehydrogenase deficiency         | SNOMED<br>CT57514000 |
| clinvar | 2q12.3 | rs3827760 | $1.3 \times 10^{-8}$  | 0    | 1.000 | rs3827760  | EDAR   | Autosomal recessive hypohidrotic ectodermal dysplasia syndrome | SNOMED<br>CT27025001 |
| clinvar | 2q12.3 | rs3827760 | $1.3 \times 10^{-8}$  | 0    | 1.000 | rs3827760  | EDAR   | Autosomal dominant hypohidrotic ectodermal dysplasia           | NCBI curation        |
| clinvar | 2q12.3 | rs3827760 | $1.3 \times 10^{-8}$  | 0    | 1.000 | rs3827760  | EDAR   | Hair morphology 1                                              | NCBI curation        |

## Regional Association Plots

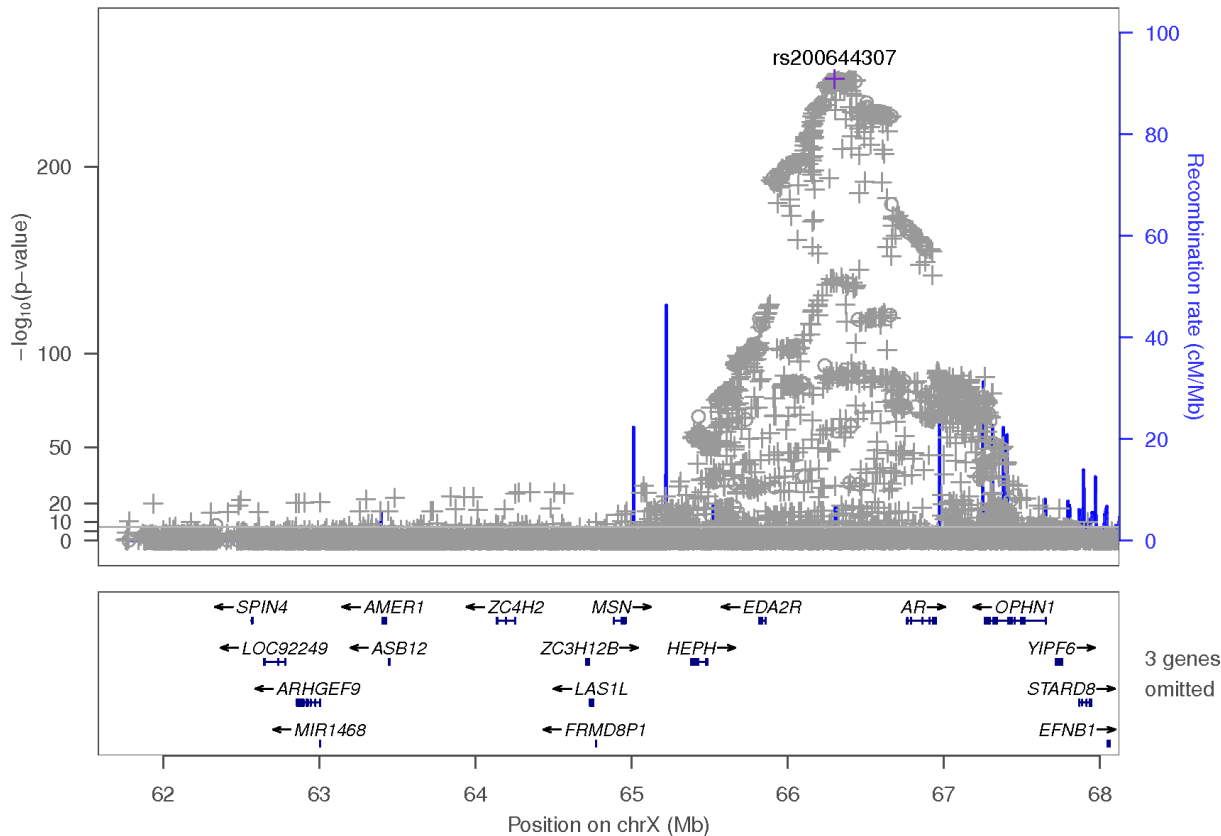

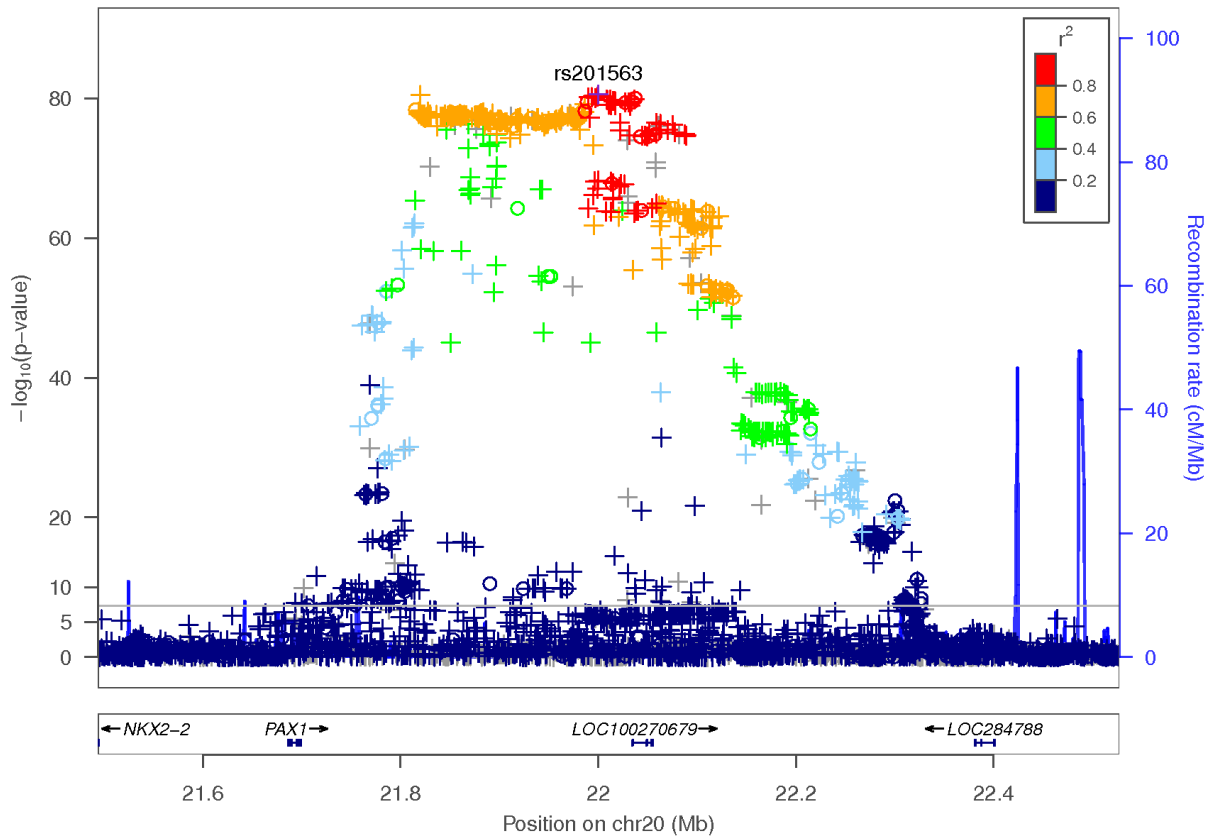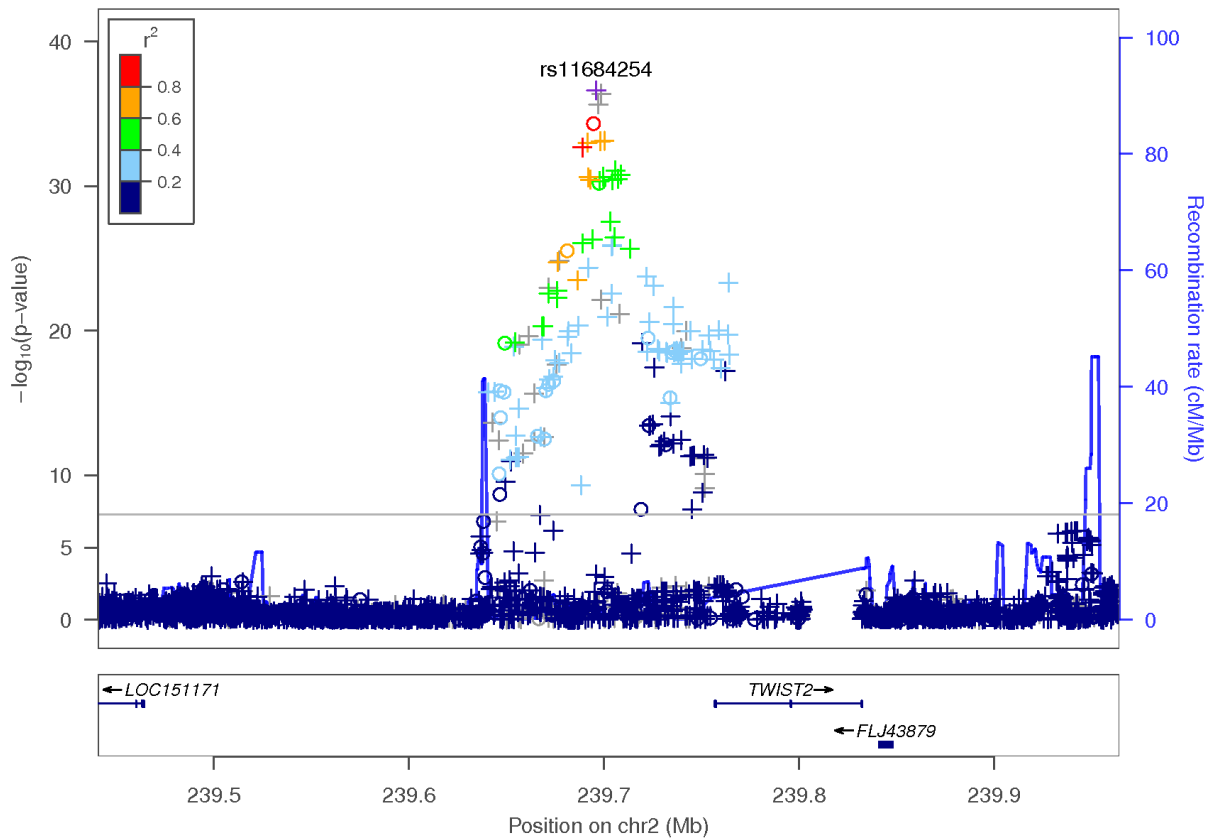



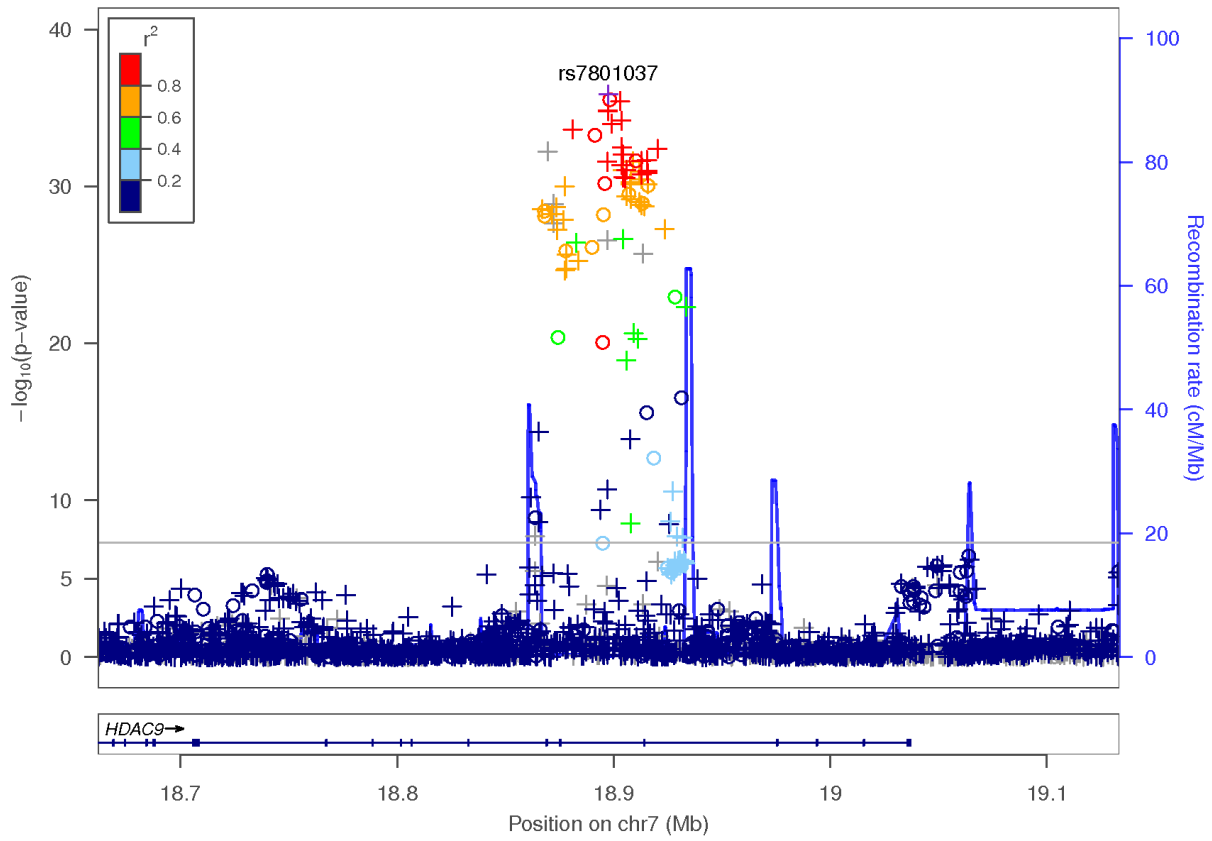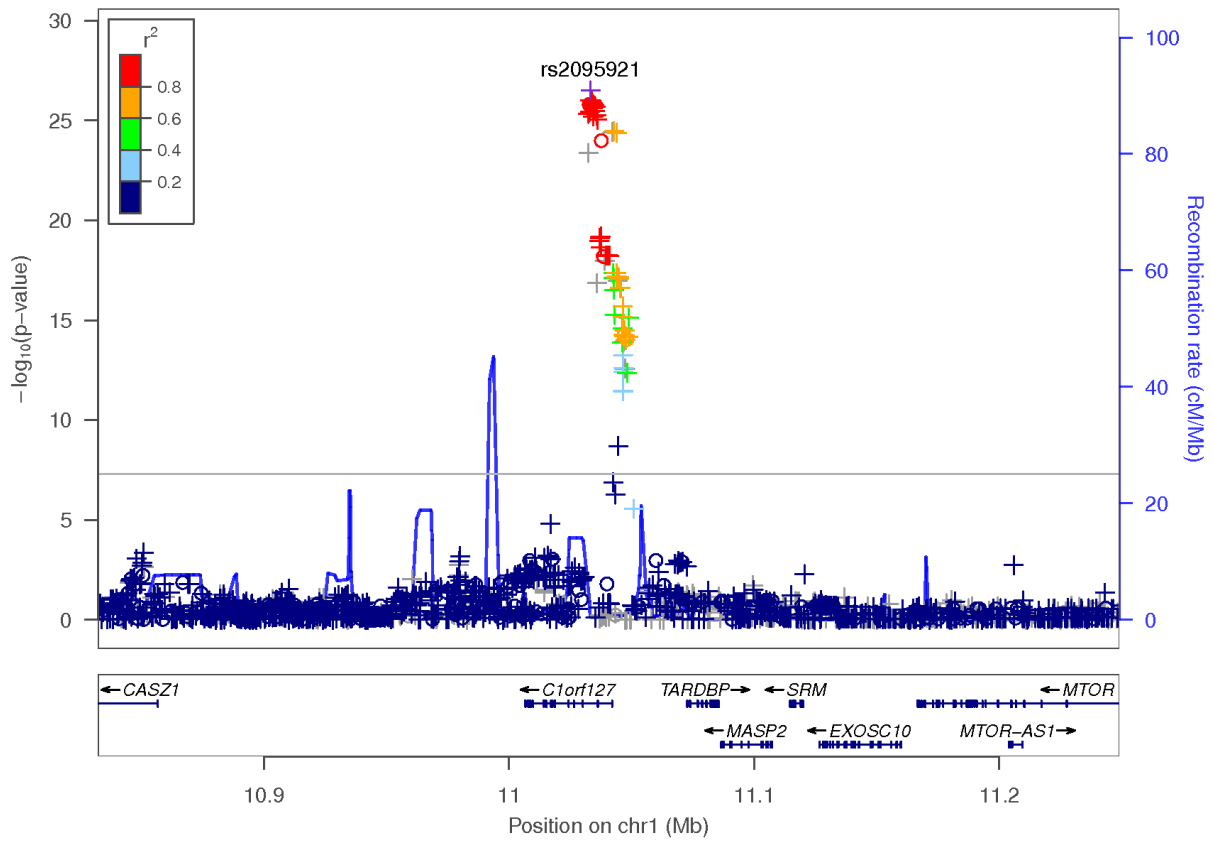

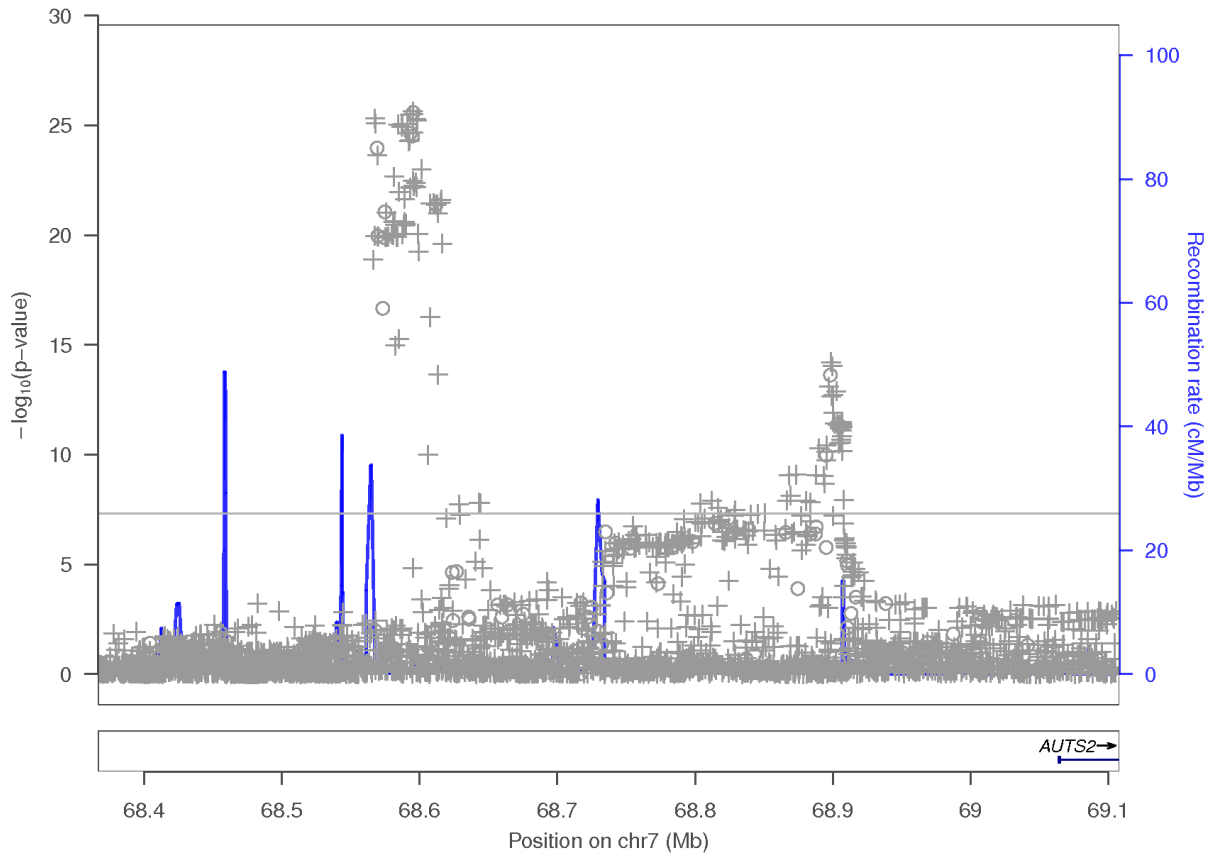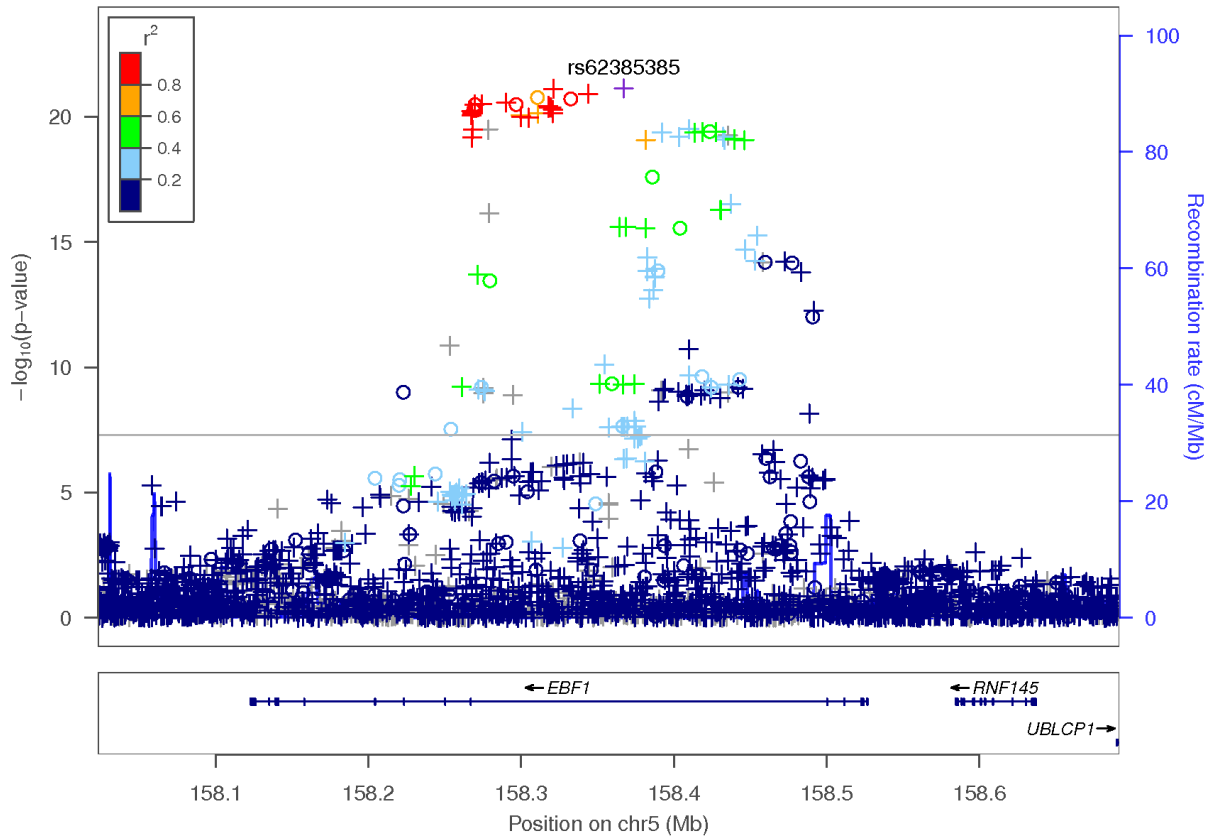

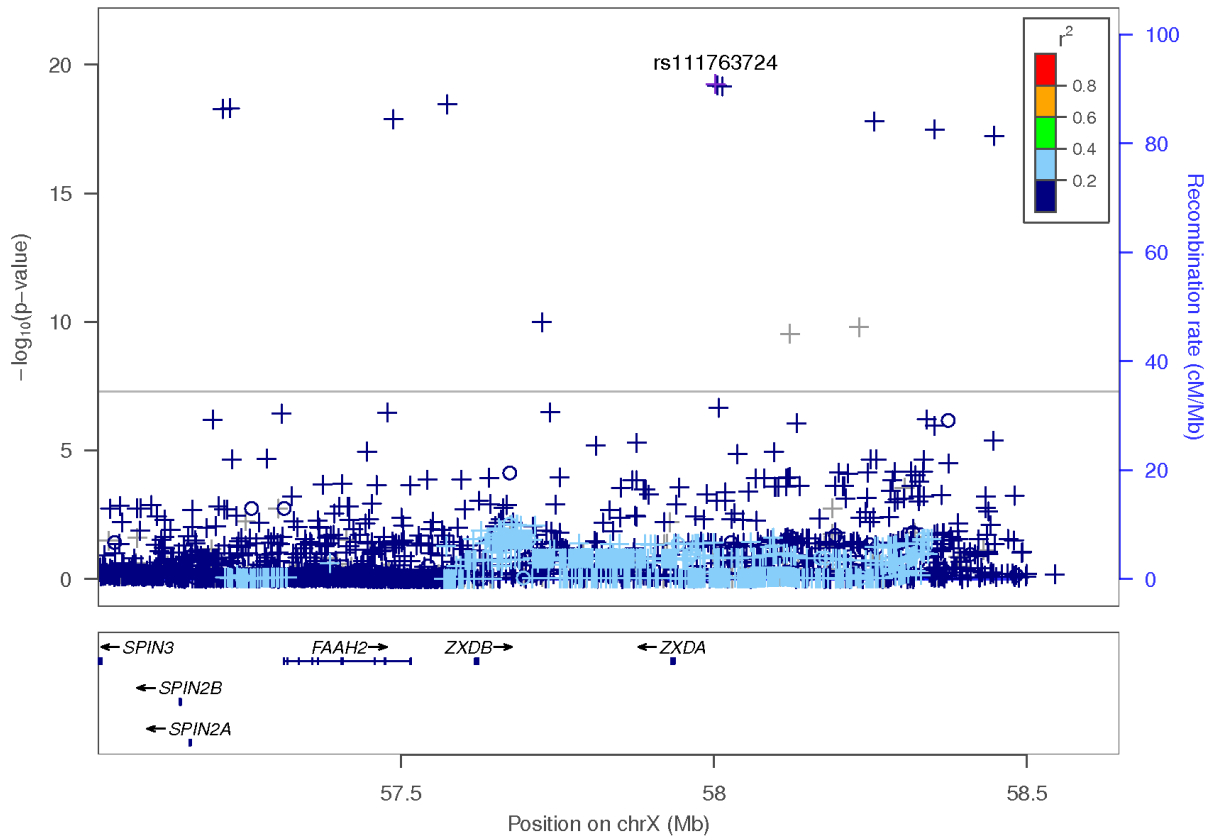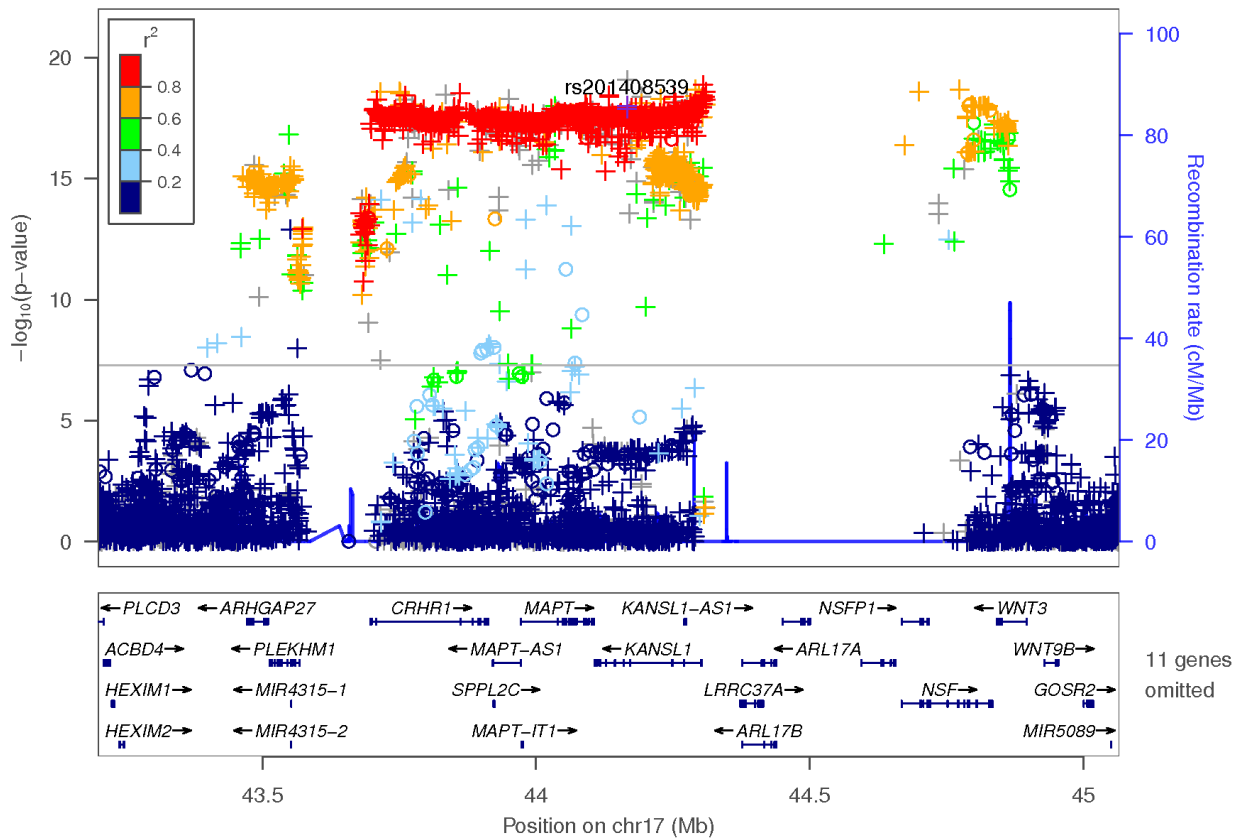

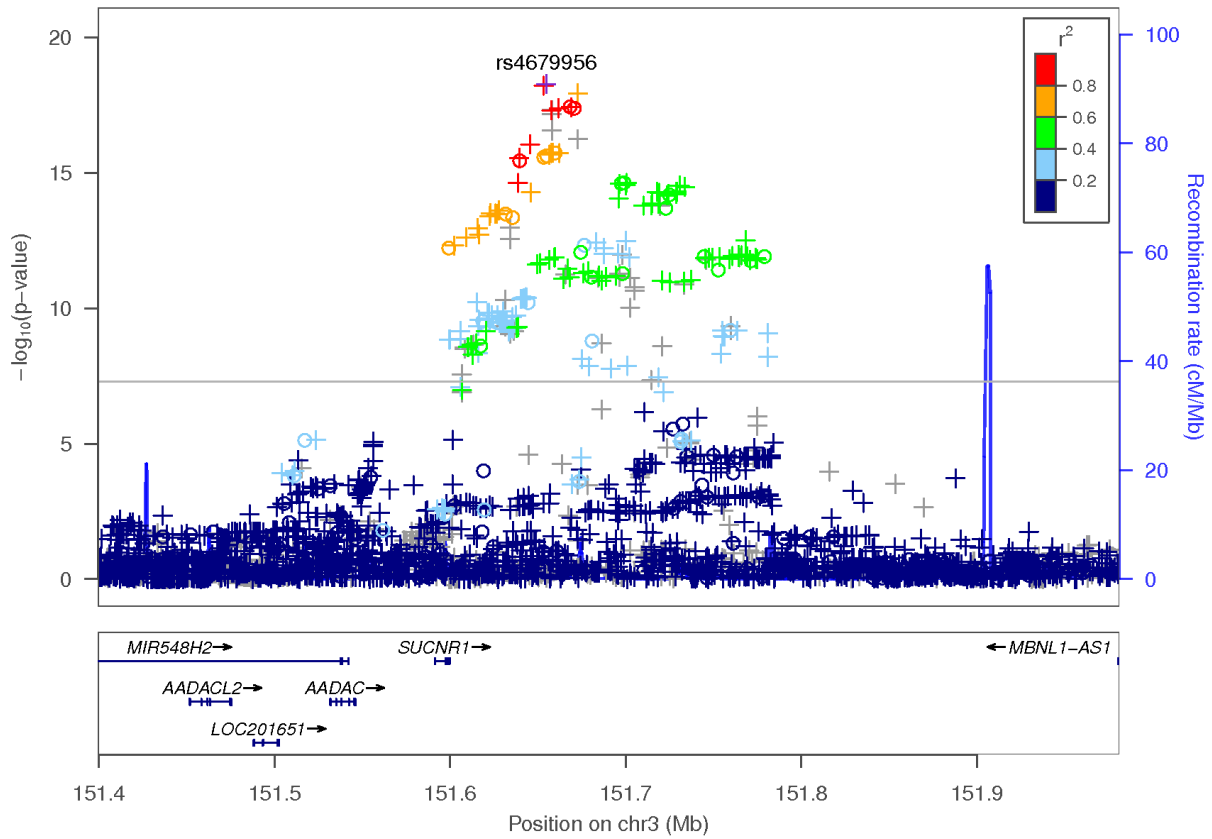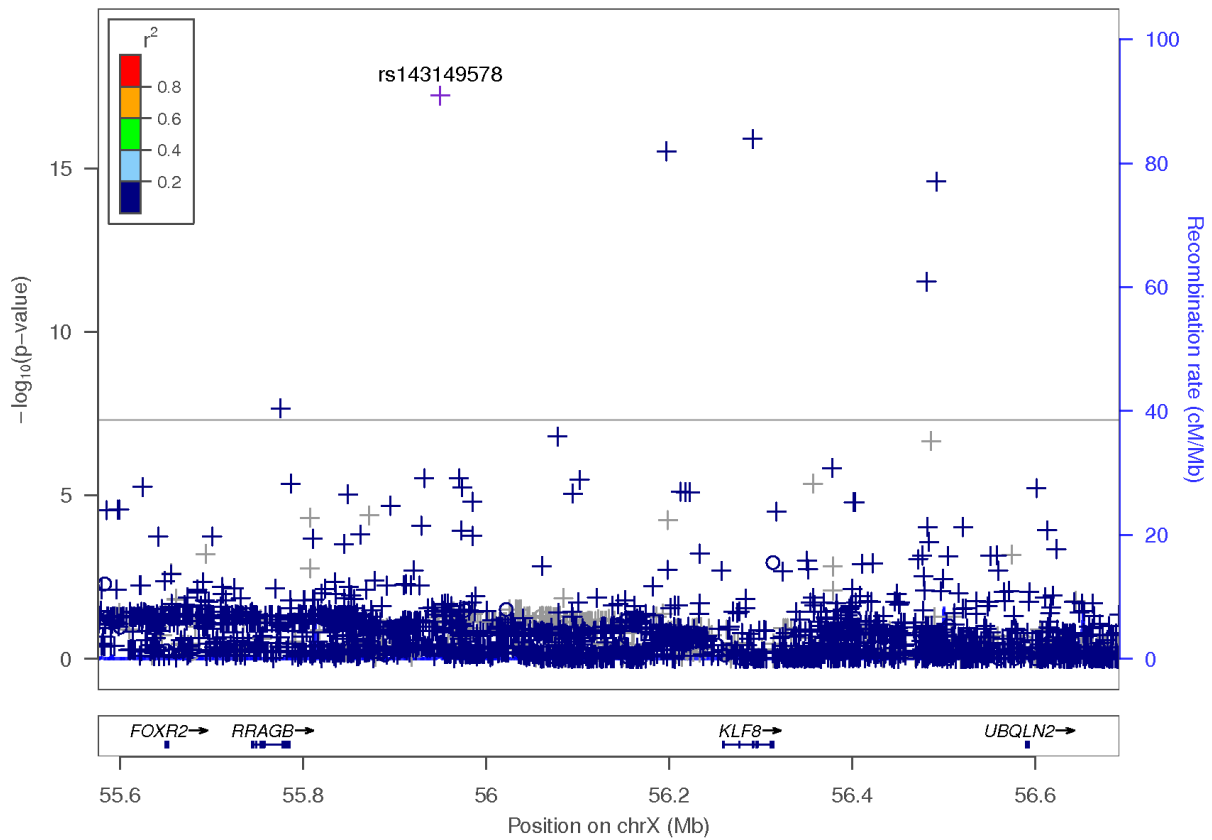

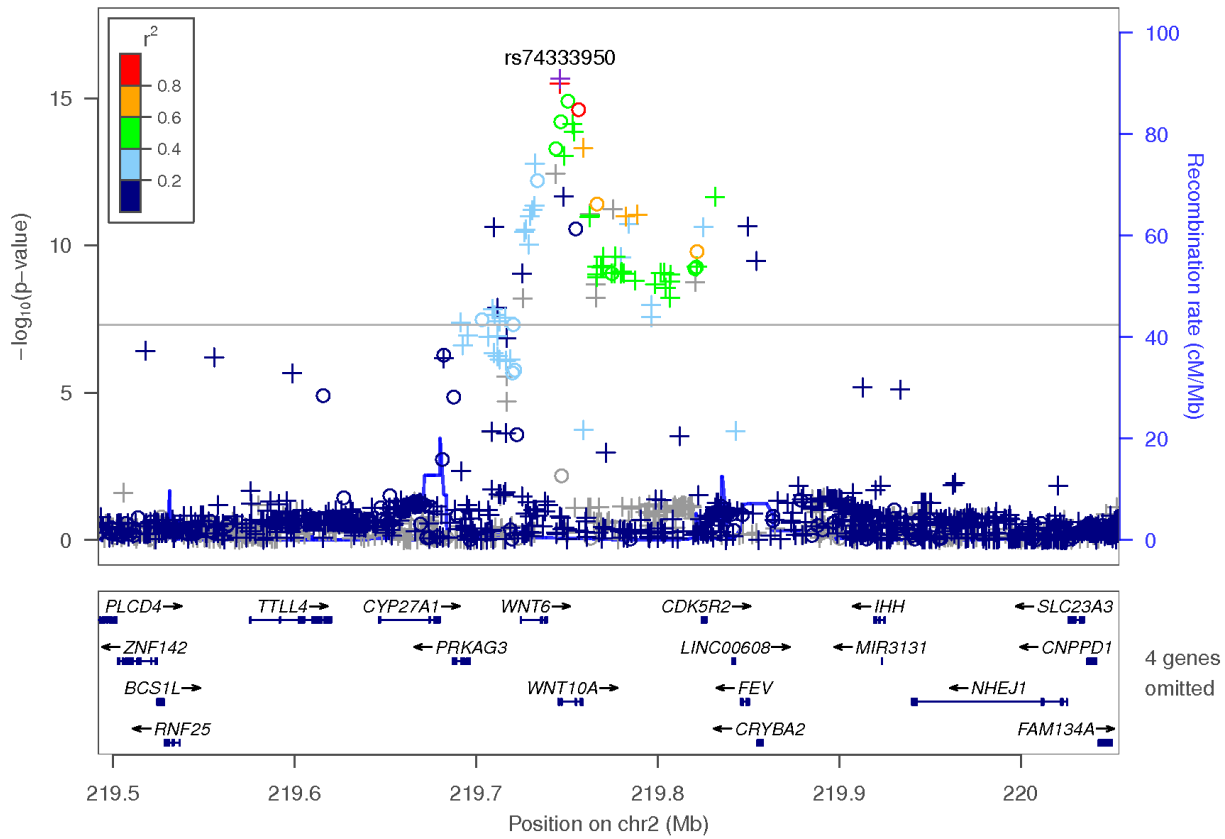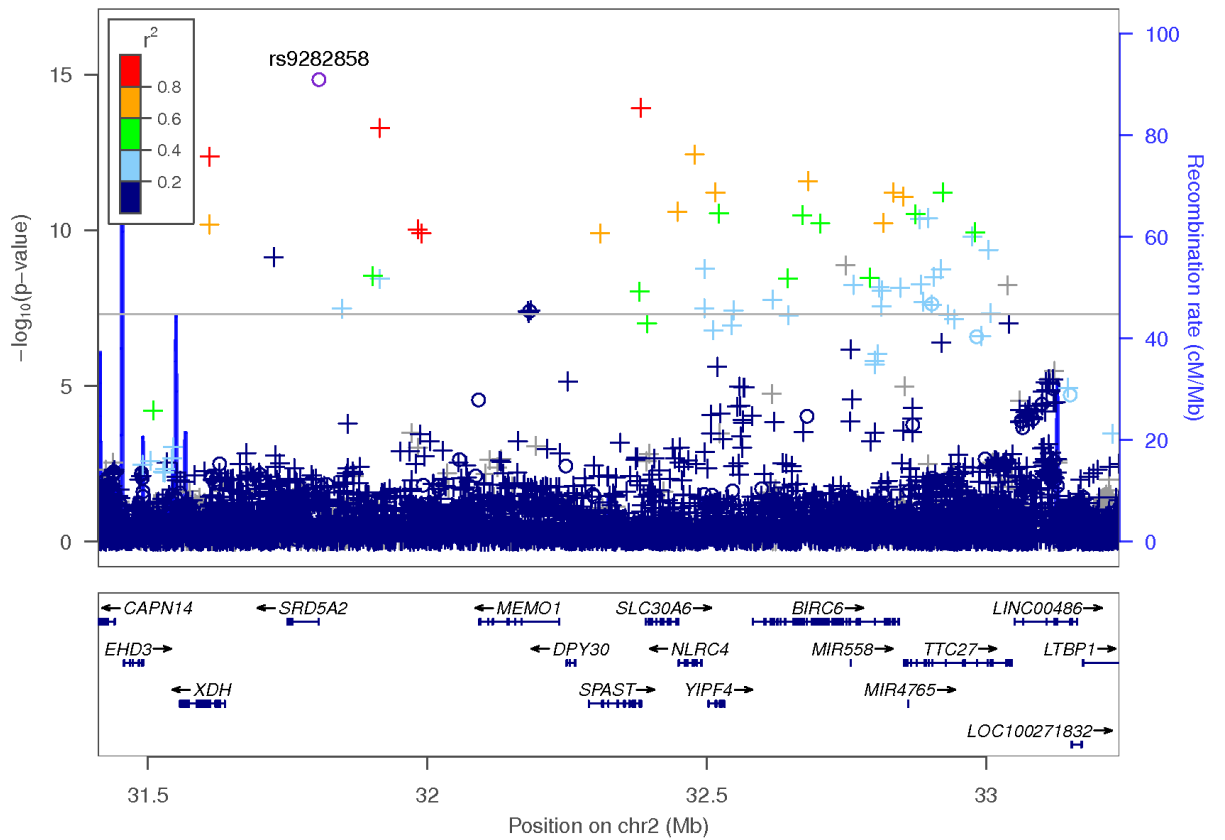

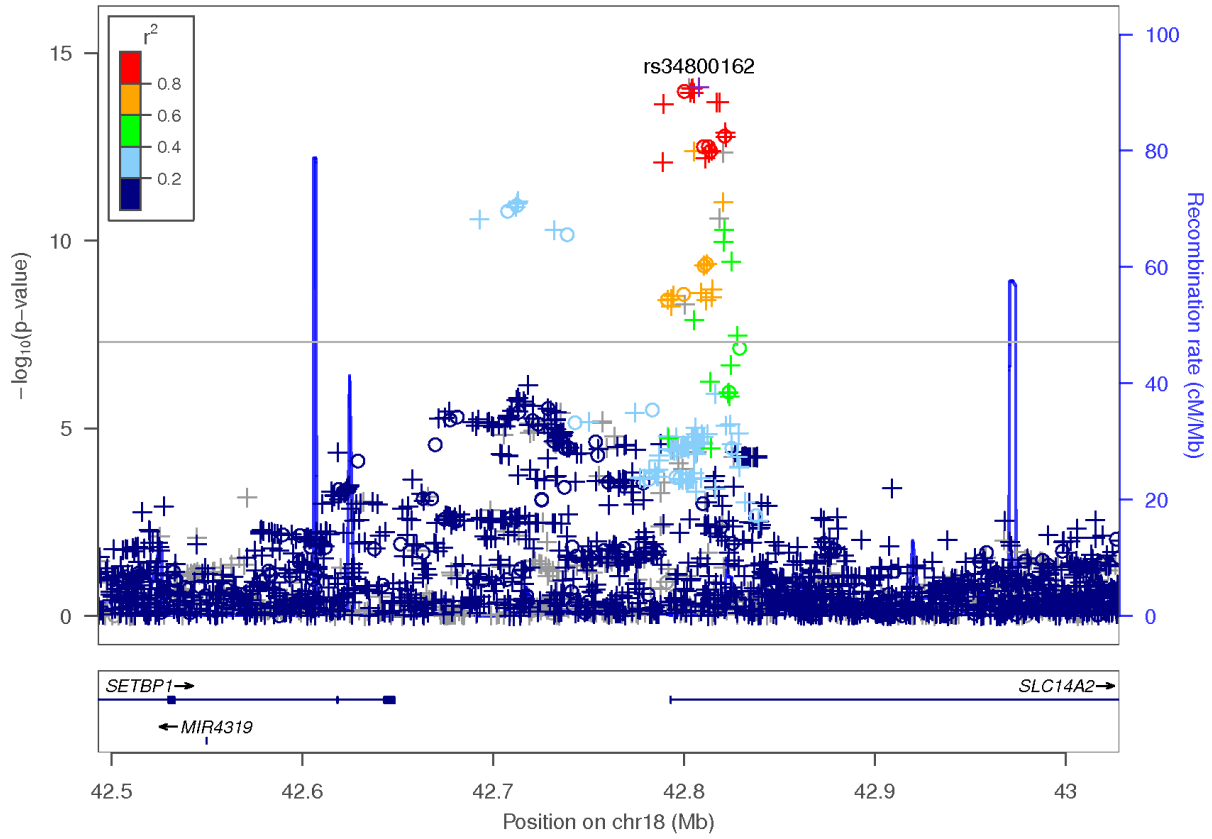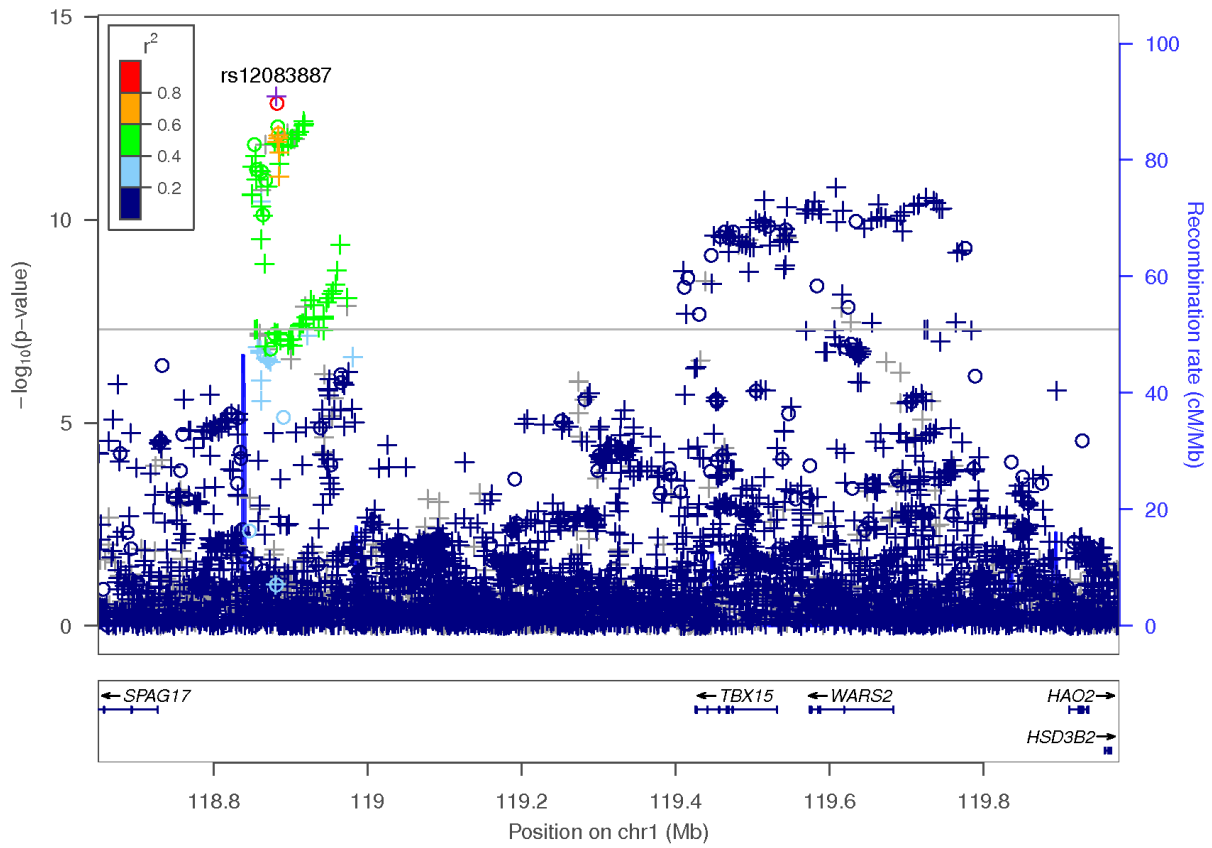

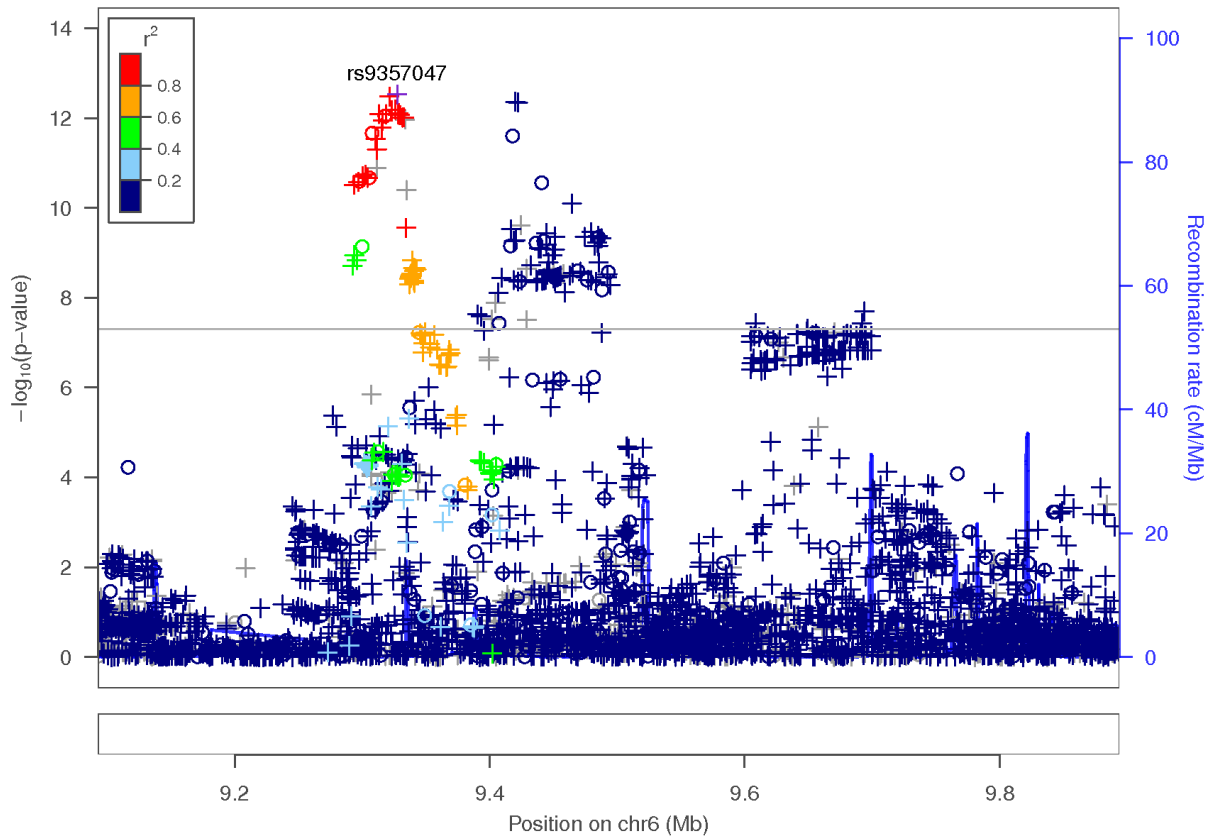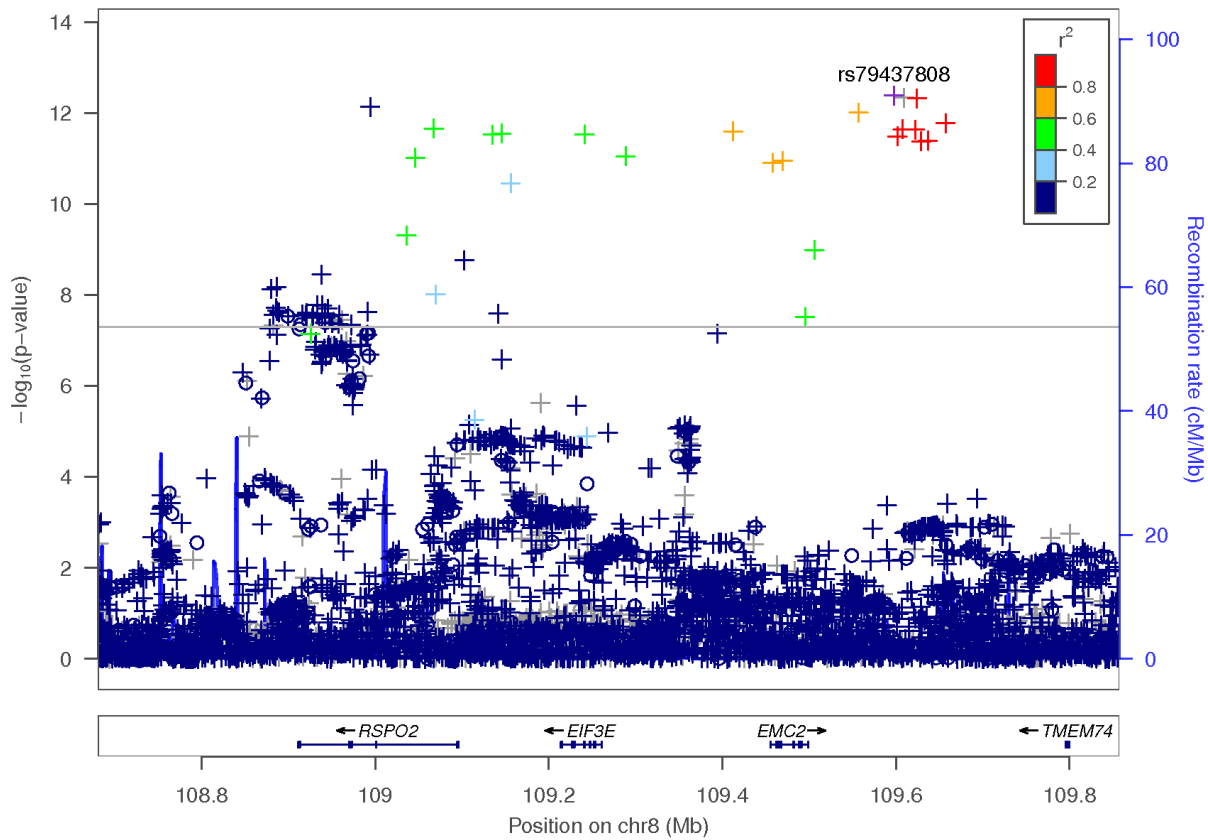

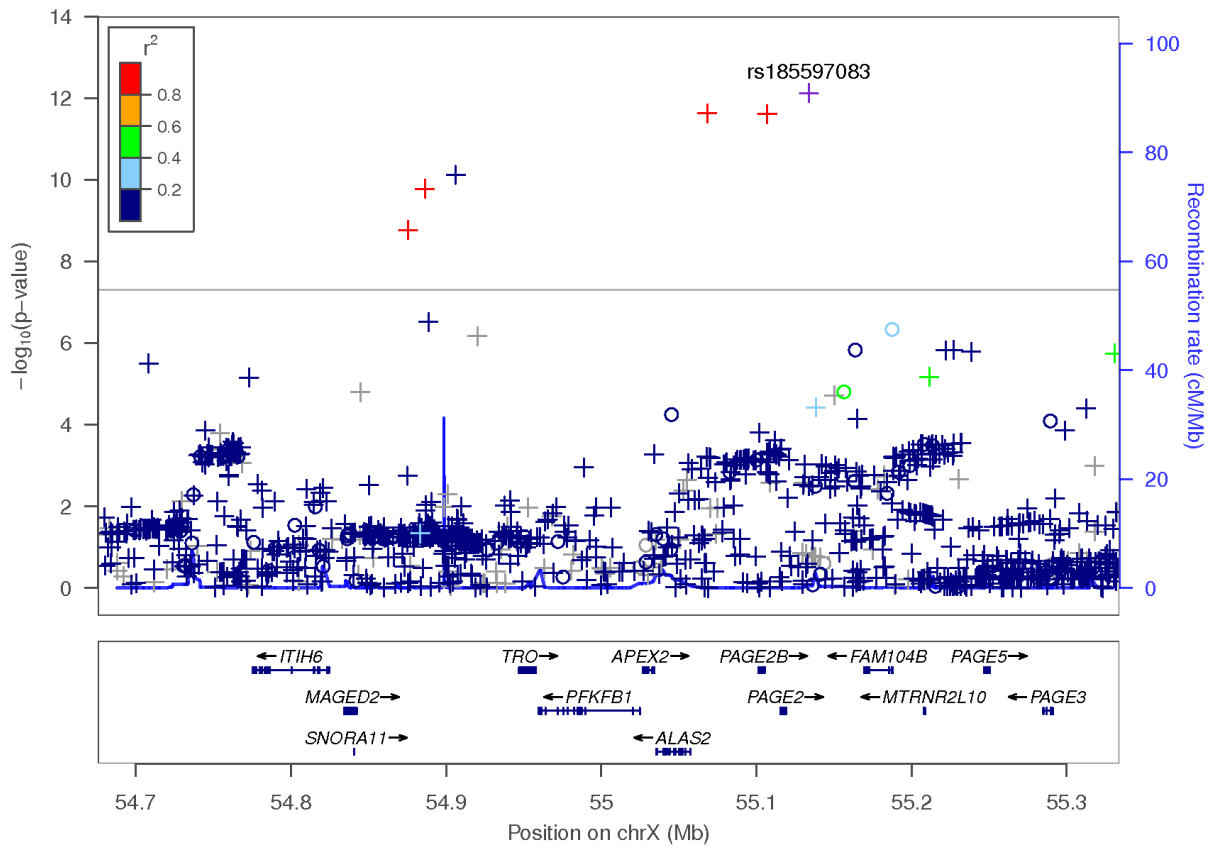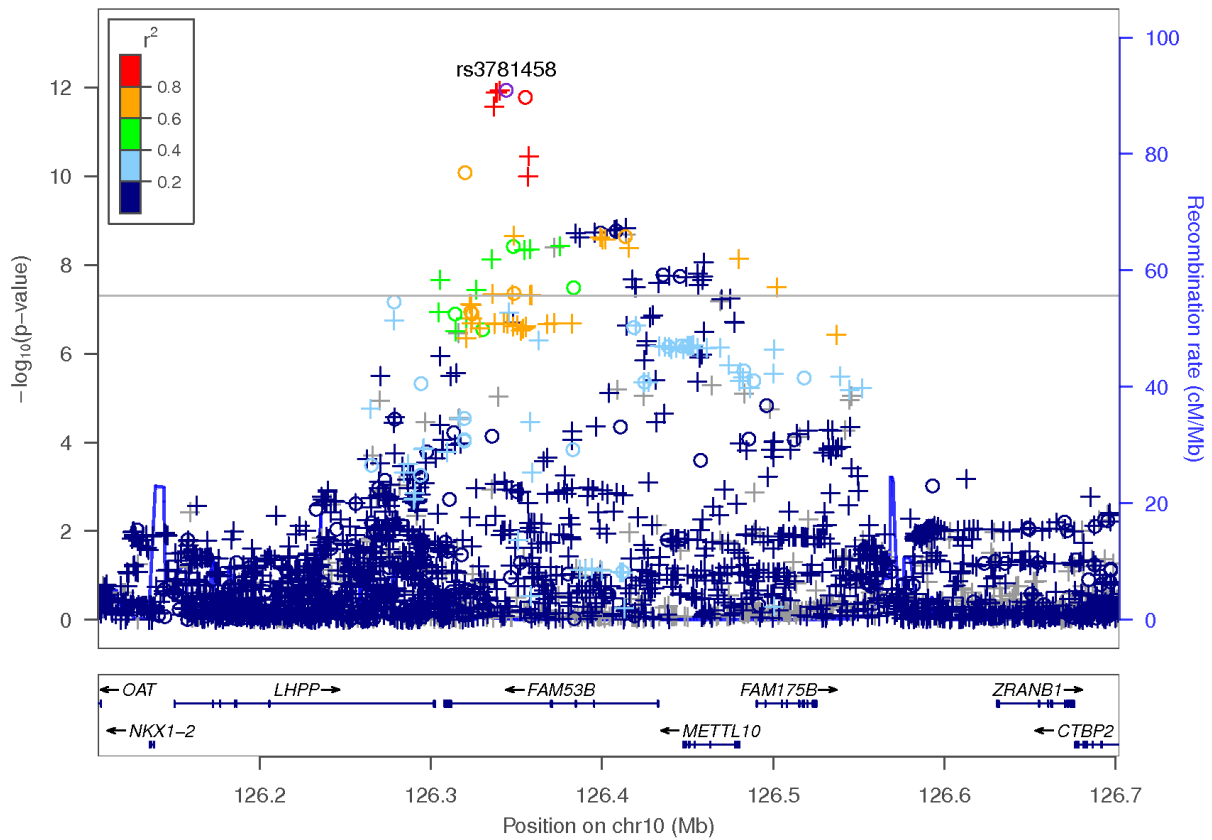



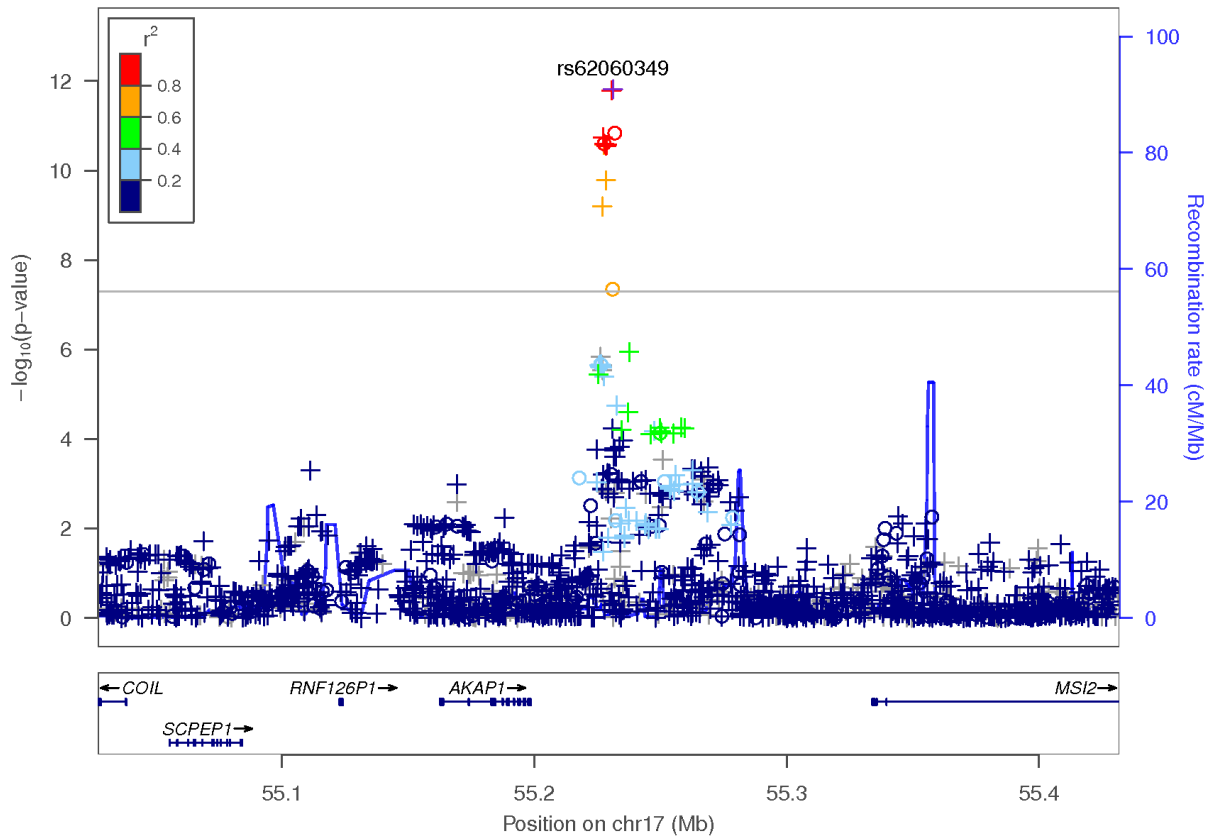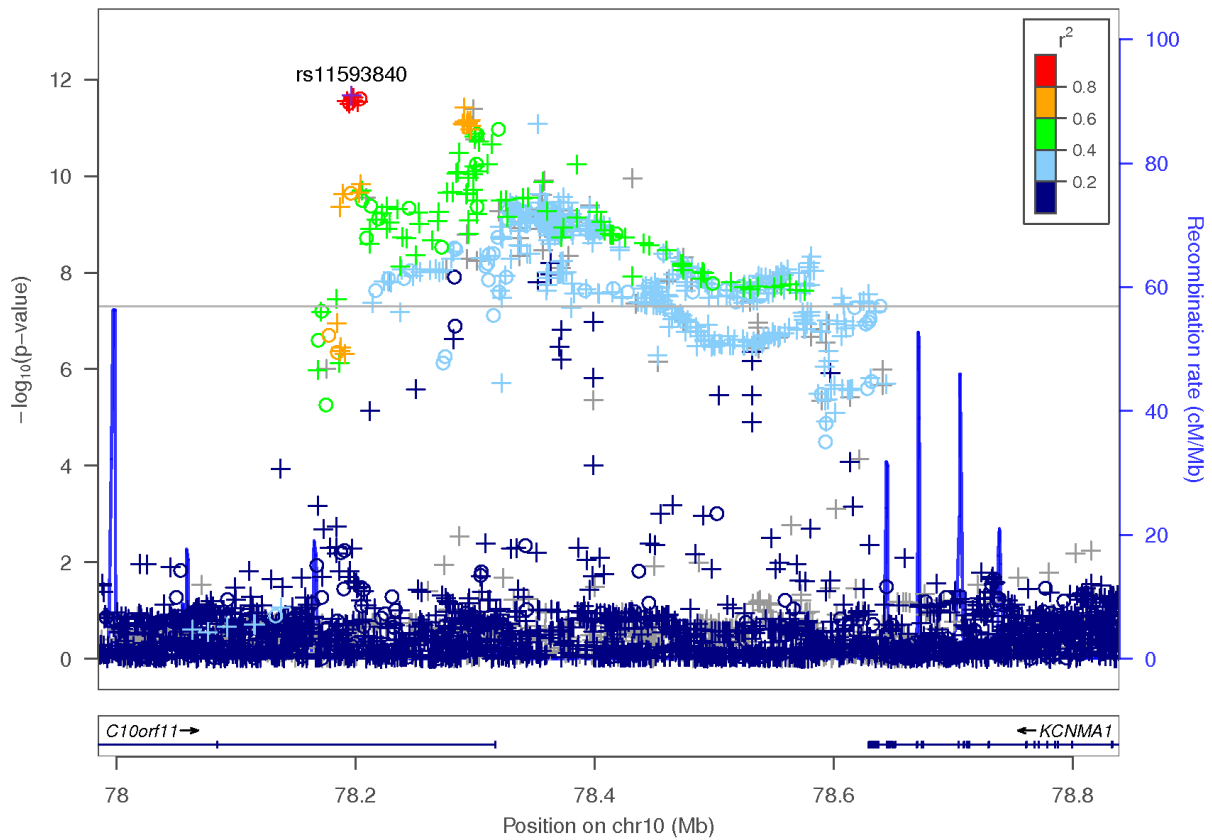

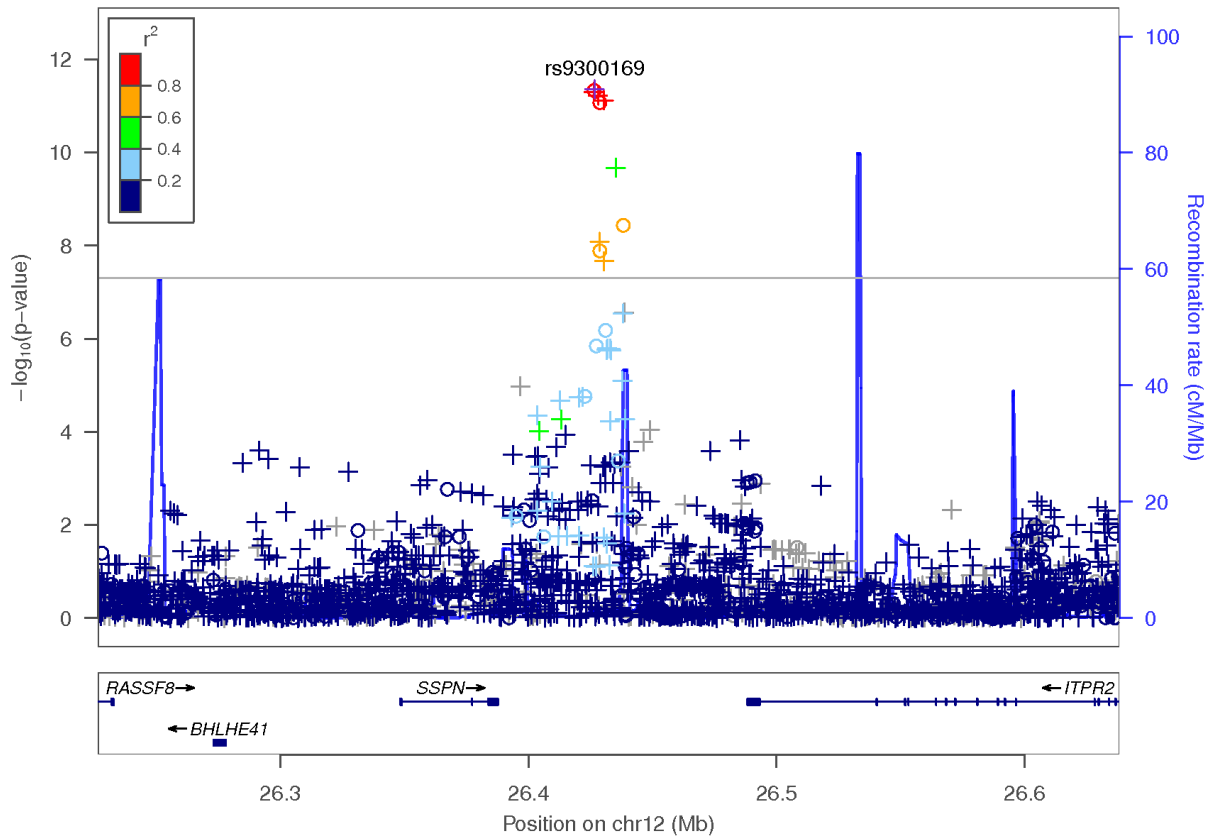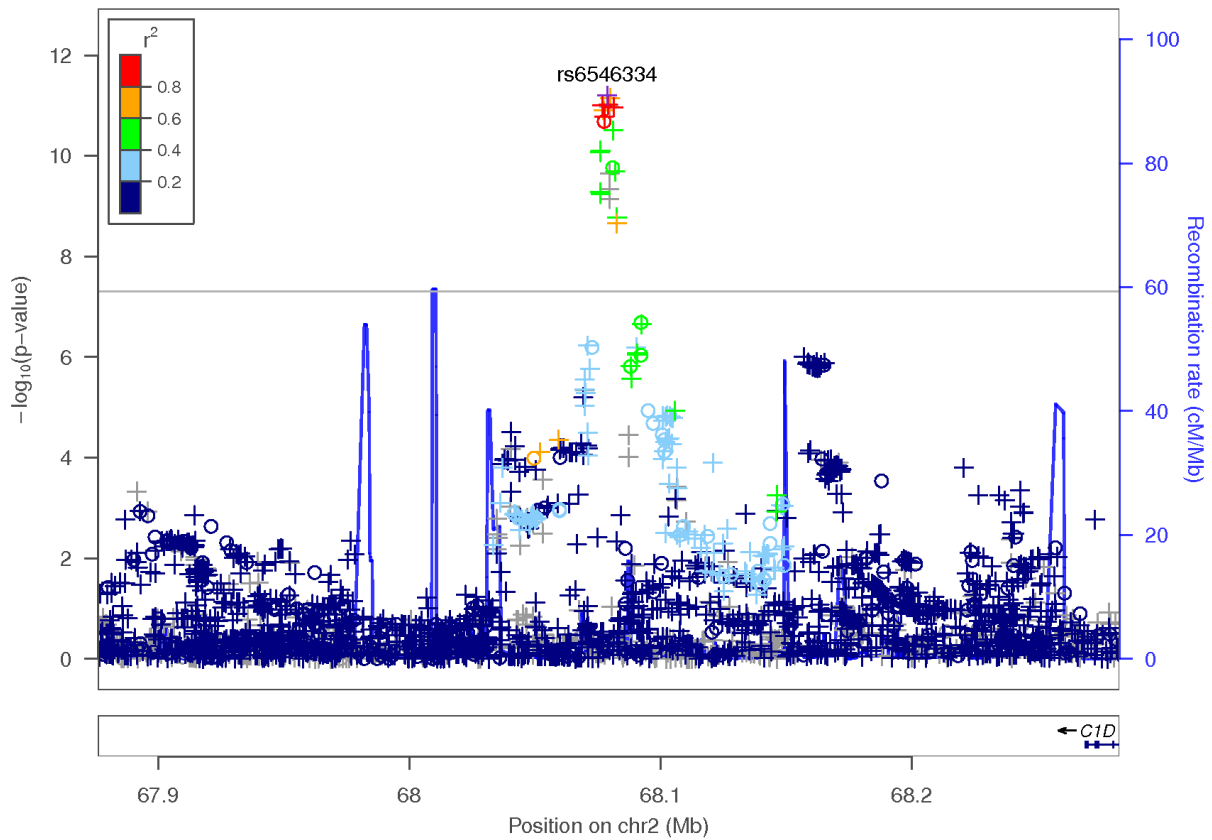

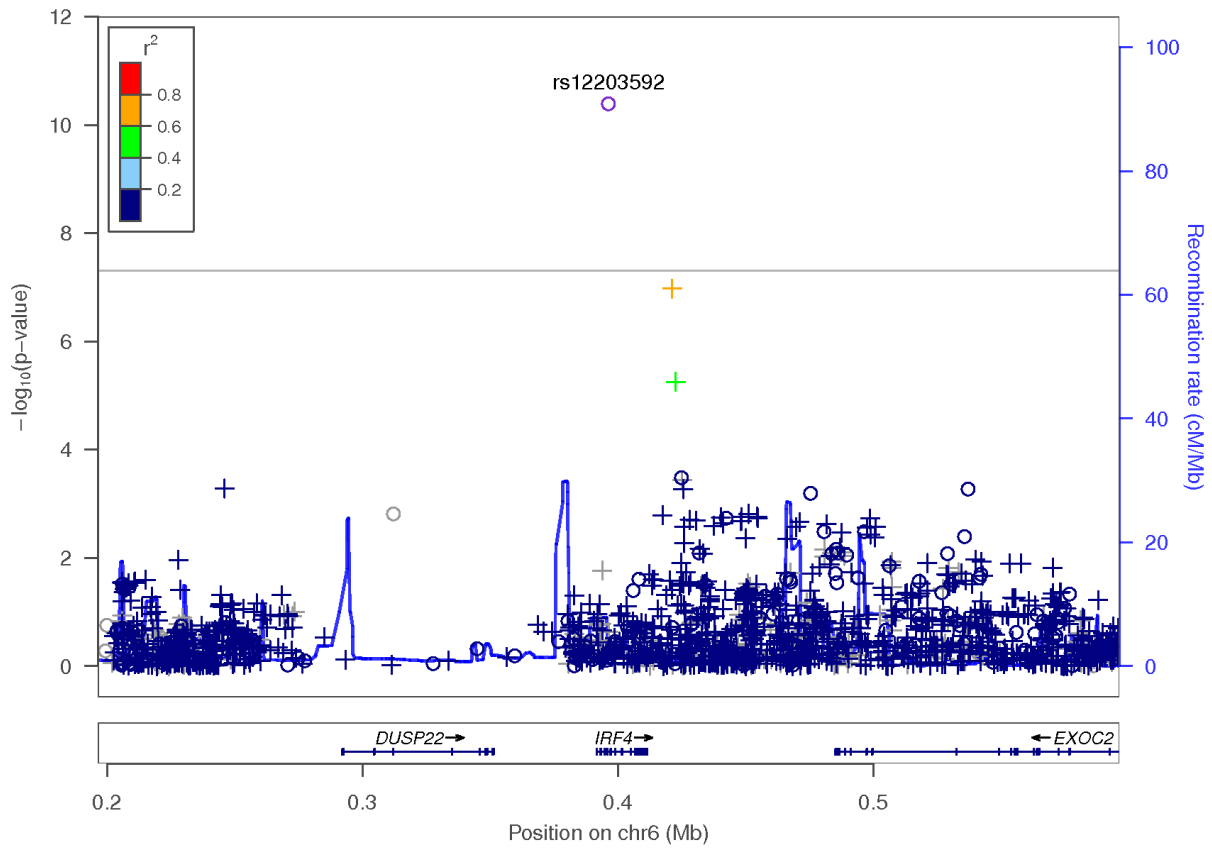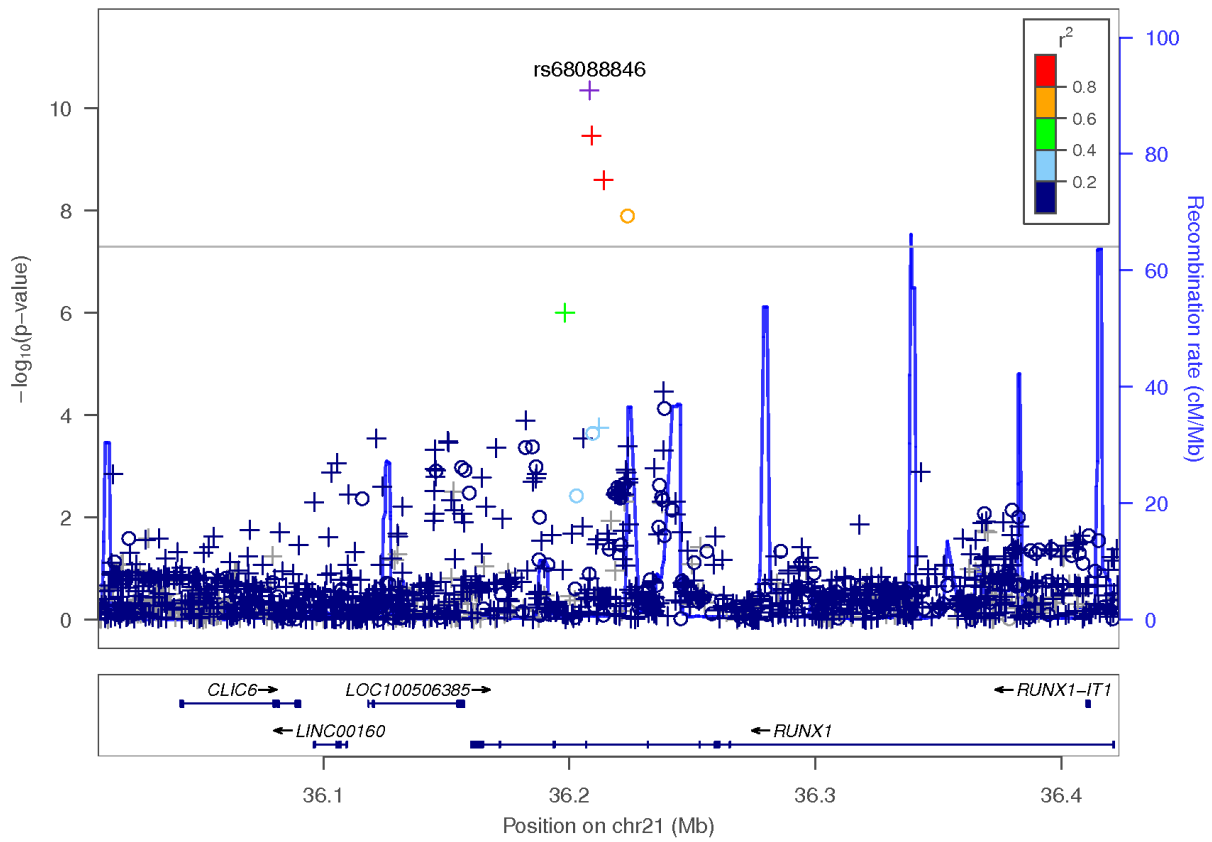

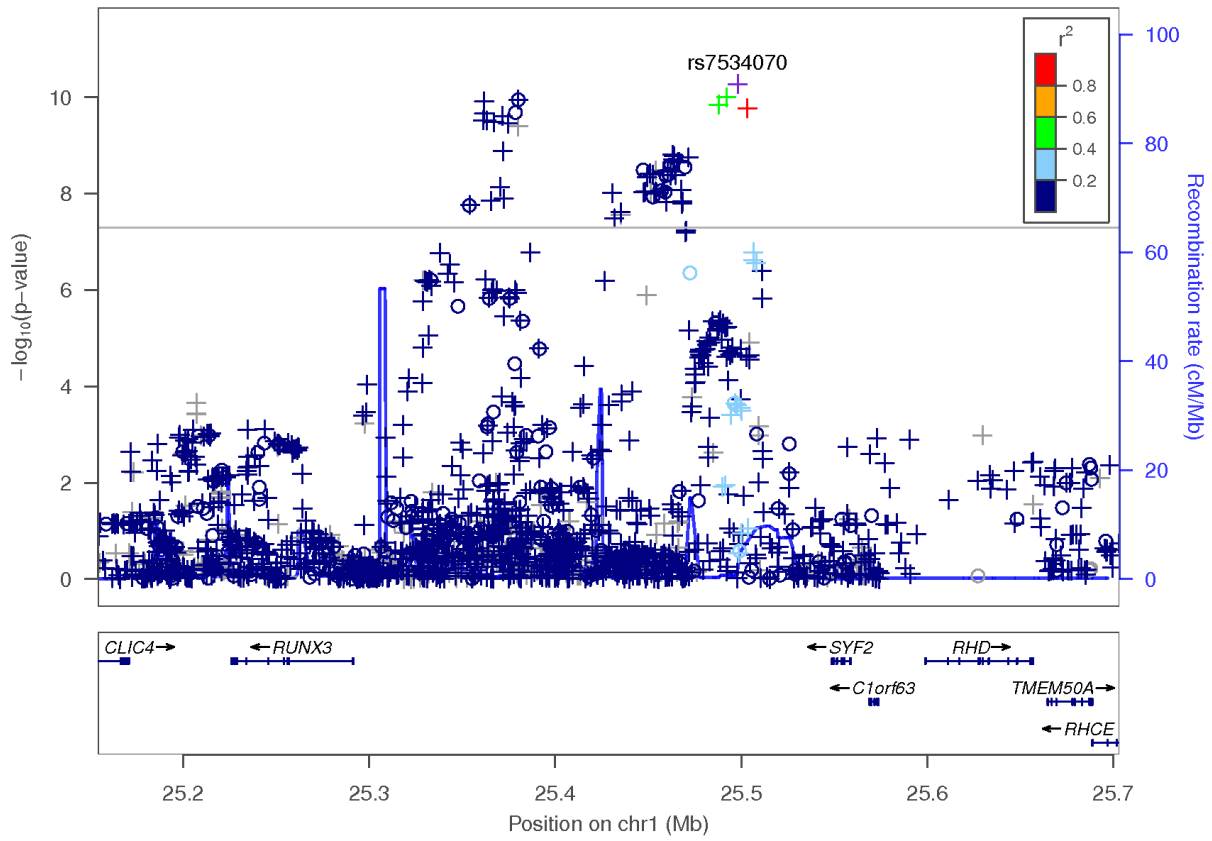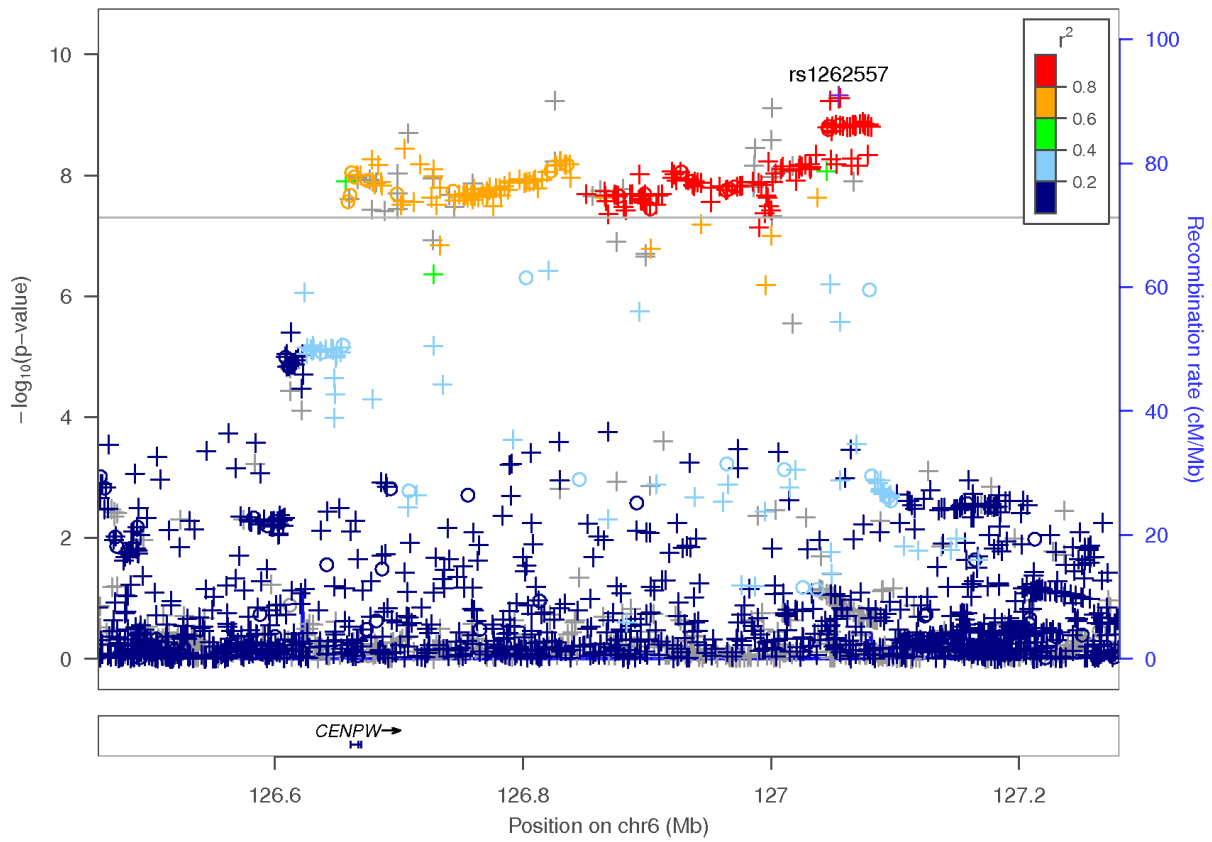

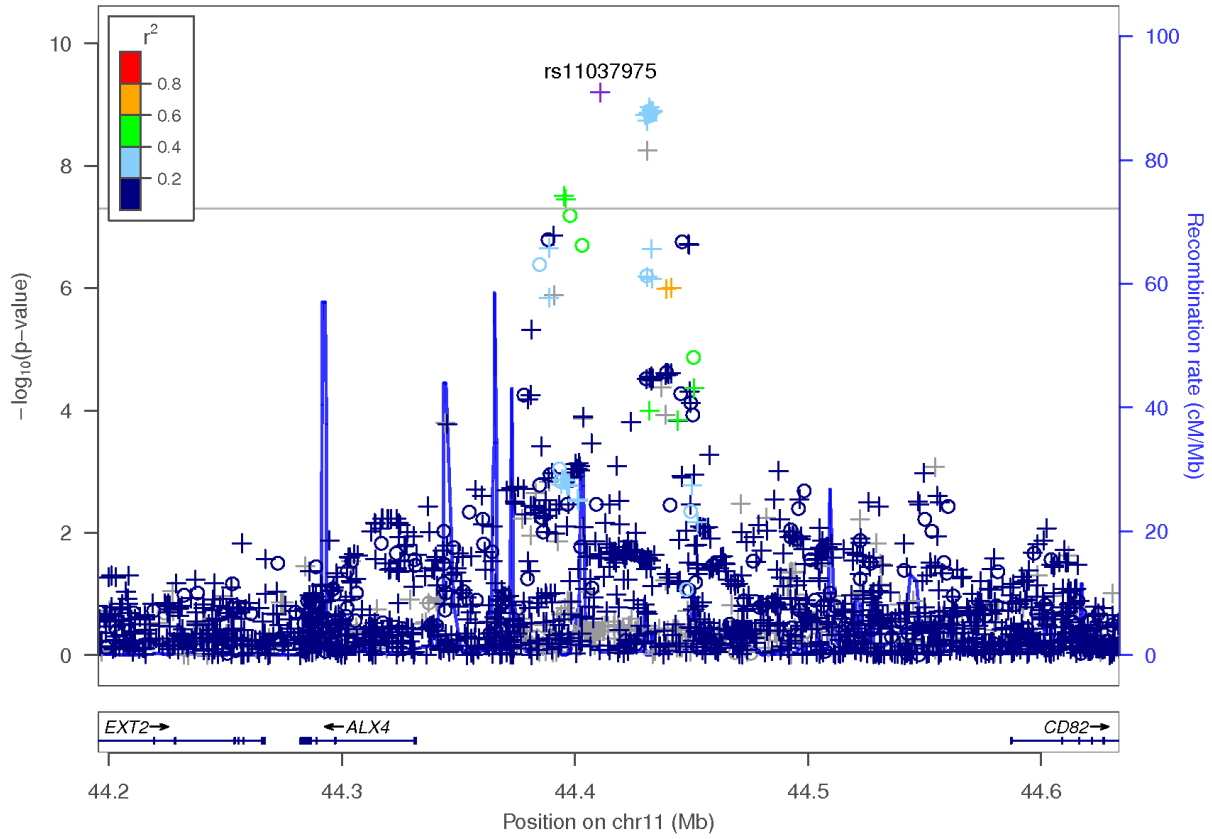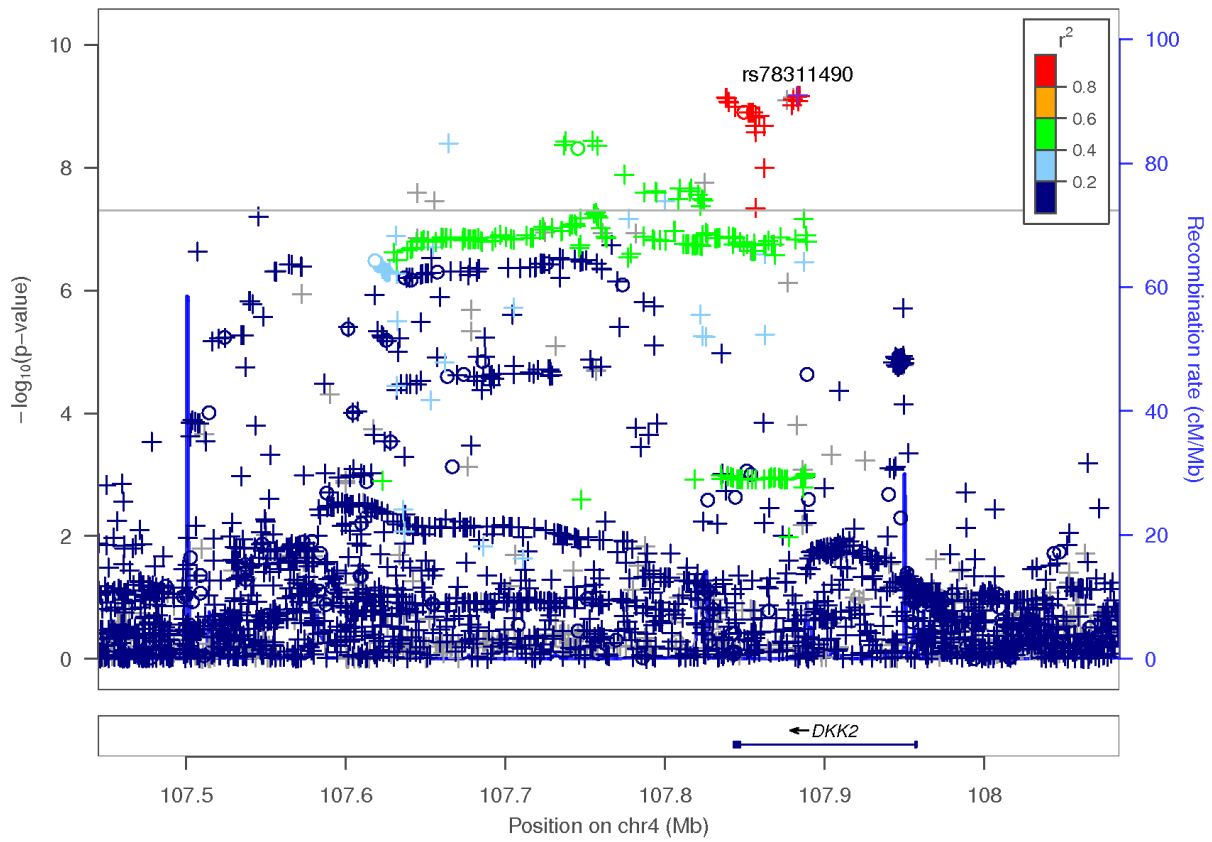

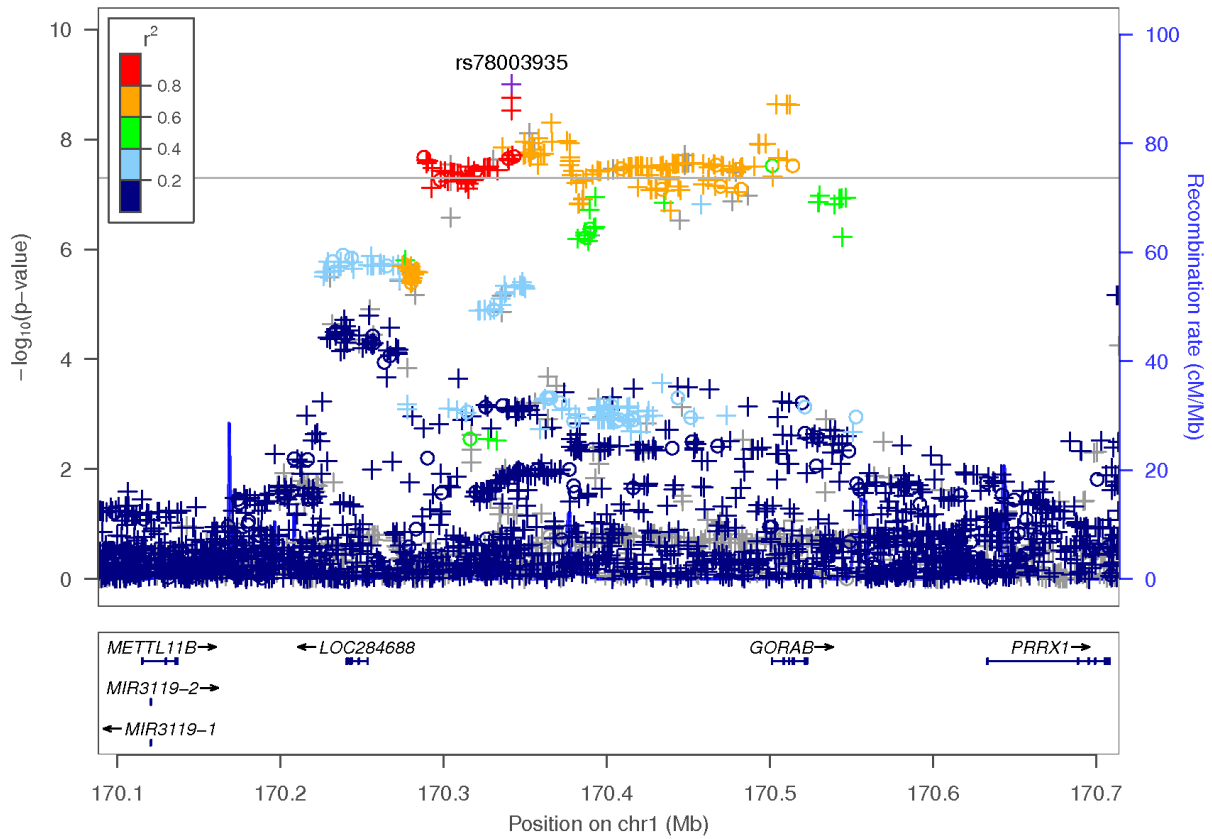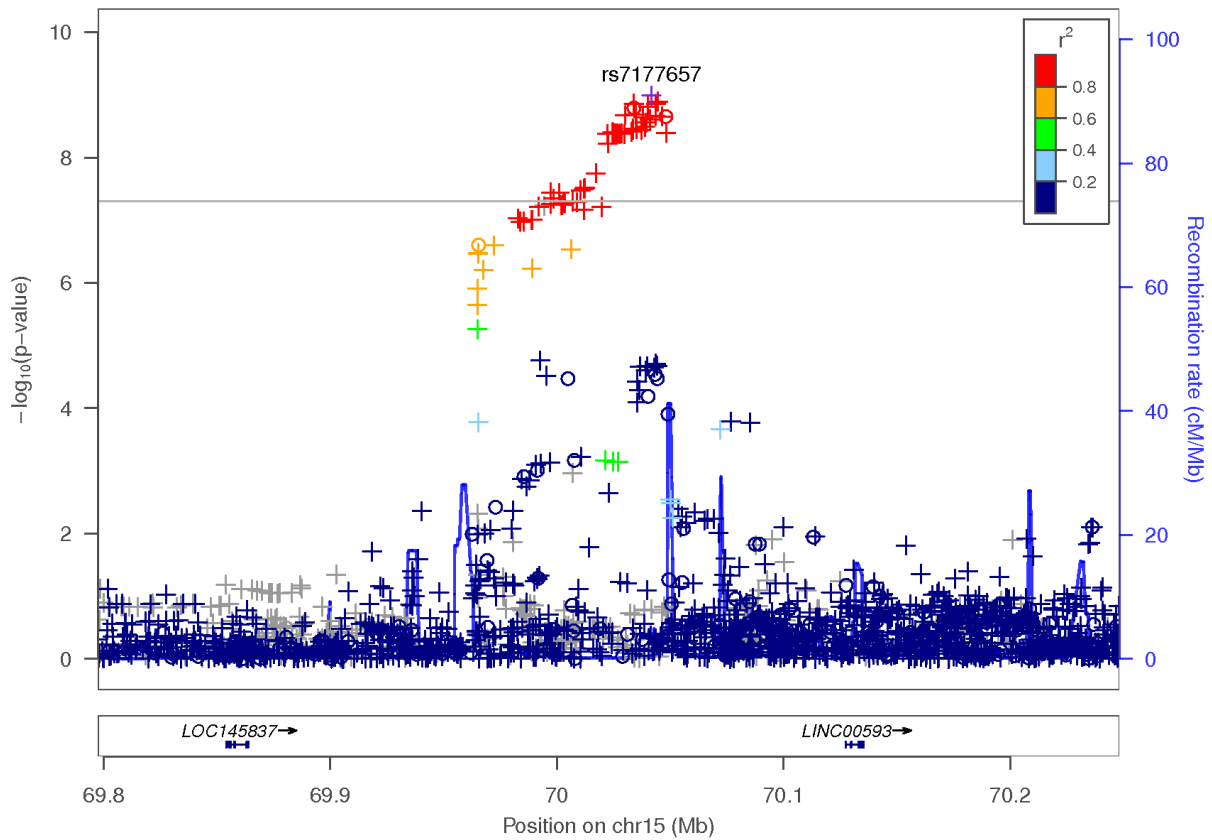

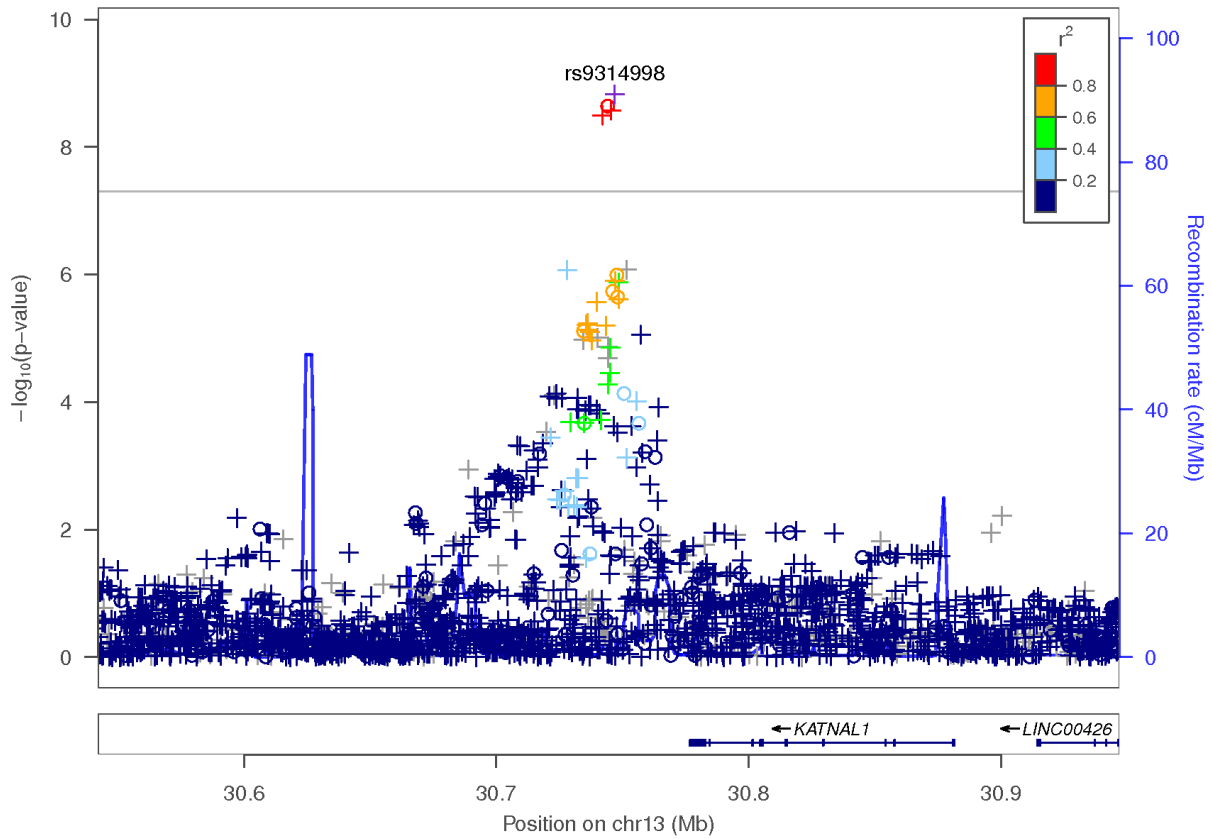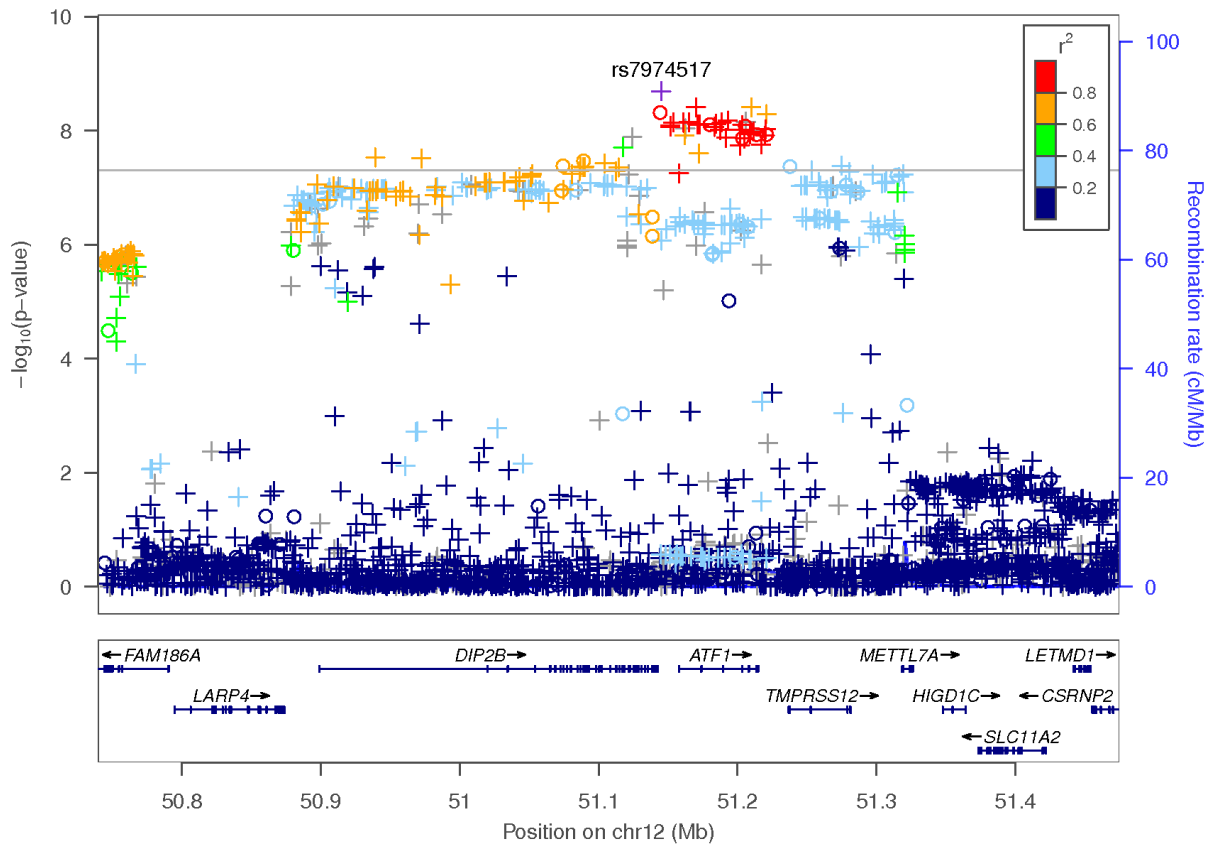

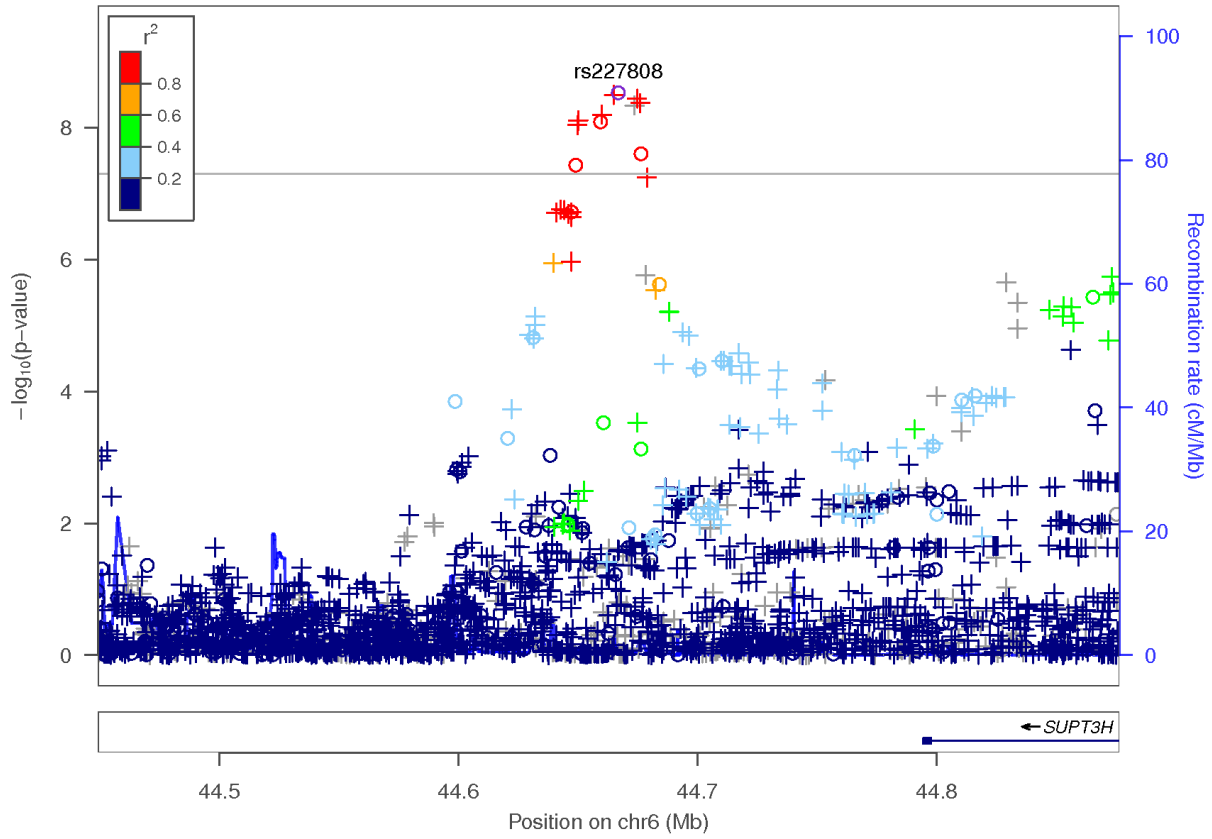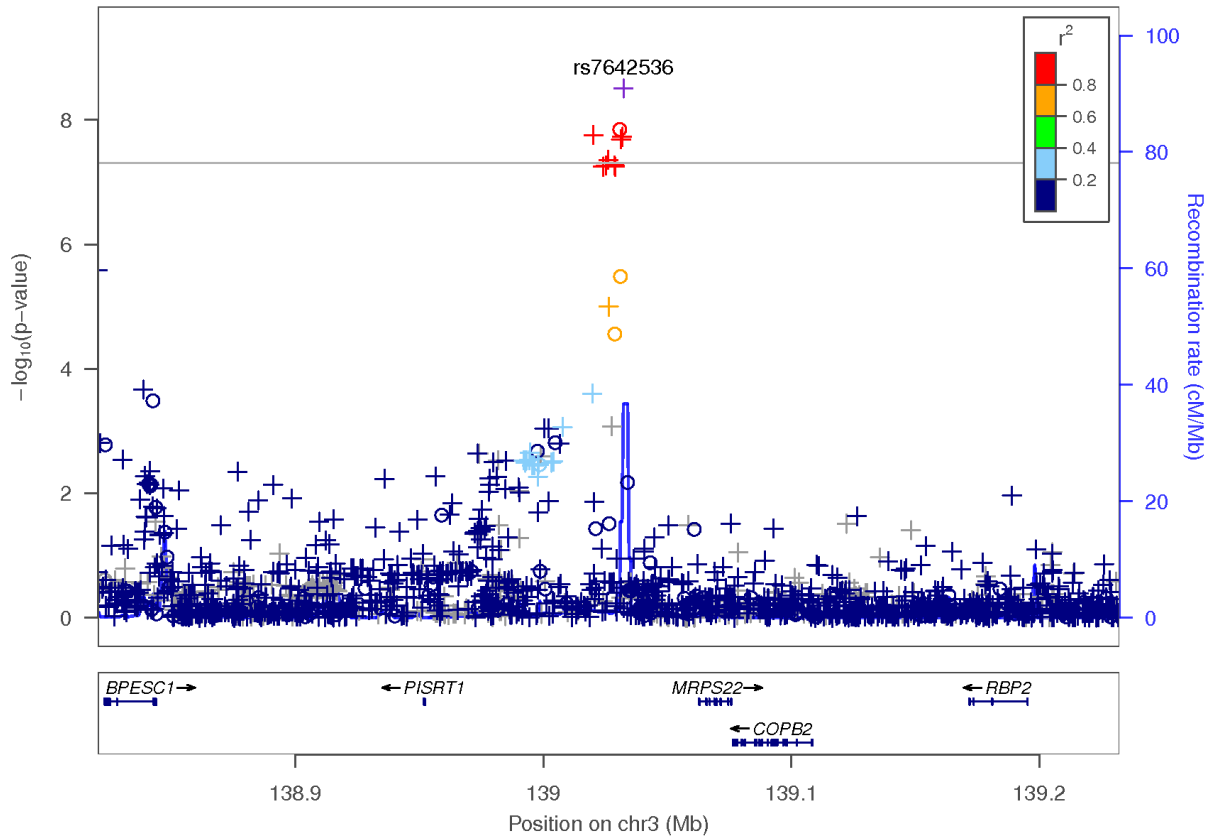



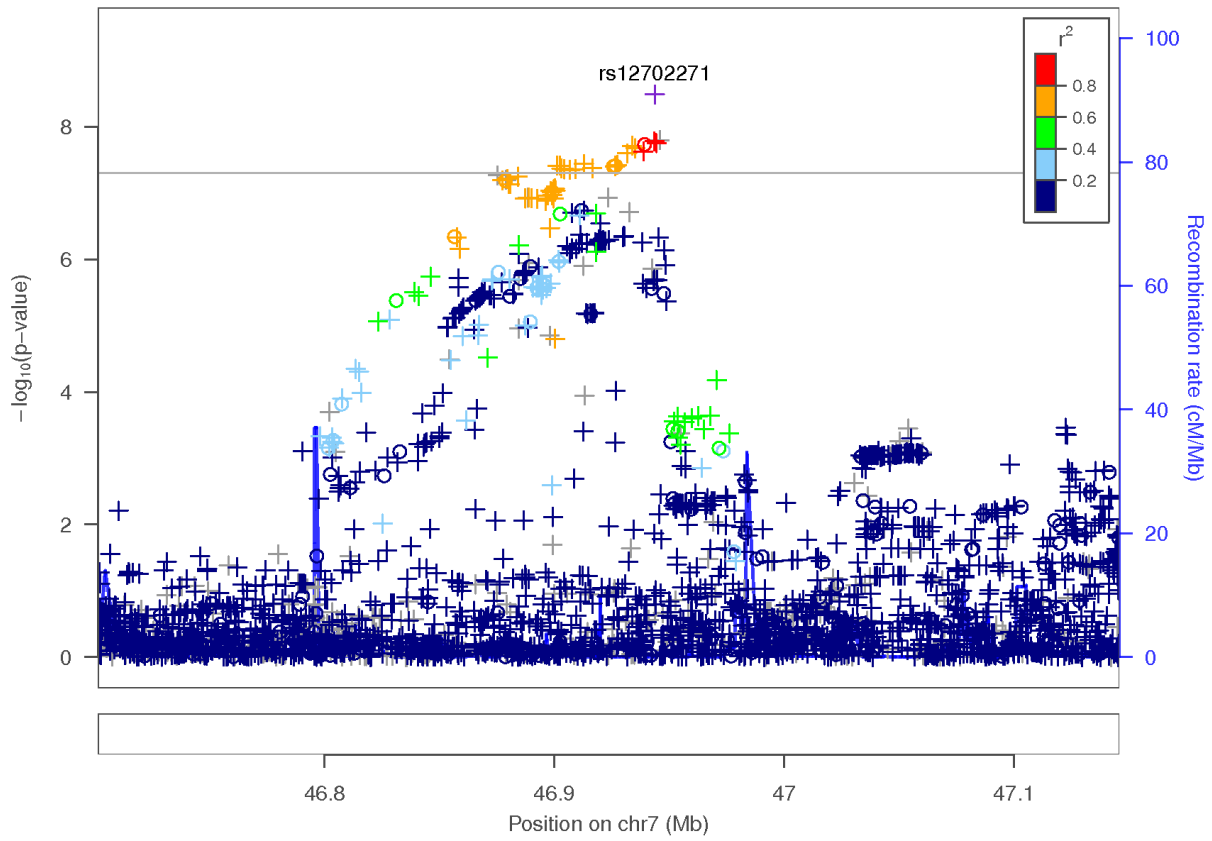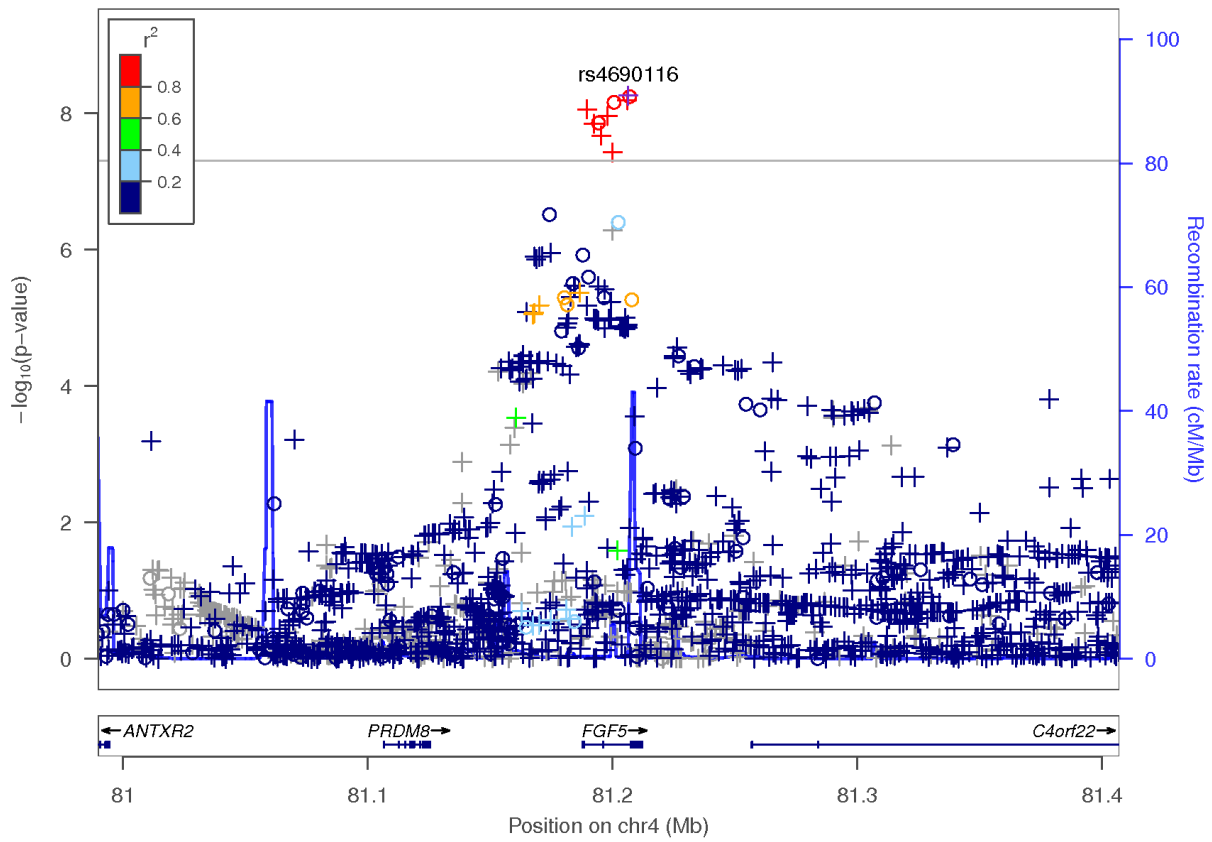

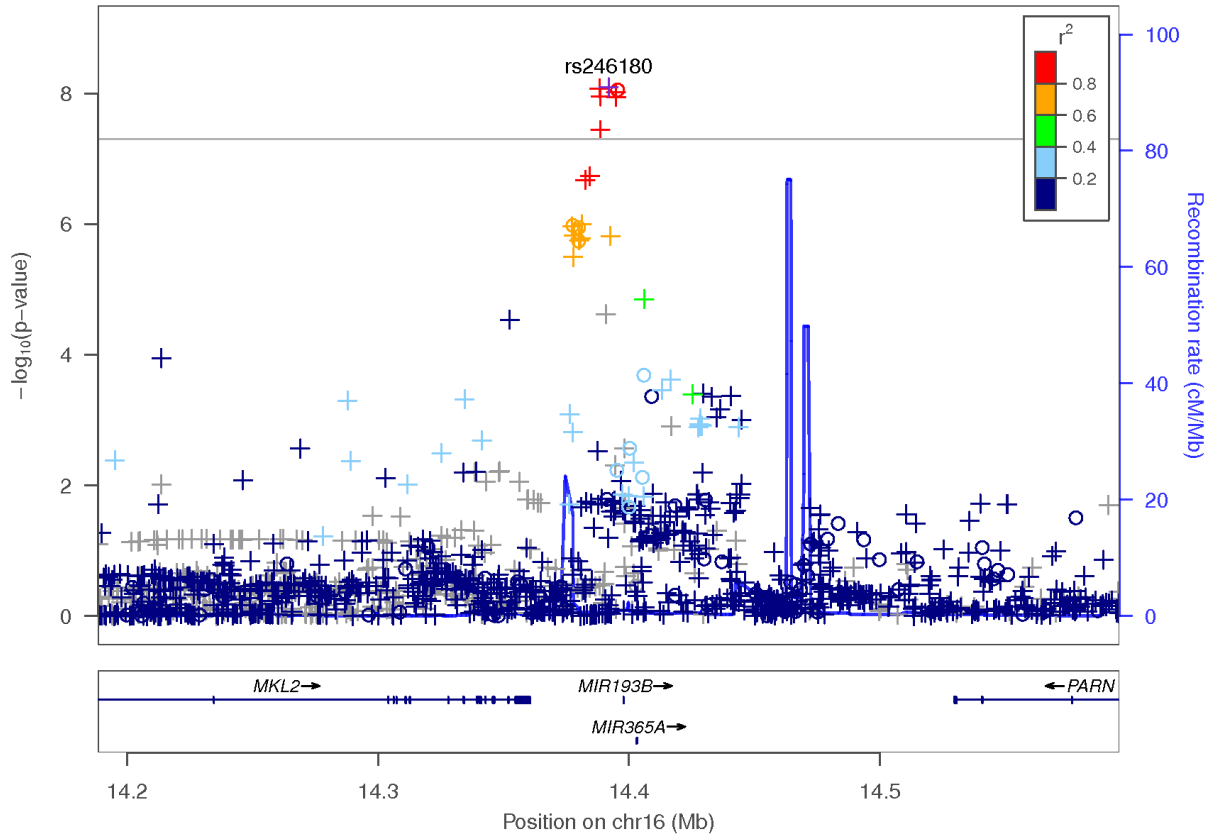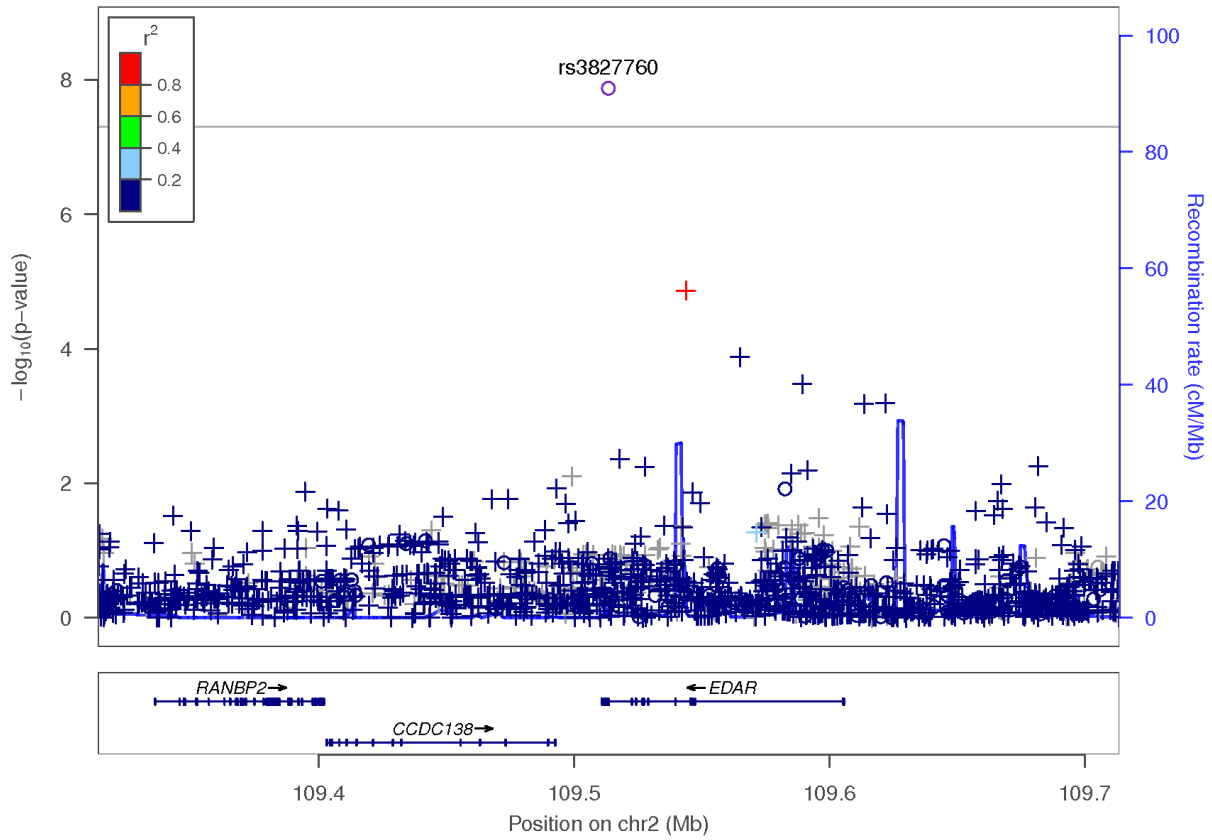

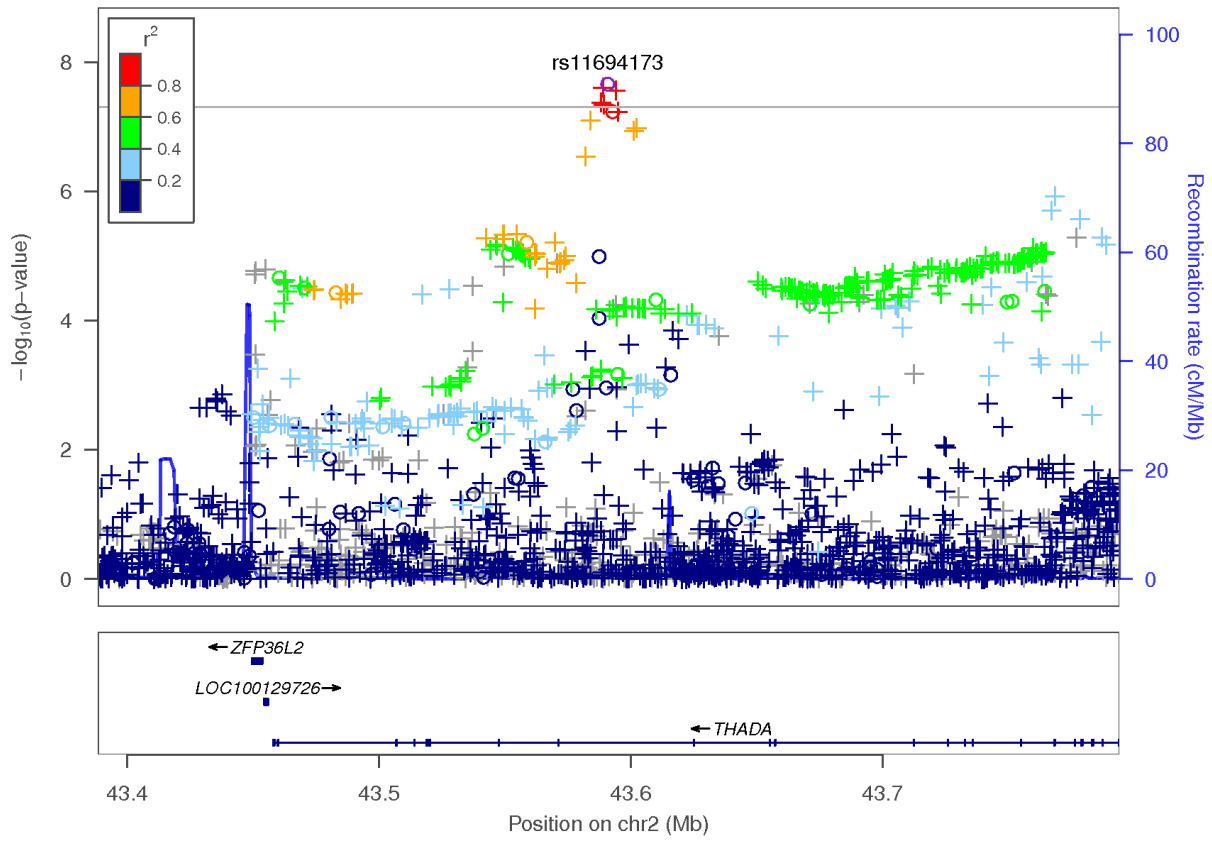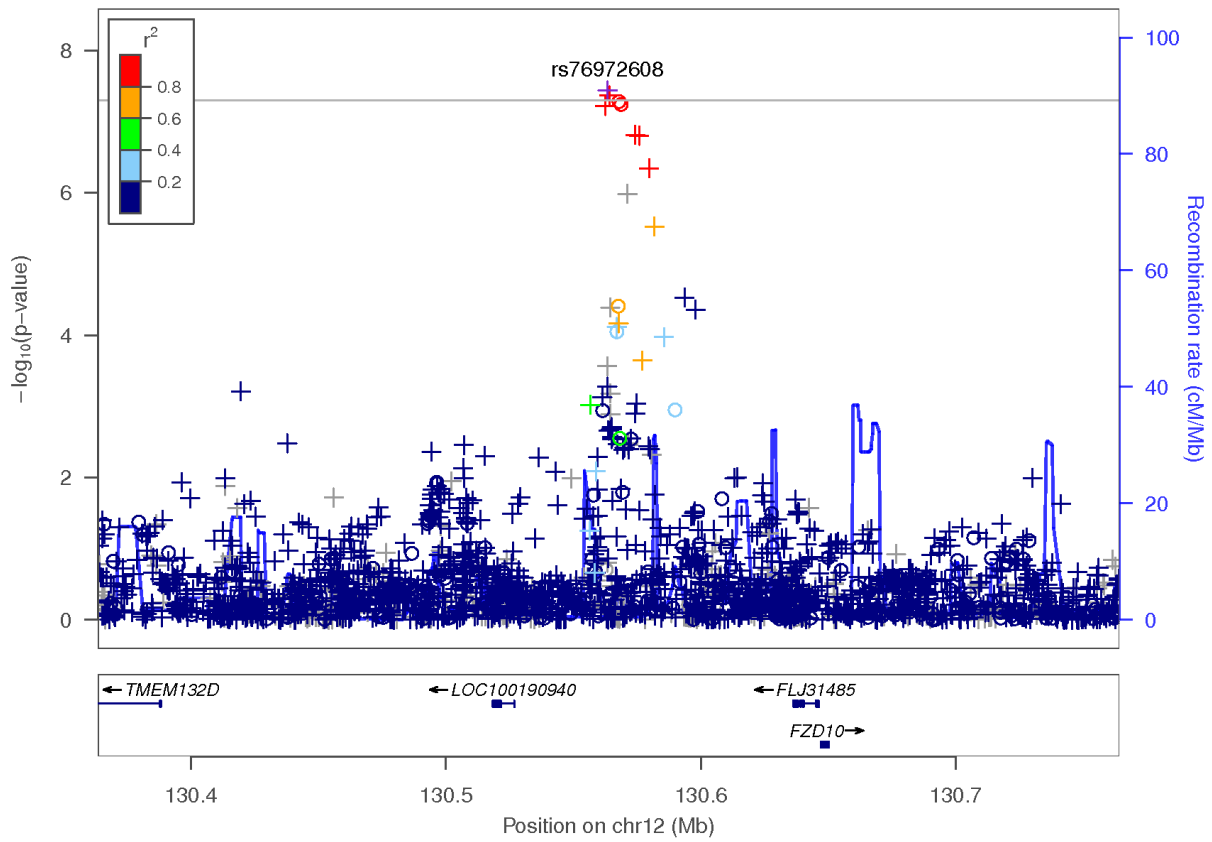

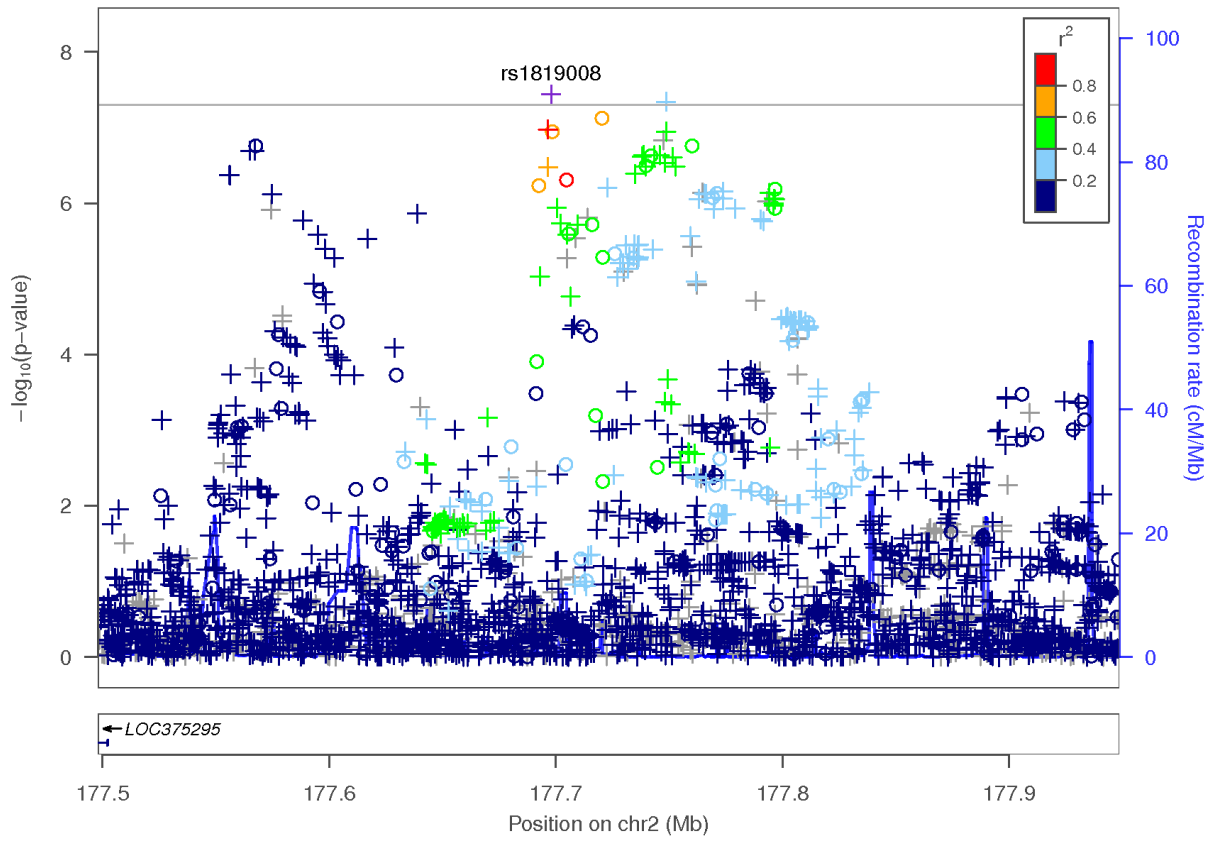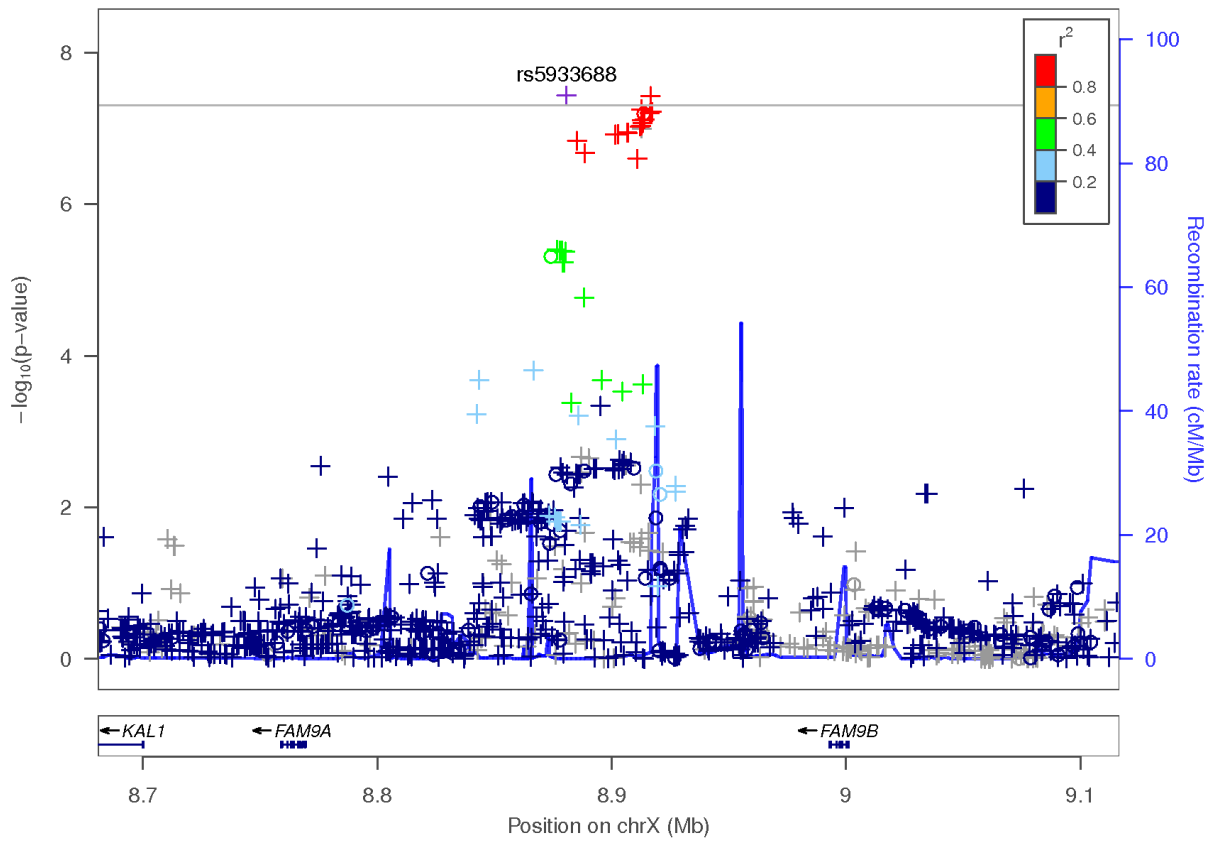

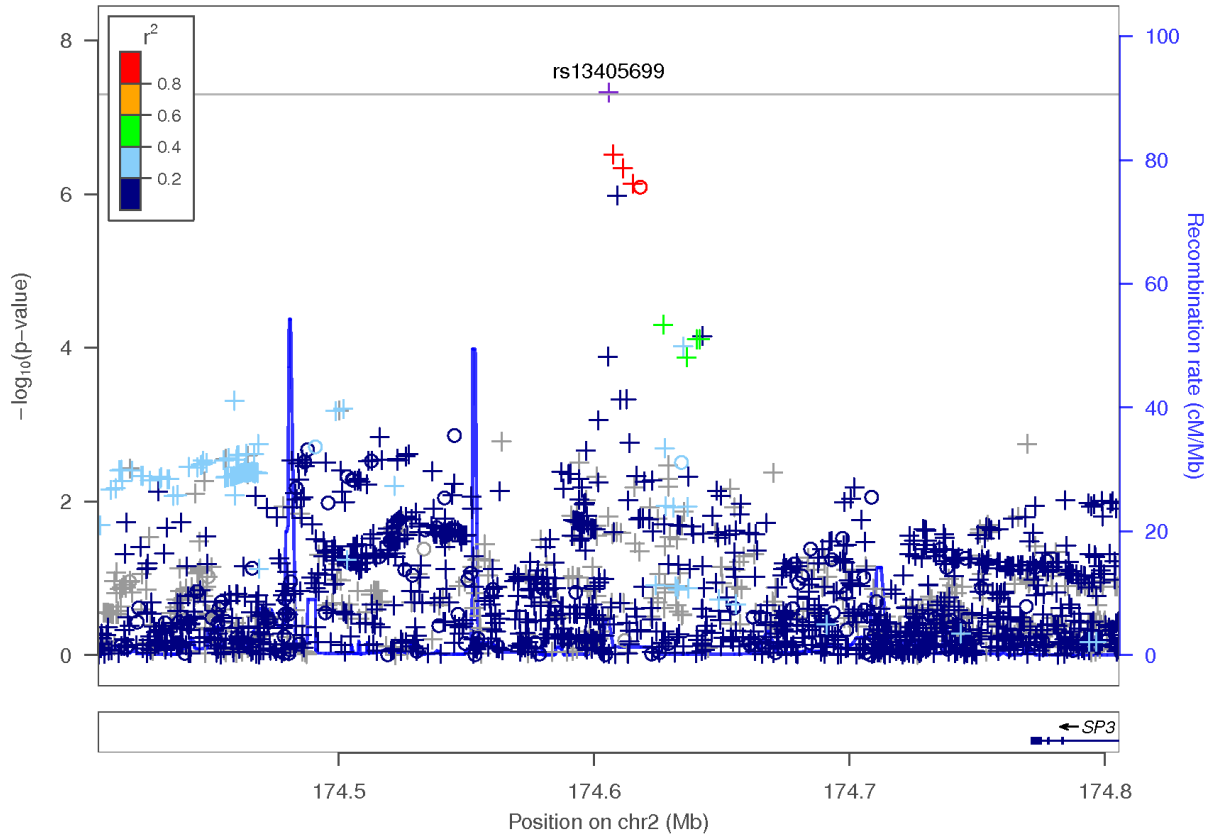

Supplement: NIHMS780506-supplement-11.pdf [file NIHMS780506-supplement-11.pdf]
