# Supplementary material
Source: PubMed Central journal article supplement (PMC5207801)

# Analysis Summary: Migraine

## Phenotype Description

Migraine cases were defined as saying "Yes" or reporting migraines to at least one of the following questions:

- Headaches ("Has a doctor or other medical professional ever diagnosed you with migraines?")
- Your Medical History ("Have you ever been diagnosed by a doctor with migraine headaches with aura?")
- Your Medical History ("have you ever been diagnosed by a doctor with migraine headaches without aura?")
- Roots into the Future: Health History ("Has a doctor ever told you that you have any of these conditions?")
- Your Health Profile ("Have you ever been diagnosed or treated for any of the following conditions?")
- Research Snippet ("Have you ever suffered from migraines?")
- Your Profile and Health History ("Have you ever been diagnosed with migraines?")

Controls were defined as saying "No" or not reporting migraines to at least one of the questions above. Respondents with discordant answers were removed.

## Phenotype Statistics

The following table shows demographics of unrelated, European individuals included in the GWAS.

| Phenotype          | Group   | Total  | M      | F     | (0,30] | (30,45] | (45,60] | (60,Inf] |
|--------------------|---------|--------|--------|-------|--------|---------|---------|----------|
| migraine_diagnosis | case    | 53109  | 15919  | 37190 | 6331   | 15835   | 16378   | 14565    |
|                    | control | 230876 | 136087 | 94789 | 32204  | 66587   | 61262   | 70823    |

The following table shows the phenotypic distribution across 23andMe genotyping platforms for individuals included in the GWAS.

| Phenotype          | Group   | Total  | v1/v2 | v3     | v4    |
|--------------------|---------|--------|-------|--------|-------|
| migraine_diagnosis | case    | 53109  | 2927  | 39121  | 11061 |
|                    | control | 230876 | 14299 | 170530 | 46047 |

## Null Model with Covariates

The following table shows results of fitting a model for the trait based on just the covariates. Principal coordinates have been standardized, so these effect sizes are in units of standard deviations.

|      | Estimate | Std. Error | z value | Pr(> z )              | LRT     | Pr(>Chi)              |
|------|----------|------------|---------|-----------------------|---------|-----------------------|
| age  | -0.00371 | 0.000307   | -12.1   | $9.9 \times 10^{-34}$ | 146.8   | $8.6 \times 10^{-34}$ |
| sexF | 1.21394  | 0.010403   | 116.7   | 0.0                   | 14785.7 | 0.0                   |
| pc.0 | 0.02773  | 0.005122   | 5.4     | $6.2 \times 10^{-8}$  | 29.7    | $5.0 \times 10^{-8}$  |
| pc.1 | -0.06721 | 0.005193   | -12.9   | $2.6 \times 10^{-38}$ | 172.8   | $1.8 \times 10^{-39}$ |
| pc.2 | -0.05422 | 0.005207   | -10.4   | $2.2 \times 10^{-25}$ | 110.2   | $8.9 \times 10^{-26}$ |
| pc.3 | 0.01750  | 0.005010   | 3.5     | 0.00048               | 12.2    | 0.00048               |
| pc.4 | 0.01950  | 0.005137   | 3.8     | 0.00015               | 14.7    | 0.00013               |

## SNP-level QC information

The following table shows results for QC filters on the genotyped data:

|                         | failed | passed  |
|-------------------------|--------|---------|
| no filters              | 0      | 1030430 |
| not V1-only, chrM, chrY | 4790   | 1025640 |
| parent-offspring test   | 2129   | 1023511 |
| MAF > 0%                | 3203   | 1020494 |
| HWE > 1e-20             | 48225  | 972832  |
| gt.rate > 90%           | 30775  | 952826  |
| batch effects           | 28267  | 945446  |

The following table shows results for QC filters on the imputed dosage data:

|            | failed | passed   |
|------------|--------|----------|
| no filters | 0      | 13733809 |
| MAF > 0%   | 0      | 13733809 |

imputation quality      0 13733809  
 batch effects            2168 13731641

The following table shows results for QC filters on the merged association test results:

|                    | passed   | total    |
|--------------------|----------|----------|
| imputed only       | 12833621 | 12833621 |
| both passed        | 898002   | 13731623 |
| genotyped only     | 47444    | 13779067 |
| no test result     | -2274    | 13776793 |
| failed to converge | -13720   | 13763073 |

## Genetic Association Tests

We performed logistic regression assuming an additive model for allelic effects, using the model:

$$migraine\_diagnosis \sim age + sex + pc.0 + pc.1 + pc.2 + pc.3 + pc.4 + genotype$$

This genome-wide association analysis includes data from 53109 cases and 230876 controls of European ancestry, filtered to remove close relatives.

The results in this report have been adjusted for a genomic control inflation factor  $\lambda=1.167$ . The equivalent inflation factor for 1000 cases and 1000 controls  $\lambda_{1000}=1.002$ , and for 10000,  $\lambda_{10000}=1.019$ .

## Manhattan Plot

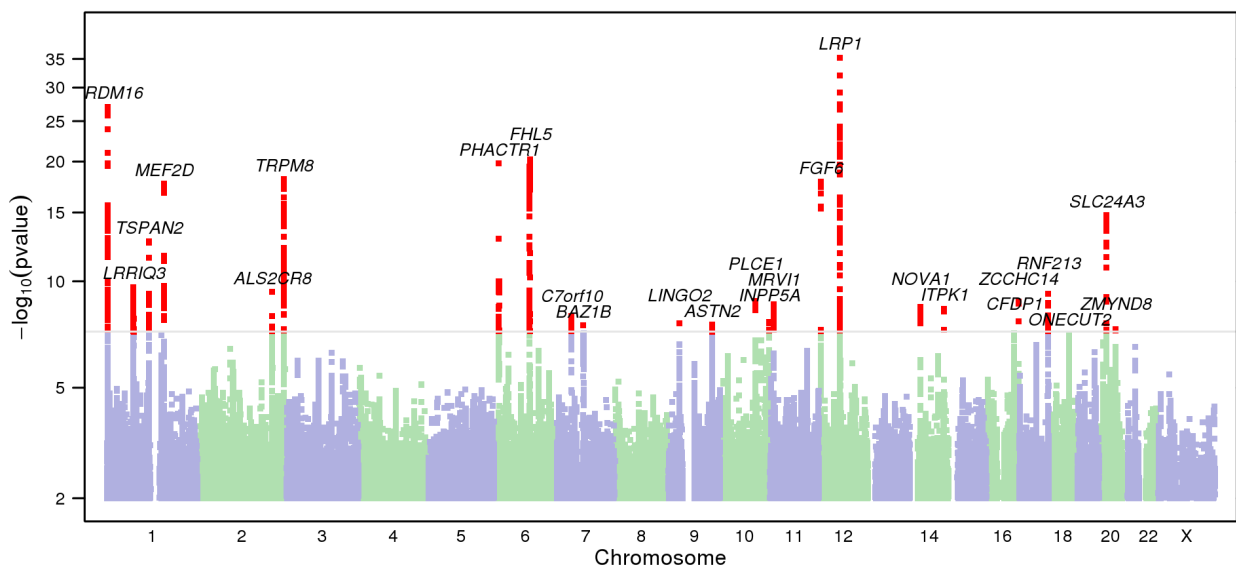

## Q-Q Plot of GWAS Results

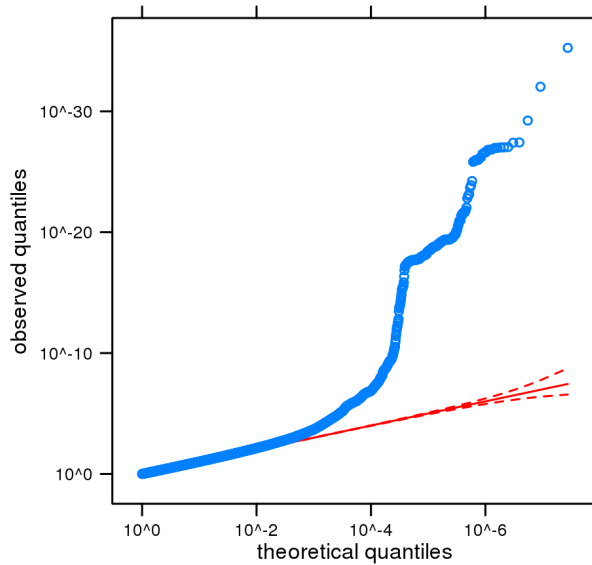

## Index SNPs for Strongest Associations

| cytoband | assay.name  | scaffold | position  | alleles | src | pvalue                | OR    | 95% CI        | gene.context      |
|----------|-------------|----------|-----------|---------|-----|-----------------------|-------|---------------|-------------------|
| 12q13.3  | rs11172113  | chr12    | 57527283  | C/T     | I   | $5.6 \times 10^{-36}$ | 1.102 | [1.086,1.120] | [LRP1]            |
| 1p36.32  | rs2075968   | chr1     | 3081241   | C/T     | I   | $9.0 \times 10^{-28}$ | 1.102 | [1.083,1.122] | [PRDM16]          |
| 6q16.1   | rs9486719   | chr6     | 97060124  | A/G     | I   | $5.7 \times 10^{-21}$ | 0.916 | [0.900,0.933] | [FHL5]            |
| 6p24.1   | rs9349379   | chr6     | 12903957  | A/G     | I   | $1.5 \times 10^{-20}$ | 0.931 | [0.917,0.945] | [PHACTR1]         |
| 2q37.1   | rs1965629   | chr2     | 234824731 | A/G     | I   | $7.3 \times 10^{-19}$ | 0.918 | [0.900,0.935] | MSL3P1--[]-TRPM8  |
| 12p13.32 | rs140668749 | chr12    | 4528671   | D/I     | I   | $1.3 \times 10^{-18}$ | 1.070 | [1.054,1.086] | FGF23--[]-FGF6    |
| 1q22     | rs2274319   | chr1     | 156450873 | C/T     | I   | $2.2 \times 10^{-18}$ | 1.072 | [1.056,1.089] | [MEF2D]           |
| 20p11.23 | rs6081613   | chr20    | 19465907  | A/G     | I   | $1.8 \times 10^{-15}$ | 0.935 | [0.920,0.951] | [SLC24A3]         |
| 1p13.2   | rs12134493  | chr1     | 115677946 | A/C     | I   | $2.1 \times 10^{-13}$ | 0.918 | [0.897,0.939] | TSPAN2--[]---NGF  |
| 1p31.1   | rs1923243   | chr1     | 73868386  | A/C     | I   | $2.2 \times 10^{-10}$ | 1.049 | [1.034,1.065] | []---LRR1Q3       |
| 2q33.2   | rs149163995 | chr2     | 203777226 | C/T     | I   | $4.4 \times 10^{-10}$ | 0.924 | [0.902,0.948] | [ALS2CR8]         |
| 17q25.3  | rs7220465   | chr17    | 78260011  | A/G     | I   | $5.2 \times 10^{-10}$ | 0.945 | [0.929,0.962] | [RNF213]          |
| 10q23.33 | rs11187838  | chr10    | 96038686  | A/G     | I   | $1.3 \times 10^{-9}$  | 1.047 | [1.032,1.063] | [PLCE1]           |
| 16q24.2  | rs8052831   | chr16    | 87578039  | A/G     | I   | $1.5 \times 10^{-9}$  | 1.049 | [1.033,1.066] | ZCCHC14--[]-JPH3  |
| 11p15.4  | rs4910165   | chr11    | 10674044  | C/G     | I   | $2.1 \times 10^{-9}$  | 1.050 | [1.033,1.067] | MRVI1[]--CTR9     |
| 14q12    | rs1245465   | chr14    | 27660859  | A/T     | I   | $2.9 \times 10^{-9}$  | 1.046 | [1.031,1.062] | NOVA1---[]        |
| 14q32.12 | rs11624776  | chr14    | 93595591  | A/C     | I   | $3.5 \times 10^{-9}$  | 0.953 | [0.938,0.968] | ITPK1--[]--MOAP1  |
| 7p14.1   | rs61693171  | chr7     | 40417731  | D/I     | I   | $8.7 \times 10^{-9}$  | 1.073 | [1.047,1.098] | [C7orf10]         |
| 10q26.3  | rs3793683   | chr10    | 134568387 | G/T     | I   | $1.7 \times 10^{-8}$  | 1.046 | [1.030,1.063] | [INPP5A]          |
| 9p21.1   | rs10156578  | chr9     | 29372501  | C/G     | I   | $2.0 \times 10^{-8}$  | 0.957 | [0.943,0.972] | LINGO2---[]       |
| 9q33.1   | rs7030607   | chr9     | 119245183 | A/G     | I   | $2.3 \times 10^{-8}$  | 1.046 | [1.029,1.062] | [ASTN2]           |
| 7q11.23  | rs202203062 | chr7     | 72857717  | D/I     | I   | $2.5 \times 10^{-8}$  | 1.061 | [1.039,1.083] | [BAZ1B]           |
| 20q13.12 | rs910187    | chr20    | 45841052  | A/G     | I   | $3.9 \times 10^{-8}$  | 1.045 | [1.029,1.061] | [ZMYND8]          |
| 16q23.1  | rs200914569 | chr16    | 75442144  | D/I     | I   | $5.7 \times 10^{-8}$  | 0.957 | [0.942,0.972] | [CFDP1]           |
| 18q21.31 | rs10871745  | chr18    | 55178810  | A/G     | I   | $6.2 \times 10^{-8}$  | 1.045 | [1.029,1.062] | ONECUT2--[]--FECH |

## Quality Statistics for Index SNPs

| assay.name  | is.v2 | is.v3 | is.v4 | gt.rate | hw.p.value | p.date | freq.b | avg.rsqr | min.rsqr | p.batch              | dose.b | qc.mask |
|-------------|-------|-------|-------|---------|------------|--------|--------|----------|----------|----------------------|--------|---------|
| rs11172113  | TRUE  | TRUE  | TRUE  | 0.9993  | 0.92       | 0.95   | 0.5989 | 0.9887   | 0.9853   | 0.12                 | 0.6022 | v2v3v4  |
| rs2075968   | FALSE | FALSE | FALSE |         |            |        |        | 0.9849   | 0.9777   | 0.86                 | 0.2353 | v2v3v4  |
| rs9486719   | FALSE | FALSE | FALSE |         |            |        |        | 0.9954   | 0.9919   | 0.30                 | 0.7947 | v2v3v4  |
| rs9349379   | TRUE  | TRUE  | TRUE  | 0.9997  | 0.94       | 0.56   | 0.4068 | 0.9935   | 0.9913   | 0.65                 | 0.4074 | v2v3v4  |
| rs1965629   | FALSE | FALSE | FALSE |         |            |        |        | 0.9995   | 0.9969   | 1.0                  | 0.1915 | v2v3v4  |
| rs140668749 | FALSE | FALSE | FALSE |         |            |        |        | 0.9688   | 0.9502   | 0.035                | 0.4685 | v2v3v4  |
| rs2274319   | FALSE | FALSE | FALSE |         |            |        |        | 0.9972   | 0.9937   | 0.64                 | 0.3359 | v2v3v4  |
| rs6081613   | FALSE | TRUE  | FALSE | 0.7932  | 0.0        | 0.0    | 0.7692 | 0.9924   | 0.9870   | $5.1 \times 10^{-5}$ | 0.7147 | v2v3v4  |
| rs12134493  | FALSE | FALSE | TRUE  | 1.0000  | 0.18       | 0.32   | 0.8849 | 0.9979   | 0.9952   | 0.40                 | 0.8850 | v2v3v4  |
| rs1923243   | FALSE | FALSE | FALSE |         |            |        |        | 0.9937   | 0.9928   | 0.73                 | 0.4711 | v2v3v4  |
| rs149163995 | FALSE | FALSE | FALSE |         |            |        |        | 0.8344   | 0.8223   | 0.034                | 0.1248 | v2v3v4  |
| rs7220465   | TRUE  | FALSE | FALSE | 0.9935  | 0.62       | 0.54   | 0.7167 | 0.8519   | 0.8269   | 0.0058               | 0.7132 | v2v3v4  |
| rs11187838  | FALSE | FALSE | FALSE |         |            |        |        | 0.9931   | 0.9897   | 0.11                 | 0.5478 | v2v3v4  |
| rs8052831   | FALSE | FALSE | FALSE |         |            |        |        | 0.9938   | 0.9782   | 0.013                | 0.3374 | v2v3v4  |
| rs4910165   | FALSE | FALSE | FALSE |         |            |        |        | 0.9975   | 0.9932   | 0.080                | 0.6783 | v2v3v4  |
| rs1245465   | FALSE | FALSE | FALSE |         |            |        |        | 0.9975   | 0.9960   | 0.55                 | 0.4640 | v2v3v4  |
| rs11624776  | FALSE | FALSE | FALSE |         |            |        |        | 0.9780   | 0.9578   | 0.032                | 0.3231 | v2v3v4  |
| rs61693171  | FALSE | FALSE | FALSE |         |            |        |        | 0.9905   | 0.9736   | 0.74                 | 0.1060 | v2v3v4  |
| rs3793683   | FALSE | FALSE | FALSE |         |            |        |        | 0.9568   | 0.9006   | 0.049                | 0.6265 | v2v3v4  |
| rs10156578  | FALSE | FALSE | FALSE |         |            |        |        | 0.9557   | 0.9455   | 0.68                 | 0.5594 | v2v3v4  |
| rs7030607   | TRUE  | TRUE  | TRUE  | 0.9977  | 0.16       | 0.48   | 0.6544 | 0.9998   | 0.9994   | 0.24                 | 0.6560 | v2v3v4  |
| rs202203062 | FALSE | FALSE | FALSE |         |            |        |        | 0.9212   | 0.8858   | $3.3 \times 10^{-6}$ | 0.8346 | v2v3v4  |

|             |       |       |       |        |       |      |        |        |        |       |        |        |
|-------------|-------|-------|-------|--------|-------|------|--------|--------|--------|-------|--------|--------|
| rs910187    | FALSE | TRUE  | FALSE | 0.9995 | 0.038 | 0.52 | 0.6343 | 0.9761 | 0.9028 | 0.19  | 0.6344 | v2v3v4 |
| rs200914569 | FALSE | FALSE | FALSE |        |       |      |        | 0.8653 | 0.8482 | 0.083 | 0.5496 | v2v3v4 |
| rs10871745  | FALSE | FALSE | FALSE |        |       |      |        | 0.9309 | 0.9157 | 0.085 | 0.6390 | v2v3v4 |

## SNP Statistics in the GWAS Sample

| assay.name  | AA.0  | AB.0   | BB.0  | im.num.0 | dose.b.0 | AA.1  | AB.1  | BB.1  | im.num.1 | dose.b.1 |
|-------------|-------|--------|-------|----------|----------|-------|-------|-------|----------|----------|
| rs11172113  | 37929 | 111010 | 81762 | 230876   | 0.5967   | 7784  | 25198 | 20091 | 53109    | 0.6173   |
| rs2075968   |       |        |       | 230876   | 0.2306   |       |       |       | 53109    | 0.2473   |
| rs9486719   |       |        |       | 230876   | 0.7980   |       |       |       | 53109    | 0.7849   |
| rs9349379   | 80570 | 111653 | 38595 | 230876   | 0.4100   | 19491 | 25459 | 8150  | 53109    | 0.3942   |
| rs1965629   |       |        |       | 230876   | 0.1937   |       |       |       | 53109    | 0.1821   |
| rs140668749 |       |        |       | 230876   | 0.4662   |       |       |       | 53109    | 0.4840   |
| rs2274319   |       |        |       | 230876   | 0.3339   |       |       |       | 53109    | 0.3491   |
| rs6081613   | 13046 | 34668  | 86732 | 230876   | 0.7192   | 3206  | 8041  | 19283 | 53109    | 0.7078   |
| rs12134493  | 639   | 9308   | 36099 | 230876   | 0.8862   | 167   | 2407  | 8487  | 53109    | 0.8772   |
| rs1923243   |       |        |       | 230876   | 0.4687   |       |       |       | 53109    | 0.4803   |
| rs149163995 |       |        |       | 230876   | 0.1263   |       |       |       | 53109    | 0.1197   |
| rs7220465   | 1347  | 6789   | 8671  | 230876   | 0.7143   | 282   | 1489  | 1760  | 53109    | 0.7038   |
| rs11187838  |       |        |       | 230876   | 0.5480   |       |       |       | 53109    | 0.5618   |
| rs8052831   |       |        |       | 230876   | 0.3365   |       |       |       | 53109    | 0.3475   |
| rs4910165   |       |        |       | 230876   | 0.6756   |       |       |       | 53109    | 0.6866   |
| rs1245465   |       |        |       | 230876   | 0.4616   |       |       |       | 53109    | 0.4714   |
| rs11624776  |       |        |       | 230876   | 0.3248   |       |       |       | 53109    | 0.3133   |
| rs61693171  |       |        |       | 230876   | 0.1050   |       |       |       | 53109    | 0.1112   |
| rs3793683   |       |        |       | 230876   | 0.6251   |       |       |       | 53109    | 0.6348   |
| rs10156578  |       |        |       | 230876   | 0.5619   |       |       |       | 53109    | 0.5531   |
| rs7030607   | 27744 | 104478 | 98186 | 230876   | 0.6525   | 6074  | 23716 | 23232 | 53109    | 0.6617   |
| rs202203062 |       |        |       | 230876   | 0.8328   |       |       |       | 53109    | 0.8379   |
| rs910187    | 22947 | 79581  | 67923 | 230876   | 0.6311   | 4955  | 18179 | 15968 | 53109    | 0.6402   |
| rs200914569 |       |        |       | 230876   | 0.5516   |       |       |       | 53109    | 0.5420   |
| rs10871745  |       |        |       | 230876   | 0.6390   |       |       |       | 53109    | 0.6489   |

## Annotations from NHGRI GWAS Catalog

The following table shows, for each index SNP, all entries in the NHGRI GWAS Catalog that are within 500kb and in at least moderate linkage disequilibrium ( $r^2 > 0.5$ ).

| region   | position  | our.name    | our.pval              | dist    | rsqr  | assay.name | pvalue                | pubmed.id | trait                                | genes               |
|----------|-----------|-------------|-----------------------|---------|-------|------------|-----------------------|-----------|--------------------------------------|---------------------|
| 12q13.3  | 57527283  | rs11172113  | 5.6×10 <sup>-36</sup> | 0       | 1.000 | rs11172113 | 1.0×10 <sup>-10</sup> | 23793025  | Migraine without aura                | LRP1                |
| 12q13.3  | 57527283  | rs11172113  | 5.6×10 <sup>-36</sup> | 0       | 1.000 | rs11172113 | 1.0×10 <sup>-6</sup>  | 23793025  | Migraine - clinic-based              | LRP1                |
| 12q13.3  | 57527283  | rs11172113  | 5.6×10 <sup>-36</sup> | 0       | 1.000 | rs11172113 | 4.0×10 <sup>-19</sup> | 23793025  | Migraine                             | LRP1                |
| 12q13.3  | 57527283  | rs11172113  | 5.6×10 <sup>-36</sup> | 0       | 1.000 | rs11172113 | 8.0×10 <sup>-6</sup>  | 23284291  | Pulmonary function (interaction)     | LRP1                |
| 12q13.3  | 57527283  | rs11172113  | 5.6×10 <sup>-36</sup> | 0       | 1.000 | rs11172113 | 3.0×10 <sup>-8</sup>  | 22683712  | Migraine                             | LRP1                |
| 12q13.3  | 57527283  | rs11172113  | 5.6×10 <sup>-36</sup> | 0       | 1.000 | rs11172113 | 1.0×10 <sup>-8</sup>  | 21946350  | Pulmonary function                   | LRP1                |
| 12q13.3  | 57527283  | rs11172113  | 5.6×10 <sup>-36</sup> | 0       | 1.000 | rs11172113 | 4.0×10 <sup>-9</sup>  | 21666692  | Migraine                             | LRP1                |
| 12q13.3  | 57527283  | rs11172113  | 5.6×10 <sup>-36</sup> | 7187    | 0.595 | rs1466535  | 5.0×10 <sup>-10</sup> | 22055160  | Abdominal aortic aneurysm            | LRP1                |
| 6q16.1   | 97060124  | rs9486719   | 5.7×10 <sup>-21</sup> | -175238 | 0.855 | rs11757063 | 6.0×10 <sup>-8</sup>  | 22683712  | Migraine                             | FHL5                |
| 6q16.1   | 97060124  | rs9486719   | 5.7×10 <sup>-21</sup> | 5088    | 0.783 | rs11759769 | 2.0×10 <sup>-12</sup> | 23793025  | Migraine without aura                | FHL5                |
| 6q16.1   | 97060124  | rs9486719   | 5.7×10 <sup>-21</sup> | 5088    | 0.783 | rs11759769 | 4.0×10 <sup>-7</sup>  | 23793025  | Migraine - clinic-based              | FHL5                |
| 6q16.1   | 97060124  | rs9486719   | 5.7×10 <sup>-21</sup> | 5088    | 0.783 | rs11759769 | 1.0×10 <sup>-11</sup> | 23793025  | Migraine                             | FHL5                |
| 6p24.1   | 12903957  | rs9349379   | 1.5×10 <sup>-20</sup> | 0       | 1.000 | rs9349379  | 3.0×10 <sup>-10</sup> | 23793025  | Migraine without aura                | TBC1D7,PHACTR1,TSC1 |
| 6p24.1   | 12903957  | rs9349379   | 1.5×10 <sup>-20</sup> | 0       | 1.000 | rs9349379  | 2.0×10 <sup>-6</sup>  | 23793025  | Migraine - clinic-based              | PHACTR1             |
| 6p24.1   | 12903957  | rs9349379   | 1.5×10 <sup>-20</sup> | 0       | 1.000 | rs9349379  | 5.0×10 <sup>-8</sup>  | 23793025  | Migraine                             | PHACTR1, TBC1D7     |
| 6p24.1   | 12903957  | rs9349379   | 1.5×10 <sup>-20</sup> | 0       | 1.000 | rs9349379  | 2.0×10 <sup>-9</sup>  | 22751097  | Coronary heart disease               | PHACTR1             |
| 6p24.1   | 12903957  | rs9349379   | 1.5×10 <sup>-20</sup> | 0       | 1.000 | rs9349379  | 8.0×10 <sup>-10</sup> | 22745674  | Coronary heart disease               | PHACTR1             |
| 6p24.1   | 12903957  | rs9349379   | 1.5×10 <sup>-20</sup> | 0       | 1.000 | rs9349379  | 3.0×10 <sup>-8</sup>  | 22683712  | Migraine                             | PHACTR1             |
| 6p24.1   | 12903957  | rs9349379   | 1.5×10 <sup>-20</sup> | 0       | 1.000 | rs9349379  | 4.0×10 <sup>-22</sup> | 22144573  | Coronary artery calcification        | PHACTR1             |
| 6p24.1   | 12903957  | rs9349379   | 1.5×10 <sup>-20</sup> | 0       | 1.000 | rs9349379  | 9.0×10 <sup>-26</sup> | 21846871  | Coronary heart disease               | PHACTR1             |
| 6p24.1   | 12903957  | rs9349379   | 1.5×10 <sup>-20</sup> | 0       | 1.000 | rs9349379  | 9.0×10 <sup>-26</sup> | 21378988  | Coronary heart disease               | PHACTR1             |
| 2q37.1   | 234824731 | rs1965629   | 7.3×10 <sup>-19</sup> | -10672  | 0.991 | rs10187654 | 9.0×10 <sup>-6</sup>  | 22424883  | Pulmonary function decline           | Intergenic          |
| 2q37.1   | 234824731 | rs1965629   | 7.3×10 <sup>-19</sup> | 362     | 1.000 | rs10166942 | 1.0×10 <sup>-12</sup> | 22683712  | Migraine                             | TRPM8               |
| 2q37.1   | 234824731 | rs1965629   | 7.3×10 <sup>-19</sup> | 362     | 1.000 | rs10166942 | 6.0×10 <sup>-12</sup> | 21666692  | Migraine                             | TRPM8               |
| 12p13.32 | 4528671   | rs140668749 | 1.3×10 <sup>-18</sup> | -5215   | 0.958 | rs10849061 | 2.0×10 <sup>-6</sup>  | 23793025  | Migraine without aura                | Intergenic          |
| 12p13.32 | 4528671   | rs140668749 | 1.3×10 <sup>-18</sup> | -5215   | 0.958 | rs10849061 | 1.0×10 <sup>-6</sup>  | 23793025  | Migraine - clinic-based              | Intergenic          |
| 12p13.32 | 4528671   | rs140668749 | 1.3×10 <sup>-18</sup> | -5215   | 0.958 | rs10849061 | 2.0×10 <sup>-7</sup>  | 23793025  | Migraine                             | Intergenic          |
| 1q22     | 156450873 | rs2274319   | 2.2×10 <sup>-18</sup> | -4631   | 0.988 | rs2274316  | 1.0×10 <sup>-7</sup>  | 23793025  | Migraine - clinic-based              | MEF2D, APOA1BP      |
| 1q22     | 156450873 | rs2274319   | 2.2×10 <sup>-18</sup> | -4631   | 0.988 | rs2274316  | 1.0×10 <sup>-8</sup>  | 23793025  | Migraine                             | MEF2D, APOA1BP      |
| 1q22     | 156450873 | rs2274319   | 2.2×10 <sup>-18</sup> | 5428    | 0.994 | rs3790455  | 7.0×10 <sup>-11</sup> | 22683712  | Migraine                             | MEF2D               |
| 1p13.2   | 115677946 | rs12134493  | 2.1×10 <sup>-13</sup> | 0       | 1.000 | rs12134493 | 5.0×10 <sup>-8</sup>  | 23793025  | Migraine without aura                | TSPAN2              |
| 1p13.2   | 115677946 | rs12134493  | 2.1×10 <sup>-13</sup> | 0       | 1.000 | rs12134493 | 5.0×10 <sup>-14</sup> | 23793025  | Migraine                             | TSPAN2              |
| 1p31.1   | 73868386  | rs1923243   | 2.2×10 <sup>-10</sup> | -43477  | 0.519 | rs10789369 | 4.0×10 <sup>-10</sup> | 23974872  | Schizophrenia                        | Intergenic          |
| 2q33.2   | 203777226 | rs149163995 | 4.4×10 <sup>-10</sup> | -31341  | 0.539 | rs6725887  | 1.0×10 <sup>-9</sup>  | 21378990  | Coronary heart disease               | WDR12               |
| 2q33.2   | 203777226 | rs149163995 | 4.4×10 <sup>-10</sup> | -31341  | 0.539 | rs6725887  | 1.0×10 <sup>-8</sup>  | 19198609  | Myocardial infarction (early onset)  | WDR12               |
| 10q23.33 | 96038686  | rs11187838  | 1.3×10 <sup>-9</sup>  | -24981  | 0.508 | rs9419788  | 4.0×10 <sup>-8</sup>  | 21368711  | Personality dimensions               | PLCE1               |
| 10q23.33 | 96038686  | rs11187838  | 1.3×10 <sup>-9</sup>  | 19612   | 0.522 | rs3765524  | 3.0×10 <sup>-10</sup> | 22001756  | Dengue shock syndrome                | PLCE1               |
| 10q23.33 | 96038686  | rs11187838  | 1.3×10 <sup>-9</sup>  | 19612   | 0.522 | rs3765524  | 2.0×10 <sup>-9</sup>  | 20729852  | Esophageal cancer and gastric cancer | PLCE1,NOC3L         |

|          |           |             |                      |        |       |            |                       |          |                                                                         |                                    |
|----------|-----------|-------------|----------------------|--------|-------|------------|-----------------------|----------|-------------------------------------------------------------------------|------------------------------------|
| 10q23.33 | 96038686  | rs11187838  | $1.3 \times 10^{-9}$ | 27655  | 0.608 | rs2274223  | $4.0 \times 10^{-20}$ | 21642993 | Esophageal cancer                                                       | PLCE1                              |
| 11p15.4  | 10674044  | rs4910165   | $2.1 \times 10^{-9}$ | -4816  | 0.963 | rs7940646  | $1.0 \times 10^{-6}$  | 20526338 | Platelet aggregation                                                    | MRVI1                              |
| 11p15.4  | 10674044  | rs4910165   | $2.1 \times 10^{-9}$ | -305   | 0.994 | rs4909945  | $2.0 \times 10^{-7}$  | 23793025 | Migraine                                                                | Intergenic                         |
| 14q32.12 | 93595591  | rs11624776  | $3.5 \times 10^{-9}$ | 0      | 1.000 | rs11624776 | $3.0 \times 10^{-6}$  | 23408906 | Thyroid hormone levels                                                  | ITPK1                              |
| 7p14.1   | 40417731  | rs61693171  | $8.7 \times 10^{-9}$ | 48469  | 0.969 | rs4379368  | $6.0 \times 10^{-8}$  | 23793025 | Migraine without aura                                                   | c7orf10                            |
| 7p14.1   | 40417731  | rs61693171  | $8.7 \times 10^{-9}$ | 48469  | 0.969 | rs4379368  | $7.0 \times 10^{-7}$  | 23793025 | Migraine - clinic-based                                                 | c7orf10                            |
| 7p14.1   | 40417731  | rs61693171  | $8.7 \times 10^{-9}$ | 48469  | 0.969 | rs4379368  | $1.0 \times 10^{-9}$  | 23793025 | Migraine                                                                | c7orf10                            |
| 9q33.1   | 119245183 | rs7030607   | $2.3 \times 10^{-8}$ | 4156   | 0.977 | rs7852872  | $1.0 \times 10^{-7}$  | 22504421 | Hippocampal volume                                                      | ASTN2                              |
| 7q11.23  | 72857717  | rs202203062 | $2.5 \times 10^{-8}$ | -1448  | 0.588 | rs2240466  | $1.0 \times 10^{-6}$  | 21490707 | Caffeine consumption                                                    |                                    |
| 7q11.23  | 72857717  | rs202203062 | $2.5 \times 10^{-8}$ | -1448  | 0.588 | rs2240466  | $1.0 \times 10^{-12}$ | 19060911 | Triglycerides                                                           | MLXIPL                             |
| 7q11.23  | 72857717  | rs202203062 | $2.5 \times 10^{-8}$ | -1287  | 0.863 | rs1178979  | $2.0 \times 10^{-12}$ | 20864672 | Triglycerides                                                           | BAZ1B, BCL7B, ...                  |
| 7q11.23  | 72857717  | rs202203062 | $2.5 \times 10^{-8}$ | -668   | 0.863 | rs1178977  | $1.0 \times 10^{-12}$ | 23263486 | Urate levels                                                            | BAZ1B, MLXIPL                      |
| 7q11.23  | 72857717  | rs202203062 | $2.5 \times 10^{-8}$ | 7152   | 0.588 | rs714052   | $3.0 \times 10^{-6}$  | 20657596 | Hypertriglyceridemia                                                    | MLXIPL                             |
| 7q11.23  | 72857717  | rs202203062 | $2.5 \times 10^{-8}$ | 7152   | 0.588 | rs714052   | $3.0 \times 10^{-7}$  | 20139978 | Triglycerides                                                           | MIXIPL                             |
| 7q11.23  | 72857717  | rs202203062 | $2.5 \times 10^{-8}$ | 7152   | 0.588 | rs714052   | $3.0 \times 10^{-15}$ | 19060906 | Triglycerides                                                           | MLXIPL                             |
| 7q11.23  | 72857717  | rs202203062 | $2.5 \times 10^{-8}$ | 47093  | 0.863 | rs17145713 | $3.0 \times 10^{-8}$  | 20802025 | Protein C levels                                                        | BAZ1B                              |
| 7q11.23  | 72857717  | rs202203062 | $2.5 \times 10^{-8}$ | 113514 | 0.545 | rs13233571 | $4.0 \times 10^{-9}$  | 21300955 | C-reactive protein<br>Gamma glutamyl<br>transpeptidase                  | BCL7B                              |
| 7q11.23  | 72857717  | rs202203062 | $2.5 \times 10^{-8}$ | 120181 | 0.531 | rs12539316 | $6.0 \times 10^{-10}$ | 21909109 |                                                                         | TBL2                               |
| 7q11.23  | 72857717  | rs202203062 | $2.5 \times 10^{-8}$ | 125157 | 0.572 | rs17145738 | $9.0 \times 10^{-59}$ | 20686565 | Triglycerides                                                           | MLXIPL                             |
| 7q11.23  | 72857717  | rs202203062 | $2.5 \times 10^{-8}$ | 125157 | 0.572 | rs17145738 | $1.0 \times 10^{-9}$  | 20686565 | HDL cholesterol                                                         | MLXIPL                             |
| 7q11.23  | 72857717  | rs202203062 | $2.5 \times 10^{-8}$ | 125157 | 0.572 | rs17145738 | $7.0 \times 10^{-22}$ | 18193044 | Triglycerides                                                           | BCL7B, TBL2, MLXIPL                |
| 7q11.23  | 72857717  | rs202203062 | $2.5 \times 10^{-8}$ | 125157 | 0.572 | rs17145738 | $2.0 \times 10^{-12}$ | 18193043 | Triglycerides                                                           | MLXIPL                             |
| 7q11.23  | 72857717  | rs202203062 | $2.5 \times 10^{-8}$ | 129637 | 0.514 | rs2286276  | $2.0 \times 10^{-6}$  | 23505323 | Hypertriglyceridemia                                                    | VPS37D, TBL2, MLXIPL, BCL7B, BAZ1B |
| 7q11.23  | 72857717  | rs202203062 | $2.5 \times 10^{-8}$ | 129637 | 0.514 | rs2286276  | $1.0 \times 10^{-15}$ | 21909109 | Triglycerides<br>Lipid metabolism<br>phenotypes                         | TBL2, MLXIPL                       |
| 7q11.23  | 72857717  | rs202203062 | $2.5 \times 10^{-8}$ | 152725 | 0.788 | rs13247874 | $8.0 \times 10^{-14}$ | 22286219 |                                                                         | MLXIPL                             |
| 7q11.23  | 72857717  | rs202203062 | $2.5 \times 10^{-8}$ | 159288 | 0.766 | rs13226650 | $2.0 \times 10^{-11}$ | 22399527 | Metabolic syndrome                                                      | MLXIPL                             |
| 7q11.23  | 72857717  | rs202203062 | $2.5 \times 10^{-8}$ | 162620 | 0.544 | rs3812316  | $1.0 \times 10^{-10}$ | 18193046 | Triglycerides<br>Liver enzyme levels<br>(gamma-glutamyl<br>transferase) | MLXIPL                             |
| 7q11.23  | 72857717  | rs202203062 | $2.5 \times 10^{-8}$ | 168661 | 0.613 | rs17145750 | $3.0 \times 10^{-9}$  | 22001757 |                                                                         | MLXIPL                             |
| 16q23.1  | 75442144  | rs200914569 | $5.7 \times 10^{-8}$ | -51828 | 0.808 | rs2865531  | $2.0 \times 10^{-8}$  | 23284291 | Pulmonary function<br>(interaction)                                     | CFDP1                              |
| 16q23.1  | 75442144  | rs200914569 | $5.7 \times 10^{-8}$ | -51828 | 0.808 | rs2865531  | $2.0 \times 10^{-11}$ | 21946350 | Pulmonary function                                                      | CFDP1                              |

## Replication of GWAS Catalog Results

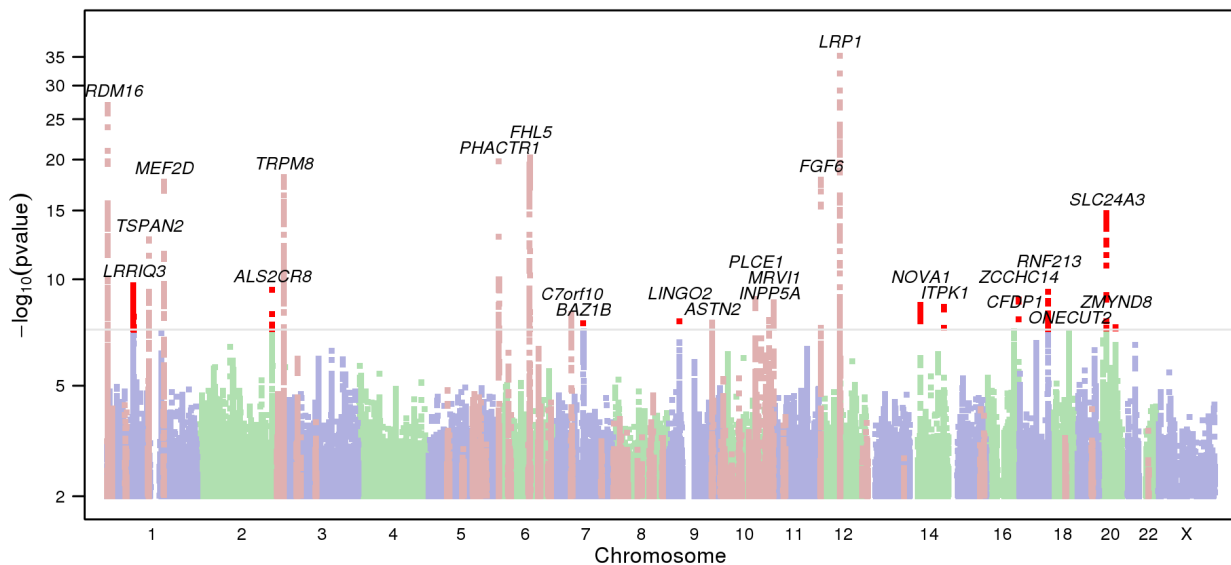

The following table shows, for each GWAS Catalog result for similar traits, our association test result for our best available proxy (distance < 100kb,  $r^2 > 0.8$ ).

| region  | position  | our_name   | our_pval              | dist | rsqr  | assay_name | pvalue                | pubmed.id | trait    | genes          |
|---------|-----------|------------|-----------------------|------|-------|------------|-----------------------|-----------|----------|----------------|
| 1p36.32 | 3083712   | rs2651899  | $3.4 \times 10^{-14}$ | 0    | 1.000 | rs2651899  | $4.0 \times 10^{-14}$ | 23793025  | Migraine | PRDM16         |
| 1p36.32 | 3083712   | rs2651899  | $3.4 \times 10^{-14}$ | 0    | 1.000 | rs2651899  | $4.0 \times 10^{-9}$  | 21666692  | Migraine | PRDM16         |
| 1p36.21 | 15548636  | rs10737909 | $7.5 \times 10^{-5}$  | 0    | 1.000 | rs10737909 | $2.0 \times 10^{-7}$  | 23793025  | Migraine | Intergenic     |
| 1p32.3  | 54668278  | rs1890566  | 0.32                  | 0    | 1.000 | rs1890566  | $8.0 \times 10^{-7}$  | 23793025  | Migraine | Intergenic     |
| 1p13.2  | 115677946 | rs12134493 | $2.1 \times 10^{-13}$ | 0    | 1.000 | rs12134493 | $5.0 \times 10^{-14}$ | 23793025  | Migraine | TSPAN2         |
| 1q22    | 156446242 | rs2274316  | $5.2 \times 10^{-18}$ | 0    | 1.000 | rs2274316  | $1.0 \times 10^{-8}$  | 23793025  | Migraine | MEF2D, APOA1BP |
| 1q22    | 156456301 | rs3790455  | $2.8 \times 10^{-18}$ | 0    | 1.000 | rs3790455  | $7.0 \times 10^{-11}$ | 22683712  | Migraine | MEF2D          |
| 2q35    | 217208571 | rs6756590  | 0.11                  | 0    | 1.000 | rs6756590  | $1.0 \times 10^{-6}$  | 22683712  | Migraine | MARCH4         |
| 2q37.1  | 234825093 | rs10166942 | $7.5 \times 10^{-19}$ | 0    | 1.000 | rs10166942 | $1.0 \times 10^{-12}$ | 22683712  | Migraine | TRPM8          |
| 2q37.1  | 234825093 | rs10166942 | $7.5 \times 10^{-19}$ | 0    | 1.000 | rs10166942 | $6.0 \times 10^{-12}$ | 21666692  | Migraine | TRPM8          |
| 2q37.1  | 234827661 | rs6741751  | $9.2 \times 10^{-12}$ | 0    | 1.000 | rs6741751  | $9.0 \times 10^{-14}$ | 23793025  | Migraine | TRPM8          |
| 3p24.1  | 30462403  | rs7640543  | $4.2 \times 10^{-5}$  | 0    | 1.000 | rs7640543  | $1.0 \times 10^{-9}$  | 22683712  | Migraine | TGFBR2         |

|          |           |            |                       |   |       |            |                       |          |          |                 |
|----------|-----------|------------|-----------------------|---|-------|------------|-----------------------|----------|----------|-----------------|
| 3p22.2   | 38886413  | rs3923518  | 0.060                 | 0 | 1.000 | rs3923518  | 8.0×10 <sup>-6</sup>  | 23793025 | Migraine | Intergenic      |
| 3p12.2   | 80368463  | rs10511112 | 0.019                 | 0 | 1.000 | rs10511112 | 5.0×10 <sup>-6</sup>  | 23793025 | Migraine | Intergenic      |
| 5q11.2   | 53380555  | rs273218   | 0.70                  | 0 | 1.000 | rs273218   | 2.0×10 <sup>-6</sup>  | 23793025 | Migraine | Intergenic      |
| 5q15     | 92464416  | rs12519773 | 0.15                  | 0 | 1.000 | rs12519773 | 2.0×10 <sup>-6</sup>  | 23793025 | Migraine | Intergenic      |
| 5q23.2   | 122264736 | rs2447820  | 0.0035                | 0 | 1.000 | rs2447820  | 4.0×10 <sup>-6</sup>  | 23793025 | Migraine | Intergenic      |
| 5q31.3   | 142899801 | rs12153243 | 0.31                  | 0 | 1.000 | rs12153243 | 6.0×10 <sup>-6</sup>  | 23793025 | Migraine | Intergenic      |
| 5q33.3   | 159367971 | rs11750092 | 0.27                  | 0 | 1.000 | rs11750092 | 7.0×10 <sup>-6</sup>  | 23793025 | Migraine | Intergenic      |
| 6p24.1   | 12903957  | rs9349379  | 1.5×10 <sup>-20</sup> | 0 | 1.000 | rs9349379  | 5.0×10 <sup>-8</sup>  | 23793025 | Migraine | PHACTR1, TBC1D7 |
| 6p24.1   | 12903957  | rs9349379  | 1.5×10 <sup>-20</sup> | 0 | 1.000 | rs9349379  | 3.0×10 <sup>-8</sup>  | 22683712 | Migraine | PHACTR1         |
| 6p21.2   | 39183470  | rs10456100 | 5.2×10 <sup>-7</sup>  | 0 | 1.000 | rs10456100 | 5.0×10 <sup>-7</sup>  | 23793025 | Migraine | Intergenic      |
| 6p21.1   | 44424800  | rs543844   | 0.26                  | 0 | 1.000 | rs543844   | 3.0×10 <sup>-6</sup>  | 23793025 | Migraine | Intergenic      |
| 6q16.1   | 96884886  | rs11757063 | 2.0×10 <sup>-18</sup> | 0 | 1.000 | rs11757063 | 6.0×10 <sup>-8</sup>  | 22683712 | Migraine | FHL5            |
| 6q16.1   | 97065212  | rs11759769 | 1.5×10 <sup>-19</sup> | 0 | 1.000 | rs11759769 | 1.0×10 <sup>-11</sup> | 23793025 | Migraine | FHL5            |
| 6q22.31  | 121816879 | rs9490306  | 5.6×10 <sup>-6</sup>  | 0 | 1.000 | rs9490306  | 7.0×10 <sup>-6</sup>  | 23793025 | Migraine | Intergenic      |
| 6q24.3   | 148923789 | rs13196614 | 0.47                  | 0 | 1.000 | rs13196614 | 5.0×10 <sup>-6</sup>  | 23793025 | Migraine | Intergenic      |
| 6q25.2   | 153265210 | rs13218732 | 0.55                  | 0 | 1.000 | rs13218732 | 3.0×10 <sup>-6</sup>  | 23793025 | Migraine | Intergenic      |
| 7p14.1   | 40466200  | rs4379368  | 3.0×10 <sup>-8</sup>  | 0 | 1.000 | rs4379368  | 1.0×10 <sup>-9</sup>  | 23793025 | Migraine | c7orf10         |
| 7q31.32  | 123376560 | rs9649465  | 0.78                  | 0 | 1.000 | rs9649465  | 1.0×10 <sup>-6</sup>  | 23793025 | Migraine | Intergenic      |
| 7q36.3   | 155285135 | rs1861960  | 0.59                  | 0 | 1.000 | rs1861960  | 6.0×10 <sup>-6</sup>  | 23793025 | Migraine | Intergenic      |
| 8p22     | 12811152  | rs2946505  | 0.12                  | 0 | 1.000 | rs2946505  | 9.0×10 <sup>-6</sup>  | 23793025 | Migraine | Intergenic      |
| 8p12     | 29982518  | rs12681963 | 0.63                  | 0 | 1.000 | rs12681963 | 2.0×10 <sup>-7</sup>  | 23793025 | Migraine | Intergenic      |
| 8q12.2   | 62054463  | rs12681792 | 0.22                  | 0 | 1.000 | rs12681792 | 9.0×10 <sup>-7</sup>  | 23793025 | Migraine | Intergenic      |
| 8q13.3   | 72447418  | rs13263568 | 0.14                  | 0 | 1.000 | rs13263568 | 2.0×10 <sup>-6</sup>  | 23793025 | Migraine | Intergenic      |
| 8q22.1   | 98166913  | rs1835740  | 0.13                  | 0 | 1.000 | rs1835740  | 2.0×10 <sup>-11</sup> | 20802479 | Migraine | MTDH,PGCP       |
| 8q22.3   | 103639941 | rs6998277  | 0.72                  | 0 | 1.000 | rs6998277  | 2.0×10 <sup>-6</sup>  | 23793025 | Migraine | Intergenic      |
| 8q24.21  | 131033496 | rs16904191 | 0.027                 | 0 | 1.000 | rs16904191 | 2.0×10 <sup>-7</sup>  | 23793025 | Migraine | Intergenic      |
| 9q33.1   | 118424987 | rs12006166 | 0.36                  | 0 | 1.000 | rs12006166 | 9.0×10 <sup>-7</sup>  | 23793025 | Migraine | Intergenic      |
| 9q33.1   | 119181794 | rs17303101 | 0.0029                | 0 | 1.000 | rs17303101 | 4.0×10 <sup>-7</sup>  | 23793025 | Migraine | Intergenic      |
| 9q33.1   | 119252629 | rs6478241  | 7.0×10 <sup>-7</sup>  | 0 | 1.000 | rs6478241  | 4.0×10 <sup>-8</sup>  | 22683712 | Migraine | ASTN2           |
| 10p15.3  | 759268    | rs7916968  | 0.79                  | 0 | 1.000 | rs7916968  | 7.0×10 <sup>-6</sup>  | 23793025 | Migraine | Intergenic      |
| 10p15.3  | 1246883   | rs4880487  | 0.27                  | 0 | 1.000 | rs4880487  | 3.0×10 <sup>-6</sup>  | 23793025 | Migraine | Intergenic      |
| 10p14    | 6924444   | rs11816922 | 0.18                  | 0 | 1.000 | rs11816922 | 5.0×10 <sup>-6</sup>  | 23793025 | Migraine | Intergenic      |
| 10p14    | 8719269   | rs827382   | 8.9×10 <sup>-5</sup>  | 0 | 1.000 | rs827382   | 9.0×10 <sup>-8</sup>  | 23793025 | Migraine | Intergenic      |
| 10p13    | 13790265  | rs10906466 | 0.75                  | 0 | 1.000 | rs10906466 | 8.0×10 <sup>-6</sup>  | 23793025 | Migraine | Intergenic      |
| 10p13    | 14945406  | rs11594111 | 0.76                  | 0 | 1.000 | rs11594111 | 1.0×10 <sup>-7</sup>  | 23793025 | Migraine | Intergenic      |
| 10p13    | 16634299  | rs7068341  | 0.43                  | 0 | 1.000 | rs7068341  | 2.0×10 <sup>-6</sup>  | 23793025 | Migraine | Intergenic      |
| 10p11.22 | 33503179  | rs2506155  | 0.042                 | 0 | 1.000 | rs2506155  | 3.0×10 <sup>-6</sup>  | 23793025 | Migraine | Intergenic      |
| 10q11.23 | 52789355  | rs6479874  | 0.13                  | 0 | 1.000 | rs6479874  | 3.0×10 <sup>-7</sup>  | 23793025 | Migraine | Intergenic      |
| 10q21.1  | 53681794  | rs11000137 | 0.74                  | 0 | 1.000 | rs11000137 | 3.0×10 <sup>-6</sup>  | 23793025 | Migraine | Intergenic      |
| 10q22.3  | 80515081  | rs7900239  | 0.93                  | 0 | 1.000 | rs7900239  | 9.0×10 <sup>-6</sup>  | 23793025 | Migraine | Intergenic      |
| 10q23.33 | 96534263  | rs6583954  | 0.66                  | 0 | 1.000 | rs6583954  | 4.0×10 <sup>-6</sup>  | 23793025 | Migraine | Intergenic      |
| 10q24.2  | 100291176 | rs577969   | 0.59                  | 0 | 1.000 | rs577969   | 4.0×10 <sup>-6</sup>  | 23793025 | Migraine | Intergenic      |
| 10q24.32 | 104748718 | rs1890185  | 0.053                 | 0 | 1.000 | rs1890185  | 4.0×10 <sup>-7</sup>  | 23793025 | Migraine | Intergenic      |
| 10q24.33 | 105033015 | rs1712517  | 0.023                 | 0 | 1.000 | rs1712517  | 9.0×10 <sup>-6</sup>  | 22683712 | Migraine | INA             |
| 10q25.2  | 114202526 | rs12355831 | 0.20                  | 0 | 1.000 | rs12355831 | 2.0×10 <sup>-6</sup>  | 23793025 | Migraine | Intergenic      |
| 10q26.13 | 125251675 | rs705162   | 0.0018                | 0 | 1.000 | rs705162   | 3.0×10 <sup>-6</sup>  | 23793025 | Migraine | Intergenic      |
| 10q26.3  | 132168065 | rs11017221 | 0.50                  | 0 | 1.000 | rs11017221 | 1.0×10 <sup>-7</sup>  | 23793025 | Migraine | Intergenic      |
| 11p15.4  | 10673739  | rs4909945  | 2.2×10 <sup>-9</sup>  | 0 | 1.000 | rs4909945  | 2.0×10 <sup>-7</sup>  | 23793025 | Migraine | Intergenic      |
| 11p12    | 43236061  | rs12365397 | 0.62                  | 0 | 1.000 | rs12365397 | 9.0×10 <sup>-6</sup>  | 23793025 | Migraine | Intergenic      |
| 12p13.32 | 4523456   | rs10849061 | 3.2×10 <sup>-18</sup> | 0 | 1.000 | rs10849061 | 2.0×10 <sup>-7</sup>  | 23793025 | Migraine | Intergenic      |
| 12q13.3  | 57377347  | rs4759042  | 7.8×10 <sup>-14</sup> | 0 | 1.000 | rs4759042  | 3.0×10 <sup>-6</sup>  | 23793025 | Migraine | Intergenic      |
| 12q13.3  | 57527283  | rs11172113 | 5.6×10 <sup>-36</sup> | 0 | 1.000 | rs11172113 | 4.0×10 <sup>-19</sup> | 23793025 | Migraine | LRP1            |
| 12q13.3  | 57527283  | rs11172113 | 5.6×10 <sup>-36</sup> | 0 | 1.000 | rs11172113 | 3.0×10 <sup>-8</sup>  | 22683712 | Migraine | LRP1            |
| 12q13.3  | 57527283  | rs11172113 | 5.6×10 <sup>-36</sup> | 0 | 1.000 | rs11172113 | 4.0×10 <sup>-9</sup>  | 21666692 | Migraine | LRP1            |
| 12q24.23 | 118272871 | rs2723279  | 0.072                 | 0 | 1.000 | rs2723279  | 5.0×10 <sup>-6</sup>  | 23793025 | Migraine | Intergenic      |
| 12q24.33 | 132325239 | rs6598163  | 0.0093                | 0 | 1.000 | rs6598163  | 5.0×10 <sup>-7</sup>  | 22683712 | Migraine | MMP17           |
| 13q32.2  | 98827035  | rs285098   | 0.41                  | 0 | 1.000 | rs285098   | 7.0×10 <sup>-6</sup>  | 23793025 | Migraine | Intergenic      |
| 15q25.3  | 87695511  | rs11636768 | 0.65                  | 0 | 1.000 | rs11636768 | 5.0×10 <sup>-7</sup>  | 21448238 | Migraine | AGBL1           |
| 15q26.2  | 96647793  | rs4984499  | 0.27                  | 0 | 1.000 | rs4984499  | 8.0×10 <sup>-6</sup>  | 23793025 | Migraine | Intergenic      |
| 15q26.2  | 96809782  | rs1437588  | 0.50                  | 0 | 1.000 | rs1437588  | 3.0×10 <sup>-6</sup>  | 23793025 | Migraine | Intergenic      |
| 18q21.1  | 44860264  | rs9947662  | 0.0015                | 0 | 1.000 | rs9947662  | 3.0×10 <sup>-6</sup>  | 23793025 | Migraine | Intergenic      |
| 19q13.2  | 41851509  | rs4803455  | 0.19                  | 0 | 1.000 | rs4803455  | 8.0×10 <sup>-7</sup>  | 23793025 | Migraine | Intergenic      |
| 22q11.23 | 23922983  | rs140174   | 0.28                  | 0 | 1.000 | rs140174   | 8.0×10 <sup>-6</sup>  | 21448238 | Migraine | IGLL1           |

## Nearby Nonsynonymous SNPs

| region   | position  | our.name    | our.pval              | dist   | rsqr  | assay.name | gene    | aa.chg |
|----------|-----------|-------------|-----------------------|--------|-------|------------|---------|--------|
| 6q16.1   | 97060124  | rs9486719   | 5.7×10 <sup>-21</sup> | -1571  | 0.503 | rs2273621  | FHL5    | R204G  |
| 2q33.2   | 203777226 | rs149163995 | 4.4×10 <sup>-10</sup> | -11470 | 0.539 | rs35212307 | WDR12   | I75V   |
| 2q33.2   | 203777226 | rs149163995 | 4.4×10 <sup>-10</sup> | 69591  | 0.539 | rs72932557 | ALS2CR8 | Y571F  |
| 10q23.33 | 96038686  | rs11187838  | 1.3×10 <sup>-9</sup>  | 911    | 1.000 | rs2274224  | PLCE1   | R1575P |
| 10q23.33 | 96038686  | rs11187838  | 1.3×10 <sup>-9</sup>  | 19612  | 0.522 | rs3765524  | PLCE1   | T1777I |
| 10q23.33 | 96038686  | rs11187838  | 1.3×10 <sup>-9</sup>  | 27655  | 0.608 | rs2274223  | PLCE1   | H1927R |
| 11p15.4  | 10674044  | rs4910165   | 2.1×10 <sup>-9</sup>  | -305   | 0.994 | rs4909945  | MRV1    | I11V   |
| 7q11.23  | 72857717  | rs202203062 | 2.5×10 <sup>-8</sup>  | 154325 | 0.569 | rs35332062 | MLXIPL  | A358V  |
| 7q11.23  | 72857717  | rs202203062 | 2.5×10 <sup>-8</sup>  | 162620 | 0.544 | rs3812316  | MLXIPL  | Q241H  |

## Nearby Expression QTLs

| region   | position  | our.name    | our.pval              | dist   | rsqr  | assay.name | eqtl.dist | eqtl.gene | eqtl.pval             | eqtl.rsqr | tissue         | pubmed.id |
|----------|-----------|-------------|-----------------------|--------|-------|------------|-----------|-----------|-----------------------|-----------|----------------|-----------|
| 12q13.3  | 57527283  | rs11172113  | $5.6 \times 10^{-36}$ | 6407   | 0.642 | rs4759277  | 550082    | RBMS2     | $4.9 \times 10^{-6}$  | 0.016     | Monocyte       | 20502693  |
| 2q33.2   | 203777226 | rs149163995 | $4.4 \times 10^{-10}$ | -31341 | 0.539 | rs6725887  | 111405    | ALS2CR13  | $7.6 \times 10^{-30}$ | 0.083     | Monocyte       | 20502693  |
| 10q23.33 | 96038686  | rs11187838  | $1.3 \times 10^{-9}$  | -27897 | 0.502 | rs7919066  | 687626    | CYP2C9    | $2.0 \times 10^{-5}$  | 0.222     | Lymphoblastoid | 19644074  |
| 10q26.3  | 134568387 | rs3793683   | $1.7 \times 10^{-8}$  | -17505 | 0.559 | rs2803992  | 51163     | LOC644276 | 0.00023               | 0.047     | Monocyte       | 22446964  |

## Nearby Clinical Variants

no hits were found for clinical variants

## Regional Association Plots

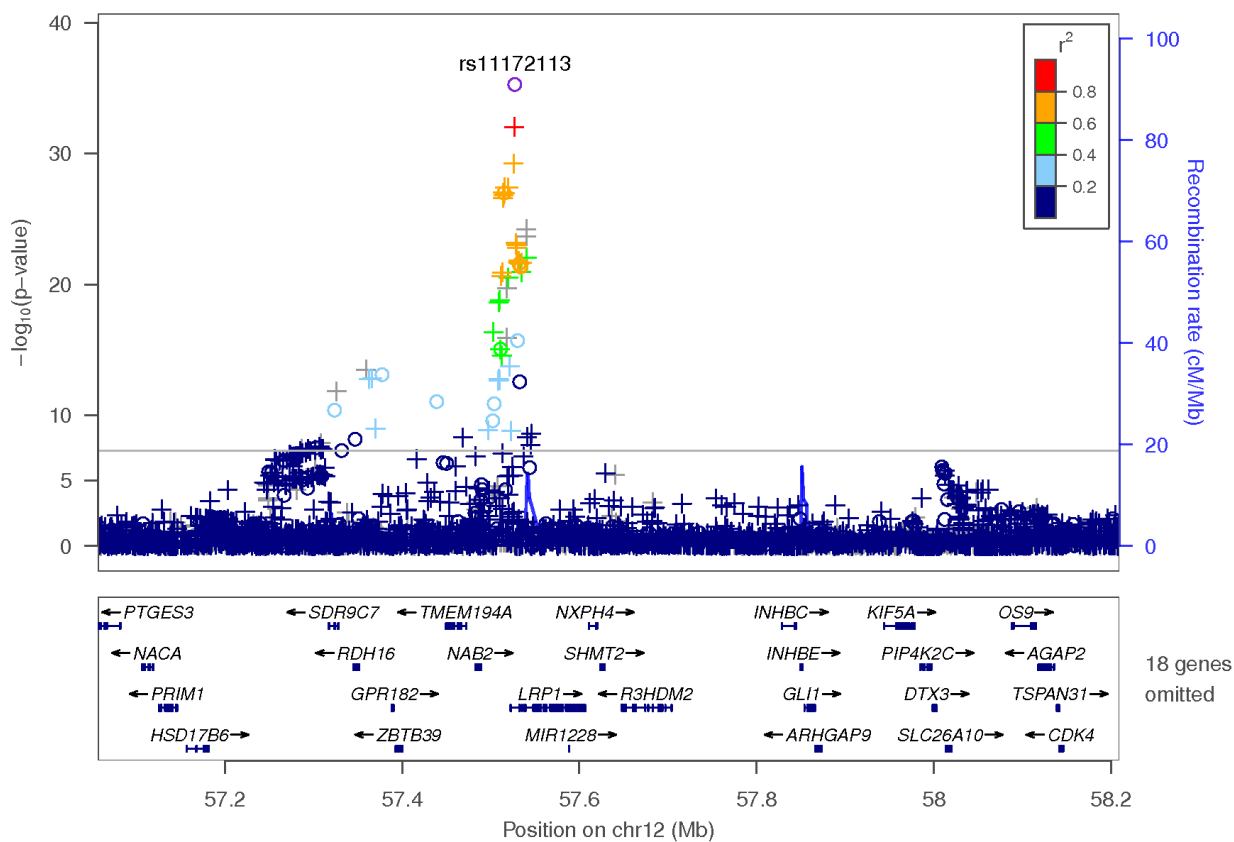

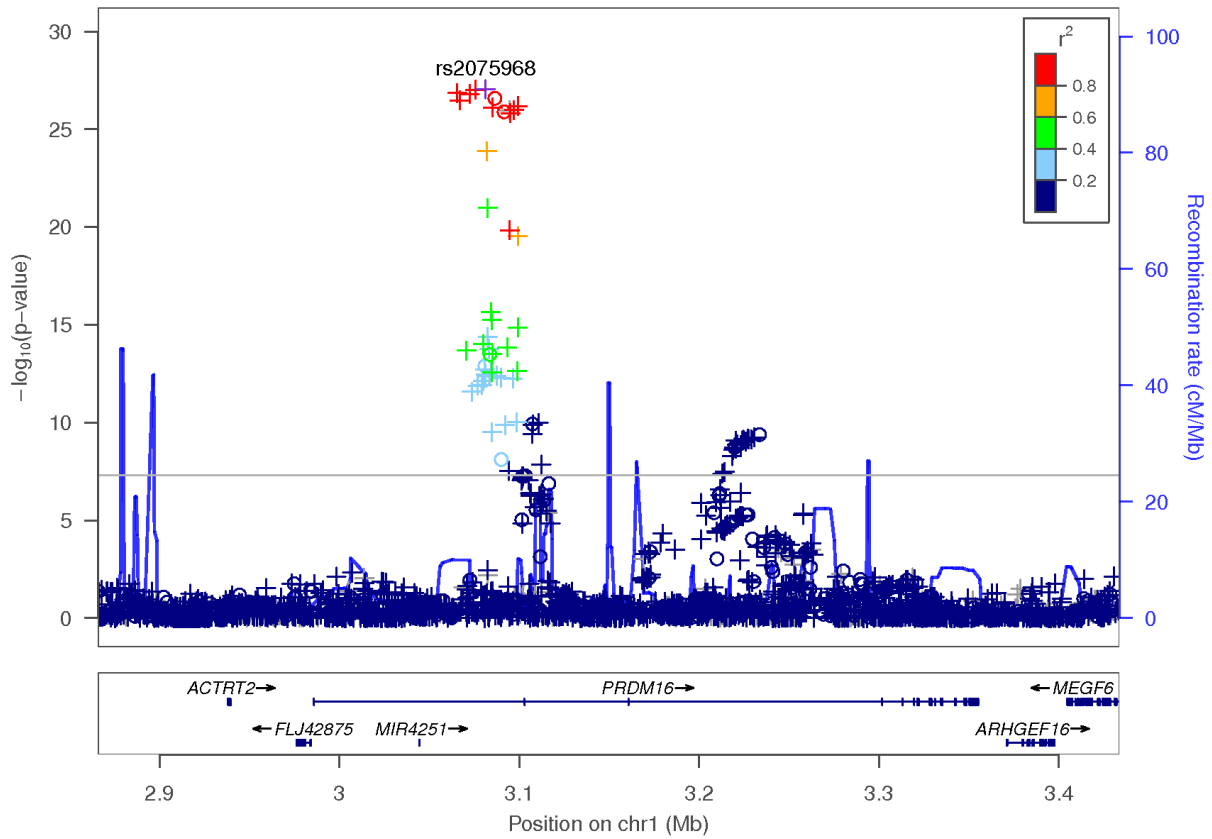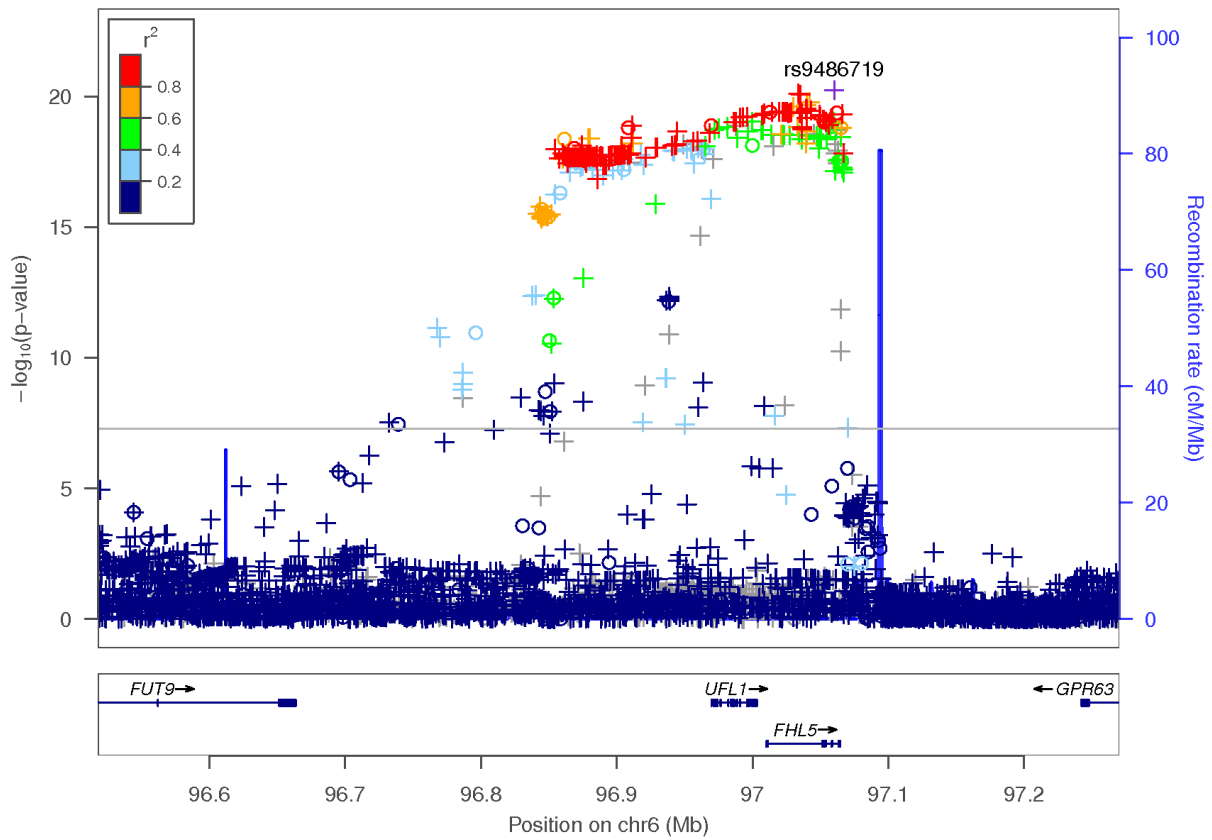



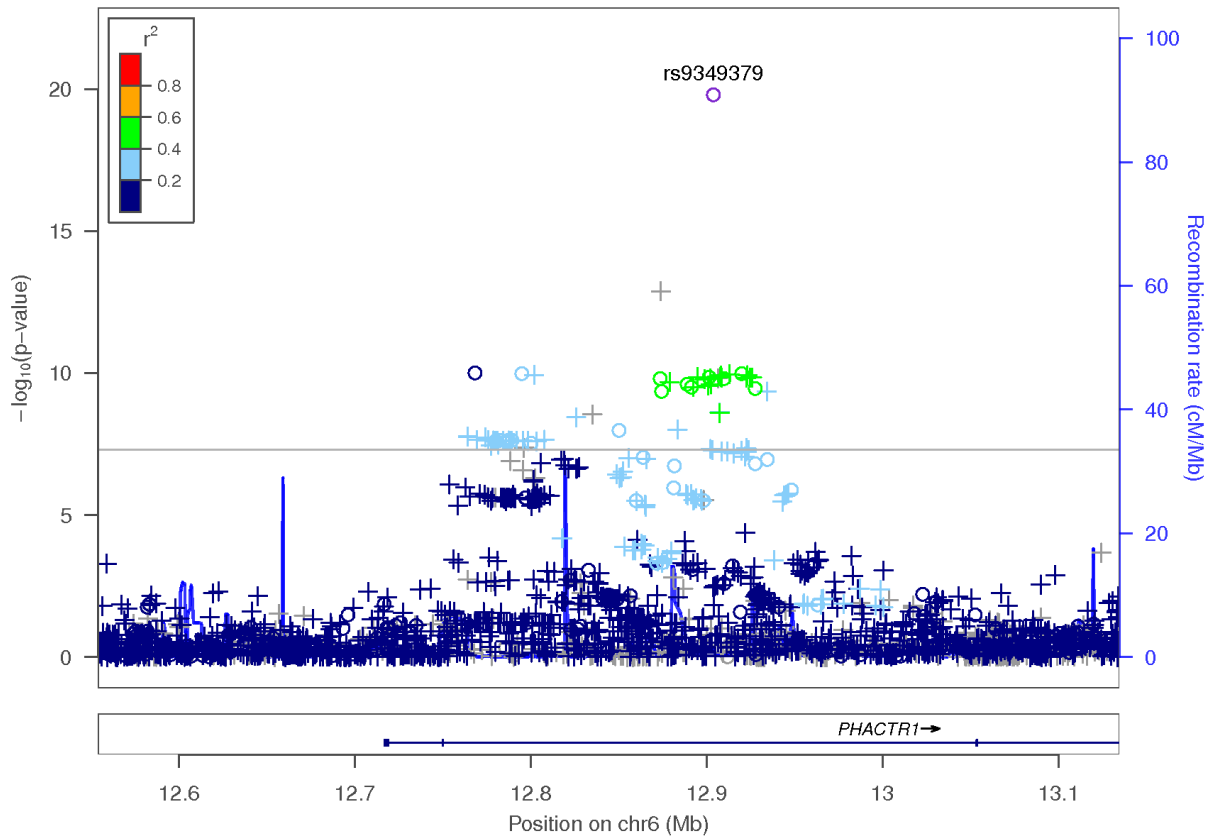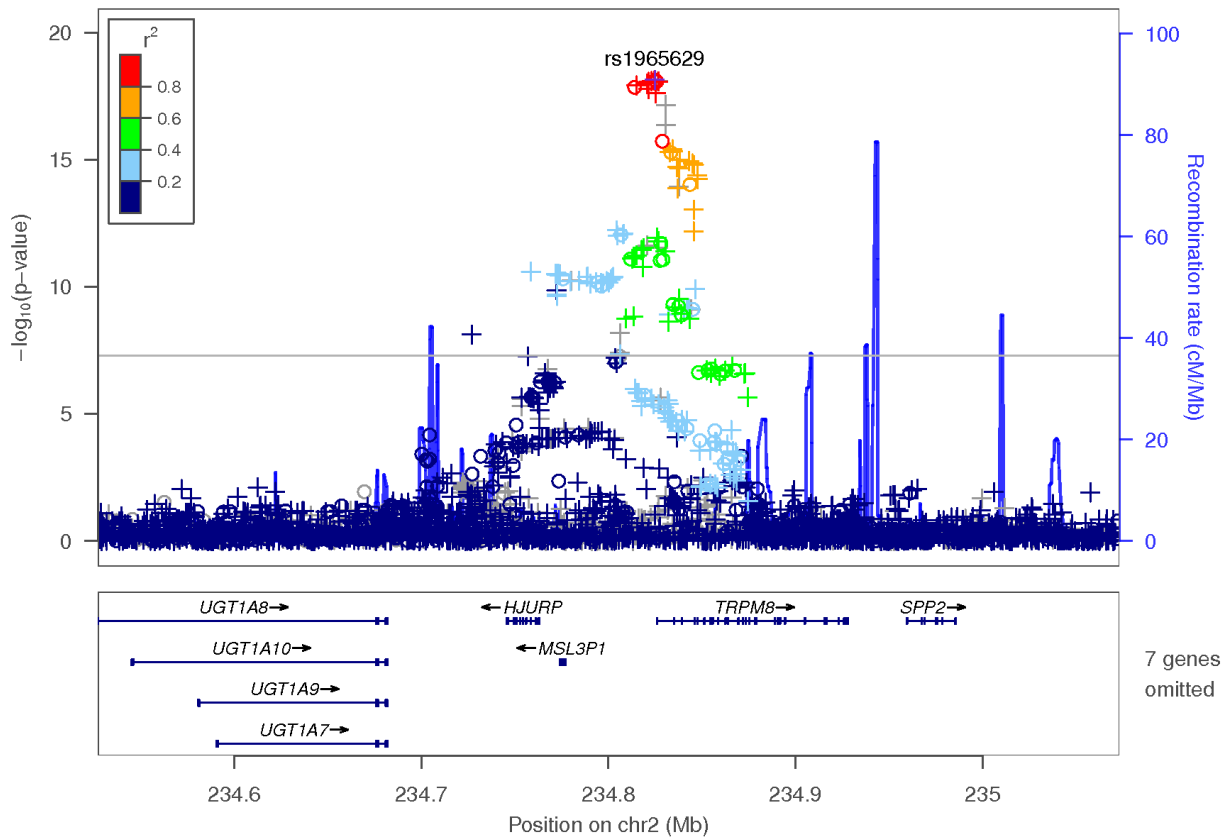

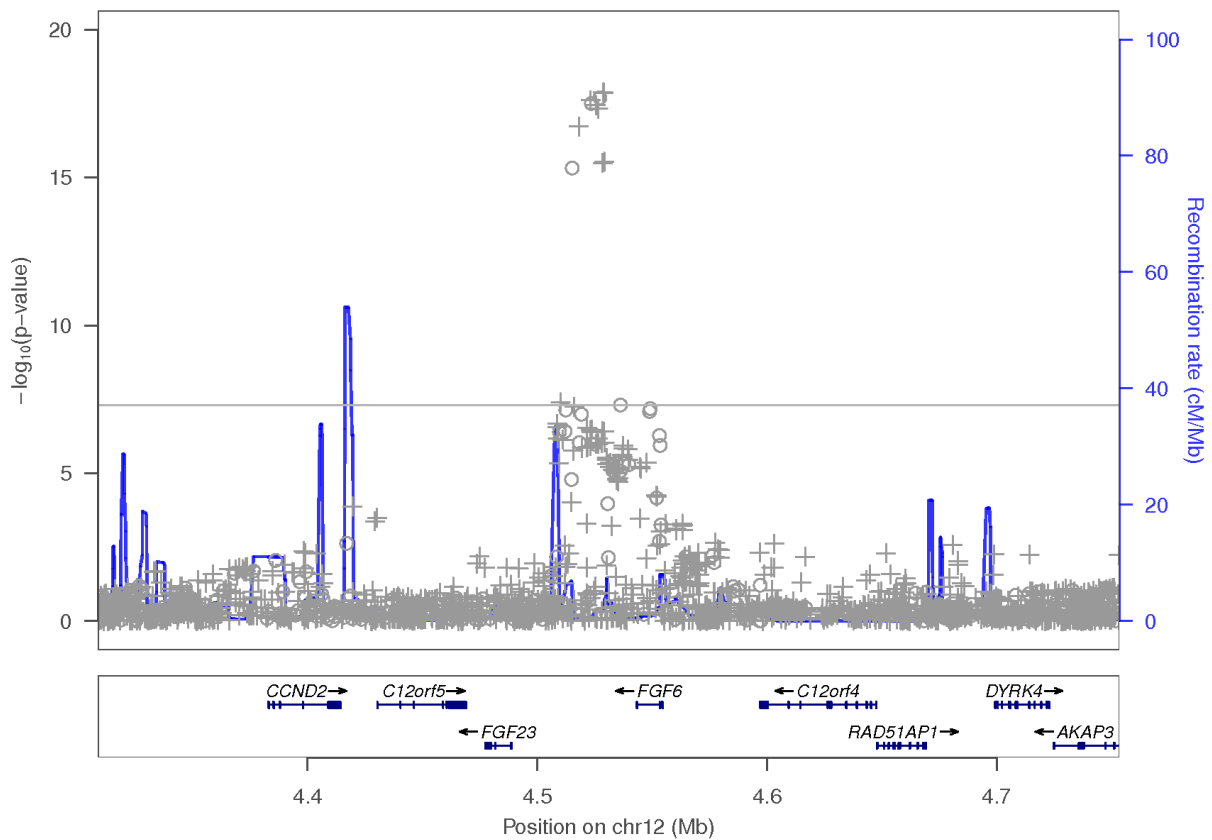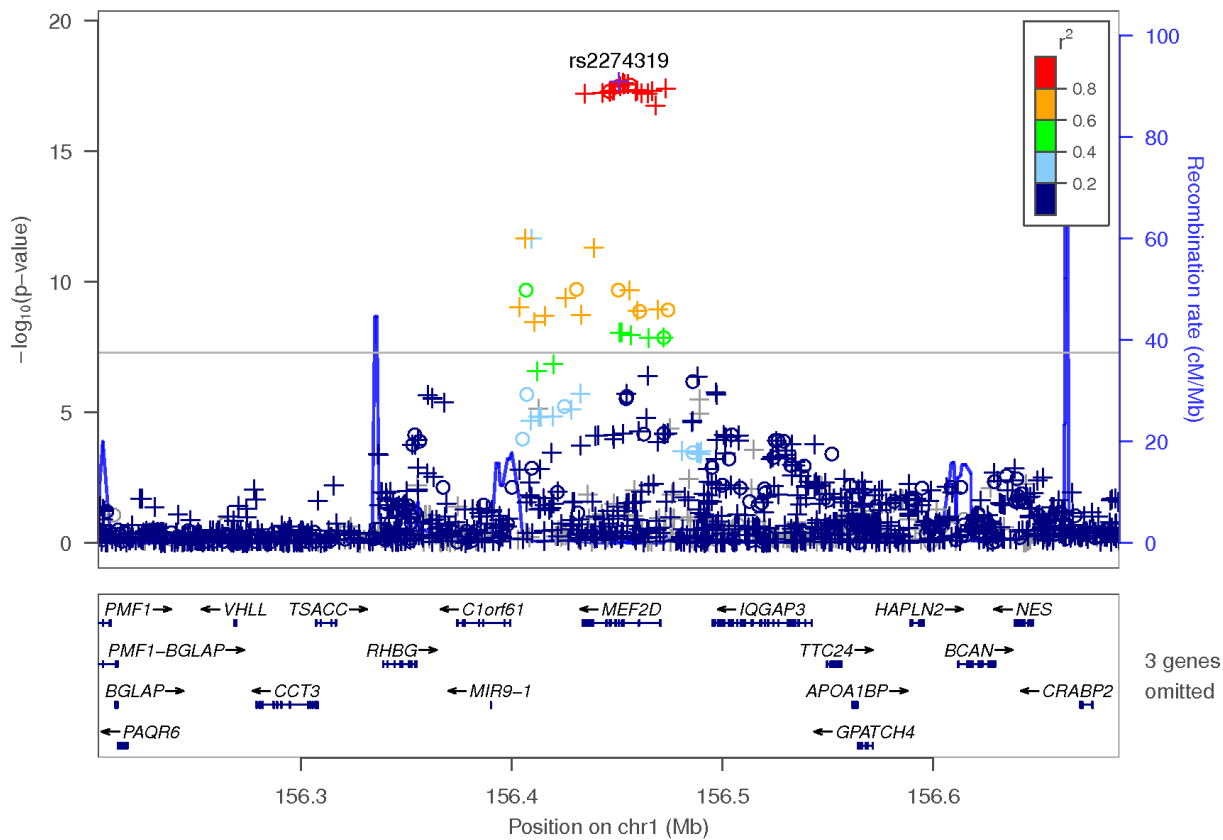

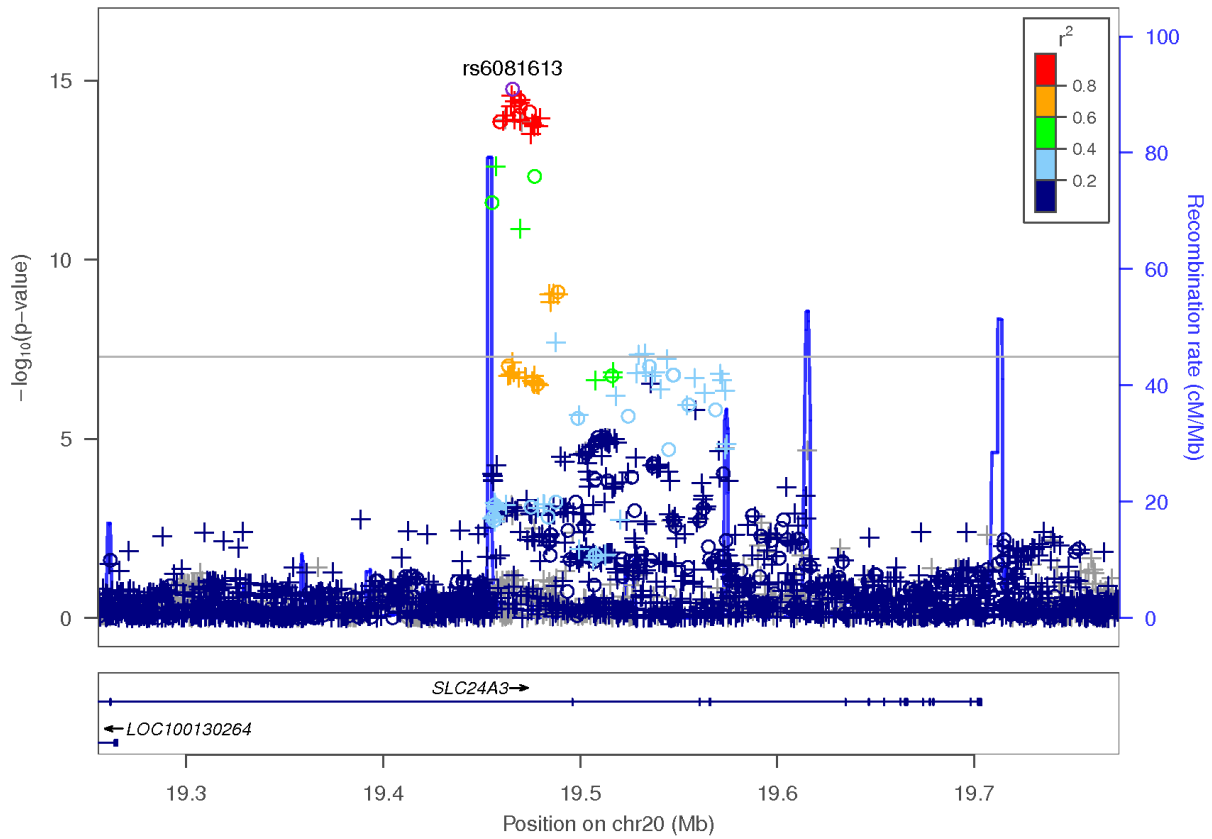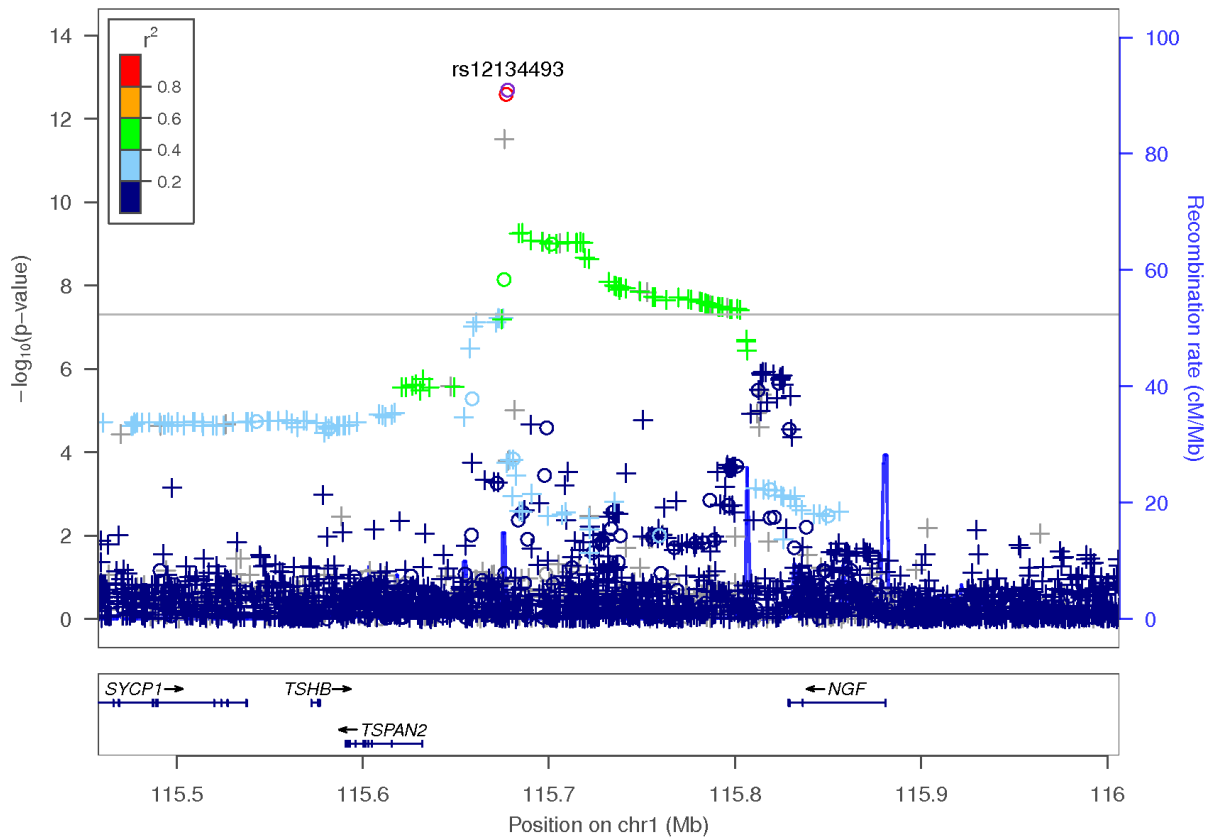

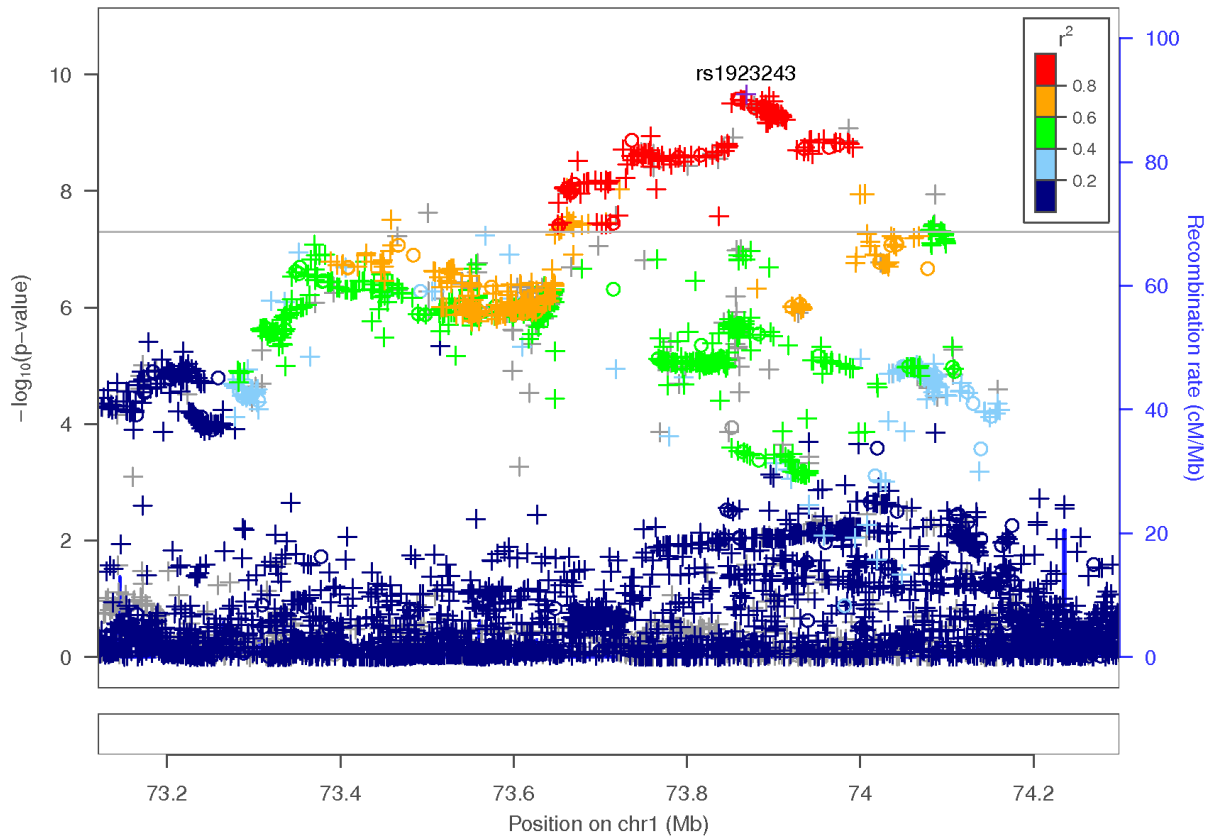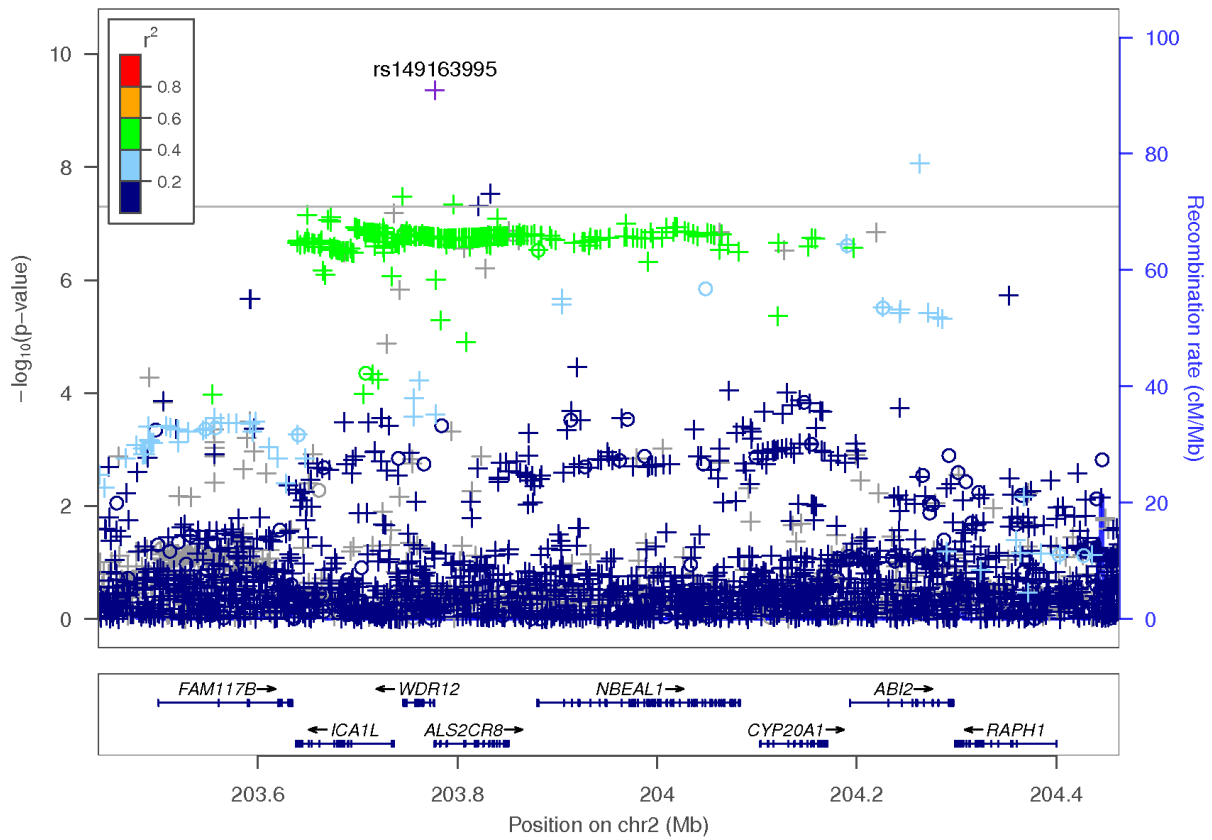

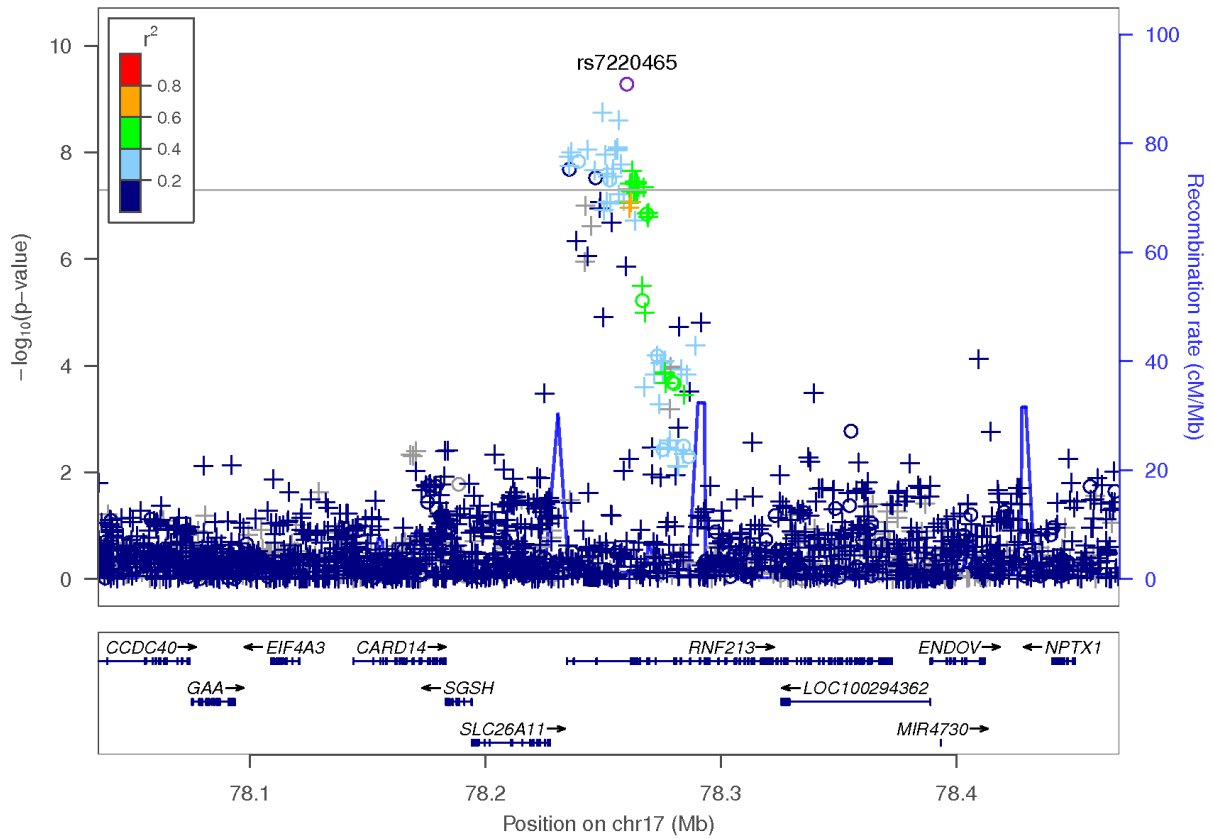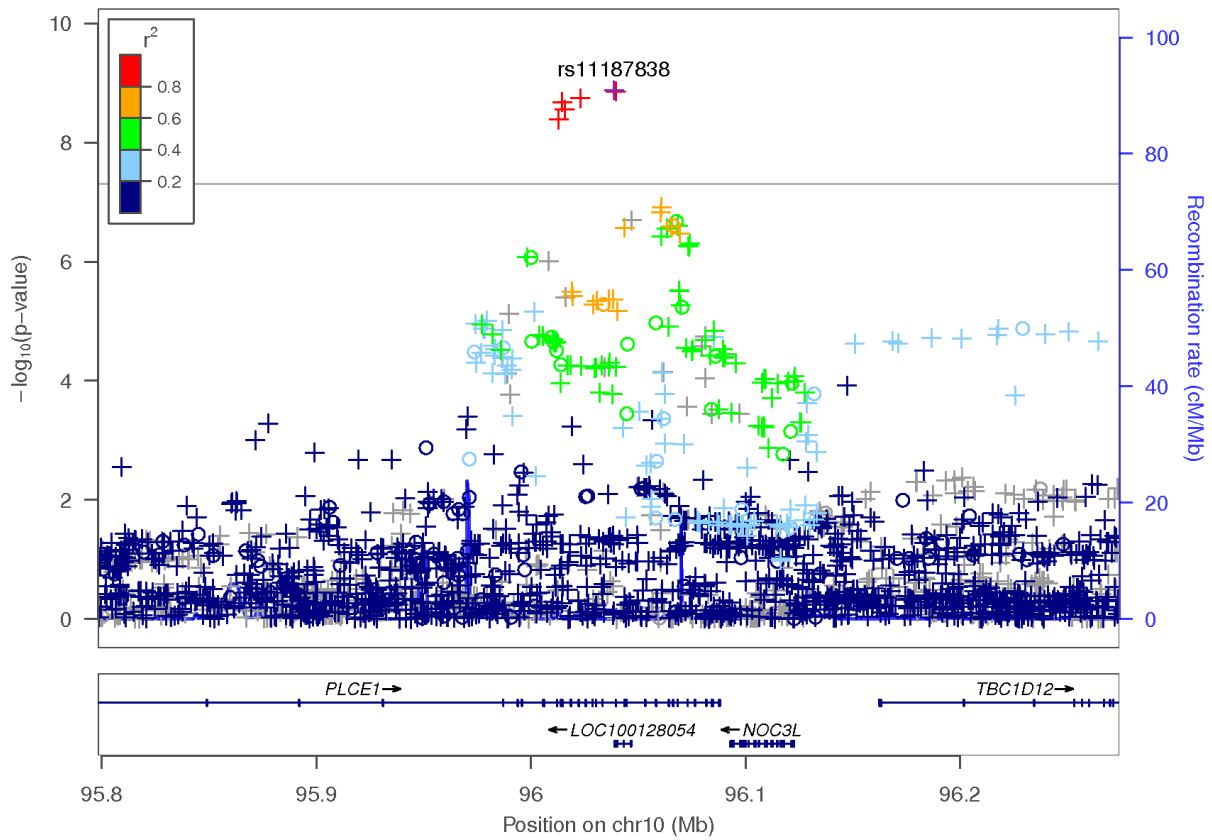

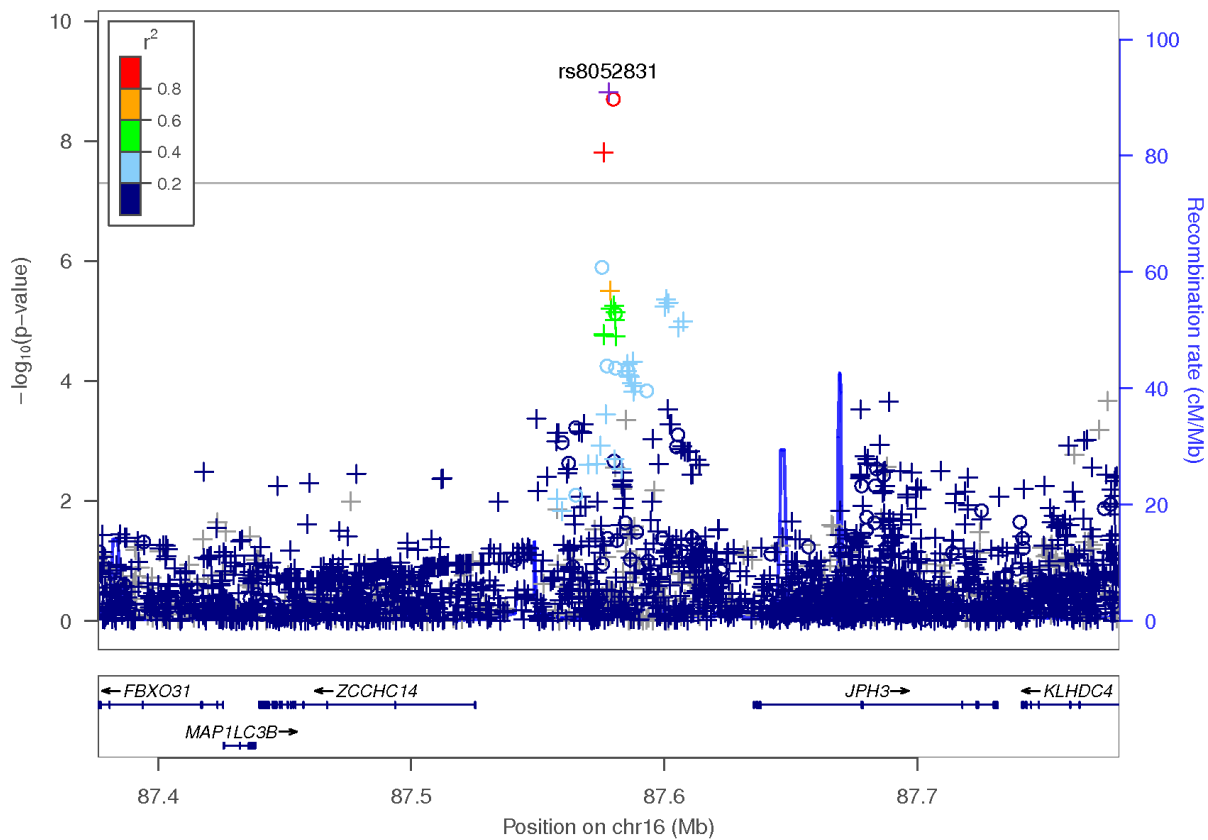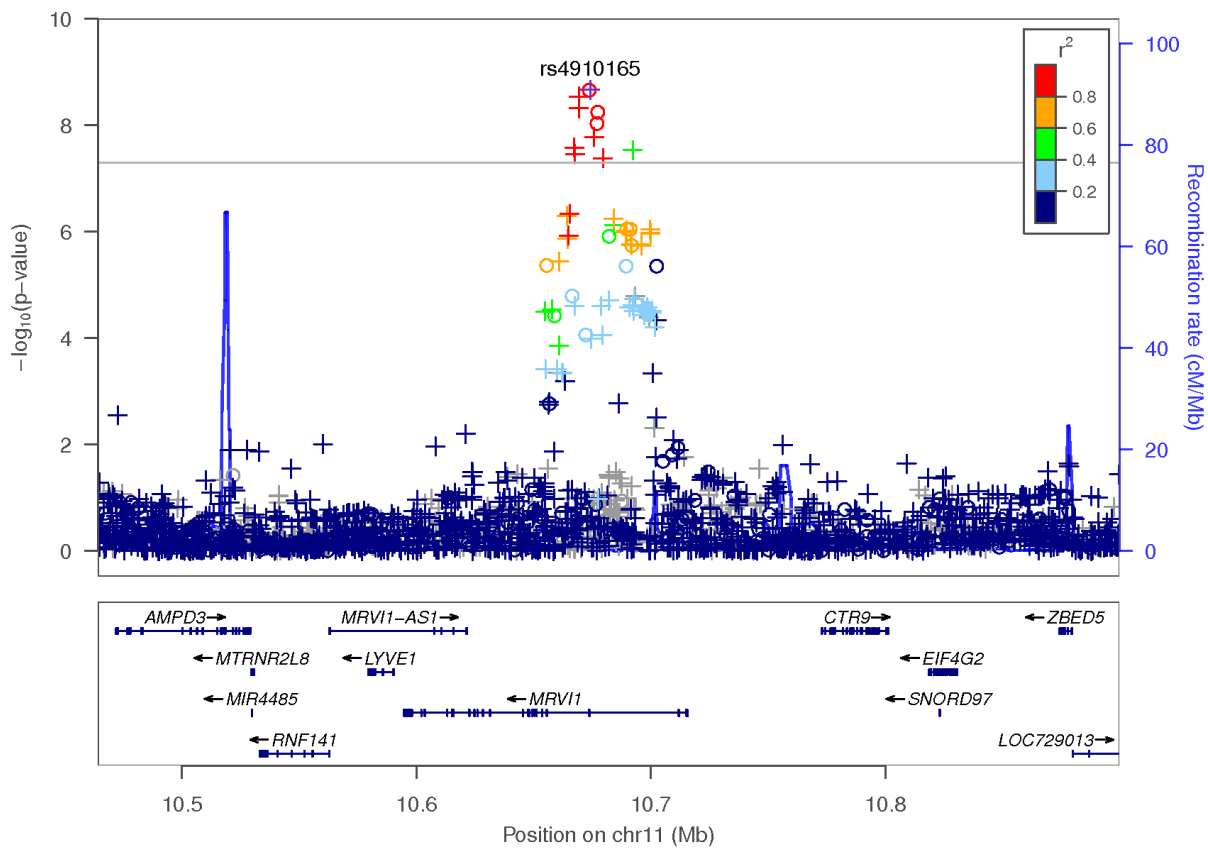

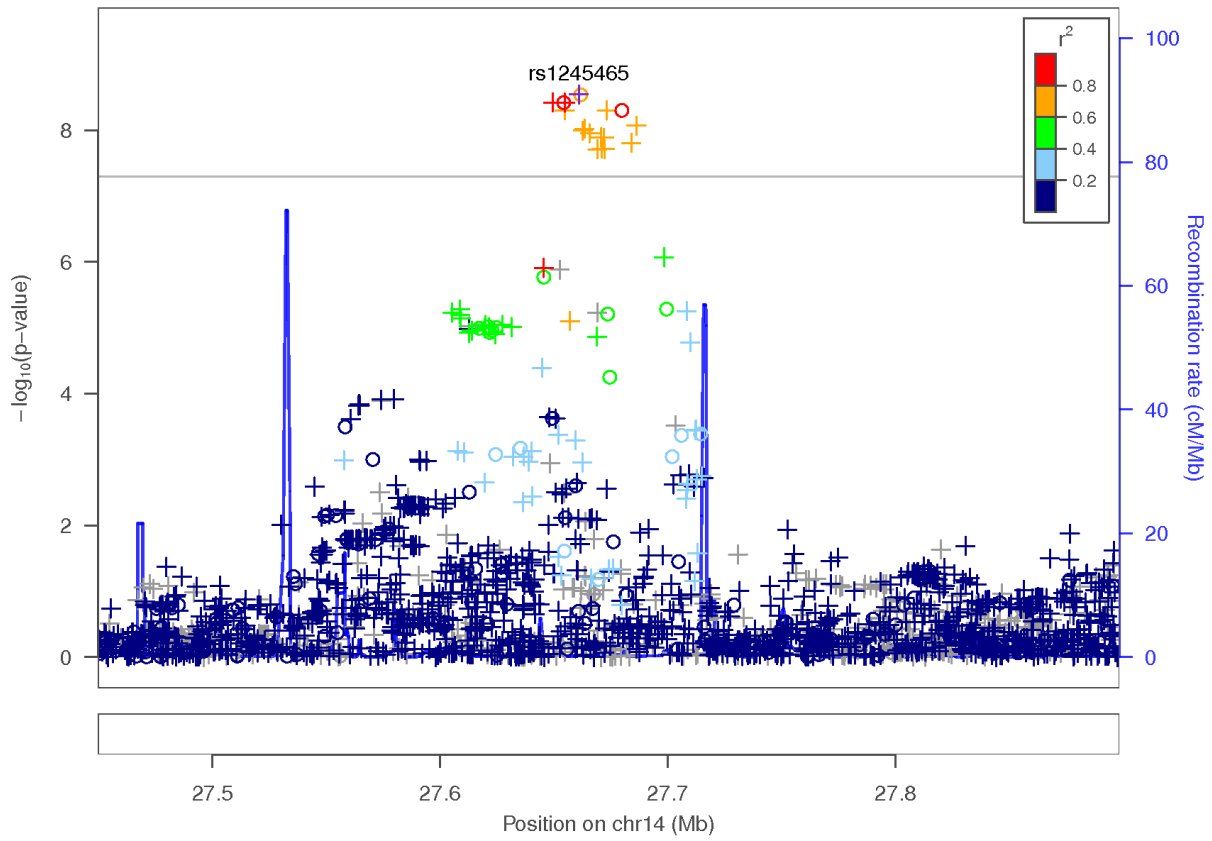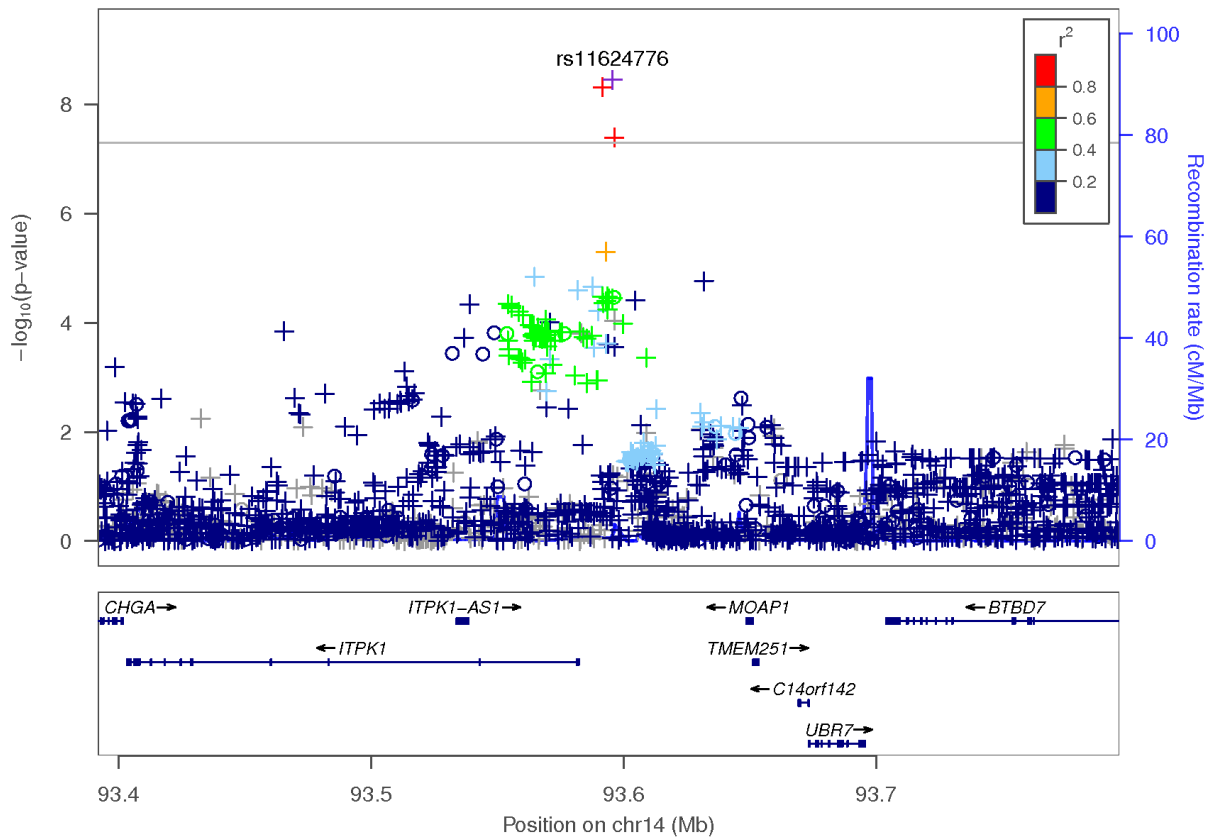

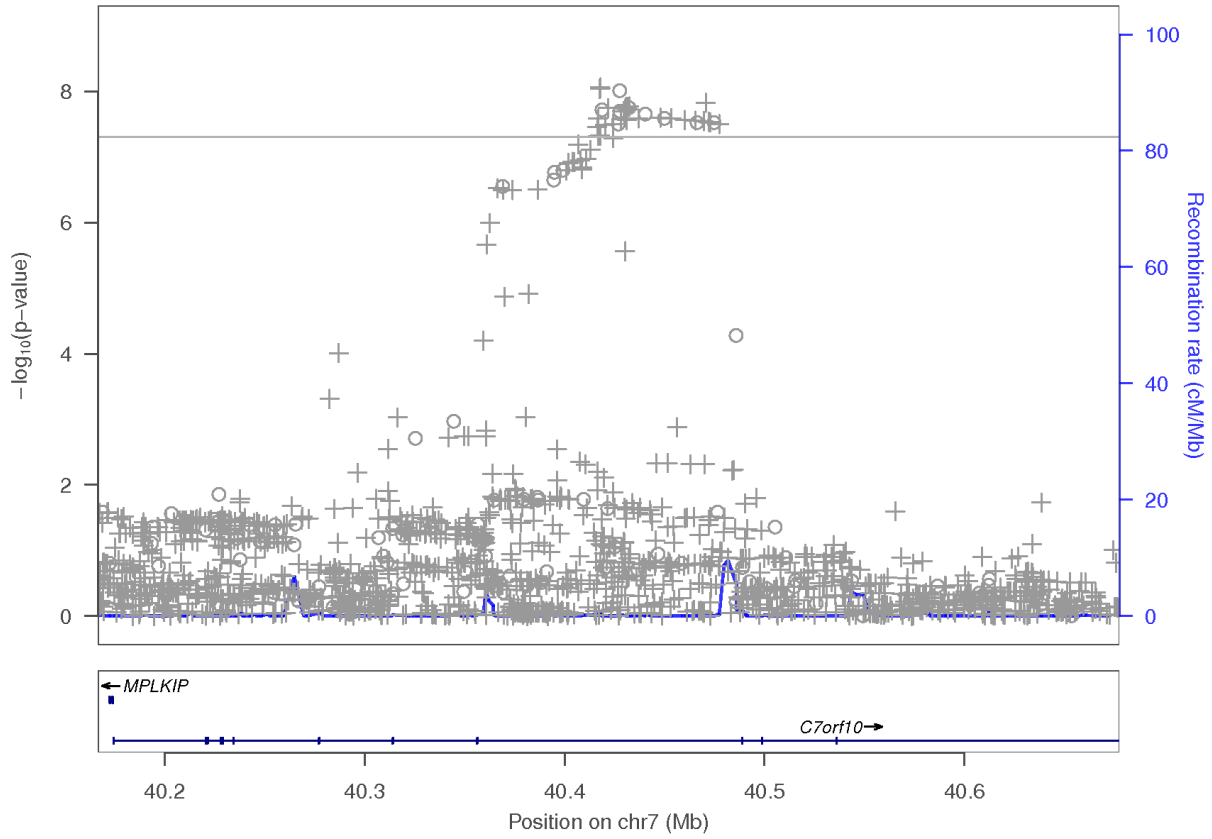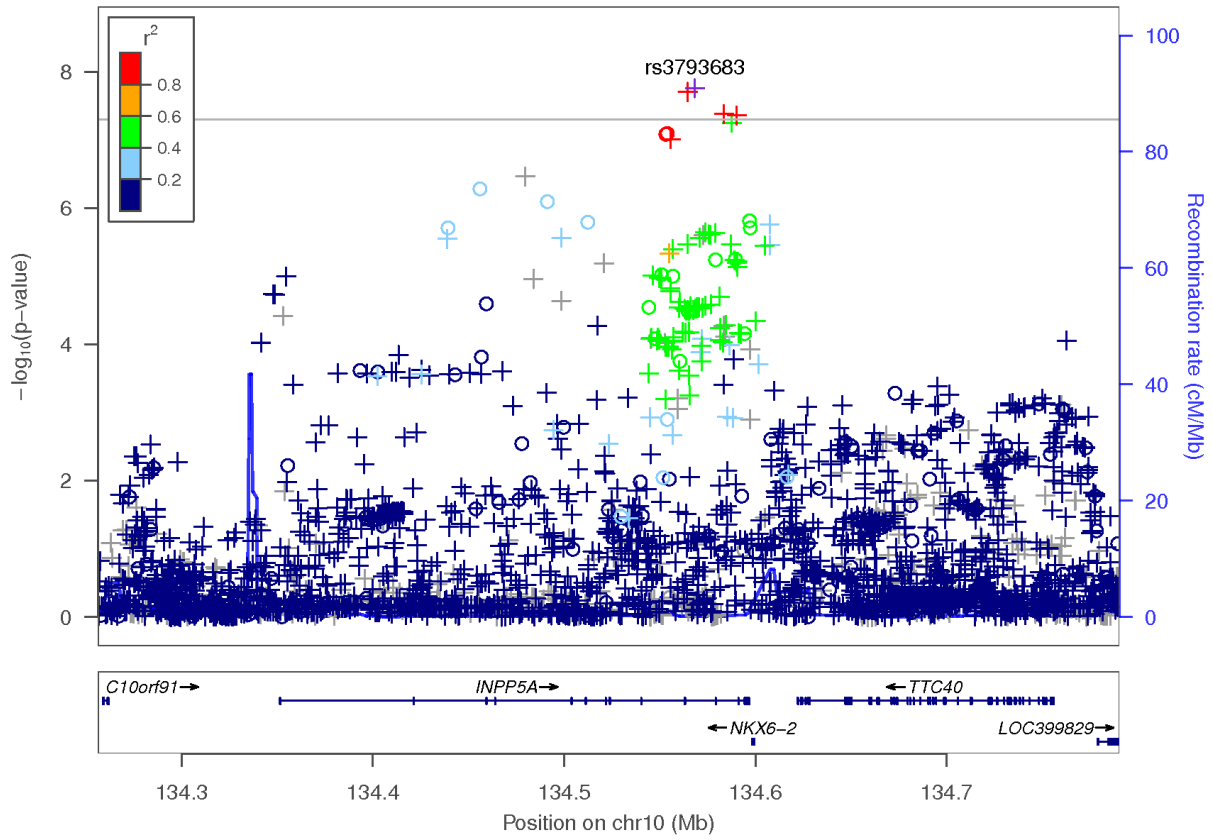



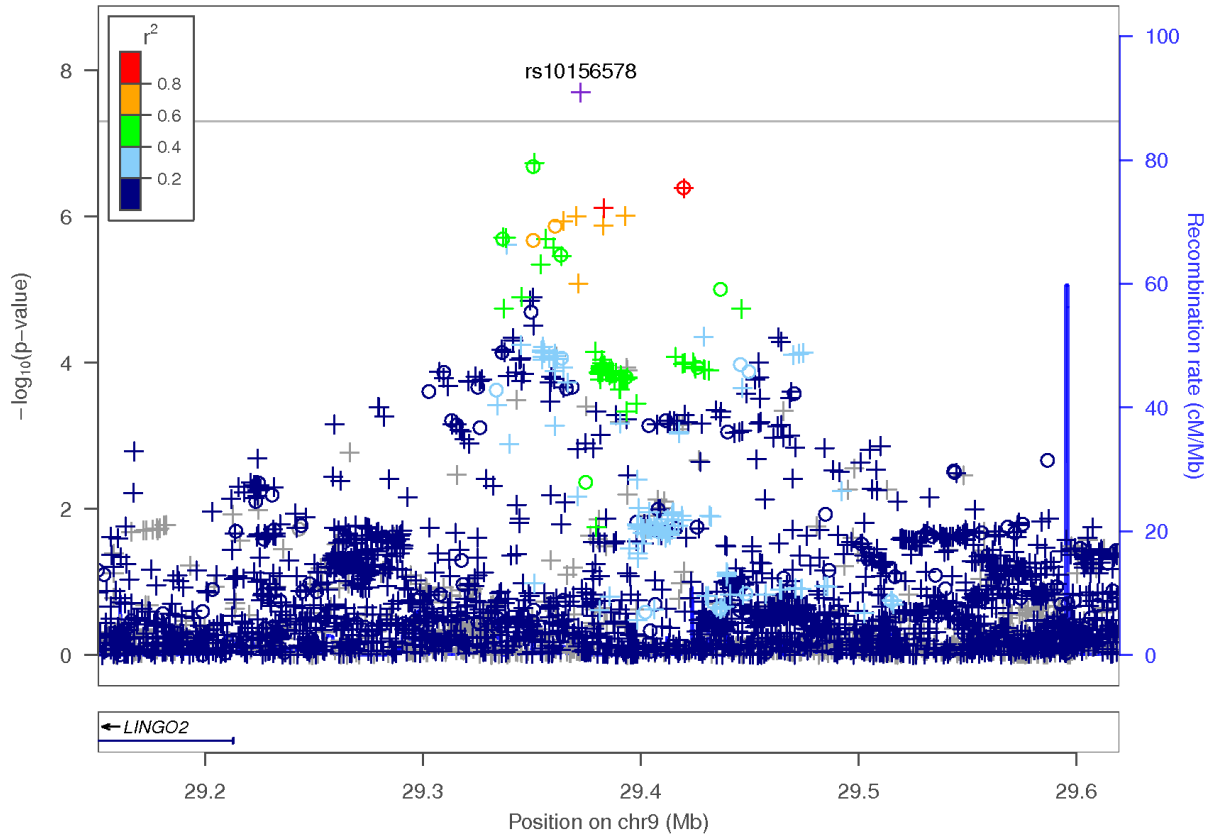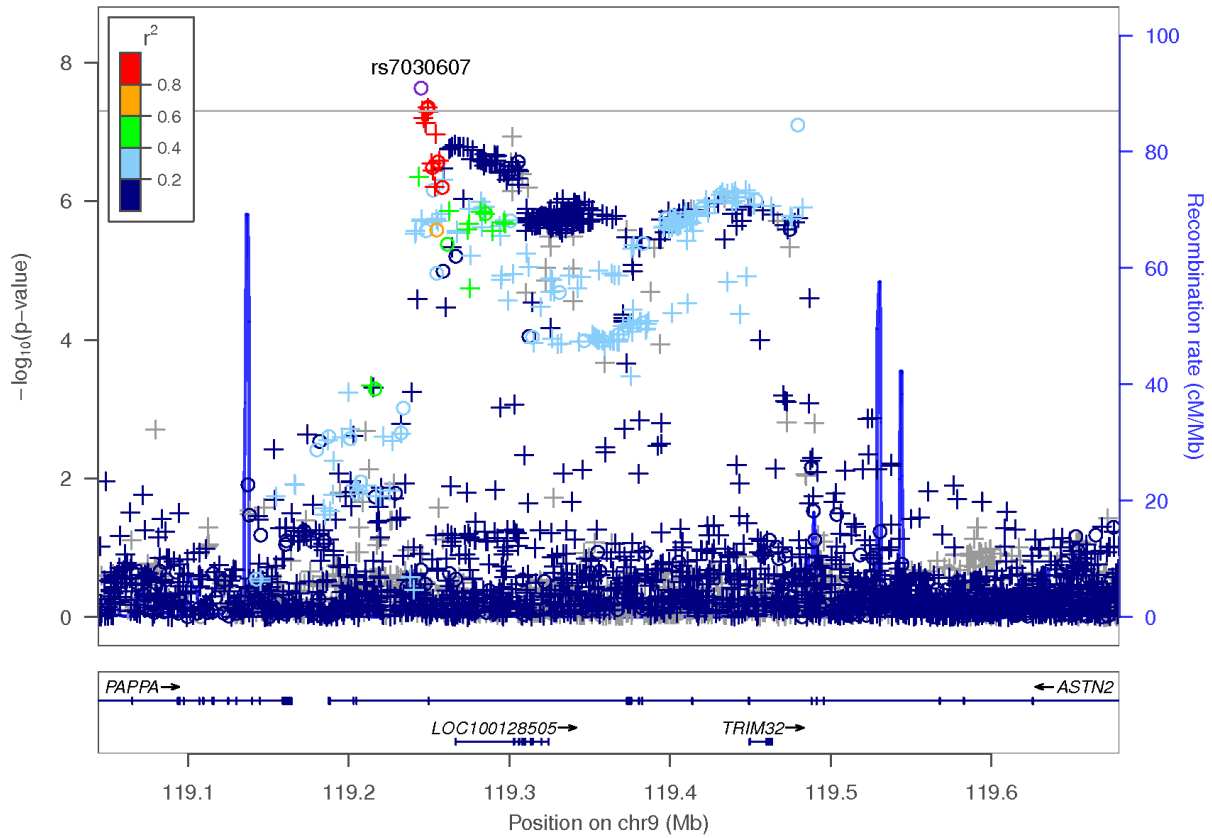

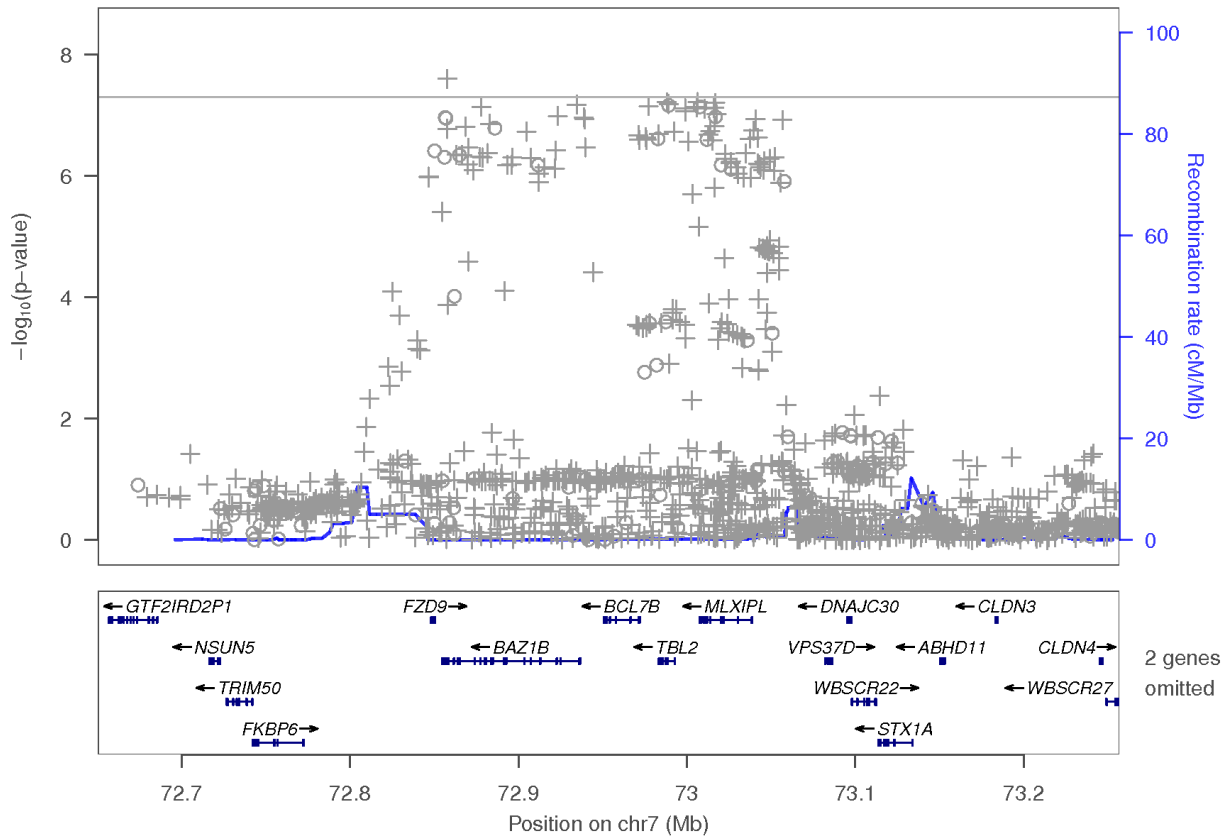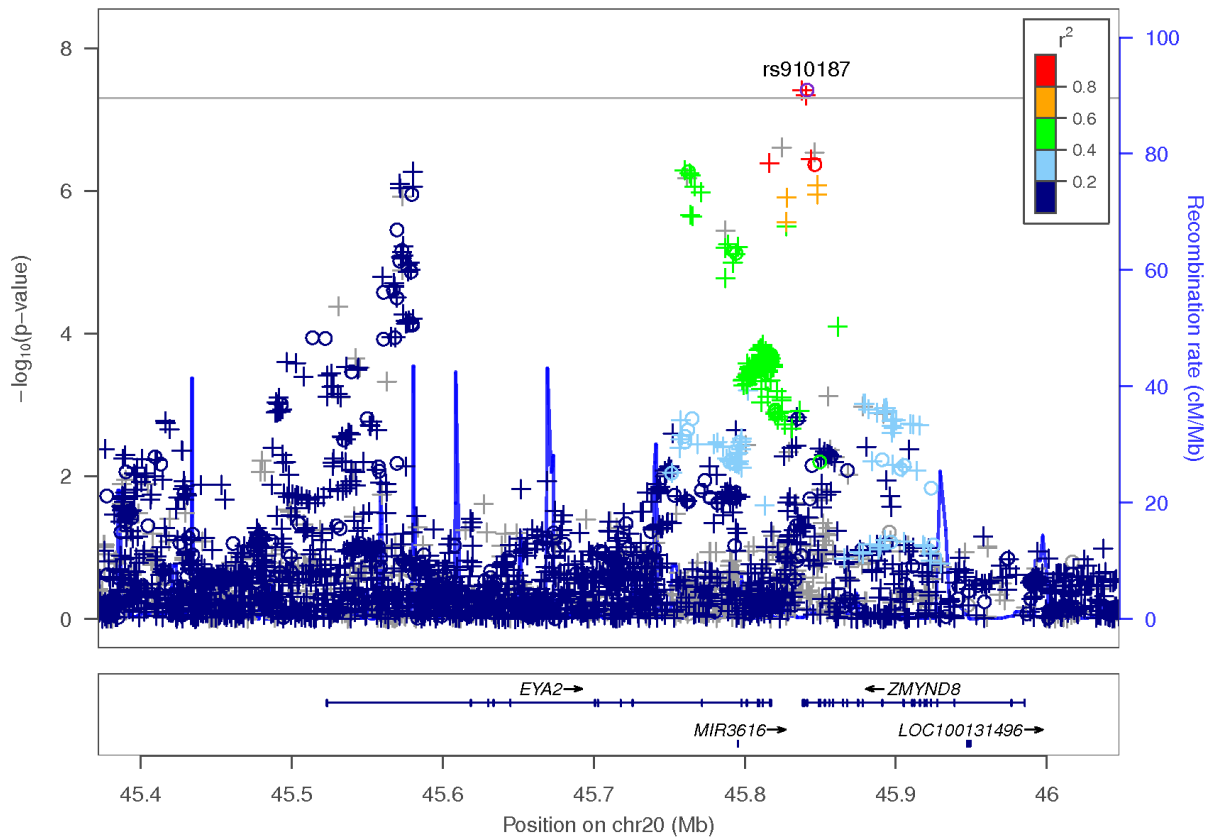

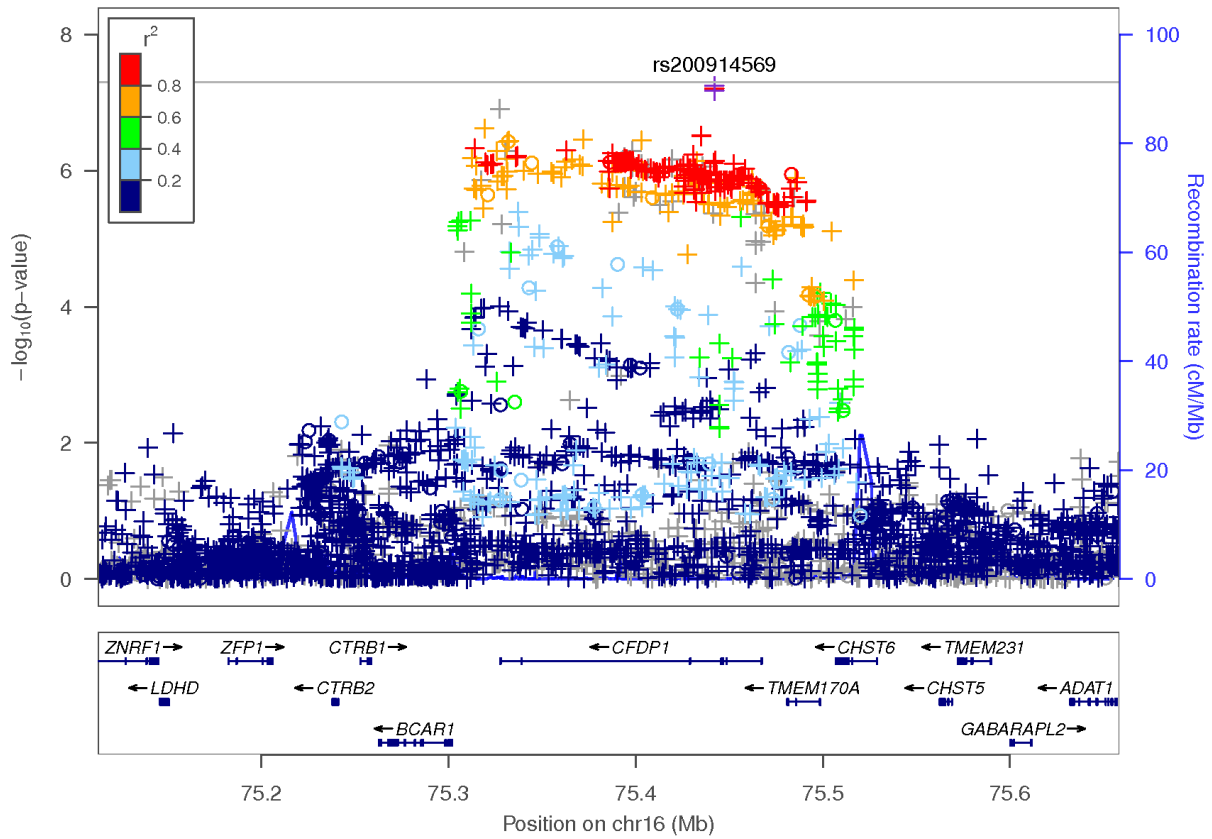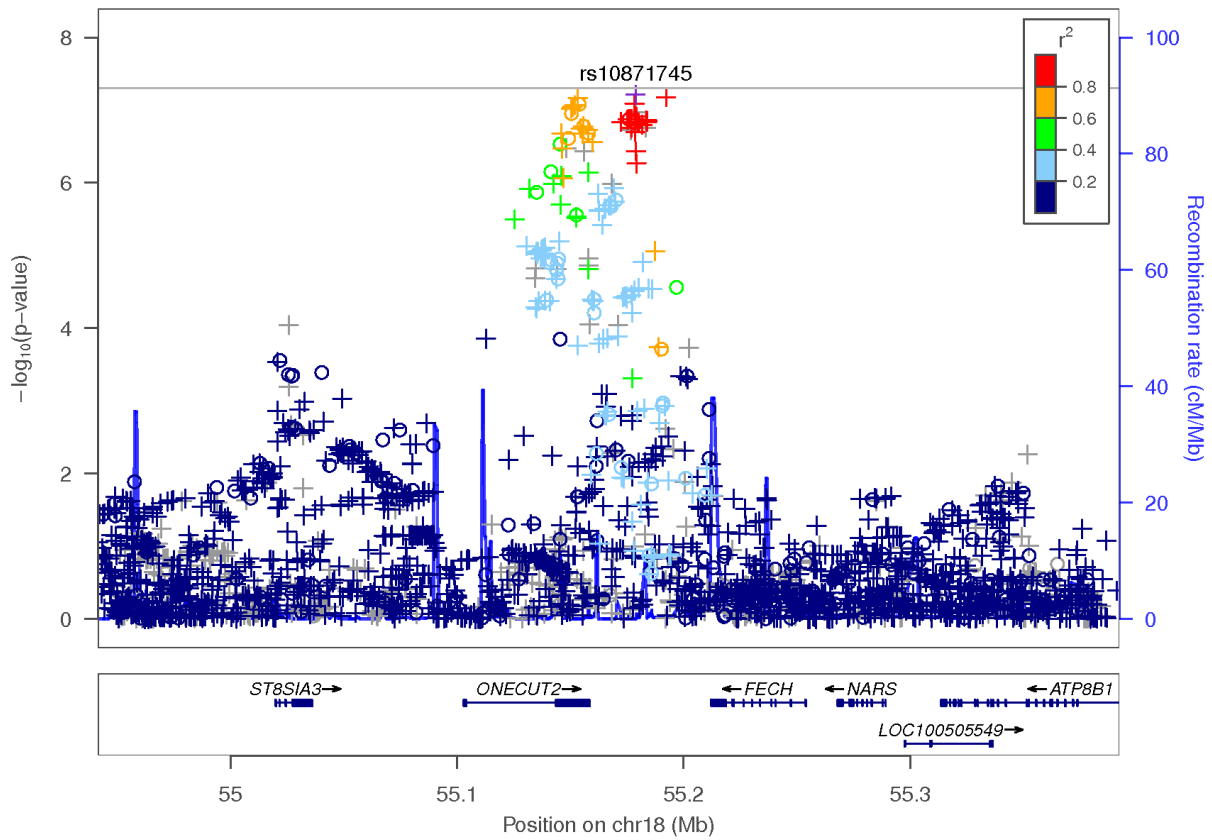

Supplement: NIHMS780506-supplement-12.pdf [file NIHMS780506-supplement-12.pdf]
