# Supplementary material
Source: PubMed Central journal article supplement (PMC5207801)

# Analysis Summary: Nearsightedness

## Phenotype Description

Nearsightedness cases are defined as having said "Yes" or checking nearsightedness to one of the following questions.

- Your Medical History ("Have you ever been diagnosed by a doctor with nearsightedness (near objects are clear, far objects are blurry)?" Yes)
- Research Snippets ("Are you nearsighted (near objects are clear, far objects are blurry)?" Yes)
- Refractive Error ("What vision problems do you have? Please check all that apply." Nearsightedness (near objects are clear, far objects are blurry))
- Refractive Error ("Prior to your LASIK eye surgery, what vision problems did you have? Please check all that apply." Nearsightedness (near objects are clear, far objects are blurry))

Controls are defined as having said "No" or not checking nearsightedness to at least one of the questions above. Discordant answers are removed.

## Phenotype Statistics

The following table shows demographics of unrelated, European individuals included in the GWAS.

| Phenotype       | Group   | Total  | M     | F     | (0,30] | (30,45] | (45,60] | (60,Inf] |
|-----------------|---------|--------|-------|-------|--------|---------|---------|----------|
| nearsightedness | case    | 106086 | 53935 | 52151 | 15103  | 33066   | 29503   | 28414    |
|                 | control | 85757  | 47488 | 38269 | 12935  | 24222   | 21975   | 26625    |

The following table shows the phenotypic distribution across 23andMe genotyping platforms for individuals included in the GWAS.

| Phenotype       | Group   | Total  | v1/v2 | v3    | v4    |
|-----------------|---------|--------|-------|-------|-------|
| nearsightedness | case    | 106086 | 8140  | 82499 | 15447 |
|                 | control | 85757  | 6072  | 66218 | 13467 |

## Null Model with Covariates

The following table shows results of fitting a model for the trait based on just the covariates. Principal coordinates have been standardized, so these effect sizes are in units of standard deviations.

|      | Estimate | Std. Error | z value | Pr(> z )              | LRT   | Pr(>Chi)              |
|------|----------|------------|---------|-----------------------|-------|-----------------------|
| age  | -0.00489 | 0.000287   | -17.1   | $3.1 \times 10^{-65}$ | 291.4 | $2.5 \times 10^{-65}$ |
| sexF | 0.19536  | 0.009255   | 21.1    | $6.5 \times 10^{-99}$ | 446.4 | $4.3 \times 10^{-99}$ |
| pc.0 | -0.03665 | 0.004638   | -7.9    | $2.7 \times 10^{-15}$ | 62.8  | $2.3 \times 10^{-15}$ |
| pc.1 | 0.03886  | 0.004648   | 8.4     | $6.2 \times 10^{-17}$ | 70.2  | $5.3 \times 10^{-17}$ |
| pc.2 | -0.01167 | 0.004623   | -2.5    | 0.012                 | 6.4   | 0.012                 |
| pc.3 | 0.02378  | 0.004604   | 5.2     | $2.4 \times 10^{-7}$  | 26.7  | $2.4 \times 10^{-7}$  |
| pc.4 | 0.03085  | 0.004601   | 6.7     | $2.0 \times 10^{-11}$ | 44.7  | $2.2 \times 10^{-11}$ |

## SNP-level QC information

The following table shows results for QC filters on the genotyped data:

|                         | failed | passed  |
|-------------------------|--------|---------|
| no filters              | 0      | 1030430 |
| not V1-only, chrM, chrY | 4790   | 1025640 |
| parent-offspring test   | 2129   | 1023511 |
| MAF > 0%                | 3203   | 1020494 |
| HWE > 1e-20             | 48225  | 972832  |
| gt.rate > 90%           | 30775  | 952826  |
| batch effects           | 28267  | 945446  |

The following table shows results for QC filters on the imputed dosage data:

|            | failed | passed   |
|------------|--------|----------|
| no filters | 0      | 13733809 |
| MAF > 0%   | 0      | 13733809 |

imputation quality      0 13733809  
 batch effects            2168 13731641

The following table shows results for QC filters on the merged association test results:

|                    | passed   | total    |
|--------------------|----------|----------|
| imputed only       | 12833621 | 12833621 |
| both passed        | 898002   | 13731623 |
| genotyped only     | 47444    | 13779067 |
| no test result     | -5807    | 13773260 |
| failed to converge | -10335   | 13762925 |

## Genetic Association Tests

We performed logistic regression assuming an additive model for allelic effects, using the model:

$$\text{nearsightedness} \sim \text{age} + \text{sex} + \text{pc.0} + \text{pc.1} + \text{pc.2} + \text{pc.3} + \text{pc.4} + \text{genotype}$$

This genome-wide association analysis includes data from 106086 cases and 85757 controls of European ancestry, filtered to remove close relatives.

The results in this report have been adjusted for a genomic control inflation factor  $\lambda=1.230$ . The equivalent inflation factor for 1000 cases and 1000 controls  $\lambda_{1000}=1.002$ , and for 10000,  $\lambda_{10000}=1.024$ .

## Manhattan Plot

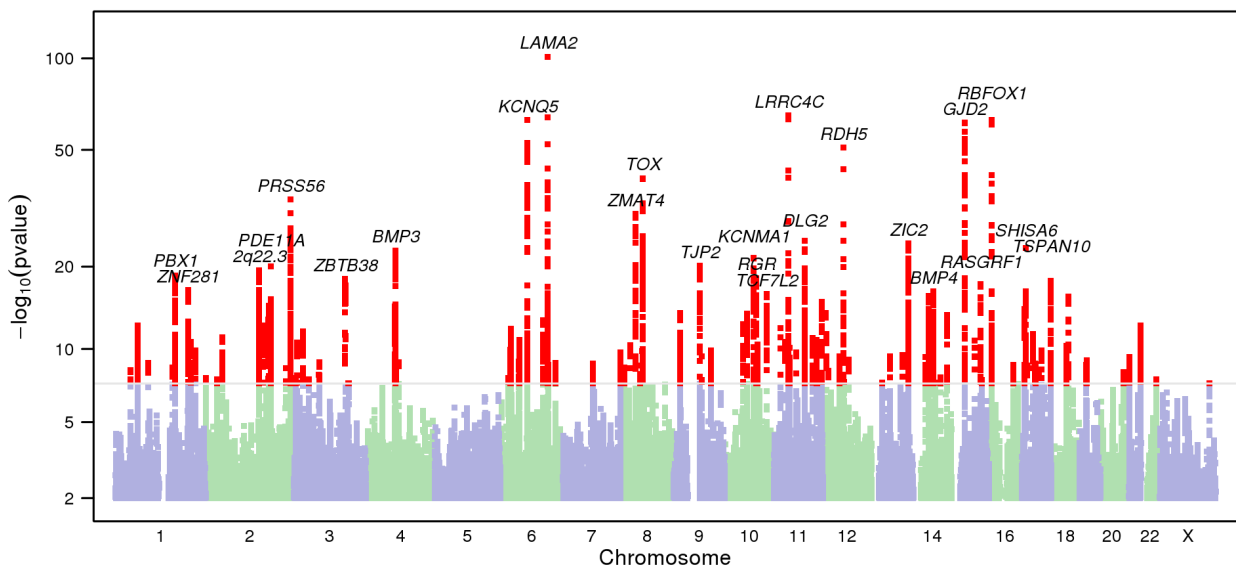

## Q-Q Plot of GWAS Results

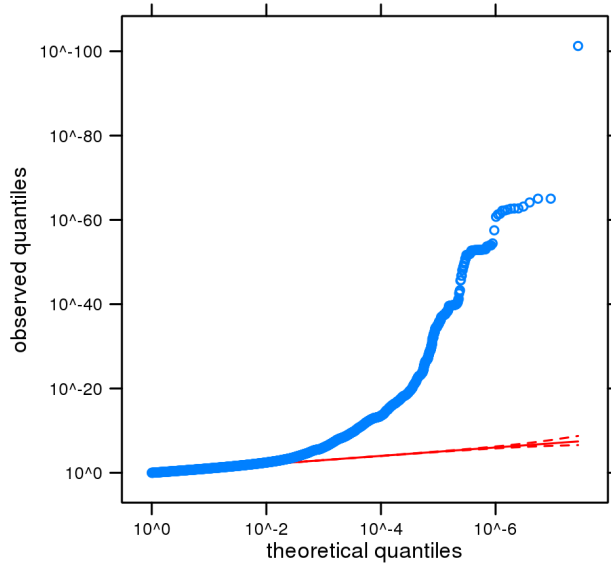

## Index SNPs for Strongest Associations

| cytoband | assay.name  | scaffold | position  | alleles | src | pvalue                 | OR    | 95% CI        | gene.context                |
|----------|-------------|----------|-----------|---------|-----|------------------------|-------|---------------|-----------------------------|
| 6q22.33  | rs12193446  | chr6     | 129820038 | A/G     | I   | $5.4 \times 10^{-102}$ | 0.769 | [0.751,0.788] | [LAMA2]                     |
| 11p12    | rs11606250  | chr11    | 40149300  | A/G     | I   | $9.2 \times 10^{-66}$  | 0.845 | [0.829,0.862] | [LRRC4C]                    |
| 6q13     | rs7744813   | chr6     | 73643289  | A/C     | I   | $1.9 \times 10^{-63}$  | 0.883 | [0.871,0.896] | [KCNQ5]                     |
| 16p13.3  | rs10500355  | chr16    | 7459347   | A/T     | I   | $2.0 \times 10^{-63}$  | 0.881 | [0.868,0.894] | [RFX1]                      |
| 15q14    | rs524952    | chr15    | 35005886  | A/T     | I   | $3.5 \times 10^{-62}$  | 0.886 | [0.874,0.899] | GOLGA8B---[]--GJD2          |
| 12q13.2  | rs3138141   | chr12    | 56115778  | A/C     | I   | $1.5 \times 10^{-51}$  | 1.146 | [1.126,1.167] | [RDH5]                      |
| 8q12.1   | rs10089517  | chr8     | 60178721  | A/C     | I   | $6.0 \times 10^{-41}$  | 1.107 | [1.091,1.124] | TOX---[]---CA8              |
| 2q37.1   | rs1550094   | chr2     | 233385396 | A/G     | I   | $9.2 \times 10^{-35}$  | 1.102 | [1.085,1.119] | [PRSS56]                    |
| 8p11.21  | rs869422    | chr8     | 40723970  | A/G     | I   | $4.0 \times 10^{-31}$  | 0.903 | [0.887,0.918] | [ZMAT4]                     |
| 11q14.1  | rs2155413   | chr11    | 84634790  | A/C     | I   | $2.3 \times 10^{-25}$  | 0.927 | [0.914,0.941] | [DLG2]                      |
| 13q32.3  | rs9585327   | chr13    | 100689354 | A/G     | I   | $8.9 \times 10^{-25}$  | 0.928 | [0.915,0.941] | ZIC2--[]--PCCA              |
| 17p12    | rs2908972   | chr17    | 11407259  | A/T     | I   | $5.3 \times 10^{-24}$  | 0.927 | [0.914,0.941] | [SHISA6]                    |
| 4q21.21  | rs5022942   | chr4     | 81959966  | A/G     | I   | $1.6 \times 10^{-23}$  | 0.917 | [0.901,0.932] | [BMP3]                      |
| 10q22.3  | rs10824518  | chr10    | 79063542  | A/T     | I   | $3.3 \times 10^{-22}$  | 0.929 | [0.916,0.943] | [KCNMA1]                    |
| 9q21.11  | rs11145488  | chr9     | 71770939  | A/G     | I   | $6.7 \times 10^{-21}$  | 0.920 | [0.904,0.936] | FXN--[]--TJP2               |
| 2q31.2   | rs17400325  | chr2     | 178565913 | C/T     | I   | $9.6 \times 10^{-21}$  | 0.844 | [0.814,0.875] | [PDE11A]                    |
| 2q22.3   | rs61049169  | chr2     | 146888708 | A/G     | I   | $3.4 \times 10^{-20}$  | 1.070 | [1.054,1.085] | []                          |
| 1q23.3   | rs1556867   | chr1     | 164213686 | C/T     | I   | $2.7 \times 10^{-19}$  | 1.080 | [1.062,1.098] | NUF2---[]---PBX1            |
| 10q23.1  | rs10887265  | chr10    | 86015573  | C/G     | I   | $5.6 \times 10^{-19}$  | 0.931 | [0.917,0.946] | [RGR]                       |
| 3q23     | rs9866391   | chr3     | 141076084 | C/T     | I   | $7.7 \times 10^{-19}$  | 1.069 | [1.053,1.084] | [ZBTB38]                    |
| 17q25.3  | rs9747347   | chr17    | 79606820  | C/T     | I   | $1.6 \times 10^{-18}$  | 1.074 | [1.057,1.092] | NPLOC4-[]-TSPAN10           |
| 15q25.1  | rs13380104  | chr15    | 79378821  | C/T     | I   | $4.3 \times 10^{-18}$  | 1.066 | [1.051,1.082] | [RASGRF1]                   |
| 1q32.1   | rs2808510   | chr1     | 200336075 | C/T     | I   | $3.1 \times 10^{-17}$  | 1.065 | [1.049,1.081] | NR5A2---[]--ZNF281          |
| 14q22.2  | rs2181346   | chr14    | 54552428  | A/T     | I   | $4.7 \times 10^{-17}$  | 1.079 | [1.060,1.098] | BMP4---[]---CDKN3           |
| 10q25.2  | rs56299331  | chr10    | 114788436 | C/T     | I   | $1.1 \times 10^{-16}$  | 1.078 | [1.059,1.098] | [TCF7L2]                    |
| 14q21.1  | rs34217772  | chr14    | 42273570  | C/G     | I   | $2.0 \times 10^{-16}$  | 1.081 | [1.061,1.102] | [LRFN5]                     |
| 18q21.1  | rs12965607  | chr18    | 47391025  | G/T     | I   | $2.4 \times 10^{-16}$  | 0.918 | [0.899,0.937] | [MYO5B]                     |
| 11q25    | rs1793639   | chr11    | 131931531 | A/G     | I   | $9.7 \times 10^{-16}$  | 1.061 | [1.046,1.076] | [NTM]                       |
| 4q21.21  | rs13129838  | chr4     | 80508788  | C/T     | I   | $2.6 \times 10^{-15}$  | 1.068 | [1.051,1.086] | GK2---[]---ANTXR2           |
| 2q31.1   | rs17428076  | chr2     | 172851936 | C/G     | I   | $3.2 \times 10^{-15}$  | 0.935 | [0.919,0.951] | HAT1-[]--METAP1D            |
| 17p13.1  | rs11658305  | chr17    | 7429321   | A/C     | I   | $7.9 \times 10^{-15}$  | 1.062 | [1.046,1.078] | POLR2A--[]--TNFSF12-TNFSF13 |
| 9p22.2   | rs10511652  | chr9     | 18362865  | A/G     | I   | $2.3 \times 10^{-14}$  | 1.058 | [1.043,1.073] | SH3GL2---[]---ADAMTSL1      |
| 12p13.31 | rs5442      | chr12    | 6954864   | A/G     | I   | $2.3 \times 10^{-14}$  | 0.895 | [0.870,0.921] | [GNB3]                      |
| 10q21.1  | rs4948523   | chr10    | 60339098  | A/C     | I   | $2.8 \times 10^{-14}$  | 0.946 | [0.933,0.960] | [BICC1]                     |
| 14q32.12 | rs34016308  | chr14    | 92615741  | D/I     | I   | $4.1 \times 10^{-14}$  | 0.929 | [0.911,0.947] | [CPSF2]                     |
| 6q22.1   | rs1064583   | chr6     | 116446576 | A/G     | I   | $1.6 \times 10^{-13}$  | 1.056 | [1.041,1.072] | [NT5DC1,COL10A1]            |
| 10q11.22 | rs201140091 | chr10    | 49408240  | D/I     | I   | $3.7 \times 10^{-13}$  | 1.068 | [1.049,1.087] | [FRMPD2]                    |
| 21q22.3  | rs73157695  | chr21    | 47371947  | A/G     | I   | $5.1 \times 10^{-13}$  | 0.944 | [0.929,0.959] | PCBP3-[]--COL6A1            |
| 1p31.3   | rs479445    | chr1     | 61341632  | A/T     | I   | $5.7 \times 10^{-13}$  | 0.946 | [0.932,0.960] | C1orf87---[]---NFIA         |
| 2q24.1   | rs297589    | chr2     | 157358750 | A/T     | I   | $5.8 \times 10^{-13}$  | 1.061 | [1.044,1.078] | [GPD2]                      |
| 11p15.1  | rs1550870   | chr11    | 18751041  | C/T     | I   | $9.9 \times 10^{-13}$  | 0.950 | [0.936,0.963] | [PTPN5]                     |
| 6p22.1   | rs2799081   | chr6     | 28270584  | C/T     | I   | $1.2 \times 10^{-12}$  | 0.943 | [0.928,0.959] | PGBD1[]--ZSCAN31            |
| 3p24.2   | rs826220    | chr3     | 24268677  | C/T     | I   | $2.3 \times 10^{-12}$  | 0.949 | [0.936,0.963] | [THR3]                      |
| 17q11.2  | rs10512441  | chr17    | 31239645  | C/T     | I   | $3.8 \times 10^{-12}$  | 1.065 | [1.046,1.084] | MYO1D--[]--TMEM98           |
| 12p13.31 | rs7968679   | chr12    | 9313304   | A/G     | I   | $3.8 \times 10^{-12}$  | 1.057 | [1.040,1.073] | [PZP]                       |
| 2p21     | rs2342406   | chr2     | 45152748  | C/T     | I   | $7.8 \times 10^{-12}$  | 1.065 | [1.046,1.085] | CAMKMT---[]--SIX3           |
| 11q22.3  | rs71041628  | chr11    | 105665158 | D/I     | I   | $9.7 \times 10^{-12}$  | 1.055 | [1.039,1.072] | [GRIA4]                     |
| 11q23.3  | rs10892173  | chr11    | 117672561 | C/T     | I   | $1.4 \times 10^{-11}$  | 1.051 | [1.036,1.066] | DSCAML1-[]--FXYD6-FXYD2     |
| 6p12.3   | rs2207136   | chr6     | 50809720  | C/T     | I   | $1.5 \times 10^{-11}$  | 1.051 | [1.036,1.066] | [TFAP2B]                    |

## Quality Statistics for Index SNPs

| assay.name  | is.v2 | is.v3 | is.v4 | gt.rate | hw.p.value            | p.date                | freq.b | avg.rsqr | min.rsqr | p.batch               | dose.b | qc.mask |
|-------------|-------|-------|-------|---------|-----------------------|-----------------------|--------|----------|----------|-----------------------|--------|---------|
| rs12193446  | TRUE  | TRUE  | TRUE  | 1.0000  | 0.026                 | 0.64                  | 0.0954 | 0.9946   | 0.9882   | 0.76                  | 0.0947 | v2v3v4  |
| rs11606250  | FALSE | FALSE | FALSE |         |                       |                       |        | 0.9716   | 0.9313   | 0.088                 | 0.8297 | v2v3v4  |
| rs7744813   | FALSE | TRUE  | TRUE  | 0.9991  | 0.89                  | 0.40                  | 0.4079 | 0.9913   | 0.9309   | 0.27                  | 0.4071 | v2v3v4  |
| rs10500355  | FALSE | FALSE | FALSE |         |                       |                       |        | 0.9860   | 0.9681   | 0.095                 | 0.6333 | v2v3v4  |
| rs524952    | FALSE | FALSE | TRUE  | 1.0000  | 0.013                 | 0.25                  | 0.5239 | 0.9958   | 0.9643   | 0.060                 | 0.5262 | v2v3v4  |
| rs3138141   | FALSE | FALSE | FALSE |         |                       |                       |        | 0.9861   | 0.9721   | 7.8×10 <sup>-5</sup>  | 0.7712 | v3v4    |
| rs10089517  | FALSE | FALSE | TRUE  | 0.9936  | 0.059                 | 0.063                 | 0.6494 | 0.9874   | 0.9728   | 0.025                 | 0.6452 | v2v3v4  |
| rs1550094   | FALSE | TRUE  | TRUE  | 0.9652  | 6.8×10 <sup>-10</sup> | 1.9×10 <sup>-5</sup>  | 0.3067 | 0.9926   | 0.9326   | 0.22                  | 0.3052 | v2v3v4  |
| rs869422    | TRUE  | TRUE  | FALSE | 0.9999  | 0.41                  | 0.74                  | 0.2157 | 0.9961   | 0.9777   | 0.85                  | 0.2153 | v2v3v4  |
| rs2155413   | TRUE  | TRUE  | TRUE  | 0.9998  | 0.34                  | 0.064                 | 0.5361 | 0.9960   | 0.9939   | 0.30                  | 0.5319 | v2v3v4  |
| rs9585327   | FALSE | FALSE | FALSE |         |                       |                       |        | 0.9929   | 0.9864   | 0.22                  | 0.5556 | v2v3v4  |
| rs2908972   | FALSE | FALSE | TRUE  | 1.0000  | 0.26                  | 0.59                  | 0.6010 | 0.9815   | 0.9718   | 0.28                  | 0.5981 | v2v3v4  |
| rs5022942   | FALSE | FALSE | TRUE  | 1.0000  | 2.3×10 <sup>-5</sup>  | 0.41                  | 0.7771 | 0.9983   | 0.9930   | 1.2×10 <sup>-5</sup>  | 0.7721 | v2v3v4  |
| rs10824518  | FALSE | FALSE | FALSE |         |                       |                       |        | 0.9916   | 0.9903   | 0.59                  | 0.6461 | v2v3v4  |
| rs11145488  | FALSE | FALSE | FALSE |         |                       |                       |        | 0.9966   | 0.9930   | 0.24                  | 0.7902 | v2v3v4  |
| rs17400325  | FALSE | TRUE  | TRUE  | 0.9998  | 0.24                  | 0.067                 | 0.9583 | 0.9834   | 0.9249   | 1.7×10 <sup>-10</sup> | 0.9565 | v2v3v4  |
| rs61049169  | FALSE | FALSE | FALSE |         |                       |                       |        | 0.9902   | 0.9787   | 0.63                  | 0.5593 | v2v3v4  |
| rs1556867   | TRUE  | TRUE  | TRUE  | 0.9997  | 0.58                  | 0.48                  | 0.2330 | 0.9996   | 0.9989   | 0.43                  | 0.2328 | v2v3v4  |
| rs10887265  | FALSE | FALSE | FALSE |         |                       |                       |        | 0.9277   | 0.9238   | 0.78                  | 0.6763 | v2v3v4  |
| rs9866391   | FALSE | FALSE | FALSE |         |                       |                       |        | 0.9811   | 0.9383   | 0.020                 | 0.6175 | v2v3v4  |
| rs9747347   | FALSE | FALSE | FALSE |         |                       |                       |        | 0.8344   | 0.7649   | 0.070                 | 0.3738 | v2v3v4  |
| rs13380104  | FALSE | FALSE | FALSE |         |                       |                       |        | 0.9953   | 0.9835   | 0.063                 | 0.4036 | v2v3v4  |
| rs2808510   | FALSE | FALSE | FALSE |         |                       |                       |        | 0.9926   | 0.9871   | 0.73                  | 0.3822 | v2v3v4  |
| rs2181346   | FALSE | FALSE | FALSE |         |                       |                       |        | 0.7408   | 0.6697   | 0.39                  | 0.3119 | v2v3v4  |
| rs56299331  | FALSE | FALSE | FALSE |         |                       |                       |        | 0.9875   | 0.9785   | 0.27                  | 0.2025 | v2v3v4  |
| rs34217772  | FALSE | FALSE | FALSE |         |                       |                       |        | 0.9984   | 0.9953   | 0.014                 | 0.1745 | v2v3v4  |
| rs12965607  | FALSE | FALSE | FALSE |         |                       |                       |        | 0.9496   | 0.9022   | 0.19                  | 0.8539 | v2v3v4  |
| rs1793639   | FALSE | FALSE | FALSE |         |                       |                       |        | 0.9830   | 0.9621   | 0.27                  | 0.5773 | v2v3v4  |
| rs13129838  | FALSE | FALSE | FALSE |         |                       |                       |        | 0.9229   | 0.9074   | 0.088                 | 0.2826 | v2v3v4  |
| rs17428076  | FALSE | FALSE | TRUE  | 1.0000  | 0.84                  | 0.16                  | 0.2363 | 0.9942   | 0.9910   | 0.48                  | 0.2348 | v2v3v4  |
| rs11658305  | FALSE | FALSE | FALSE |         |                       |                       |        | 0.9165   | 0.8846   | 0.025                 | 0.6085 | v2v3v4  |
| rs10511652  | TRUE  | TRUE  | FALSE | 0.9713  | 5.8×10 <sup>-13</sup> | 9.8×10 <sup>-50</sup> | 0.5994 | 0.9971   | 0.9825   | 0.17                  | 0.5880 | v2v3v4  |
| rs5442      | TRUE  | TRUE  | TRUE  | 0.9991  | 0.56                  | 0.59                  | 0.9336 | 0.9952   | 0.9929   | 0.51                  | 0.9335 | v2v3v4  |
| rs4948523   | FALSE | FALSE | FALSE |         |                       |                       |        | 0.9943   | 0.9930   | 0.0071                | 0.5275 | v2v3v4  |
| rs34016308  | FALSE | FALSE | FALSE |         |                       |                       |        | 0.9841   | 0.9783   | 0.40                  | 0.1659 | v2v3v4  |
| rs1064583   | TRUE  | TRUE  | TRUE  | 0.9987  | 0.94                  | 0.76                  | 0.3889 | 1.0000   | 0.9998   | 0.95                  | 0.3882 | v2v3v4  |
| rs201140091 | FALSE | FALSE | FALSE |         |                       |                       |        | 0.8150   | 0.8005   | 0.033                 | 0.2682 | v2v3v4  |
| rs73157695  | FALSE | FALSE | FALSE |         |                       |                       |        | 0.9809   | 0.9711   | 0.23                  | 0.7020 | v2v3v4  |
| rs479445    | FALSE | FALSE | FALSE |         |                       |                       |        | 0.9975   | 0.9875   | 0.056                 | 0.6745 | v2v3v4  |
| rs297589    | FALSE | FALSE | FALSE |         |                       |                       |        | 0.8998   | 0.8746   | 0.15                  | 0.3093 | v2v3v4  |
| rs1550870   | TRUE  | TRUE  | TRUE  | 0.9983  | 0.022                 | 0.87                  | 0.4609 | 0.9989   | 0.9951   | 0.35                  | 0.4587 | v2v3v4  |
| rs2799081   | FALSE | FALSE | FALSE |         |                       |                       |        | 0.9982   | 0.9974   | 0.031                 | 0.7354 | v2v3v4  |
| rs826220    | FALSE | FALSE | FALSE |         |                       |                       |        | 0.9975   | 0.9950   | 0.17                  | 0.5968 | v2v3v4  |
| rs10512441  | FALSE | TRUE  | TRUE  | 0.9999  | 0.017                 | 0.46                  | 0.2012 | 0.9855   | 0.8263   | 0.075                 | 0.2023 | v2v3v4  |
| rs7968679   | FALSE | FALSE | FALSE |         |                       |                       |        | 0.9814   | 0.9709   | 0.0021                | 0.3038 | v2v3v4  |
| rs2342406   | FALSE | TRUE  | FALSE | 0.9995  | 0.91                  | 0.27                  | 0.8083 | 0.9851   | 0.9171   | 0.63                  | 0.8091 | v2v3v4  |
| rs71041628  | FALSE | FALSE | FALSE |         |                       |                       |        | 0.8855   | 0.8746   | 0.0013                | 0.3810 | v2v3v4  |
| rs10892173  | FALSE | FALSE | FALSE |         |                       |                       |        | 0.9946   | 0.9857   | 0.32                  | 0.4030 | v2v3v4  |
| rs2207136   | FALSE | FALSE | FALSE |         |                       |                       |        | 0.9824   | 0.9767   | 0.0054                | 0.5511 | v2v3v4  |
| rs7162310   | FALSE | FALSE | FALSE |         |                       |                       |        | 0.9990   | 0.9953   | 0.19                  | 0.2212 | v2v3v4  |

## SNP Statistics in the GWAS Sample

| assay.name | AA.0  | AB.0  | BB.0  | im.num.0 | dose.b.0 | AA.1  | AB.1  | BB.1  | im.num.1 | dose.b.1 |
|------------|-------|-------|-------|----------|----------|-------|-------|-------|----------|----------|
| rs12193446 | 68256 | 16488 | 1009  | 85757    | 0.1076   | 88839 | 16416 | 829   | 106086   | 0.0850   |
| rs11606250 |       |       |       | 85757    | 0.8425   |       |       |       | 106086   | 0.8201   |
| rs7744813  | 26276 | 39453 | 14100 | 85757    | 0.4231   | 36189 | 46636 | 15314 | 106086   | 0.3936   |
| rs10500355 |       |       |       | 85757    | 0.6508   |       |       |       | 106086   | 0.6217   |
| rs524952   | 2824  | 6710  | 3933  | 85757    | 0.5427   | 3760  | 7651  | 4036  | 106086   | 0.5136   |
| rs3138141  |       |       |       | 79302    | 0.7588   |       |       |       | 97352    | 0.7825   |
| rs10089517 | 1755  | 6231  | 5397  | 85757    | 0.6330   | 1757  | 6913  | 6679  | 106086   | 0.6555   |
| rs1550094  | 37631 | 32437 | 6499  | 85757    | 0.2939   | 43744 | 41278 | 9228  | 106086   | 0.3140   |
| rs869422   | 43456 | 25388 | 3444  | 85757    | 0.2226   | 57188 | 29475 | 3971  | 106086   | 0.2060   |
| rs2155413  | 17704 | 42366 | 25665 | 85757    | 0.5430   | 23526 | 52969 | 29567 | 106086   | 0.5251   |
| rs9585327  |       |       |       | 85757    | 0.5657   |       |       |       | 106086   | 0.5477   |
| rs2908972  | 2029  | 6355  | 5083  | 85757    | 0.6097   | 2608  | 7428  | 5411  | 106086   | 0.5920   |
| rs5022942  | 652   | 4533  | 8282  | 85757    | 0.7848   | 828   | 5347  | 9272  | 106086   | 0.7690   |
| rs10824518 |       |       |       | 85757    | 0.6519   |       |       |       | 106086   | 0.6356   |
| rs11145488 |       |       |       | 85757    | 0.7963   |       |       |       | 106086   | 0.7831   |
| rs17400325 | 118   | 5802  | 73751 | 85757    | 0.9613   | 204   | 8276  | 89450 | 106086   | 0.9545   |
| rs61049169 |       |       |       | 85757    | 0.5470   |       |       |       | 106086   | 0.5643   |
| rs1556867  | 51303 | 30044 | 4390  | 85757    | 0.2263   | 61329 | 38716 | 6011  | 106086   | 0.2391   |
| rs10887265 |       |       |       | 85757    | 0.6849   |       |       |       | 106086   | 0.6703   |
| rs9866391  |       |       |       | 85757    | 0.6065   |       |       |       | 106086   | 0.6220   |
| rs9747347  |       |       |       | 85757    | 0.3684   |       |       |       | 106086   | 0.3820   |
| rs13380104 |       |       |       | 85757    | 0.3983   |       |       |       | 106086   | 0.4130   |
| rs2808510  |       |       |       | 85757    | 0.3770   |       |       |       | 106086   | 0.3912   |
| rs2181346  |       |       |       | 85757    | 0.3044   |       |       |       | 106086   | 0.3171   |
| rs56299331 |       |       |       | 85757    | 0.1946   |       |       |       | 106086   | 0.2061   |
| rs34217772 |       |       |       | 85757    | 0.1718   |       |       |       | 106086   | 0.1825   |
| rs12965607 |       |       |       | 85757    | 0.8591   |       |       |       | 106086   | 0.8491   |
| rs1793639  |       |       |       | 85757    | 0.5703   |       |       |       | 106086   | 0.5849   |
| rs13129838 |       |       |       | 85757    | 0.2758   |       |       |       | 106086   | 0.2878   |
| rs17428076 | 7809  | 4888  | 770   | 85757    | 0.2409   | 9148  | 5504  | 795   | 106086   | 0.2289   |
| rs11658305 |       |       |       | 85757    | 0.6020   |       |       |       | 106086   | 0.6151   |

|             |       |       |       |       |        |       |       |       |        |        |
|-------------|-------|-------|-------|-------|--------|-------|-------|-------|--------|--------|
| rs10511652  | 11281 | 34437 | 24438 | 85757 | 0.5820 | 13365 | 42754 | 32020 | 106086 | 0.5951 |
| rs5442      | 365   | 10123 | 75187 | 85757 | 0.9363 | 502   | 13843 | 91640 | 106086 | 0.9295 |
| rs4948523   |       |       |       | 85757 | 0.5364 |       |       |       | 106086 | 0.5221 |
| rs34016308  |       |       |       | 85757 | 0.1702 |       |       |       | 106086 | 0.1607 |
| rs1064583   | 32689 | 40395 | 12565 | 85757 | 0.3827 | 38774 | 50622 | 16569 | 106086 | 0.3953 |
| rs201140091 |       |       |       | 85757 | 0.2638 |       |       |       | 106086 | 0.2738 |
| rs73157695  |       |       |       | 85757 | 0.7082 |       |       |       | 106086 | 0.6970 |
| rs479445    |       |       |       | 85757 | 0.6833 |       |       |       | 106086 | 0.6709 |
| rs297589    |       |       |       | 85757 | 0.3034 |       |       |       | 106086 | 0.3145 |
| rs1550870   | 24181 | 42482 | 18935 | 85757 | 0.4694 | 31415 | 52323 | 22166 | 106086 | 0.4563 |
| rs2799081   |       |       |       | 85757 | 0.7429 |       |       |       | 106086 | 0.7316 |
| rs826220    |       |       |       | 85757 | 0.6051 |       |       |       | 106086 | 0.5920 |
| rs10512441  | 51846 | 24707 | 3124  | 85757 | 0.1945 | 61877 | 31944 | 4108  | 106086 | 0.2051 |
| rs7968679   |       |       |       | 85757 | 0.2995 |       |       |       | 106086 | 0.3102 |
| rs2342406   | 2633  | 20862 | 42691 | 85757 | 0.8037 | 2869  | 25185 | 54405 | 106086 | 0.8135 |
| rs71041628  |       |       |       | 85757 | 0.3757 |       |       |       | 106086 | 0.3867 |
| rs10892173  |       |       |       | 85757 | 0.3990 |       |       |       | 106086 | 0.4103 |
| rs2207136   |       |       |       | 85757 | 0.5407 |       |       |       | 106086 | 0.5534 |
| rs7162310   |       |       |       | 85757 | 0.2240 |       |       |       | 106086 | 0.2143 |

## Annotations from NHGRI GWAS Catalog

The following table shows, for each index SNP, all entries in the NHGRI GWAS Catalog that are within 500kb and in at least moderate linkage disequilibrium ( $r^2 > 0.5$ ).

| region  | position  | our.name   | our.pval               | dist   | rsqr  | assay.name | pvalue                | pubmed.id | trait                                                     | genes              |
|---------|-----------|------------|------------------------|--------|-------|------------|-----------------------|-----------|-----------------------------------------------------------|--------------------|
| 6q22.33 | 129820038 | rs12193446 | $5.4 \times 10^{-102}$ | 0      | 1.000 | rs12193446 | $1.0 \times 10^{-8}$  | 24144296  | Axial length                                              | LAMA2, ARHGAP18    |
| 6q22.33 | 129820038 | rs12193446 | $5.4 \times 10^{-102}$ | 14591  | 0.551 | rs12205363 | $2.0 \times 10^{-12}$ | 23396134  | Refractive error                                          | LAMA2              |
| 6q13    | 73643289  | rs7744813  | $1.9 \times 10^{-63}$  | 0      | 1.000 | rs7744813  | $4.0 \times 10^{-9}$  | 23396134  | Refractive error                                          | KCNQ5              |
| 16p13.3 | 7459347   | rs10500355 | $2.0 \times 10^{-63}$  | 0      | 1.000 | rs10500355 | $4.0 \times 10^{-9}$  | 23474815  | Refractive error                                          | RBFOX1             |
| 16p13.3 | 7459347   | rs10500355 | $2.0 \times 10^{-63}$  | 336    | 1.000 | rs17648524 | $6.0 \times 10^{-10}$ | 23396134  | Refractive error                                          | RBFOX1             |
| 15q14   | 35005886  | rs524952   | $3.5 \times 10^{-62}$  | -16260 | 0.591 | rs11073058 | $4.0 \times 10^{-11}$ | 24144296  | Axial length                                              | GJD2, ACTC1        |
| 15q14   | 35005886  | rs524952   | $3.5 \times 10^{-62}$  | 0      | 1.000 | rs524952   | $1.0 \times 10^{-15}$ | 23396134  | Refractive error                                          | GJD2               |
| 15q14   | 35005886  | rs524952   | $3.5 \times 10^{-62}$  | 187    | 1.000 | rs634990   | $2.0 \times 10^{-14}$ | 20835239  | Refractive error                                          | GJD2,ACTC1,GOLGA8B |
| 8q12.1  | 60178721  | rs10089517 | $6.0 \times 10^{-41}$  | 0      | 1.000 | rs10089517 | $2.0 \times 10^{-6}$  | 22589738  | Visceral adipose tissue/subcutaneous adipose tissue ratio | TOX                |
| 8q12.1  | 60178721  | rs10089517 | $6.0 \times 10^{-41}$  | 365    | 0.576 | rs7837791  | $4.0 \times 10^{-12}$ | 23396134  | Refractive error                                          | CHD7, TOX          |
| 8p11.21 | 40723970  | rs869422   | $4.0 \times 10^{-31}$  | 2424   | 1.000 | rs7829127  | $4.0 \times 10^{-10}$ | 23396134  | Refractive error                                          | ZMAT4              |
| 17p12   | 11407259  | rs2908972  | $5.3 \times 10^{-24}$  | 642    | 0.621 | rs2969180  | $7.0 \times 10^{-11}$ | 23396134  | Refractive error                                          | SHISA6             |
| 9q21.11 | 71770939  | rs11145488 | $6.7 \times 10^{-21}$  | -4346  | 1.000 | rs11145465 | $7.0 \times 10^{-9}$  | 23396134  | Refractive error                                          | TJP2               |
| 3q23    | 141076084 | rs9866391  | $7.7 \times 10^{-19}$  | 2104   | 0.685 | rs9857275  | $2.0 \times 10^{-6}$  | 22210626  | Prion diseases                                            | ZBTB38, RASA2      |
| 3q23    | 141076084 | rs9866391  | $7.7 \times 10^{-19}$  | 18125  | 0.547 | rs6440003  | $2.0 \times 10^{-10}$ | 21998595  | Height                                                    | ZBTB38             |
| 3q23    | 141076084 | rs9866391  | $7.7 \times 10^{-19}$  | 18125  | 0.547 | rs6440003  | $2.0 \times 10^{-24}$ | 18391952  | Height                                                    | ZBTB38             |
| 3q23    | 141076084 | rs9866391  | $7.7 \times 10^{-19}$  | 26749  | 0.542 | rs6763931  | $2.0 \times 10^{-8}$  | 21743467  | Prostate cancer                                           | ZBTB38             |
| 3q23    | 141076084 | rs9866391  | $7.7 \times 10^{-19}$  | 26749  | 0.542 | rs6763931  | $3.0 \times 10^{-12}$ | 19343178  | Height                                                    | ZBTB38             |
| 3q23    | 141076084 | rs9866391  | $7.7 \times 10^{-19}$  | 26749  | 0.542 | rs6763931  | $1.0 \times 10^{-27}$ | 18391951  | Height                                                    | ZBTB38             |
| 3q23    | 141076084 | rs9866391  | $7.7 \times 10^{-19}$  | 29486  | 0.542 | rs724016   | $3.0 \times 10^{-86}$ | 20881960  | Height                                                    | ZBTB38             |
| 3q23    | 141076084 | rs9866391  | $7.7 \times 10^{-19}$  | 29486  | 0.542 | rs724016   | $8.0 \times 10^{-22}$ | 18391950  | Height                                                    | ZBTB38             |
| 3q23    | 141076084 | rs9866391  | $7.7 \times 10^{-19}$  | 29486  | 0.542 | rs724016   | $1.0 \times 10^{-6}$  | 18193045  | Height                                                    | ZBTB38             |
| 3q23    | 141076084 | rs9866391  | $7.7 \times 10^{-19}$  | 57366  | 0.509 | rs1991431  | $4.0 \times 10^{-47}$ | 23563607  | Height                                                    | ZBTB38             |
| 15q25.1 | 79378821  | rs13380104 | $4.3 \times 10^{-18}$  | -5946  | 0.899 | rs4778879  | $4.0 \times 10^{-11}$ | 23396134  | Refractive error                                          | RASGRF1            |
| 15q25.1 | 79378821  | rs13380104 | $4.3 \times 10^{-18}$  | 85026  | 0.660 | rs1474256  | $6.0 \times 10^{-6}$  | 23897914  | Bronchopulmonary dysplasia                                | RASGRF1, LOC729911 |
| 10q25.2 | 114788436 | rs56299331 | $1.1 \times 10^{-16}$  | -34348 | 0.543 | rs7901695  | $1.0 \times 10^{-6}$  | 21347282  | Coronary heart disease                                    | TCF7L2             |
| 10q25.2 | 114788436 | rs56299331 | $1.1 \times 10^{-16}$  | -34348 | 0.543 | rs7901695  | $1.0 \times 10^{-48}$ | 17463249  | Type 2 diabetes                                           | TCF7L2             |
| 10q25.2 | 114788436 | rs56299331 | $1.1 \times 10^{-16}$  | -32395 | 0.545 | rs4506565  | $1.0 \times 10^{-8}$  | 20081858  | Fasting glucose-related traits                            | TCF7L2             |
| 10q25.2 | 114788436 | rs56299331 | $1.1 \times 10^{-16}$  | -32395 | 0.545 | rs4506565  | $5.0 \times 10^{-12}$ | 17554300  | Type 2 diabetes                                           | TCF7L2             |
| 10q25.2 | 114788436 | rs56299331 | $1.1 \times 10^{-16}$  | -30087 | 0.593 | rs7903146  | $2.0 \times 10^{-15}$ | 23945395  | Type 2 diabetes                                           | TCF7L2             |
| 10q25.2 | 114788436 | rs56299331 | $1.1 \times 10^{-16}$  | -30087 | 0.593 | rs7903146  | $9.0 \times 10^{-75}$ | 23300278  | Type 2 diabetes                                           | TCF7L2             |
| 10q25.2 | 114788436 | rs56299331 | $1.1 \times 10^{-16}$  | -30087 | 0.593 | rs7903146  | $1.0 \times 10^{-35}$ | 23209189  | Type 2 diabetes                                           | TCF7L2             |
| 10q25.2 | 114788436 | rs56299331 | $1.1 \times 10^{-16}$  | -30087 | 0.593 | rs7903146  | $4.0 \times 10^{-21}$ | 22693455  | Type 2 diabetes                                           | TCF7L2             |
| 10q25.2 | 114788436 | rs56299331 | $1.1 \times 10^{-16}$  | -30087 | 0.593 | rs7903146  | $3.0 \times 10^{-6}$  | 22581228  | Fasting insulin-related traits (interaction with BMI)     | TCF7L2             |
| 10q25.2 | 114788436 | rs56299331 | $1.1 \times 10^{-16}$  | -30087 | 0.593 | rs7903146  | $2.0 \times 10^{-14}$ | 22581228  | Fasting glucose-related traits (interaction with BMI)     | TCF7L2             |
| 10q25.2 | 114788436 | rs56299331 | $1.1 \times 10^{-16}$  | -30087 | 0.593 | rs7903146  | $2.0 \times 10^{-15}$ | 22101970  | Type 2 diabetes                                           | TCF7L2             |
| 10q25.2 | 114788436 | rs56299331 | $1.1 \times 10^{-16}$  | -30087 | 0.593 | rs7903146  | $2.0 \times 10^{-20}$ | 21873549  | Proinsulin levels                                         | TCF7L2             |
| 10q25.2 | 114788436 | rs56299331 | $1.1 \times 10^{-16}$  | -30087 | 0.593 | rs7903146  | $1.0 \times 10^{-7}$  | 20849430  | Glycated hemoglobin levels                                | TCF7L2             |
| 10q25.2 | 114788436 | rs56299331 | $1.1 \times 10^{-16}$  | -30087 | 0.593 | rs7903146  | $7.0 \times 10^{-7}$  | 20694148  | Metabolic syndrome                                        | TCF7L2             |
| 10q25.2 | 114788436 | rs56299331 | $1.1 \times 10^{-16}$  | -30087 | 0.593 | rs7903146  | $2.0 \times 10^{-51}$ | 20581827  | Type 2 diabetes                                           | TCF7L2             |
| 10q25.2 | 114788436 | rs56299331 | $1.1 \times 10^{-16}$  | -30087 | 0.593 | rs7903146  | $1.0 \times 10^{-30}$ | 19734900  | Type 2 diabetes and other traits                          | TCF7L2             |
| 10q25.2 | 114788436 | rs56299331 | $1.1 \times 10^{-16}$  | -30087 | 0.593 | rs7903146  | $8.0 \times 10^{-12}$ | 19401414  | Type 2 diabetes                                           | TCF7L2             |
| 10q25.2 | 114788436 | rs56299331 | $1.1 \times 10^{-16}$  | -30087 | 0.593 | rs7903146  | $9.0 \times 10^{-30}$ | 19056611  | Type 2 diabetes                                           | TCF7L2             |
| 10q25.2 | 114788436 | rs56299331 | $1.1 \times 10^{-16}$  | -30087 | 0.593 | rs7903146  | $3.0 \times 10^{-23}$ | 18372903  | Type 2 diabetes                                           | TCF7L2             |
| 10q25.2 | 114788436 | rs56299331 | $1.1 \times 10^{-16}$  | -30087 | 0.593 | rs7903146  | $5.0 \times 10^{-8}$  | 17668382  | Type 2 diabetes                                           | TCF7L2             |
| 10q25.2 | 114788436 | rs56299331 | $1.1 \times 10^{-16}$  | -30087 | 0.593 | rs7903146  | $1.0 \times 10^{-8}$  | 17463248  | Type 2 diabetes                                           | TCF7L2             |
| 10q25.2 | 114788436 | rs56299331 | $1.1 \times 10^{-16}$  | -30087 | 0.593 | rs7903146  | $2.0 \times 10^{-31}$ | 17463246  | Type 2 diabetes                                           | TCF7L2             |
| 10q25.2 | 114788436 | rs56299331 | $1.1 \times 10^{-16}$  | -30087 | 0.593 | rs7903146  | $2.0 \times 10^{-10}$ | 17460697  | Type 2 diabetes                                           | TCF7L2             |
| 10q25.2 | 114788436 | rs56299331 | $1.1 \times 10^{-16}$  | -30087 | 0.593 | rs7903146  | $2.0 \times 10^{-34}$ | 17293876  | Type 2 diabetes                                           | TCF7L2             |
| 10q25.2 | 114788436 | rs56299331 | $1.1 \times 10^{-16}$  | 379    | 0.687 | rs12243326 | $1.0 \times 10^{-7}$  | 20081857  | Two-hour glucose challenge                                | TCF7L2             |
| 4q21.21 | 80508788  | rs13129838 | $2.6 \times 10^{-15}$  | 21883  | 0.618 | rs9307551  | $1.0 \times 10^{-8}$  | 23396134  | Refractive error                                          | LOC100506035       |
| 17p13.1 | 7429321   | rs11658305 | $7.9 \times 10^{-15}$  | -11658 | 0.860 | rs6761     | $3.0 \times 10^{-7}$  | 18464913  | Protein quantitative trait loci                           | SHBG               |

|         |           |            |                       |         |       |            |                       |          |                                  |                 |
|---------|-----------|------------|-----------------------|---------|-------|------------|-----------------------|----------|----------------------------------|-----------------|
| 10q21.1 | 60339098  | rs4948523  | $2.8 \times 10^{-14}$ | -73694  | 0.927 | rs7084402  | $2.0 \times 10^{-13}$ | 23396134 | Refractive error                 | BICC1           |
| 10q21.1 | 60339098  | rs4948523  | $2.8 \times 10^{-14}$ | -20201  | 0.948 | rs1658442  | $3.0 \times 10^{-6}$  | 23322567 | Corneal astigmatism              |                 |
| 6q22.1  | 116446576 | rs1064583  | $1.6 \times 10^{-13}$ | -2841   | 0.989 | rs3812111  | $2.0 \times 10^{-8}$  | 23455636 | Age-related macular degeneration | COL10A1         |
| 6p22.1  | 28270584  | rs2799081  | $1.2 \times 10^{-12}$ | 51712   | 0.791 | rs6903823  | $2.0 \times 10^{-10}$ | 21946350 | Pulmonary function               | ZKSCAN3, ZNF323 |
| 17q11.2 | 31239645  | rs10512441 | $3.8 \times 10^{-12}$ | -161373 | 0.924 | rs17183295 | $1.0 \times 10^{-10}$ | 23396134 | Refractive error                 | MYO1D           |

## Replication of GWAS Catalog Results

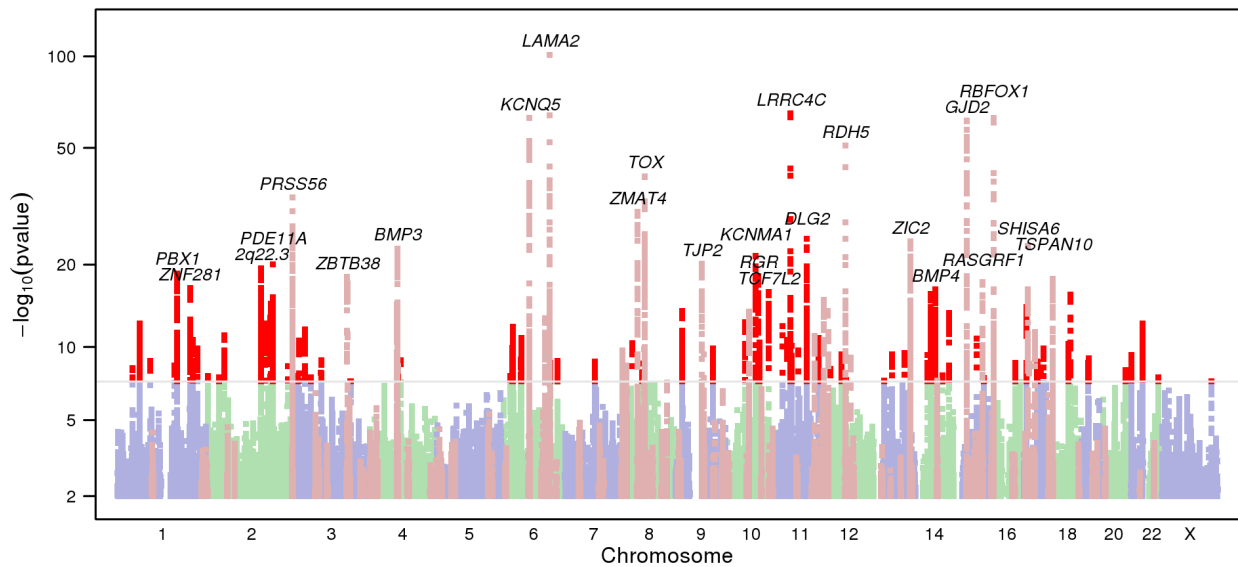

The following table shows, for each GWAS Catalog result for similar traits, our association test result for our best available proxy (distance < 100kb,  $r^2 > 0.8$ ).

| region  | position  | our.name   | our.pval             | dist | rsqr  | assay.name | pvalue                | pubmed.id | trait                 | genes                                   |
|---------|-----------|------------|----------------------|------|-------|------------|-----------------------|-----------|-----------------------|-----------------------------------------|
| 1p21.3  | 99524047  | rs10747502 | 0.37                 | 0    | 1.000 | rs10747502 | $1.0 \times 10^{-9}$  | 23049088  | Myopia (pathological) | LOC100129620                            |
| 1q42.2  | 230922951 | rs12038826 | 0.75                 | 0    | 1.000 | rs12038826 | $7.0 \times 10^{-6}$  | 23049088  | Myopia (pathological) | CAPN9                                   |
| 1q44    | 249168436 | rs12032643 | 0.35                 | 0    | 1.000 | rs12032643 | $1.0 \times 10^{-9}$  | 23049088  | Myopia (pathological) | Intergenic                              |
| 2p16.2  | 54718181  | rs4557020  | 0.070                | 0    | 1.000 | rs4557020  | $3.0 \times 10^{-7}$  | 22685421  | Myopia (pathological) | SPTBN1                                  |
| 2p13.1  | 74939176  | rs1137     | 0.029                | 0    | 1.000 | rs1137     | $4.0 \times 10^{-6}$  | 22685421  | Myopia (pathological) | SEMA4F                                  |
| 3p14.2  | 59928851  | rs931317   | 0.96                 | 0    | 1.000 | rs931317   | $3.0 \times 10^{-6}$  | 23049088  | Myopia (pathological) | FHIT                                    |
| 3p12.1  | 86255672  | rs7428796  | 0.018                | 0    | 1.000 | rs7428796  | $2.0 \times 10^{-18}$ | 23049088  | Myopia (pathological) | Intergenic                              |
| 3q23    | 140247177 | rs4683505  | 0.60                 | 0    | 1.000 | rs4683505  | $4.0 \times 10^{-7}$  | 23049088  | Myopia (pathological) | CLSTN2                                  |
| 3q24    | 143902027 | rs4839680  | 0.68                 | 0    | 1.000 | rs4839680  | $1.0 \times 10^{-15}$ | 23049088  | Myopia (pathological) | Intergenic                              |
| 3q26.32 | 177766464 | rs7634528  | 0.65                 | 0    | 1.000 | rs7634528  | $1.0 \times 10^{-6}$  | 23049088  | Myopia (pathological) | Intergenic                              |
| 3q27.3  | 186466252 | rs1656966  | 0.99                 | 0    | 1.000 | rs1656966  | $4.0 \times 10^{-21}$ | 23049088  | Myopia (pathological) | Intergenic                              |
| 3q27.3  | 187687890 | rs16862782 | 0.64                 | 0    | 1.000 | rs16862782 | $5.0 \times 10^{-7}$  | 23049088  | Myopia (pathological) | Intergenic                              |
| 4p16.1  | 10726853  | rs16872571 | 0.92                 | 0    | 1.000 | rs16872571 | $2.0 \times 10^{-10}$ | 23049088  | Myopia (pathological) | Intergenic                              |
| 4p15.2  | 24578097  | rs6841898  | 0.19                 | 0    | 1.000 | rs6841898  | $3.0 \times 10^{-26}$ | 23049088  | Myopia (pathological) | DHX15                                   |
| 4q25    | 112611750 | rs10034228 | 0.24                 | 0    | 1.000 | rs10034228 | $8.0 \times 10^{-13}$ | 21505071  | Myopia (pathological) | MYP11                                   |
| 4q25    | 112702635 | rs1585471  | 0.22                 | 0    | 1.000 | rs1585471  | $2.0 \times 10^{-6}$  | 21505071  | Myopia (pathological) | MYP11                                   |
| 4q33    | 170880883 | rs11723530 | 0.40                 | 0    | 1.000 | rs11723530 | $4.0 \times 10^{-6}$  | 23049088  | Myopia (pathological) | Intergenic                              |
| 4q35.2  | 189120911 | rs6857559  | 0.48                 | 0    | 1.000 | rs6857559  | $3.0 \times 10^{-21}$ | 23049088  | Myopia (pathological) | Intergenic                              |
| 5p15.31 | 7368845   | rs13172324 | 0.87                 | 0    | 1.000 | rs13172324 | $3.0 \times 10^{-10}$ | 23049088  | Myopia (pathological) | Intergenic                              |
| 5p15.2  | 11169945  | rs6885224  | 0.41                 | 0    | 1.000 | rs6885224  | $8.0 \times 10^{-6}$  | 21095009  | Myopia (pathological) | CTNND2                                  |
| 5p13.1  | 39979172  | rs10053502 | 0.096                | 0    | 1.000 | rs10053502 | $1.0 \times 10^{-16}$ | 23049088  | Myopia (pathological) | Intergenic                              |
| 5q11.1  | 50026465  | rs282544   | 0.0083               | 0    | 1.000 | rs282544   | $4.0 \times 10^{-6}$  | 22685421  | Myopia (pathological) | PARP8                                   |
| 5q31.3  | 141189168 | rs248471   | 0.62                 | 0    | 1.000 | rs248471   | $2.0 \times 10^{-6}$  | 23406873  | Myopia (pathological) | PCDH1                                   |
| 5q33.1  | 150473674 | rs999556   | 0.32                 | 0    | 1.000 | rs999556   | $1.0 \times 10^{-15}$ | 23049088  | Myopia (pathological) | Intergenic                              |
| 6p24.3  | 7743663   | rs9505270  | 0.69                 | 0    | 1.000 | rs9505270  | $4.0 \times 10^{-7}$  | 23049088  | Myopia (pathological) | BMP6                                    |
| 6q21    | 108017671 | rs12525668 | 0.52                 | 0    | 1.000 | rs12525668 | $8.0 \times 10^{-11}$ | 23049088  | Myopia (pathological) | Intergenic                              |
| 6q22.1  | 117605991 | rs13201929 | 0.23                 | 0    | 1.000 | rs13201929 | $3.0 \times 10^{-6}$  | 23049088  | Myopia (pathological) | Intergenic                              |
| 6q24.3  | 147971574 | rs1302019  | 0.78                 | 0    | 1.000 | rs1302019  | $2.0 \times 10^{-23}$ | 23049088  | Myopia (pathological) | Intergenic                              |
| 7p14.1  | 38004406  | rs1668357  | 0.46                 | 0    | 1.000 | rs1668357  | $4.0 \times 10^{-8}$  | 23049088  | Myopia (pathological) | Intergenic                              |
| 7q21.3  | 97422926  | rs1229542  | 0.39                 | 0    | 1.000 | rs1229542  | $2.0 \times 10^{-6}$  | 23049088  | Myopia (pathological) | Intergenic                              |
| 7q22.3  | 104758250 | rs6968355  | 0.047                | 0    | 1.000 | rs6968355  | $2.0 \times 10^{-7}$  | 23049088  | Myopia (pathological) | SRPK2                                   |
| 7q36.3  | 157387441 | rs10274279 | 0.53                 | 0    | 1.000 | rs10274279 | $4.0 \times 10^{-11}$ | 23049088  | Myopia (pathological) | PTPRN2                                  |
| 7q36.3  | 158846929 | rs2730260  | 0.0030               | 0    | 1.000 | rs2730260  | $9.0 \times 10^{-14}$ | 23406873  | Myopia (pathological) | VIPR2                                   |
| 8p23.1  | 8890098   | rs1045529  | $6.8 \times 10^{-6}$ | 0    | 1.000 | rs1045529  | $3.0 \times 10^{-6}$  | 23049088  | Myopia (pathological) | Intergenic                              |
| 8p23.1  | 8990577   | rs189798   | 0.089                | 0    | 1.000 | rs189798   | $6.0 \times 10^{-7}$  | 23049088  | Myopia (pathological) | PPP1R3B, MYP10, MIR4660, MIR124-1, MSRA |
| 8p23.1  | 9814411   | rs656319   | 0.0043               | 0    | 1.000 | rs656319   | $3.0 \times 10^{-6}$  | 23049088  | Myopia (pathological) | Intergenic                              |
| 8p23.1  | 11612698  | rs804280   | 0.045                | 0    | 1.000 | rs804280   | $4.0 \times 10^{-6}$  | 23049088  | Myopia (pathological) | GATA4                                   |
| 8q12.1  | 56599548  | rs4737395  | 0.80                 | 0    | 1.000 | rs4737395  | $5.0 \times 10^{-9}$  | 23049088  | Myopia (pathological) | Intergenic                              |
| 8q12.1  | 60961821  | rs569688   | 0.083                | 0    | 1.000 | rs569688   | $4.0 \times 10^{-7}$  | 23049088  | Myopia (pathological) | Intergenic                              |
| 8q13.1  | 66822030  | rs6472235  | 0.017                | 0    | 1.000 | rs6472235  | $1.0 \times 10^{-7}$  | 23049088  | Myopia (pathological) | Intergenic                              |
| 8q21.13 | 82151747  | rs12216812 | 0.76                 | 0    | 1.000 | rs12216812 | $3.0 \times 10^{-9}$  | 23049088  | Myopia (pathological) | Intergenic                              |



|          |          |           |                       |        |       |            |         |        |
|----------|----------|-----------|-----------------------|--------|-------|------------|---------|--------|
| 6p22.1   | 28270584 | rs2799081 | $1.2 \times 10^{-12}$ | 23966  | 0.521 | rs853684   | ZSCAN31 | K205R  |
| 6p22.1   | 28270584 | rs2799081 | $1.2 \times 10^{-12}$ | 87736  | 0.604 | rs1361385  | ZSCAN12 | C583R  |
| 6p22.1   | 28270584 | rs2799081 | $1.2 \times 10^{-12}$ | 87751  | 0.604 | rs1416918  | ZSCAN12 | R578G  |
| 12p13.31 | 9313304  | rs7968679 | $3.8 \times 10^{-12}$ | -81036 | 0.692 | rs669      | A2M     | I1000V |
| 12p13.31 | 9313304  | rs7968679 | $3.8 \times 10^{-12}$ | -10008 | 0.981 | rs10842971 | PZP     | I1443N |

## Nearby Expression QTLs

| region   | position  | our.name   | our.pval              | dist    | rsqr  | assay.name | eqtl.dist | eqtl.gene  | eqtl.pval             | eqtl.rsqr | tissue         | pubmed.id |
|----------|-----------|------------|-----------------------|---------|-------|------------|-----------|------------|-----------------------|-----------|----------------|-----------|
| 12q13.2  | 56115778  | rs3138141  | $1.5 \times 10^{-51}$ | -193    | 0.975 | rs3138142  | 728519    | MIP        | $7.2 \times 10^{-5}$  | 0.055     | B-Cell         | 22446964  |
| 12q13.2  | 56115778  | rs3138141  | $1.5 \times 10^{-51}$ | -193    | 0.975 | rs3138142  | 2823      | RDH5       | $2.7 \times 10^{-42}$ | 0.485     | Monocyte       | 22446964  |
| 12q13.2  | 56115778  | rs3138141  | $1.5 \times 10^{-51}$ | -193    | 0.975 | rs3138142  | 2823      | RDH5       | $5.2 \times 10^{-26}$ | 0.329     | B-Cell         | 22446964  |
| 2q37.1   | 233385396 | rs1550094  | $9.2 \times 10^{-35}$ | -9612   | 0.705 | rs2117770  | 359210    | ILMN_18124 | 0.00034               | 0.162     | Lymphoblastoid | 19644074  |
| 13q32.3  | 100689354 | rs9585327  | $8.9 \times 10^{-25}$ | 2013    | 0.652 | rs8000973  | 49970     | PCCA       | $2.0 \times 10^{-8}$  | 0.024     | Monocyte       | 20502693  |
| 3q23     | 141076084 | rs9866391  | $7.7 \times 10^{-19}$ | 17201   | 0.612 | rs7624084  | 368312    | RNF7       | 0.0011                | 0.038     | B-Cell         | 22446964  |
| 17p13.1  | 7429321   | rs11658305 | $7.9 \times 10^{-15}$ | -66233  | 0.624 | rs9217     | -2403     | CHRNA1     | $2.4 \times 10^{-22}$ | 0.287     | Monocyte       | 22446964  |
| 17p13.1  | 7429321   | rs11658305 | $7.9 \times 10^{-15}$ | -23187  | 0.662 | rs11658168 | 45202     | CHRNA1     | $3.1 \times 10^{-66}$ | 0.184     | Monocyte       | 20502693  |
| 10q21.1  | 60339098  | rs4948523  | $2.8 \times 10^{-14}$ | -67274  | 0.588 | rs7069916  | 318910    | HS.100261  | $4.4 \times 10^{-5}$  | 0.058     | Monocyte       | 22446964  |
| 6q22.1   | 116446576 | rs1064583  | $1.6 \times 10^{-13}$ | -23277  | 0.611 | rs509002   | 143014    | NT5DC1     | 0.0011                | 0.037     | Monocyte       | 22446964  |
| 6q22.1   | 116446576 | rs1064583  | $1.6 \times 10^{-13}$ | -7356   | 0.577 | rs515745   | 17221     | NT5DC1     | $7.4 \times 10^{-15}$ | 0.151     | Lymphoblastoid | 24037378  |
| 6q22.1   | 116446576 | rs1064583  | $1.6 \times 10^{-13}$ | 100348  | 0.540 | rs1204804  | 235609    | FAM26F     | $1.3 \times 10^{-7}$  | 0.021     | Monocyte       | 20502693  |
| 6p22.1   | 28270584  | rs2799081  | $1.2 \times 10^{-12}$ | -83483  | 0.510 | rs1736891  | 213941    | ZSCAN23    | 0.00085               | 0.039     | B-Cell         | 22446964  |
| 6p22.1   | 28270584  | rs2799081  | $1.2 \times 10^{-12}$ | 29752   | 0.623 | rs17312661 | -460639   | HIST1H3I   | 0.00018               | 0.049     | B-Cell         | 22446964  |
| 6p22.1   | 28270584  | rs2799081  | $1.2 \times 10^{-12}$ | 54724   | 0.723 | rs6922111  | 0         | ZKSCAN3    | $2.1 \times 10^{-8}$  | 0.024     | Monocyte       | 20502693  |
| 6p22.1   | 28270584  | rs2799081  | $1.2 \times 10^{-12}$ | 119646  | 0.590 | rs16894095 | 590925    | HIST1H4K   | $5.8 \times 10^{-6}$  | 0.016     | Monocyte       | 20502693  |
| 6p22.1   | 28270584  | rs2799081  | $1.2 \times 10^{-12}$ | 256071  | 0.558 | rs414745   | -429050   | ZSCAN16    | 0.00030               | 0.046     | Monocyte       | 22446964  |
| 6p22.1   | 28270584  | rs2799081  | $1.2 \times 10^{-12}$ | 263362  | 0.558 | rs418092   | -728240   | HIST1H2AK  | 0.00090               | 0.039     | B-Cell         | 22446964  |
| 6p22.1   | 28270584  | rs2799081  | $1.2 \times 10^{-12}$ | 272680  | 0.643 | rs17336532 | -273277   | PGBD1      | $4.4 \times 10^{-5}$  | 0.058     | B-Cell         | 22446964  |
| 6p22.1   | 28270584  | rs2799081  | $1.2 \times 10^{-12}$ | 276368  | 0.722 | rs16901848 | -2261548  | HIST1H4H   | 0.00031               | 0.045     | Monocyte       | 22446964  |
| 17q11.2  | 31239645  | rs10512441 | $3.8 \times 10^{-12}$ | -203152 | 0.915 | rs9912761  | 216865    | MYO1D      | $1.5 \times 10^{-6}$  | 0.274     | T-cell         | 19644074  |
| 17q11.2  | 31239645  | rs10512441 | $3.8 \times 10^{-12}$ | -52429  | 0.932 | rs17781142 | 0         | MYO1D      | $4.2 \times 10^{-74}$ | 0.204     | Monocyte       | 20502693  |
| 12p13.31 | 9313304   | rs7968679  | $3.8 \times 10^{-12}$ | -199751 | 0.685 | rs1805664  | -14101    | C12orf33   | $3.4 \times 10^{-5}$  |           | Liver          | 18462017  |
| 12p13.31 | 9313304   | rs7968679  | $3.8 \times 10^{-12}$ | -94698  | 0.686 | rs10771309 | 124548    | PHC1       | $4.9 \times 10^{-11}$ | 0.031     | Monocyte       | 20502693  |

## Nearby Clinical Variants

| source  | region   | our.name   | our.pval              | dist   | rsqr  | assay.name | gene   | phenotype                        | accession         |
|---------|----------|------------|-----------------------|--------|-------|------------|--------|----------------------------------|-------------------|
| clinvar | 10q25.2  | rs56299331 | $1.1 \times 10^{-16}$ | -30087 | 0.593 | rs7903146  | TCF7L2 | Diabetes mellitus type 2         | SNOMED CT44054006 |
| clinvar | 10q25.2  | rs56299331 | $1.1 \times 10^{-16}$ | 20466  | 0.665 | rs12255372 | TCF7L2 | Diabetes mellitus type 2         | SNOMED CT44054006 |
| clinvar | 12p13.31 | rs7968679  | $3.8 \times 10^{-12}$ | -81036 | 0.692 | rs669      | A2M    | Alzheimer's disease              | SNOMED CT26929004 |
| clinvar | 12p13.31 | rs7968679  | $3.8 \times 10^{-12}$ | -81036 | 0.692 | rs669      | A2M    | Alpha-2-macroglobulin deficiency | NCBI curation     |

## Regional Association Plots



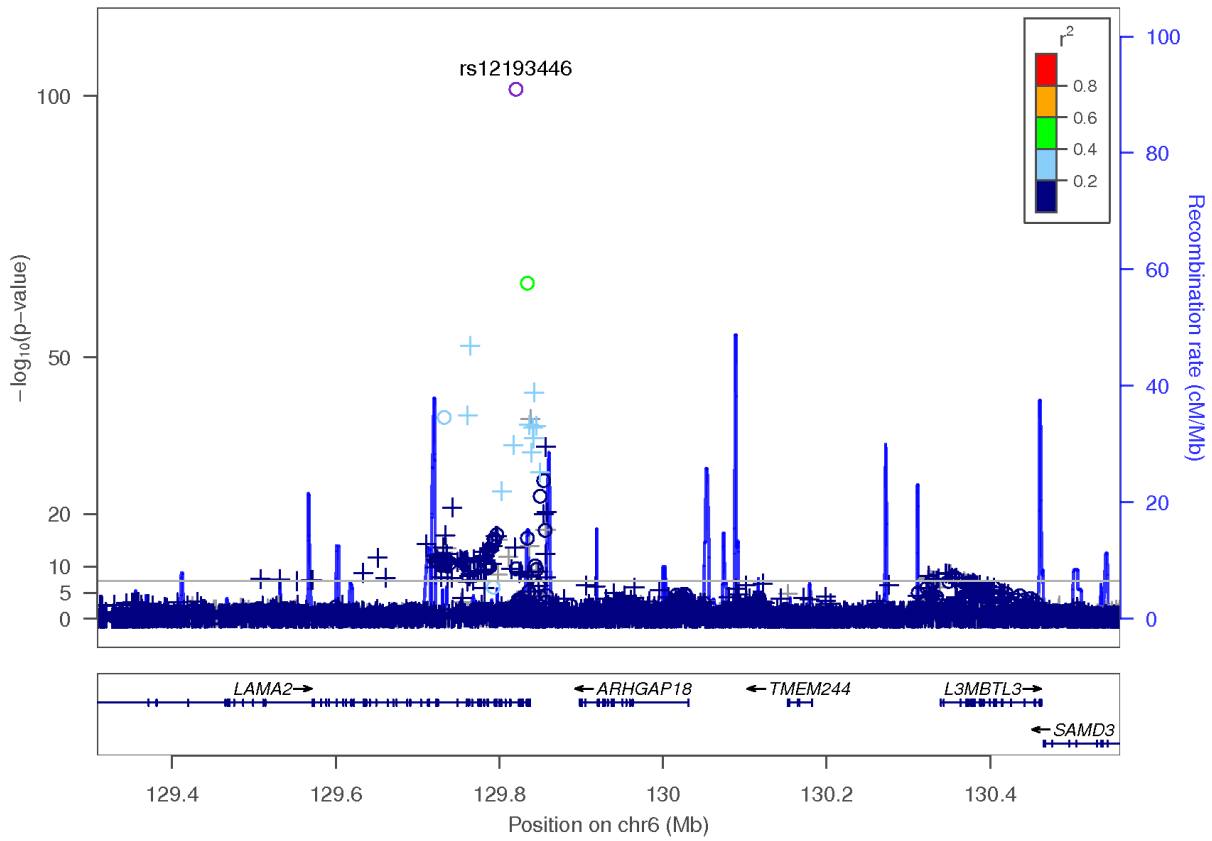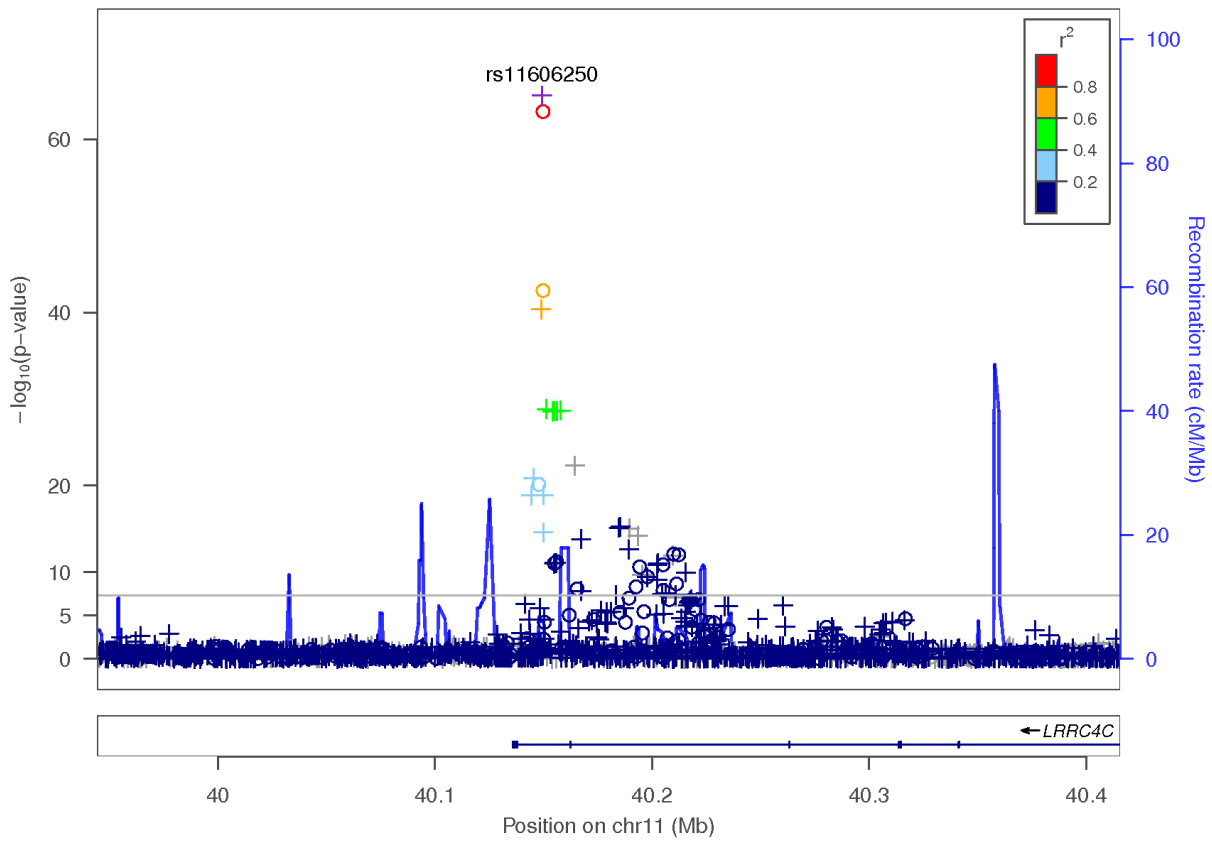

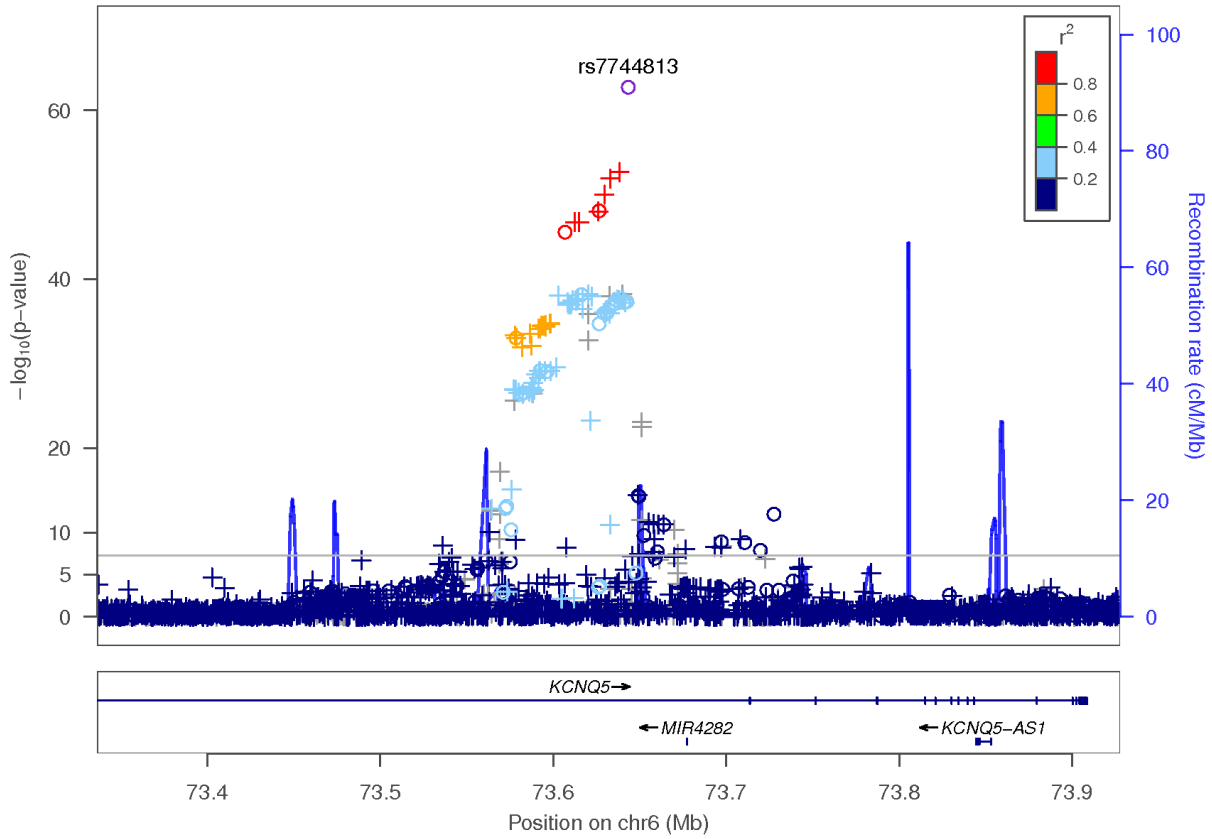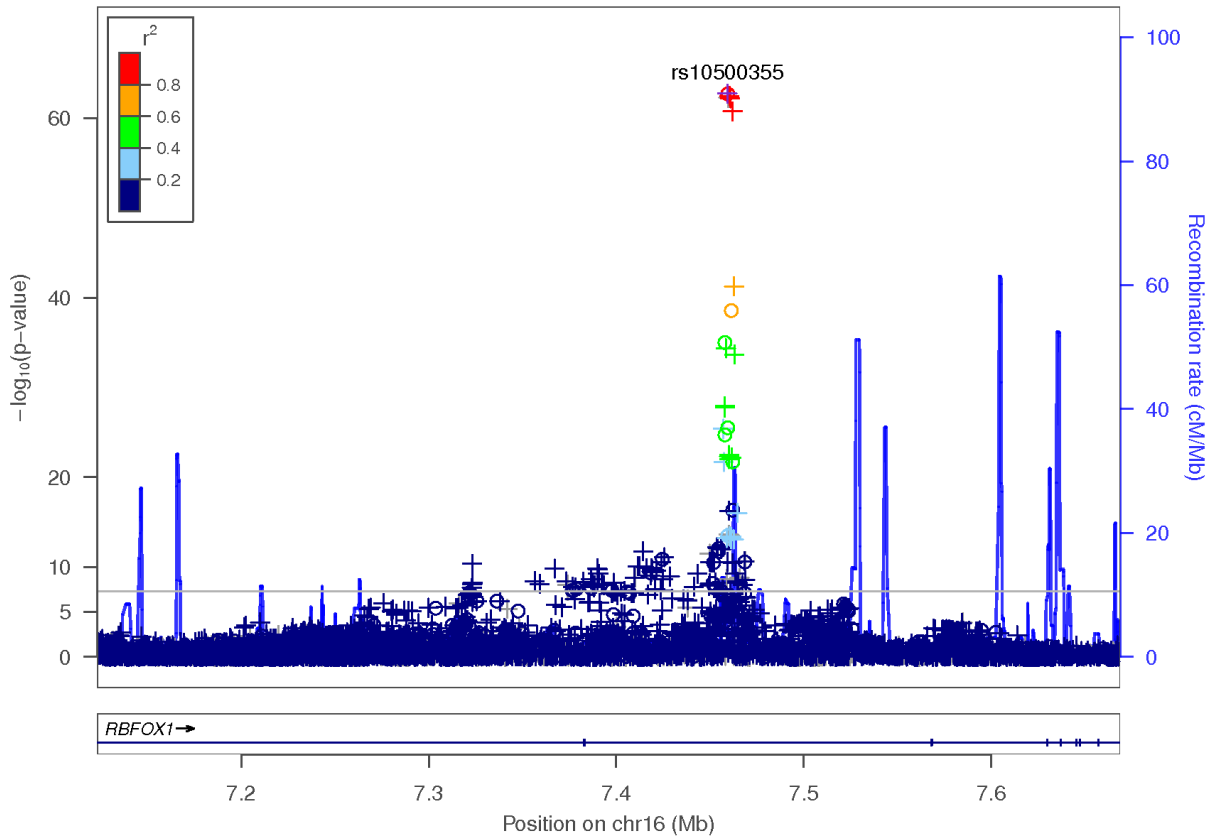

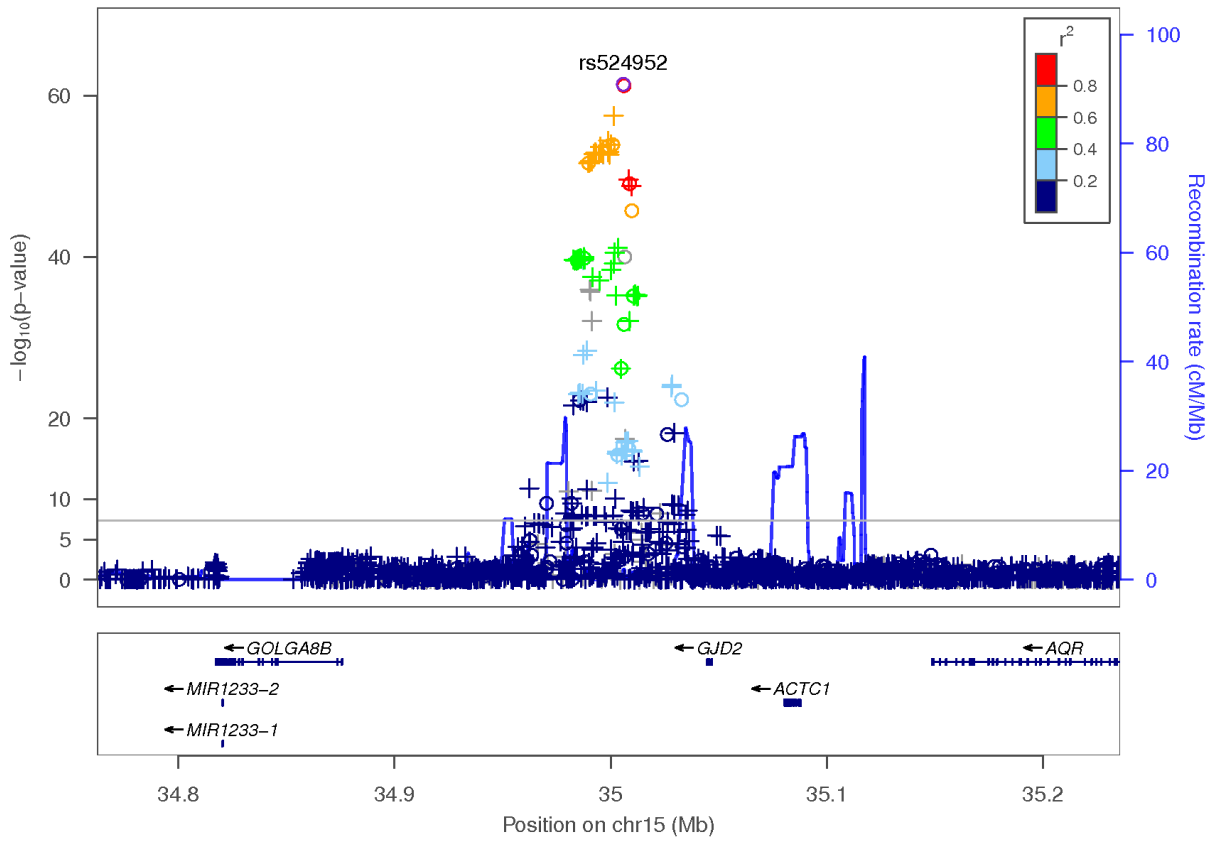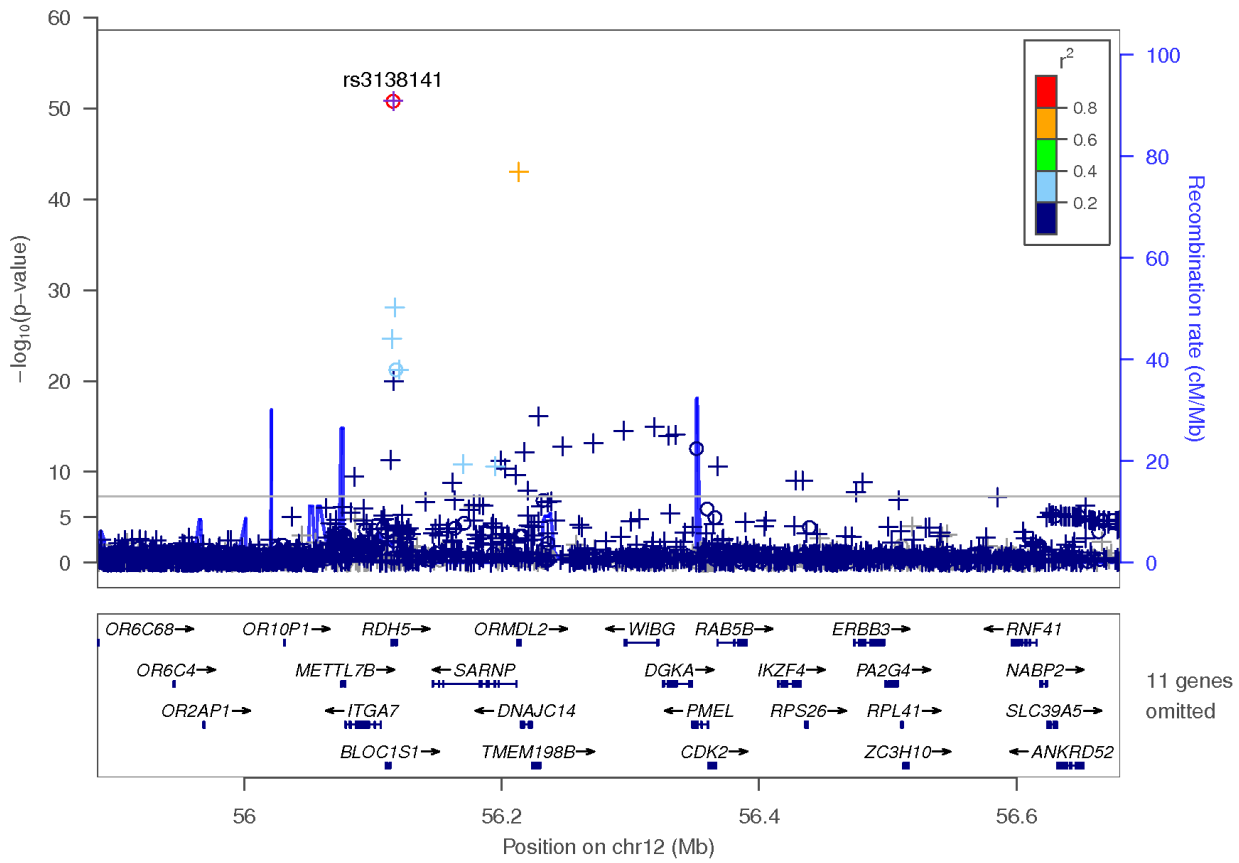

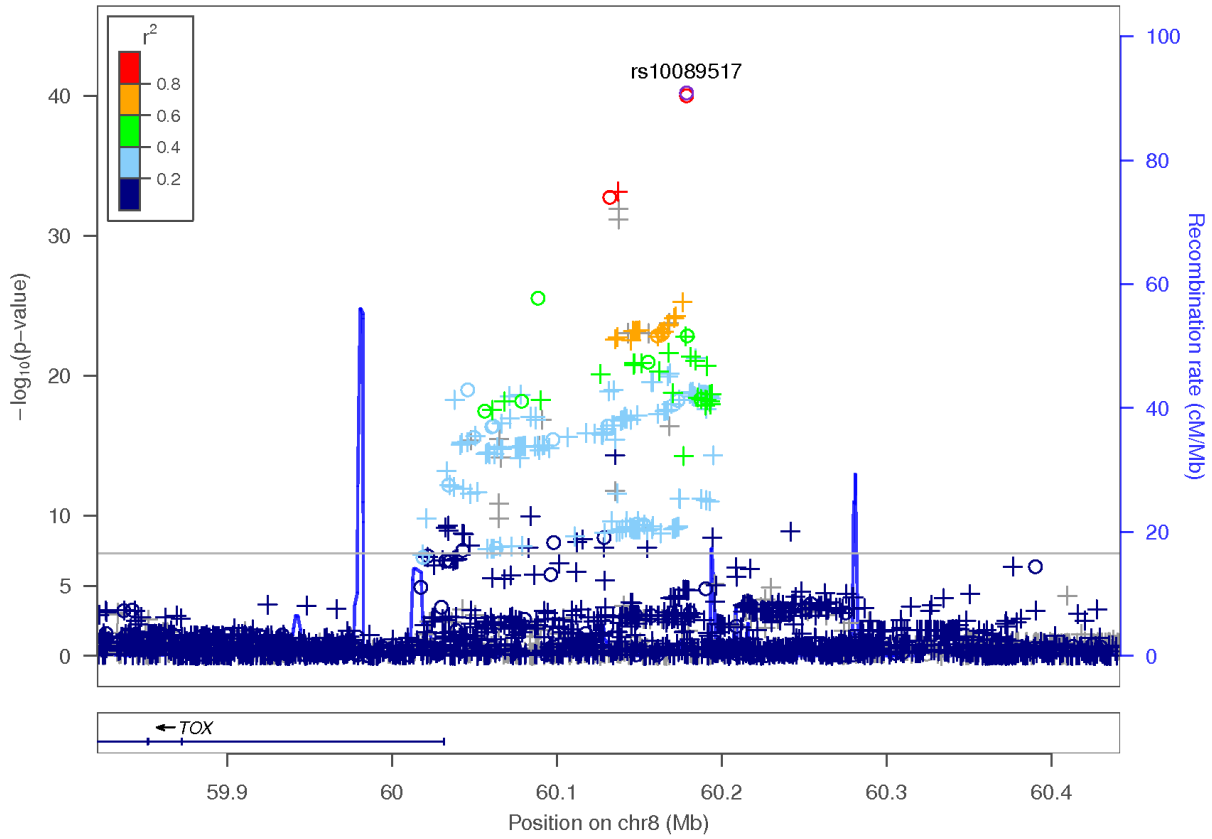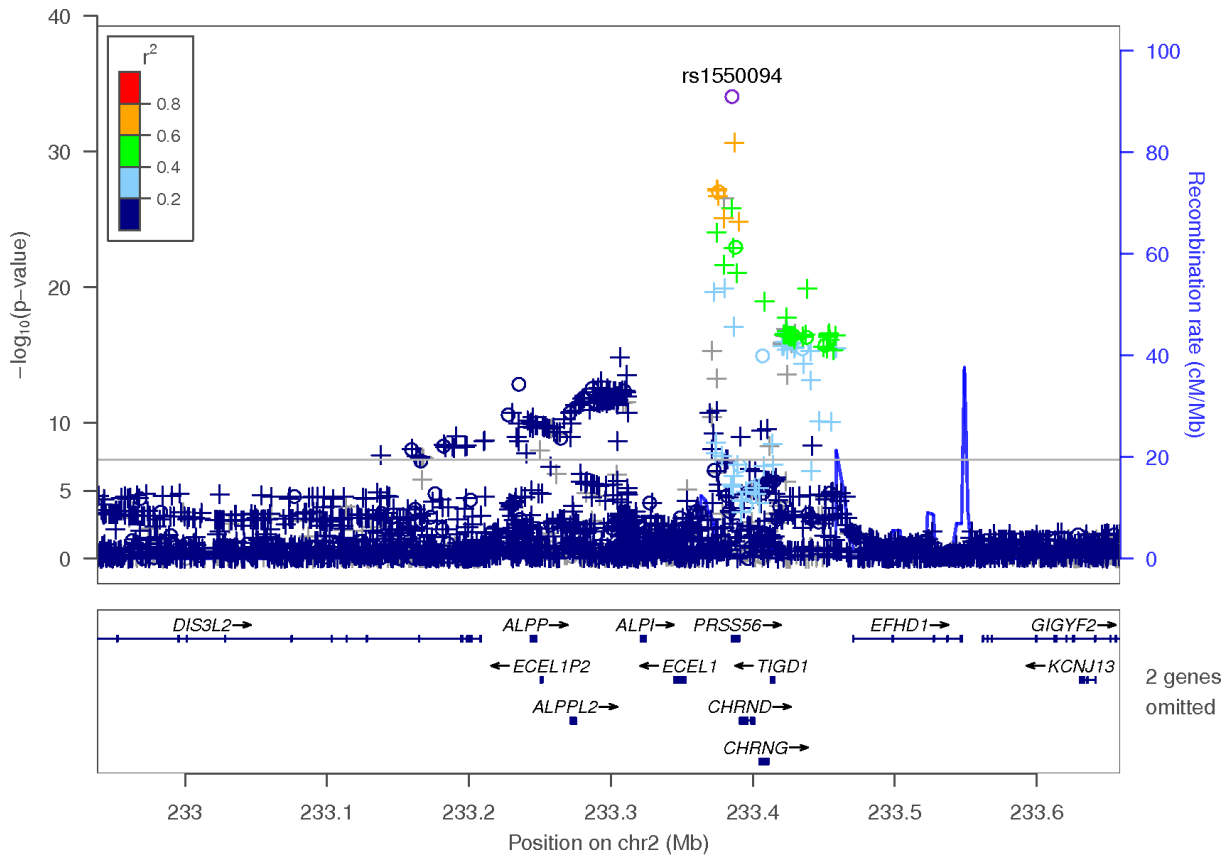

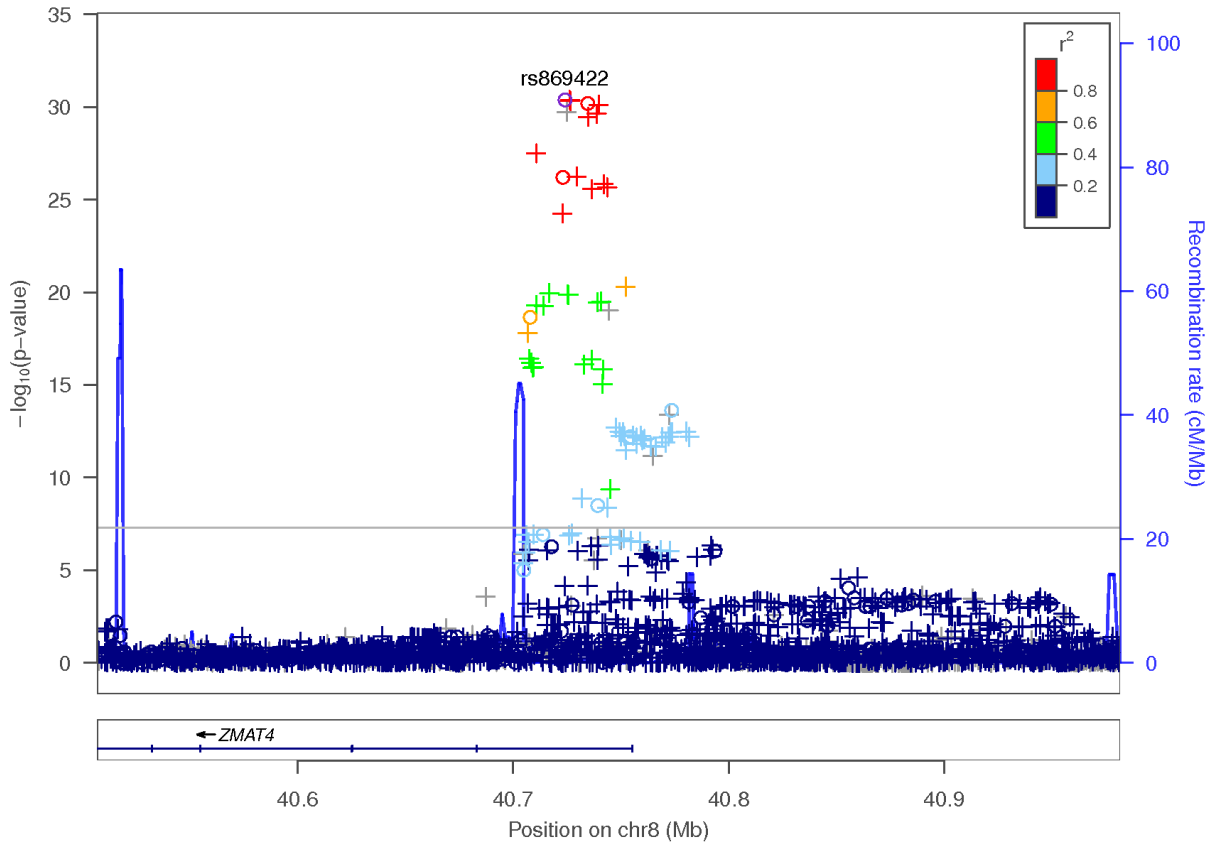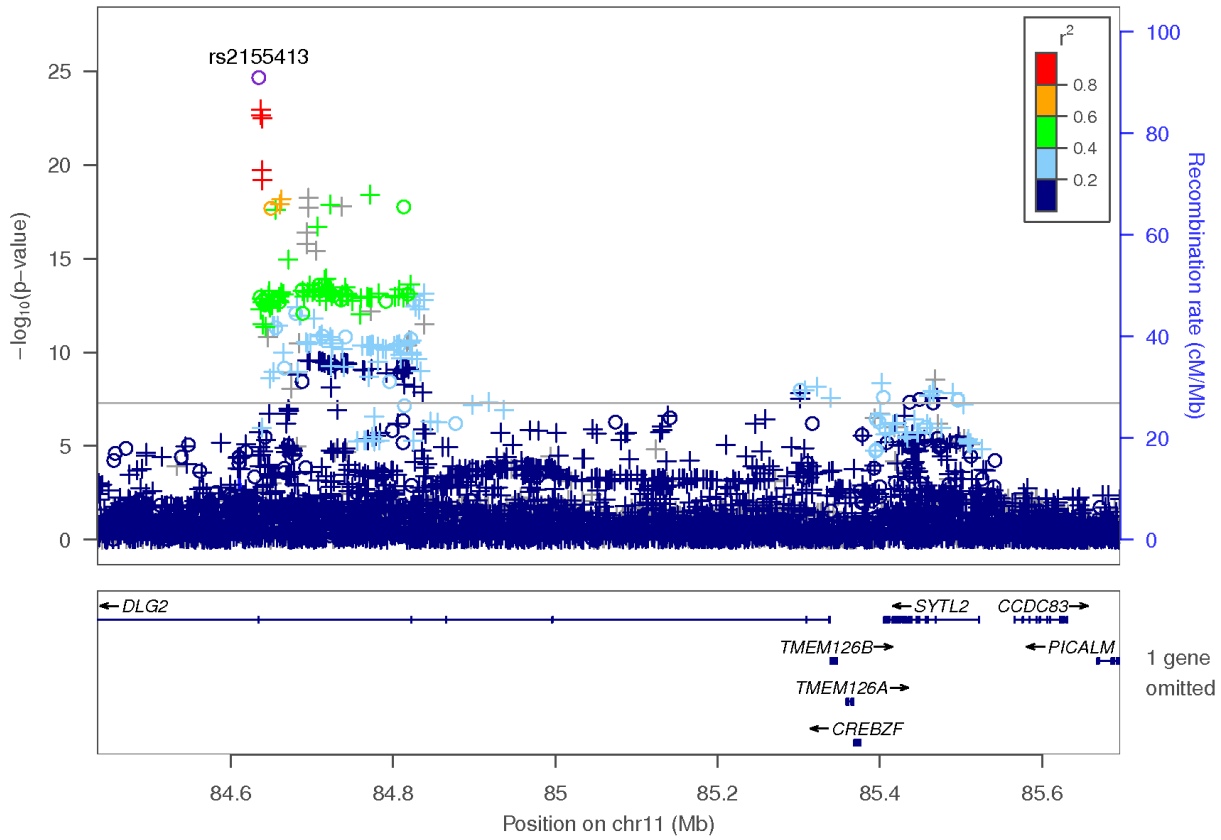

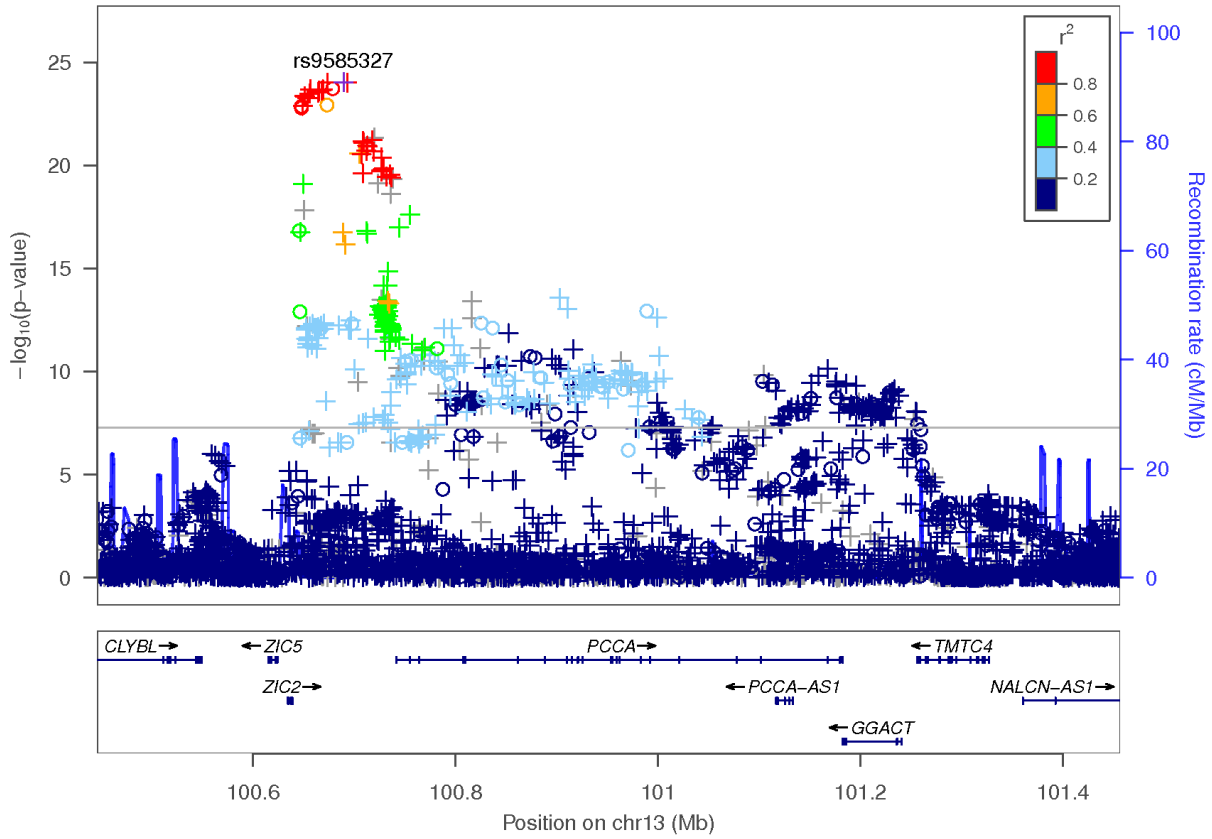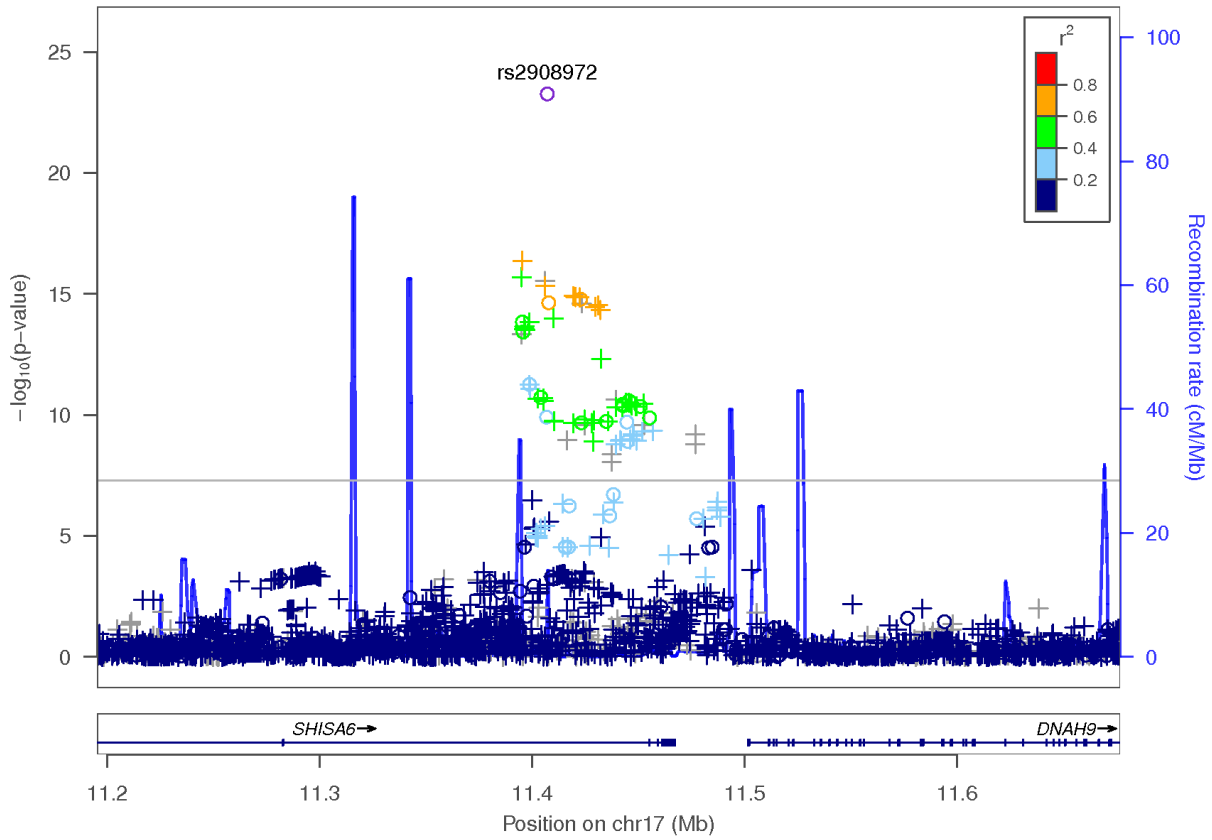

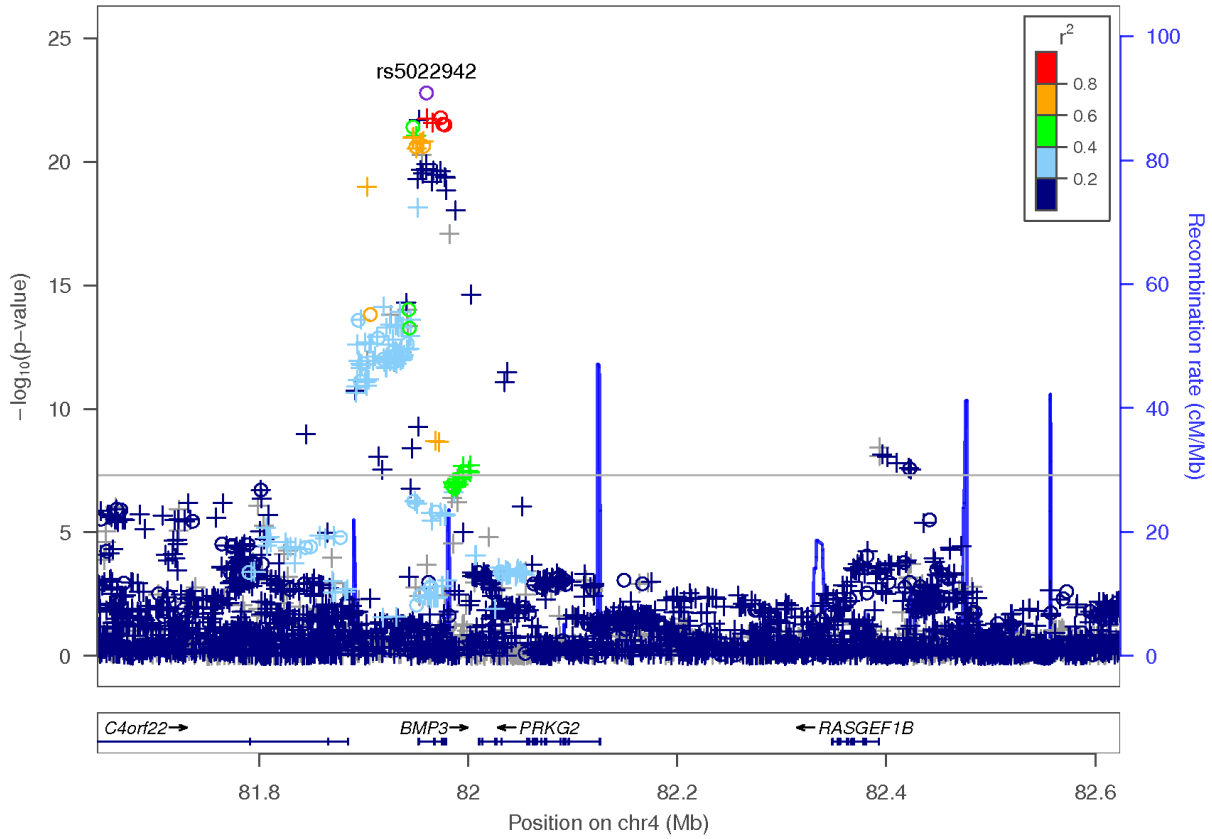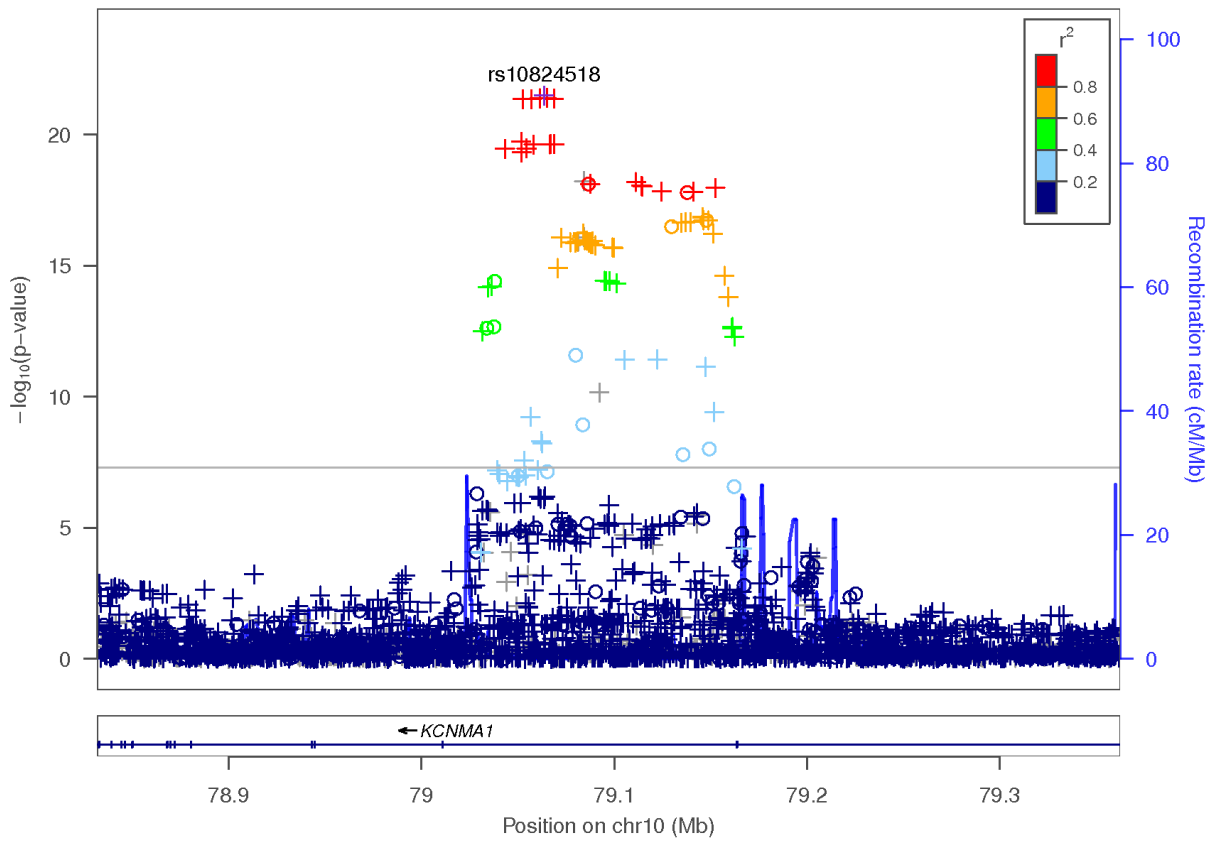

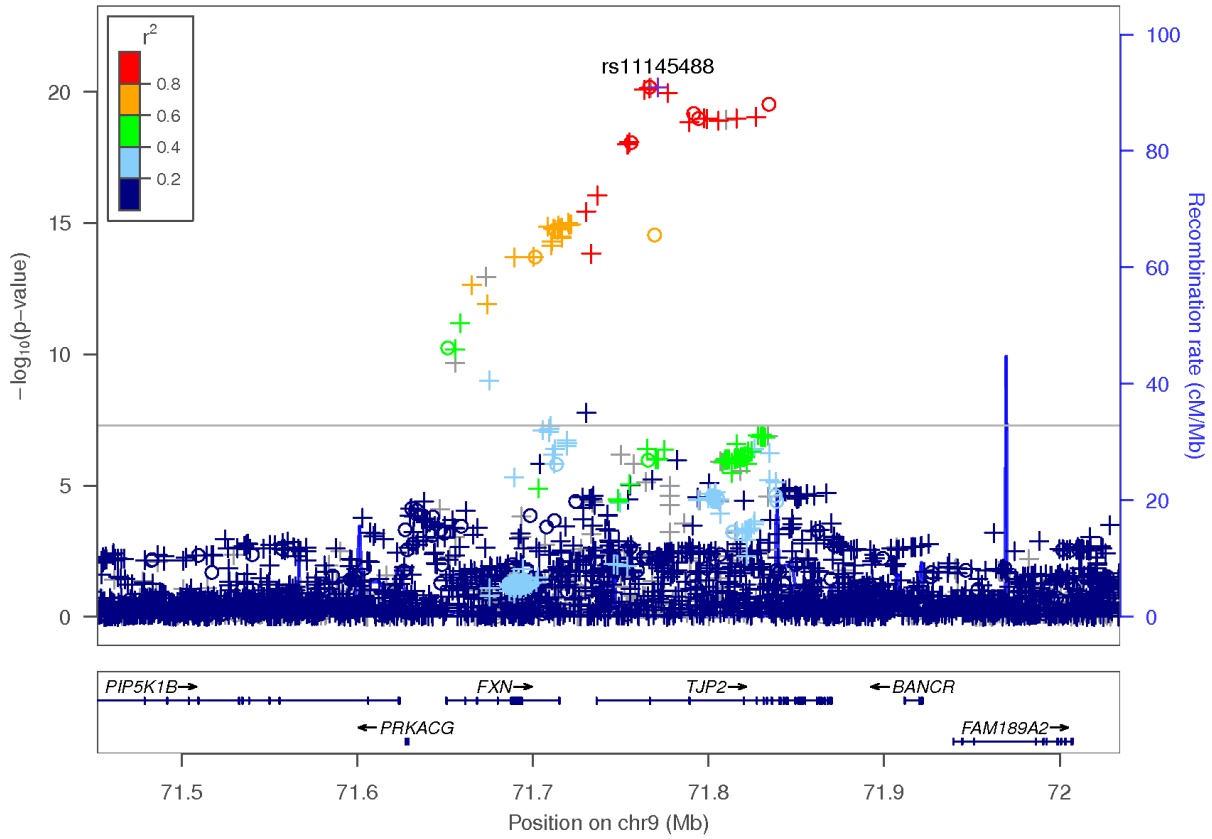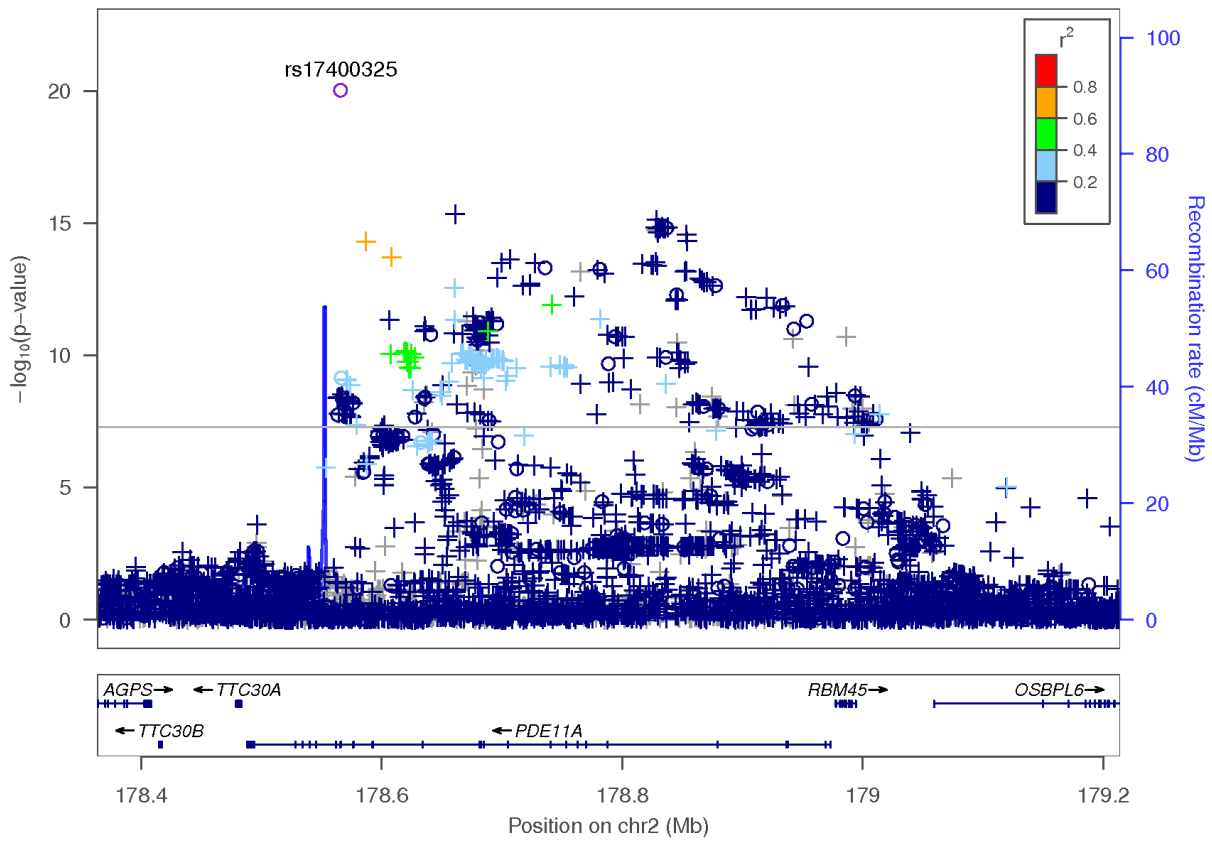



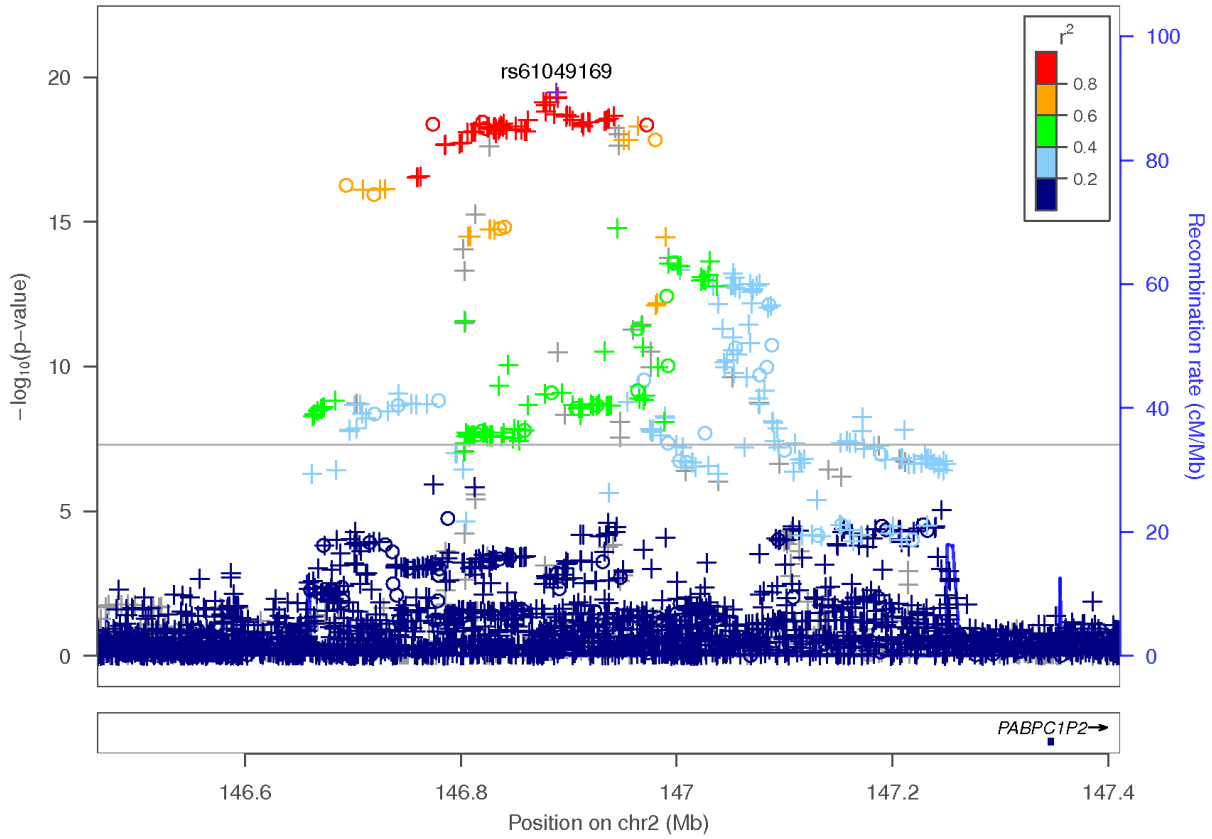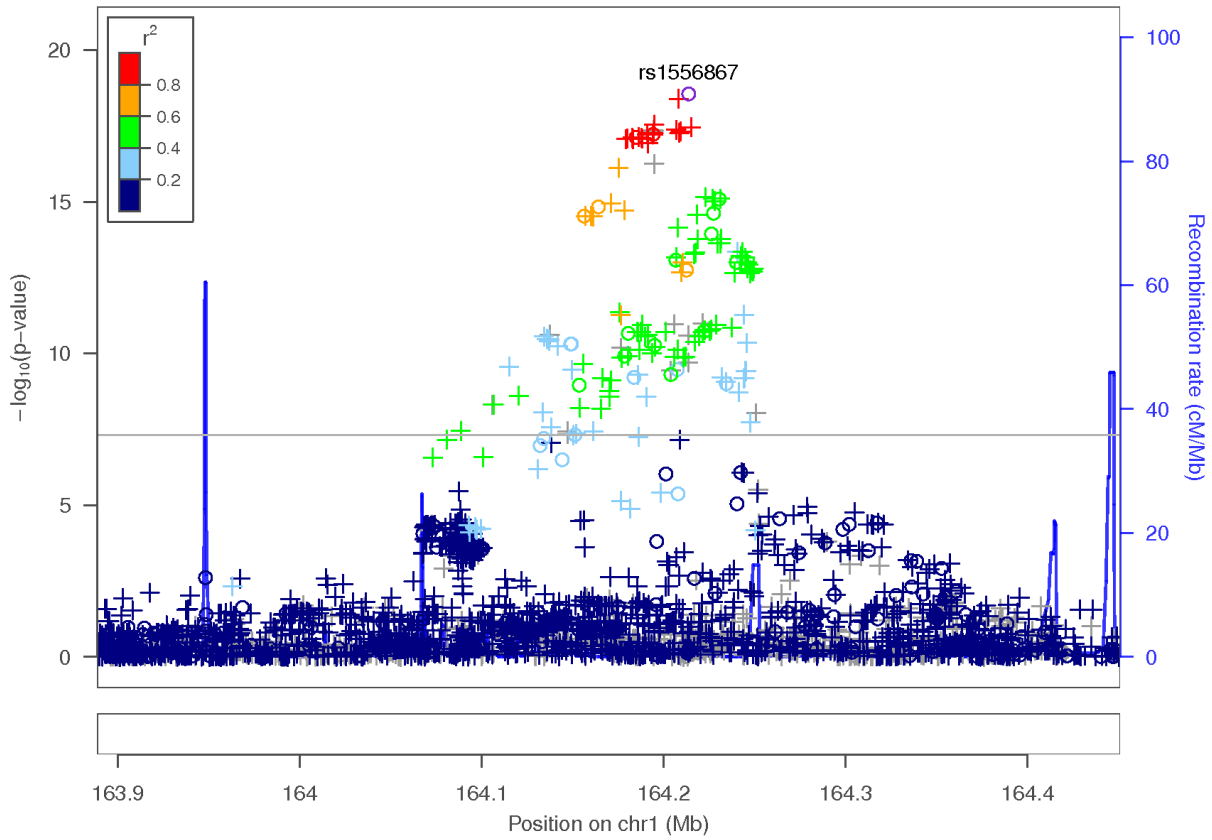

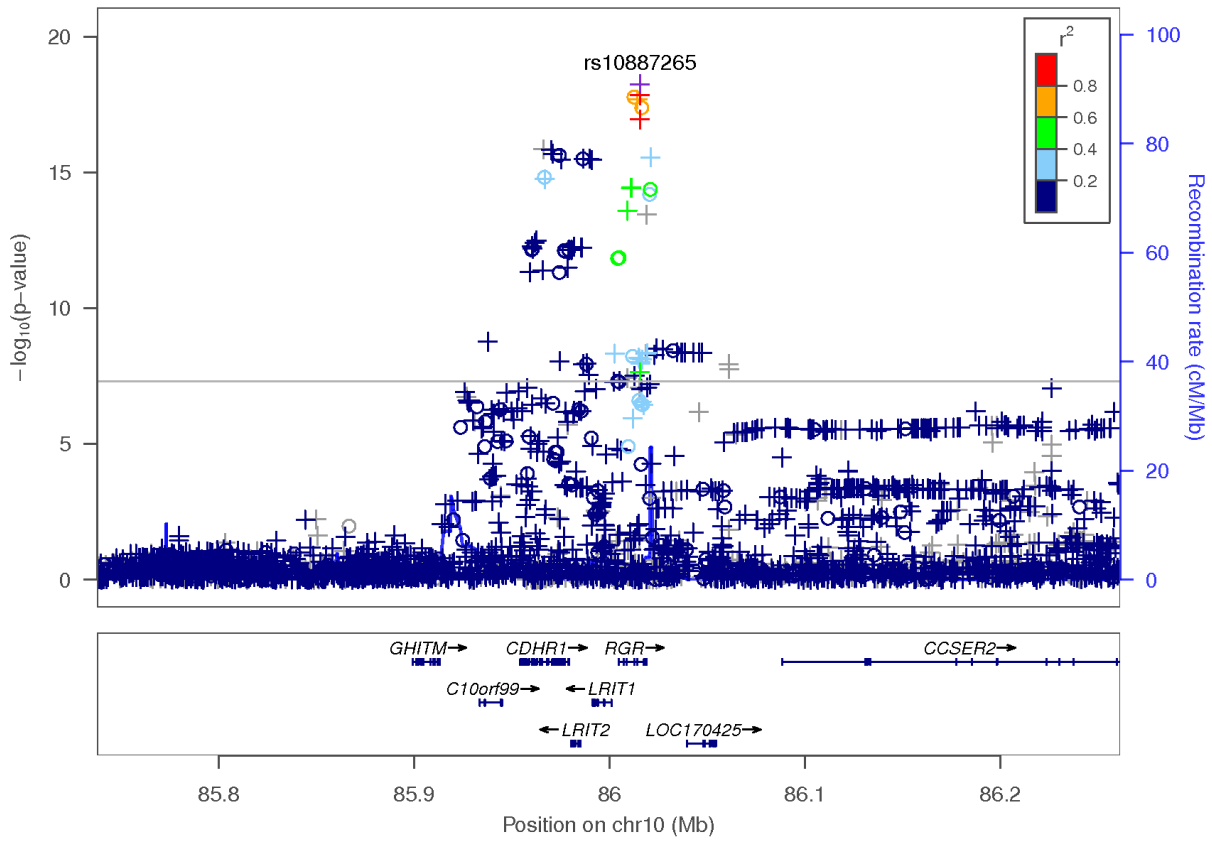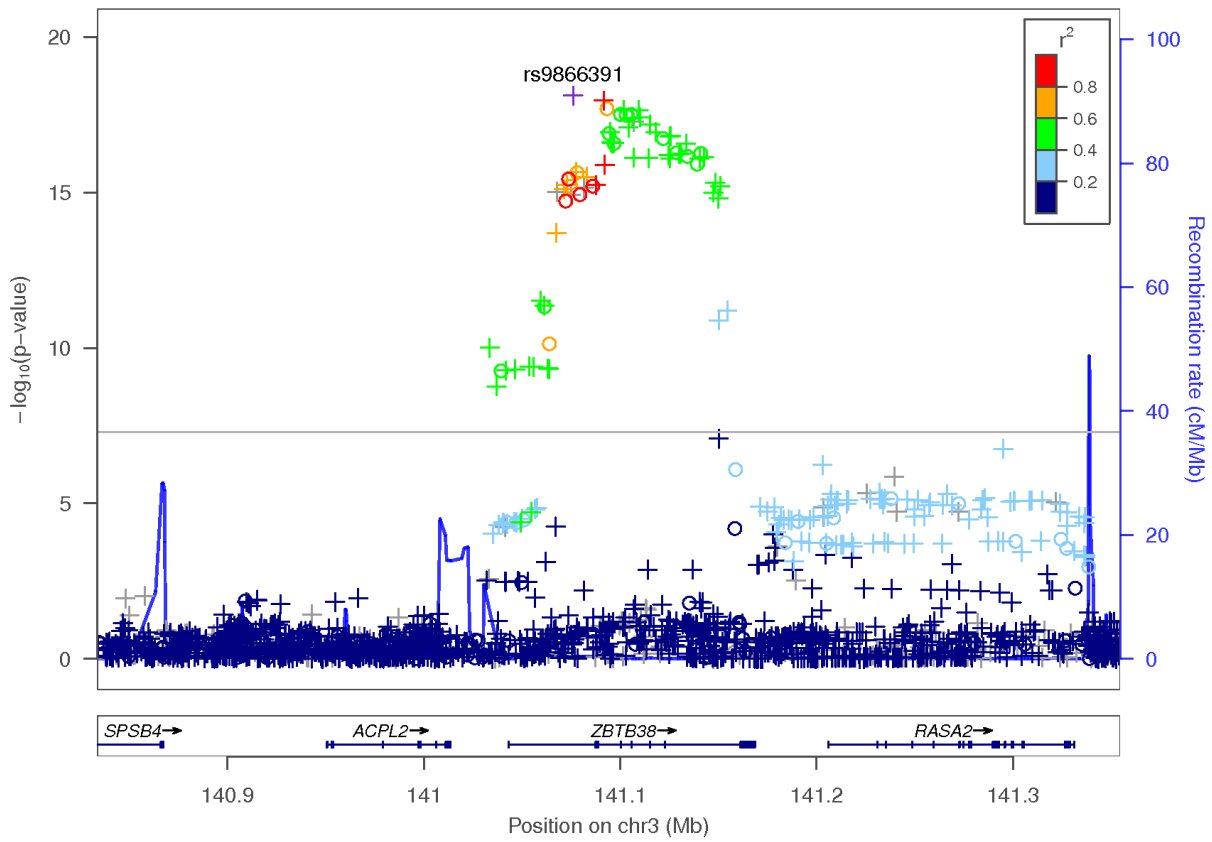

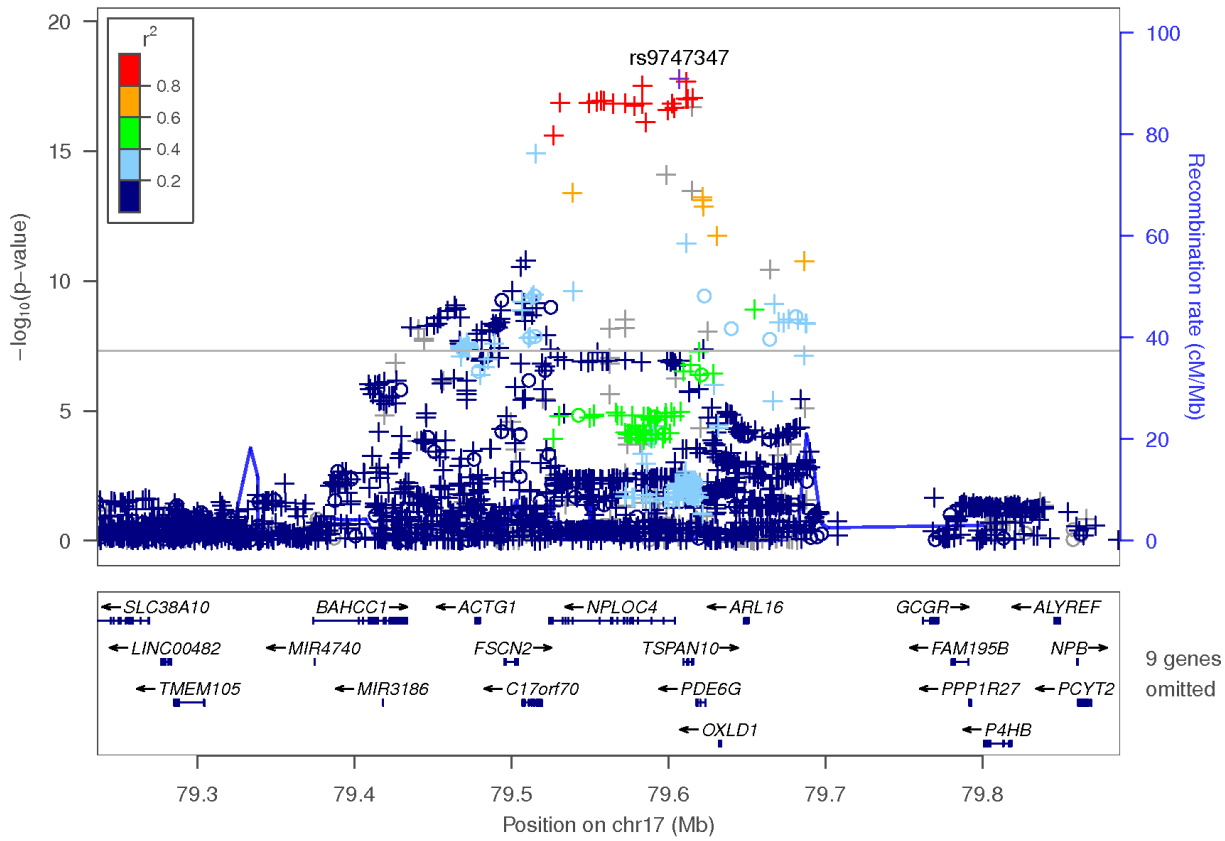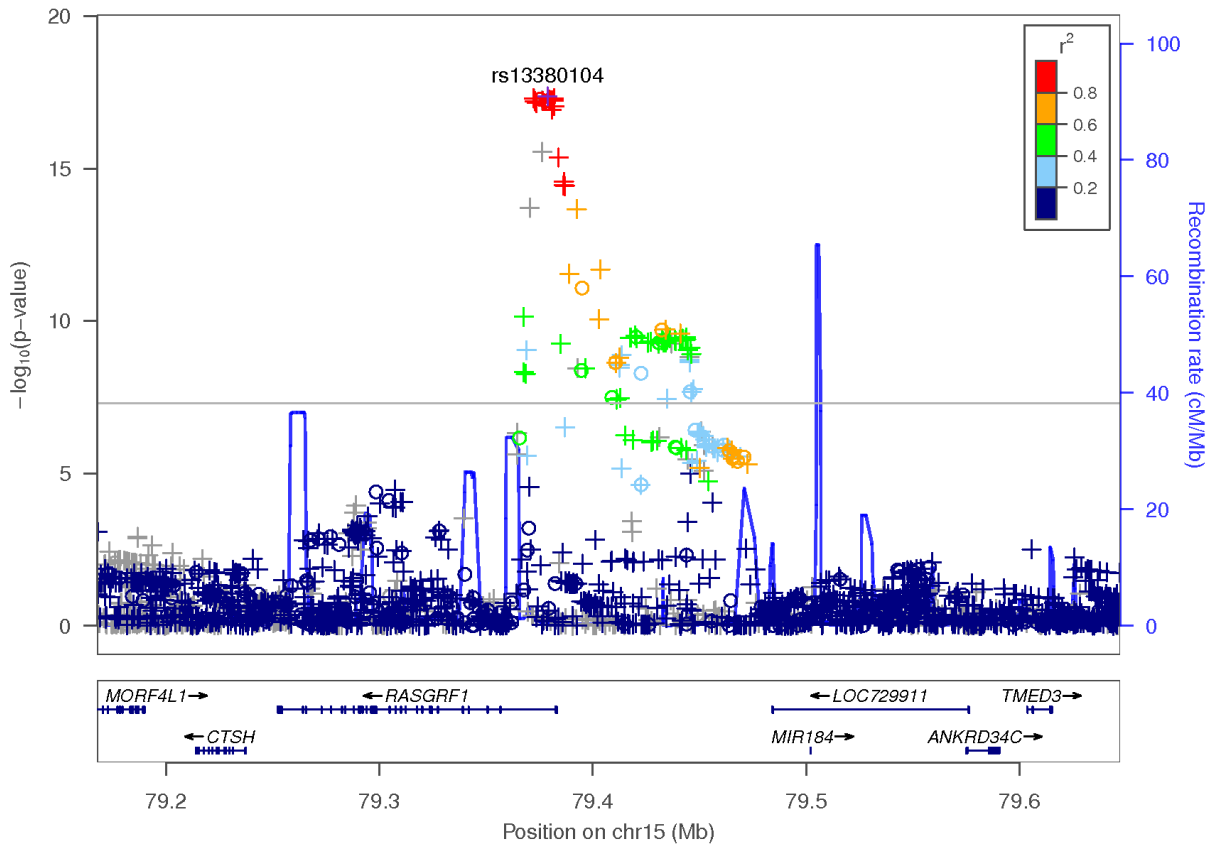

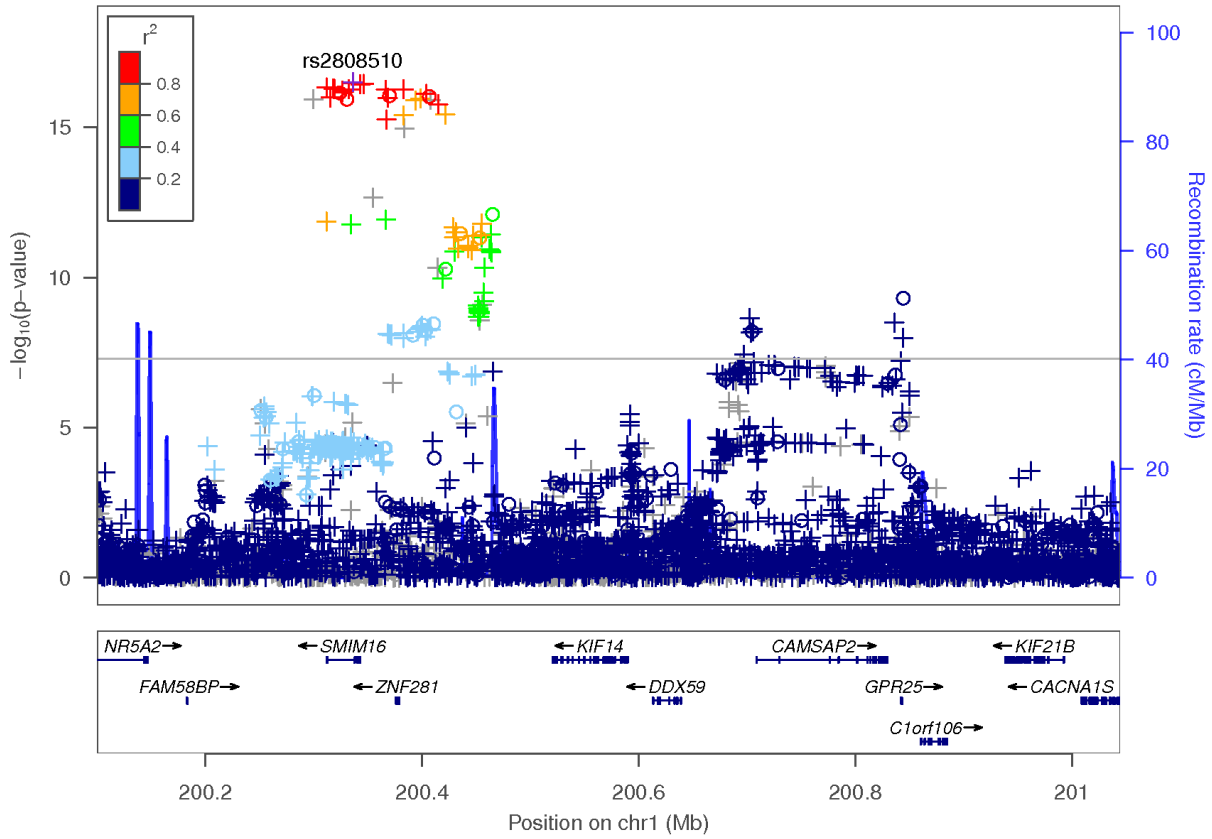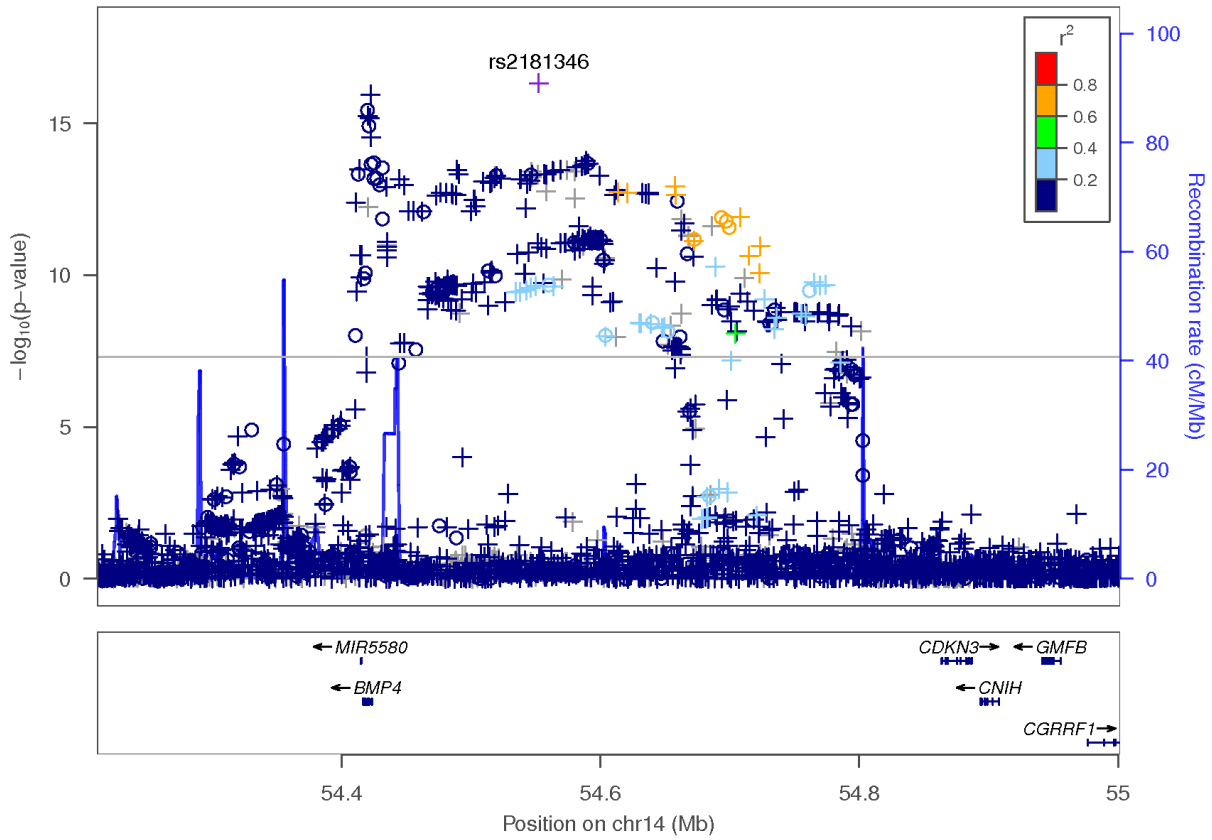

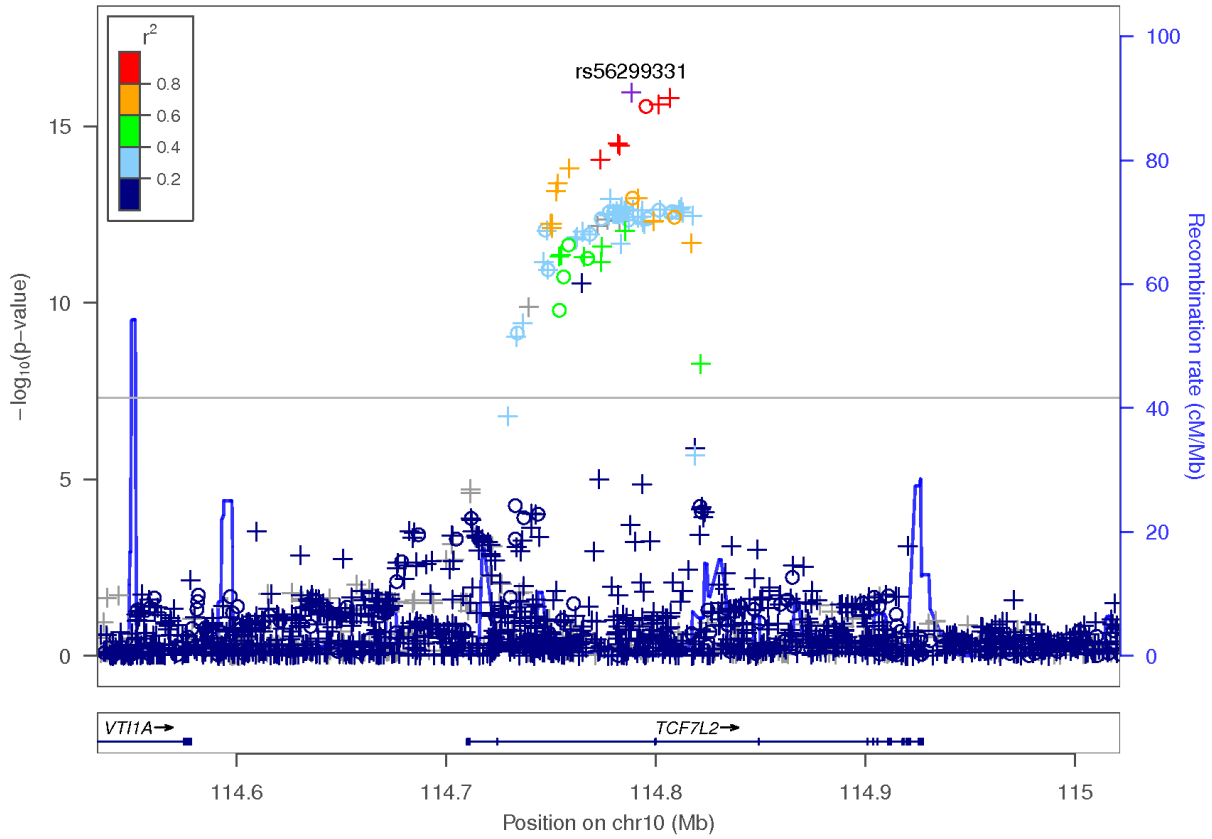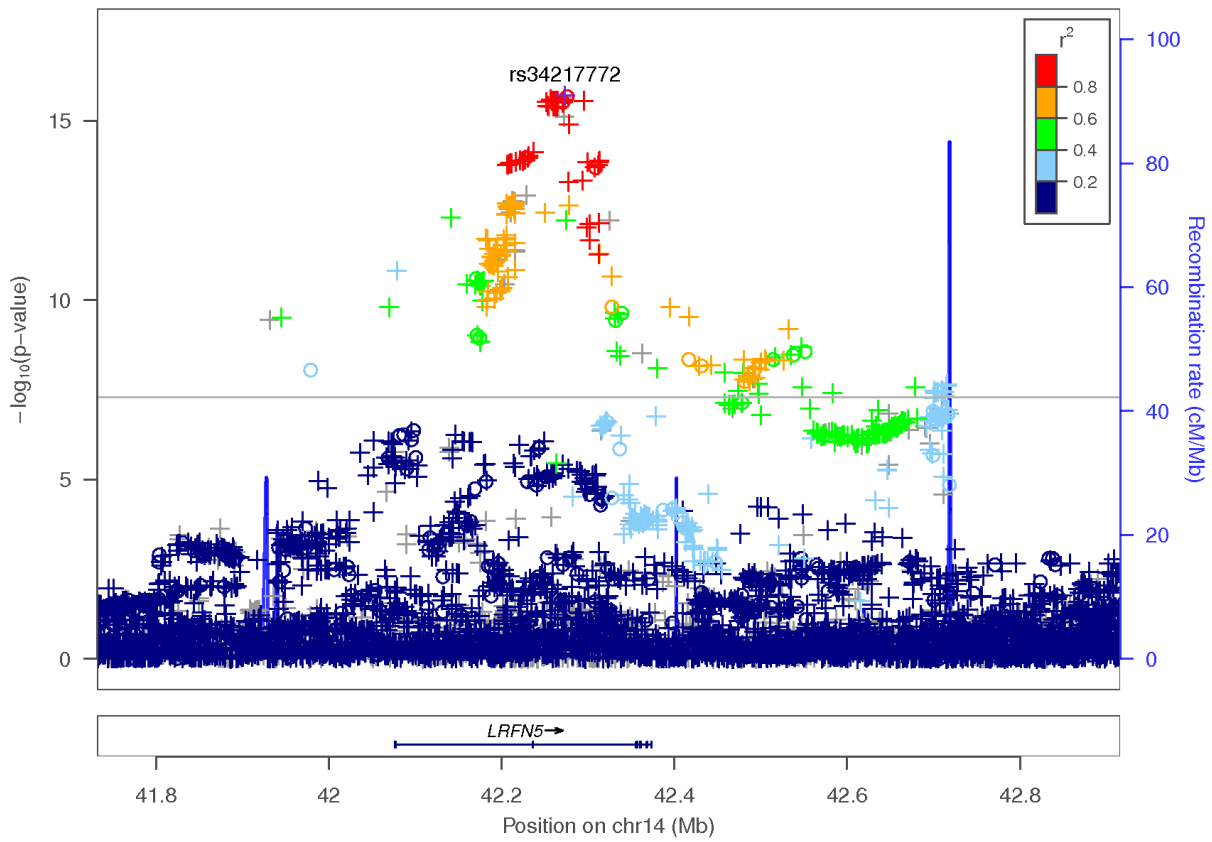

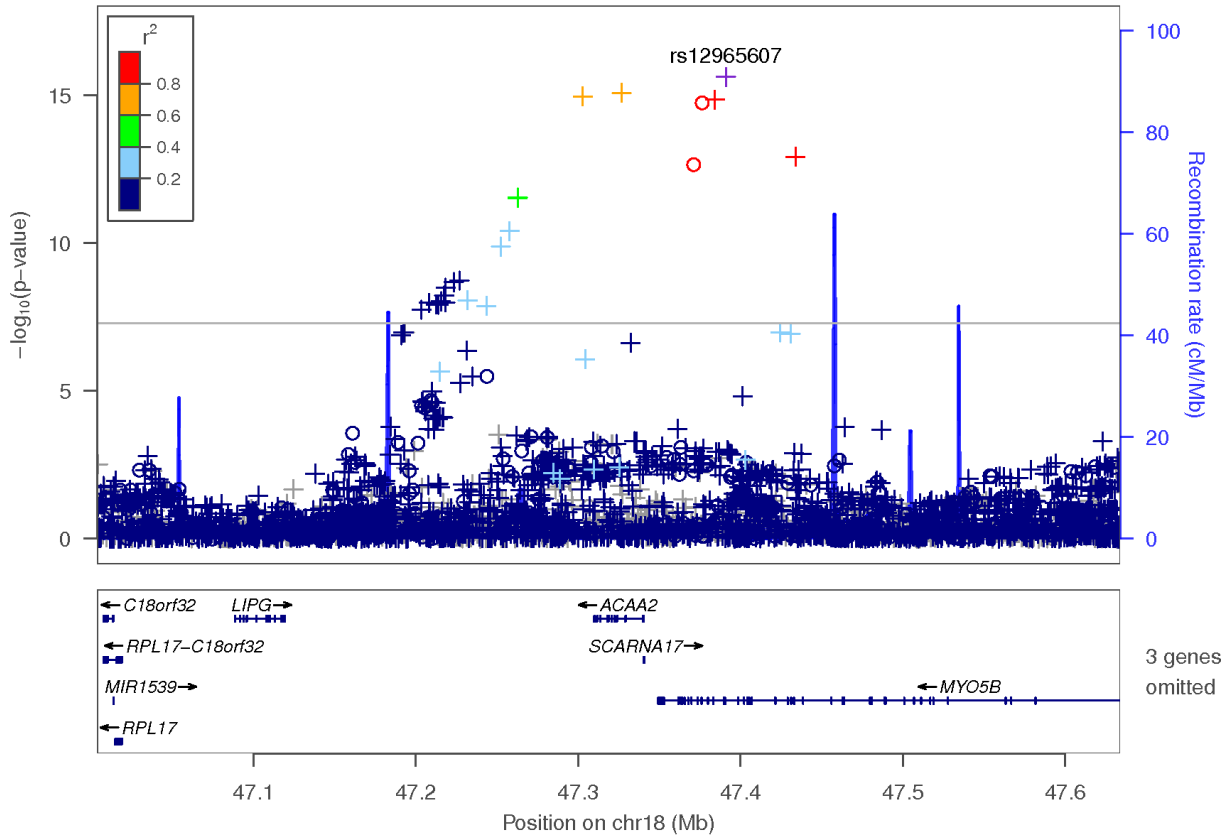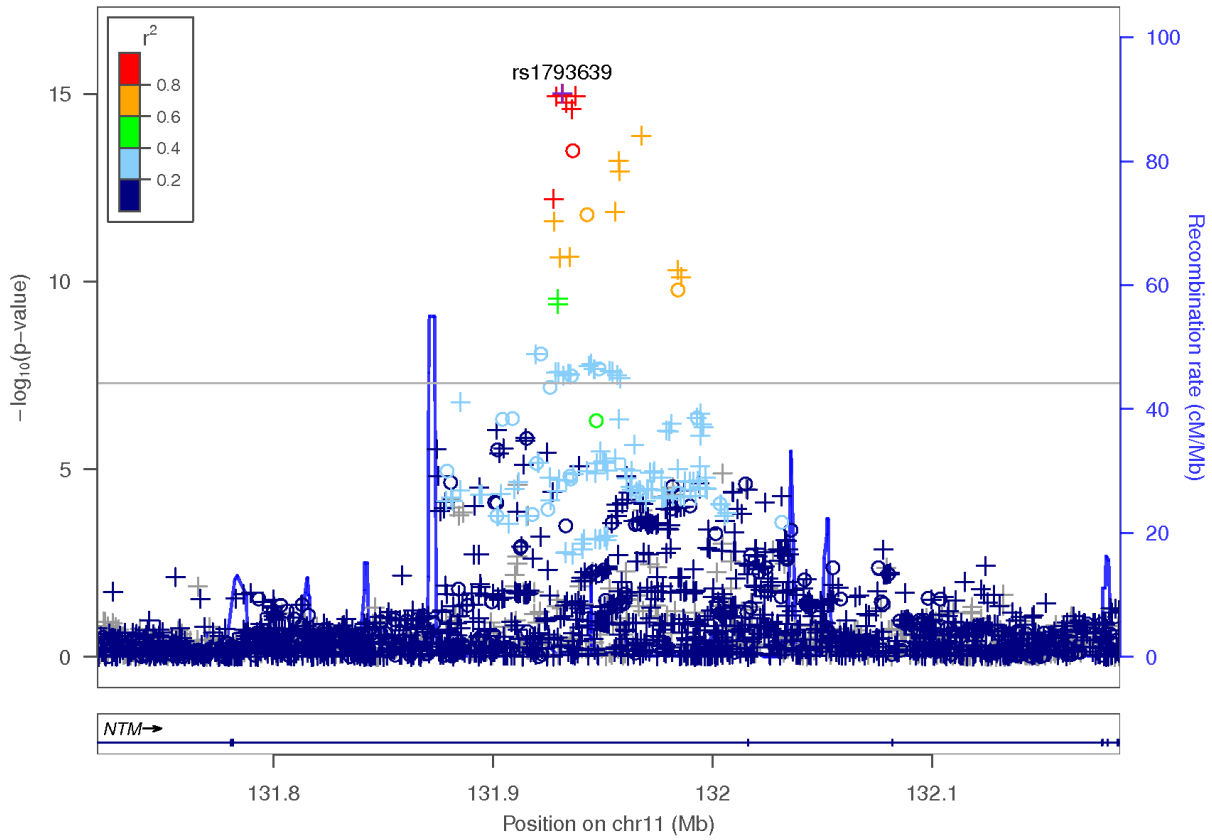

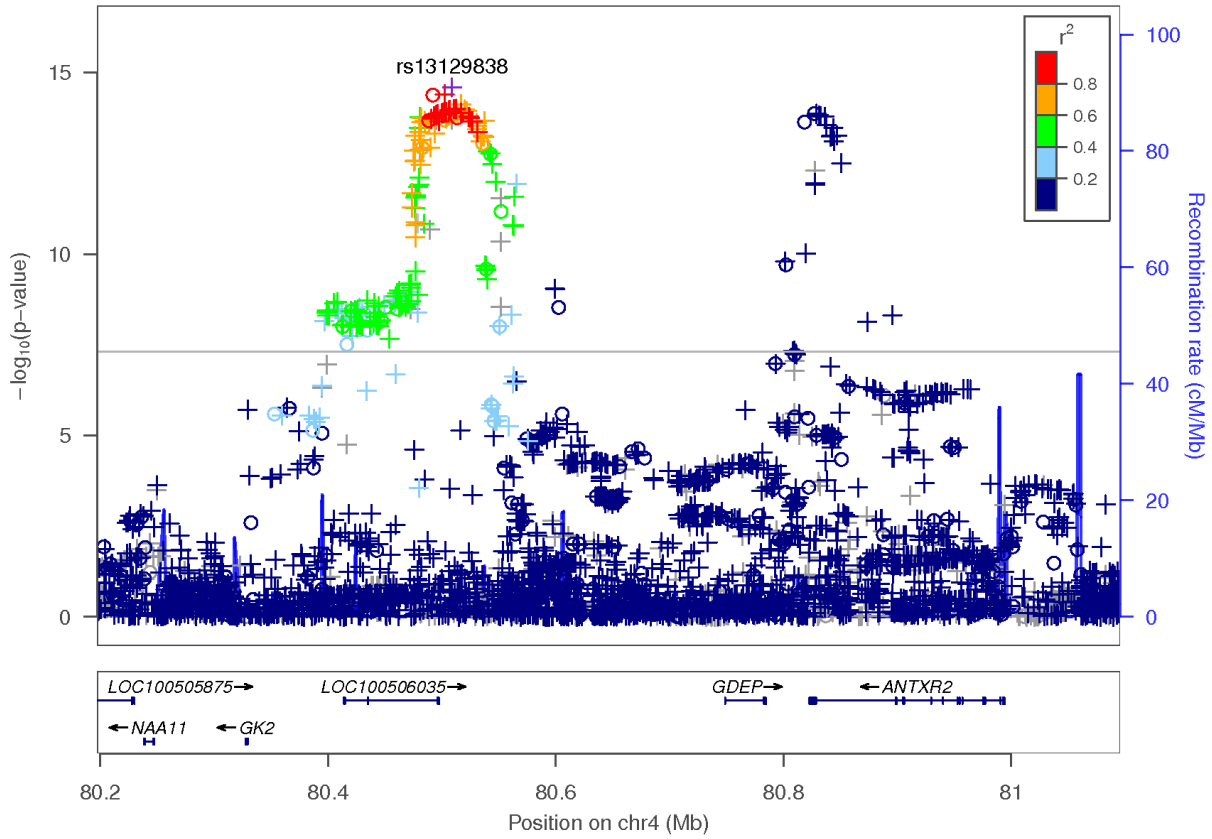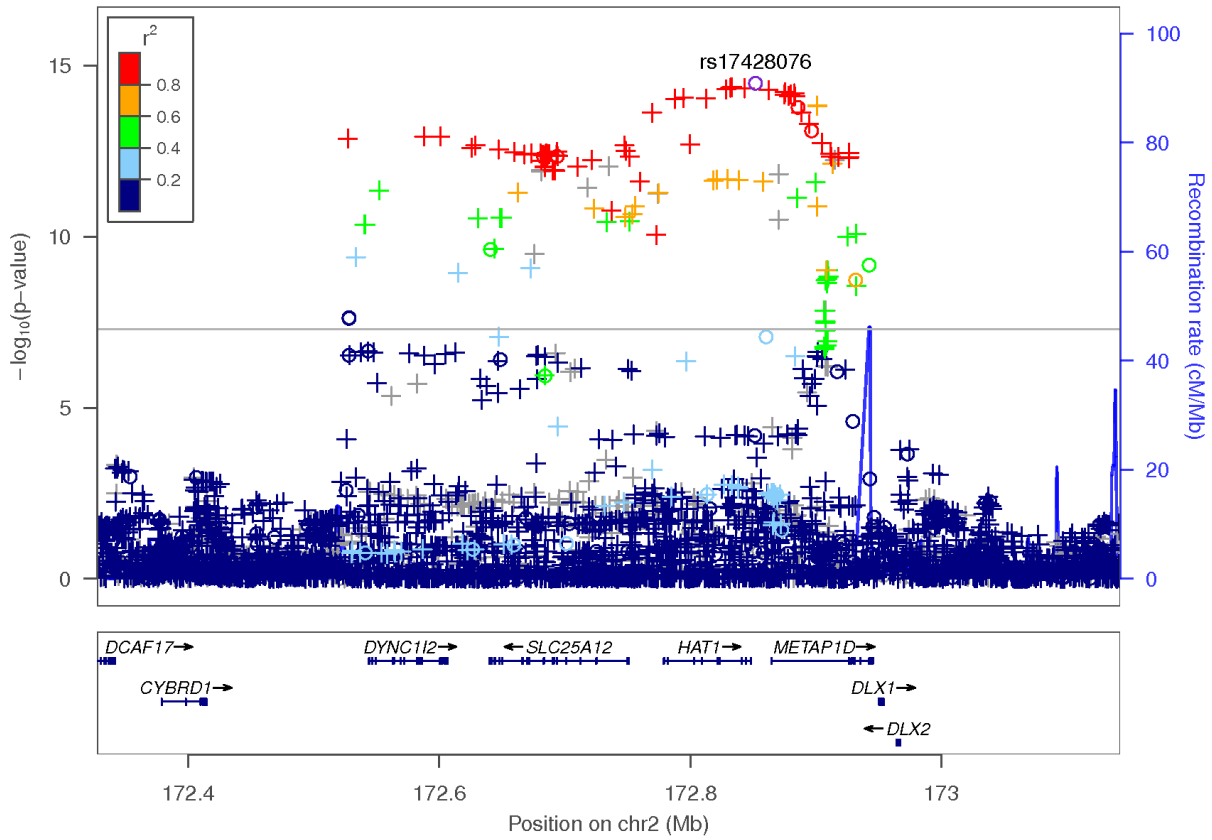

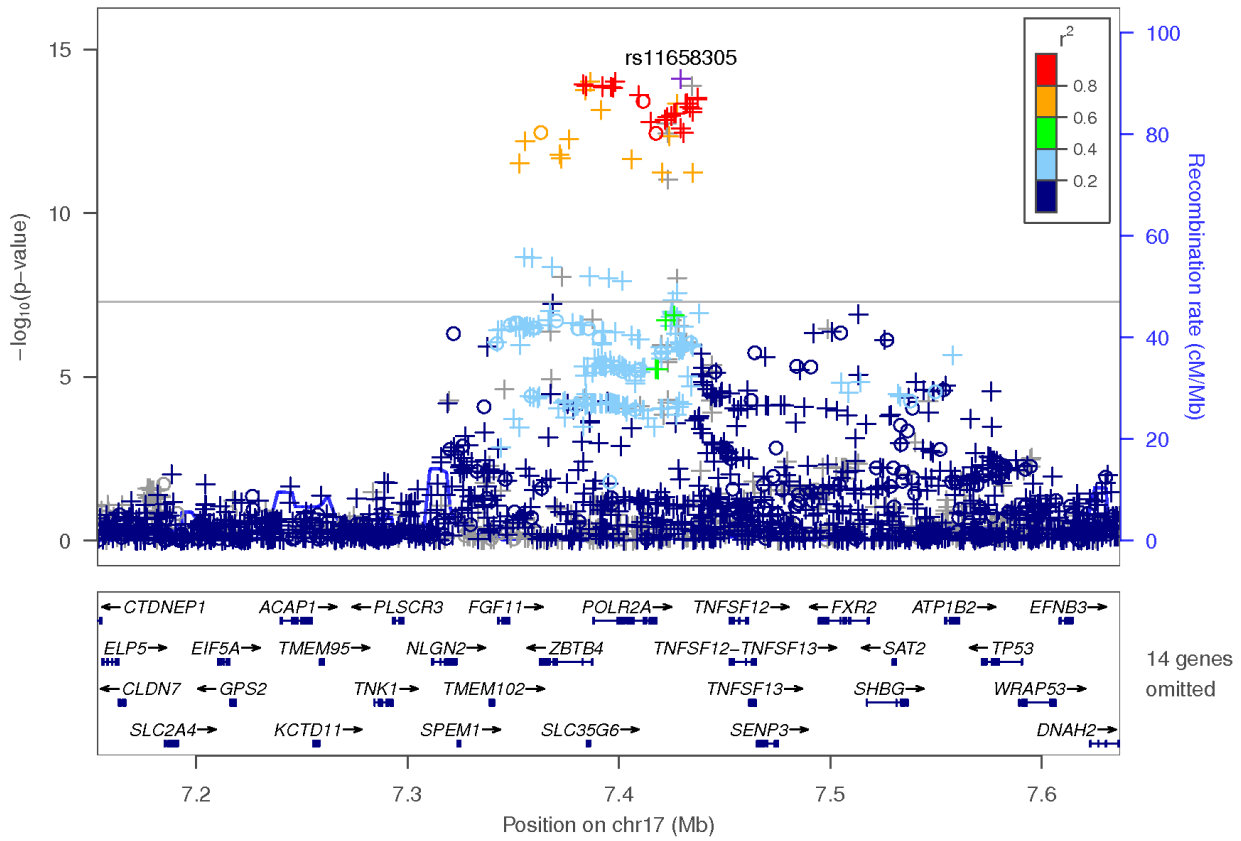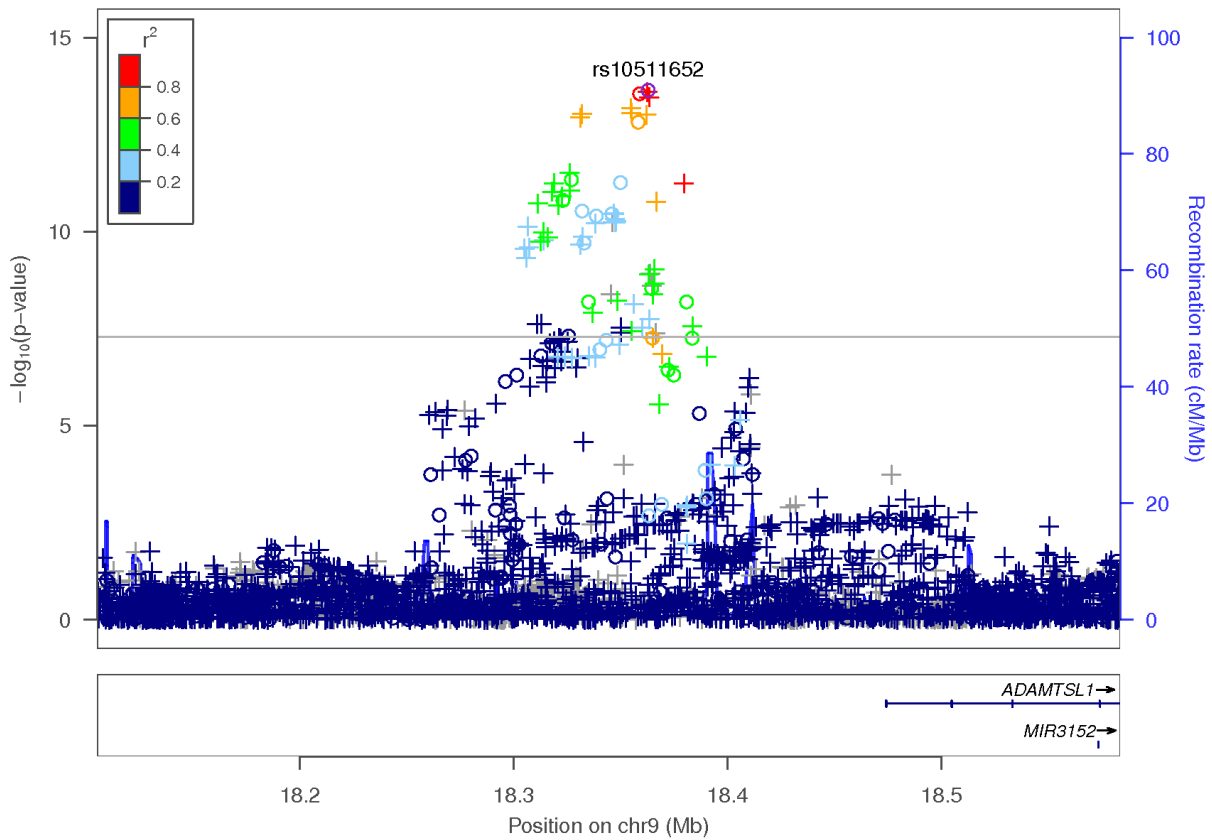



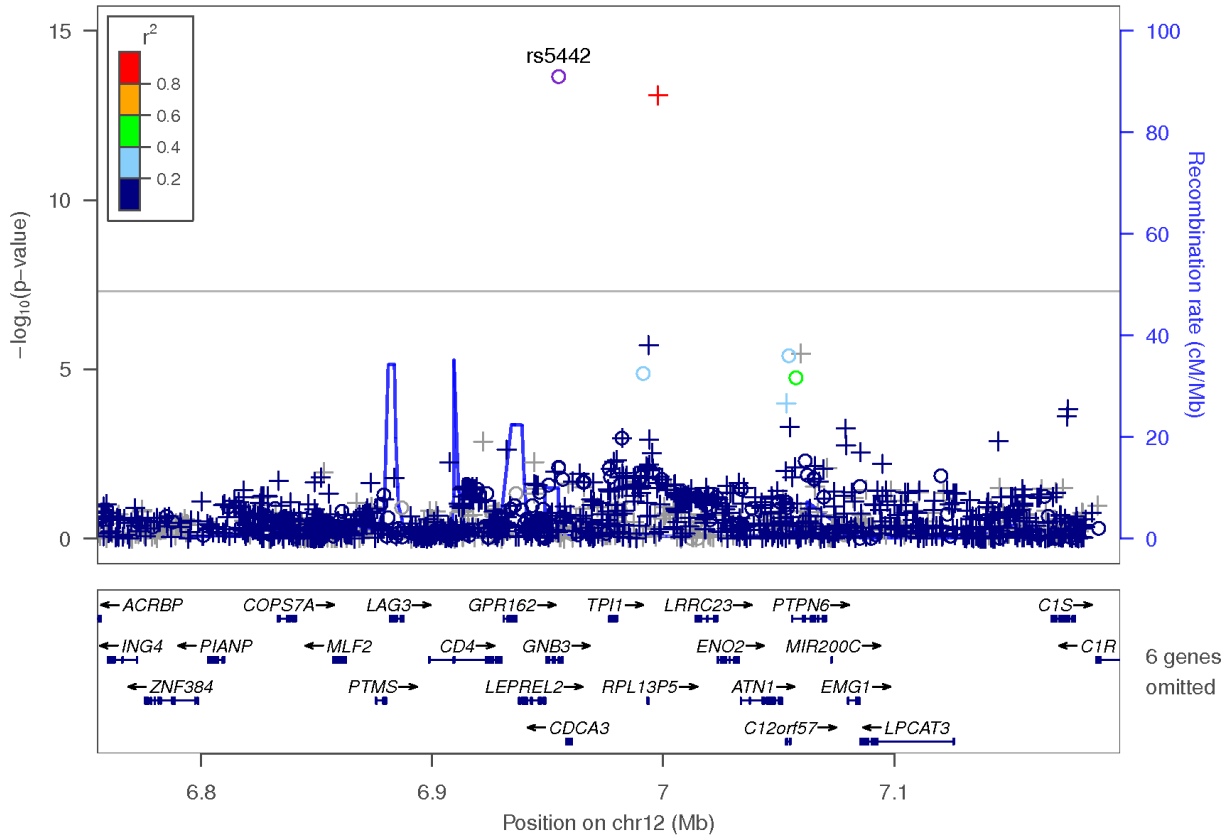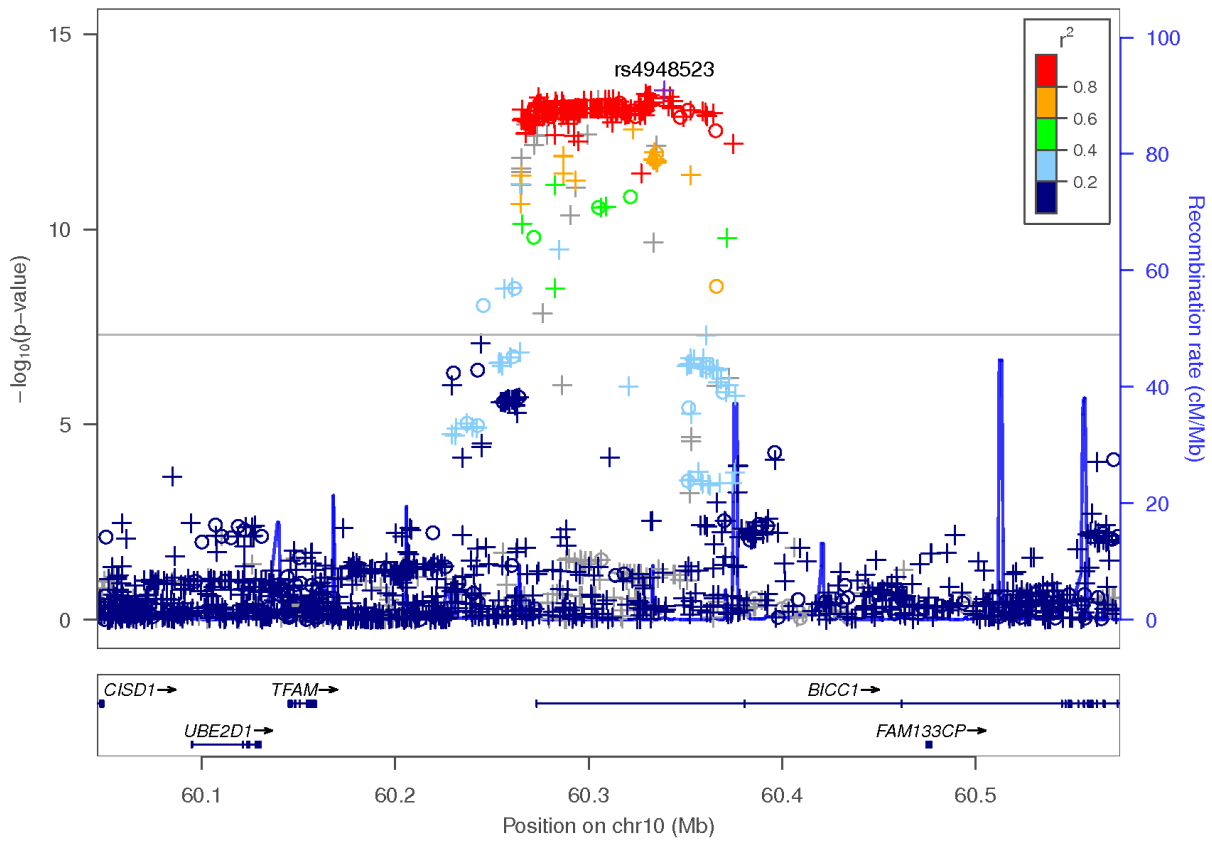

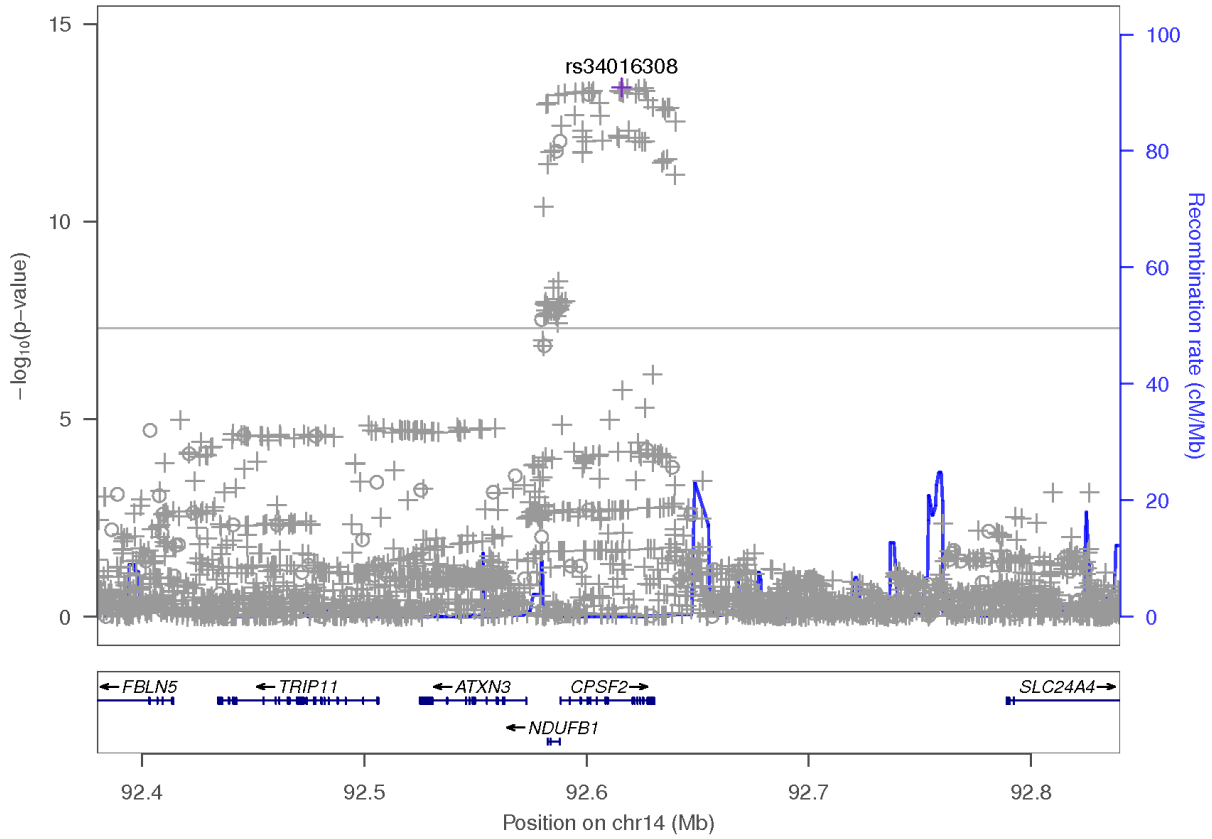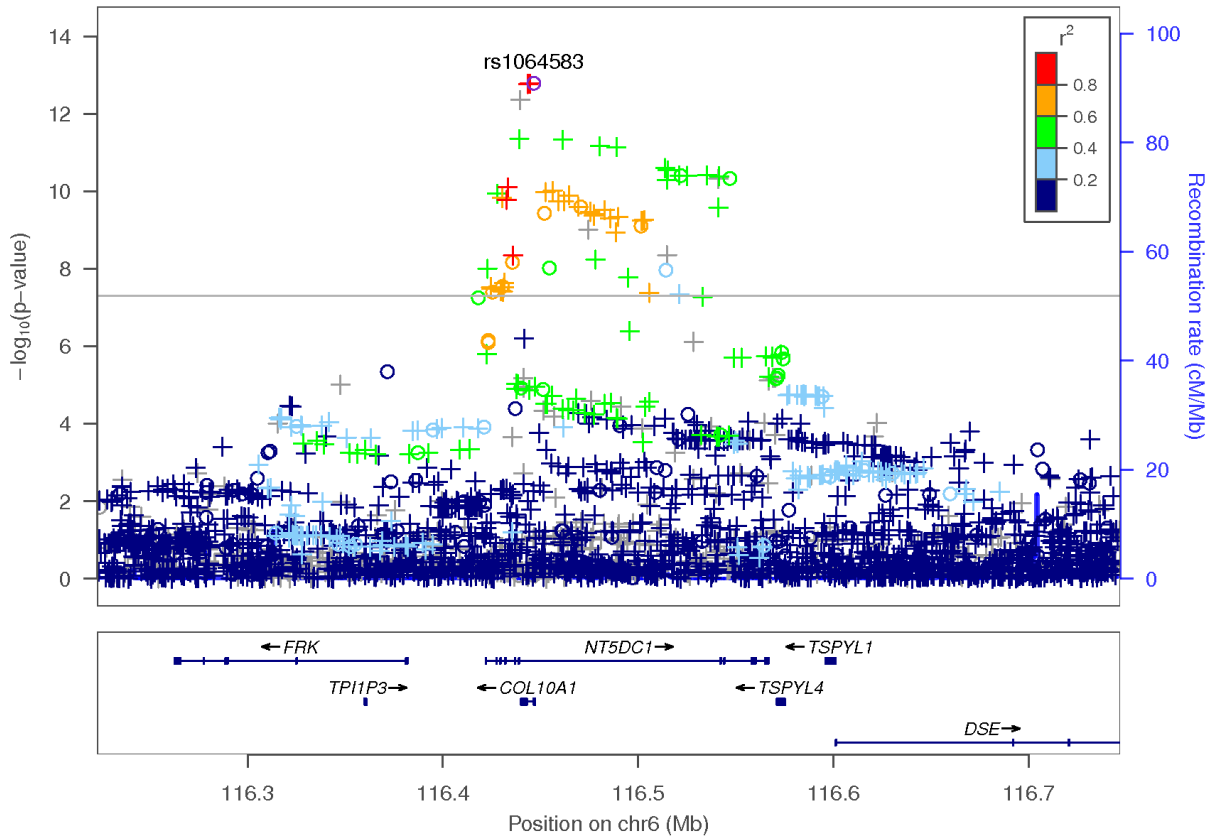

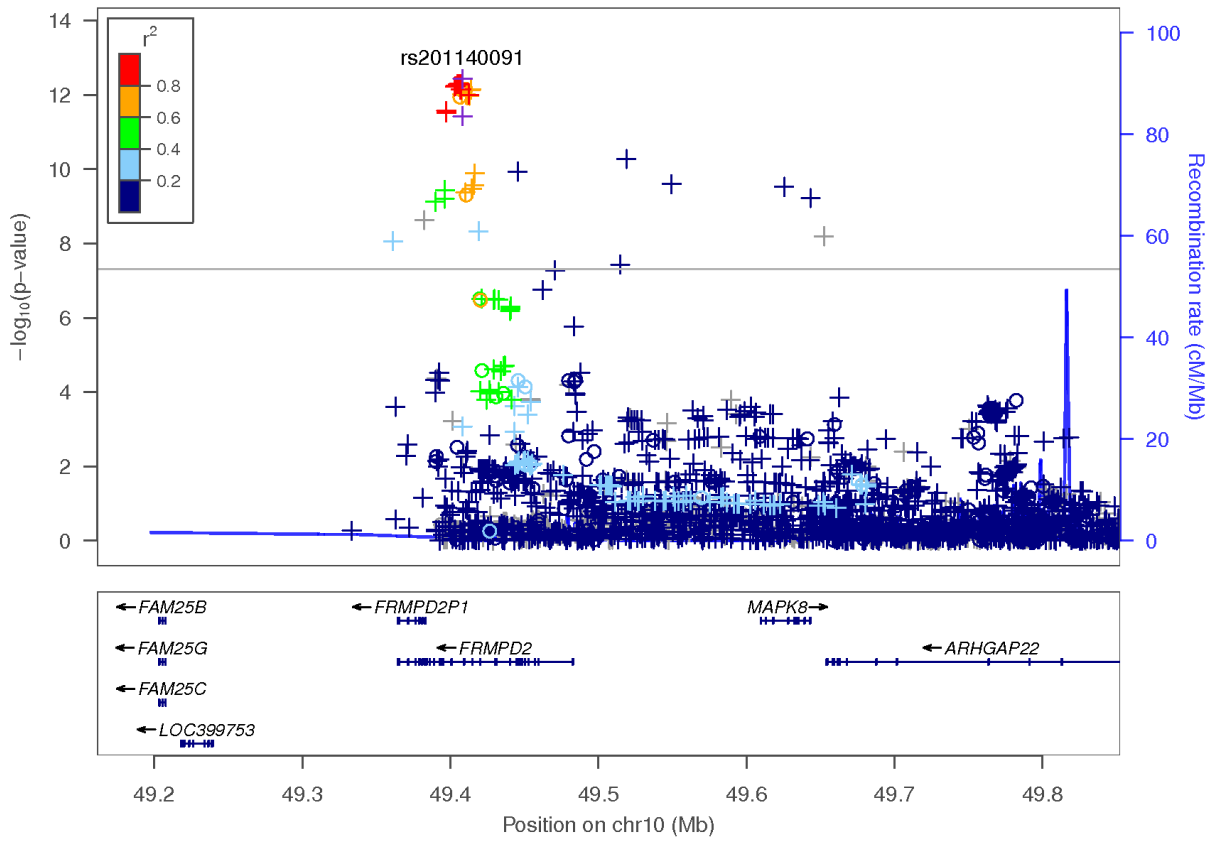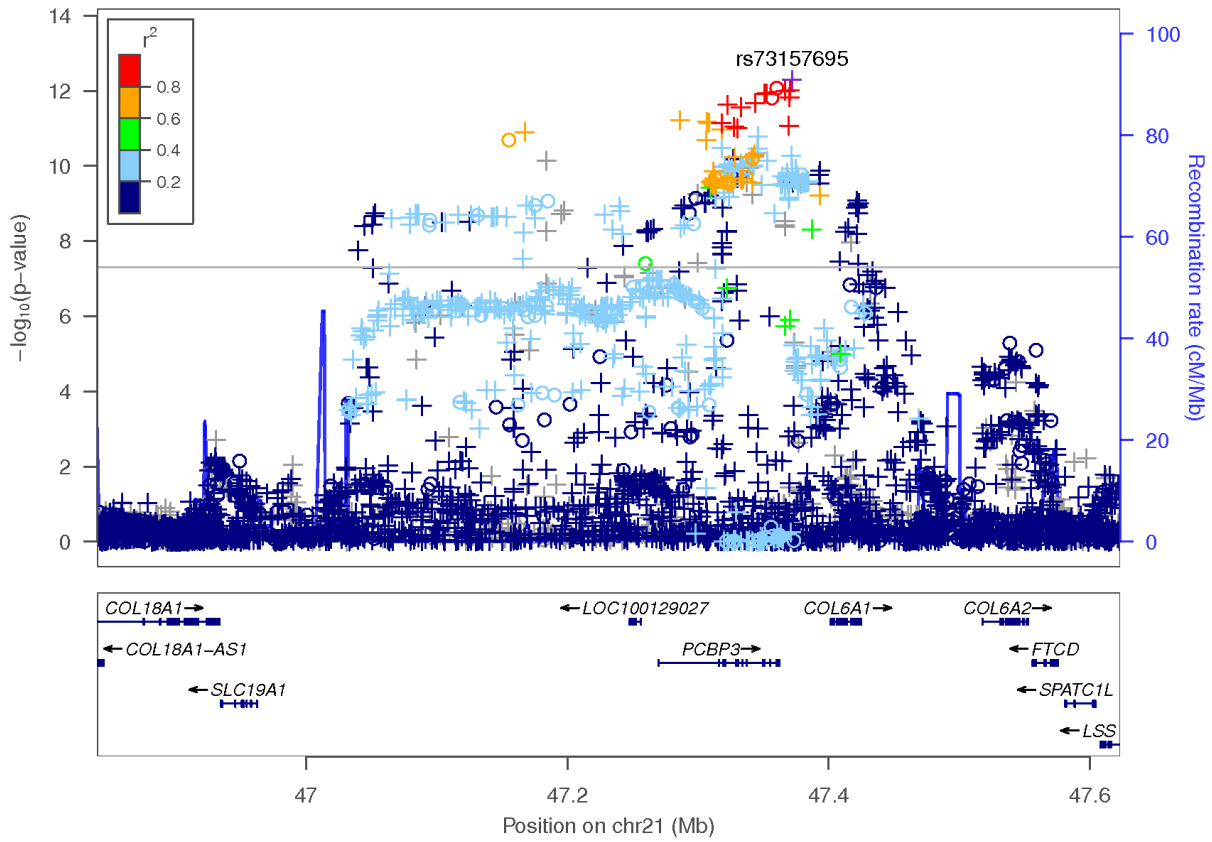

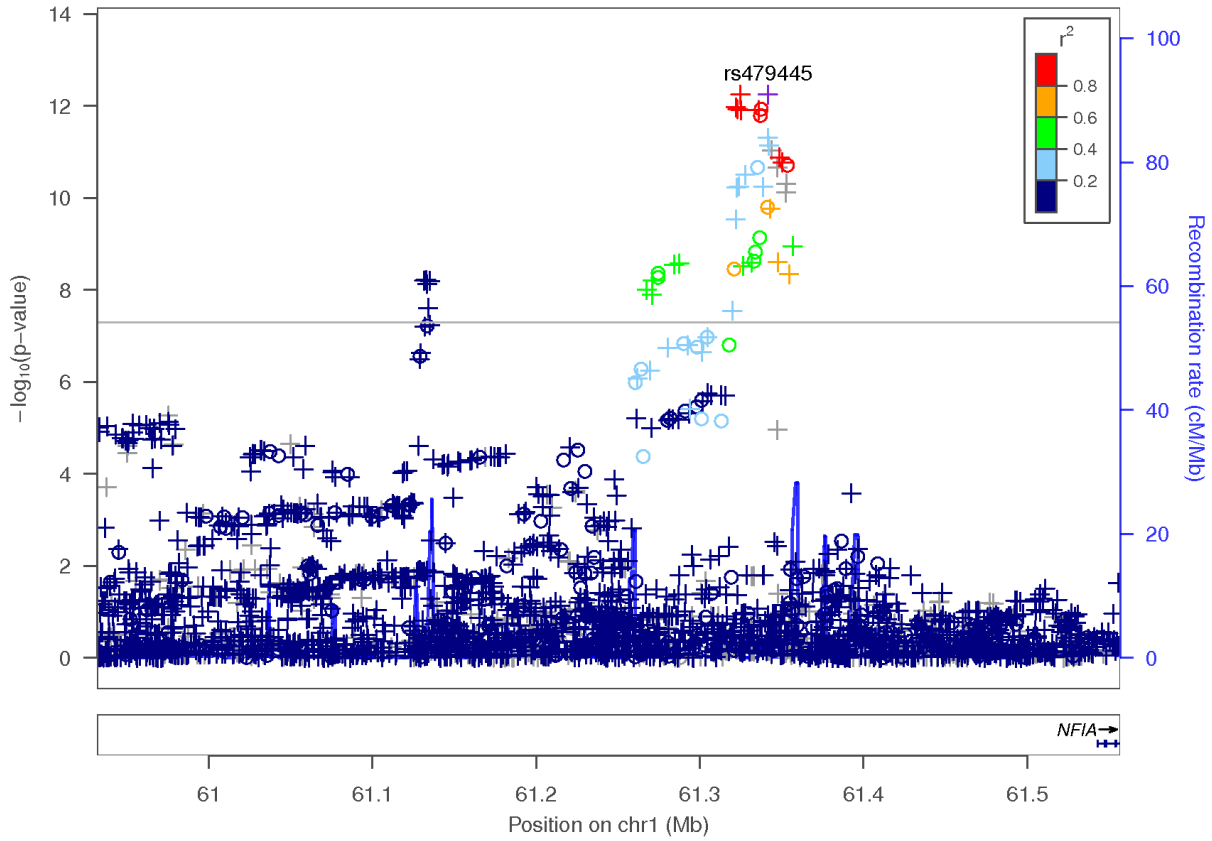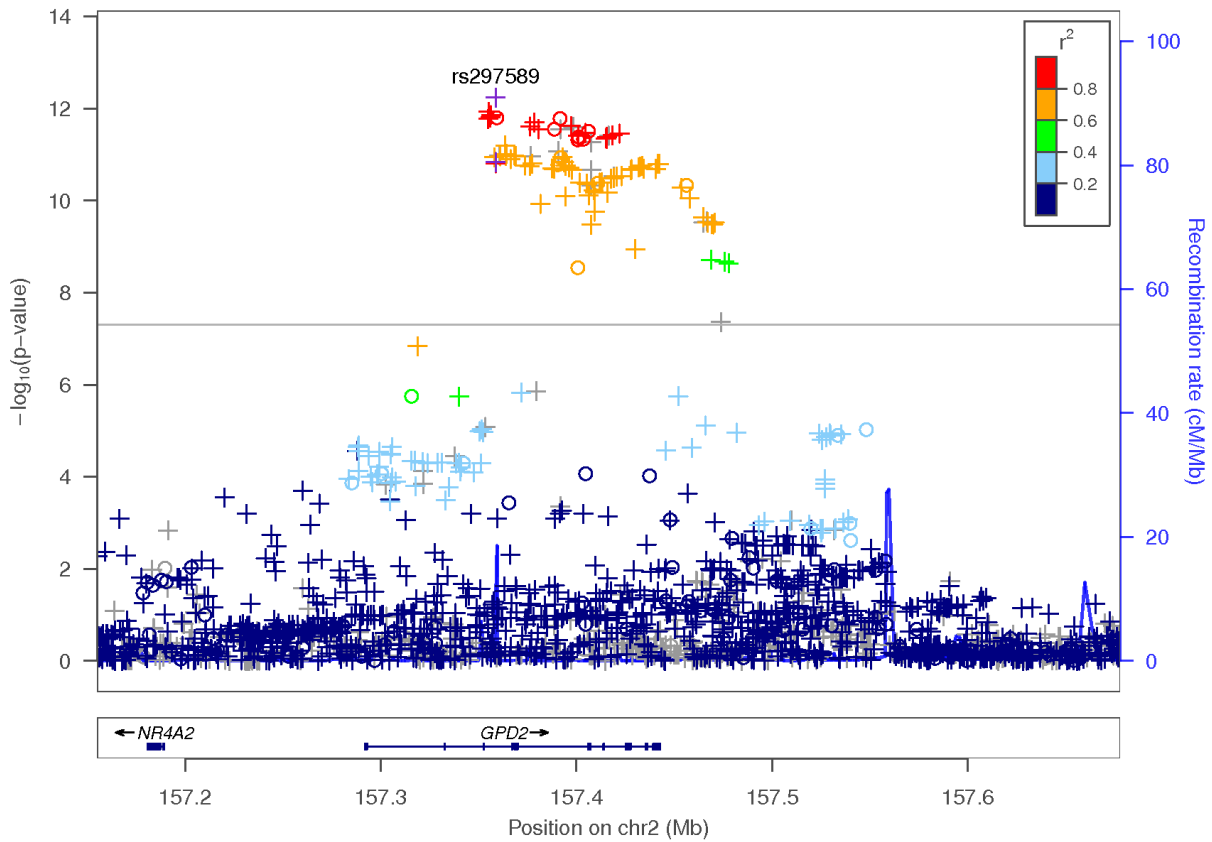

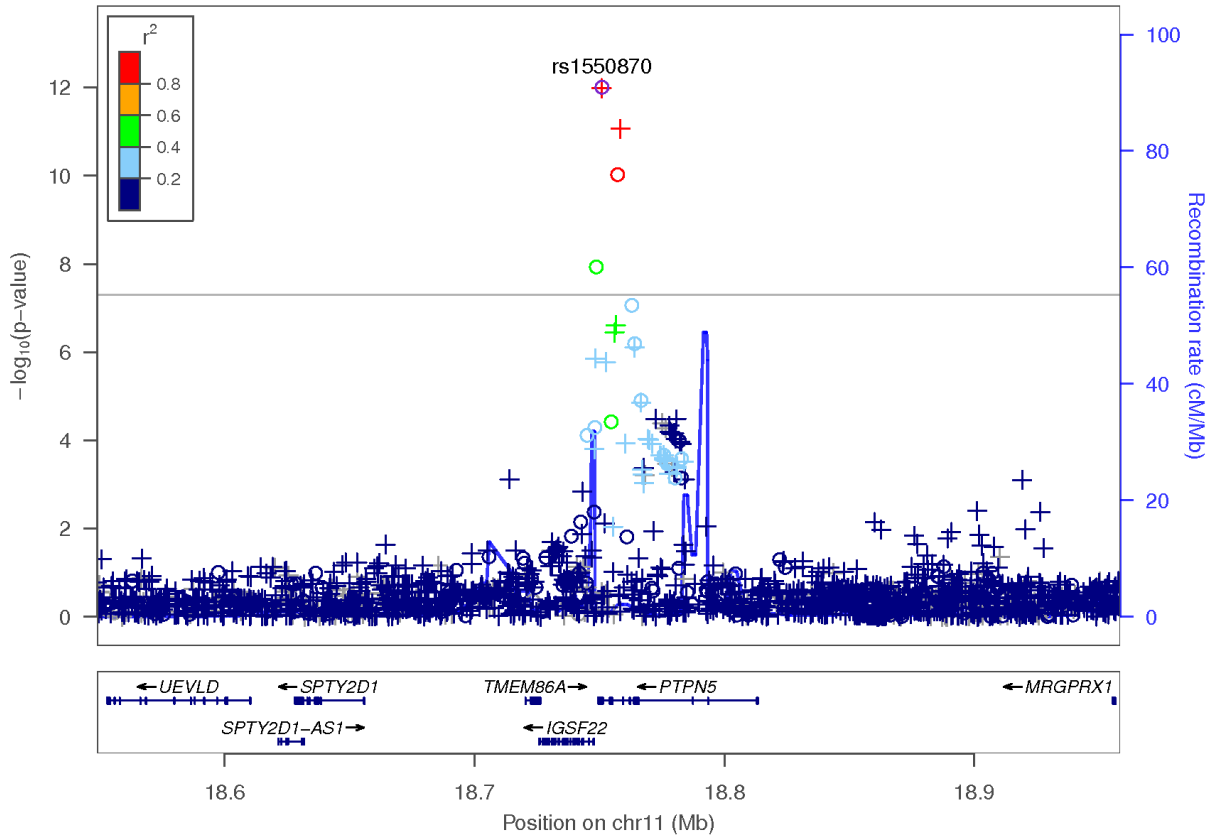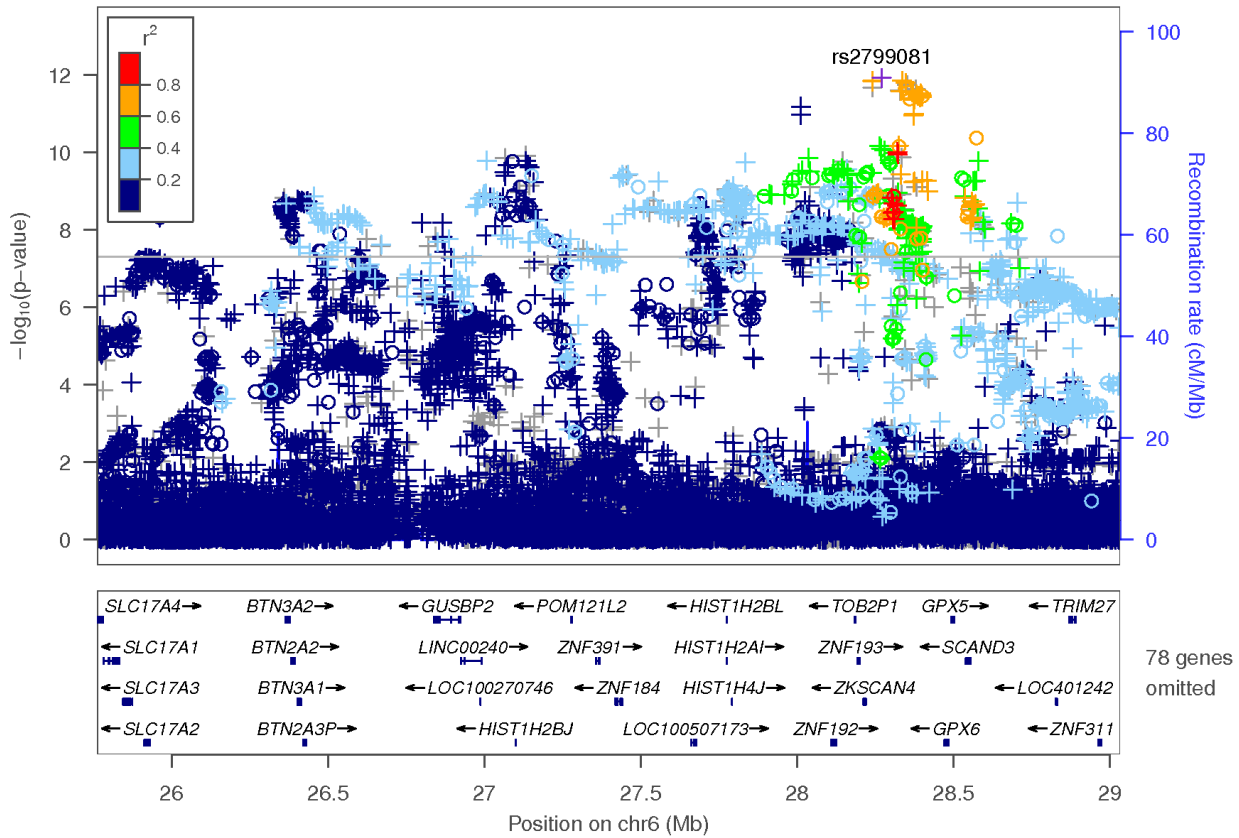

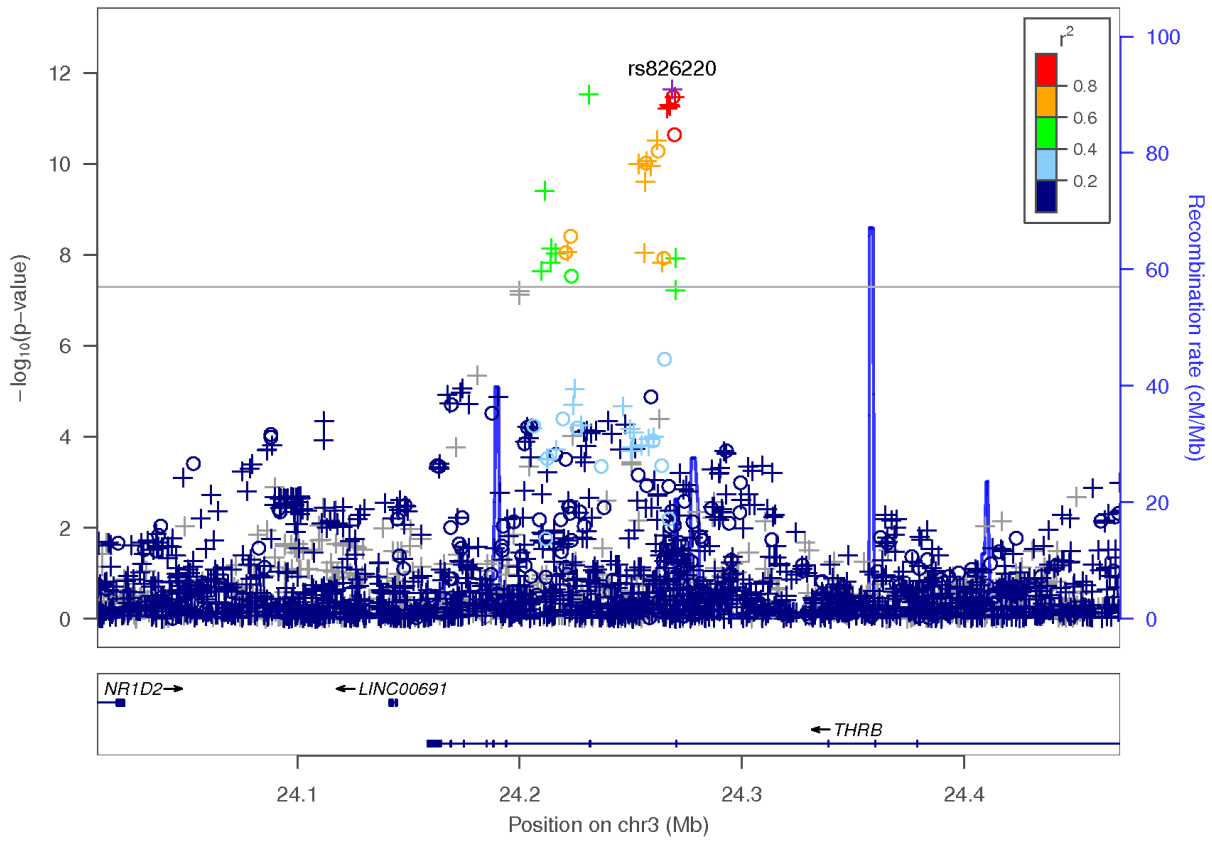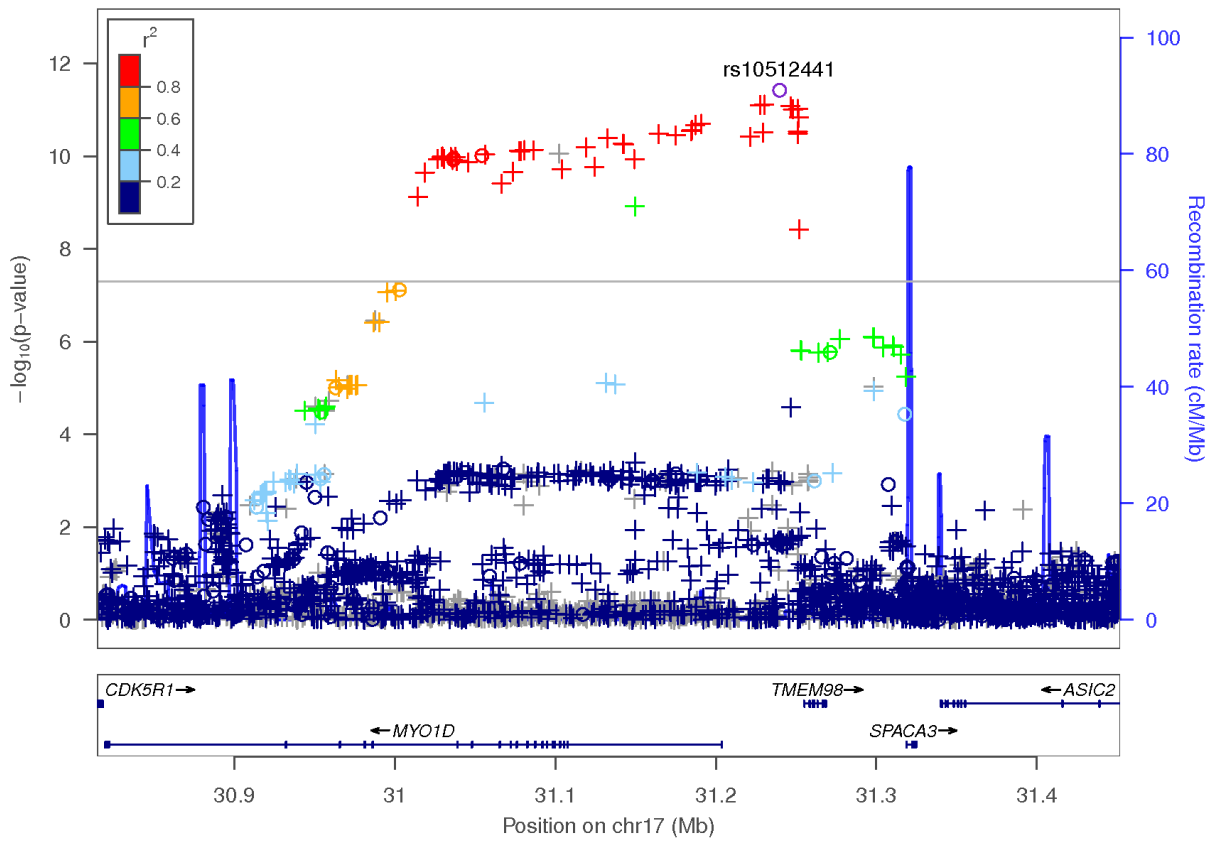

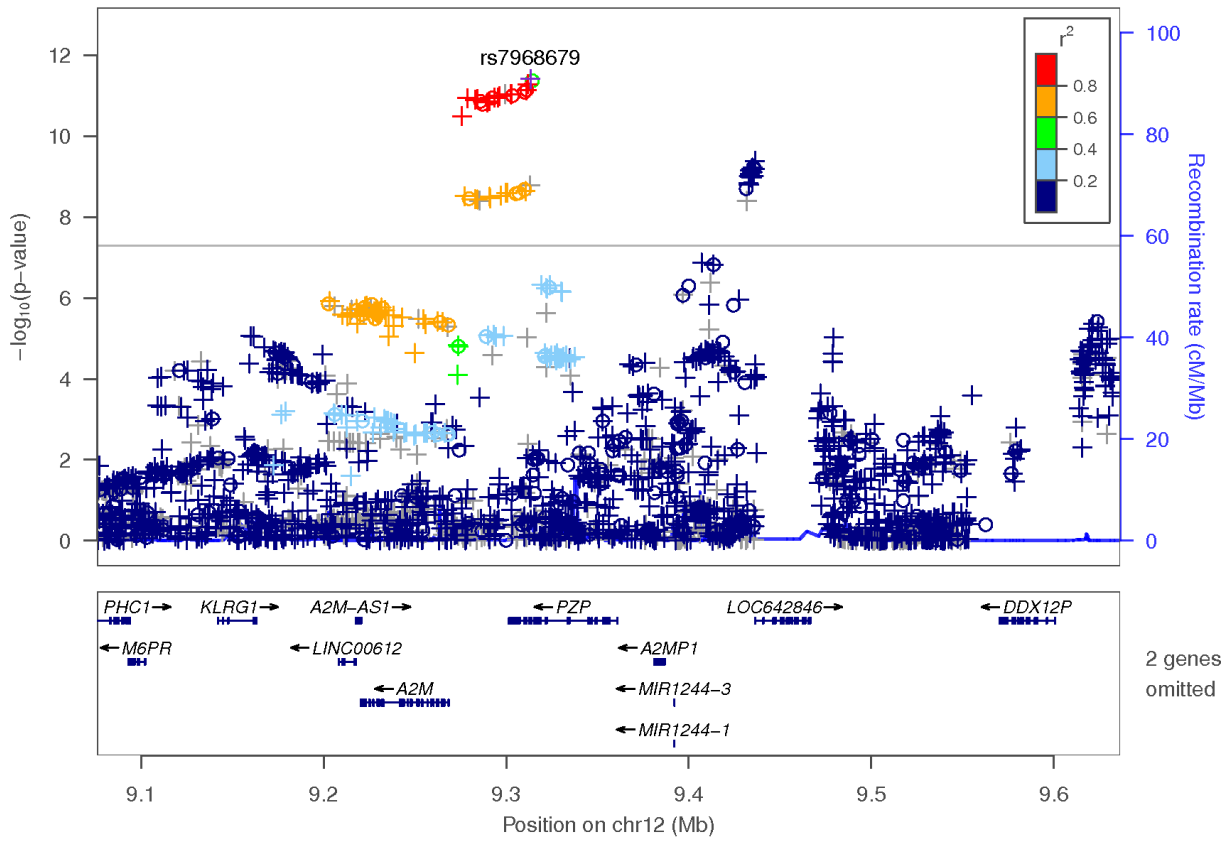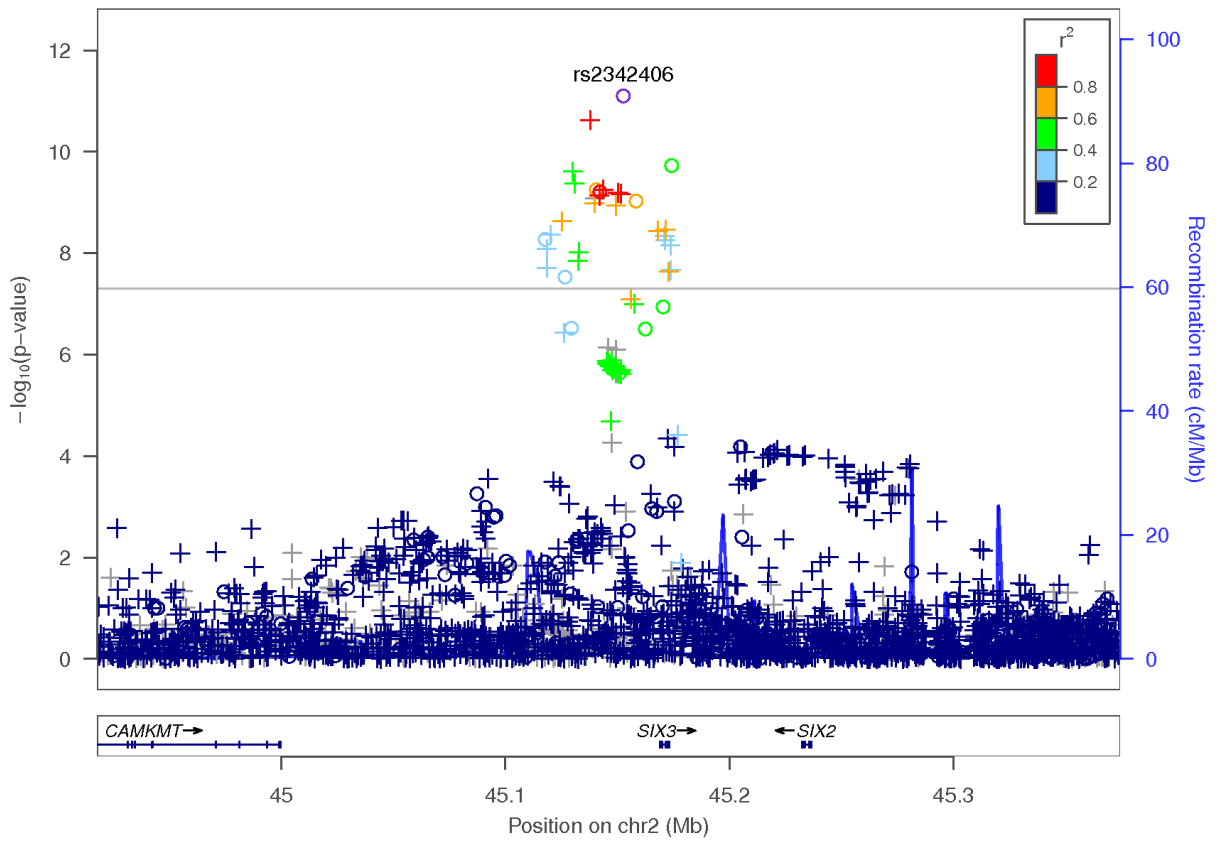

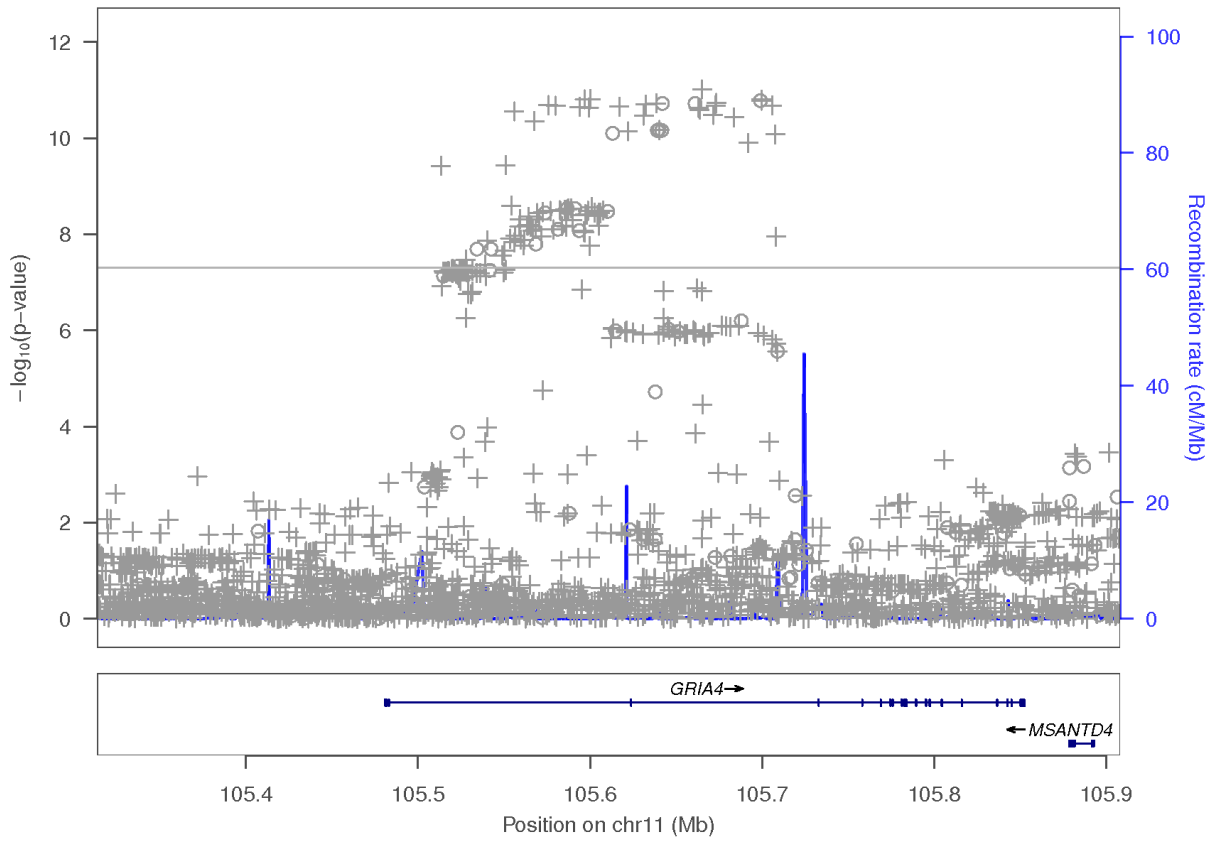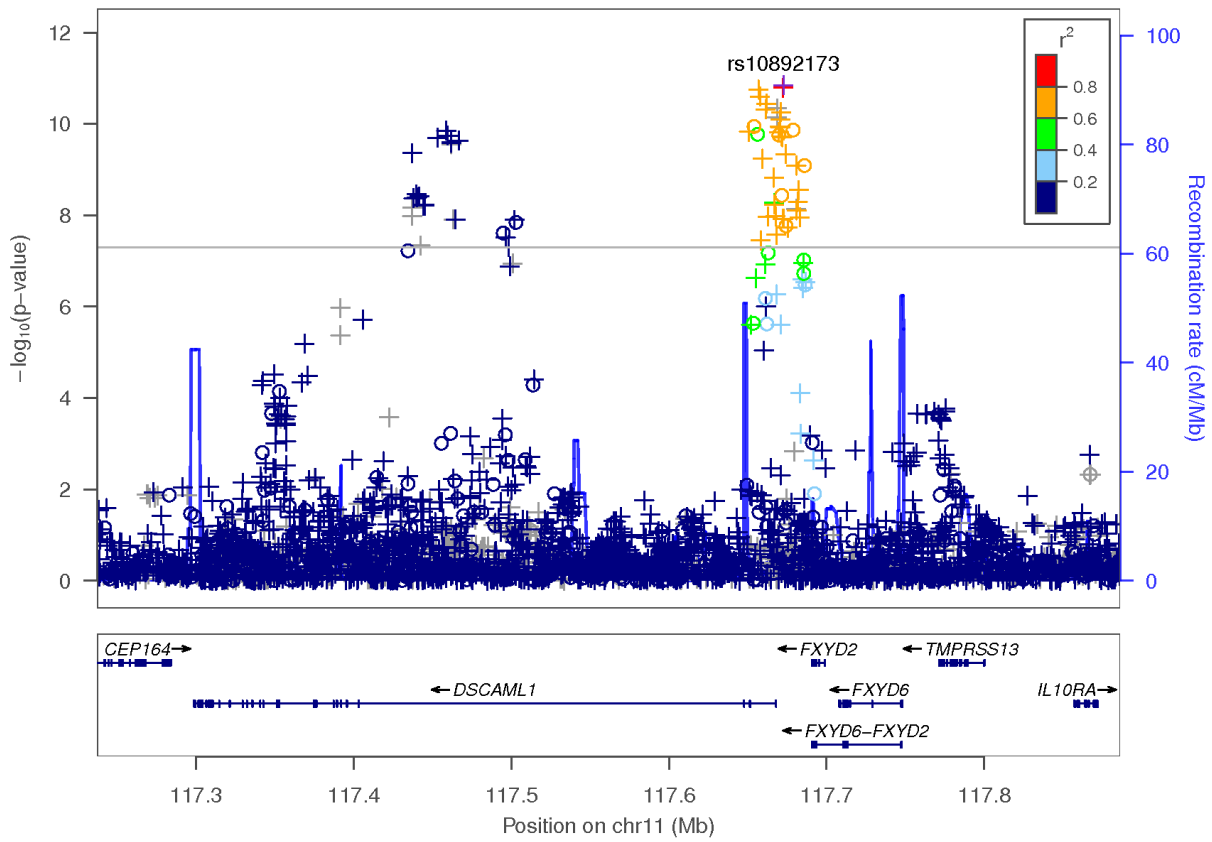



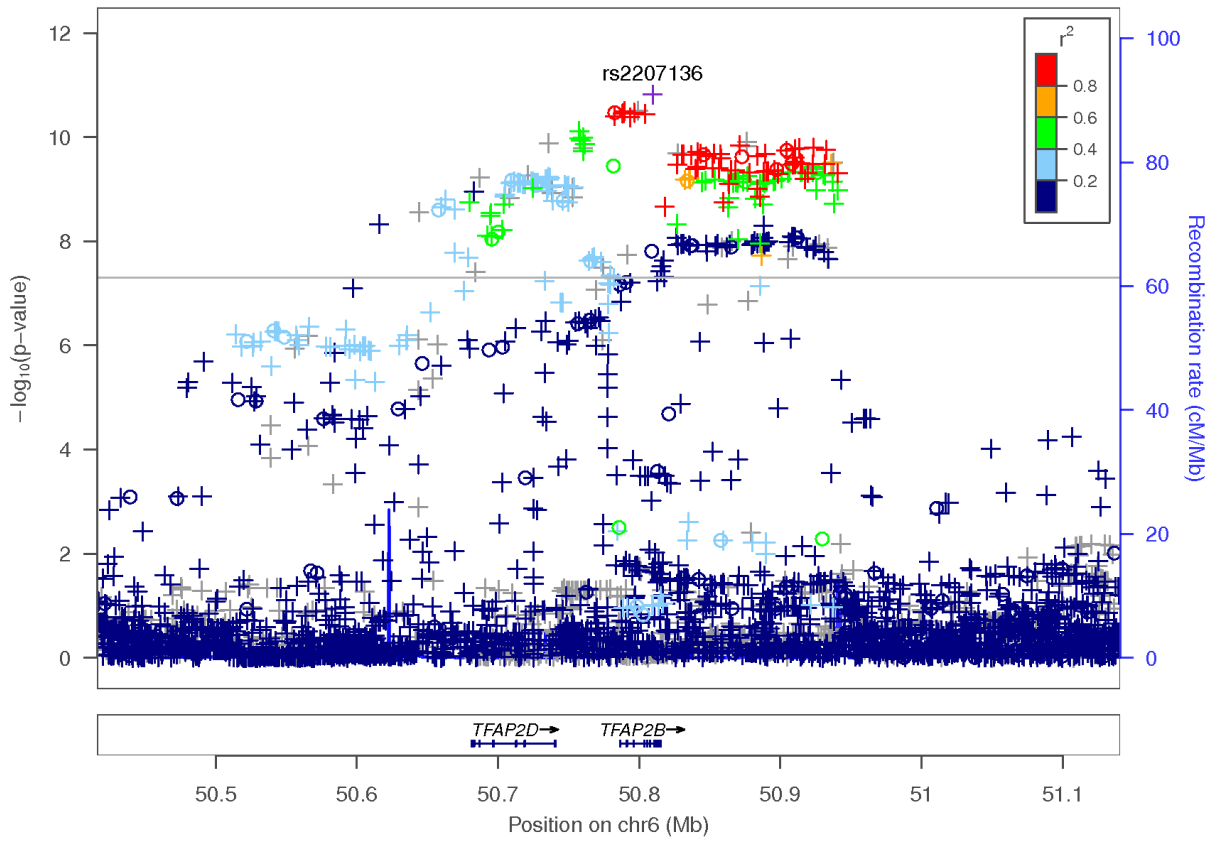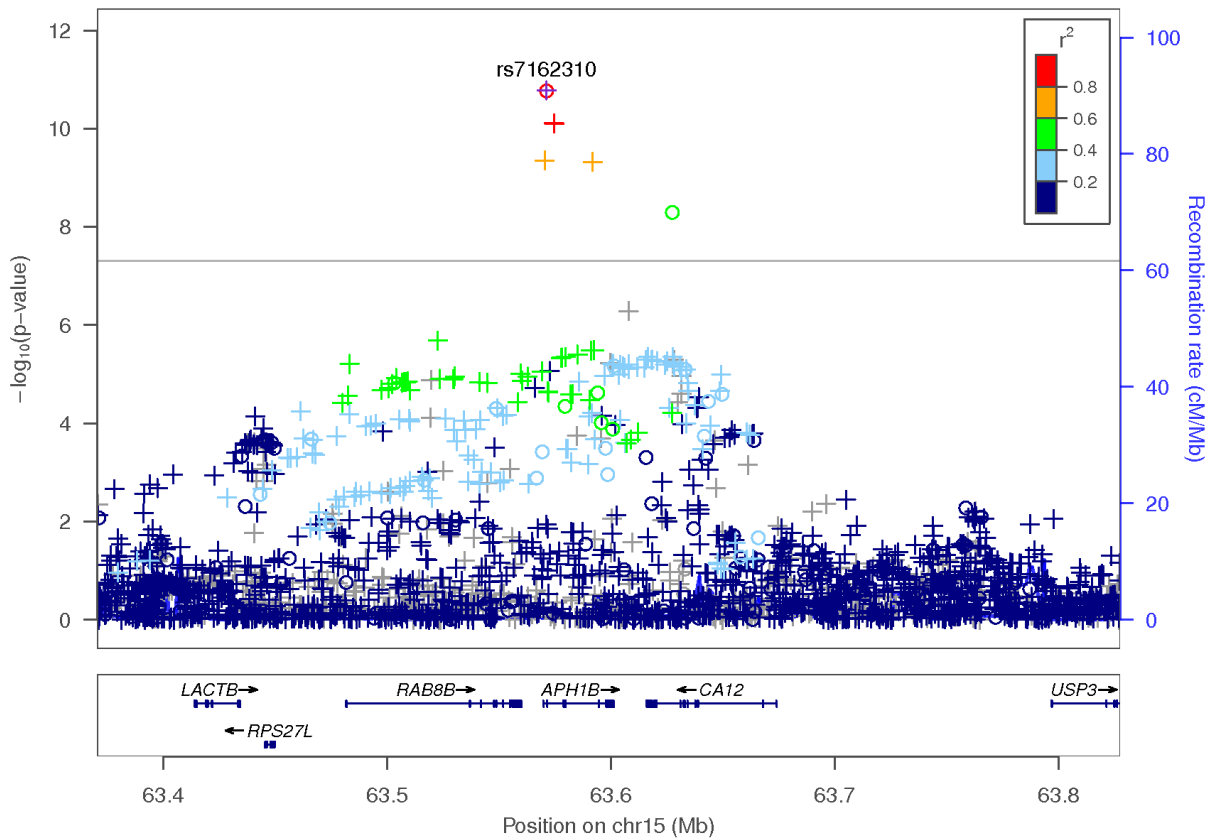

Supplement: NIHMS780506-supplement-13.pdf [file NIHMS780506-supplement-13.pdf]
