# Supplementary material
Source: PubMed Central journal article supplement (PMC5207801)

# Analysis Summary: Photic Sneeze

## Phenotype Description

Photic sneeze cases were defined as saying "Yes" to at least one of the following questions:

- Ten Things About You ("Do you have a tendency to sneeze when exposed to bright sunlight?")
- Research Snippets ("Do you have a tendency to sneeze when exposed to bright sunlight?")

Controls were defined as saying "No" to either question above. Respondents who answered "Yes" to one question and "No" to the other were excluded.

## Phenotype Statistics

The following table shows demographics of unrelated, European individuals included in the GWAS.

| Phenotype     | Group   | Total | M     | F     | (0,30] | (30,45] | (45,60] | (60,Inf] |
|---------------|---------|-------|-------|-------|--------|---------|---------|----------|
| photic_sneeze | case    | 32446 | 16338 | 16108 | 4434   | 9839    | 9102    | 9071     |
|               | control | 67249 | 33645 | 33604 | 7609   | 17784   | 18358   | 23498    |

The following table shows the phenotypic distribution across 23andMe genotyping platforms for individuals included in the GWAS.

| Phenotype     | Group   | Total | v1/v2 | v3    | v4   |
|---------------|---------|-------|-------|-------|------|
| photic_sneeze | case    | 32446 | 3696  | 24731 | 4019 |
|               | control | 67249 | 7467  | 51201 | 8581 |

## Null Model with Covariates

The following table shows results of fitting a model for the trait based on just the covariates. Principal coordinates have been standardized, so these effect sizes are in units of standard deviations.

|      | Estimate | Std. Error | z value | Pr(> z )               | LRT   | Pr(>Chi)               |
|------|----------|------------|---------|------------------------|-------|------------------------|
| age  | -0.01057 | 0.000431   | -24.5   | $8.2 \times 10^{-133}$ | 606.0 | $8.4 \times 10^{-134}$ |
| sexF | -0.00660 | 0.013611   | -0.5    | 0.63                   | 0.2   | 0.63                   |
| pc.0 | 0.08782  | 0.007203   | 12.2    | $3.4 \times 10^{-34}$  | 154.7 | $1.6 \times 10^{-35}$  |
| pc.1 | -0.06116 | 0.006979   | -8.8    | $1.9 \times 10^{-18}$  | 78.3  | $8.8 \times 10^{-19}$  |
| pc.2 | -0.02523 | 0.007021   | -3.6    | 0.00033                | 13.0  | 0.00032                |
| pc.3 | 0.03191  | 0.006801   | 4.7     | $2.7 \times 10^{-6}$   | 22.0  | $2.7 \times 10^{-6}$   |
| pc.4 | 0.00812  | 0.006777   | 1.2     | 0.23                   | 1.4   | 0.23                   |

## SNP-level QC information

The following table shows results for QC filters on the genotyped data:

|                         | failed | passed  |
|-------------------------|--------|---------|
| no filters              | 0      | 1030430 |
| not V1-only, chrM, chrY | 4790   | 1025640 |
| parent-offspring test   | 2129   | 1023511 |
| MAF > 0%                | 3203   | 1020494 |
| HWE > 1e-20             | 48225  | 972832  |
| gt.rate > 90%           | 30775  | 952826  |
| batch effects           | 28267  | 945446  |

The following table shows results for QC filters on the imputed dosage data:

|            | failed | passed   |
|------------|--------|----------|
| no filters | 0      | 13733809 |
| MAF > 0%   | 0      | 13733809 |

|                    |      |          |
|--------------------|------|----------|
| imputation quality | 0    | 13733809 |
| batch effects      | 2168 | 13731641 |

The following table shows results for QC filters on the merged association test results:

|                    | passed   | total    |
|--------------------|----------|----------|
| imputed only       | 12833621 | 12833621 |
| both passed        | 898002   | 13731623 |
| genotyped only     | 47444    | 13779067 |
| no test result     | -10843   | 13768224 |
| failed to converge | -38367   | 13729857 |

## Genetic Association Tests

We performed logistic regression assuming an additive model for allelic effects, using the model:

$$photic\_sneeze \sim age + sex + pc.0 + pc.1 + pc.2 + pc.3 + pc.4 + genotype$$

This genome-wide association analysis includes data from 32446 cases and 67249 controls of European ancestry, filtered to remove close relatives.

The results in this report have been adjusted for a genomic control inflation factor  $\lambda=1.118$ . The equivalent inflation factor for 1000 cases and 1000 controls  $\lambda_{1000}= 1.003$  , and for 10000,  $\lambda_{10000}= 1.027$  .

## Manhattan Plot

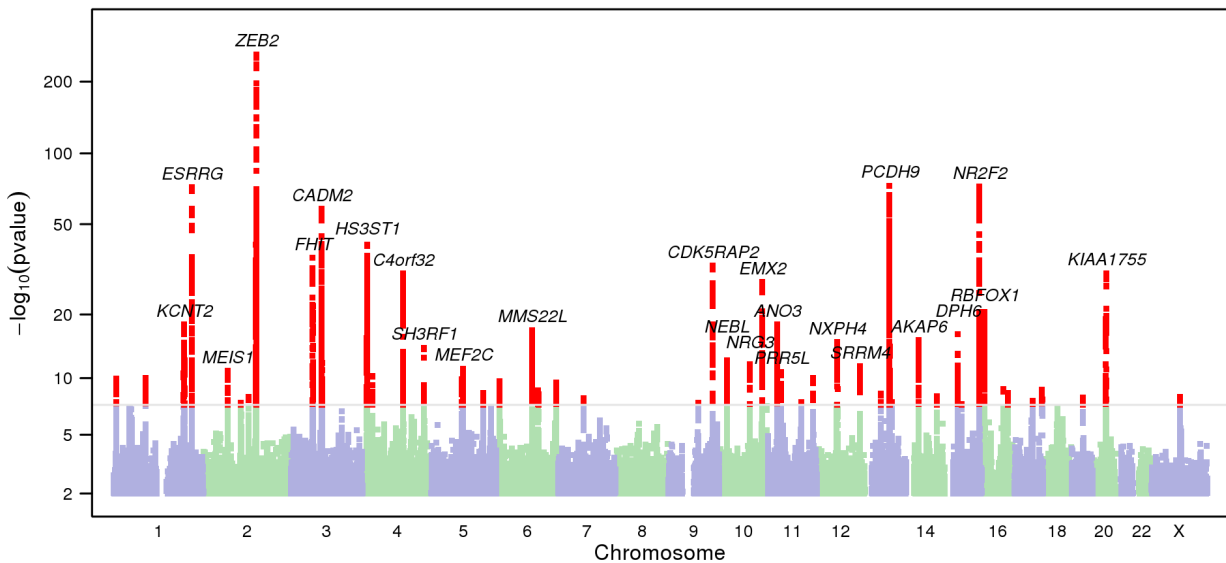

## Q-Q Plot of GWAS Results

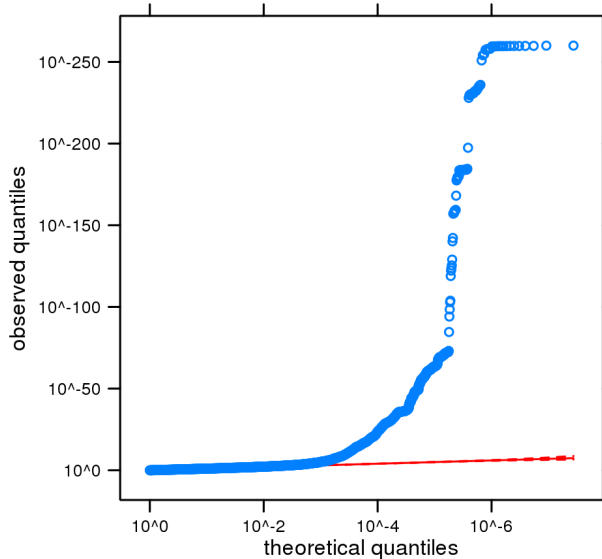

## Index SNPs for Strongest Associations

| cytoband | assay.name  | scaffold | position  | alleles | src | pvalue                 | OR    | 95% CI        | gene.context          |
|----------|-------------|----------|-----------|---------|-----|------------------------|-------|---------------|-----------------------|
| 2q22.3   | rs1533426   | chr2     | 146119018 | A/G     | I   | $1.0 \times 10^{-260}$ | 0.703 | [0.689,0.717] | ZEB2---[]             |
| 13q21.32 | rs9571757   | chr13    | 67905237  | A/C     | I   | $8.6 \times 10^{-74}$  | 1.206 | [1.182,1.231] | PCDH9---[]            |
| 15q26.2  | rs1541995   | chr15    | 96316457  | A/C     | I   | $3.5 \times 10^{-73}$  | 1.226 | [1.199,1.253] | []---NR2F2            |
| 1q41     | rs12755398  | chr1     | 217117146 | A/G     | I   | $1.0 \times 10^{-72}$  | 0.773 | [0.751,0.795] | ESRRG---[]---GPATCH2  |
| 3p12.1   | rs1146751   | chr3     | 84889597  | C/T     | I   | $8.6 \times 10^{-59}$  | 1.179 | [1.155,1.202] | []---CADM2            |
| 4p15.33  | rs9991510   | chr4     | 12080930  | C/T     | I   | $1.9 \times 10^{-41}$  | 1.150 | [1.127,1.174] | HS3ST1---[]           |
| 3p14.2   | rs633798    | chr3     | 59861871  | C/T     | I   | $2.0 \times 10^{-36}$  | 1.147 | [1.123,1.172] | [FHIT]                |
| 9q33.2   | rs887807    | chr9     | 123050797 | C/T     | I   | $8.3 \times 10^{-34}$  | 1.326 | [1.266,1.389] | DBC1---[]---CDK5RAP2  |
| 20q11.23 | rs4811602   | chr20    | 36849088  | A/G     | I   | $2.5 \times 10^{-31}$  | 0.886 | [0.868,0.904] | [KIAA1755]            |
| 4q25     | rs1376216   | chr4     | 112659154 | A/G     | I   | $3.4 \times 10^{-31}$  | 1.130 | [1.107,1.153] | []---C4orf32          |
| 10q26.11 | rs10886094  | chr10    | 119283708 | A/C     | I   | $1.1 \times 10^{-28}$  | 1.134 | [1.109,1.159] | PDZD8---[]---EMX2     |
| 16p13.3  | rs368977885 | chr16    | 7090929   | D/I     | I   | $2.6 \times 10^{-21}$  | 0.903 | [0.885,0.923] | []---RBFox1           |
| 1q31.3   | rs7534788   | chr1     | 195835131 | A/G     | I   | $9.8 \times 10^{-19}$  | 1.097 | [1.075,1.120] | []---KCNT2            |
| 11p14.3  | rs10642753  | chr11    | 26062101  | D/I     | I   | $1.1 \times 10^{-18}$  | 1.141 | [1.108,1.175] | LUZP2---[]---ANO3     |
| 6q16.1   | rs1338552   | chr6     | 98346633  | C/T     | I   | $1.0 \times 10^{-17}$  | 1.092 | [1.070,1.115] | [KIAA1755]---POU3F2   |
| 15q14    | rs144328717 | chr15    | 36126406  | D/I     | I   | $6.3 \times 10^{-17}$  | 0.905 | [0.884,0.926] | DPH6---[]---C15orf41  |
| 14q12    | rs11850550  | chr14    | 33137220  | C/G     | I   | $5.7 \times 10^{-16}$  | 0.919 | [0.900,0.938] | [AKAP6]               |
| 12q13.3  | rs55836402  | chr12    | 57612766  | D/I     | I   | $1.2 \times 10^{-15}$  | 0.917 | [0.898,0.937] | [NXPH4]               |
| 13q21.33 | rs74677756  | chr13    | 69606142  | C/T     | I   | $6.3 \times 10^{-15}$  | 1.089 | [1.066,1.113] | []---KLHL1            |
| 4q32.3   | rs17626617  | chr4     | 170013910 | C/T     | I   | $9.2 \times 10^{-15}$  | 1.112 | [1.083,1.143] | CBR4--[]-SH3RF1       |
| 10p12.31 | rs2148307   | chr10    | 21052620  | A/T     | I   | $5.6 \times 10^{-13}$  | 0.929 | [0.910,0.948] | PLXDC2---[]-NEBL      |
| 10q23.1  | rs11814950  | chr10    | 84722619  | A/G     | I   | $2.0 \times 10^{-12}$  | 0.860 | [0.825,0.897] | [NRG3]                |
| 12q24.23 | rs1568923   | chr12    | 119419603 | C/G     | I   | $3.4 \times 10^{-12}$  | 0.926 | [0.907,0.946] | [SRRM4]               |
| 5q14.3   | rs10067451  | chr5     | 87942506  | A/G     | I   | $7.3 \times 10^{-12}$  | 0.898 | [0.871,0.926] | TMEM161B---[]-MEF2C   |
| 2p14     | rs141078219 | chr2     | 66857453  | A/T     | I   | $1.3 \times 10^{-11}$  | 1.080 | [1.056,1.104] | MEIS1--[]---ETAA1     |
| 11p12    | rs35407642  | chr11    | 36473052  | A/G     | I   | $1.8 \times 10^{-11}$  | 0.932 | [0.913,0.951] | [PRR5L]               |
| 1q31.3   | rs61406265  | chr1     | 193936939 | C/T     | I   | $2.8 \times 10^{-11}$  | 0.916 | [0.893,0.940] | CDC73---[]            |
| 4p15.1   | rs7697398   | chr4     | 27813941  | A/G     | I   | $5.9 \times 10^{-11}$  | 1.091 | [1.063,1.120] | STIM2---[]            |
| 1p22.3   | rs12120466  | chr1     | 88173984  | G/T     | I   | $9.7 \times 10^{-11}$  | 0.855 | [0.816,0.896] | LMO4---[]---PKN2      |
| 11q24.2  | rs7107770   | chr11    | 125100438 | C/G     | I   | $1.0 \times 10^{-10}$  | 0.915 | [0.890,0.940] | [PKNOX2]              |
| 1p36.23  | rs10864302  | chr1     | 7487277   | C/T     | I   | $1.1 \times 10^{-10}$  | 0.916 | [0.892,0.941] | [CAMTA1]              |
| 5q14.3   | rs67177172  | chr5     | 84520674  | A/C     | I   | $1.4 \times 10^{-10}$  | 1.070 | [1.048,1.092] | EDIL3---[]            |
| 6p24.3   | rs1576263   | chr6     | 8690217   | G/T     | I   | $2.0 \times 10^{-10}$  | 0.937 | [0.919,0.956] | SLC35B3---[]          |
| 6q27     | rs9347032   | chr6     | 165157684 | C/T     | I   | $3.2 \times 10^{-10}$  | 1.069 | [1.047,1.091] | []---C6orf118         |
| 11p13    | rs1174117   | chr11    | 35686478  | A/G     | I   | $4.0 \times 10^{-10}$  | 0.934 | [0.914,0.954] | [TRIM44]              |
| 16q21    | rs3055140   | chr16    | 60371500  | D/I     | I   | $1.5 \times 10^{-9}$   | 0.933 | [0.912,0.954] | []                    |
| 17q25.3  | rs35570576  | chr17    | 77536946  | C/G     | I   | $1.7 \times 10^{-9}$   | 1.092 | [1.061,1.124] | RBFox3--[]---HP09025  |
| 6q22.1   | rs4620151   | chr6     | 115513803 | A/C     | I   | $2.2 \times 10^{-9}$   | 1.073 | [1.049,1.099] | []---FRK              |
| 5q31.3   | rs4349753   | chr5     | 144141555 | A/T     | I   | $4.0 \times 10^{-9}$   | 0.941 | [0.923,0.960] | KCTD16---[]---PRELID2 |
| 16q22.3  | rs7189864   | chr16    | 73633936  | C/G     | I   | $4.1 \times 10^{-9}$   | 1.069 | [1.046,1.094] | ZFH3---[]---PSMD7     |
| 13q14.11 | rs7319075   | chr13    | 44166996  | A/C     | I   | $4.3 \times 10^{-9}$   | 1.085 | [1.056,1.116] | [ENOX1]               |
| 14q31.2  | rs11852029  | chr14    | 83822726  | A/G     | I   | $7.8 \times 10^{-9}$   | 1.082 | [1.053,1.111] | []                    |
| 2q14.3   | rs13032103  | chr2     | 125985244 | G/T     | I   | $8.6 \times 10^{-9}$   | 1.067 | [1.044,1.091] | CNTNAP5---[]          |
| Xq21.1   | rs28417201  | chrX     | 79956549  | C/T     | I   | $9.1 \times 10^{-9}$   | 1.057 | [1.037,1.077] | [BRWD3]               |

|         |                   |       |           |     |   |                      |       |               |                              |
|---------|-------------------|-------|-----------|-----|---|----------------------|-------|---------------|------------------------------|
| 19q12   | rs36061463        | chr19 | 31979737  | D/I | I | 1.1×10 <sup>-8</sup> | 0.941 | [0.921,0.961] | TSHZ3---[ ]---THEG5          |
| 7q11.22 | rs10234796        | chr7  | 70012519  | A/G | I | 1.2×10 <sup>-8</sup> | 0.941 | [0.921,0.961] | [AUTS2]                      |
| 17q22   | rs117147772       | chr17 | 52061466  | A/G | I | 2.3×10 <sup>-8</sup> | 1.137 | [1.087,1.190] | KIF2B---[ ]---TOM1L1         |
| 13q22.1 | rs9318213         | chr13 | 74337218  | C/T | I | 2.6×10 <sup>-8</sup> | 1.059 | [1.038,1.081] | [KLF12]                      |
| 11q14.3 | 11:92232901:G_GTA | chr11 | 92232901  | D/I | I | 2.8×10 <sup>-8</sup> | 0.942 | [0.923,0.962] | [FAT3]                       |
| 2q12.1  | rs266053          | chr2  | 104090213 | C/T | I | 3.1×10 <sup>-8</sup> | 1.060 | [1.039,1.083] | TMEM182---[ ]---LOC100287010 |

## Quality Statistics for Index SNPs

| assay.name        | is.v2 | is.v3 | is.v4 | gt.rate | hw.p.value            | p.date | freq.b | avg.rsqr | min.rsqr | p.batch               | dose.b | qc.mask |
|-------------------|-------|-------|-------|---------|-----------------------|--------|--------|----------|----------|-----------------------|--------|---------|
| rs1533426         | FALSE | FALSE | FALSE |         |                       |        |        | 0.9981   | 0.9976   | 0.51                  | 0.5450 | v2v3v4  |
| rs9571757         | FALSE | TRUE  | FALSE | 0.9996  | 0.31                  | 0.0079 | 0.5493 | 0.9824   | 0.9082   | 0.083                 | 0.5497 | v2v3v4  |
| rs1541995         | FALSE | FALSE | FALSE |         |                       |        |        | 0.9964   | 0.9947   | 0.058                 | 0.7049 | v2v3v4  |
| rs12755398        | FALSE | FALSE | FALSE |         |                       |        |        | 0.9826   | 0.9721   | 0.18                  | 0.8558 | v2v3v4  |
| rs1146751         | TRUE  | TRUE  | TRUE  | 0.9892  | 5.8×10 <sup>-8</sup>  | 0.0084 | 0.5112 | 1.0000   | 0.9998   | 0.46                  | 0.5113 | v2v3v4  |
| rs9991510         | FALSE | FALSE | FALSE |         |                       |        |        | 0.9625   | 0.9423   | 0.12                  | 0.4739 | v2v3v4  |
| rs633798          | FALSE | FALSE | FALSE |         |                       |        |        | 0.9457   | 0.9238   | 0.64                  | 0.6364 | v2v3v4  |
| rs887807          | TRUE  | TRUE  | TRUE  | 0.9999  | 0.010                 | 0.24   | 0.9454 | 0.9993   | 0.9976   | 0.13                  | 0.9447 | v2v3v4  |
| rs4811602         | FALSE | FALSE | FALSE |         |                       |        |        | 0.9521   | 0.9276   | 0.081                 | 0.5389 | v2v3v4  |
| rs1376216         | FALSE | FALSE | FALSE |         |                       |        |        | 0.9871   | 0.9772   | 0.58                  | 0.6051 | v2v3v4  |
| rs10886094        | TRUE  | TRUE  | TRUE  | 0.9992  | 1.9×10 <sup>-23</sup> | 0.0074 | 0.7151 | 0.9979   | 0.9965   | 0.20                  | 0.7166 | v2v3v4  |
| rs368977885       | FALSE | FALSE | FALSE |         |                       |        |        | 0.9447   | 0.9201   | 0.069                 | 0.3945 | v2v3v4  |
| rs7534788         | FALSE | FALSE | FALSE |         |                       |        |        | 0.9789   | 0.8948   | 0.0089                | 0.3795 | v2v3v4  |
| rs10642753        | FALSE | FALSE | FALSE |         |                       |        |        | 0.9857   | 0.9810   | 0.44                  | 0.8586 | v2v3v4  |
| rs1338552         | FALSE | FALSE | FALSE |         |                       |        |        | 0.9673   | 0.9427   | 0.018                 | 0.5159 | v2v3v4  |
| rs144328717       | FALSE | FALSE | FALSE |         |                       |        |        | 0.9525   | 0.8615   | 0.23                  | 0.7576 | v2v3v4  |
| rs11850550        | FALSE | FALSE | FALSE |         |                       |        |        | 0.9418   | 0.9370   | 0.15                  | 0.5113 | v2v3v4  |
| rs55836402        | FALSE | FALSE | FALSE |         |                       |        |        | 0.9756   | 0.9680   | 0.77                  | 0.3552 | v2v3v4  |
| rs74677756        | FALSE | FALSE | FALSE |         |                       |        |        | 0.9821   | 0.9793   | 0.44                  | 0.6614 | v2v3v4  |
| rs17626617        | TRUE  | TRUE  | TRUE  | 0.9990  | 0.00051               | 0.11   | 0.8375 | 0.9998   | 0.9990   | 0.62                  | 0.8389 | v2v3v4  |
| rs2148307         | FALSE | FALSE | FALSE |         |                       |        |        | 0.9984   | 0.9924   | 0.31                  | 0.4393 | v2v3v4  |
| rs11814950        | FALSE | FALSE | FALSE |         |                       |        |        | 0.9941   | 0.9862   | 0.21                  | 0.0614 | v2v3v4  |
| rs1568923         | FALSE | FALSE | FALSE |         |                       |        |        | 0.8869   | 0.8486   | 0.31                  | 0.6135 | v2v3v4  |
| rs10067451        | FALSE | FALSE | FALSE |         |                       |        |        | 0.9596   | 0.9479   | 3.2×10 <sup>-10</sup> | 0.8710 | v2v3v4  |
| rs141078219       | FALSE | FALSE | FALSE |         |                       |        |        | 0.8764   | 0.8549   | 0.28                  | 0.6383 | v2v3v4  |
| rs35407642        | FALSE | FALSE | FALSE |         |                       |        |        | 0.9945   | 0.9914   | 0.58                  | 0.3880 | v2v3v4  |
| rs61406265        | FALSE | FALSE | FALSE |         |                       |        |        | 0.9568   | 0.9010   | 0.12                  | 0.8100 | v2v3v4  |
| rs7697398         | FALSE | FALSE | FALSE |         |                       |        |        | 0.9869   | 0.9719   | 0.24                  | 0.1757 | v2v3v4  |
| rs12120466        | FALSE | FALSE | FALSE |         |                       |        |        | 0.9975   | 0.9905   | 0.76                  | 0.9555 | v2v3v4  |
| rs7107770         | FALSE | FALSE | FALSE |         |                       |        |        | 0.9700   | 0.9523   | 0.38                  | 0.8365 | v2v3v4  |
| rs10864302        | FALSE | TRUE  | FALSE | 0.9997  | 2.6×10 <sup>-8</sup>  | 0.71   | 0.1720 | 0.9893   | 0.9530   | 0.00034               | 0.1733 | v2v3v4  |
| rs67177172        | FALSE | FALSE | FALSE |         |                       |        |        | 0.9730   | 0.9688   | 0.088                 | 0.3882 | v2v3v4  |
| rs1576263         | FALSE | TRUE  | FALSE | 0.8209  | 0.0                   | 0.0    | 0.4305 | 0.9935   | 0.9779   | 0.91                  | 0.5192 | v2v3v4  |
| rs9347032         | FALSE | FALSE | FALSE |         |                       |        |        | 0.9376   | 0.9266   | 0.65                  | 0.4363 | v2v3v4  |
| rs1174117         | FALSE | FALSE | FALSE |         |                       |        |        | 0.9445   | 0.8810   | 8.5×10 <sup>-6</sup>  | 0.3636 | v2v3v4  |
| rs3055140         | FALSE | FALSE | FALSE |         |                       |        |        | 0.9814   | 0.9726   | 0.031                 | 0.7291 | v2v3v4  |
| rs35570576        | FALSE | FALSE | FALSE |         |                       |        |        | 0.8892   | 0.8233   | 1.0×10 <sup>-21</sup> | 0.1868 | v3v4    |
| rs4620151         | FALSE | FALSE | FALSE |         |                       |        |        | 0.7964   | 0.7407   | 0.00016               | 0.6451 | v2v3v4  |
| rs4349753         | FALSE | FALSE | FALSE |         |                       |        |        | 0.9806   | 0.9757   | 0.16                  | 0.5422 | v2v3v4  |
| rs7189864         | FALSE | FALSE | FALSE |         |                       |        |        | 0.9454   | 0.9172   | 0.14                  | 0.6929 | v2v3v4  |
| rs7319075         | FALSE | FALSE | FALSE |         |                       |        |        | 0.9999   | 0.9994   | 0.0014                | 0.8341 | v2v3v4  |
| rs11852029        | TRUE  | TRUE  | TRUE  | 0.9969  | 0.0020                | 0.67   | 0.1627 | 0.9999   | 0.9995   | 0.57                  | 0.1622 | v2v3v4  |
| rs13032103        | FALSE | FALSE | FALSE |         |                       |        |        | 0.9602   | 0.9420   | 0.17                  | 0.6934 | v2v3v4  |
| rs28417201        | FALSE | FALSE | FALSE |         |                       |        |        | 0.9882   | 0.9719   | 0.0091                | 0.2511 | v2v3v4  |
| rs36061463        | FALSE | FALSE | FALSE |         |                       |        |        | 0.9656   | 0.8708   | 3.4×10 <sup>-5</sup>  | 0.3750 | v2v3v4  |
| rs10234796        | FALSE | FALSE | FALSE |         |                       |        |        | 0.9875   | 0.9835   | 0.91                  | 0.6481 | v2v3v4  |
| rs117147772       | FALSE | FALSE | FALSE |         |                       |        |        | 0.9711   | 0.9621   | 0.21                  | 0.9463 | v2v3v4  |
| rs9318213         | FALSE | FALSE | FALSE |         |                       |        |        | 0.9881   | 0.9513   | 0.10                  | 0.5749 | v2v3v4  |
| 11:92232901:G_GTA | FALSE | FALSE | FALSE |         |                       |        |        | 0.9129   | 0.9002   | 0.068                 | 0.4507 | v2v3v4  |
| rs266053          | FALSE | FALSE | FALSE |         |                       |        |        | 0.9221   | 0.9118   | 0.33                  | 0.5372 | v2v3v4  |

## SNP Statistics in the GWAS Sample

| assay.name  | AA.0  | AB.0  | BB.0  | im.num.0 | dose.b.0 | AA.1 | AB.1  | BB.1  | im.num.1 | dose.b.1 |
|-------------|-------|-------|-------|----------|----------|------|-------|-------|----------|----------|
| rs1533426   |       |       |       | 67249    | 0.5683   |      |       |       | 32446    | 0.4795   |
| rs9571757   | 11173 | 25391 | 14614 | 67249    | 0.5333   | 4371 | 11970 | 8378  | 32446    | 0.5785   |
| rs1541995   |       |       |       | 67249    | 0.6890   |      |       |       | 32446    | 0.7296   |
| rs12755398  |       |       |       | 67249    | 0.8663   |      |       |       | 32446    | 0.8343   |
| rs1146751   | 16967 | 33074 | 16569 | 67249    | 0.4978   | 6901 | 15873 | 9338  | 32446    | 0.5383   |
| rs9991510   |       |       |       | 67249    | 0.4618   |      |       |       | 32446    | 0.4942   |
| rs633798    |       |       |       | 67249    | 0.6296   |      |       |       | 32446    | 0.6595   |
| rs887807    | 241   | 7334  | 59667 | 67249    | 0.9419   | 63   | 2756  | 29620 | 32446    | 0.9556   |
| rs4811602   |       |       |       | 67249    | 0.5474   |      |       |       | 32446    | 0.5179   |
| rs1376216   |       |       |       | 67249    | 0.5977   |      |       |       | 32446    | 0.6257   |
| rs10886094  | 6086  | 27309 | 33791 | 67249    | 0.7077   | 2418 | 12575 | 17417 | 32446    | 0.7326   |
| rs368977885 |       |       |       | 67249    | 0.3998   |      |       |       | 32446    | 0.3754   |
| rs7534788   |       |       |       | 67249    | 0.3719   |      |       |       | 32446    | 0.3928   |
| rs10642753  |       |       |       | 67249    | 0.8543   |      |       |       | 32446    | 0.8697   |
| rs1338552   |       |       |       | 67249    | 0.5089   |      |       |       | 32446    | 0.5298   |
| rs144328717 |       |       |       | 67249    | 0.7628   |      |       |       | 32446    | 0.7444   |

|                   |       |       |       |       |        |       |       |       |       |        |
|-------------------|-------|-------|-------|-------|--------|-------|-------|-------|-------|--------|
| rs11850550        |       |       |       | 67249 | 0.5195 |       |       |       | 32446 | 0.5007 |
| rs55836402        |       |       |       | 67249 | 0.3605 |       |       |       | 32446 | 0.3418 |
| rs74677756        |       |       |       | 67249 | 0.6579 |       |       |       | 32446 | 0.6782 |
| rs17626617        | 1991  | 18758 | 46452 | 67249 | 0.8308 | 884   | 8351  | 23193 | 32446 | 0.8440 |
| rs2148307         |       |       |       | 67249 | 0.4448 |       |       |       | 32446 | 0.4258 |
| rs11814950        |       |       |       | 67249 | 0.0642 |       |       |       | 32446 | 0.0564 |
| rs1568923         |       |       |       | 67249 | 0.6167 |       |       |       | 32446 | 0.6000 |
| rs10067451        |       |       |       | 67249 | 0.8783 |       |       |       | 32446 | 0.8696 |
| rs141078219       |       |       |       | 67249 | 0.6347 |       |       |       | 32446 | 0.6509 |
| rs35407642        |       |       |       | 67249 | 0.3923 |       |       |       | 32446 | 0.3757 |
| rs61406265        |       |       |       | 67249 | 0.8137 |       |       |       | 32446 | 0.8008 |
| rs7697398         |       |       |       | 67249 | 0.1730 |       |       |       | 32446 | 0.1858 |
| rs12120466        |       |       |       | 67249 | 0.9579 |       |       |       | 32446 | 0.9507 |
| rs7107770         |       |       |       | 67249 | 0.8400 |       |       |       | 32446 | 0.8280 |
| rs10864302        | 34871 | 14601 | 1721  | 67249 | 0.1772 | 17322 | 6712  | 688   | 32446 | 0.1654 |
| rs67177172        |       |       |       | 67249 | 0.3817 |       |       |       | 32446 | 0.3968 |
| rs1576263         | 10789 | 25688 | 5760  | 67249 | 0.5267 | 5534  | 12470 | 2706  | 32446 | 0.5115 |
| rs9347032         |       |       |       | 67249 | 0.4312 |       |       |       | 32446 | 0.4455 |
| rs1174117         |       |       |       | 67249 | 0.3656 |       |       |       | 32446 | 0.3497 |
| rs3055140         |       |       |       | 67249 | 0.7320 |       |       |       | 32446 | 0.7182 |
| rs35570576        |       |       |       | 59219 | 0.1814 |       |       |       | 28462 | 0.1916 |
| rs4620151         |       |       |       | 67249 | 0.6397 |       |       |       | 32446 | 0.6521 |
| rs4349753         |       |       |       | 67249 | 0.5423 |       |       |       | 32446 | 0.5255 |
| rs7189864         |       |       |       | 67249 | 0.6893 |       |       |       | 32446 | 0.7023 |
| rs7319075         |       |       |       | 67249 | 0.8349 |       |       |       | 32446 | 0.8478 |
| rs11852029        | 47385 | 17964 | 1708  | 67249 | 0.1595 | 22284 | 9086  | 992   | 32446 | 0.1710 |
| rs13032103        |       |       |       | 67249 | 0.6903 |       |       |       | 32446 | 0.7036 |
| rs28417201        |       |       |       | 67249 | 0.2439 |       |       |       | 32446 | 0.2585 |
| rs36061463        |       |       |       | 67249 | 0.3792 |       |       |       | 32446 | 0.3630 |
| rs10234796        |       |       |       | 67249 | 0.6510 |       |       |       | 32446 | 0.6377 |
| rs117147772       |       |       |       | 67249 | 0.9441 |       |       |       | 32446 | 0.9496 |
| rs9318213         |       |       |       | 67249 | 0.5725 |       |       |       | 32446 | 0.5877 |
| 11:92232901:G_GTA |       |       |       | 67249 | 0.4539 |       |       |       | 32446 | 0.4395 |
| rs266053          |       |       |       | 67249 | 0.5358 |       |       |       | 32446 | 0.5505 |

## Annotations from NHGRI GWAS Catalog

The following table shows, for each index SNP, all entries in the NHGRI GWAS Catalog that are within 500kb and in at least moderate linkage disequilibrium ( $r^2 > 0.5$ ).

| region   | position  | our.name   | our.pval               | dist   | rsqr  | assay.name | pvalue                | pubmed.id | trait                                                                                     | genes      |
|----------|-----------|------------|------------------------|--------|-------|------------|-----------------------|-----------|-------------------------------------------------------------------------------------------|------------|
| 2q22.3   | 146119018 | rs1533426  | $1.0 \times 10^{-260}$ | 6505   | 0.989 | rs10427255 | $1.0 \times 10^{-11}$ | 20585627  | Common traits (Other)                                                                     | Intergenic |
| 9q33.2   | 123050797 | rs887807   | $8.3 \times 10^{-34}$  | 5840   | 0.975 | rs4837752  | $6.0 \times 10^{-6}$  | 19875103  | Response to antipsychotic therapy (extrapyramidal side effects)                           | Intergenic |
| 20q11.23 | 36849088  | rs4811602  | $2.5 \times 10^{-31}$  | -5050  | 0.968 | rs6127471  | $5.0 \times 10^{-29}$ | 23583979  | Heart rate                                                                                | KIAA1755   |
| 4q25     | 112659154 | rs1376216  | $3.4 \times 10^{-31}$  | -47404 | 0.685 | rs10034228 | $8.0 \times 10^{-13}$ | 21505071  | Myopia (pathological)                                                                     | MYP11      |
| 6q16.1   | 98346633  | rs1338552  | $1.0 \times 10^{-17}$  | 149319 | 0.732 | rs2505059  | $5.0 \times 10^{-6}$  | 23648065  | Adverse response to chemotherapy (neutropenia/leucopenia) (all anthracycline-based drugs) | MIR2113    |
| 7q11.22  | 70012519  | rs10234796 | $1.2 \times 10^{-8}$   | 33422  | 0.525 | rs10237317 | $5.0 \times 10^{-6}$  | 22925353  | Bipolar disorder                                                                          | AUTS2      |
| 2q12.1   | 104090213 | rs266053   | $3.1 \times 10^{-8}$   | 208328 | 0.593 | rs264943   | $7.0 \times 10^{-6}$  | 22174851  | HIV-1 viral setpoint                                                                      | Intergenic |

## Replication of GWAS Catalog Results

The following table shows, for each GWAS Catalog result for similar traits, our association test result for our best available proxy (distance < 100kb,  $r^2 > 0.8$ ).

*no relevant GWAS catalog terms were available*

## Nearby Nonsynonymous SNPs

| region   | position  | our.name   | our.pval              | dist    | rsqr  | assay.name | gene     | aa.chg |
|----------|-----------|------------|-----------------------|---------|-------|------------|----------|--------|
| 20q11.23 | 36849088  | rs4811602  | $2.5 \times 10^{-31}$ | -7174   | 0.916 | rs3746471  | KIAA1755 | R1045W |
| 20q11.23 | 36849088  | rs4811602  | $2.5 \times 10^{-31}$ | -3350   | 0.524 | rs760998   | KIAA1755 | E940K  |
| 4q32.3   | 170013910 | rs17626617 | $9.2 \times 10^{-15}$ | 23662   | 0.673 | rs3811813  | SH3RF1   | P663S  |
| 10q23.1  | 84722619  | rs11814950 | $2.0 \times 10^{-12}$ | 22307   | 1.000 | rs17101193 | NRG3     | N552K  |
| Xq21.1   | 79956549  | rs28417201 | $9.1 \times 10^{-9}$  | -257956 | 0.750 | rs1113265  | FAM46D   | D185E  |

## Nearby Expression QTLs

| region  | position | our.name  | our.pval              | dist   | rsqr  | assay.name | eqtl.dist | eqtl.gene | eqtl.pval | eqtl.rsqr | tissue | pubmed.id |
|---------|----------|-----------|-----------------------|--------|-------|------------|-----------|-----------|-----------|-----------|--------|-----------|
| 4p15.33 | 12080930 | rs9991510 | $1.9 \times 10^{-41}$ | -62937 | 0.799 | rs6448852  | -1576156  | ZNF518B   | 0.00026   | 0.047     | B-Cell | 22446964  |
| 6q16.1  | 98346633 | rs1338552 | $1.0 \times 10^{-17}$ | -17859 | 0.672 | rs9401295  | 992929    | FBXL4     | 0.00025   | 0.047     | B-Cell | 22446964  |

## Nearby Clinical Variants

no hits were found for clinical variants

## Regional Association Plots

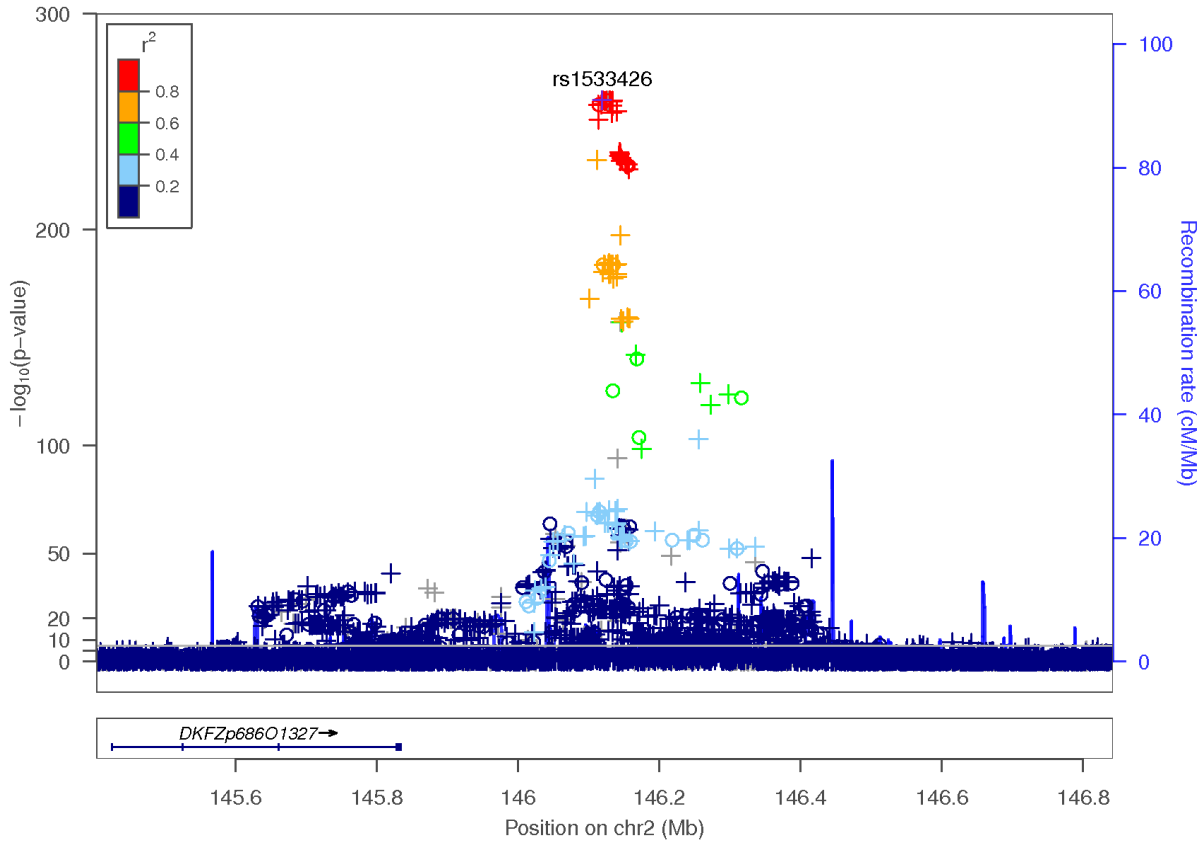

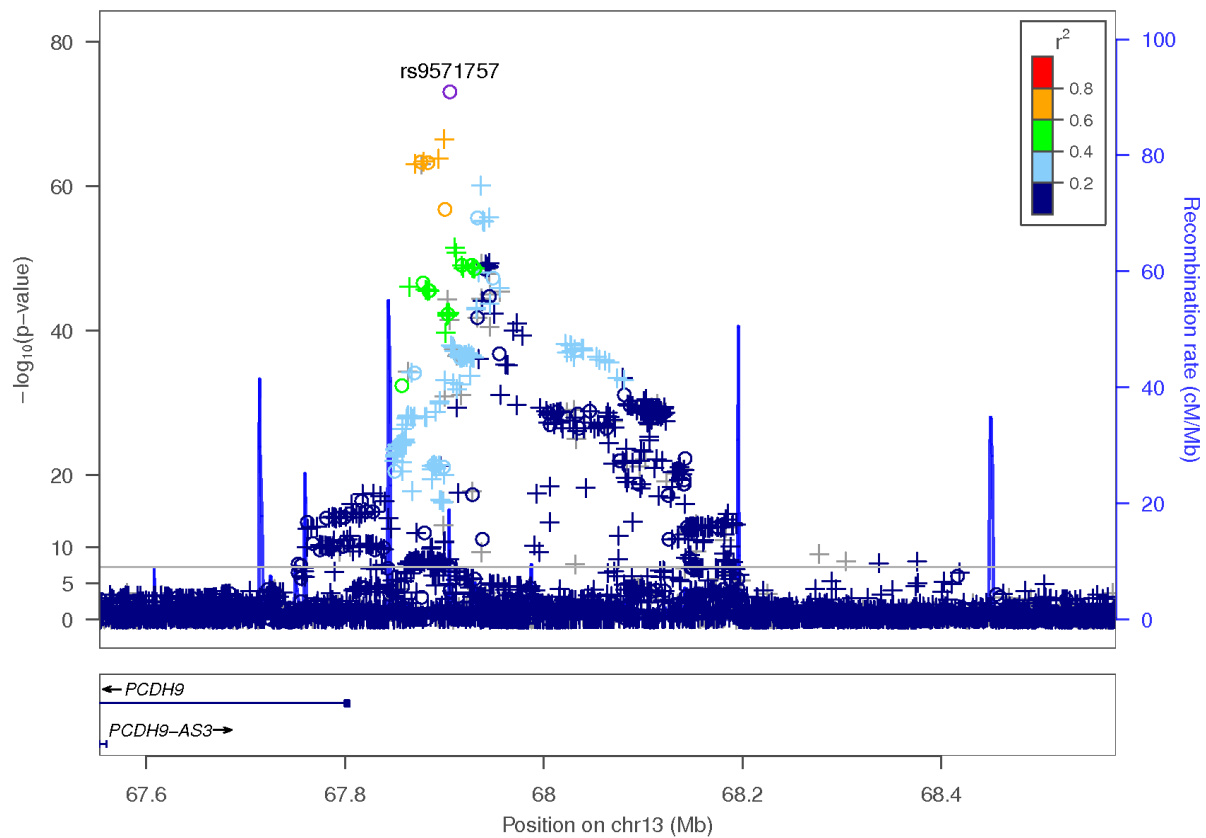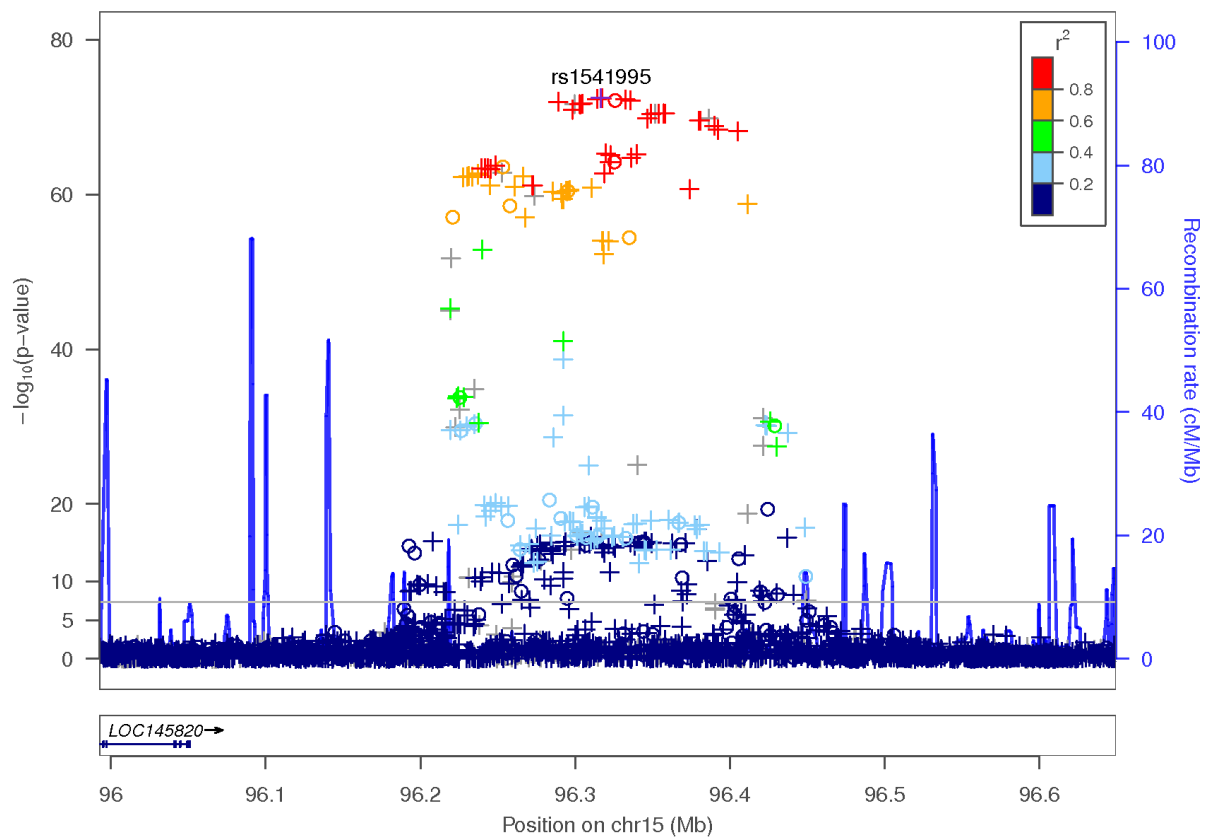

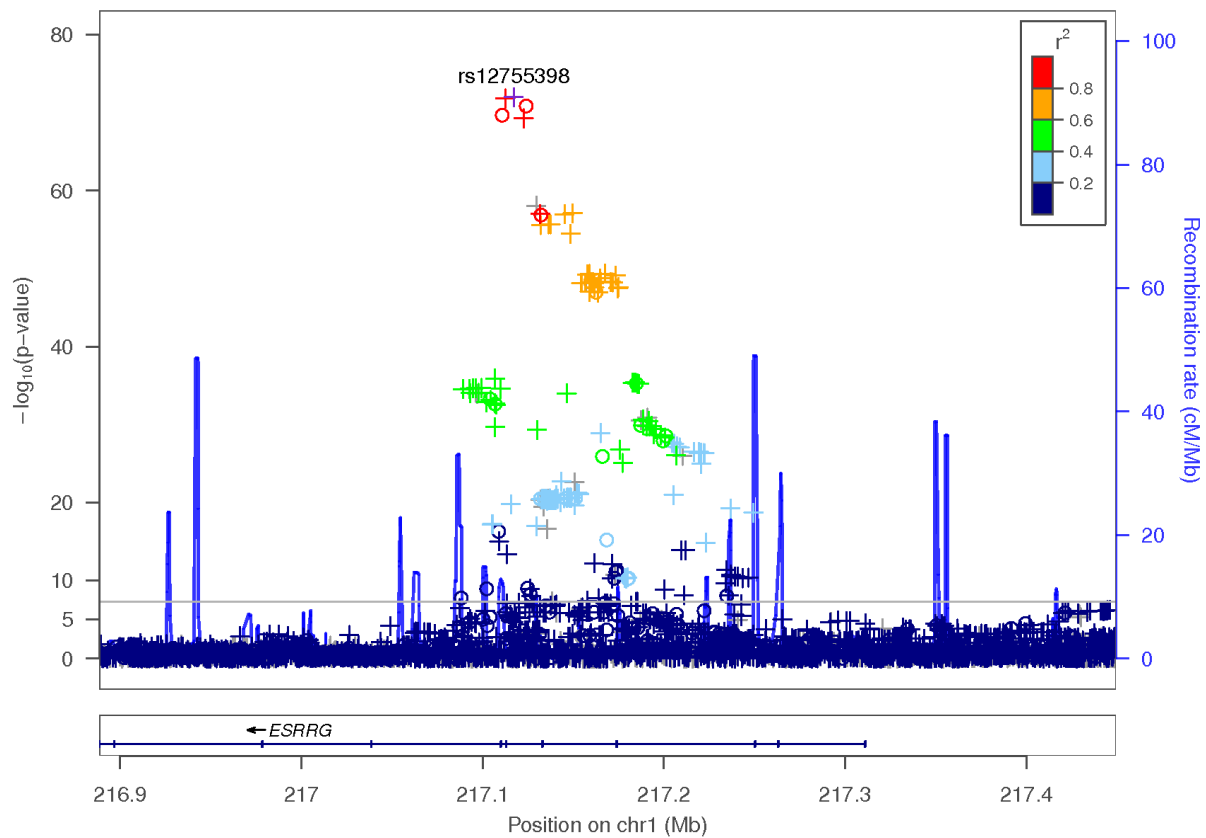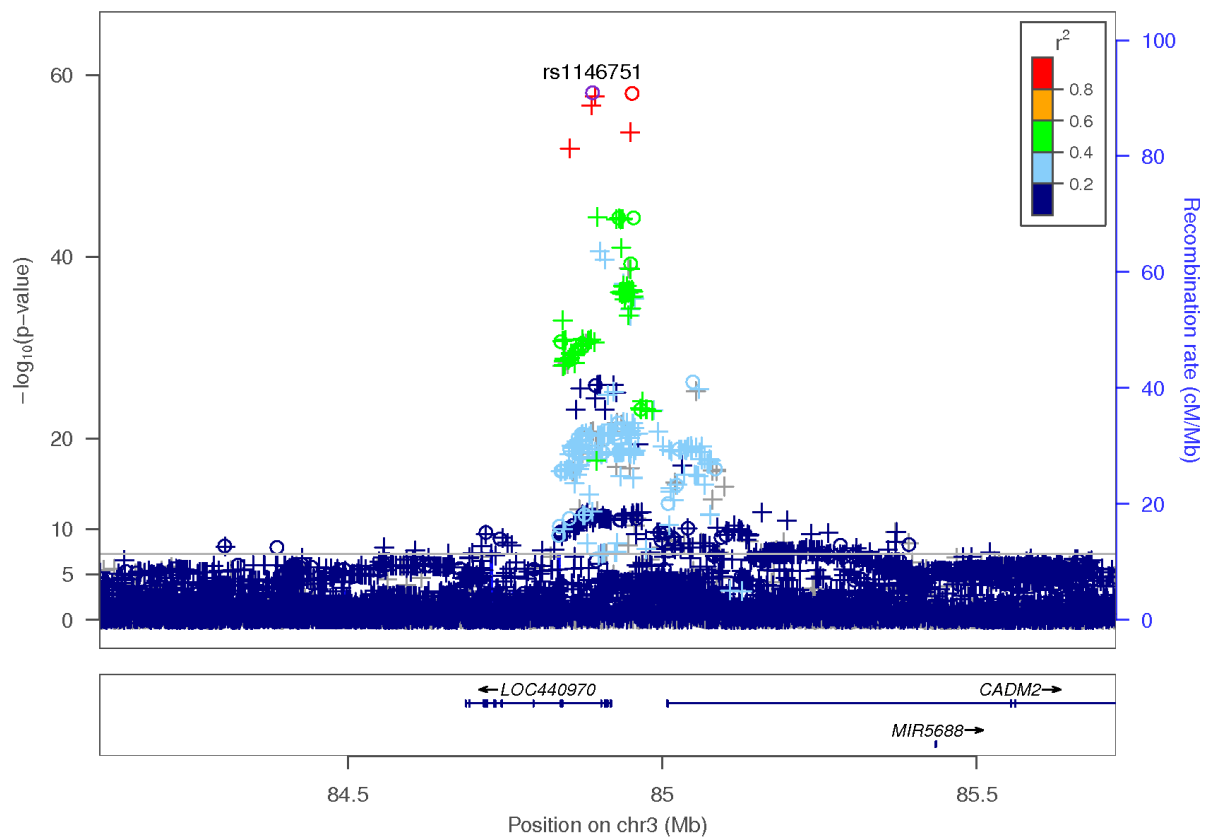



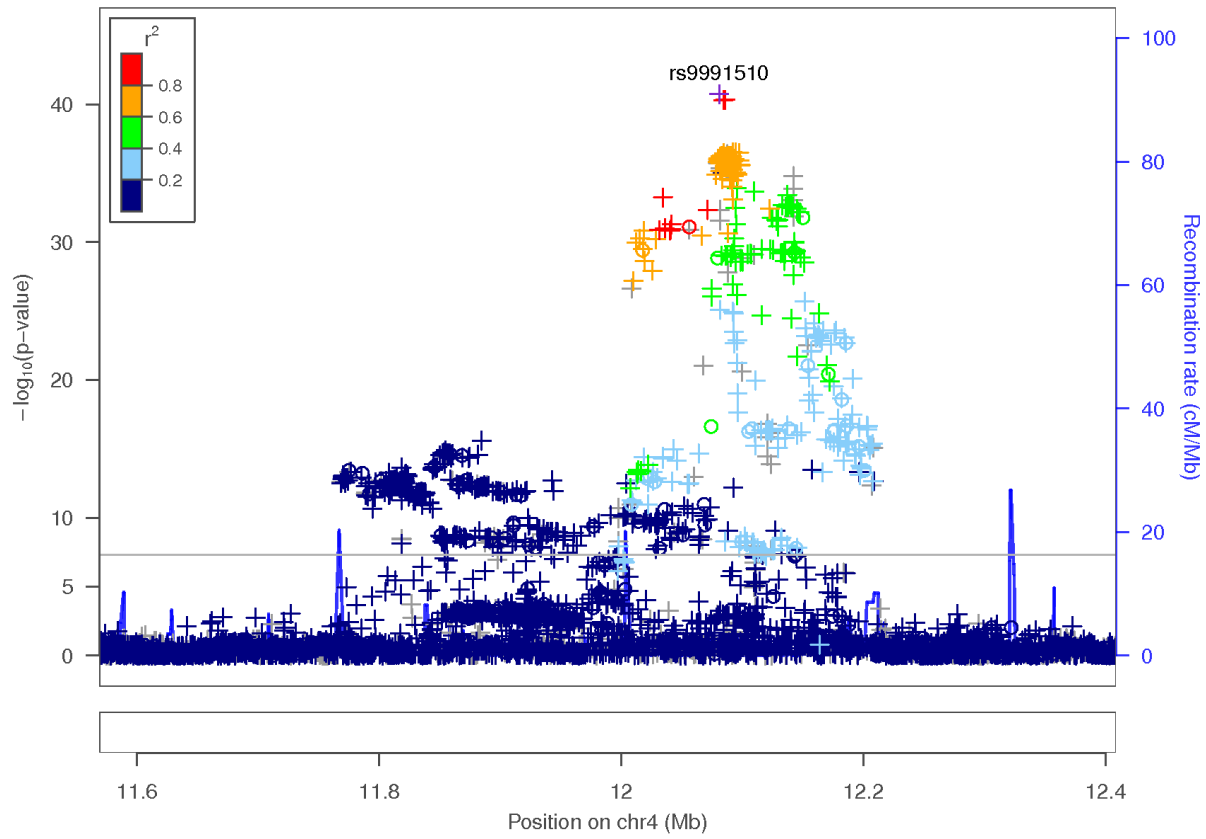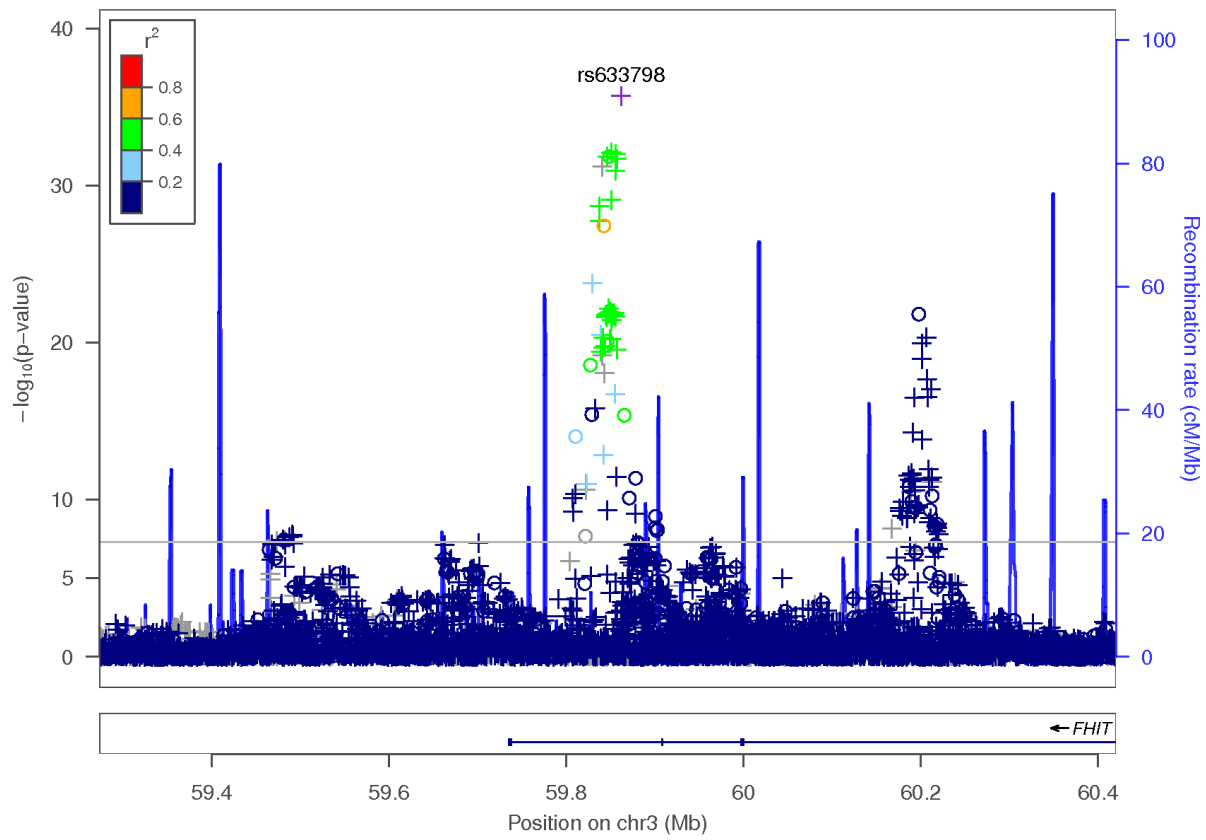

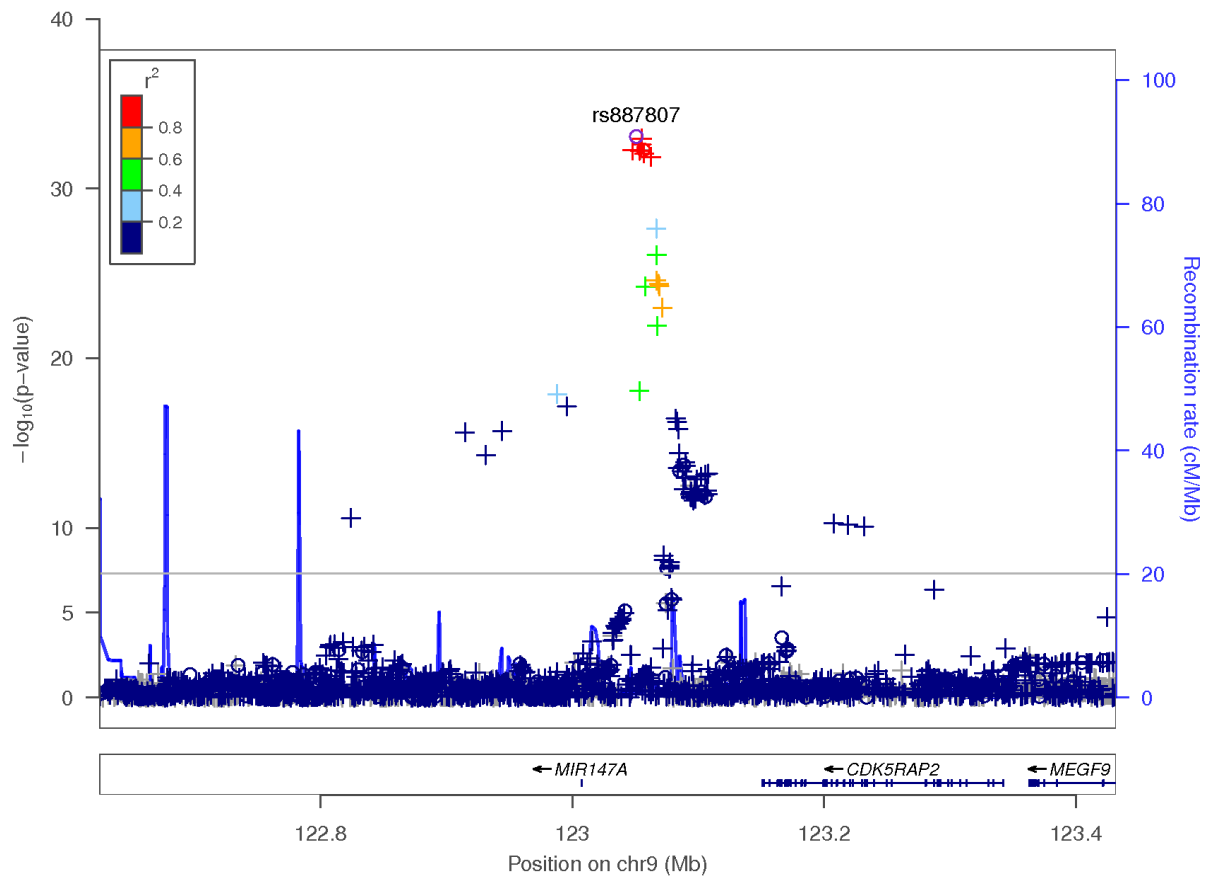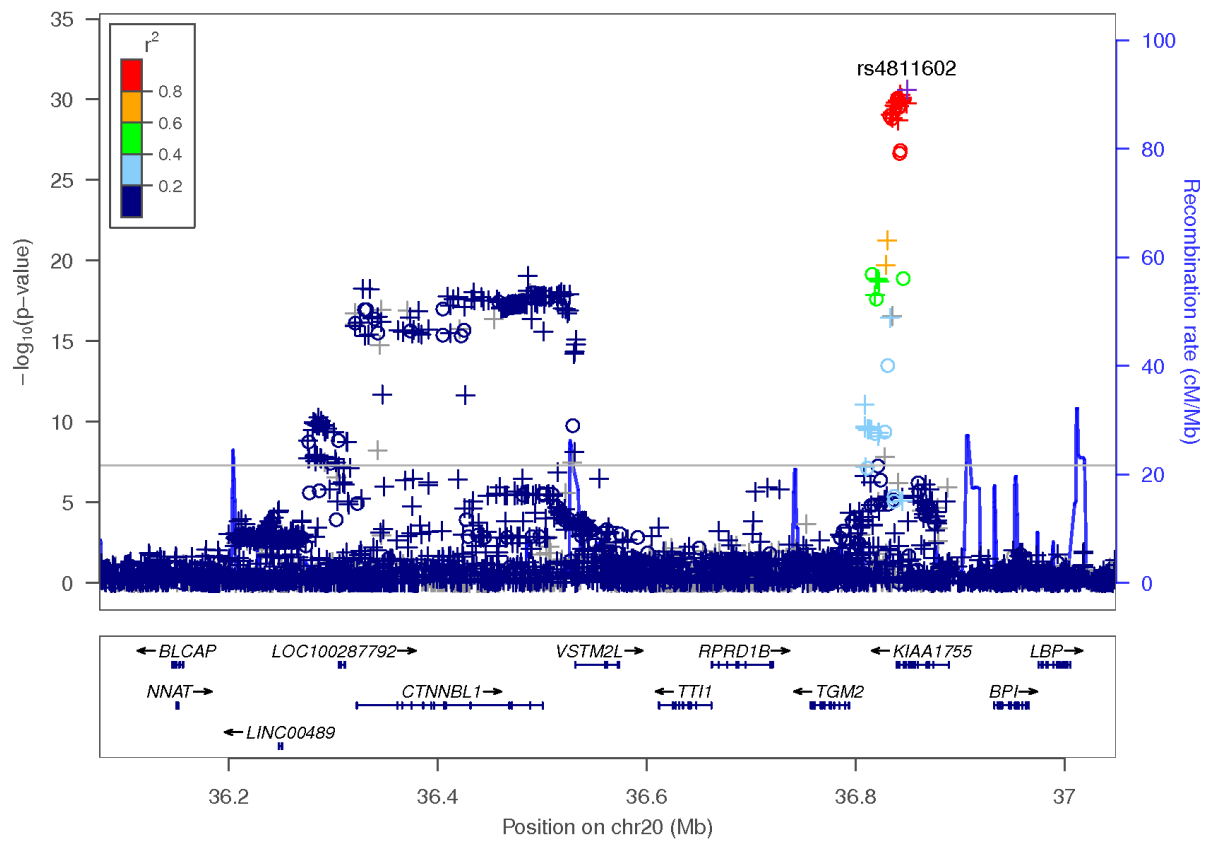

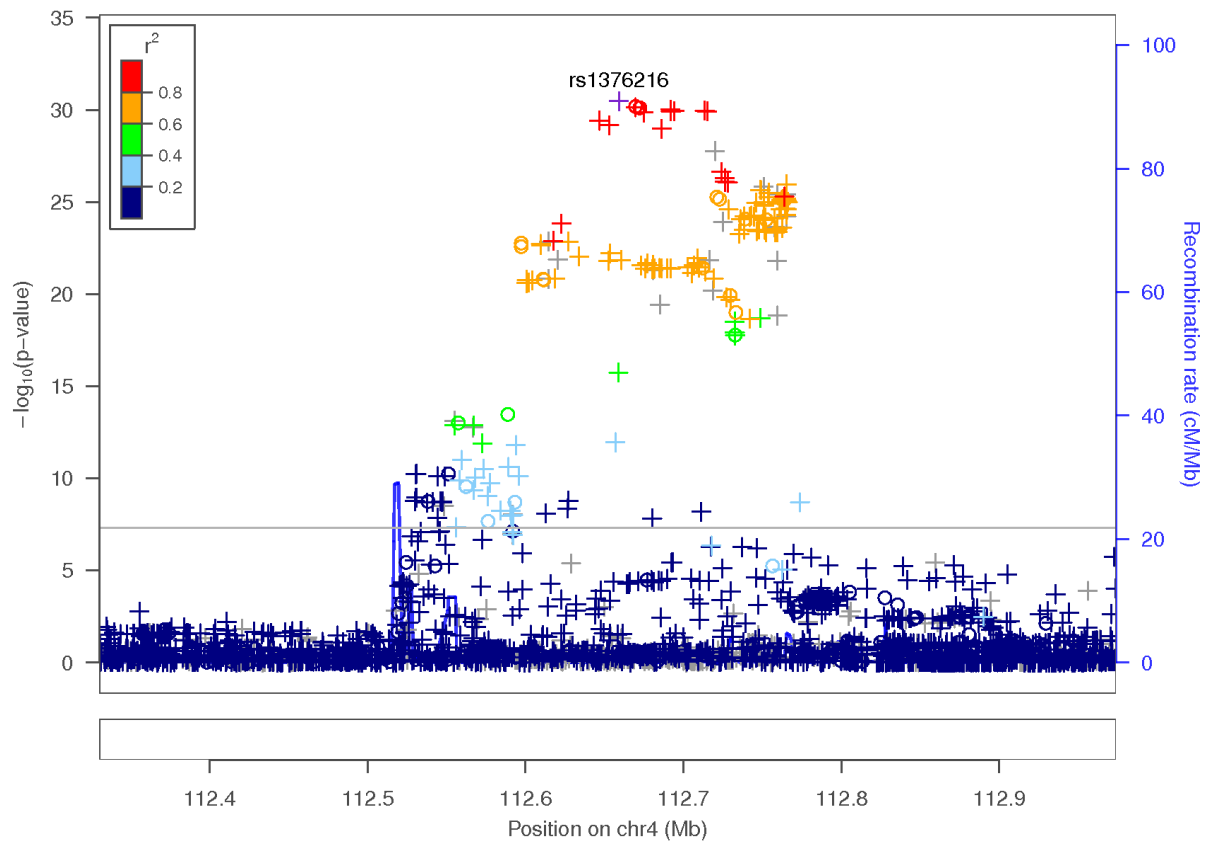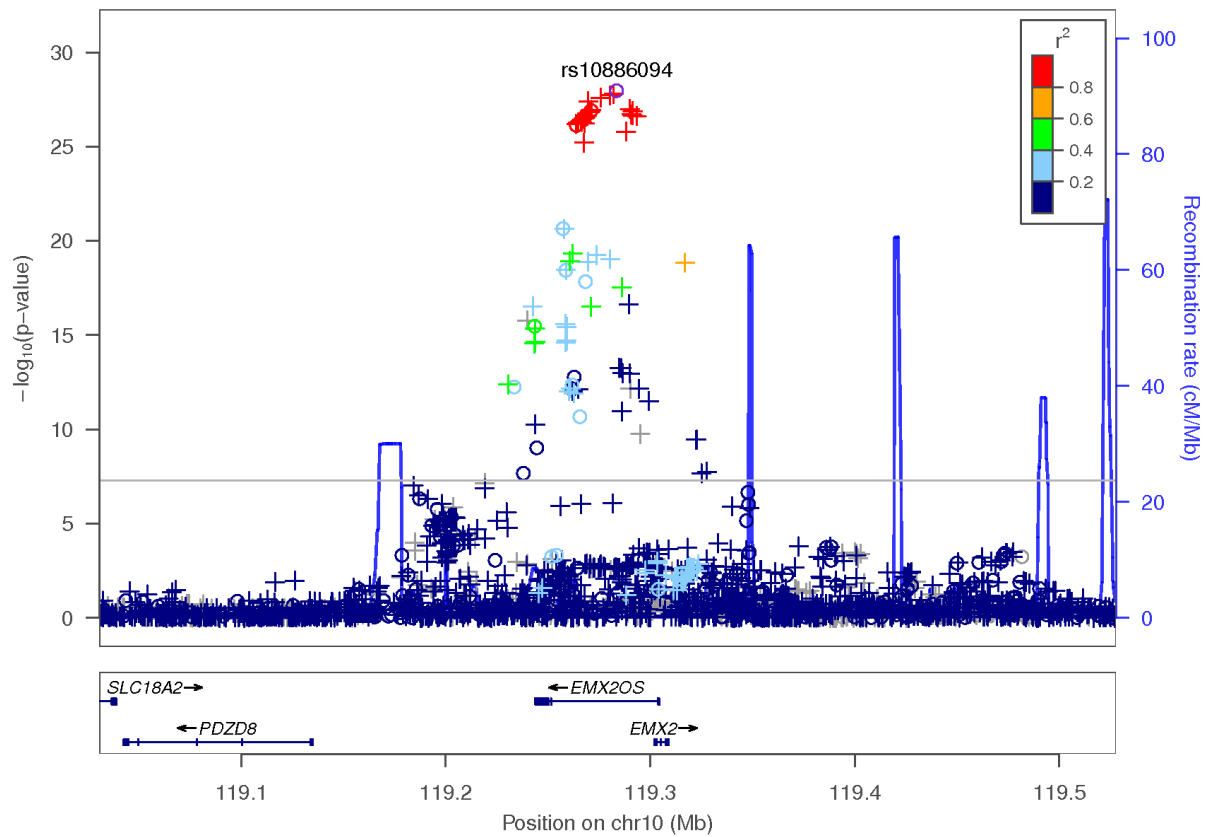

locuszoom plot for rs368977885 failed

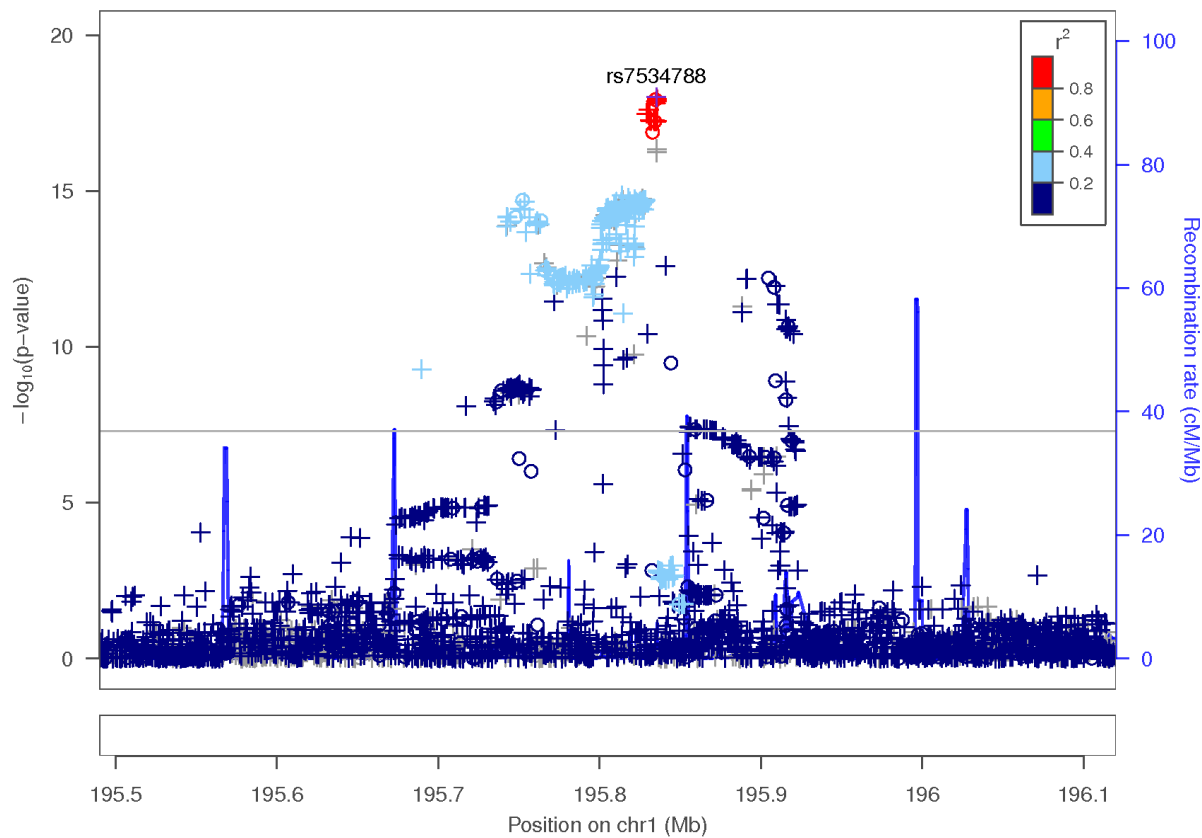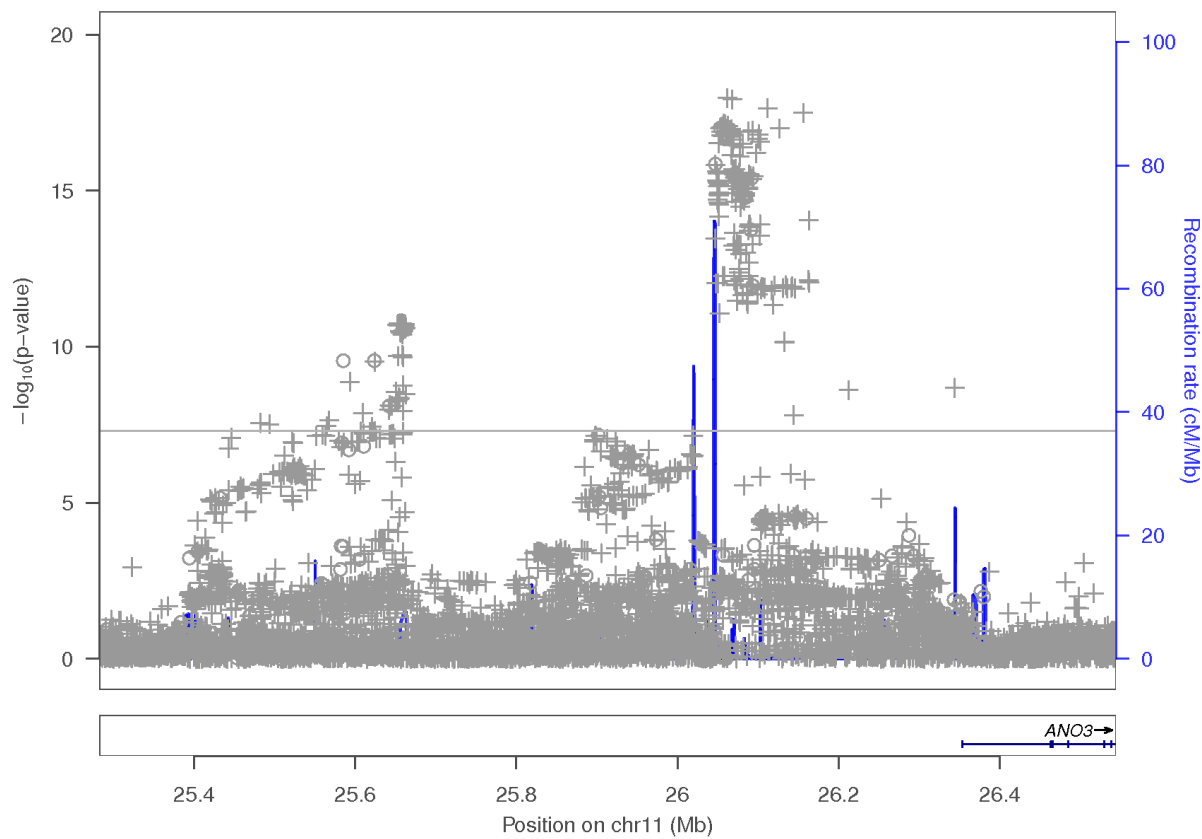

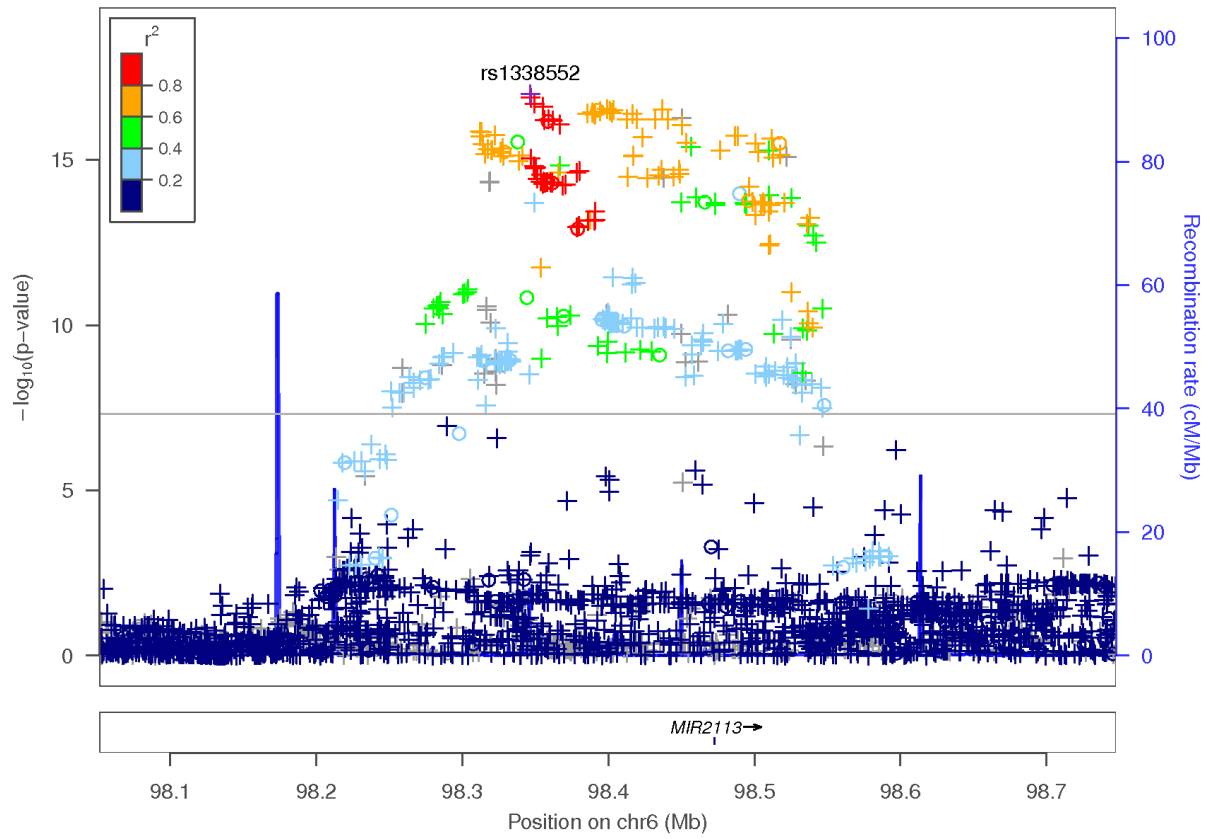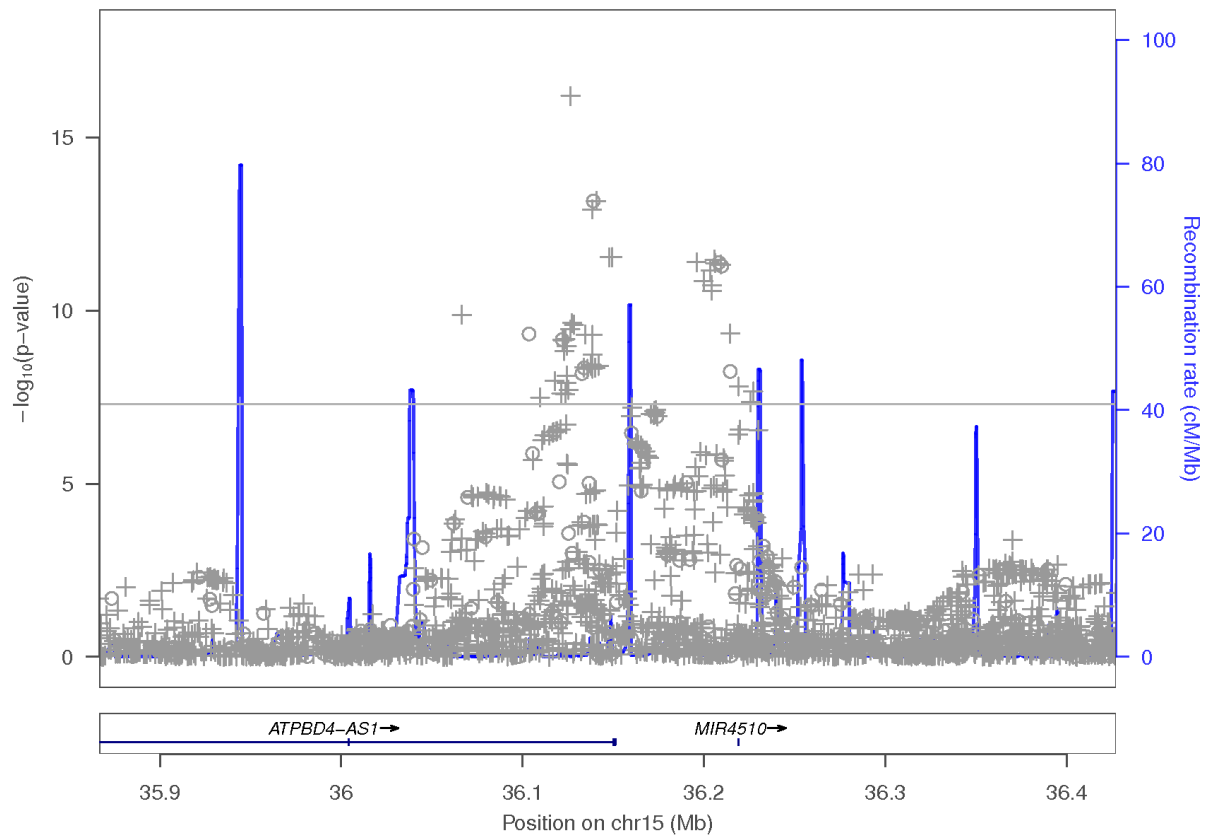

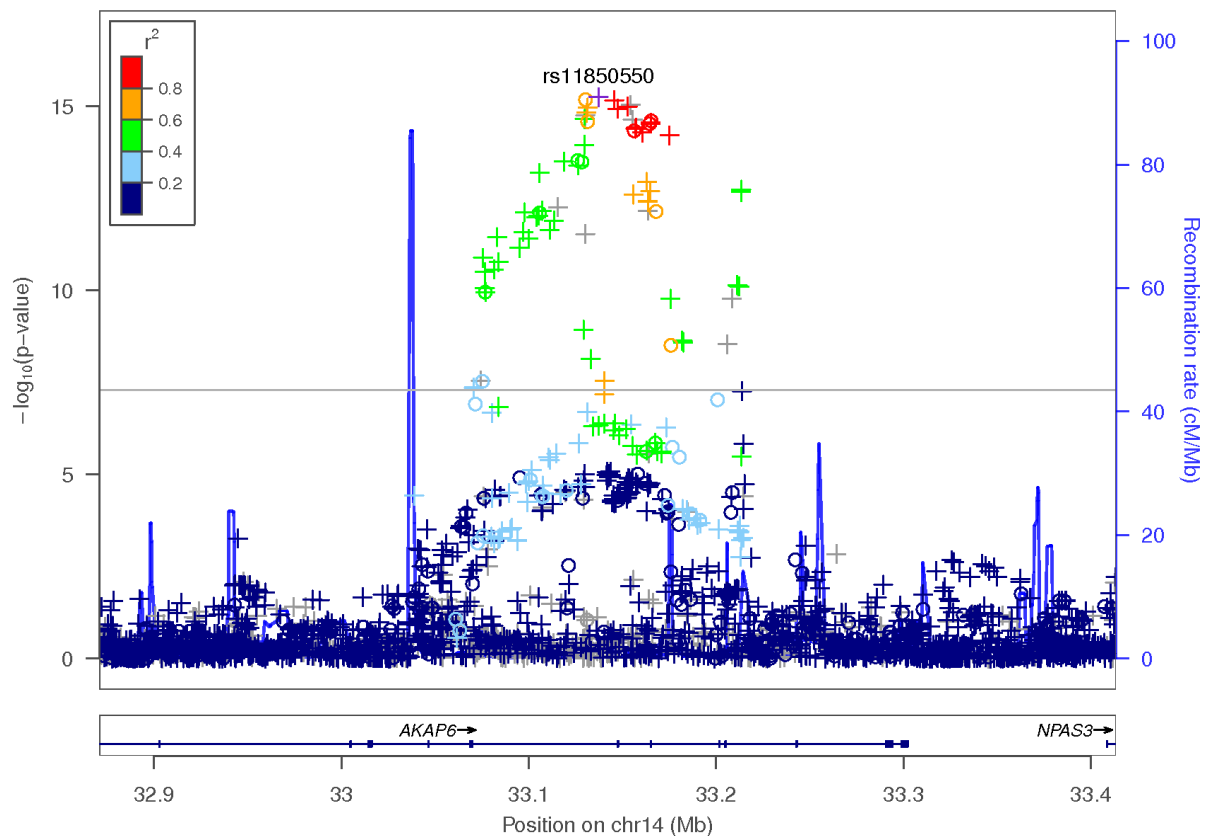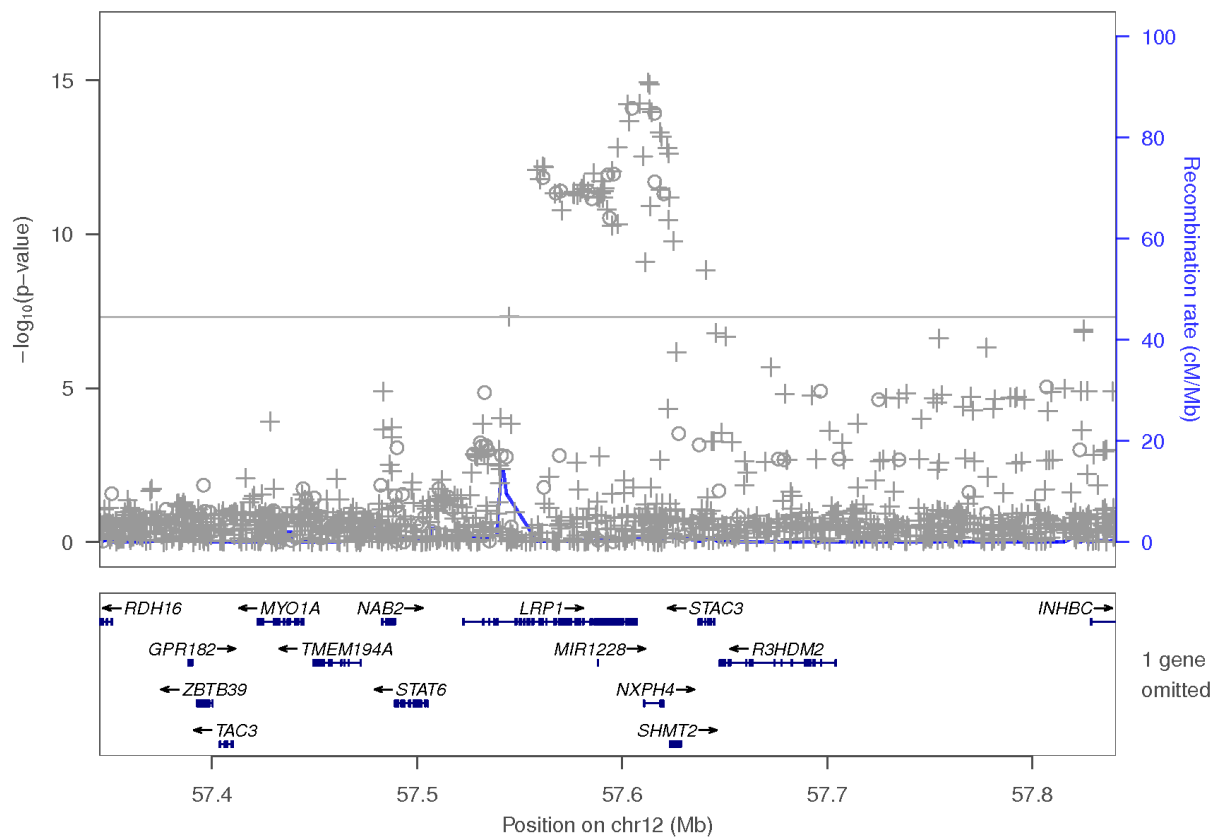

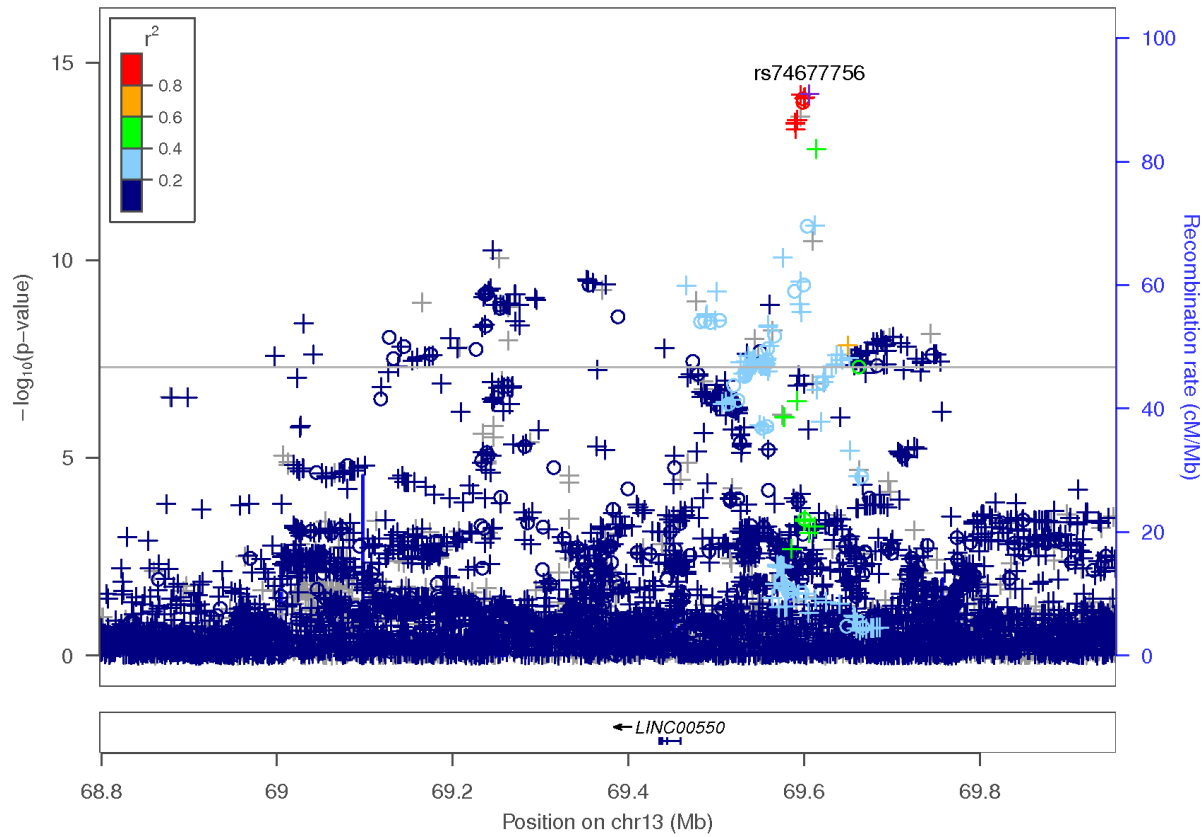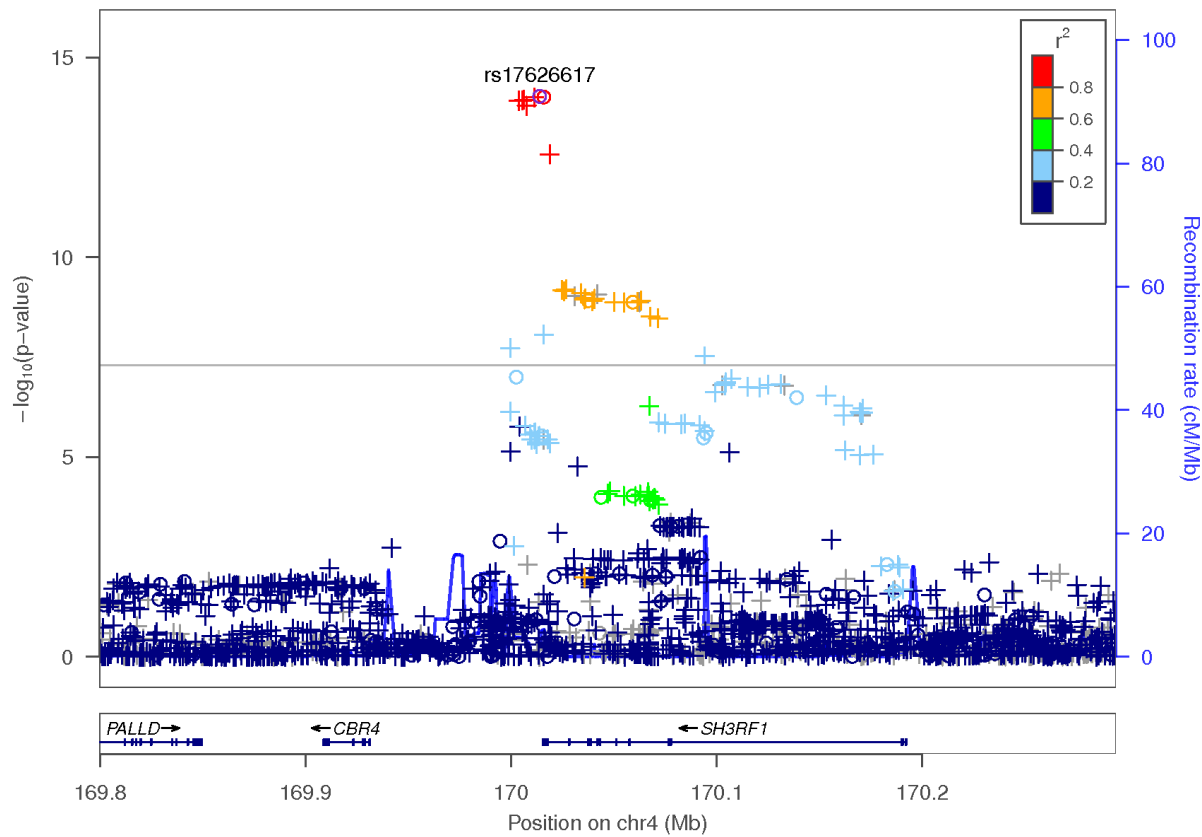

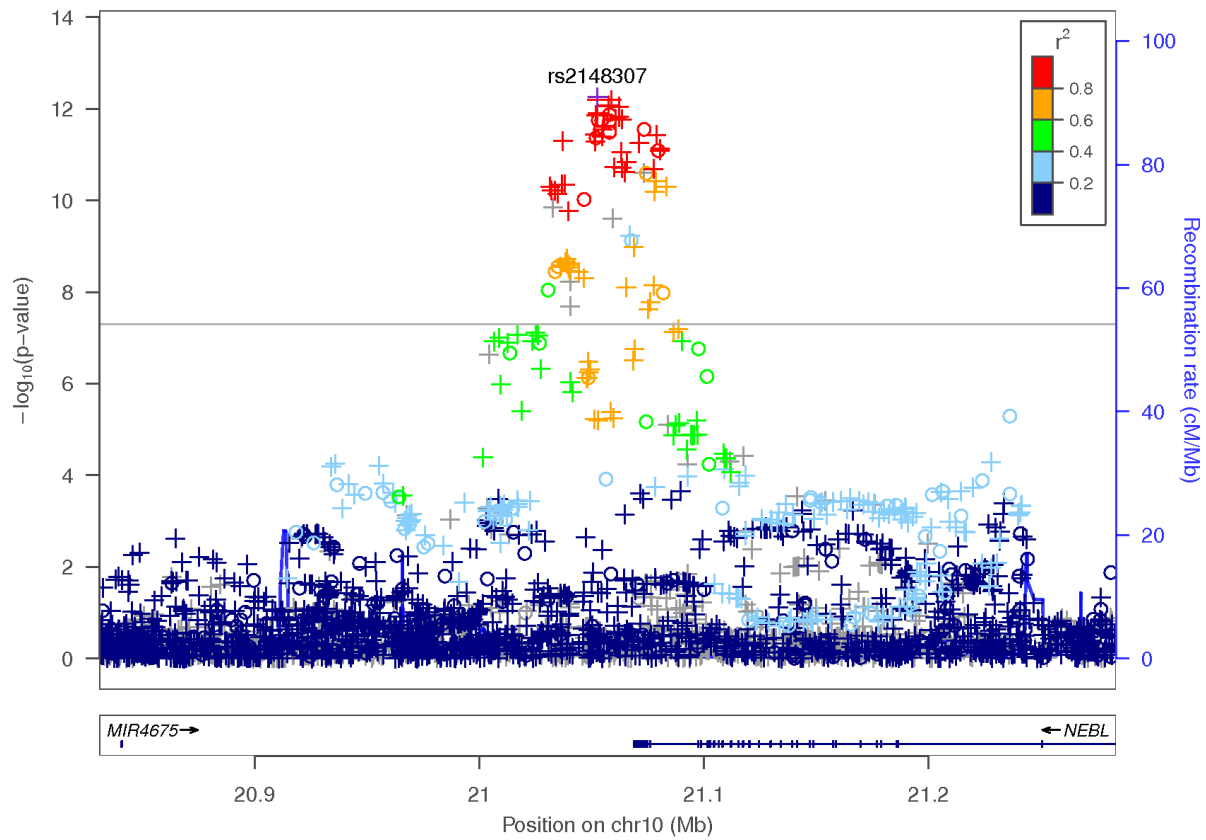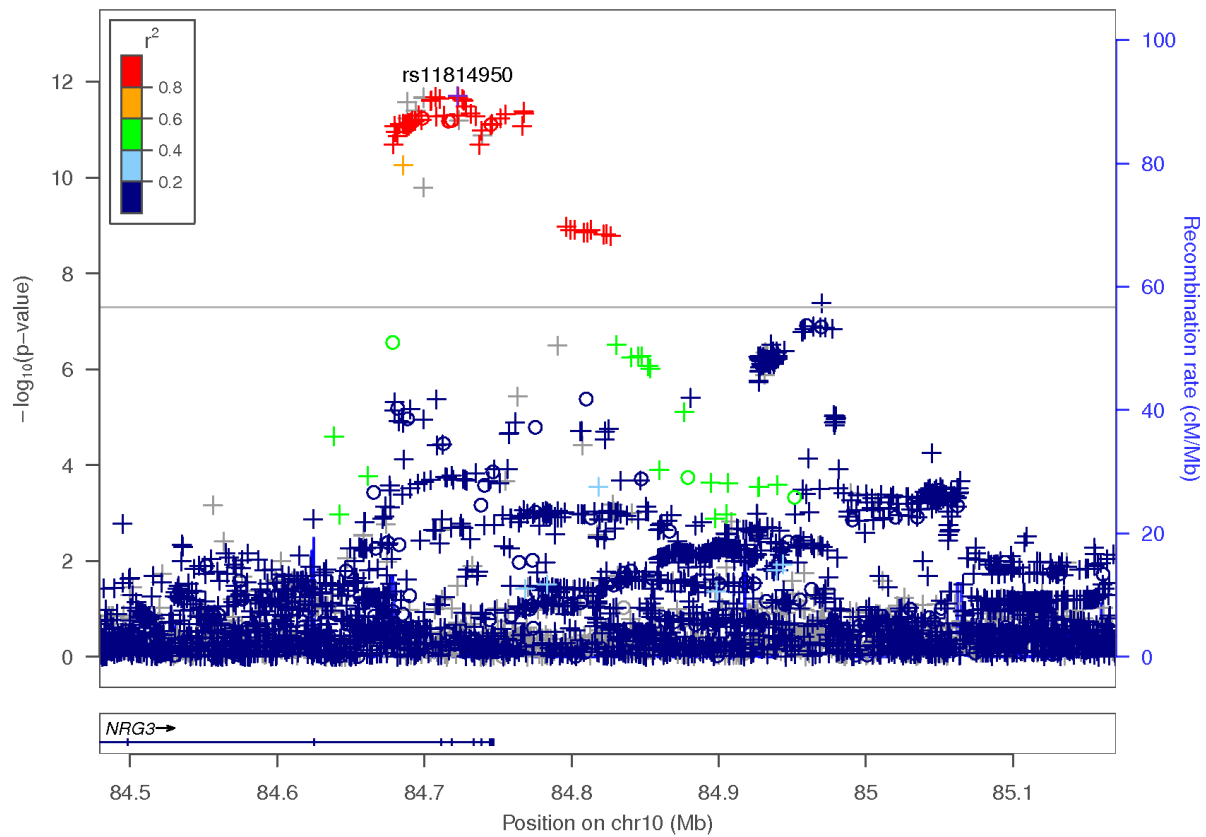



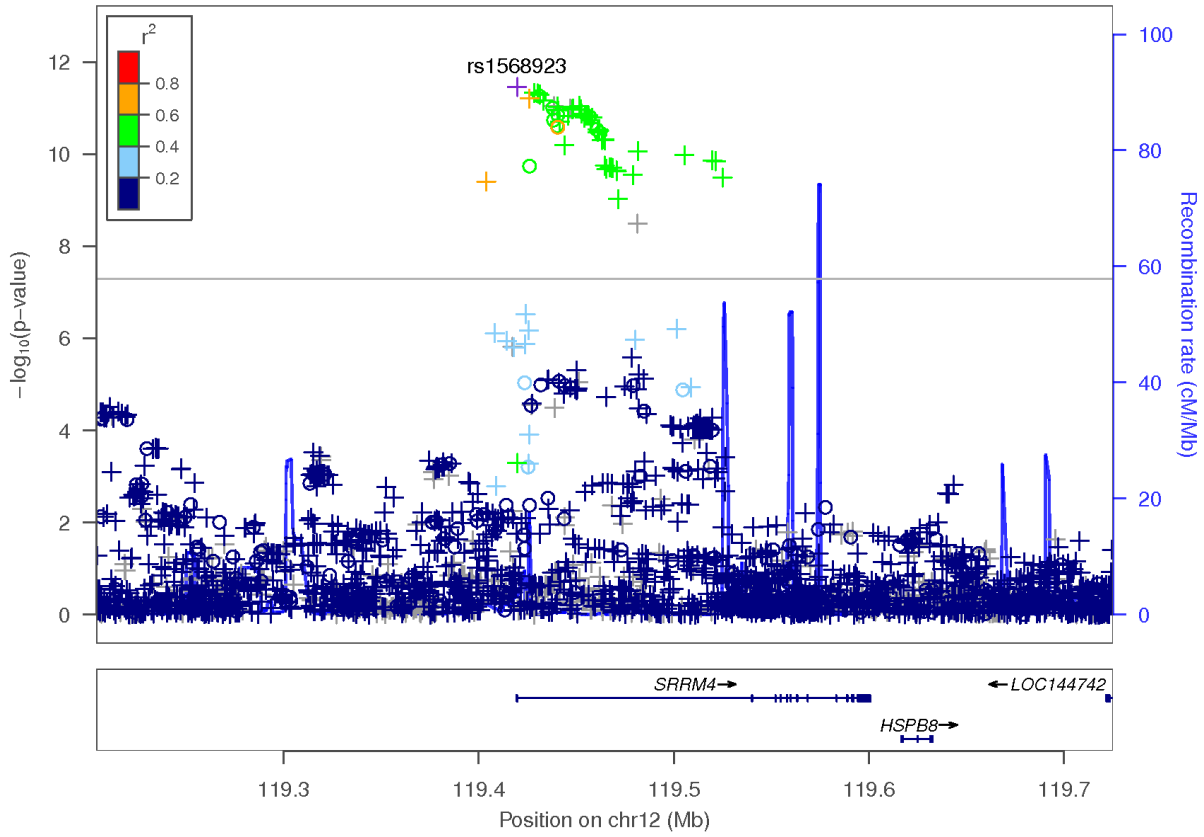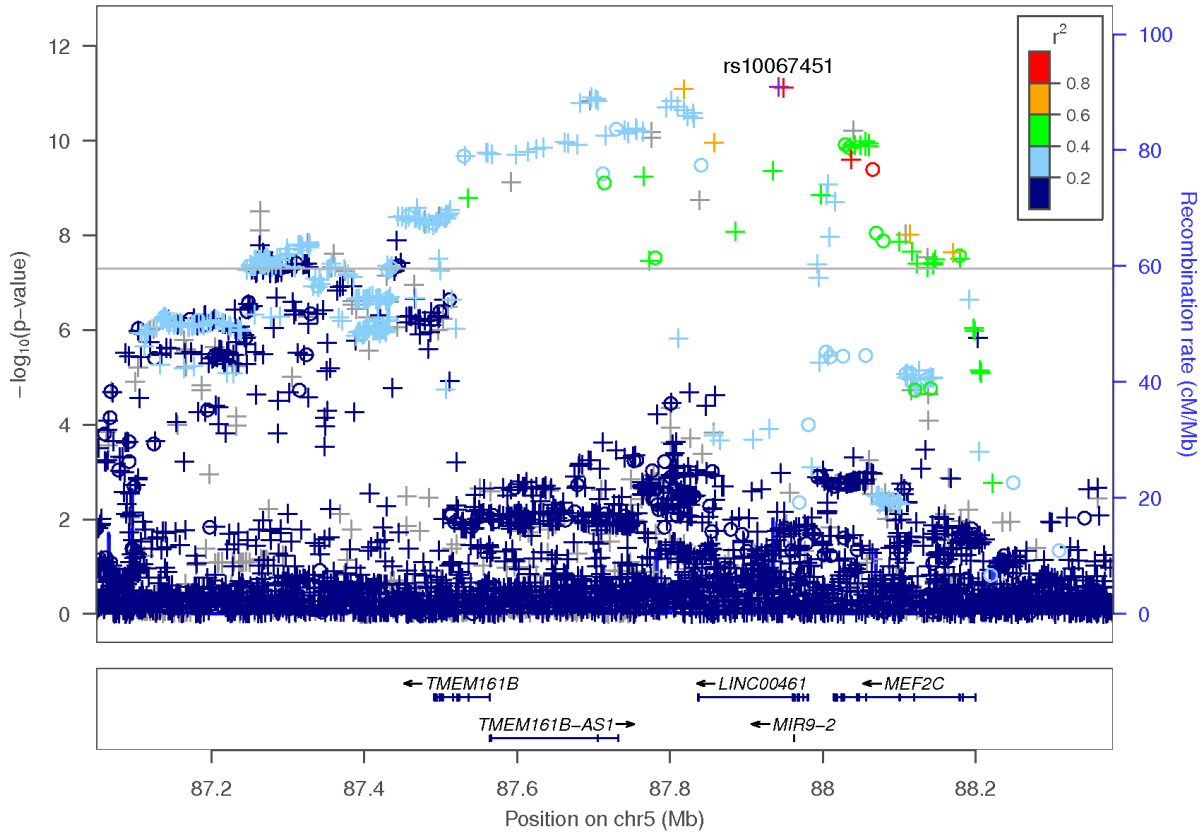

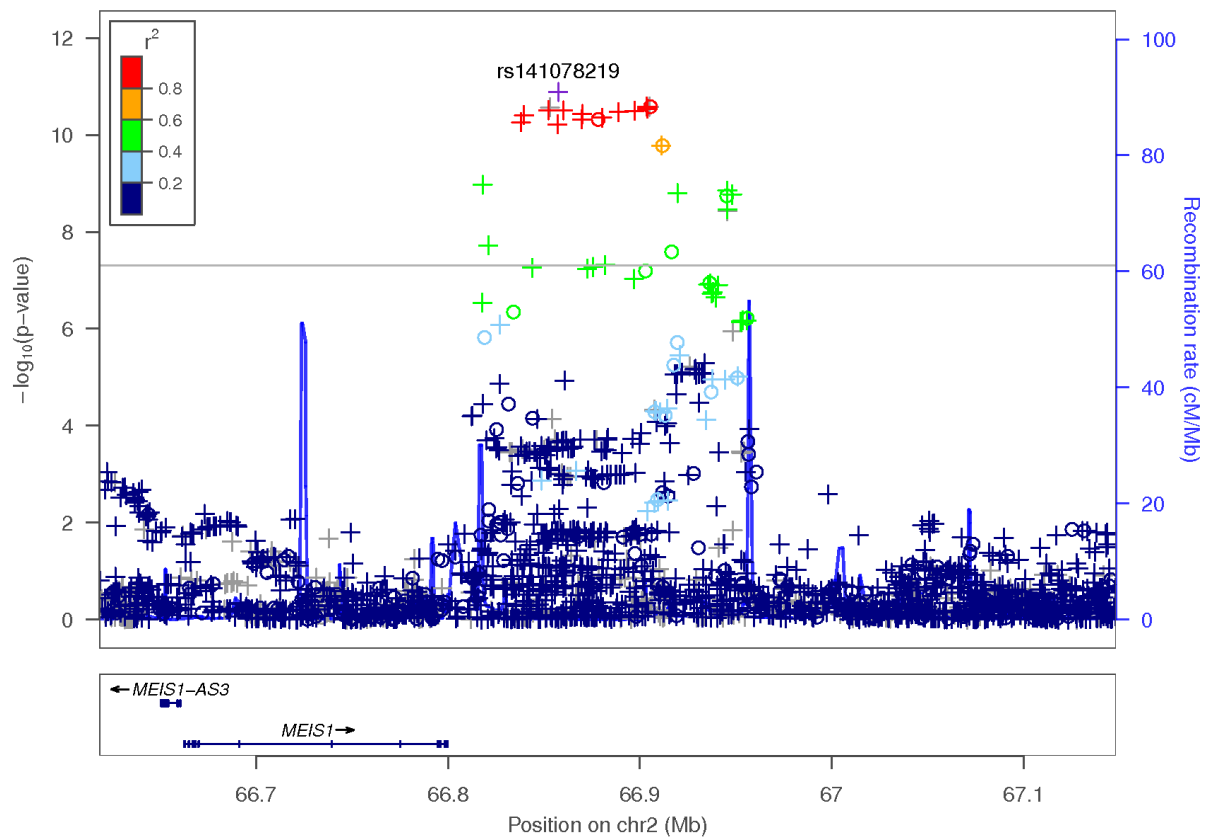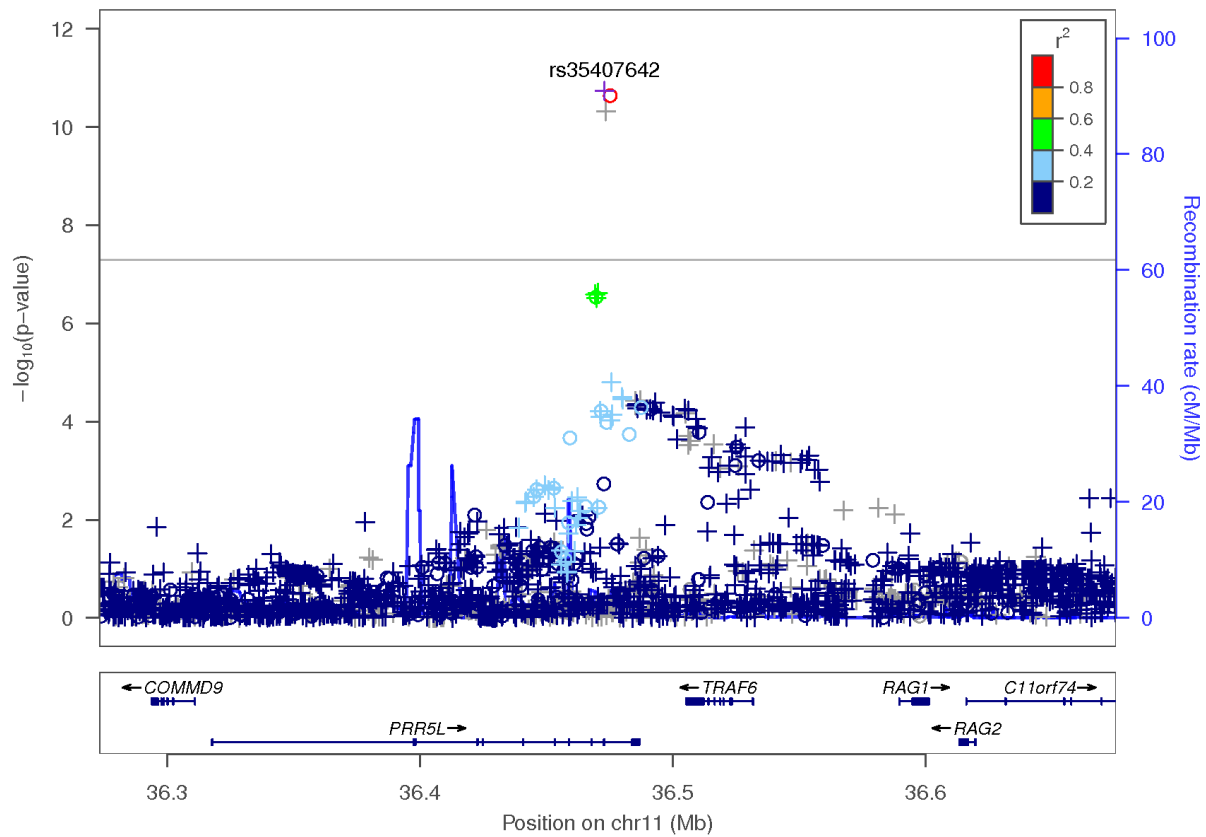

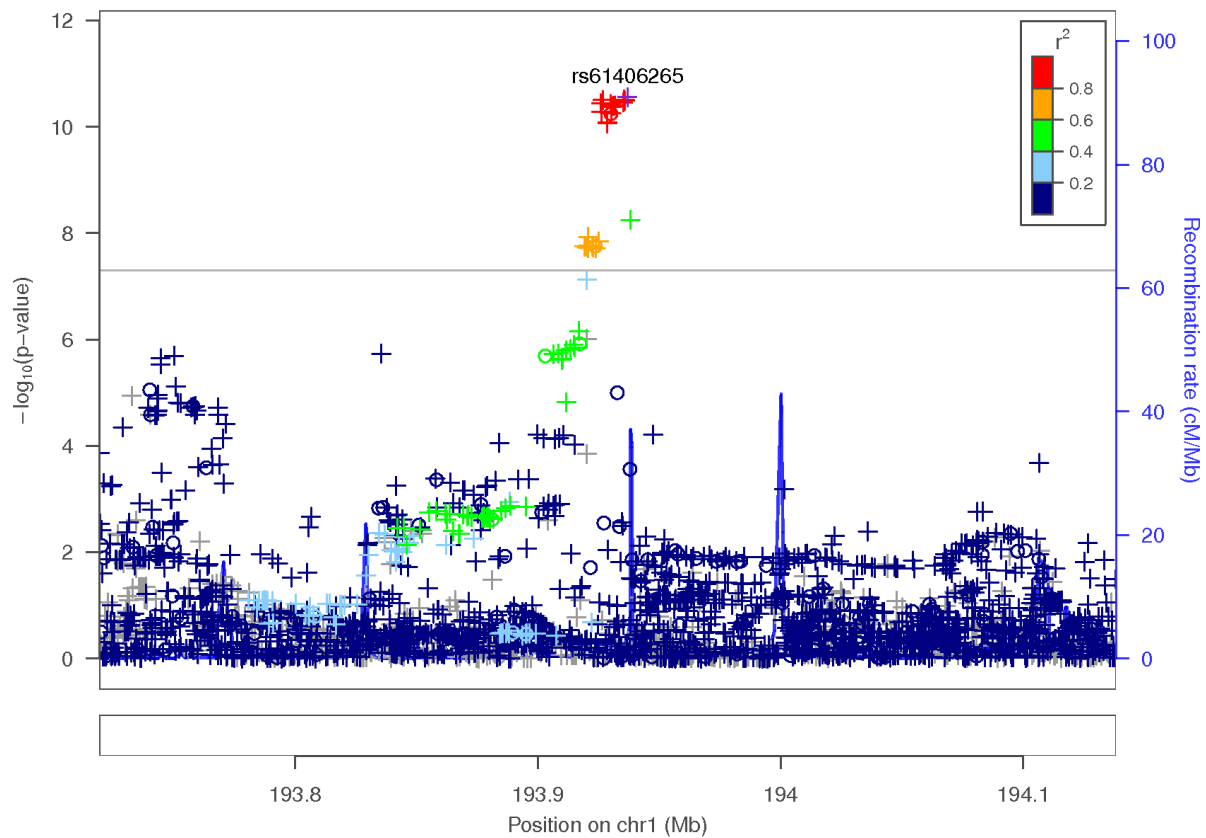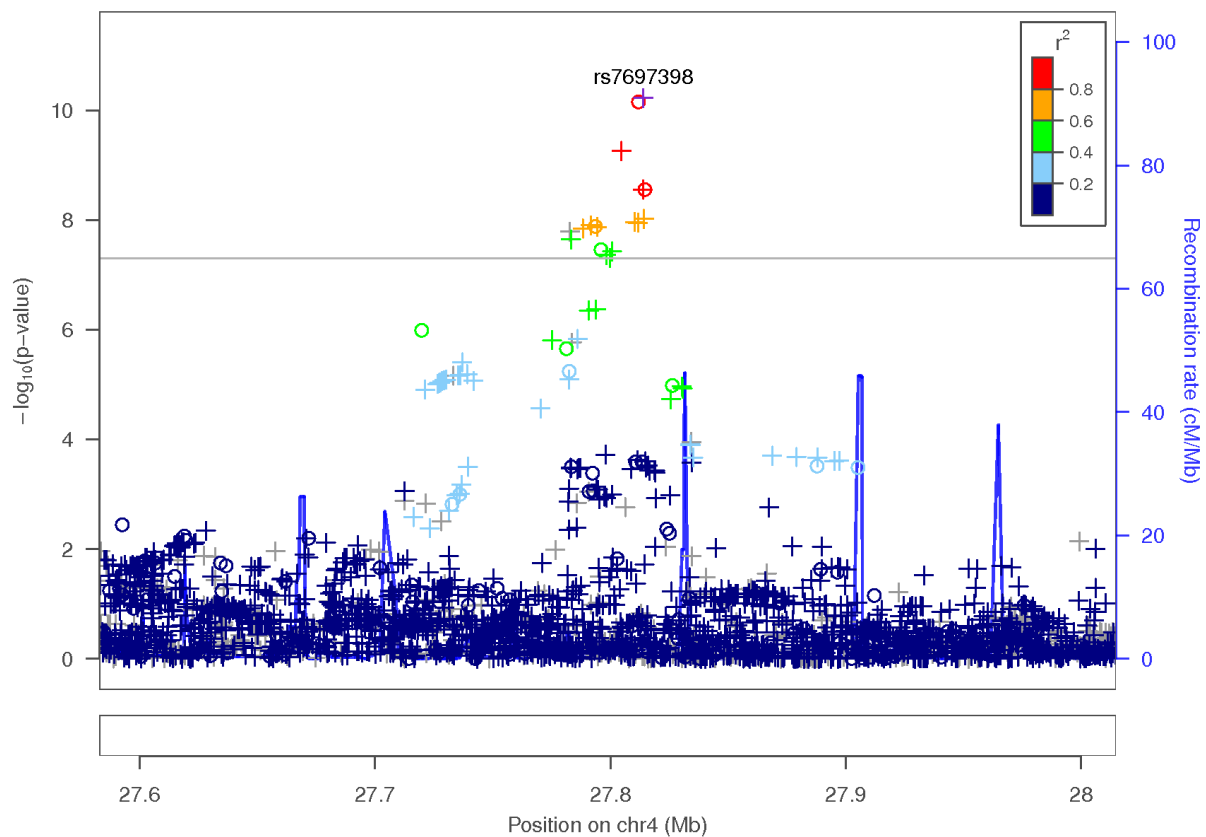

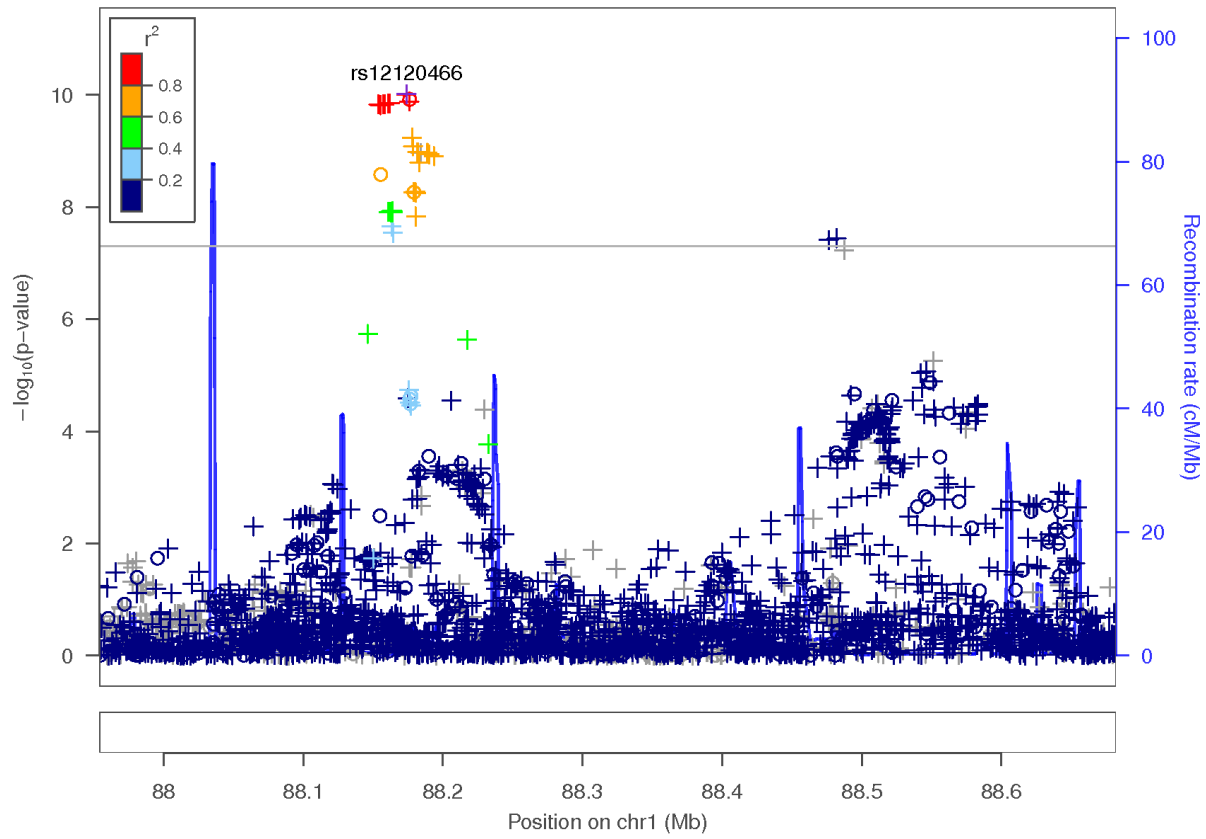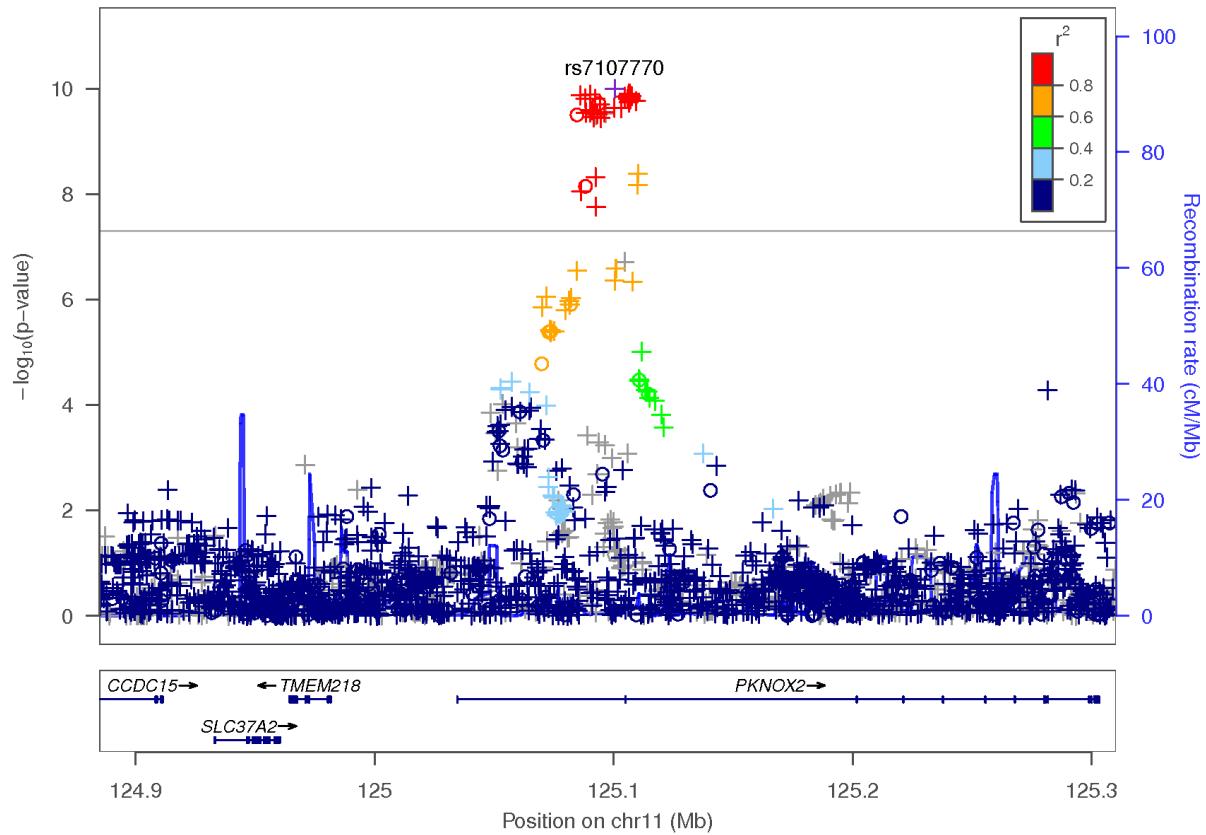

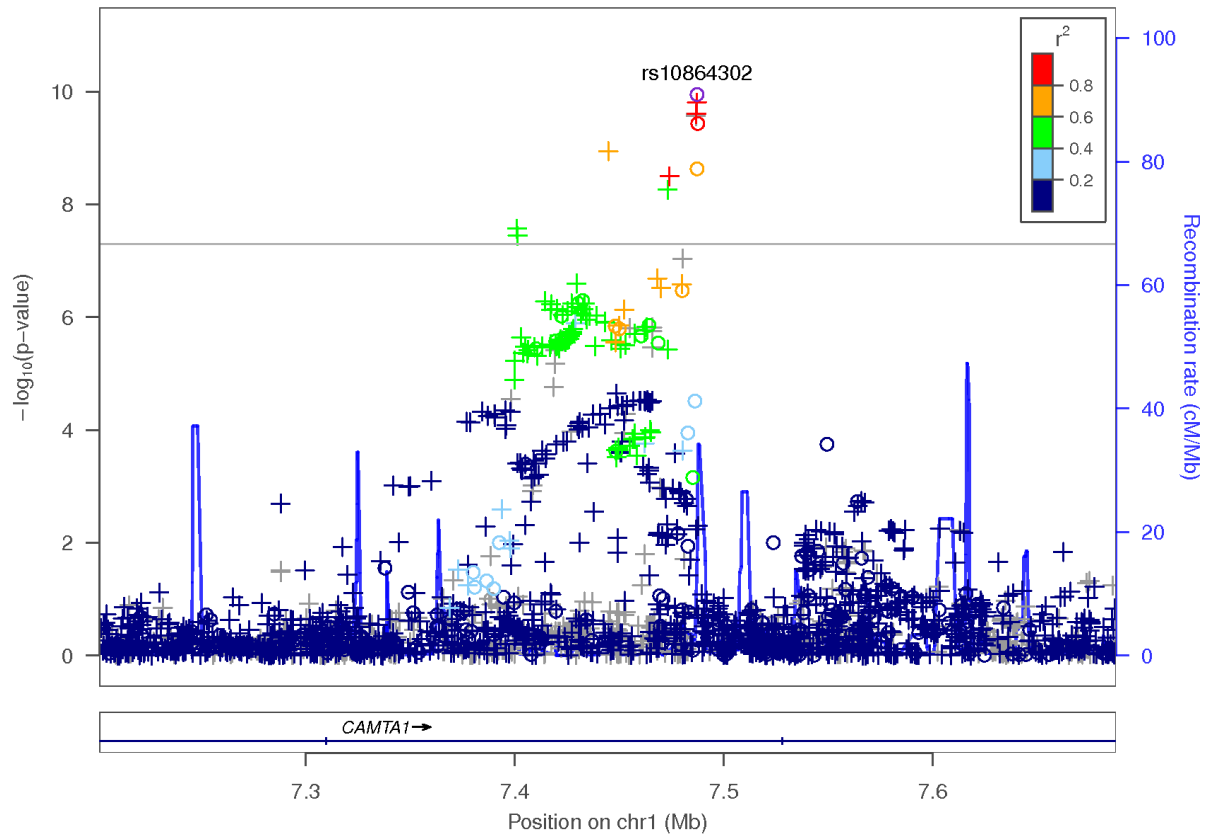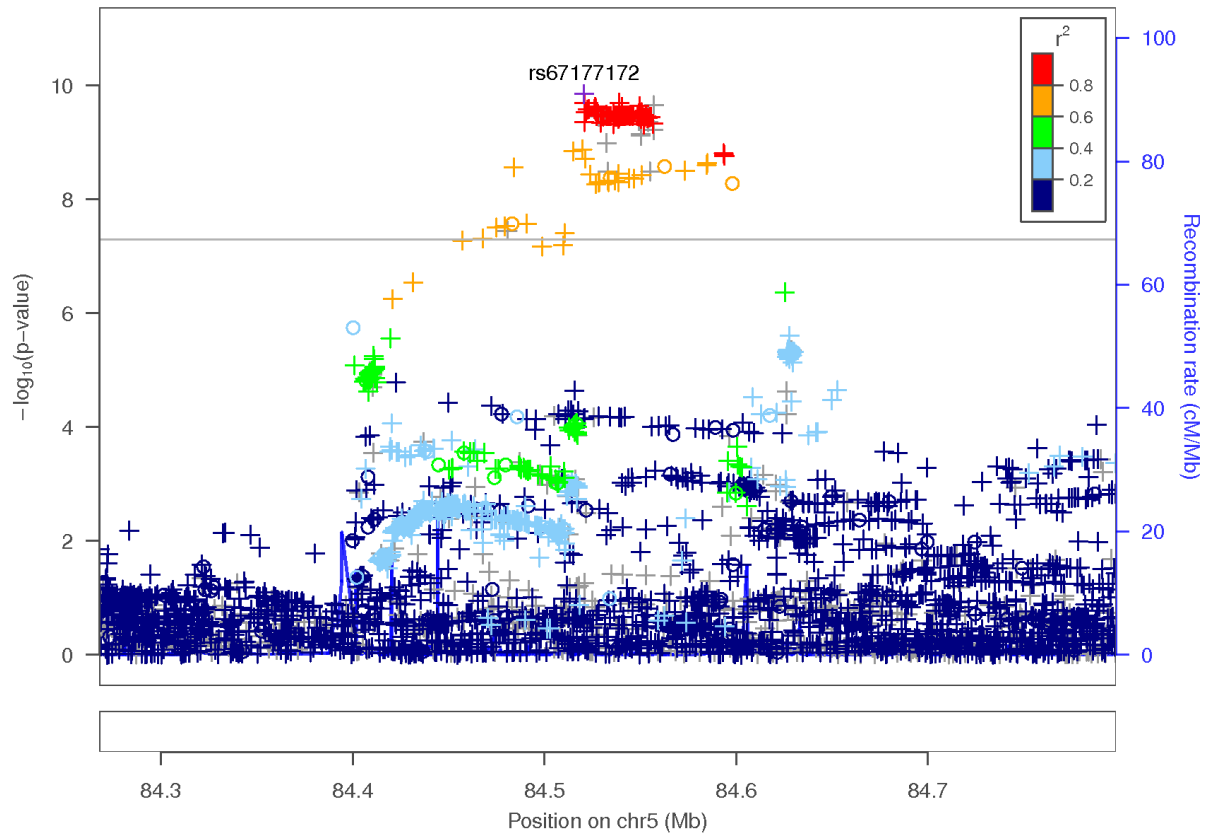

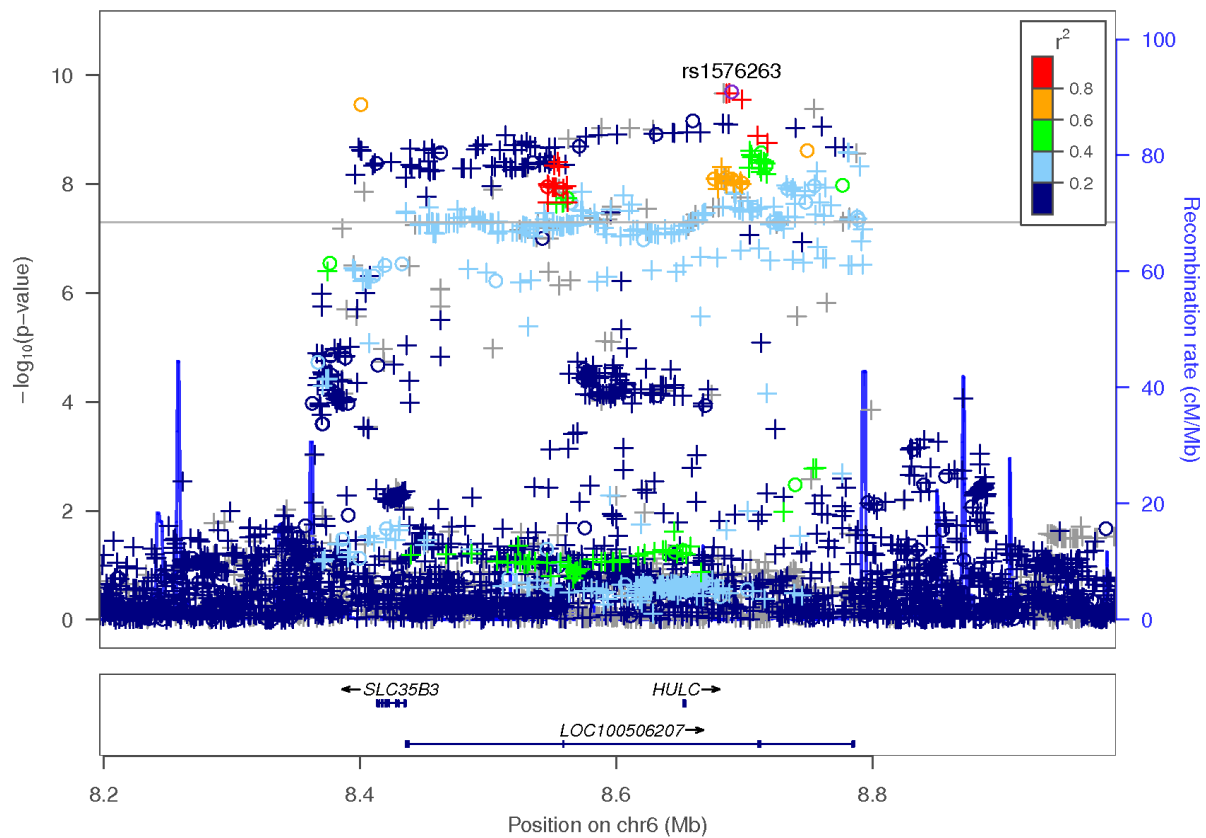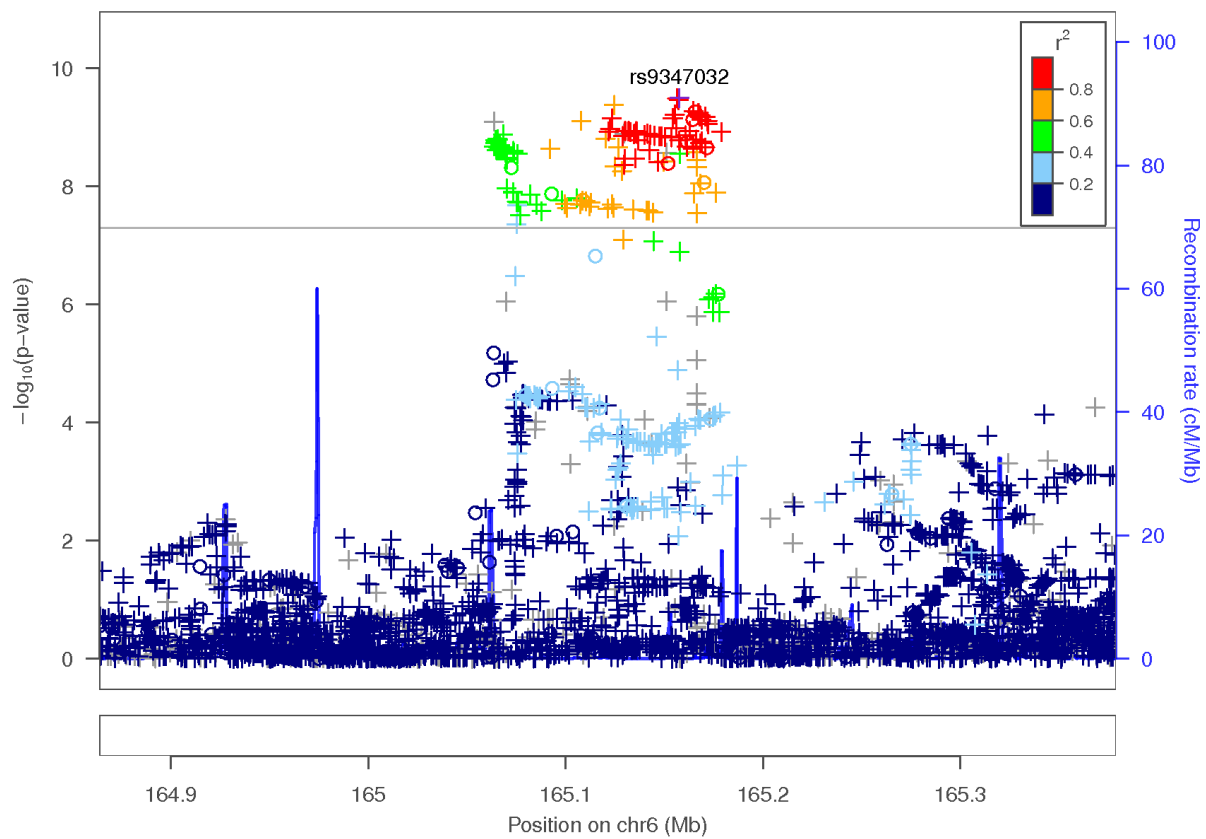

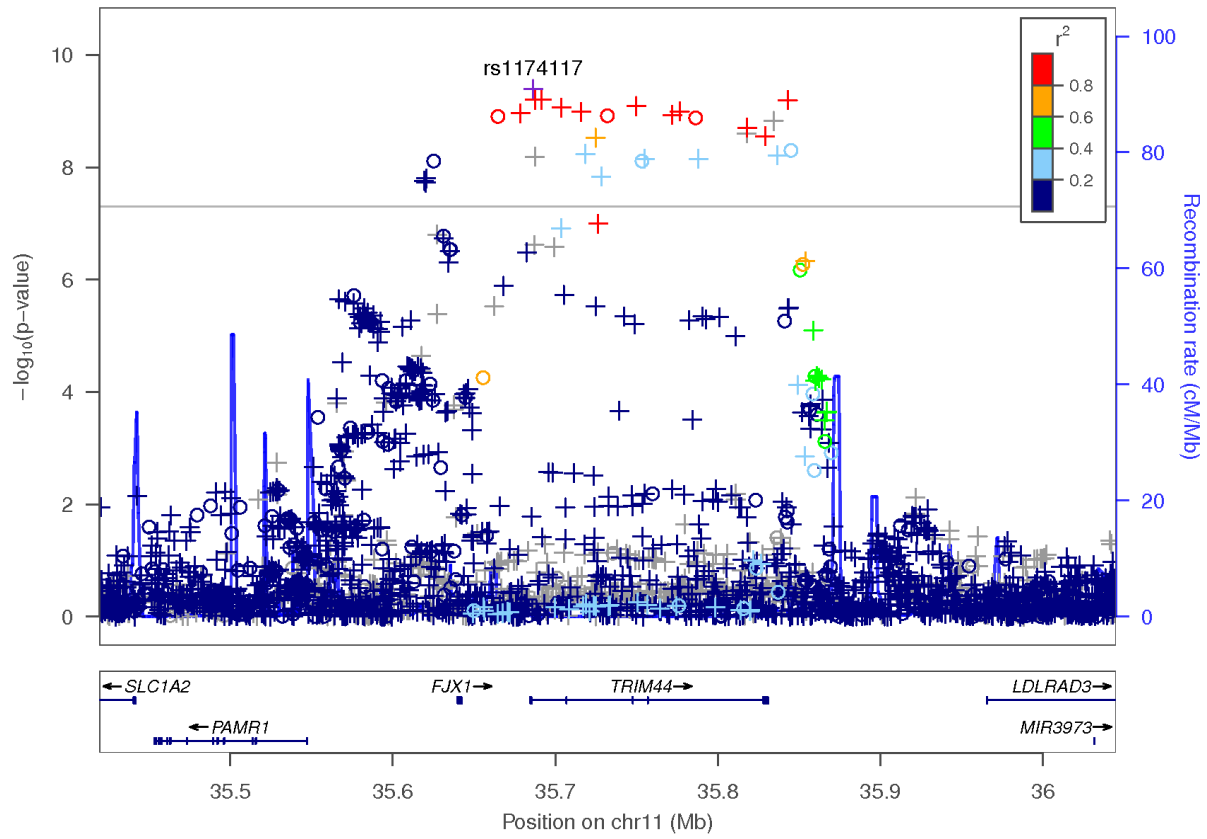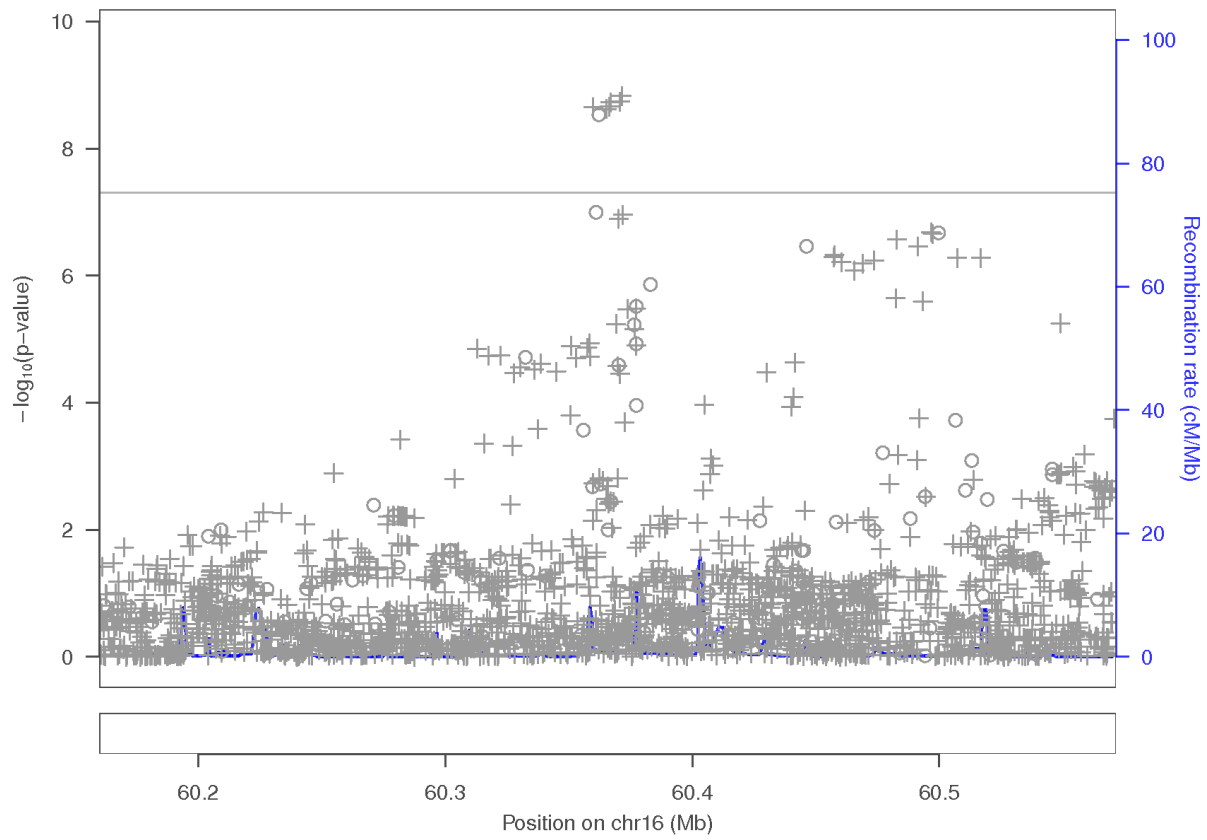

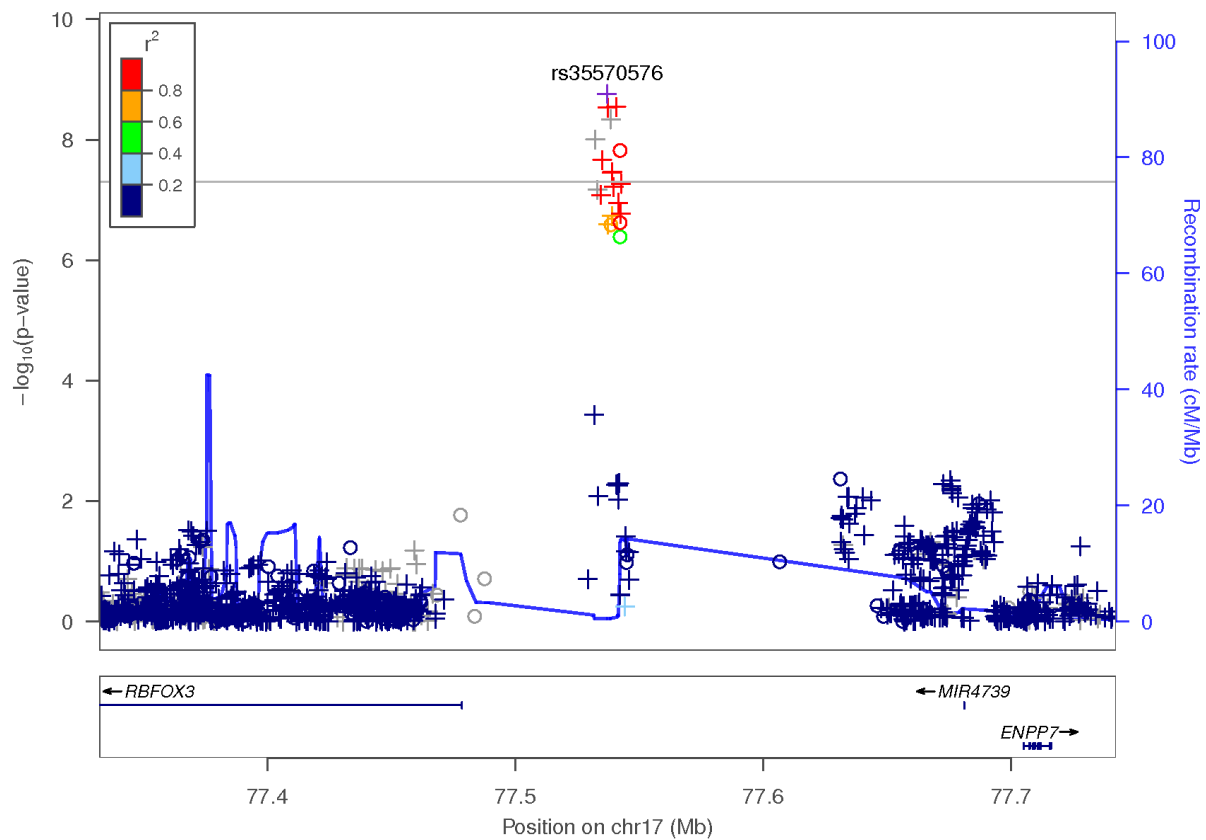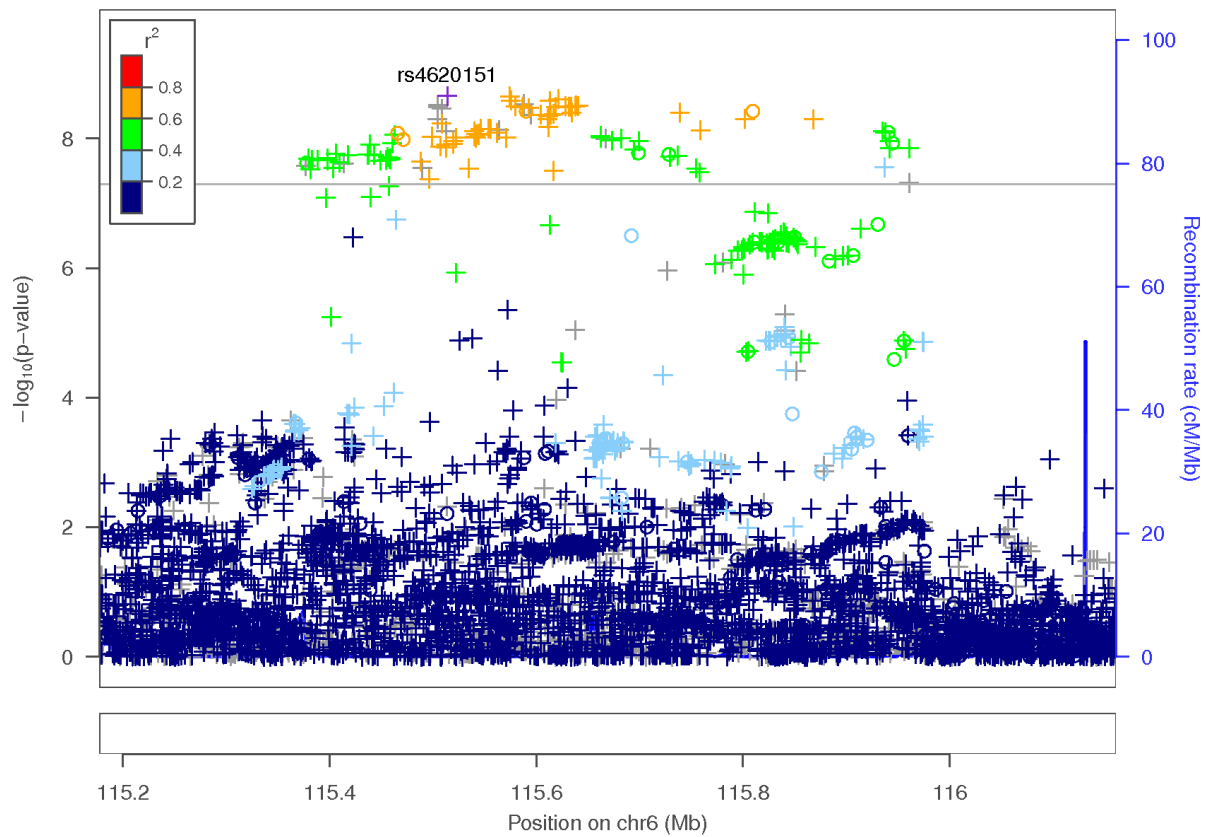



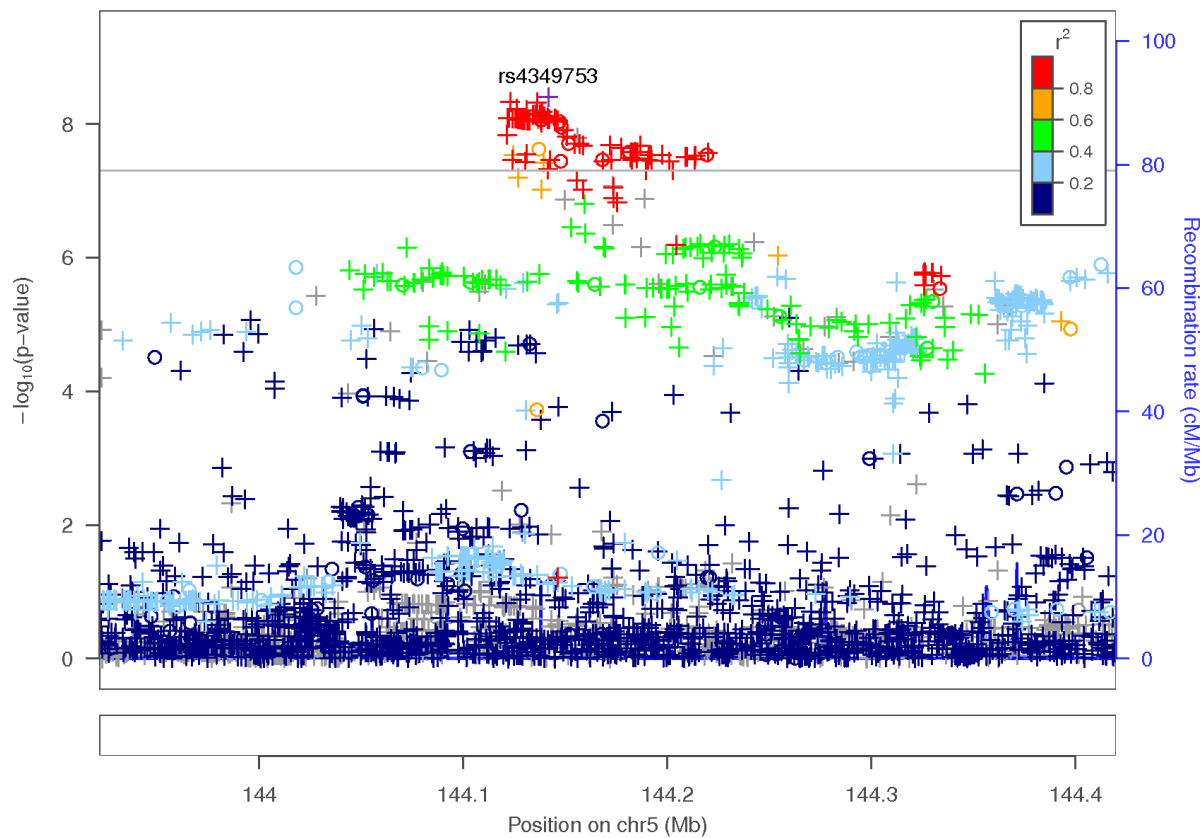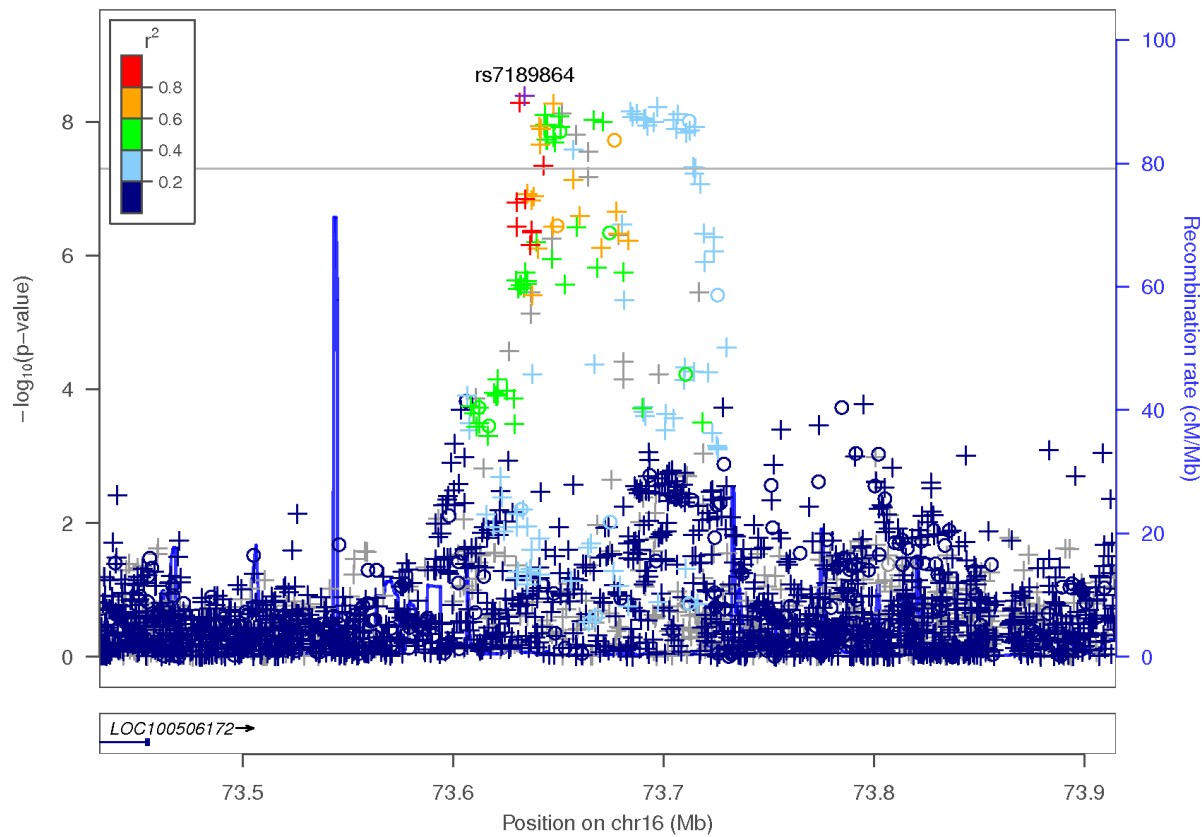

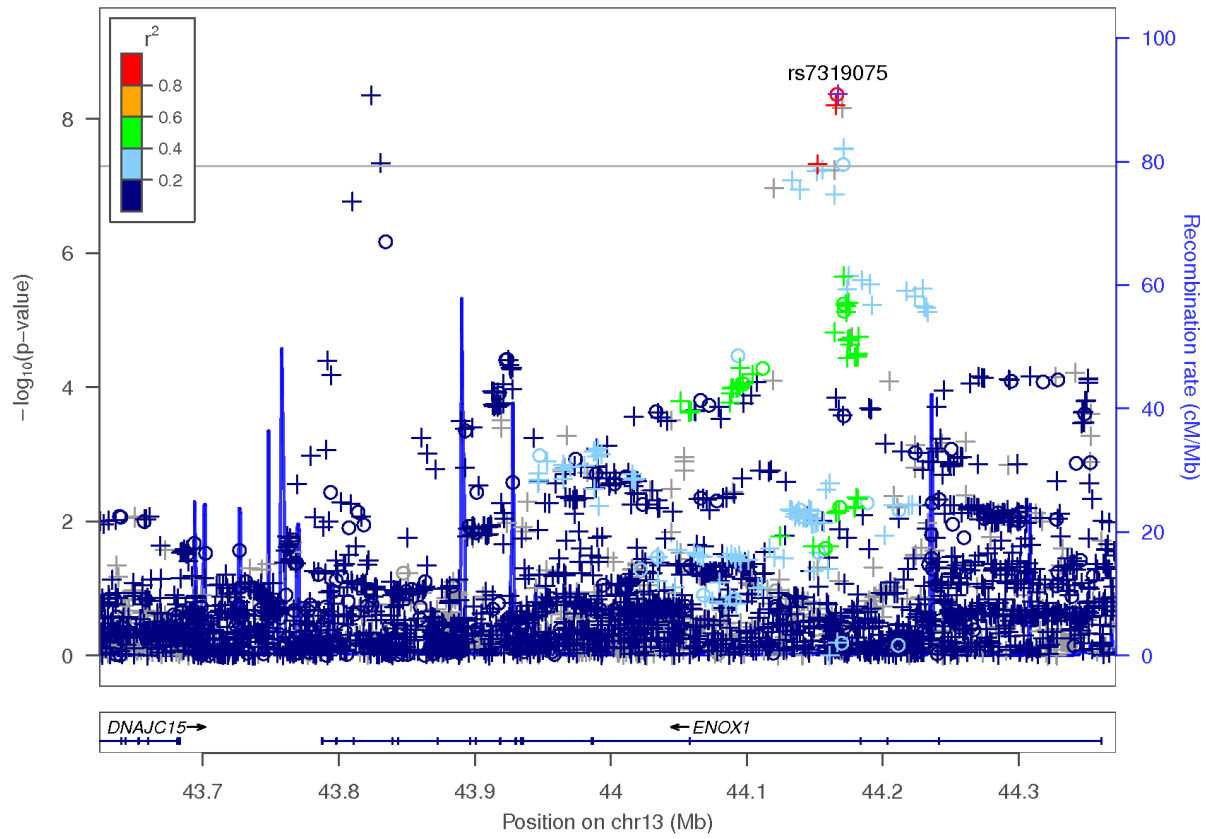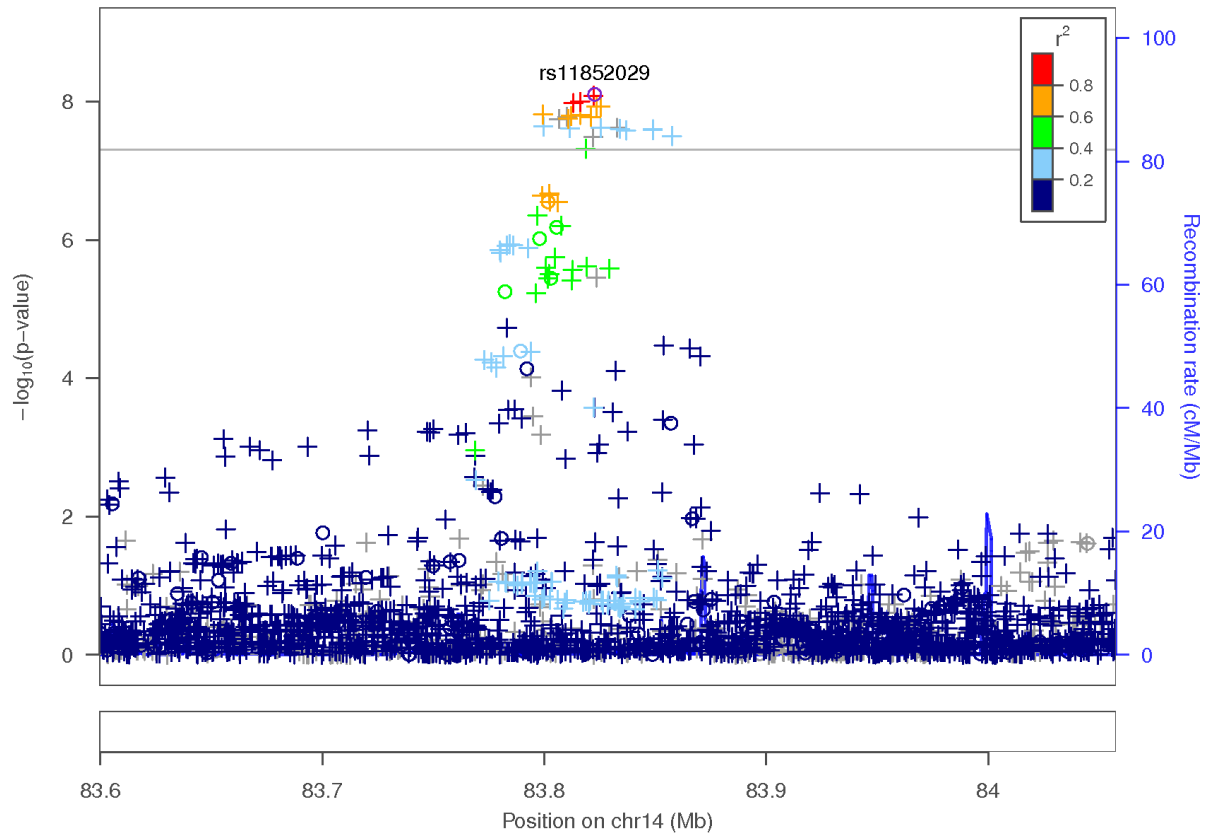

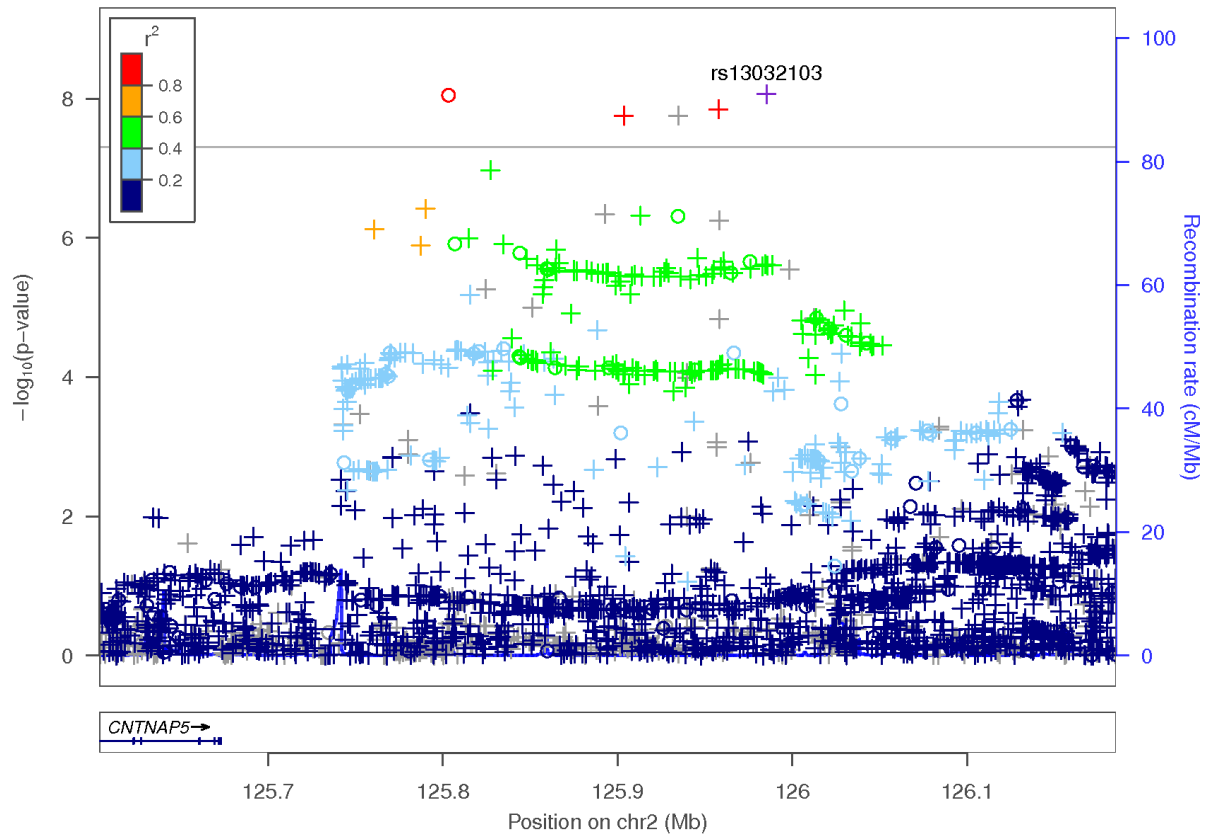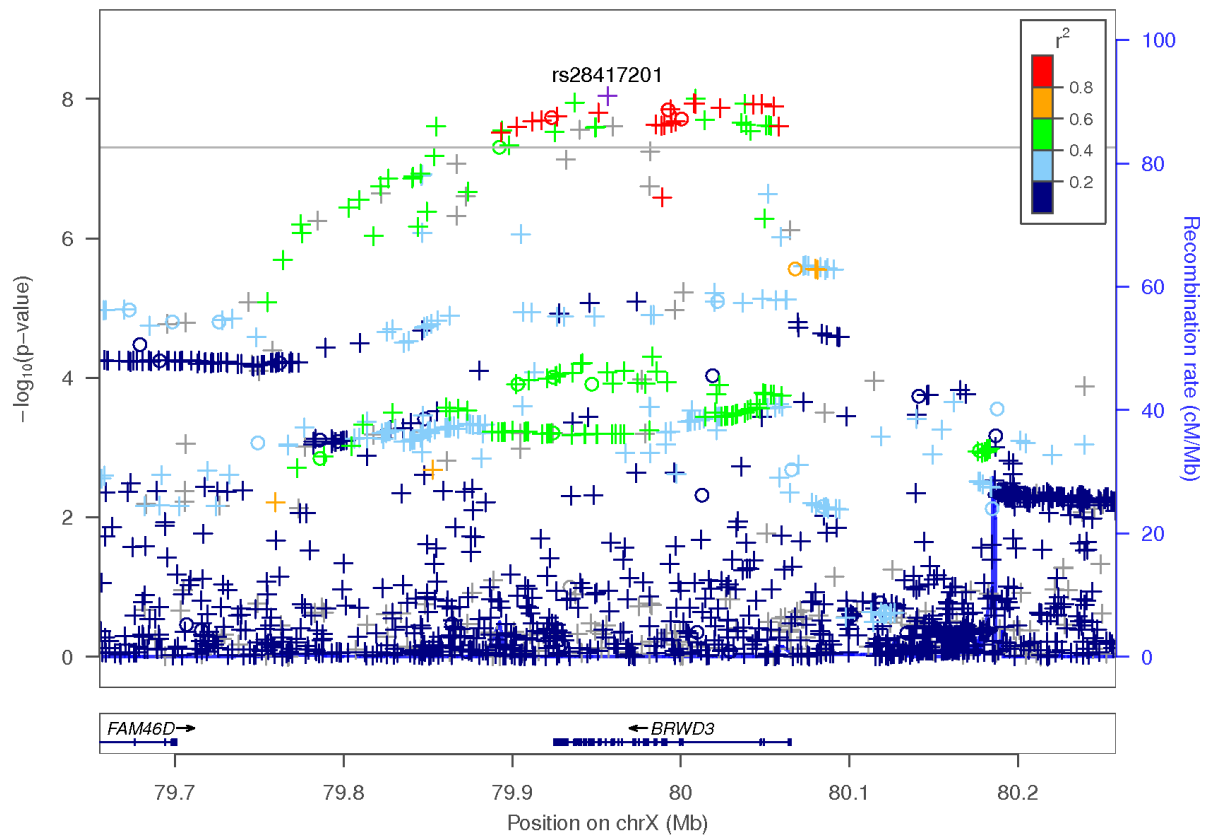

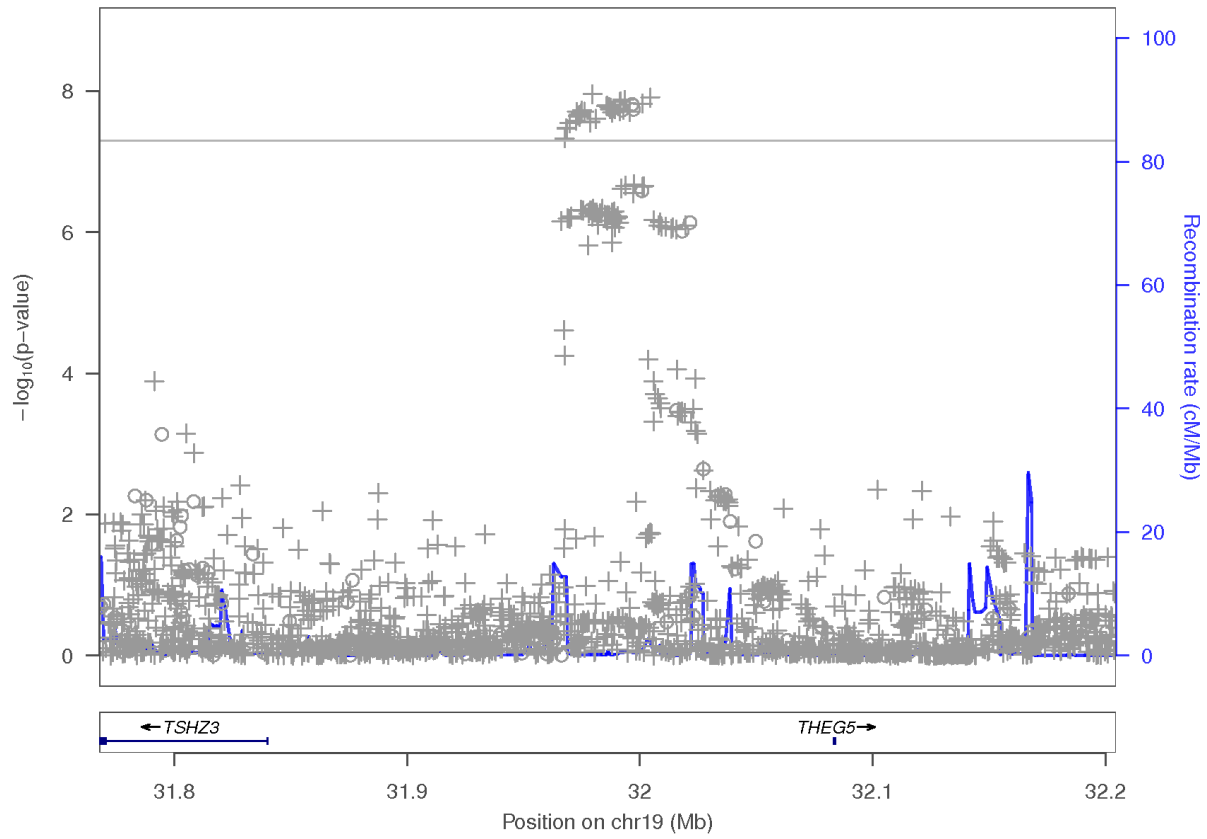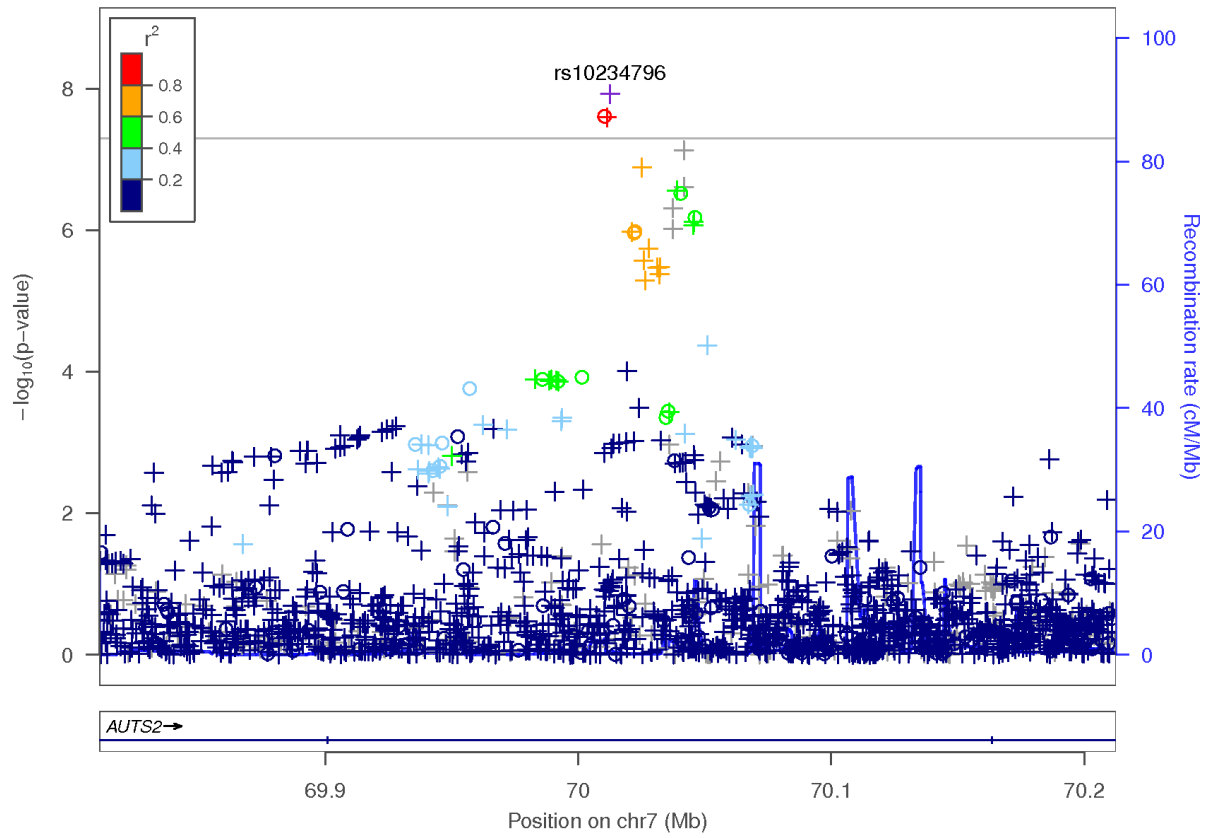

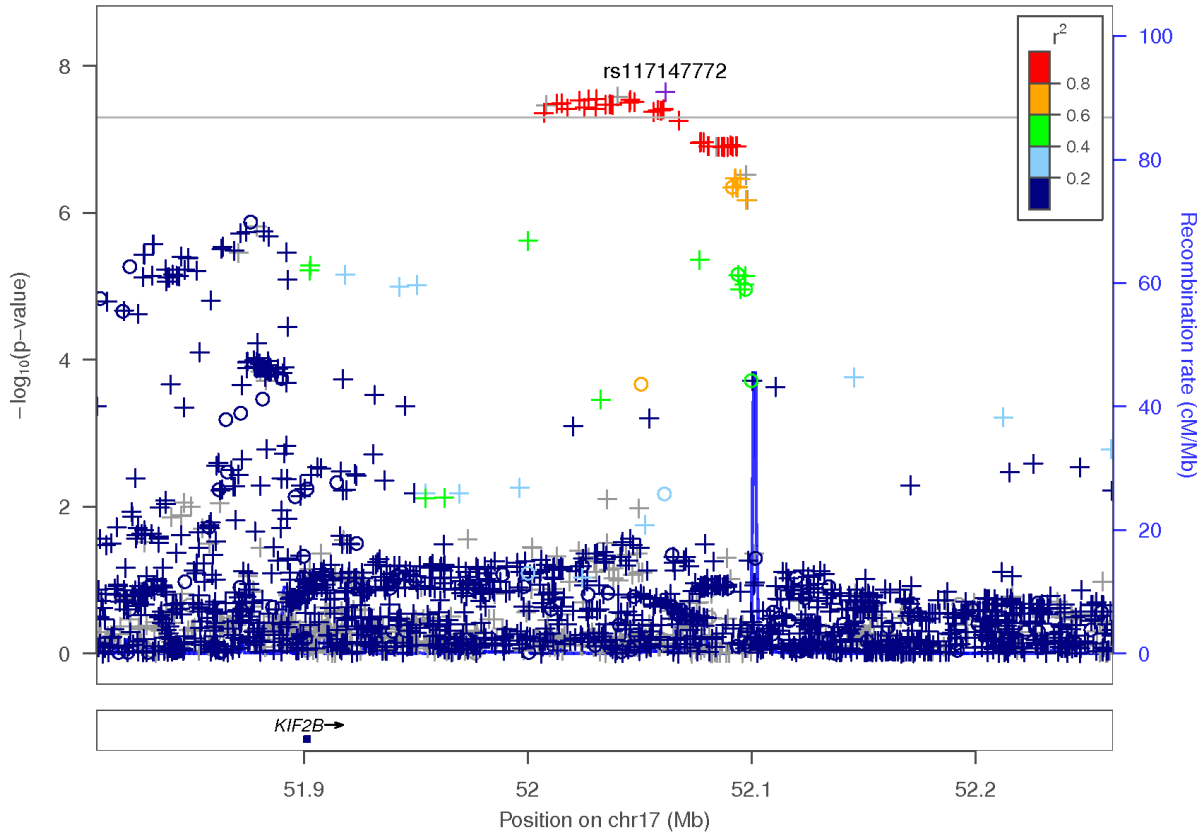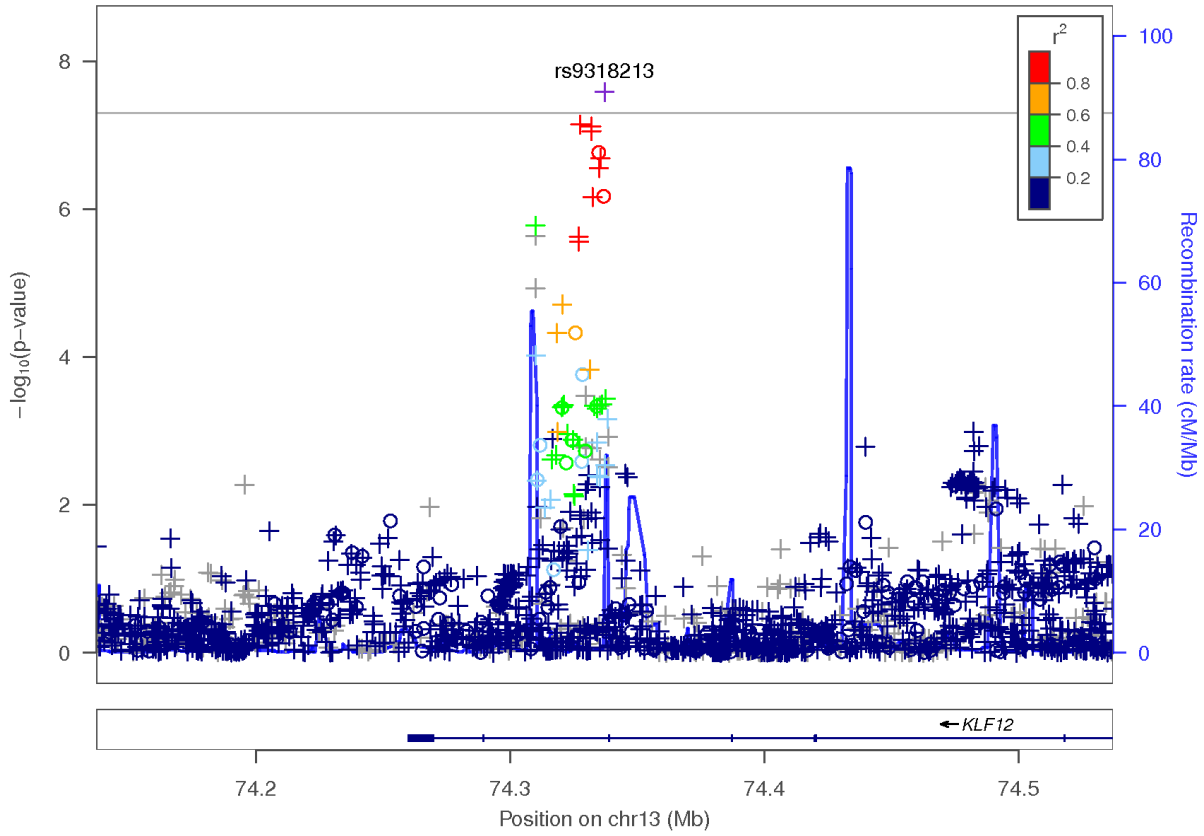

locuszoom plot for 11:92232901:G\_GTA failed

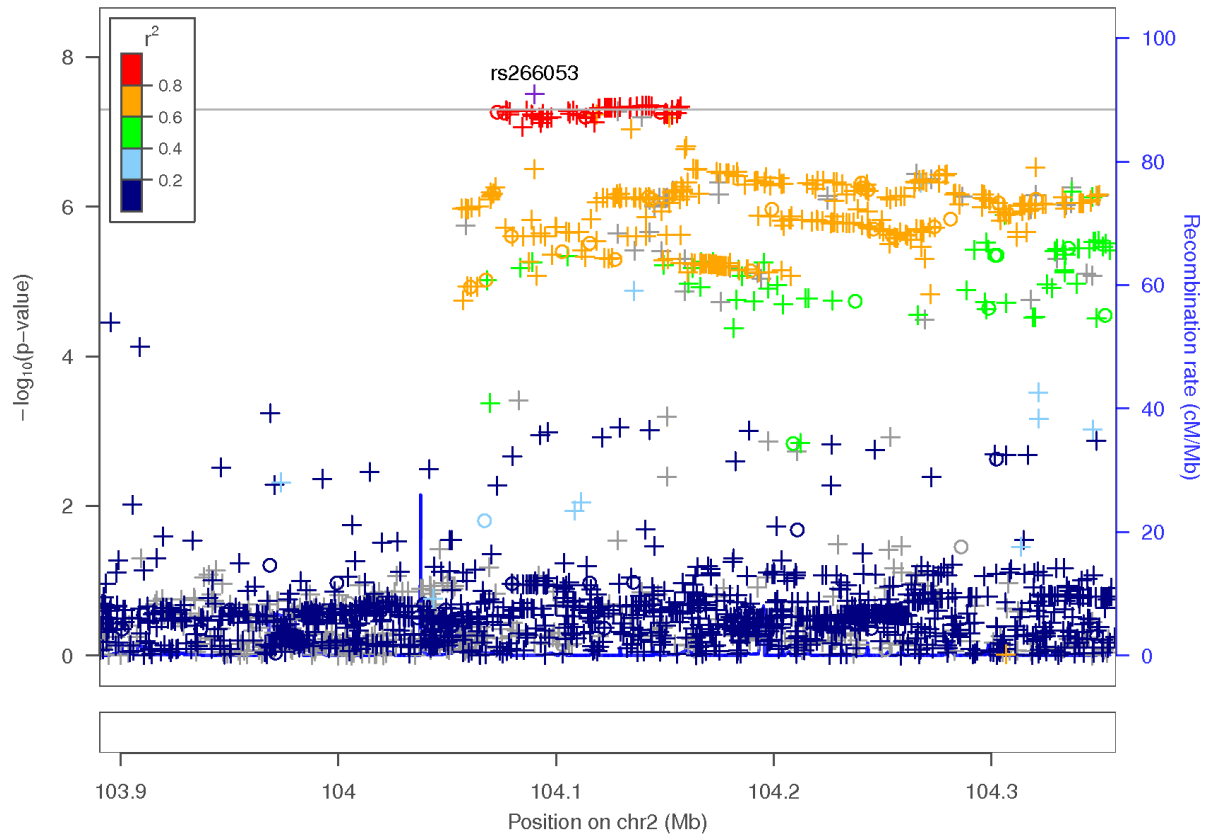

Supplement: NIHMS780506-supplement-15.pdf [file NIHMS780506-supplement-15.pdf]
