# Supplementary material
Source: PubMed Central journal article supplement (PMC5207801)

# Analysis Summary: Tonsillectomy

## Phenotype Description

Data on "tonsillectomy" comes from two sources:

- "Your Medical History" survey:
  - "Have you ever had any of the following surgeries? (Tonsillectomy)" (Yes, No, I don't know)
- Research snippet:
  - "Have you had your tonsils removed?" (Yes, No, I'm not sure)

Cases gave a positive response to either question, and controls gave a negative response to either question. Individuals with discordant responses were excluded.

## Phenotype Statistics

The following table shows demographics of unrelated, European individuals included in the GWAS.

| Phenotype     | Group   | Total  | M     | F     | (0,30] | (30,45] | (45,60] | (60,Inf] |
|---------------|---------|--------|-------|-------|--------|---------|---------|----------|
| tonsillectomy | case    | 60098  | 29487 | 30611 | 3212   | 8715    | 17103   | 31068    |
|               | control | 113323 | 60724 | 52599 | 19679  | 40698   | 29860   | 23086    |

The following table shows the phenotypic distribution across 23andMe genotyping platforms for individuals included in the GWAS.

| Phenotype     | Group   | Total  | v1/v2 | v3    | v4    |
|---------------|---------|--------|-------|-------|-------|
| tonsillectomy | case    | 60098  | 5971  | 45975 | 8152  |
|               | control | 113323 | 9917  | 89122 | 14284 |

## Null Model with Covariates

The following table shows results of fitting a model for the trait based on just the covariates. Principal coordinates have been standardized, so these effect sizes are in units of standard deviations.

|      | Estimate | Std. Error | z value | Pr(> z )              | LRT     | Pr(>Chi)              |
|------|----------|------------|---------|-----------------------|---------|-----------------------|
| age  | 0.0536   | 0.000373   | 143.8   | 0.0                   | 24418.6 | 0.0                   |
| sexF | 0.1229   | 0.010907   | 11.3    | $1.9 \times 10^{-29}$ | 127.0   | $1.9 \times 10^{-29}$ |
| pc.0 | -0.0282  | 0.005345   | -5.3    | $1.4 \times 10^{-7}$  | 27.7    | $1.4 \times 10^{-7}$  |
| pc.1 | -0.0444  | 0.005708   | -7.8    | $7.9 \times 10^{-15}$ | 61.1    | $5.6 \times 10^{-15}$ |
| pc.2 | 0.0270   | 0.005450   | 5.0     | $7.2 \times 10^{-7}$  | 24.5    | $7.4 \times 10^{-7}$  |
| pc.3 | 0.0231   | 0.005478   | 4.2     | $2.4 \times 10^{-5}$  | 17.8    | $2.4 \times 10^{-5}$  |
| pc.4 | 0.0242   | 0.005681   | 4.3     | $2.1 \times 10^{-5}$  | 18.4    | $1.8 \times 10^{-5}$  |

## SNP-level QC information

The following table shows results for QC filters on the genotyped data:

|                         | failed | passed  |
|-------------------------|--------|---------|
| no filters              | 0      | 1030430 |
| not V1-only, chrM, chrY | 4790   | 1025640 |
| parent-offspring test   | 2129   | 1023511 |
| MAF > 0%                | 3203   | 1020494 |
| HWE > 1e-20             | 48225  | 972832  |
| gt.rate > 90%           | 30775  | 952826  |
| batch effects           | 28267  | 945446  |

The following table shows results for QC filters on the imputed dosage data:

|                    | failed | passed   |
|--------------------|--------|----------|
| no filters         | 0      | 13733809 |
| MAF > 0%           | 0      | 13733809 |
| imputation quality | 0      | 13733809 |
| batch effects      | 2168   | 13731641 |

The following table shows results for QC filters on the merged association test results:

|                    | passed   | total    |
|--------------------|----------|----------|
| imputed only       | 12833621 | 12833621 |
| both passed        | 898002   | 13731623 |
| genotyped only     | 47444    | 13779067 |
| no test result     | -6960    | 13772107 |
| failed to converge | -14677   | 13757430 |

## Genetic Association Tests

We performed logistic regression assuming an additive model for allelic effects, using the model:

$$tonsillectomy \sim age + sex + pc.0 + pc.1 + pc.2 + pc.3 + pc.4 + genotype$$

This genome-wide association analysis includes data from 60098 cases and 113323 controls of European ancestry, filtered to remove close relatives.

The results in this report have been adjusted for a genomic control inflation factor  $\lambda=1.103$ . The equivalent inflation factor for 1000 cases and 1000 controls  $\lambda_{1000}=1.001$ , and for 10000,  $\lambda_{10000}=1.013$ .

## Manhattan Plot

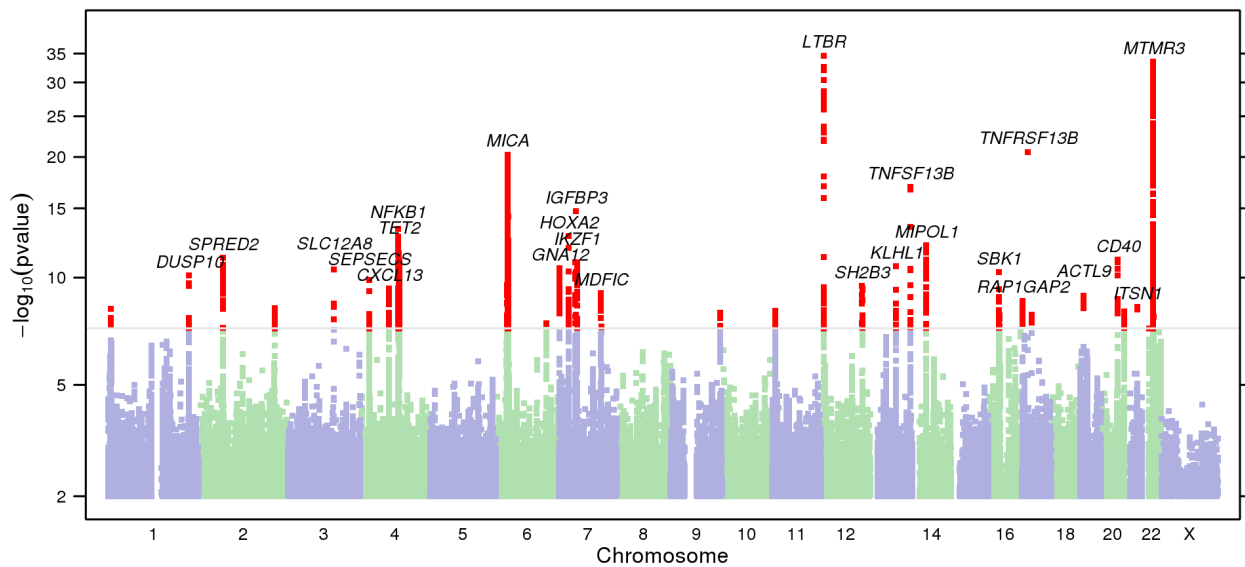

## Q-Q Plot of GWAS Results

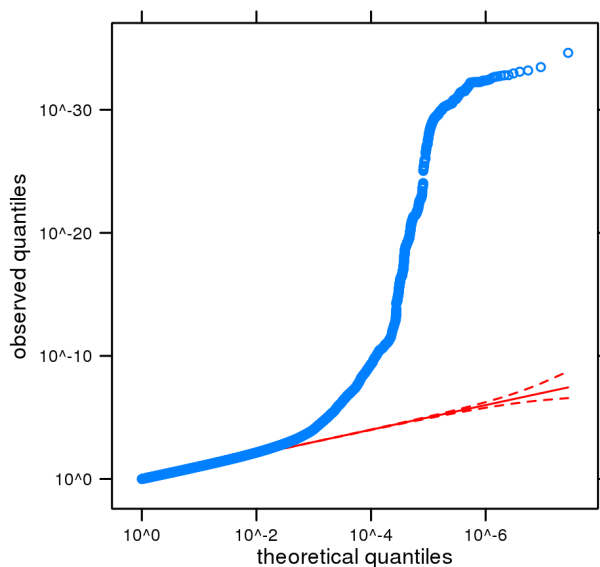

# Index SNPs for Strongest Associations

| cytoband | assay.name  | scaffold | position  | alleles | src | pvalue                | OR    | 95% CI        | gene.context          |
|----------|-------------|----------|-----------|---------|-----|-----------------------|-------|---------------|-----------------------|
| 12p13.31 | rs10849448  | chr12    | 6493351   | A/G     | I   | 2.3×10 <sup>-35</sup> | 0.887 | [0.871,0.904] | [LTBR]                |
| 22q12.2  | rs201112509 | chr22    | 30324654  | D/I     | I   | 3.4×10 <sup>-34</sup> | 1.120 | [1.100,1.141] | [MTMR3]               |
| 17p11.2  | rs34557412  | chr17    | 16852187  | A/G     | I   | 2.7×10 <sup>-21</sup> | 1.595 | [1.449,1.755] | [TNFRSF13B]           |
| 6p21.33  | rs41543314  | chr6     | 31322690  | A/G     | I   | 5.4×10 <sup>-21</sup> | 1.232 | [1.180,1.286] | HLA-C--[ ]--MICA      |
| 13q33.3  | rs200748895 | chr13    | 108960380 | D/I     | I   | 1.2×10 <sup>-17</sup> | 0.794 | [0.753,0.837] | [TNFSF13B]            |
| 7p12.3   | rs80077929  | chr7     | 46094089  | C/T     | I   | 1.7×10 <sup>-15</sup> | 1.111 | [1.083,1.140] | IGFBP3---[ ]          |
| 4q24     | rs230523    | chr4     | 103462038 | C/T     | I   | 4.5×10 <sup>-14</sup> | 1.067 | [1.050,1.086] | [NFKB1]               |
| 7p15.2   | rs6668      | chr7     | 27138183  | C/T     | I   | 1.7×10 <sup>-13</sup> | 1.065 | [1.047,1.083] | HOXA1-[ ]-HOXA2       |
| 14q21.1  | rs148131694 | chr14    | 38025098  | C/T     | I   | 7.8×10 <sup>-13</sup> | 1.066 | [1.047,1.084] | MIPOL1-[ ]--FOXA1     |
| 4q24     | rs1391439   | chr4     | 106151642 | A/G     | I   | 2.8×10 <sup>-12</sup> | 1.060 | [1.043,1.077] | [TET2]                |
| 2p14     | rs201473667 | chr2     | 65562862  | D/I     | I   | 5.4×10 <sup>-12</sup> | 0.945 | [0.930,0.960] | [SPRED2]              |
| 20q13.12 | rs6032664   | chr20    | 44739419  | A/T     | I   | 7.3×10 <sup>-12</sup> | 0.939 | [0.922,0.956] | NCOA5--[ ]-CD40       |
| 7p12.2   | rs876037    | chr7     | 50308692  | A/T     | I   | 1.1×10 <sup>-11</sup> | 1.061 | [1.043,1.079] | C7orf72---[ ]--IKZF1  |
| 13q21.33 | rs9542155   | chr13    | 70579527  | C/T     | I   | 1.9×10 <sup>-11</sup> | 1.060 | [1.042,1.078] | [KLHL1]               |
| 7p22.2   | rs2644312   | chr7     | 2841164   | A/G     | I   | 2.7×10 <sup>-11</sup> | 1.061 | [1.043,1.080] | [GNA12]               |
| 3q21.2   | rs1980080   | chr3     | 124911841 | C/T     | I   | 3.2×10 <sup>-11</sup> | 0.944 | [0.929,0.960] | [SLC12A8]             |
| 16p11.2  | rs141876325 | chr16    | 28330968  | D/I     | I   | 4.7×10 <sup>-11</sup> | 1.063 | [1.044,1.083] | [SBK1]                |
| 1q41     | rs12126292  | chr1     | 222165909 | G/T     | I   | 7.2×10 <sup>-11</sup> | 0.920 | [0.897,0.943] | DUSP10---[ ]--HHIPL2  |
| 4p15.2   | rs10939037  | chr4     | 25114601  | A/G     | I   | 1.4×10 <sup>-10</sup> | 0.948 | [0.933,0.964] | LG12--[ ]-SEPS2       |
| 12q24.12 | rs3184504   | chr12    | 111884608 | C/T     | I   | 3.1×10 <sup>-10</sup> | 1.052 | [1.036,1.069] | [SH2B3]               |
| 4q21.1   | rs7685785   | chr4     | 78440425  | C/T     | I   | 4.5×10 <sup>-10</sup> | 0.919 | [0.895,0.944] | [CXCL13]              |
| 7q31.2   | rs2023703   | chr7     | 114944919 | A/C     | I   | 7.8×10 <sup>-10</sup> | 1.055 | [1.037,1.073] | MDFIC---[ ]--TFEC     |
| 19p13.2  | rs2918308   | chr19    | 8789912   | A/C     | I   | 1.1×10 <sup>-9</sup>  | 0.934 | [0.914,0.955] | ADAMTS10---[ ]--ACTL9 |
| 17p13.3  | rs67968065  | chr17    | 2729247   | D/I     | I   | 2.1×10 <sup>-9</sup>  | 0.951 | [0.936,0.967] | [RAP1GAP2]            |
| 21q22.11 | rs200746495 | chr21    | 35052995  | D/I     | I   | 4.4×10 <sup>-9</sup>  | 0.930 | [0.908,0.953] | [ITSN1]               |
| 2q33.3   | rs1448903   | chr2     | 207308961 | A/G     | I   | 5.1×10 <sup>-9</sup>  | 1.085 | [1.056,1.115] | [ADAM23]              |
| 1p36.23  | rs12068123  | chr1     | 8894346   | A/G     | I   | 5.6×10 <sup>-9</sup>  | 1.049 | [1.032,1.066] | RERE--[ ]--ENO1       |
| 11p15.4  | rs11042055  | chr11    | 8756856   | A/G     | I   | 7.0×10 <sup>-9</sup>  | 0.954 | [0.939,0.969] | [ST5]                 |
| 20q13.33 | rs41278232  | chr20    | 62606617  | A/G     | I   | 7.5×10 <sup>-9</sup>  | 1.078 | [1.051,1.107] | [SAMD10]              |
| 9q34.2   | rs635634    | chr9     | 136155000 | C/T     | I   | 8.5×10 <sup>-9</sup>  | 1.060 | [1.039,1.081] | ABO-[ ]--SURF6        |
| 17q11.2  | rs62066768  | chr17    | 26858395  | A/G     | I   | 1.1×10 <sup>-8</sup>  | 0.918 | [0.892,0.946] | [FOXN1]               |
| 6q23.3   | rs11757201  | chr6     | 138003822 | C/G     | I   | 3.0×10 <sup>-8</sup>  | 0.946 | [0.928,0.965] | OLIG3---[ ]--TNFAIP3  |
| 6p21.31  | rs201220830 | chr6     | 34195176  | D/I     | I   | 3.6×10 <sup>-8</sup>  | 0.898 | [0.864,0.933] | GRM4--[ ]-HMGA1       |
| 16p11.2  | rs12931792  | chr16    | 30156398  | A/G     | I   | 4.1×10 <sup>-8</sup>  | 1.057 | [1.036,1.078] | MAPK3--[ ]--CORO1A    |
| 7q31.2   | rs200608253 | chr7     | 116917244 | D/I     | I   | 4.1×10 <sup>-8</sup>  | 1.046 | [1.029,1.063] | [WNT2]                |
| 22q11.21 | rs41298830  | chr22    | 19752943  | A/C     | I   | 5.0×10 <sup>-8</sup>  | 0.947 | [0.929,0.966] | [TBX1]                |

# Quality Statistics for Index SNPs

| assay.name  | is.v2 | is.v3 | is.v4 | gt.rate | hw.p.value           | p.date               | freq.b | avg.rsqr | min.rsqr | p.batch               | dose.b | qc.mask |
|-------------|-------|-------|-------|---------|----------------------|----------------------|--------|----------|----------|-----------------------|--------|---------|
| rs10849448  | FALSE | FALSE | FALSE |         |                      |                      |        | 0.9282   | 0.8265   | 0.30                  | 0.7459 | v2v3v4  |
| rs201112509 | FALSE | FALSE | FALSE |         |                      |                      |        | 0.8998   | 0.8838   | 0.54                  | 0.6935 | v2v3v4  |
| rs34557412  | TRUE  | FALSE | FALSE | 0.9989  | 0.068                | 0.99                 | 0.0048 | 0.7503   | 0.6731   | 9.3×10 <sup>-19</sup> | 0.0084 | v2v3v4  |
| rs41543314  | FALSE | FALSE | TRUE  | 0.9921  | 0.0                  | 1.1×10 <sup>-9</sup> | 0.0424 | 0.9403   | 0.8812   | 0.00035               | 0.0348 | v2v3v4  |
| rs200748895 | FALSE | FALSE | FALSE |         |                      |                      |        | 0.6785   | 0.5925   | 0.41                  | 0.9659 | v2v3v4  |
| rs80077929  | FALSE | FALSE | FALSE |         |                      |                      |        | 0.8963   | 0.8625   | 0.33                  | 0.1138 | v2v3v4  |
| rs230523    | FALSE | FALSE | FALSE |         |                      |                      |        | 0.9814   | 0.9796   | 0.17                  | 0.6662 | v2v3v4  |
| rs6668      | FALSE | TRUE  | FALSE | 0.9973  | 0.41                 | 0.0093               | 0.3746 | 0.9586   | 0.8507   | 1.3×10 <sup>-6</sup>  | 0.3719 | v2v3v4  |
| rs148131694 | FALSE | FALSE | FALSE |         |                      |                      |        | 0.8357   | 0.8296   | 0.048                 | 0.4427 | v2v3v4  |
| rs1391439   | FALSE | FALSE | FALSE |         |                      |                      |        | 0.9991   | 0.9983   | 5.1×10 <sup>-7</sup>  | 0.3980 | v2v3v4  |
| rs201473667 | FALSE | FALSE | FALSE |         |                      |                      |        | 0.9770   | 0.9667   | 0.91                  | 0.5318 | v2v3v4  |
| rs6032664   | FALSE | FALSE | FALSE |         |                      |                      |        | 0.9996   | 0.9992   | 0.64                  | 0.7400 | v2v3v4  |
| rs876037    | FALSE | FALSE | FALSE |         |                      |                      |        | 0.9974   | 0.9930   | 0.98                  | 0.6789 | v2v3v4  |
| rs9542155   | FALSE | FALSE | FALSE |         |                      |                      |        | 0.9991   | 0.9941   | 0.42                  | 0.3187 | v2v3v4  |
| rs2644312   | FALSE | FALSE | FALSE |         |                      |                      |        | 0.9949   | 0.9921   | 0.014                 | 0.7107 | v2v3v4  |
| rs1980080   | TRUE  | TRUE  | TRUE  | 0.9998  | 0.70                 | 0.24                 | 0.6715 | 0.9998   | 0.9996   | 0.57                  | 0.6703 | v2v3v4  |
| rs141876325 | FALSE | FALSE | FALSE |         |                      |                      |        | 0.9325   | 0.7660   | 1.9×10 <sup>-33</sup> | 0.2824 | v2v3v4  |
| rs12126292  | FALSE | FALSE | FALSE |         |                      |                      |        | 0.9064   | 0.8847   | 0.94                  | 0.8767 | v2v3v4  |
| rs10939037  | FALSE | FALSE | FALSE |         |                      |                      |        | 0.9664   | 0.8961   | 2.8×10 <sup>-6</sup>  | 0.4377 | v2v3v4  |
| rs3184504   | TRUE  | TRUE  | TRUE  | 0.9998  | 2.4×10 <sup>-5</sup> | 0.00017              | 0.4996 | 0.9993   | 0.9985   | 0.30                  | 0.4984 | v2v3v4  |
| rs7685785   | FALSE | FALSE | FALSE |         |                      |                      |        | 0.9704   | 0.8725   | 2.0×10 <sup>-10</sup> | 0.1051 | v2v3v4  |
| rs2023703   | FALSE | FALSE | FALSE |         |                      |                      |        | 0.9884   | 0.9779   | 0.0030                | 0.3254 | v2v3v4  |
| rs2918308   | FALSE | FALSE | FALSE |         |                      |                      |        | 0.9994   | 0.9936   | 0.83                  | 0.1576 | v2v3v4  |
| rs67968065  | FALSE | FALSE | FALSE |         |                      |                      |        | 0.9500   | 0.9371   | 0.94                  | 0.4760 | v2v3v4  |
| rs200746495 | FALSE | FALSE | FALSE |         |                      |                      |        | 0.9530   | 0.9479   | 0.33                  | 0.1322 | v2v3v4  |
| rs1448903   | TRUE  | TRUE  | TRUE  | 0.9992  | 0.15                 | 0.067                | 0.0904 | 0.9993   | 0.9965   | 0.25                  | 0.0911 | v2v3v4  |
| rs12068123  | FALSE | FALSE | FALSE |         |                      |                      |        | 0.9780   | 0.9695   | 3.8×10 <sup>-9</sup>  | 0.4544 | v2v3v4  |
| rs11042055  | TRUE  | TRUE  | TRUE  | 0.9983  | 1.6×10 <sup>-7</sup> | 0.53                 | 0.5682 | 0.9999   | 0.9997   | 0.00059               | 0.5716 | v2v3v4  |
| rs41278232  | FALSE | FALSE | FALSE |         |                      |                      |        | 0.9714   | 0.8892   | 0.67                  | 0.8888 | v2v3v4  |
| rs635634    | FALSE | FALSE | FALSE |         |                      |                      |        | 0.9997   | 0.9990   | 0.73                  | 0.1976 | v2v3v4  |
| rs62066768  | FALSE | FALSE | FALSE |         |                      |                      |        | 0.9621   | 0.9290   | 0.13                  | 0.9178 | v2v3v4  |
| rs11757201  | FALSE | FALSE | FALSE |         |                      |                      |        | 0.9991   | 0.9980   | 0.011                 | 0.7962 | v2v3v4  |
| rs201220830 | FALSE | FALSE | FALSE |         |                      |                      |        | 0.9026   | 0.7062   | 0.30                  | 0.9522 | v2v3v4  |
| rs12931792  | FALSE | FALSE | FALSE |         |                      |                      |        | 0.8560   | 0.8504   | 0.00010               | 0.5423 | v3      |
| rs200608253 | FALSE | FALSE | FALSE |         |                      |                      |        | 0.9823   | 0.9279   | 0.31                  | 0.5247 | v2v3v4  |
| rs41298830  | FALSE | FALSE | FALSE |         |                      |                      |        | 0.9368   | 0.9052   | 0.031                 | 0.2309 | v2v3v4  |

# SNP Statistics in the GWAS Sample

| assay.name  | AA.0  | AB.0  | BB.0  | im.num.0 | dose.b.0 | AA.1  | AB.1  | BB.1  | im.num.1 | dose.b.1 |
|-------------|-------|-------|-------|----------|----------|-------|-------|-------|----------|----------|
| rs10849448  |       |       |       | 113323   | 0.7547   |       |       |       | 60098    | 0.7347   |
| rs201112509 |       |       |       | 113323   | 0.6909   |       |       |       | 60098    | 0.7083   |
| rs34557412  | 11833 | 93    | 0     | 113323   | 0.0076   | 7255  | 92    | 3     | 60098    | 0.0103   |
| rs41543314  | 13296 | 627   | 240   | 113323   | 0.0332   | 7459  | 418   | 193   | 60098    | 0.0397   |
| rs200748895 |       |       |       | 113323   | 0.9682   |       |       |       | 60098    | 0.9634   |
| rs80077929  |       |       |       | 113323   | 0.1117   |       |       |       | 60098    | 0.1214   |
| rs230523    |       |       |       | 113323   | 0.6608   |       |       |       | 60098    | 0.6720   |
| rs6668      | 35564 | 41202 | 12100 | 113323   | 0.3662   | 17509 | 21558 | 6779  | 60098    | 0.3797   |
| rs148131694 |       |       |       | 113323   | 0.4393   |       |       |       | 60098    | 0.4511   |
| rs1391439   |       |       |       | 113323   | 0.3884   |       |       |       | 60098    | 0.3997   |
| rs201473667 |       |       |       | 113323   | 0.5337   |       |       |       | 60098    | 0.5215   |
| rs6032664   |       |       |       | 113323   | 0.7457   |       |       |       | 60098    | 0.7356   |
| rs876037    |       |       |       | 113323   | 0.6766   |       |       |       | 60098    | 0.6884   |
| rs9542155   |       |       |       | 113323   | 0.3143   |       |       |       | 60098    | 0.3235   |
| rs2644312   |       |       |       | 113323   | 0.7043   |       |       |       | 60098    | 0.7155   |
| rs1980080   | 11842 | 49717 | 51749 | 113323   | 0.6761   | 6677  | 26722 | 26691 | 60098    | 0.6665   |
| rs141876325 |       |       |       | 113323   | 0.2800   |       |       |       | 60098    | 0.2889   |
| rs12126292  |       |       |       | 113323   | 0.8793   |       |       |       | 60098    | 0.8731   |
| rs10939037  |       |       |       | 113323   | 0.4455   |       |       |       | 60098    | 0.4337   |
| rs3184504   | 29079 | 56319 | 27910 | 113323   | 0.4951   | 14663 | 29853 | 15565 | 60098    | 0.5078   |
| rs7685785   |       |       |       | 113323   | 0.1065   |       |       |       | 60098    | 0.1001   |
| rs2023703   |       |       |       | 113323   | 0.3204   |       |       |       | 60098    | 0.3306   |
| rs2918308   |       |       |       | 113323   | 0.1604   |       |       |       | 60098    | 0.1527   |
| rs67968065  |       |       |       | 113323   | 0.4798   |       |       |       | 60098    | 0.4704   |
| rs200746495 |       |       |       | 113323   | 0.1346   |       |       |       | 60098    | 0.1284   |
| rs1448903   | 93967 | 18371 | 888   | 113323   | 0.0892   | 49100 | 10361 | 564   | 60098    | 0.0960   |
| rs12068123  |       |       |       | 113323   | 0.4445   |       |       |       | 60098    | 0.4570   |
| rs11042055  | 21368 | 55011 | 36764 | 113323   | 0.5679   | 11828 | 29369 | 18803 | 60098    | 0.5580   |
| rs41278232  |       |       |       | 113323   | 0.8861   |       |       |       | 60098    | 0.8929   |
| rs635634    |       |       |       | 113323   | 0.1957   |       |       |       | 60098    | 0.2036   |
| rs62066768  |       |       |       | 113323   | 0.9193   |       |       |       | 60098    | 0.9139   |
| rs11757201  |       |       |       | 113323   | 0.7968   |       |       |       | 60098    | 0.7887   |
| rs201220830 |       |       |       | 113323   | 0.9533   |       |       |       | 60098    | 0.9491   |
| rs12931792  |       |       |       | 88447    | 0.5410   |       |       |       | 45608    | 0.5503   |
| rs200608253 |       |       |       | 113323   | 0.5210   |       |       |       | 60098    | 0.5296   |
| rs41298830  |       |       |       | 113323   | 0.2315   |       |       |       | 60098    | 0.2238   |

## Annotations from NHGRI GWAS Catalog

The following table shows, for each index SNP, all entries in the NHGRI GWAS Catalog that are within 500kb and in at least moderate linkage disequilibrium ( $r^2 > 0.5$ ).

| region   | position  | our.name    | our.pval              | dist    | rsqr  | assay.name | pvalue                | pubmed.id | trait                                      | genes              |
|----------|-----------|-------------|-----------------------|---------|-------|------------|-----------------------|-----------|--------------------------------------------|--------------------|
| 22q12.2  | 30324654  | rs201112509 | $3.4 \times 10^{-34}$ | 12932   | 0.785 | rs36600    | $6.0 \times 10^{-13}$ | 21725308  | Lung cancer                                | MTMR3              |
| 22q12.2  | 30324654  | rs201112509 | $3.4 \times 10^{-34}$ | 98806   | 0.589 | rs12537    | $1.0 \times 10^{-11}$ | 22197929  | IgA nephropathy                            | MTMR3              |
| 6p21.33  | 31322690  | rs41543314  | $5.4 \times 10^{-21}$ | 109090  | 0.948 | rs2395029  | $1.0 \times 10^{-25}$ | 21051598  | HIV-1 control                              | HLA-B              |
| 6p21.33  | 31322690  | rs41543314  | $5.4 \times 10^{-21}$ | 109090  | 0.948 | rs2395029  | $5.0 \times 10^{-35}$ | 20041166  | HIV-1 control                              | HCP5, HLA-B        |
| 6p21.33  | 31322690  | rs41543314  | $5.4 \times 10^{-21}$ | 109090  | 0.948 | rs2395029  | $9.0 \times 10^{-33}$ | 19483685  | Drug-induced liver injury (flucloxacillin) | HCP5, HLA-B        |
| 6p21.33  | 31322690  | rs41543314  | $5.4 \times 10^{-21}$ | 109090  | 0.948 | rs2395029  | $3.0 \times 10^{-19}$ | 19115949  | AIDS progression                           | HCP5, MICB, ...    |
| 6p21.33  | 31322690  | rs41543314  | $5.4 \times 10^{-21}$ | 109090  | 0.948 | rs2395029  | $2.0 \times 10^{-26}$ | 18369459  | Psoriasis                                  | HLA-C              |
| 4q24     | 103462038 | rs230523    | $4.5 \times 10^{-14}$ | -4620   | 0.740 | rs230529   | $2.0 \times 10^{-7}$  | 22479419  | Schizophrenia (treatment refractory)       | NFKB1              |
| 4q24     | 103462038 | rs230523    | $4.5 \times 10^{-14}$ | 49076   | 0.912 | rs3774959  | $4.0 \times 10^{-12}$ | 23128233  | Ulcerative colitis                         | NFKB1,MANBA        |
| 4q24     | 106151642 | rs1391439   | $2.8 \times 10^{-12}$ | -90108  | 0.854 | rs7679673  | $3.0 \times 10^{-14}$ | 19767753  | Prostate cancer                            | TET2               |
| 2p14     | 65562862  | rs201473667 | $5.4 \times 10^{-12}$ | 32724   | 0.903 | rs934734   | $5.0 \times 10^{-10}$ | 20453842  | Rheumatoid arthritis                       | SPRED2             |
| 2p14     | 65562862  | rs201473667 | $5.4 \times 10^{-12}$ | 46047   | 0.738 | rs1876518  | $2.0 \times 10^{-8}$  | 21383967  | Celiac disease and Rheumatoid arthritis    | SPRED2             |
| 20q13.12 | 44739419  | rs6032664   | $7.3 \times 10^{-12}$ | -37299  | 0.679 | rs2425752  | $5.0 \times 10^{-10}$ | 21833088  | Multiple sclerosis                         | NCOA5, CD40        |
| 20q13.12 | 44739419  | rs6032664   | $7.3 \times 10^{-12}$ | 777     | 0.973 | rs6074022  | $5.0 \times 10^{-6}$  | 22190364  | Multiple sclerosis                         | CD40               |
| 20q13.12 | 44739419  | rs6032664   | $7.3 \times 10^{-12}$ | 777     | 0.973 | rs6074022  | $1.0 \times 10^{-7}$  | 19525955  | Multiple sclerosis                         | CD40               |
| 20q13.12 | 44739419  | rs6032664   | $7.3 \times 10^{-12}$ | 2645    | 1.000 | rs1569723  | $1.0 \times 10^{-13}$ | 23128233  | Inflammatory bowel disease                 | CD40,MMP9,PLTP     |
| 20q13.12 | 44739419  | rs6032664   | $7.3 \times 10^{-12}$ | 2645    | 1.000 | rs1569723  | $6.0 \times 10^{-9}$  | 22446961  | Kawasaki disease                           | CD40               |
| 20q13.12 | 44739419  | rs6032664   | $7.3 \times 10^{-12}$ | 8528    | 0.993 | rs4810485  | $3.0 \times 10^{-9}$  | 20453842  | Rheumatoid arthritis                       | CD40               |
| 20q13.12 | 44739419  | rs6032664   | $7.3 \times 10^{-12}$ | 8528    | 0.993 | rs4810485  | $8.0 \times 10^{-9}$  | 18794853  | Rheumatoid arthritis                       | CD40               |
| 7p12.2   | 50308692  | rs876037    | $1.1 \times 10^{-11}$ | -2829   | 0.994 | rs4917014  | $3.0 \times 10^{-23}$ | 19838193  | Systemic lupus erythematosus               | IKZF1              |
| 7p22.2   | 2841164   | rs2644312   | $2.7 \times 10^{-11}$ | -81369  | 0.832 | rs798554   | $4.0 \times 10^{-23}$ | 23563607  | Height                                     | AMZ1               |
| 7p22.2   | 2841164   | rs2644312   | $2.7 \times 10^{-11}$ | -78062  | 0.825 | rs798544   | $7.0 \times 10^{-15}$ | 18391951  | Height                                     | GNA12              |
| 7p22.2   | 2841164   | rs2644312   | $2.7 \times 10^{-11}$ | -51284  | 0.921 | rs798502   | $6.0 \times 10^{-17}$ | 23128233  | Ulcerative colitis                         | CARD11,GNA12,TTYH3 |
| 7p22.2   | 2841164   | rs2644312   | $2.7 \times 10^{-11}$ | -51284  | 0.921 | rs798502   | $3.0 \times 10^{-15}$ | 21297633  | Ulcerative colitis                         | GNA12              |
| 7p22.2   | 2841164   | rs2644312   | $2.7 \times 10^{-11}$ | -45207  | 0.951 | rs798497   | $7.0 \times 10^{-7}$  | 20189936  | Height                                     | GNA12              |
| 7p22.2   | 2841164   | rs2644312   | $2.7 \times 10^{-11}$ | -39361  | 0.880 | rs798489   | $2.0 \times 10^{-33}$ | 20881960  | Height                                     | GNA12              |
| 7p22.2   | 2841164   | rs2644312   | $2.7 \times 10^{-11}$ | 28821   | 0.975 | rs1182188  | $3.0 \times 10^{-9}$  | 19343178  | Height                                     | GNA12              |
| 12q24.12 | 111884608 | rs3184504   | $3.1 \times 10^{-10}$ | -176150 | 0.575 | rs1265564  | $1.0 \times 10^{-16}$ | 22293688  | Type 1 diabetes                            | CUX2               |
| 12q24.12 | 111884608 | rs3184504   | $3.1 \times 10^{-10}$ | 0       | 1.000 | rs3184504  | $5.0 \times 10^{-11}$ | 24026423  | Platelet counts                            | SH2B3, ATXN2       |
| 12q24.12 | 111884608 | rs3184504   | $3.1 \times 10^{-10}$ | 0       | 1.000 | rs3184504  | $3.0 \times 10^{-8}$  | 23417110  | Beta-2 microglubulin plasma levels         | SH2B3, ATXN2       |
| 12q24.12 | 111884608 | rs3184504   | $3.1 \times 10^{-10}$ | 0       | 1.000 | rs3184504  | $4.0 \times 10^{-19}$ | 23222517  | Red blood cell traits                      | SH2B3, ATXN2       |
| 12q24.12 | 111884608 | rs3184504   | $3.1 \times 10^{-10}$ | 0       | 1.000 | rs3184504  | $3.0 \times 10^{-12}$ | 22493691  | Hypothyroidism                             | SH2B3, ATXN2, ...  |
| 12q24.12 | 111884608 | rs3184504   | $3.1 \times 10^{-10}$ | 0       | 1.000 | rs3184504  | $1.0 \times 10^{-26}$ | 22139419  | Platelet counts                            | SH2B3              |
| 12q24.12 | 111884608 | rs3184504   | $3.1 \times 10^{-10}$ | 0       | 1.000 | rs3184504  | $4.0 \times 10^{-25}$ | 21909115  | Diastolic blood pressure                   | SH2B3              |
| 12q24.12 | 111884608 | rs3184504   | $3.1 \times 10^{-10}$ | 0       | 1.000 | rs3184504  | $2.0 \times 10^{-38}$ | 21829393  | Type 1 diabetes autoantibodies             | SH2B3              |
| 12q24.12 | 111884608 | rs3184504   | $3.1 \times 10^{-10}$ | 0       | 1.000 | rs3184504  | $6.0 \times 10^{-6}$  | 21378990  | Coronary heart disease                     | SH2B3              |

|          |           |             |                       |         |       |            |                        |          |                                            |                    |
|----------|-----------|-------------|-----------------------|---------|-------|------------|------------------------|----------|--------------------------------------------|--------------------|
| 12q24.12 | 111884608 | rs3184504   | 3.1×10 <sup>-10</sup> | 0       | 1.000 | rs3184504  | 6.0×10 <sup>-6</sup>   | 20453842 | Rheumatoid arthritis                       | SH2B3              |
| 12q24.12 | 111884608 | rs3184504   | 3.1×10 <sup>-10</sup> | 0       | 1.000 | rs3184504  | 3.0×10 <sup>-27</sup>  | 19430480 | Type 1 diabetes                            | SH2B3              |
| 12q24.12 | 111884608 | rs3184504   | 3.1×10 <sup>-10</sup> | 0       | 1.000 | rs3184504  | 5.0×10 <sup>-9</sup>   | 19430479 | Systolic blood pressure                    | SH2B3              |
| 12q24.12 | 111884608 | rs3184504   | 3.1×10 <sup>-10</sup> | 0       | 1.000 | rs3184504  | 3.0×10 <sup>-14</sup>  | 19430479 | Diastolic blood pressure                   | SH2B3              |
| 12q24.12 | 111884608 | rs3184504   | 3.1×10 <sup>-10</sup> | 0       | 1.000 | rs3184504  | 7.0×10 <sup>-19</sup>  | 19198610 | Eosinophil counts                          | SH2B3              |
| 12q24.12 | 111884608 | rs3184504   | 3.1×10 <sup>-10</sup> | 19763   | 0.924 | rs4766578  | 4.0×10 <sup>-18</sup>  | 22561518 | Vitiligo                                   | SH2B3              |
| 12q24.12 | 111884608 | rs3184504   | 3.1×10 <sup>-10</sup> | 25611   | 0.934 | rs10774625 | 2.0×10 <sup>-13</sup>  | 21060863 | Retinal vascular caliber                   | ATXN2,PTPN11,SH2B3 |
| 12q24.12 | 111884608 | rs3184504   | 3.1×10 <sup>-10</sup> | 123148  | 0.979 | rs653178   | 7.0×10 <sup>-12</sup>  | 23263486 | Urate levels                               | ATXN2, PTPN11      |
| 12q24.12 | 111884608 | rs3184504   | 3.1×10 <sup>-10</sup> | 123148  | 0.979 | rs653178   | 7.0×10 <sup>-20</sup>  | 21909110 | Blood pressure                             | ATXN2              |
| 12q24.12 | 111884608 | rs3184504   | 3.1×10 <sup>-10</sup> | 123148  | 0.979 | rs653178   | 3.0×10 <sup>-19</sup>  | 21383967 | Celiac disease and Rheumatoid arthritis    | SH2B3              |
| 12q24.12 | 111884608 | rs3184504   | 3.1×10 <sup>-10</sup> | 123148  | 0.979 | rs653178   | 4.0×10 <sup>-11</sup>  | 20383146 | Chronic kidney disease                     | ATXN2              |
| 12q24.12 | 111884608 | rs3184504   | 3.1×10 <sup>-10</sup> | 123148  | 0.979 | rs653178   | 7.0×10 <sup>-21</sup>  | 20190752 | Celiac disease                             | SH2B3              |
| 12q24.12 | 111884608 | rs3184504   | 3.1×10 <sup>-10</sup> | 123148  | 0.979 | rs653178   | 3.0×10 <sup>-18</sup>  | 19430483 | Diastolic blood pressure                   | ATXN2, SH2B3       |
| 12q24.12 | 111884608 | rs3184504   | 3.1×10 <sup>-10</sup> | 123148  | 0.979 | rs653178   | 8.0×10 <sup>-8</sup>   | 18311140 | Celiac disease                             | SH2B3, ATXN2       |
| 12q24.12 | 111884608 | rs3184504   | 3.1×10 <sup>-10</sup> | 187816  | 0.808 | rs11065987 | 8.0×10 <sup>-11</sup>  | 23297363 | Tetralogy of Fallot                        | PTPN11             |
| 12q24.12 | 111884608 | rs3184504   | 3.1×10 <sup>-10</sup> | 187816  | 0.808 | rs11065987 | 2.0×10 <sup>-9</sup>   | 20686565 | LDL cholesterol                            | BRAP               |
| 12q24.12 | 111884608 | rs3184504   | 3.1×10 <sup>-10</sup> | 187816  | 0.808 | rs11065987 | 7.0×10 <sup>-12</sup>  | 20686565 | Cholesterol, total                         | BRAP               |
| 12q24.12 | 111884608 | rs3184504   | 3.1×10 <sup>-10</sup> | 187816  | 0.808 | rs11065987 | 1.0×10 <sup>-11</sup>  | 19862010 | Hemoglobin                                 | TRAFD1             |
| 12q24.12 | 111884608 | rs3184504   | 3.1×10 <sup>-10</sup> | 187816  | 0.808 | rs11065987 | 1.0×10 <sup>-12</sup>  | 19862010 | Hematocrit                                 | SH2B3, ATXN2       |
| 19p13.2  | 8789912   | rs2918308   | 1.1×10 <sup>-9</sup>  | -531    | 1.000 | rs2164983  | 7.0×10 <sup>-9</sup>   | 22197932 | Atopic dermatitis                          | ACTL9              |
| 1p36.23  | 8894346   | rs12068123  | 5.6×10 <sup>-9</sup>  | -368204 | 0.559 | rs4908760  | 7.0×10 <sup>-15</sup>  | 20410501 | Vitiligo                                   | RERE               |
| 9q34.2   | 136155000 | rs635634    | 8.5×10 <sup>-9</sup>  | -5601   | 0.991 | rs507666   | 3.0×10 <sup>-91</sup>  | 21533024 | Soluble ICAM-1                             | ABO                |
| 9q34.2   | 136155000 | rs635634    | 8.5×10 <sup>-9</sup>  | -5601   | 0.991 | rs507666   | 5.0×10 <sup>-29</sup>  | 18604267 | Soluble ICAM-1                             | ABO                |
| 9q34.2   | 136155000 | rs635634    | 8.5×10 <sup>-9</sup>  | -1125   | 0.841 | rs651007   | 2.0×10 <sup>-25</sup>  | 23381943 | End-stage coagulation                      | ABO                |
| 9q34.2   | 136155000 | rs635634    | 8.5×10 <sup>-9</sup>  | -1125   | 0.841 | rs651007   | 6.0×10 <sup>-9</sup>   | 21909109 | Metabolite levels                          | ABO                |
| 9q34.2   | 136155000 | rs635634    | 8.5×10 <sup>-9</sup>  | -1125   | 0.841 | rs651007   | 2.0×10 <sup>-82</sup>  | 20147318 | E-selectin levels                          | ABO                |
| 9q34.2   | 136155000 | rs635634    | 8.5×10 <sup>-9</sup>  | -832    | 0.841 | rs579459   | 9.0×10 <sup>-18</sup>  | 23222517 | Red blood cell traits                      | ABO                |
| 9q34.2   | 136155000 | rs635634    | 8.5×10 <sup>-9</sup>  | -832    | 0.841 | rs579459   | 3.0×10 <sup>-123</sup> | 22001757 | Liver enzyme levels (alkaline phosphatase) | ABO                |
| 9q34.2   | 136155000 | rs635634    | 8.5×10 <sup>-9</sup>  | -832    | 0.841 | rs579459   | 4.0×10 <sup>-14</sup>  | 21378990 | Coronary heart disease                     | ABO                |
| 9q34.2   | 136155000 | rs635634    | 8.5×10 <sup>-9</sup>  | -832    | 0.841 | rs579459   | 2.0×10 <sup>-41</sup>  | 20167578 | Soluble levels of adhesion molecules       | ABO                |
| 9q34.2   | 136155000 | rs635634    | 8.5×10 <sup>-9</sup>  | -832    | 0.841 | rs579459   | 1.0×10 <sup>-29</sup>  | 19729612 | Soluble E-selectin levels                  | ABO                |
| 9q34.2   | 136155000 | rs635634    | 8.5×10 <sup>-9</sup>  | -133    | 0.841 | rs495828   | 3.0×10 <sup>-16</sup>  | 22672568 | Venous thromboembolism                     | ABO                |
| 9q34.2   | 136155000 | rs635634    | 8.5×10 <sup>-9</sup>  | -133    | 0.841 | rs495828   | 3.0×10 <sup>-12</sup>  | 20139978 | Red blood cell count                       | ABO                |
| 9q34.2   | 136155000 | rs635634    | 8.5×10 <sup>-9</sup>  | -133    | 0.841 | rs495828   | 6.0×10 <sup>-10</sup>  | 20139978 | Hematological and biochemical traits       | ABO                |
| 9q34.2   | 136155000 | rs635634    | 8.5×10 <sup>-9</sup>  | -133    | 0.841 | rs495828   | 3.0×10 <sup>-8</sup>   | 20066004 | Angiotensin-converting enzyme activity     | ABO                |
| 9q34.2   | 136155000 | rs635634    | 8.5×10 <sup>-9</sup>  | 0       | 1.000 | rs635634   | 8.0×10 <sup>-22</sup>  | 20686565 | LDL cholesterol                            | ABO                |
| 9q34.2   | 136155000 | rs635634    | 8.5×10 <sup>-9</sup>  | 0       | 1.000 | rs635634   | 9.0×10 <sup>-21</sup>  | 20686565 | Cholesterol, total                         | ABO                |
| 6q23.3   | 138003822 | rs11757201  | 3.0×10 <sup>-8</sup>  | -30754  | 0.963 | rs2327832  | 4.0×10 <sup>-19</sup>  | 20190752 | Celiac disease                             | TNFAIP3            |
| 6q23.3   | 138003822 | rs11757201  | 3.0×10 <sup>-8</sup>  | 2682    | 1.000 | rs6920220  | 1.0×10 <sup>-21</sup>  | 23128233 | Inflammatory bowel disease                 | TNFAIP3            |
| 6q23.3   | 138003822 | rs11757201  | 3.0×10 <sup>-8</sup>  | 2682    | 1.000 | rs6920220  | 8.0×10 <sup>-17</sup>  | 21297633 | Ulcerative colitis                         | Intergenic         |
| 6q23.3   | 138003822 | rs11757201  | 3.0×10 <sup>-8</sup>  | 2682    | 1.000 | rs6920220  | 9.0×10 <sup>-13</sup>  | 20453842 | Rheumatoid arthritis                       | TNFAIP3            |
| 6q23.3   | 138003822 | rs11757201  | 3.0×10 <sup>-8</sup>  | 2682    | 1.000 | rs6920220  | 2.0×10 <sup>-9</sup>   | 18794853 | Rheumatoid arthritis                       | OLIG3, TNFIP3      |
| 6q23.3   | 138003822 | rs11757201  | 3.0×10 <sup>-8</sup>  | 2682    | 1.000 | rs6920220  | 1.0×10 <sup>-7</sup>   | 17982456 | Rheumatoid arthritis                       | TNFAIP3, OLIG3     |
| 7q31.2   | 116917244 | rs200608253 | 4.1×10 <sup>-8</sup>  | -24398  | 0.503 | rs38904    | 1.0×10 <sup>-8</sup>   | 23128233 | Inflammatory bowel disease                 | Intergenic         |
| 7q31.2   | 116917244 | rs200608253 | 4.1×10 <sup>-8</sup>  | -126    | 0.774 | rs4730775  | 3.0×10 <sup>-8</sup>   | 21732829 | Dupuytren's disease                        | WNT2               |

## Replication of GWAS Catalog Results

The following table shows, for each GWAS Catalog result for similar traits, our association test result for our best available proxy (distance < 100kb, r<sup>2</sup> > 0.8).

*no relevant GWAS catalog terms were available*

## Nearby Nonsynonymous SNPs

| region   | position  | our.name    | our.pval              | dist   | rsqr  | assay.name  | gene      | aa.chg |
|----------|-----------|-------------|-----------------------|--------|-------|-------------|-----------|--------|
| 17p11.2  | 16852187  | rs34557412  | 2.7×10 <sup>-21</sup> | 0      | 1.000 | rs34557412  | TNFRSF13B | C104R  |
| 6p21.33  | 31322690  | rs41543314  | 5.4×10 <sup>-21</sup> | 56174  | 0.974 | rs41558312  | MICA      | Q114R  |
| 6p21.33  | 31322690  | rs41543314  | 5.4×10 <sup>-21</sup> | 57312  | 0.923 | rs199503730 | MICA      | V298C  |
| 6p21.33  | 31322690  | rs41543314  | 5.4×10 <sup>-21</sup> | 152130 | 0.784 | rs41293883  | MICB      | T212I  |
| 14q21.1  | 38025098  | rs148131694 | 7.8×10 <sup>-13</sup> | 36644  | 0.649 | rs7144658   | FOXA1     | A83T   |
| 12q24.12 | 111884608 | rs3184504   | 3.1×10 <sup>-10</sup> | 0      | 1.000 | rs3184504   | SH2B3     | W262R  |
| 11p15.4  | 8756856   | rs11042055  | 7.0×10 <sup>-9</sup>  | -4967  | 0.963 | rs3794153   | ST5       | K316N  |
| 17q11.2  | 26858395  | rs62066768  | 1.1×10 <sup>-8</sup>  | -6793  | 0.972 | rs2071587   | FOXP1     | R69C   |
| 22q11.21 | 19752943  | rs41298830  | 5.0×10 <sup>-8</sup>  | 1148   | 0.915 | rs72646967  | TBX1      | N397H  |

## Nearby Expression QTLs

| region   | position | our.name   | our.pval              | dist    | rsqr  | assay.name | eqtl.dist | eqtl.gene | eqtl.pval             | eqtl.rsqr | tissue         | pubmed.id |
|----------|----------|------------|-----------------------|---------|-------|------------|-----------|-----------|-----------------------|-----------|----------------|-----------|
| 12p13.31 | 6493351  | rs10849448 | 2.3×10 <sup>-35</sup> | -122985 | 0.792 | rs12354    | 140619    | NCAPD2    | 9.9×10 <sup>-5</sup>  |           | Lymphoblastoid | 20220756  |
| 12p13.31 | 6493351  | rs10849448 | 2.3×10 <sup>-35</sup> | -119304 | 0.854 | rs9669611  | -3344     | LTBR      | 2.2×10 <sup>-13</sup> | 0.228     | Lymphoblastoid | 17873874  |
| 12p13.31 | 6493351  | rs10849448 | 2.3×10 <sup>-35</sup> | -702    | 0.784 | rs11064157 | 7826      | LTBR      | 1.4×10 <sup>-7</sup>  | 0.095     | Monocyte       | 22446964  |
| 12p13.31 | 6493351  | rs10849448 | 2.3×10 <sup>-35</sup> | 0       | 1.000 | rs10849448 | 9140      | LTBR      | 3.5×10 <sup>-34</sup> | 0.331     | Lymphoblastoid | 24037378  |

|          |           |             |                       |         |       |             |         |               |                       |       |                |          |
|----------|-----------|-------------|-----------------------|---------|-------|-------------|---------|---------------|-----------------------|-------|----------------|----------|
| 12p13.31 | 6493351   | rs10849448  | 2.3×10 <sup>-35</sup> | 1924    | 0.891 | rs2364480   | 1941    | LTBR          | 2.7×10 <sup>-5</sup>  | 0.215 | Lymphoblastoid | 19644074 |
| 12p13.31 | 6493351   | rs10849448  | 2.3×10 <sup>-35</sup> | 1924    | 0.891 | rs2364480   | 1941    | LTBR          | 1.0×10 <sup>-5</sup>  | 0.236 | Fibroblast     | 19644074 |
| 12p13.31 | 6493351   | rs10849448  | 2.3×10 <sup>-35</sup> | 1924    | 0.891 | rs2364480   | 384634  | PTMS          | 0.00045               | 0.043 | Monocyte       | 22446964 |
| 22q12.2  | 30324654  | rs201112509 | 3.4×10 <sup>-34</sup> | -155218 | 0.600 | rs131291    | 978891  | XBP1          | 0.00044               | 0.157 | T-cell         | 19644074 |
| 22q12.2  | 30324654  | rs201112509 | 3.4×10 <sup>-34</sup> | 179553  | 0.743 | rs718772    | -338257 | UCRC          | 0.00038               | 0.044 | Monocyte       | 22446964 |
| 22q12.2  | 30324654  | rs201112509 | 3.4×10 <sup>-34</sup> | 230562  | 0.736 | rs9625933   | 103605  | OSM           | 4.5×10 <sup>-5</sup>  | 0.205 | T-cell         | 19644074 |
| 6p21.33  | 31322690  | rs41543314  | 5.4×10 <sup>-21</sup> | 188660  | 0.531 | rs9267487   | 32449   | MICB          | 1.9×10 <sup>-28</sup> | 0.079 | Monocyte       | 20502693 |
| 6p21.33  | 31322690  | rs41543314  | 5.4×10 <sup>-21</sup> | 188660  | 0.531 | rs9267487   | 284338  | HSPA1B        | 1.2×10 <sup>-6</sup>  | 0.016 | Monocyte       | 20502693 |
| 6p21.33  | 31322690  | rs41543314  | 5.4×10 <sup>-21</sup> | 221068  | 0.739 | rs3093661   | -64948  | MICB          | 2.8×10 <sup>-14</sup> | 0.187 | Monocyte       | 22446964 |
| 6p21.33  | 31322690  | rs41543314  | 5.4×10 <sup>-21</sup> | 221068  | 0.739 | rs3093661   | -64948  | MICB          | 5.9×10 <sup>-33</sup> | 0.402 | B-Cell         | 22446964 |
| 6p21.33  | 31322690  | rs41543314  | 5.4×10 <sup>-21</sup> | 221068  | 0.739 | rs3093661   | -438256 | PSORS1C2      | 2.1×10 <sup>-5</sup>  | 0.063 | Monocyte       | 22446964 |
| 4q24     | 103462038 | rs230523    | 4.5×10 <sup>-14</sup> | -18469  | 0.728 | rs1599961   | 94537   | NFKB1         | 0.00013               | 0.051 | Monocyte       | 22446964 |
| 4q24     | 106151642 | rs1391439   | 2.8×10 <sup>-12</sup> | 219449  | 1.000 | rs1391439   | 740728  | NPNT          | 7.2×10 <sup>-14</sup> | 0.234 | Lymphoblastoid | 17873874 |
| 20q13.12 | 44739419  | rs6032664   | 7.3×10 <sup>-12</sup> | 777     | 0.973 | rs6074022   | -253602 | ZSWIM3        | 0.0019                | 0.034 | Monocyte       | 22446964 |
| 7p22.2   | 2841164   | rs2644312   | 2.7×10 <sup>-11</sup> | -26529  | 0.506 | rs7807978   | 0       | GNA12         | 1.1×10 <sup>-10</sup> | 0.031 | Monocyte       | 20502693 |
| 7p22.2   | 2841164   | rs2644312   | 2.7×10 <sup>-11</sup> | -15577  | 0.607 | rs2644296   | -585133 | FTSJ2         | 9.3×10 <sup>-6</sup>  |       | Lymphoblastoid | 20220756 |
| 7p22.2   | 2841164   | rs2644312   | 2.7×10 <sup>-11</sup> | -1391   | 0.957 | rs1182181   | -38685  | GNA12         | 1.1×10 <sup>-5</sup>  |       | Lymphoblastoid | 20220756 |
| 7p22.2   | 2841164   | rs2644312   | 2.7×10 <sup>-11</sup> | 28821   | 0.975 | rs1182188   | -102078 | GNA12         | 2.8×10 <sup>-23</sup> | 0.299 | B-Cell         | 22446964 |
| 7p22.2   | 2841164   | rs2644312   | 2.7×10 <sup>-11</sup> | 31972   | 0.957 | rs1182183   | 110514  | AC006028.9    | 3.6×10 <sup>-14</sup> | 0.144 | Lymphoblastoid | 24037378 |
| 4p15.2   | 25114601  | rs10939037  | 1.4×10 <sup>-10</sup> | 53816   | 0.647 | rs13139513  | 251516  | ANAPC4        | 1.1×10 <sup>-5</sup>  | 0.067 | B-Cell         | 22446964 |
| 21q22.11 | 35052995  | rs200746495 | 4.4×10 <sup>-9</sup>  | -105139 | 0.588 | rs9978525   | -138221 | IFNGR2        | 3.4×10 <sup>-9</sup>  | 0.118 | Monocyte       | 22446964 |
| 21q22.11 | 35052995  | rs200746495 | 4.4×10 <sup>-9</sup>  | -105139 | 0.588 | rs9978525   | -136280 | TMEM50B       | 9.6×10 <sup>-8</sup>  | 0.097 | Monocyte       | 22446964 |
| 1p36.23  | 8894346   | rs12068123  | 5.6×10 <sup>-9</sup>  | -282242 | 0.573 | rs6577499   | 0       | RERE          | 1.5×10 <sup>-10</sup> | 0.030 | Monocyte       | 20502693 |
| 1p36.23  | 8894346   | rs12068123  | 5.6×10 <sup>-9</sup>  | -235634 | 0.593 | rs1318218   | -245857 | RERE          | 8.0×10 <sup>-6</sup>  | 0.069 | Monocyte       | 22446964 |
| 11p15.4  | 8756856   | rs11042055  | 7.0×10 <sup>-9</sup>  | 58597   | 0.897 | rs11042067  | 117045  | ST5           | 1.2×10 <sup>-7</sup>  | 0.073 | Lymphoblastoid | 24037378 |
| 11p15.4  | 8756856   | rs11042055  | 7.0×10 <sup>-9</sup>  | 119996  | 0.528 | rs2742552   | 64296   | C11ORF17      | 3.6×10 <sup>-15</sup> | 0.199 | B-Cell         | 22446964 |
| 11p15.4  | 8756856   | rs11042055  | 7.0×10 <sup>-9</sup>  | 256783  | 0.574 | rs7930026   | -72126  | C11ORF17      | 6.7×10 <sup>-7</sup>  | 0.085 | Monocyte       | 22446964 |
| 20q13.33 | 62606617  | rs41278232  | 7.5×10 <sup>-9</sup>  | 1003    | 0.593 | rs817344    | 3741    | SAMD10        | 4.6×10 <sup>-15</sup> | 0.153 | Lymphoblastoid | 24037378 |
| 20q13.33 | 62606617  | rs41278232  | 7.5×10 <sup>-9</sup>  | 24953   | 0.938 | rs112790215 | 34127   | LINC00176     | 1.1×10 <sup>-10</sup> | 0.106 | Lymphoblastoid | 24037378 |
| 16p11.2  | 30156398  | rs12931792  | 4.1×10 <sup>-8</sup>  | -101632 | 0.571 | rs7201780   | 218660  | CD2BP2        | 0.00045               |       | Lymphoblastoid | 20220756 |
| 16p11.2  | 30156398  | rs12931792  | 4.1×10 <sup>-8</sup>  | 9327    | 0.693 | rs4787495   | 40548   | GDPD3         | 1.1×10 <sup>-10</sup> | 0.030 | Monocyte       | 20502693 |
| 16p11.2  | 30156398  | rs12931792  | 4.1×10 <sup>-8</sup>  | 41753   | 0.705 | rs1132812   | -78602  | GDPD3         | 6.3×10 <sup>-5</sup>  | 0.056 | B-Cell         | 22446964 |
| 16p11.2  | 30156398  | rs12931792  | 4.1×10 <sup>-8</sup>  | 163909  | 0.565 | rs4471699   | 185677  | MAPK3         | 7.9×10 <sup>-19</sup> | 0.055 | Monocyte       | 20502693 |
| 16p11.2  | 30156398  | rs12931792  | 4.1×10 <sup>-8</sup>  | 183355  | 0.521 | rs77948921  | 873781  | RP11-345J4.5  | 4.7×10 <sup>-12</sup> | 0.121 | Lymphoblastoid | 24037378 |
| 16p11.2  | 30156398  | rs12931792  | 4.1×10 <sup>-8</sup>  | 184472  | 0.573 | rs7404371   | 925520  | RP11-231C14.2 | 5.2×10 <sup>-7</sup>  | 0.066 | Lymphoblastoid | 24037378 |

## Nearby Clinical Variants

| source  | region  | our.name   | our.pval              | dist | rsqr  | assay.name | gene      | phenotype                          | accession                    |
|---------|---------|------------|-----------------------|------|-------|------------|-----------|------------------------------------|------------------------------|
| clinvar | 17p11.2 | rs34557412 | 2.7×10 <sup>-21</sup> | 0    | 1.000 | rs34557412 | TNFRSF13B | Immunoglobulin A deficiency 2      | Office of Rare Diseases10198 |
| clinvar | 17p11.2 | rs34557412 | 2.7×10 <sup>-21</sup> | 0    | 1.000 | rs34557412 | TNFRSF13B | Common variable immunodeficiency 2 | NCBI curation                |

## Regional Association Plots

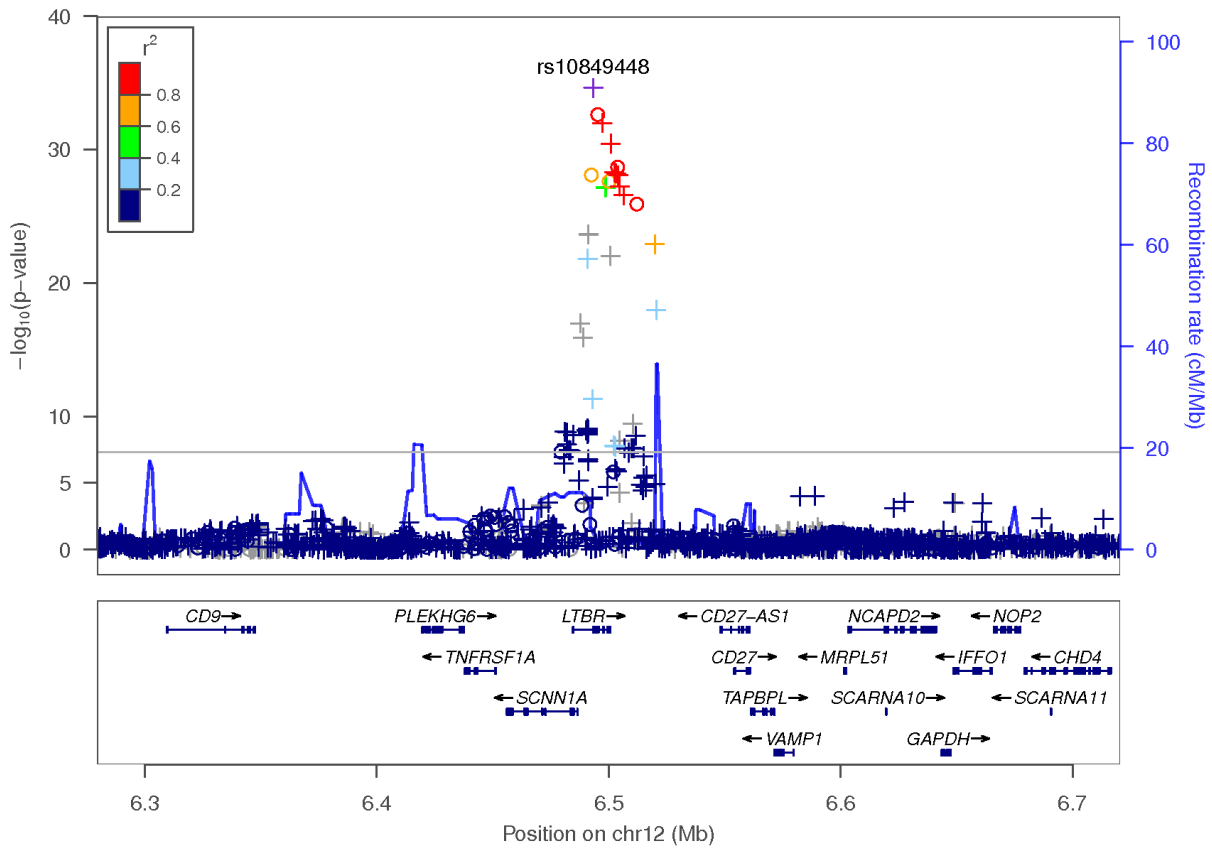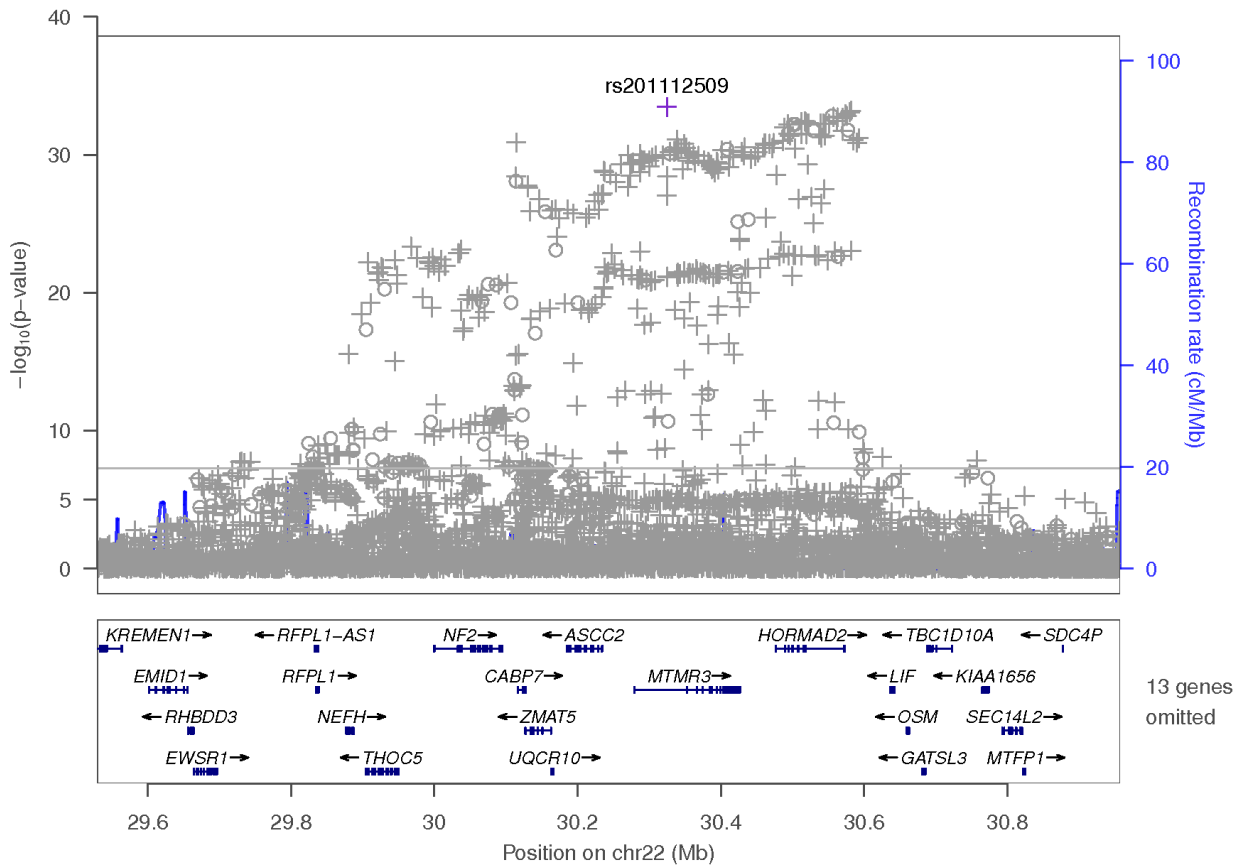

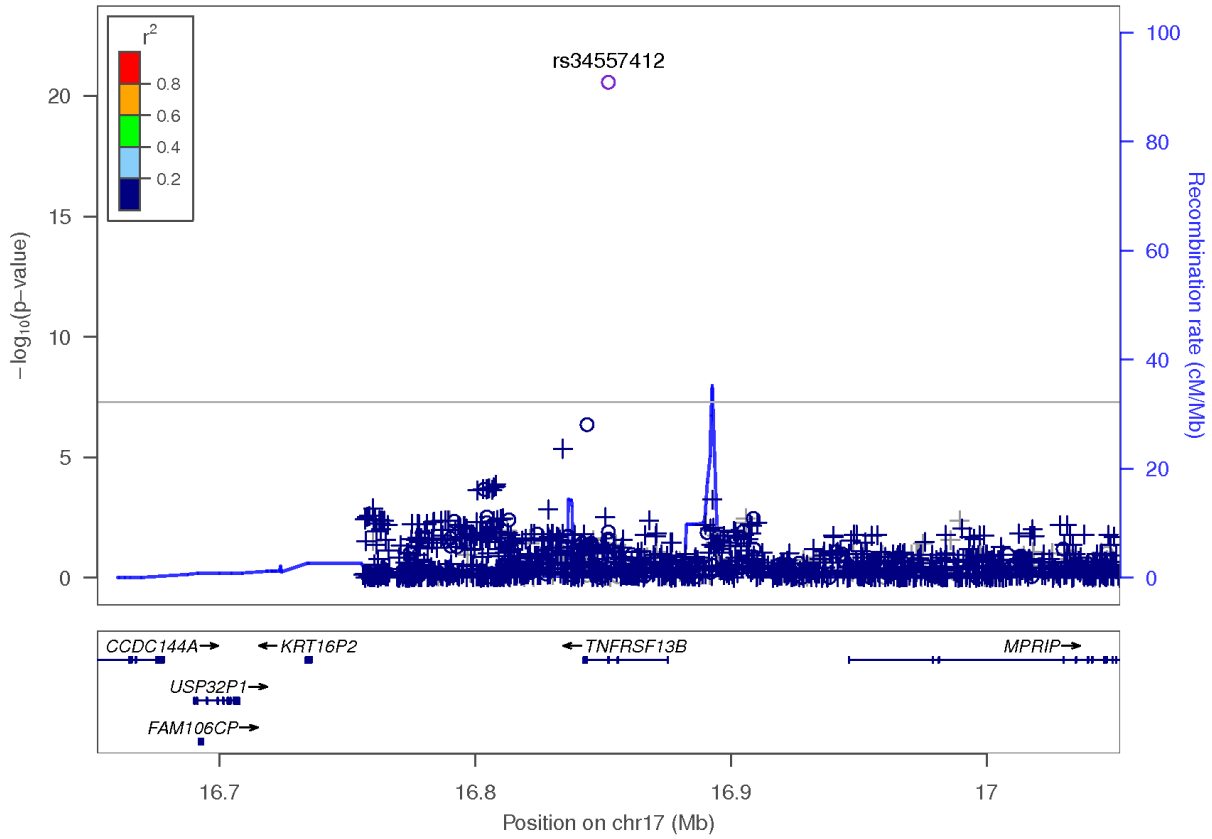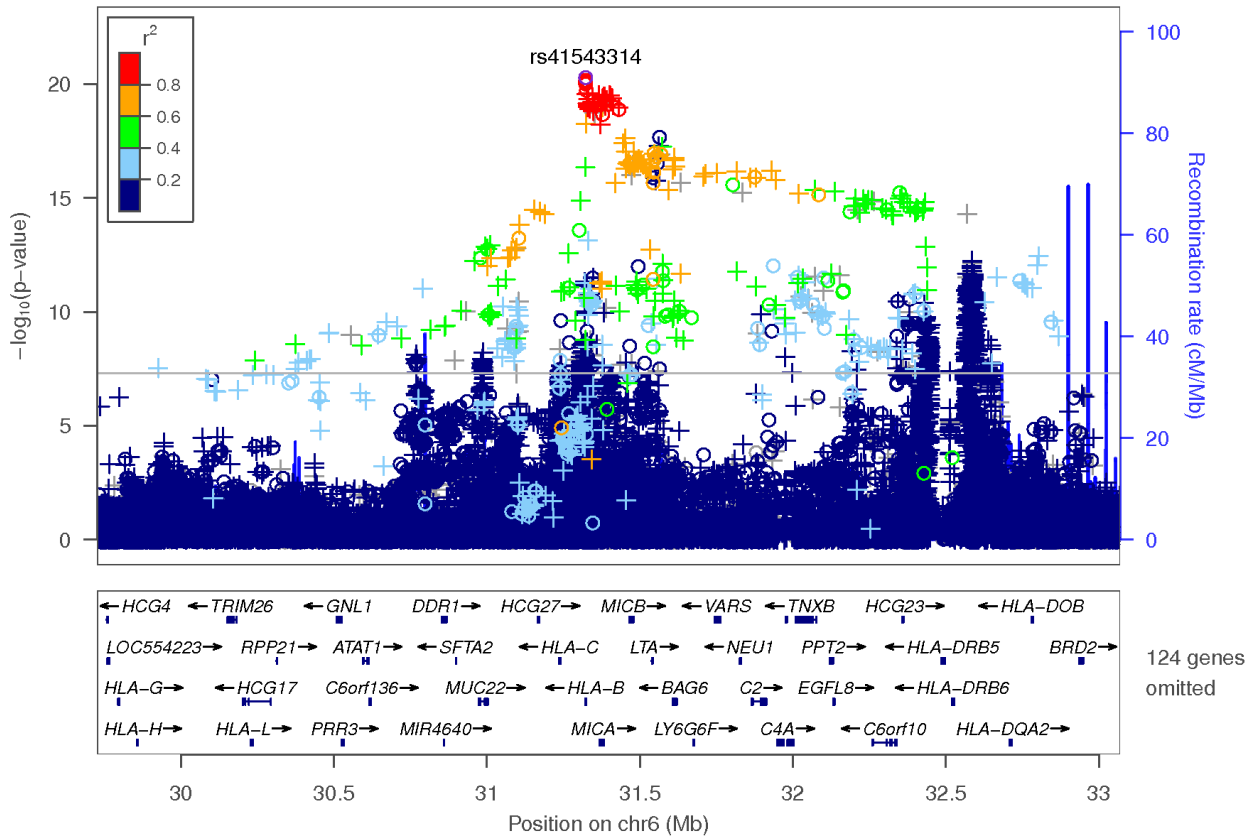



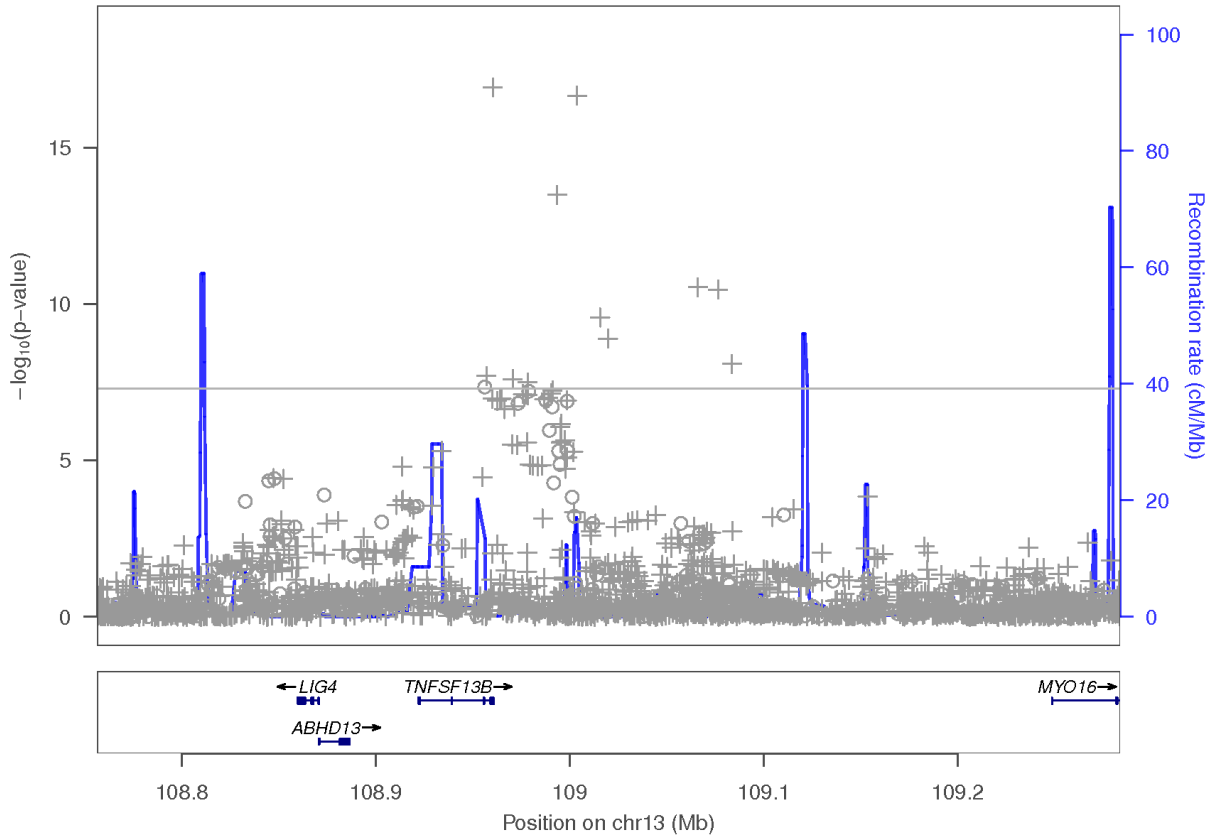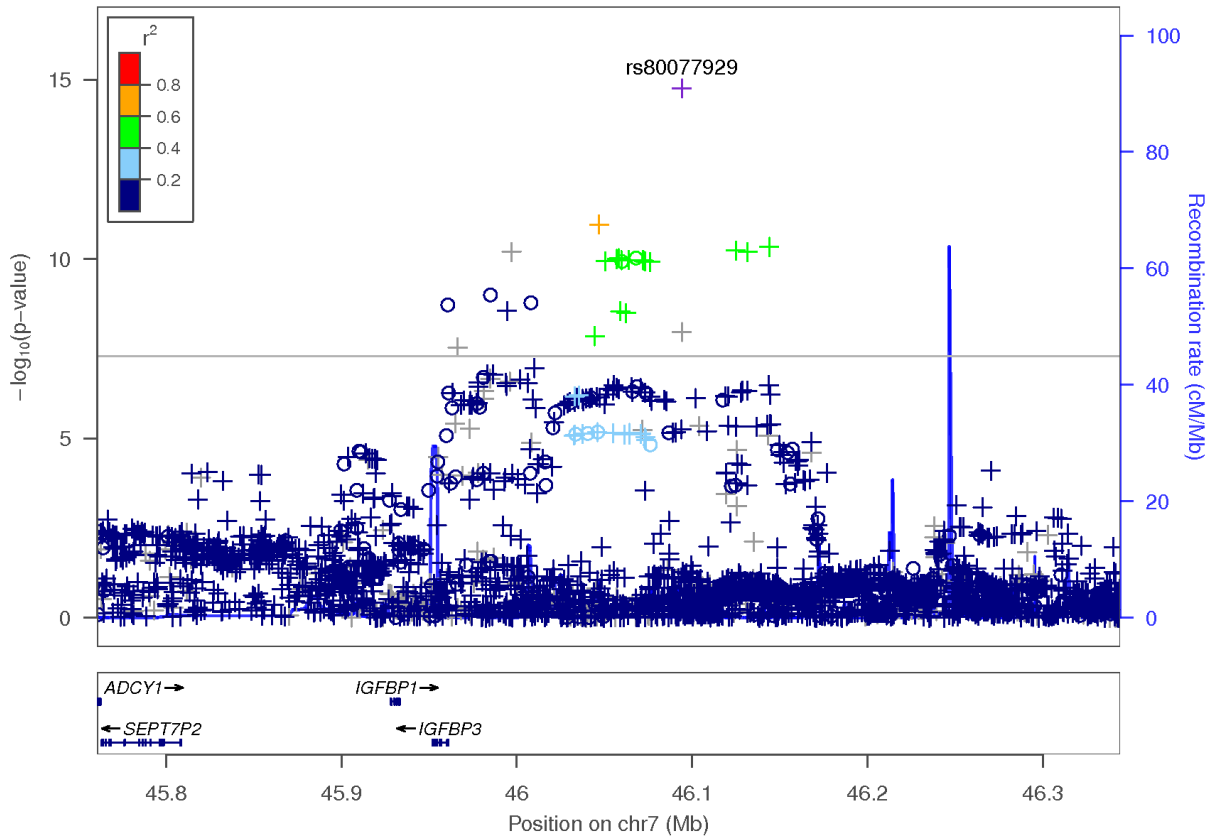

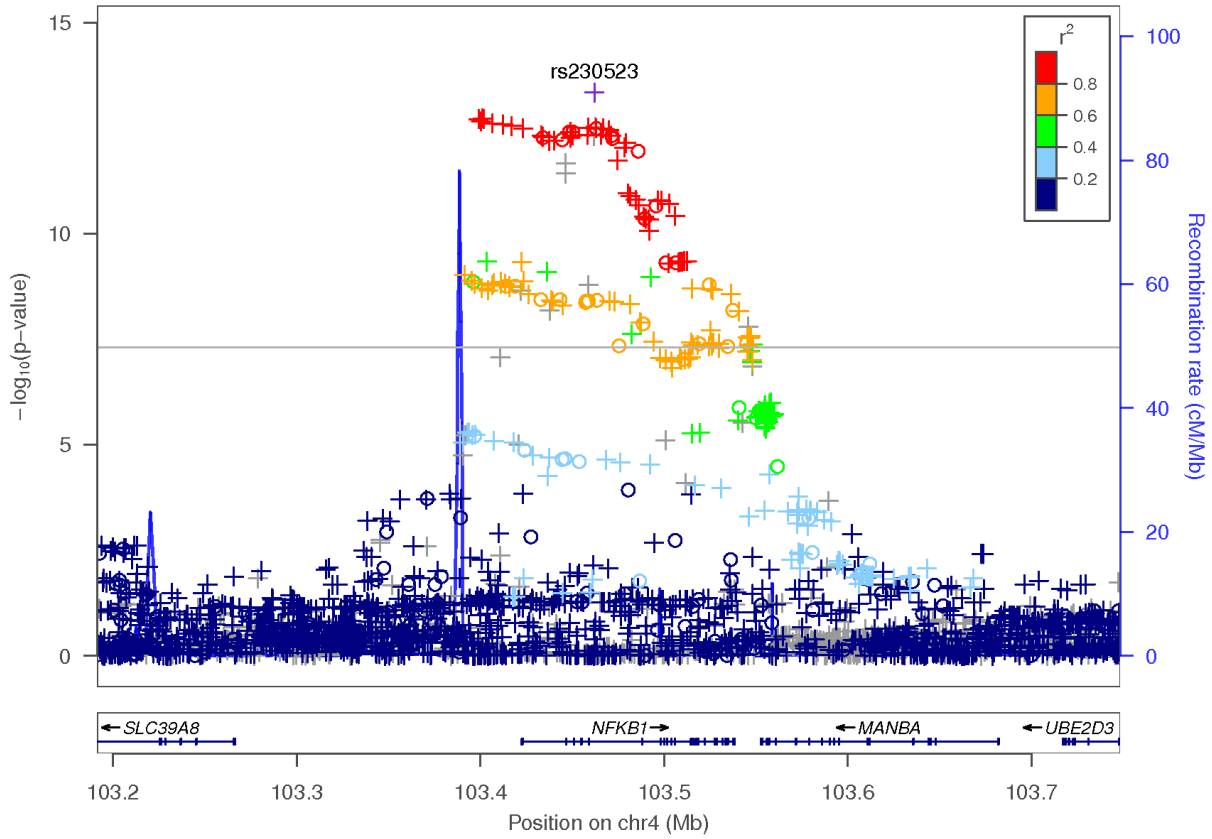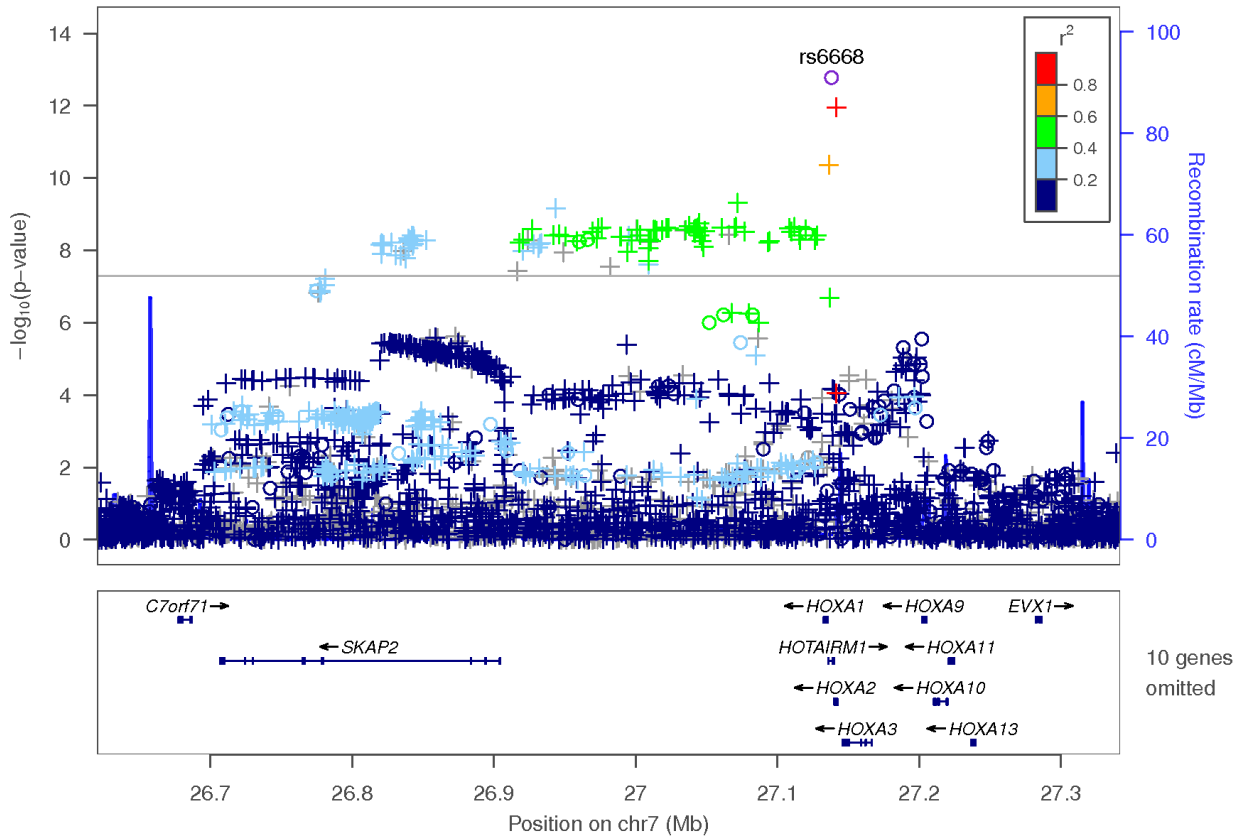

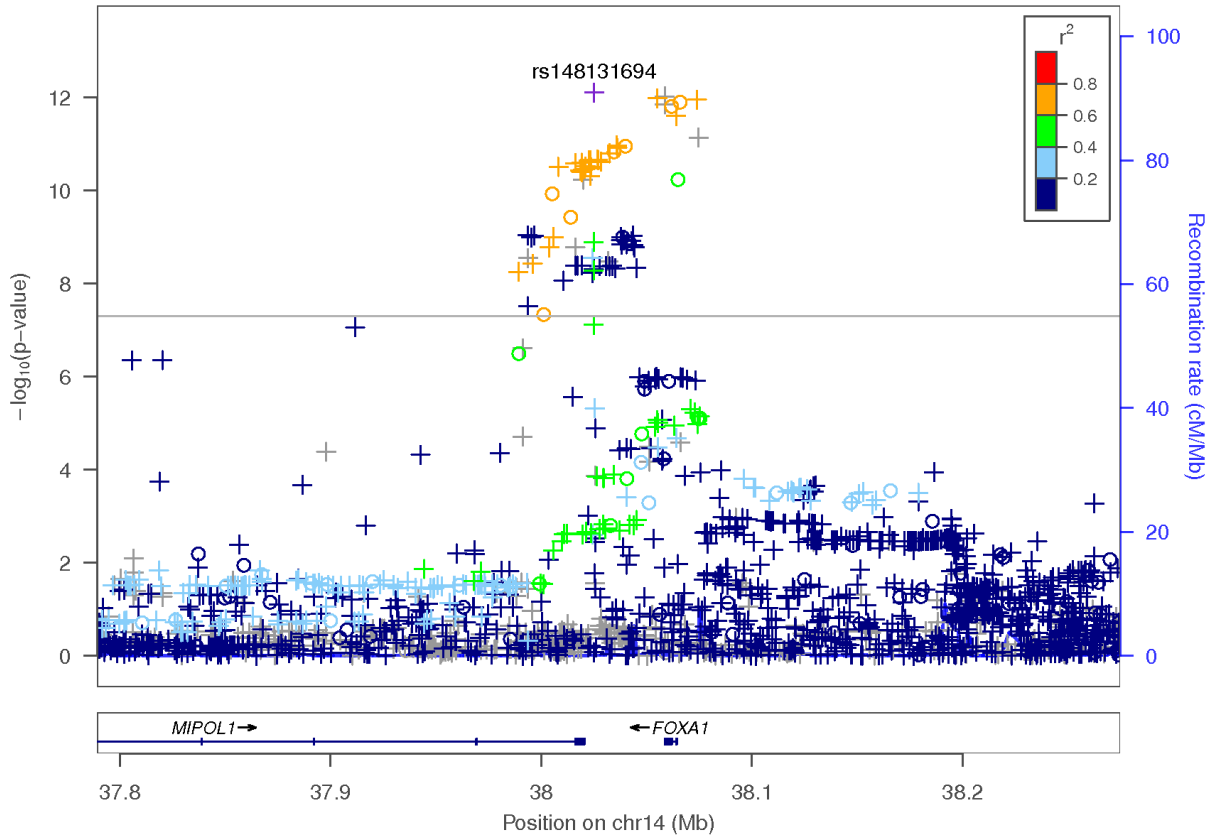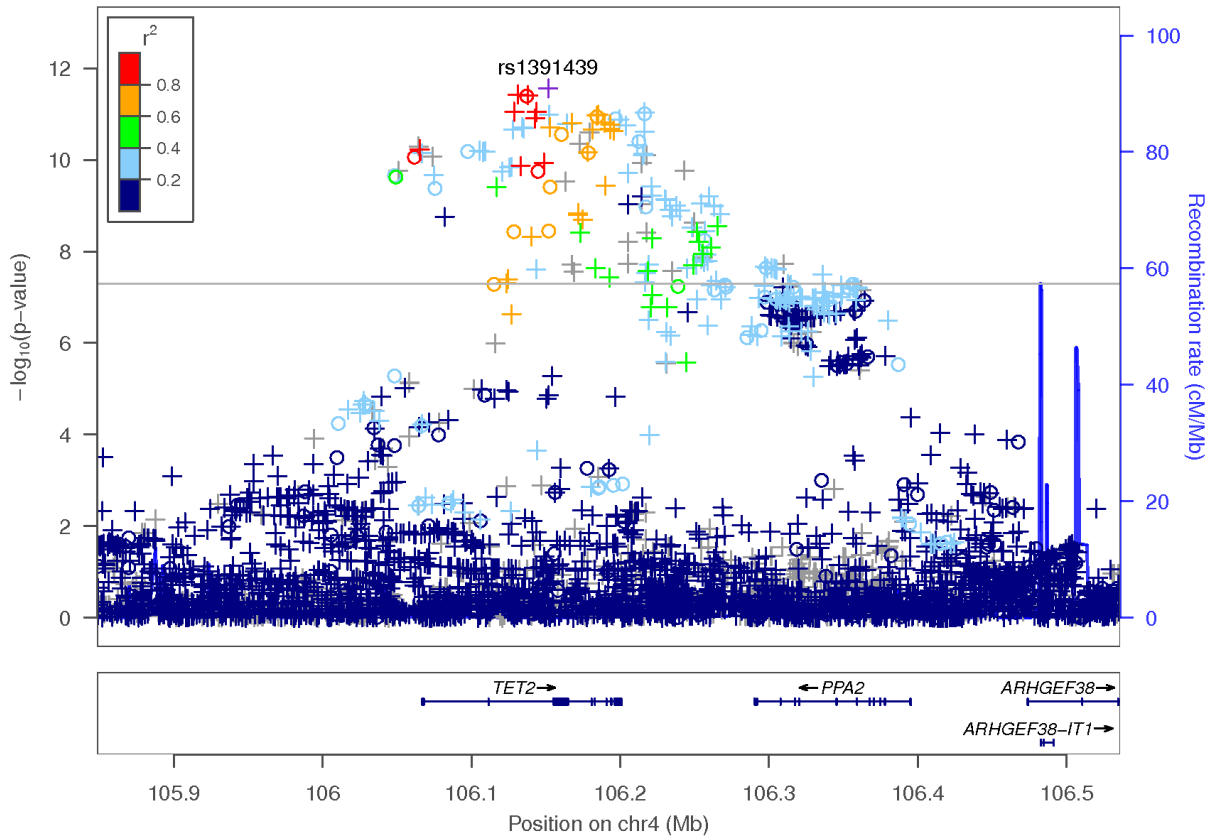

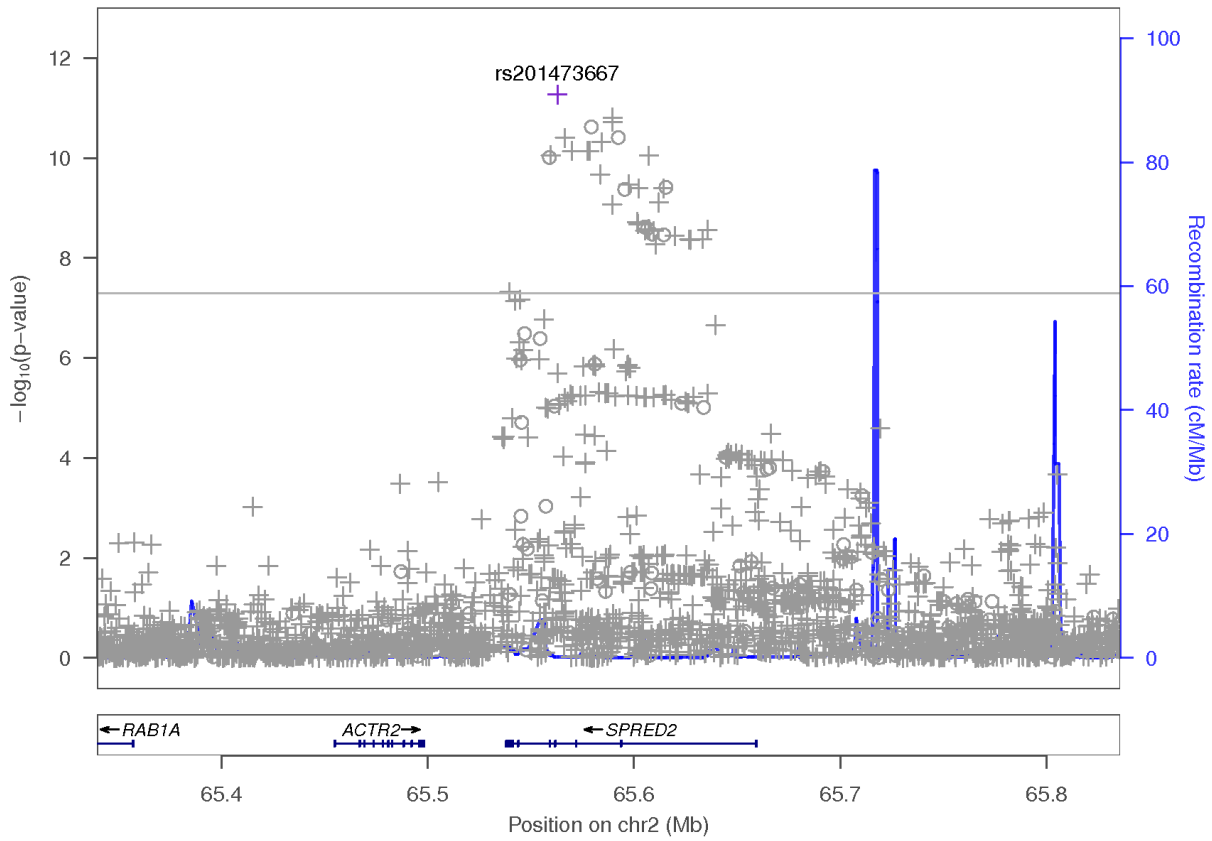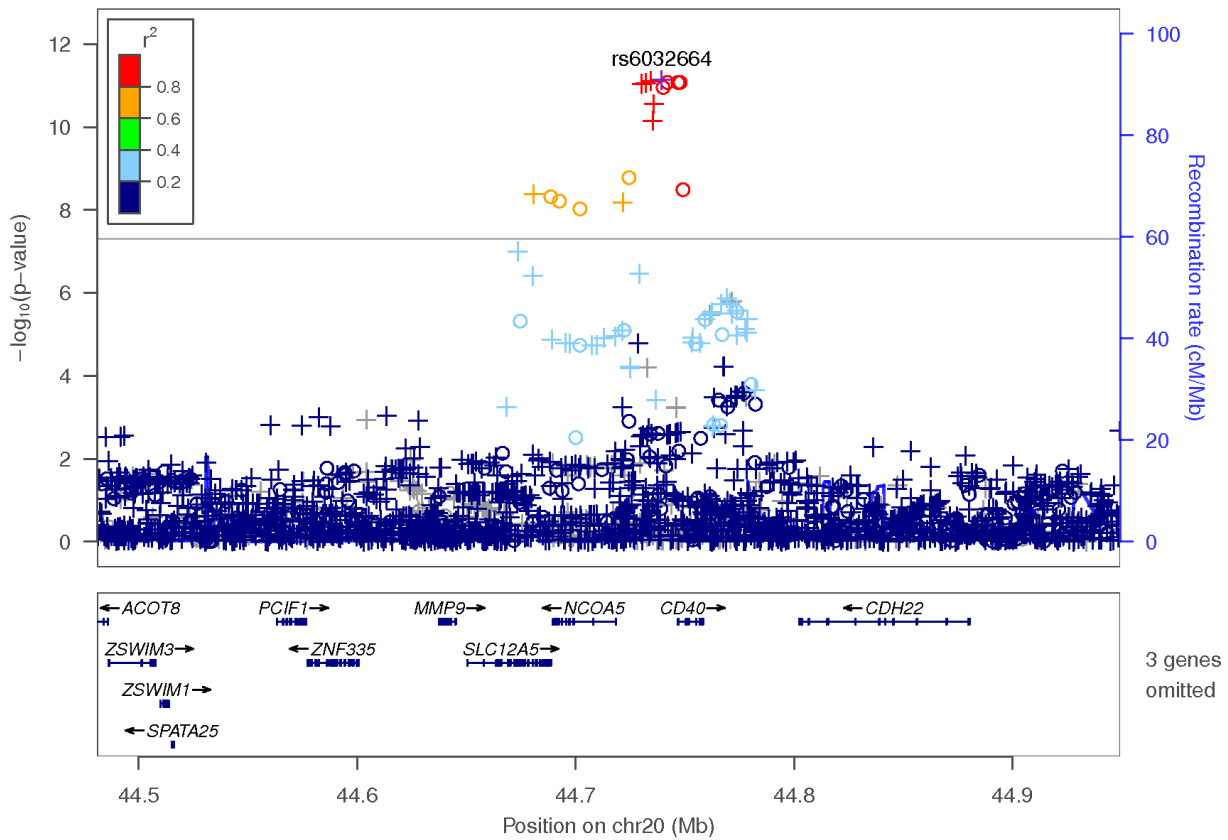

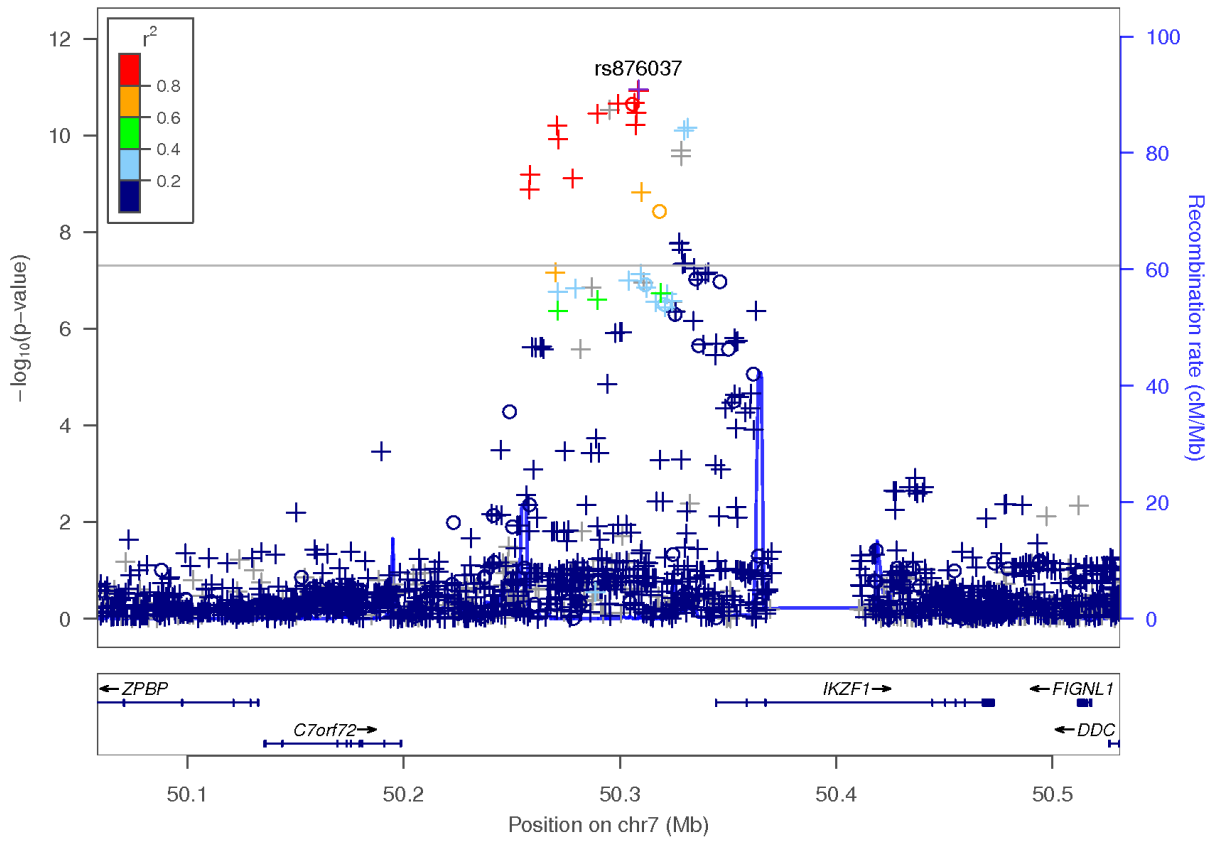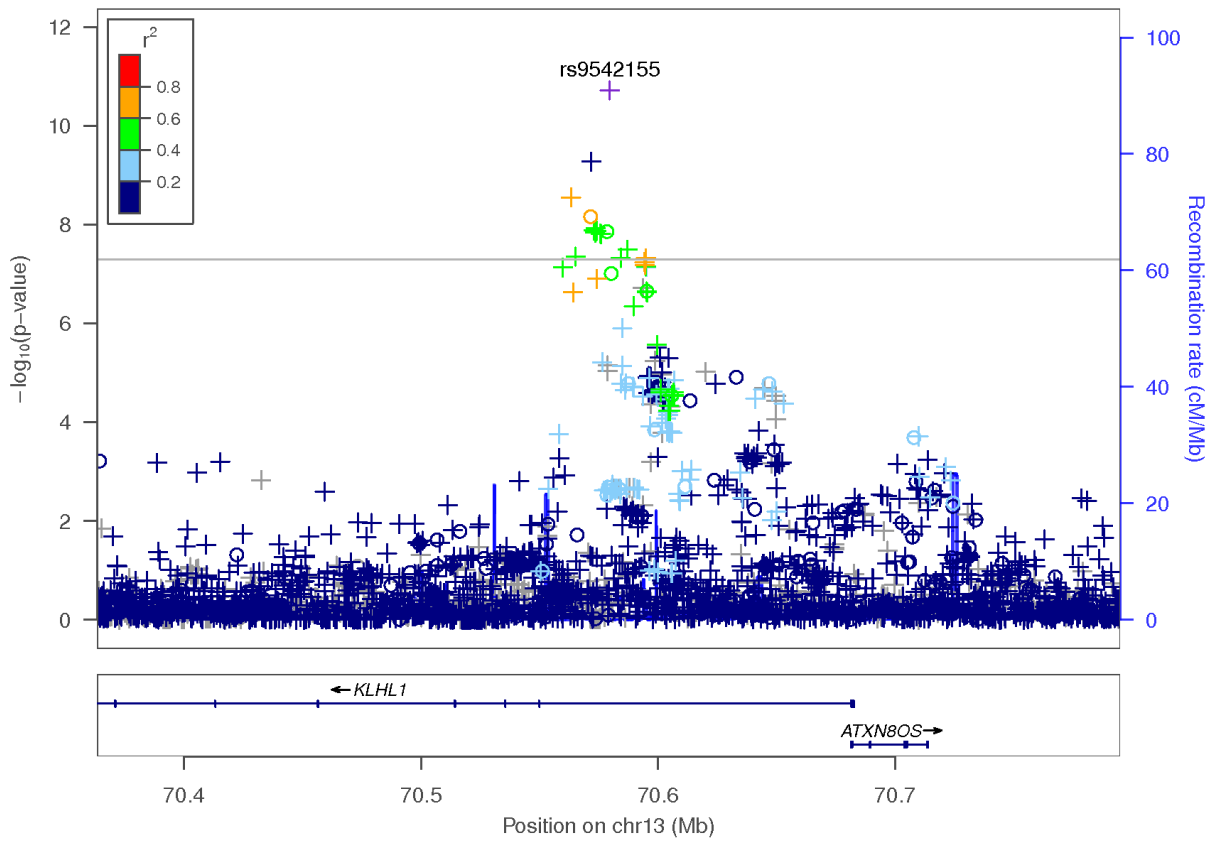

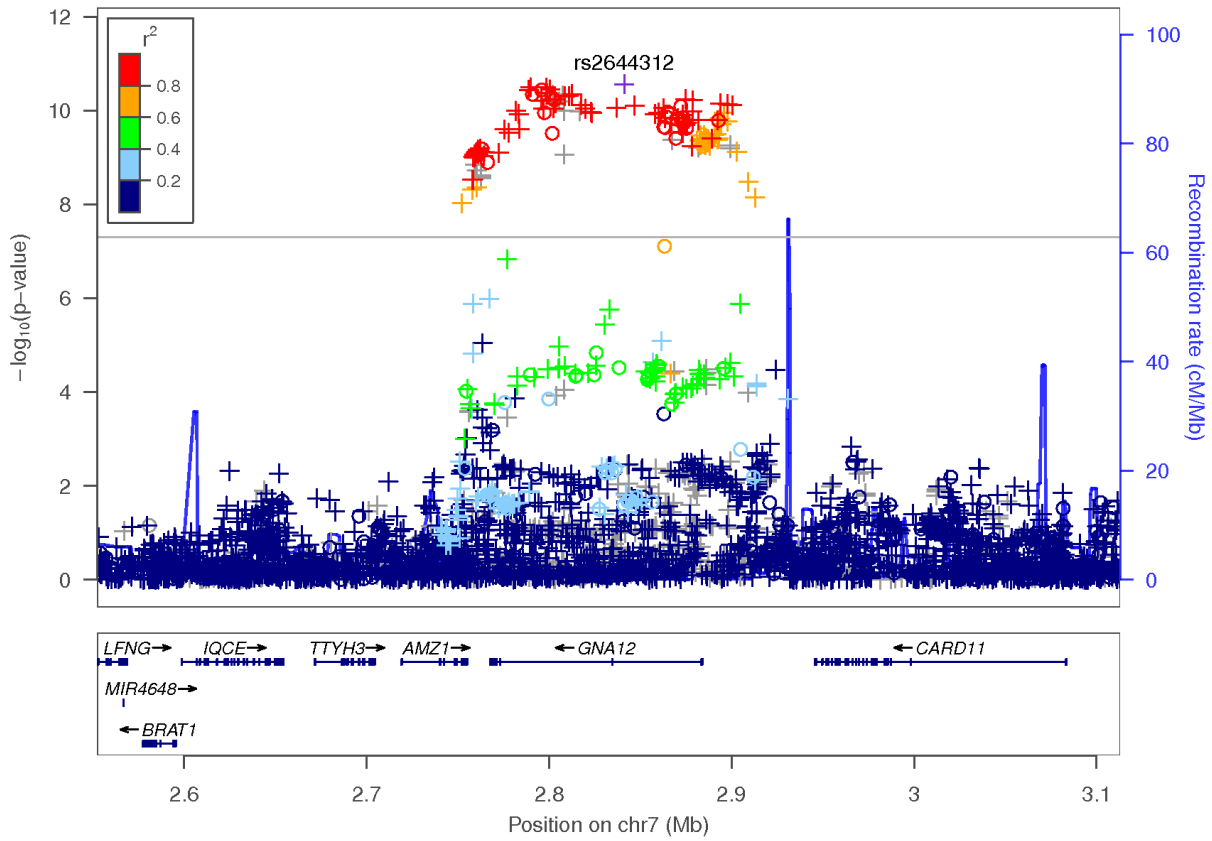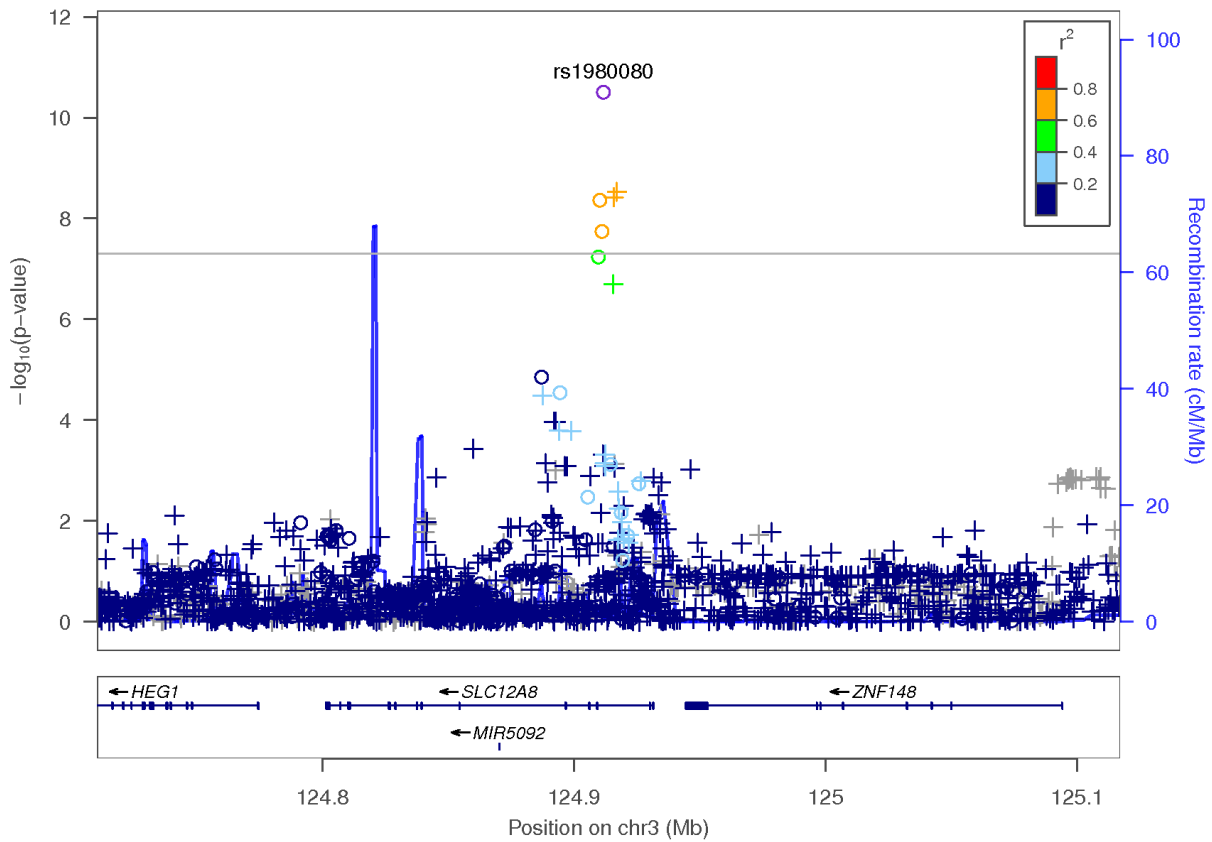

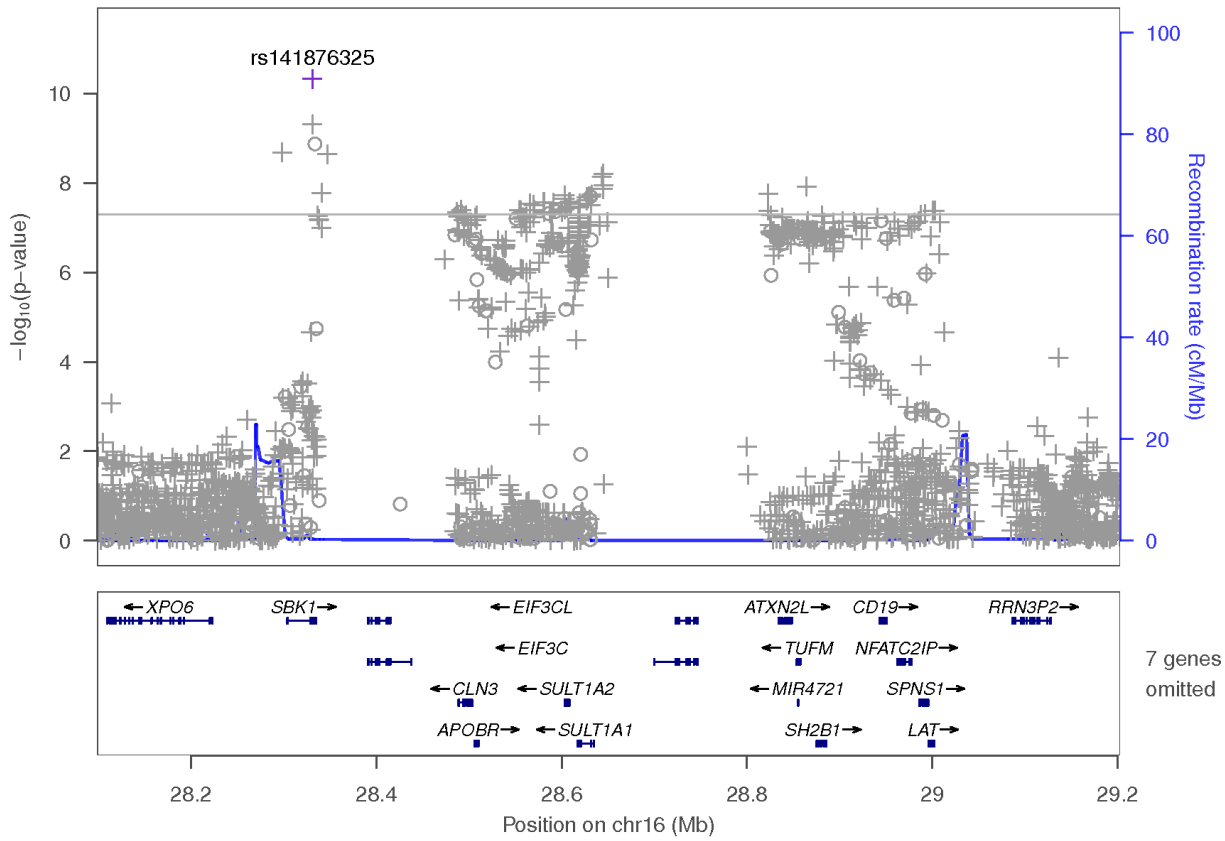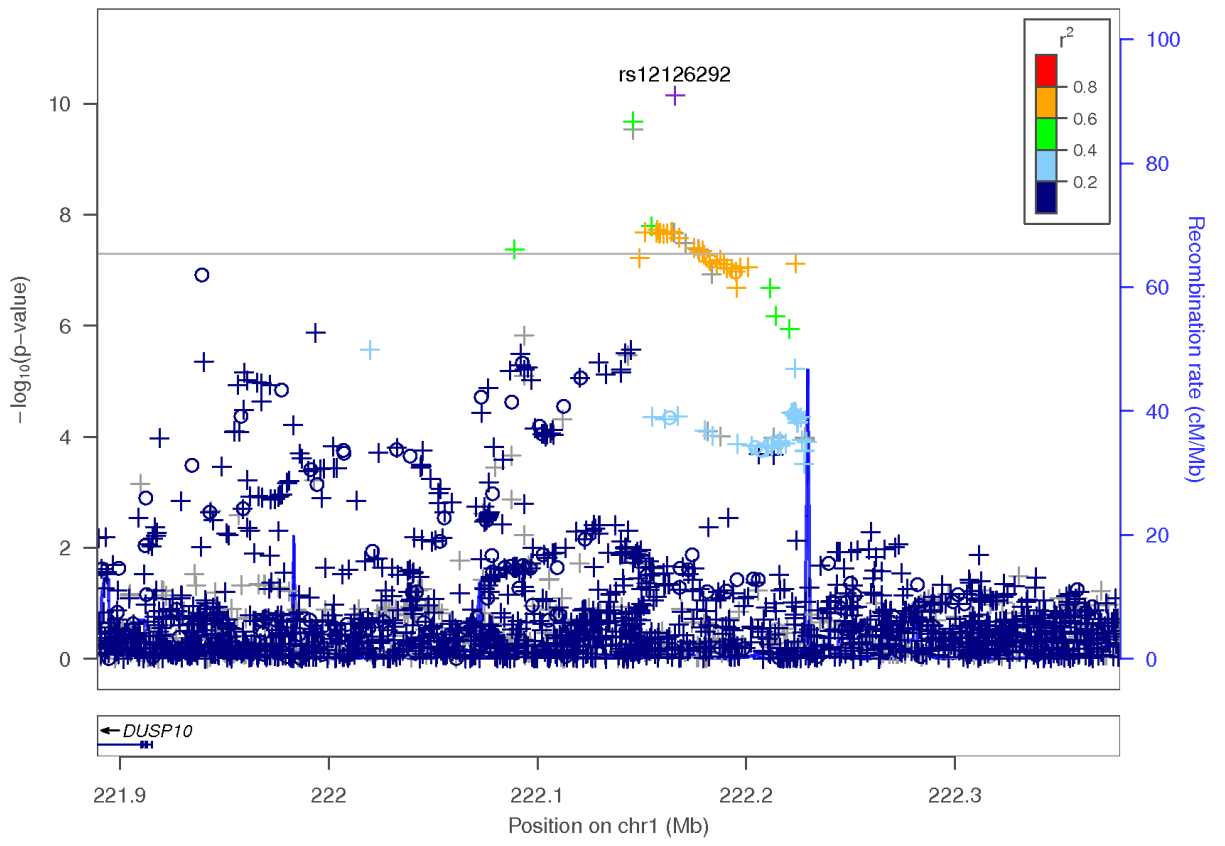

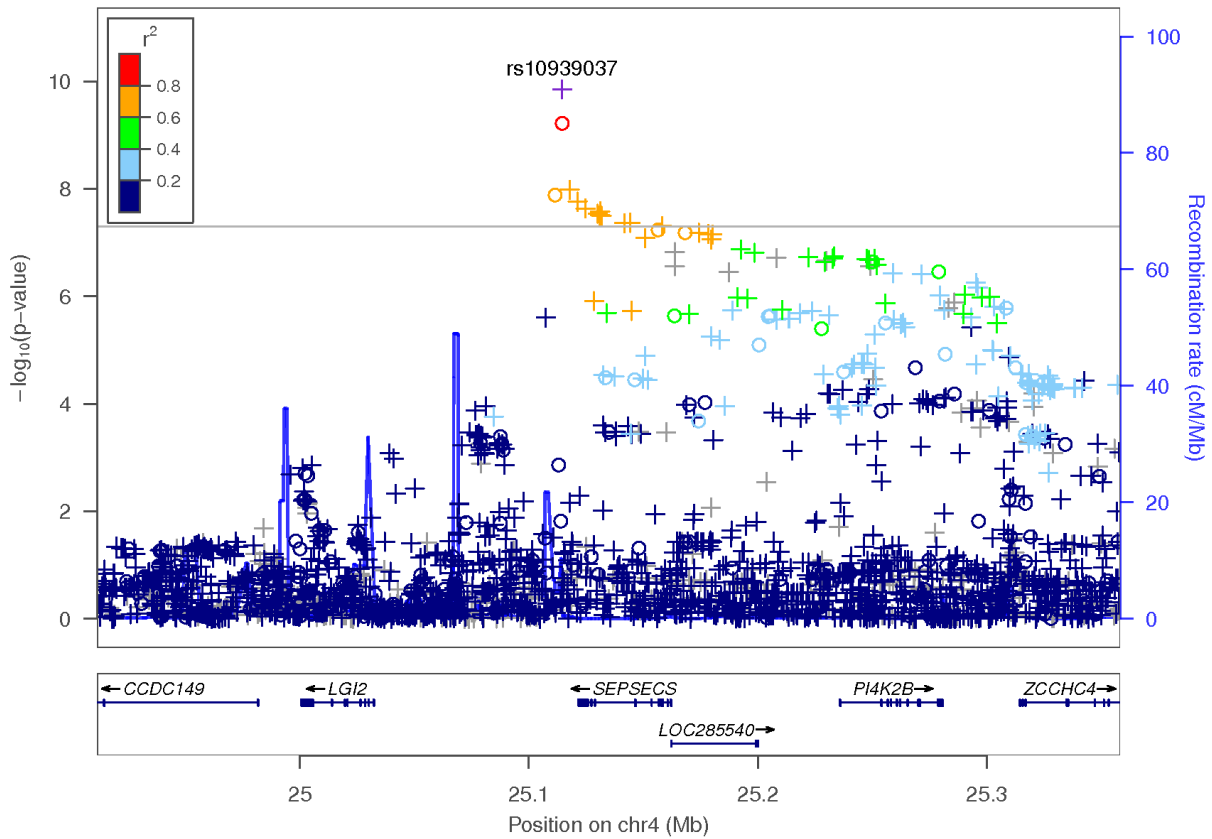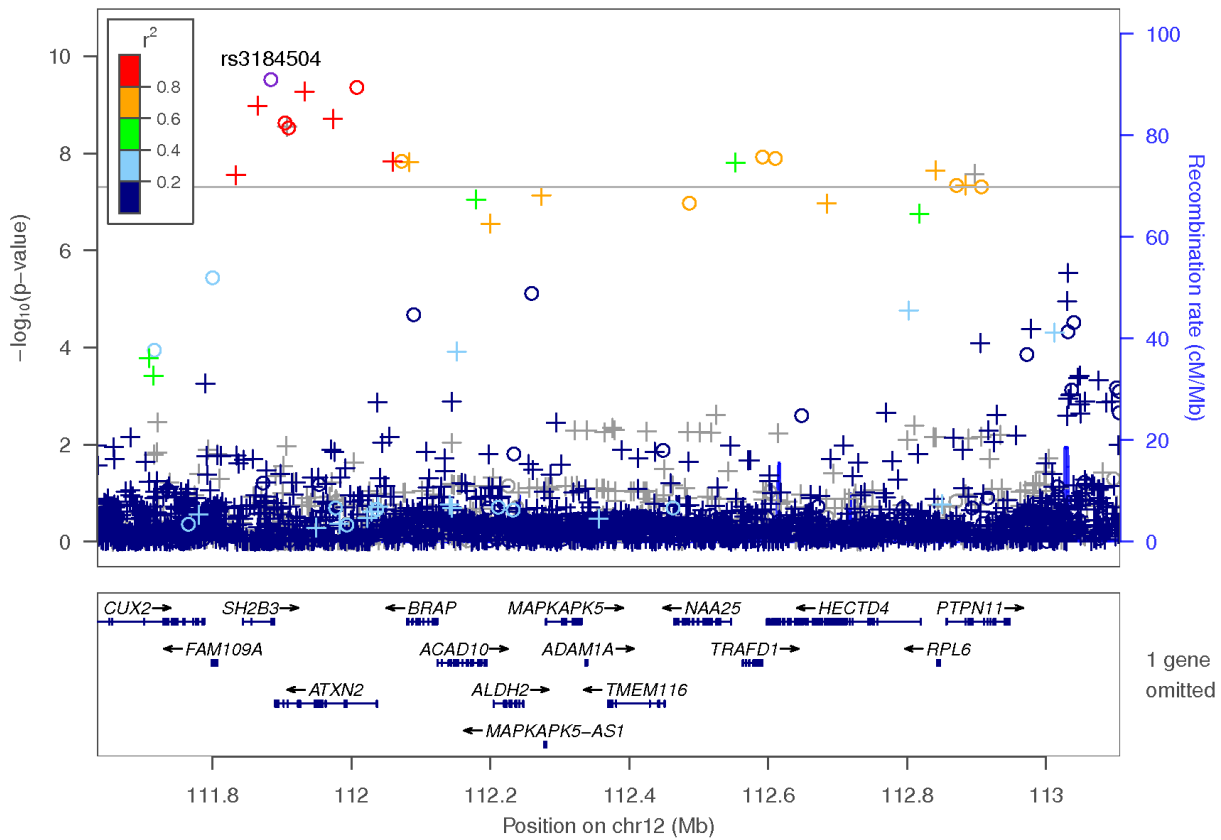



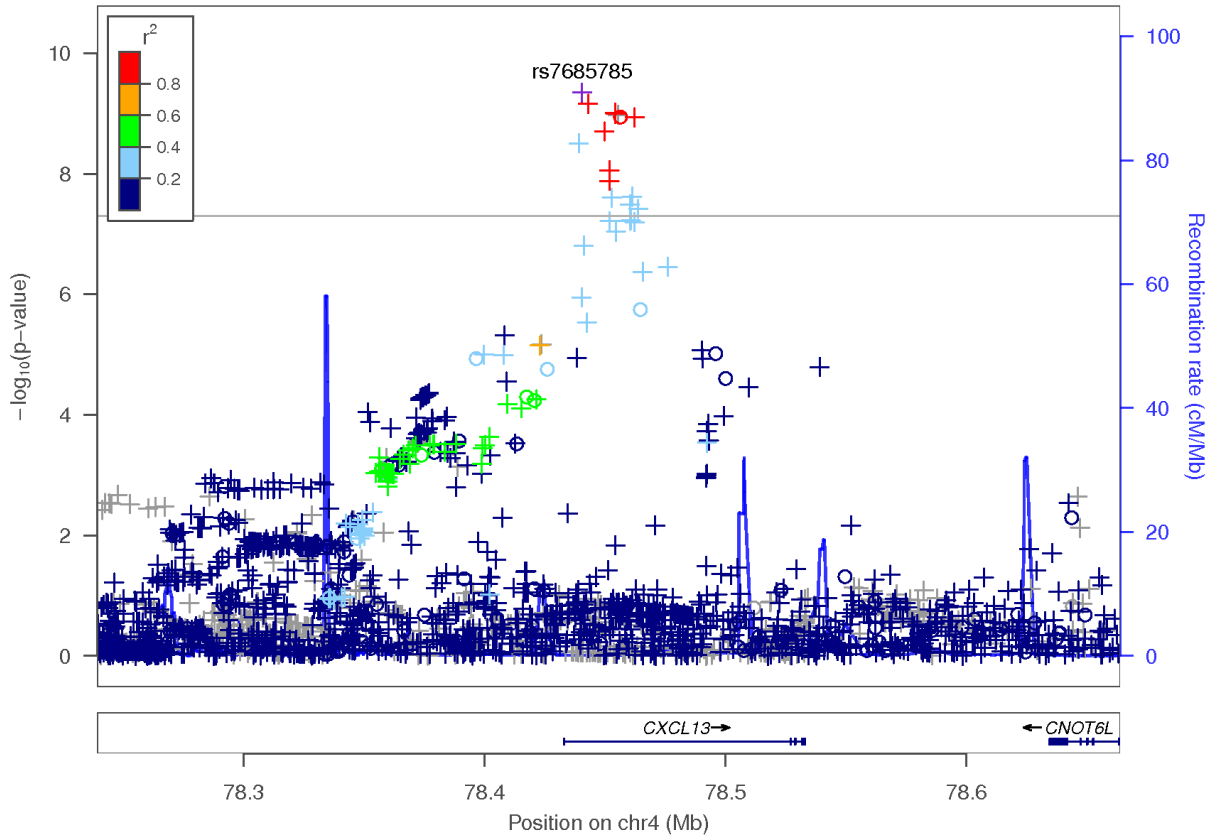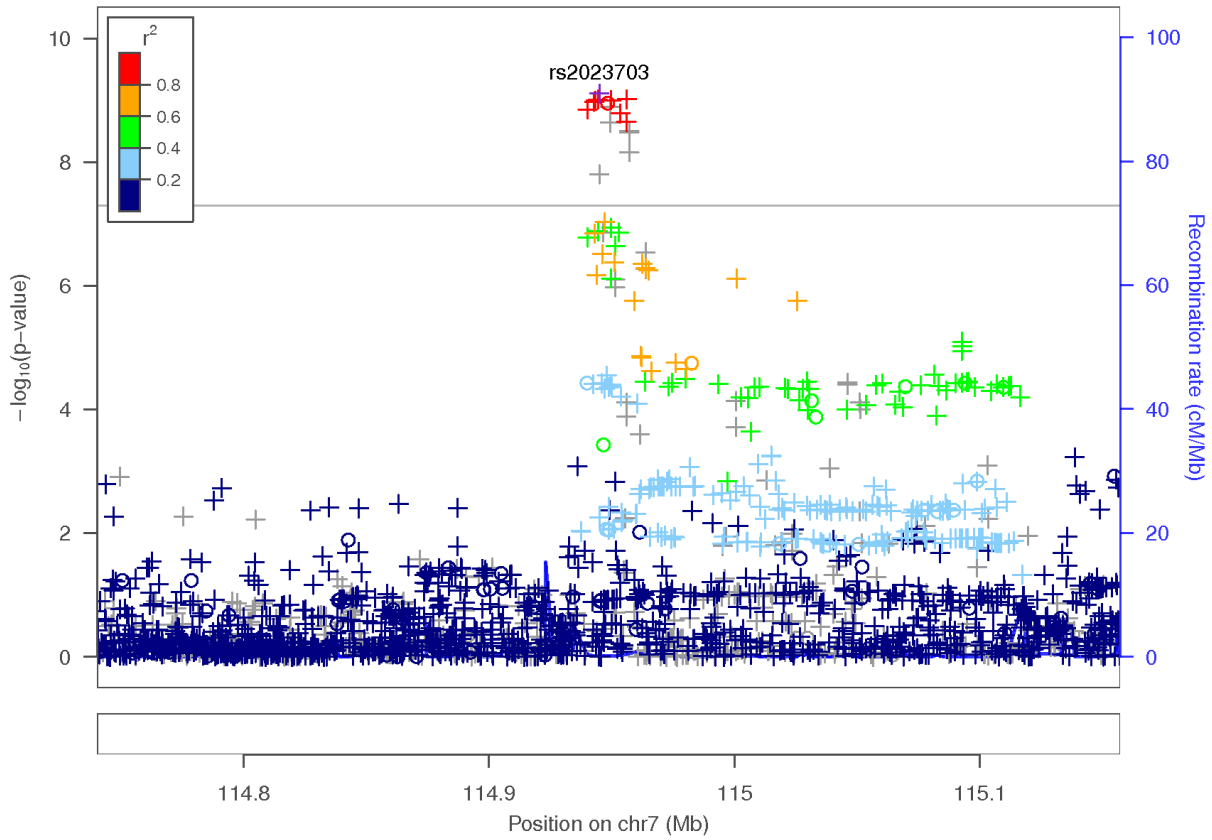

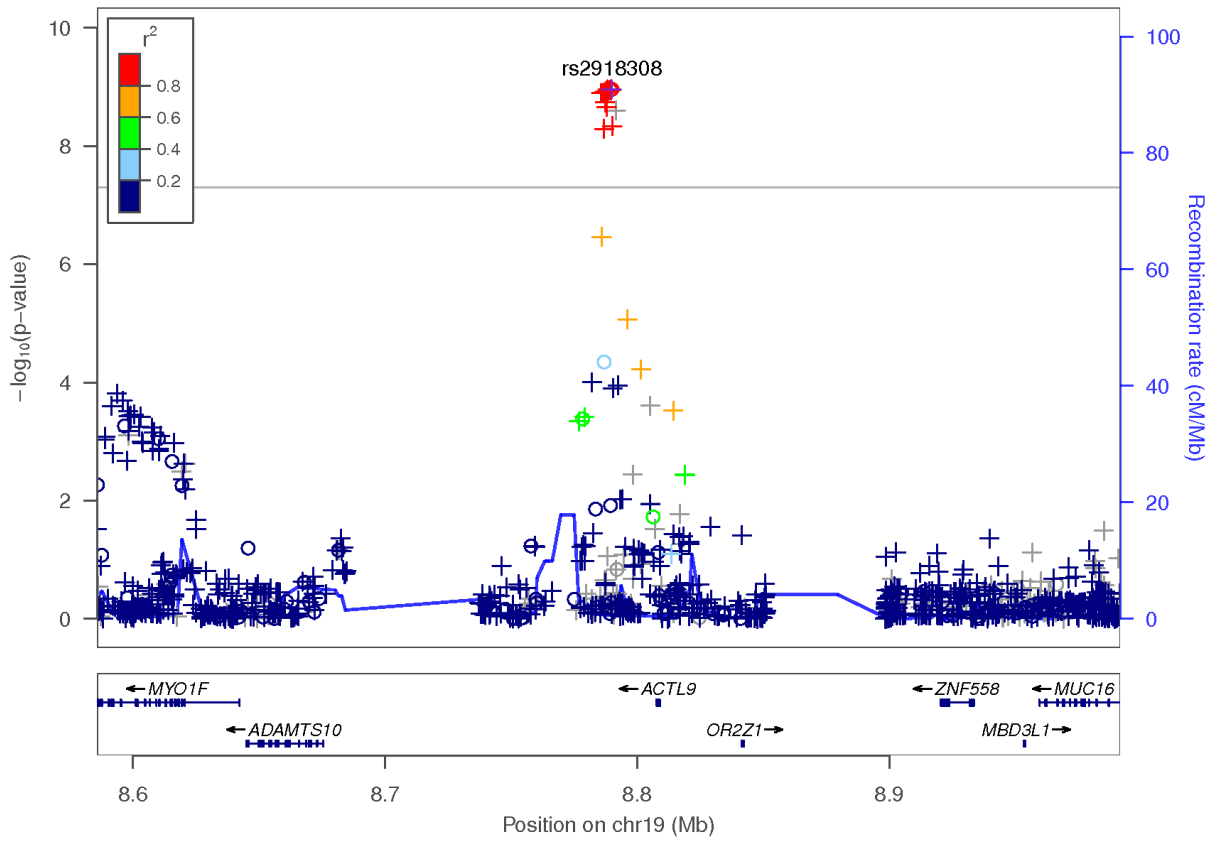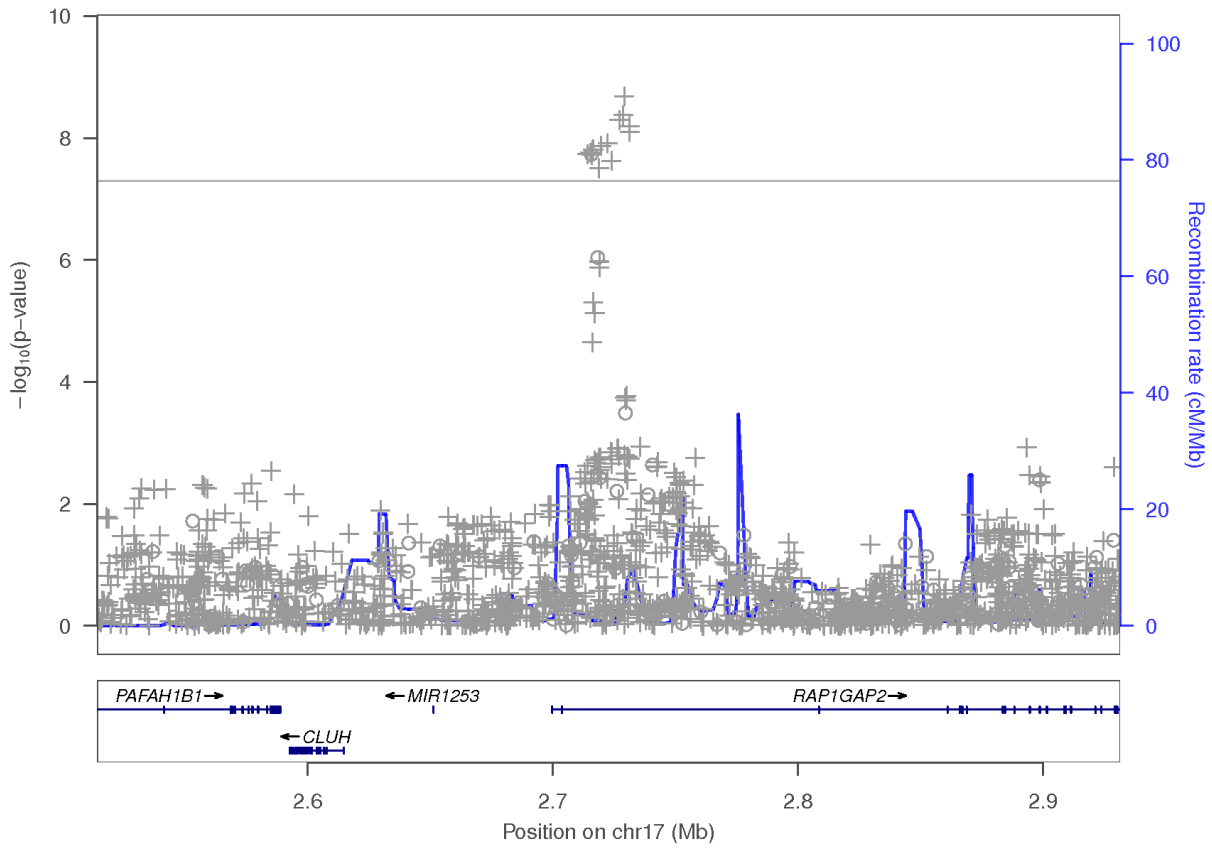

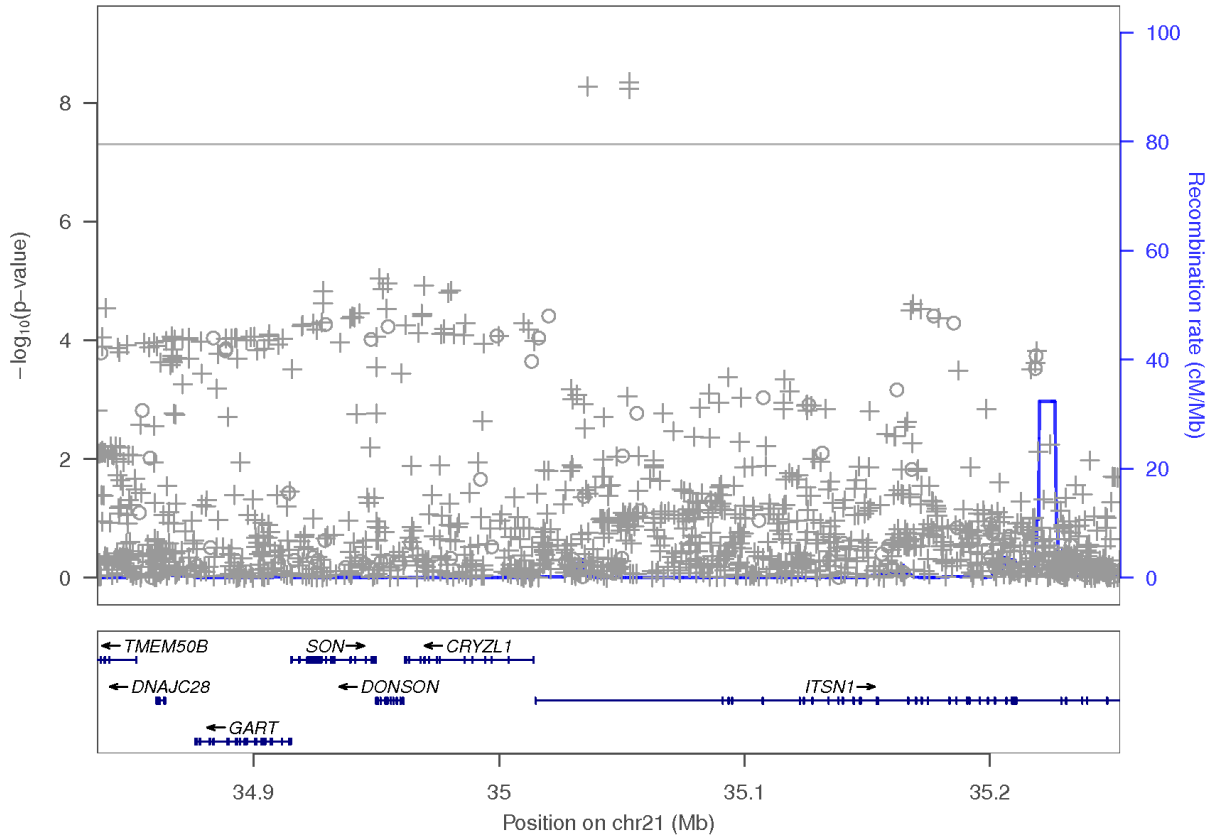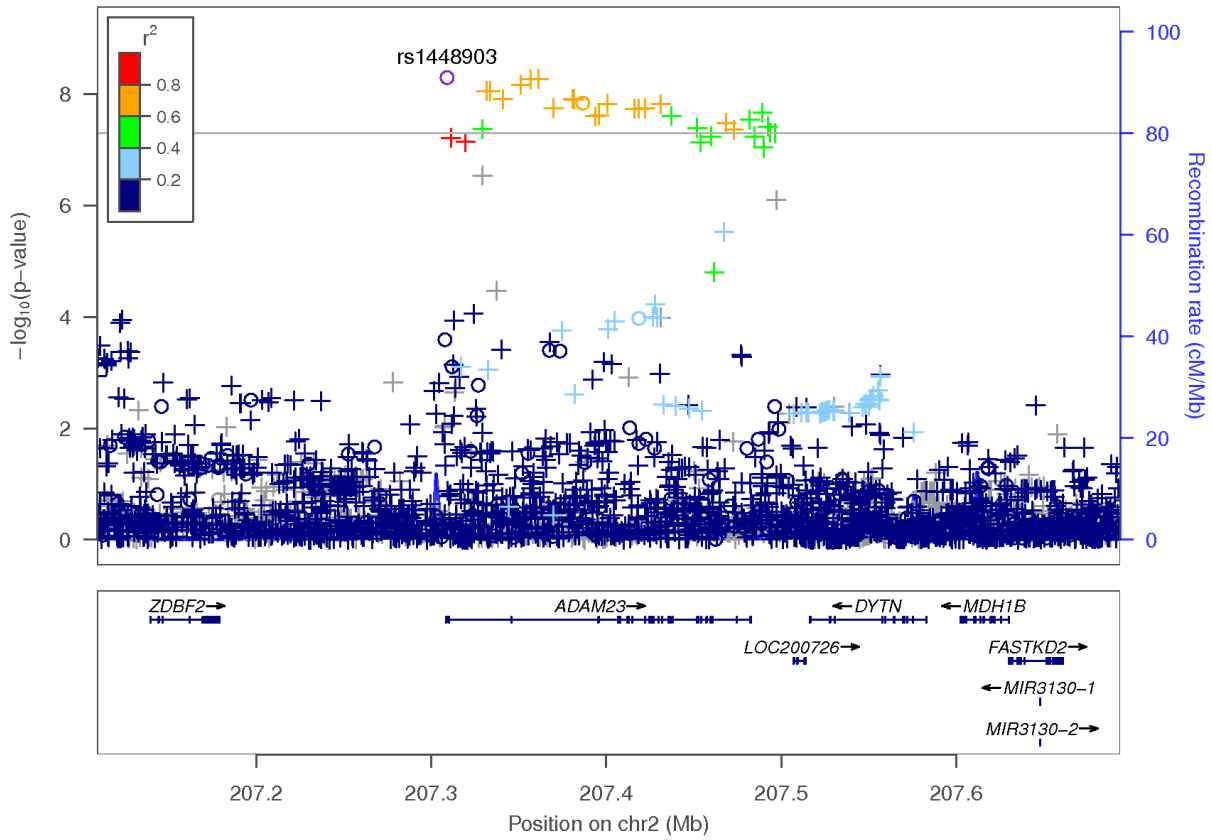

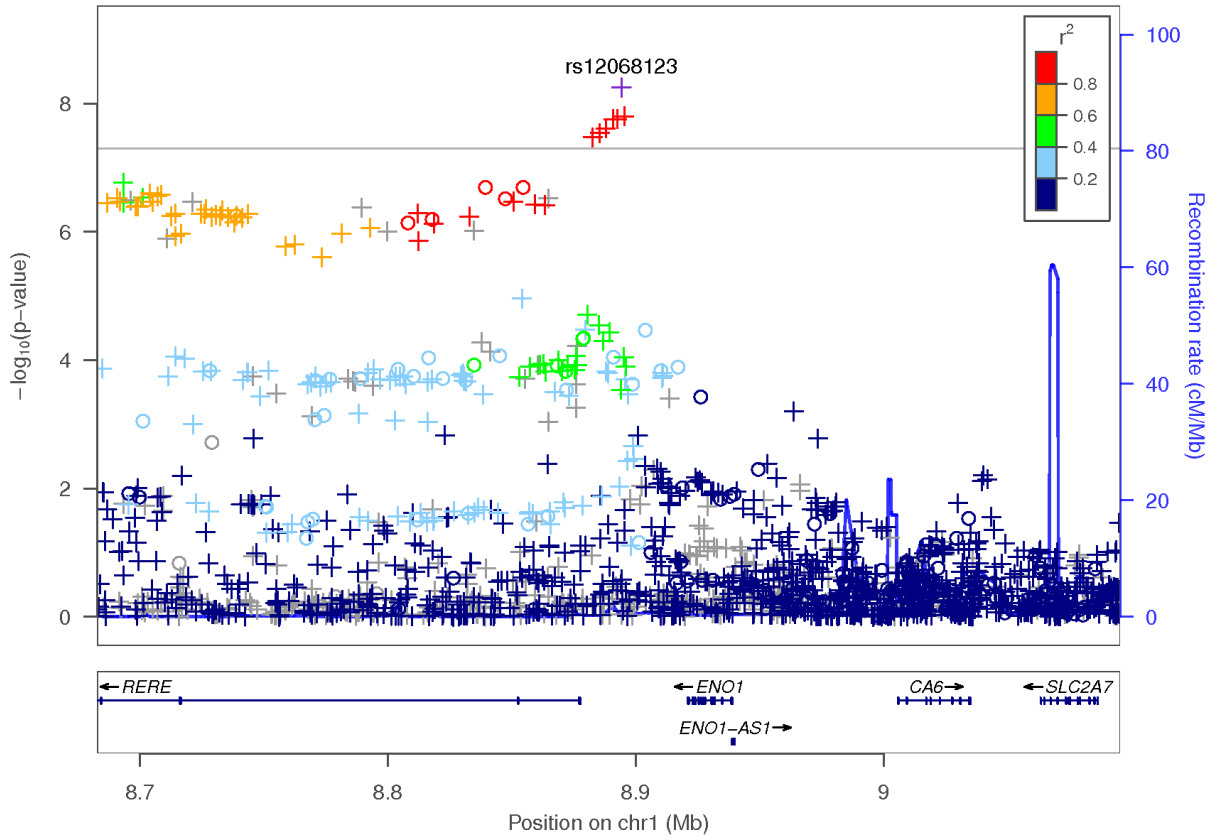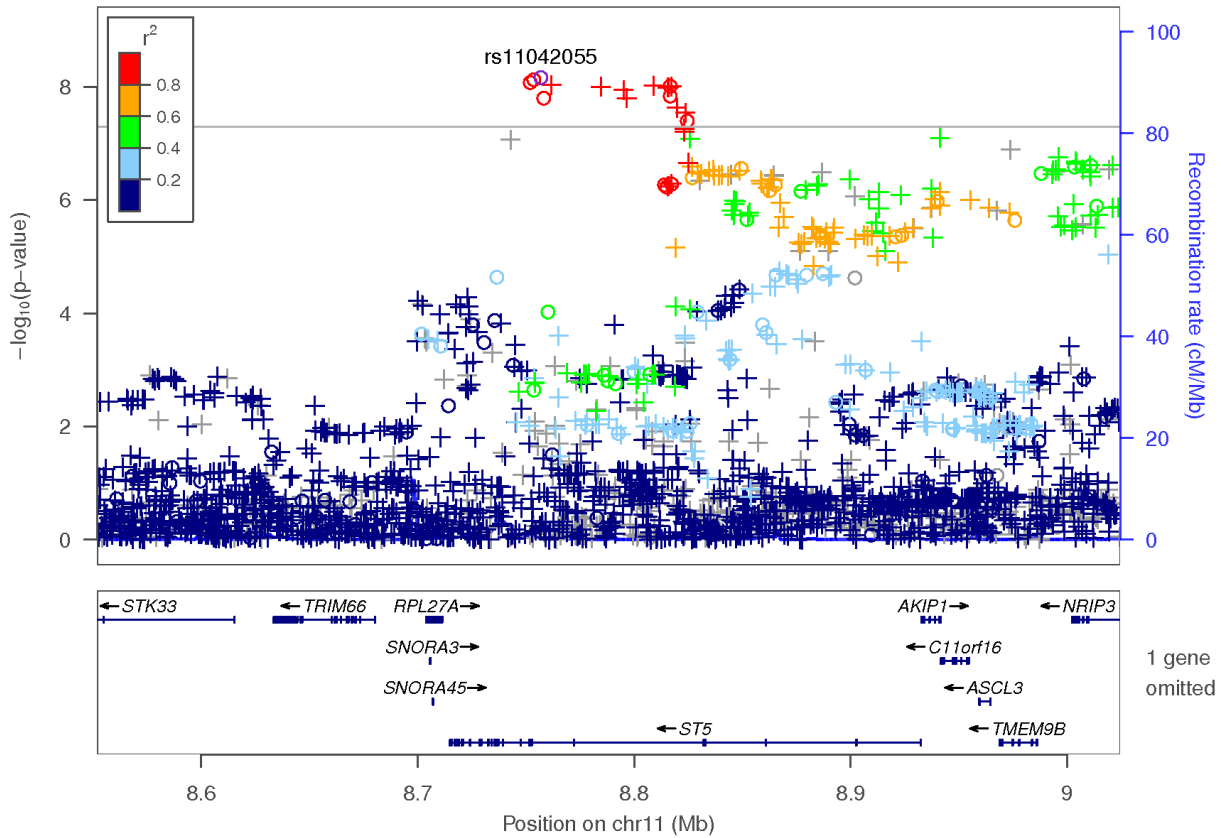

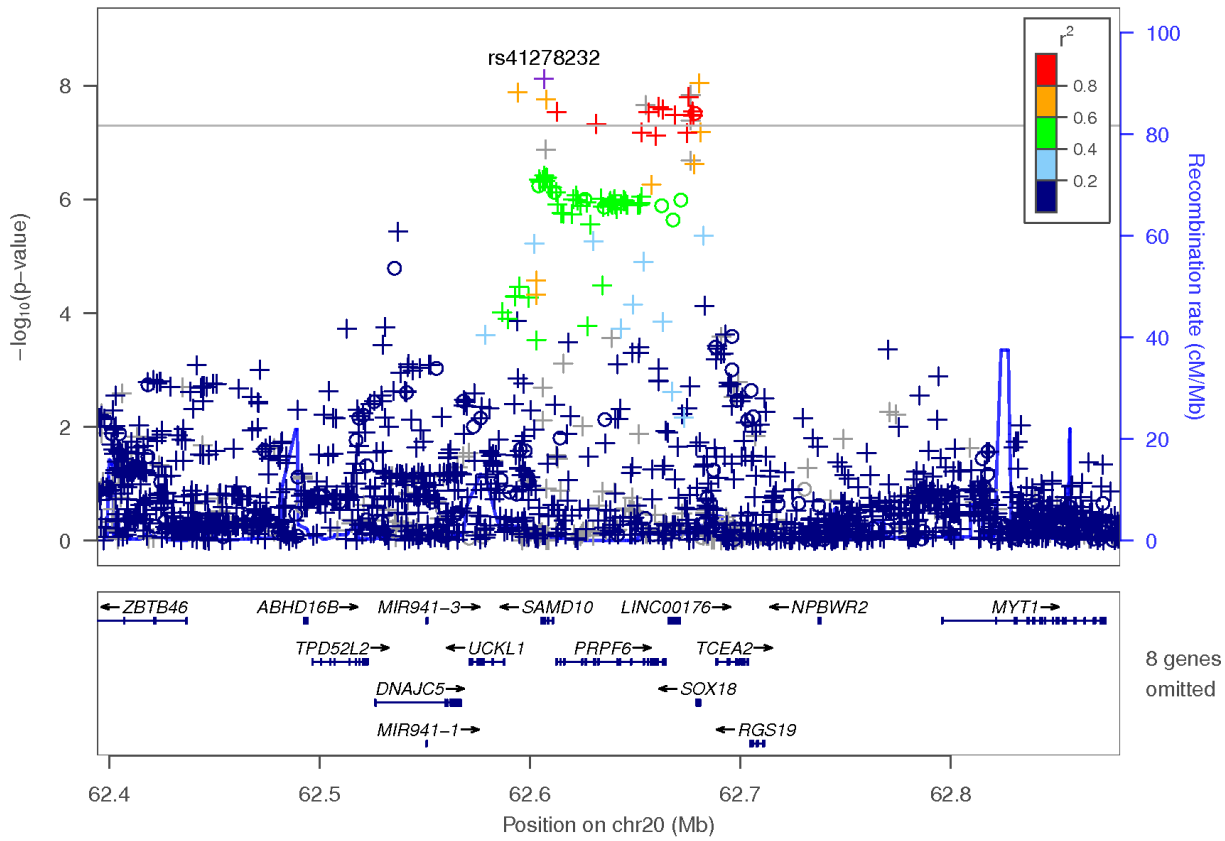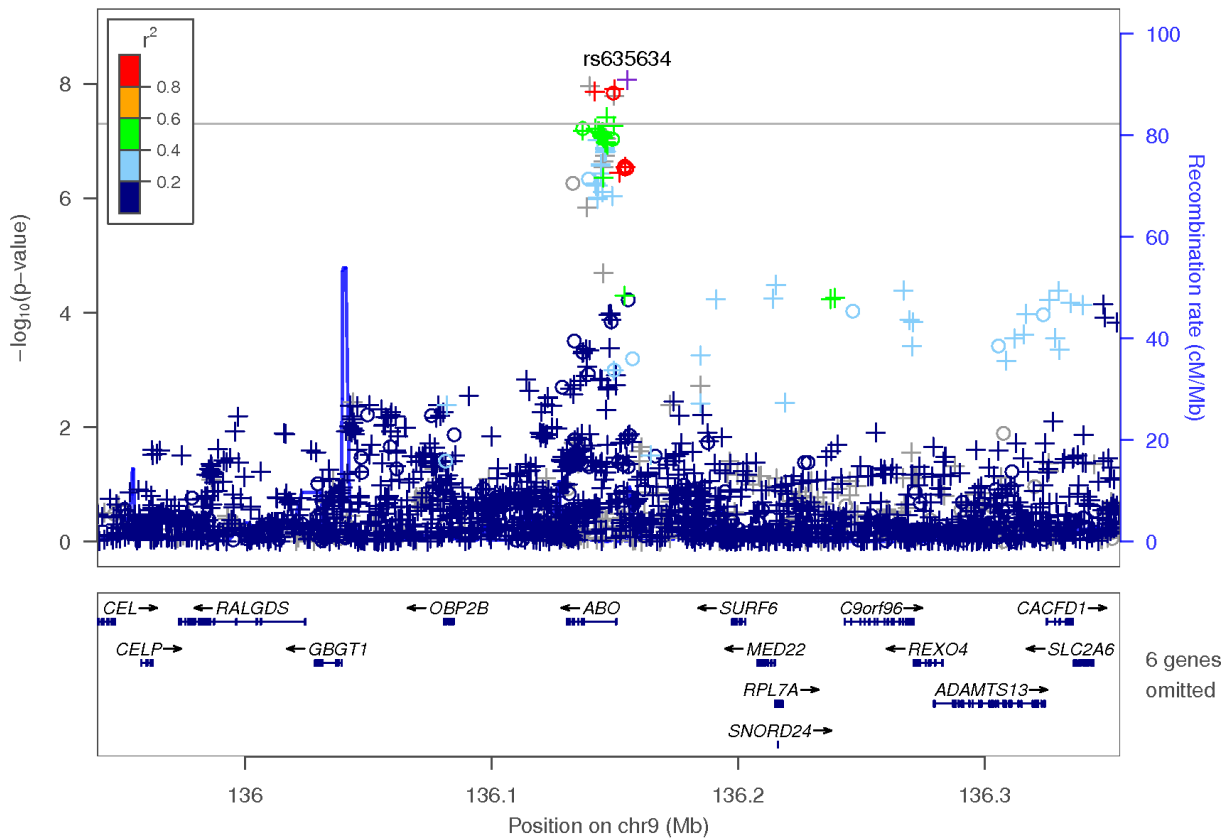

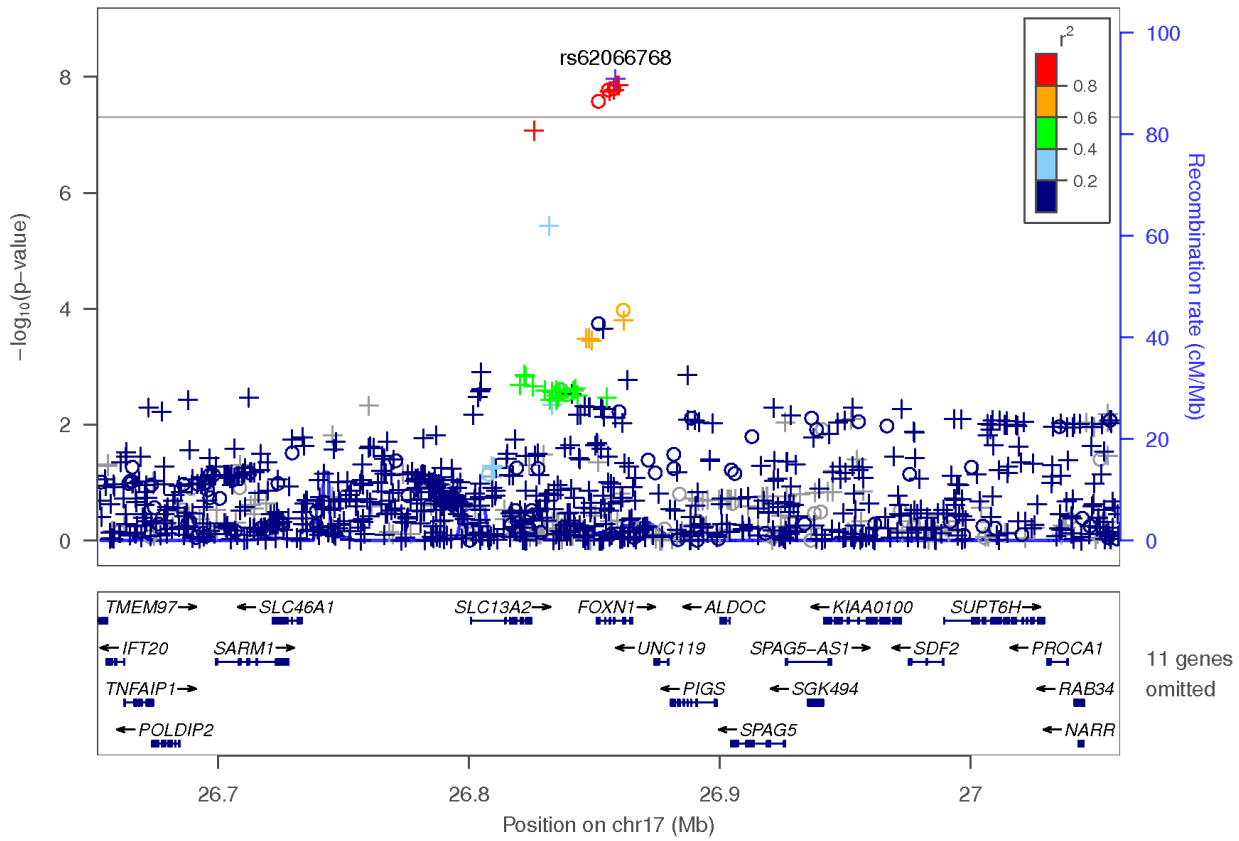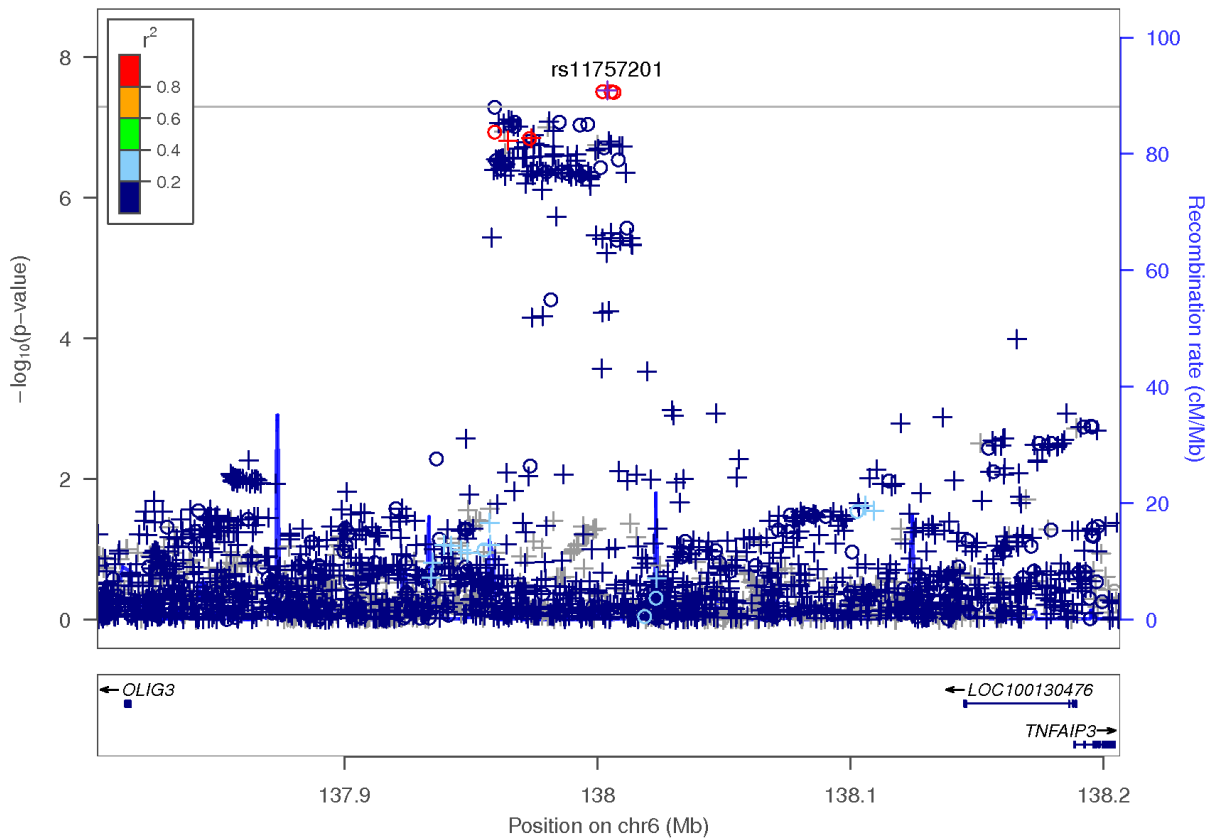

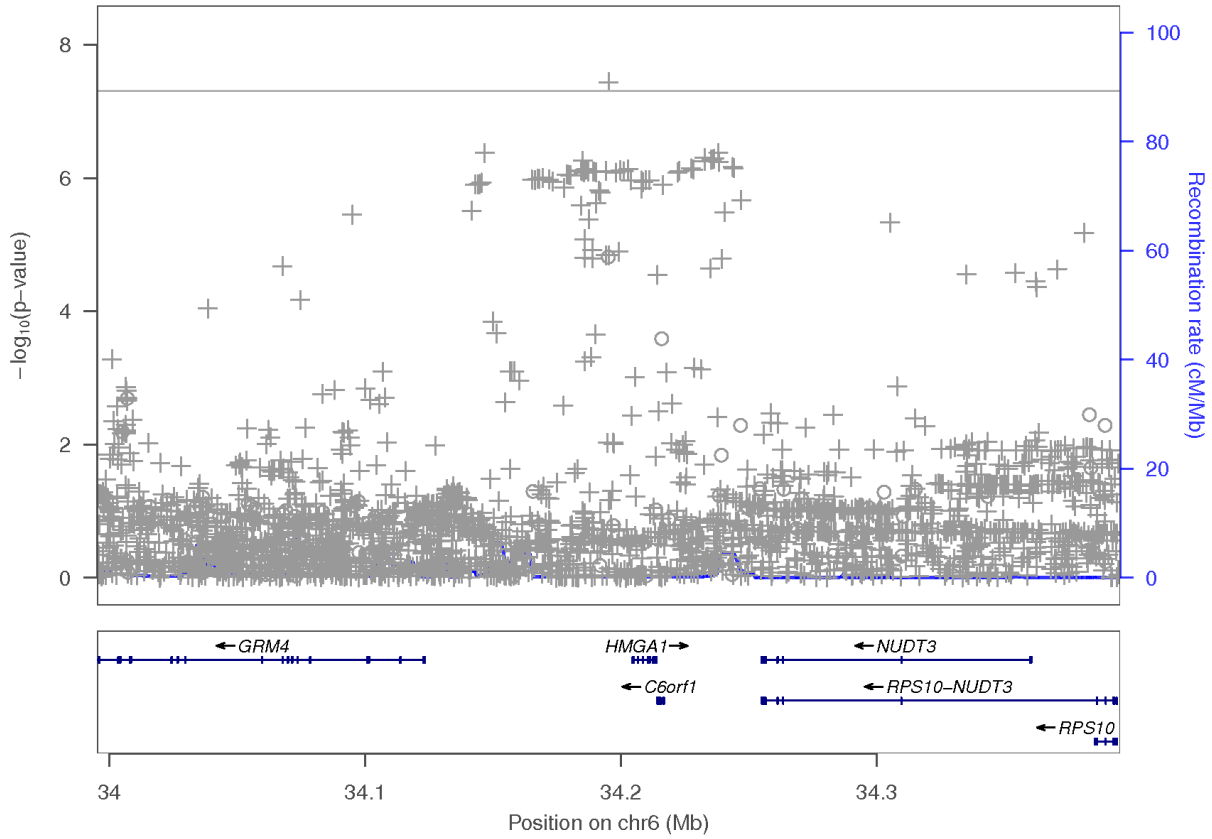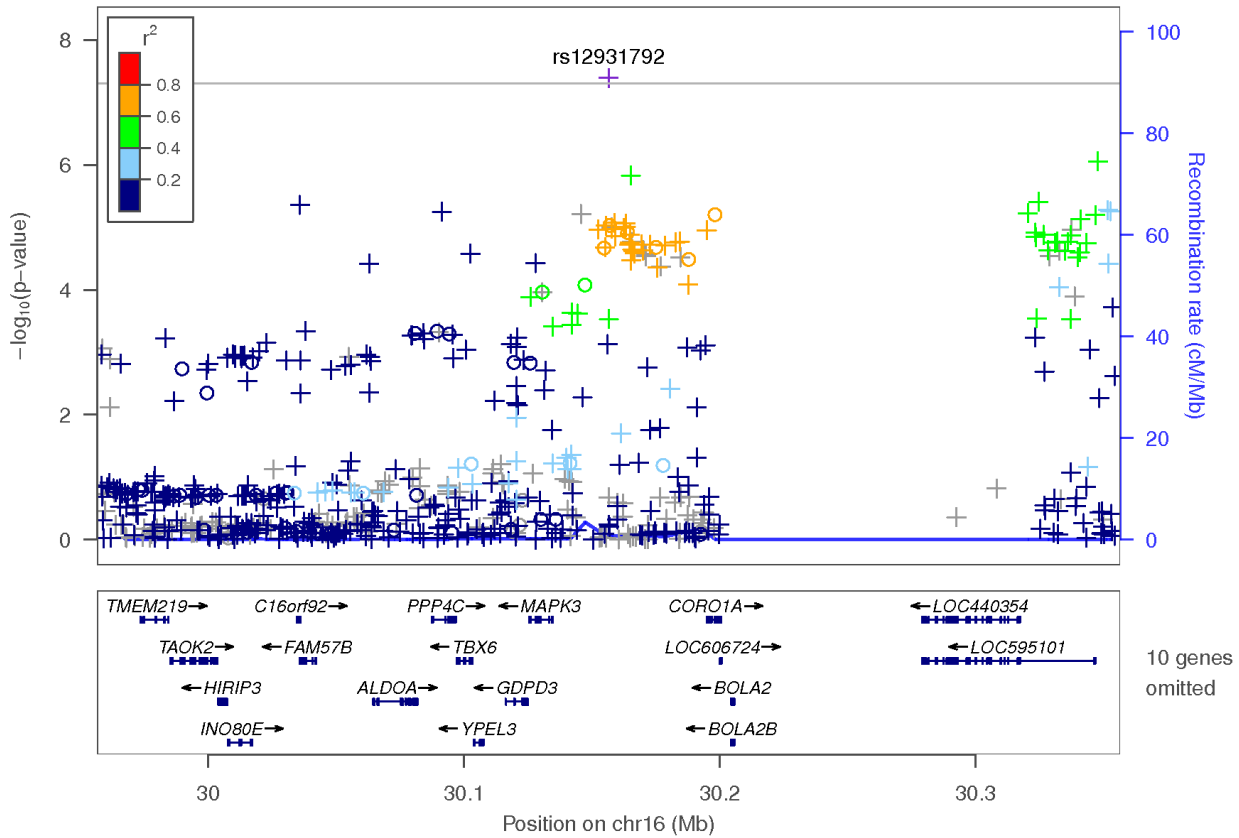

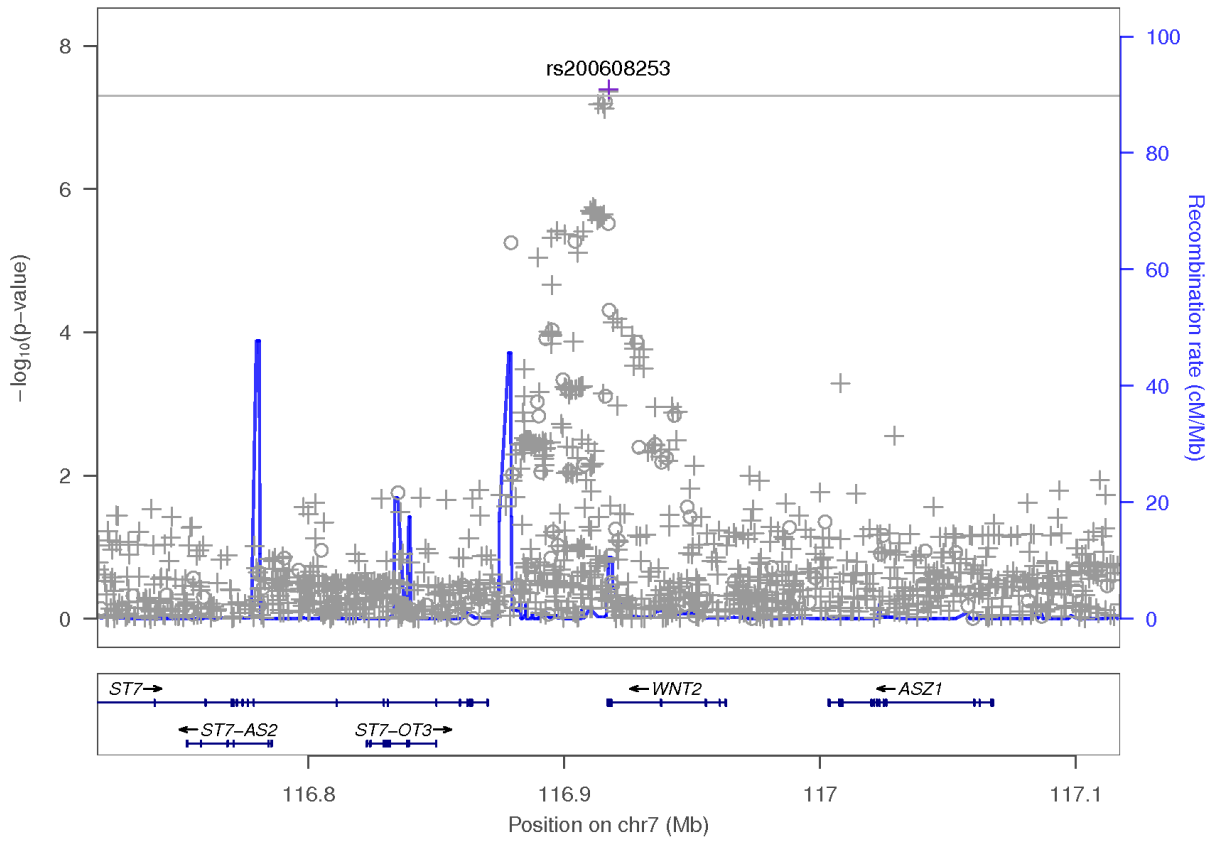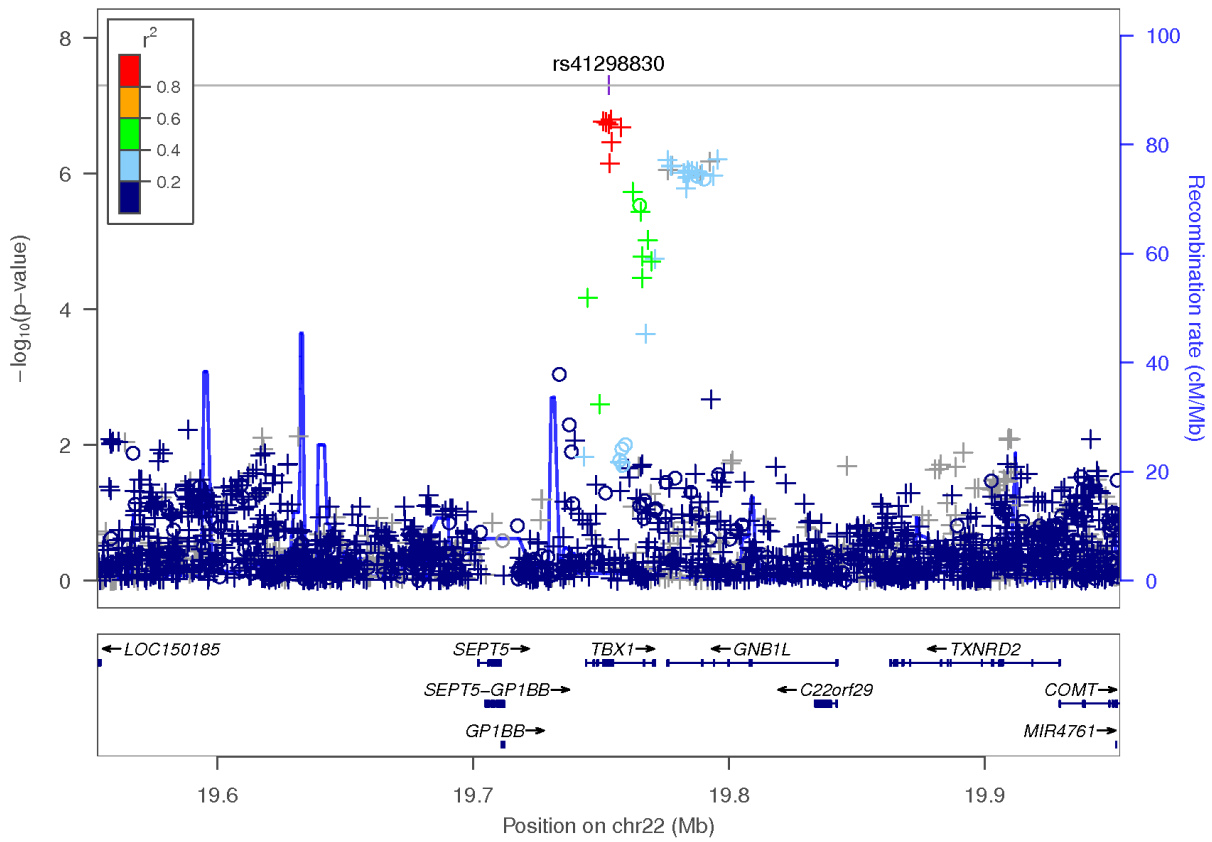

Supplement: NIHMS780506-supplement-16.pdf [file NIHMS780506-supplement-16.pdf]
