# Supplementary material
Source: PubMed Central journal article supplement (PMC5207801)

# Analysis Summary: Unibrow

## Phenotype Description

Data comes from the "Physical Features" survey:

- "Which image best matches the extent of your natural brow line (without hair removal)?"

Subjects match their eyebrow to one of four pictures. The resulting "unibrow" phenotype is scored from 0–3, with 0=no hair between the eyebrows and 3=lots of hair in between.

## Phenotype Statistics

The following table shows demographics of unrelated, European individuals included in the GWAS.

| Phenotype | Group  | Total | M     | F     | (0,30] | (30,45] | (45,60] | (60,Inf] |
|-----------|--------|-------|-------|-------|--------|---------|---------|----------|
| unibrow   | none   | 37652 | 18032 | 19620 | 4447   | 10555   | 10292   | 12358    |
|           | little | 26134 | 15256 | 10878 | 4746   | 9892    | 6235    | 5261     |
|           | some   | 5066  | 3497  | 1569  | 796    | 2020    | 1259    | 991      |
|           | lots   | 432   | 338   | 94    | 61     | 150     | 107     | 114      |

The following table shows the phenotypic distribution across 23andMe genotyping platforms for individuals included in the GWAS.

| Phenotype | Group  | Total | v1/v2 | v3    | v4   |
|-----------|--------|-------|-------|-------|------|
| unibrow   | none   | 37652 | 4505  | 31484 | 1663 |
|           | little | 26134 | 3063  | 21959 | 1112 |
|           | some   | 5066  | 666   | 4206  | 194  |
|           | lots   | 432   | 55    | 354   | 23   |

## Null Model with Covariates

The following table shows results of fitting a model for the trait based on just the covariates. Principal coordinates have been standardized, so these effect sizes are in units of standard deviations.

|      | Estimate | Std. Error | t value | Pr(> t )               |
|------|----------|------------|---------|------------------------|
| age  | -0.00594 | 0.000156   | -38.1   | 0.0                    |
| sexF | -0.16928 | 0.004911   | -34.5   | $3.5 \times 10^{-258}$ |
| pc.0 | -0.03161 | 0.002449   | -12.9   | $4.6 \times 10^{-38}$  |
| pc.1 | -0.01742 | 0.002460   | -7.1    | $1.5 \times 10^{-12}$  |
| pc.2 | 0.01843  | 0.002458   | 7.5     | $6.5 \times 10^{-14}$  |
| pc.3 | -0.00345 | 0.002452   | -1.4    | 0.16                   |
| pc.4 | -0.00339 | 0.002452   | -1.4    | 0.17                   |

## Q-Q plot of scaled residuals

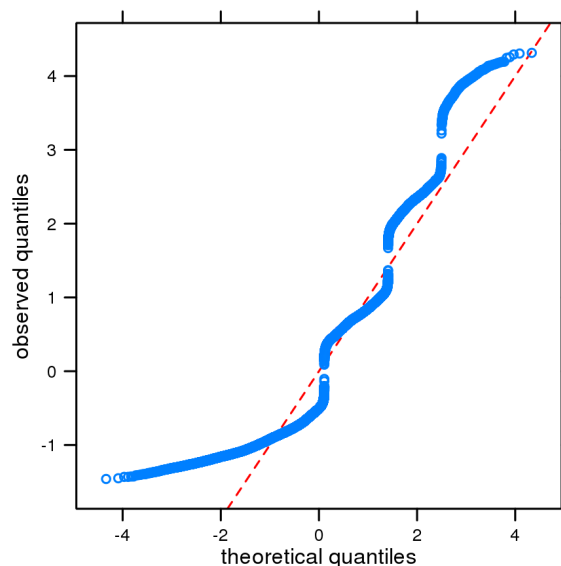

## SNP-level QC information

The following table shows results for QC filters on the genotyped data:

|                         | failed | passed  |
|-------------------------|--------|---------|
| no filters              | 0      | 1030430 |
| not V1-only, chrM, chrY | 4790   | 1025640 |
| parent-offspring test   | 2129   | 1023511 |
| MAF > 0%                | 3203   | 1020494 |
| HWE > 1e-20             | 48225  | 972832  |
| gt.rate > 90%           | 30775  | 952826  |
| batch effects           | 28267  | 945446  |

The following table shows results for QC filters on the imputed dosage data:

|                    | failed | passed   |
|--------------------|--------|----------|
| no filters         | 0      | 13733809 |
| MAF > 0%           | 0      | 13733809 |
| imputation quality | 0      | 13733809 |
| batch effects      | 2168   | 13731641 |

The following table shows results for QC filters on the merged association test results:

|                | passed   | total    |
|----------------|----------|----------|
| imputed only   | 12833621 | 12833621 |
| both passed    | 898002   | 13731623 |
| genotyped only | 47444    | 13779067 |
| no test result | -16606   | 13762461 |
| MAF < 0.1%     | -1722970 | 12039491 |

## Genetic Association Tests

We performed linear regression assuming an additive model for allelic effects, using the model:

$$unibrow \sim age + sex + pc.0 + pc.1 + pc.2 + pc.3 + pc.4 + genotype$$

This genome-wide association analysis includes data from 69284 individuals of European ancestry, filtered to remove close relatives.

The results in this report have been adjusted for a genomic control inflation factor  $\lambda=1.106$ . The equivalent inflation factor rescaled for a sample size of 2000 would be  $\lambda_{2000}=1.003$ , and for 20000,  $\lambda_{20000}=1.031$ .

## Manhattan Plot

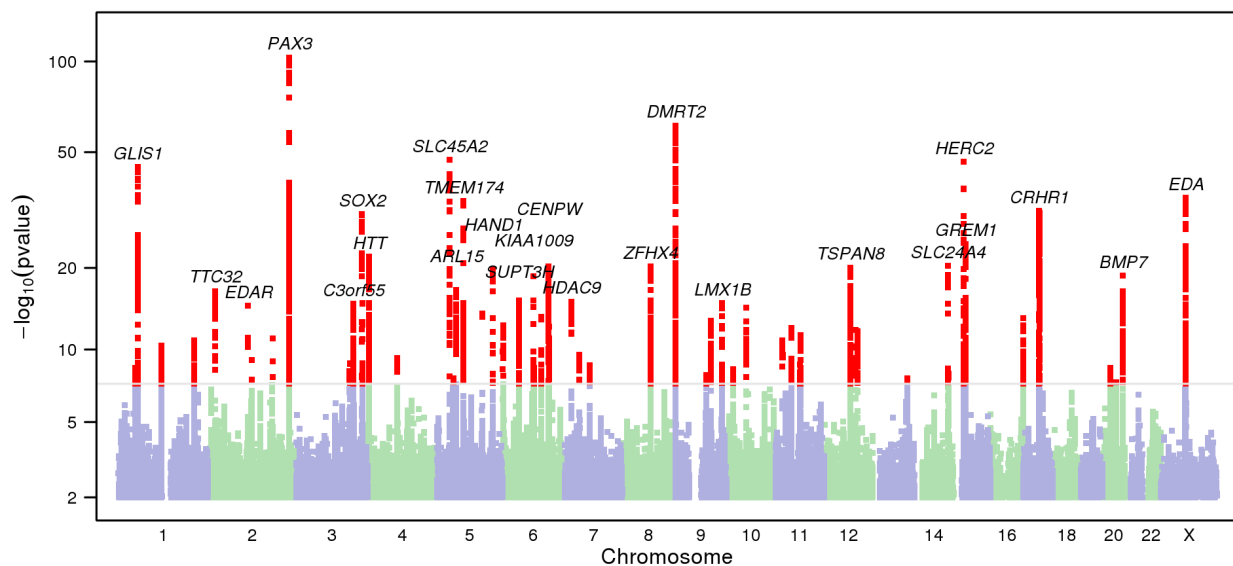

# Q-Q Plot of GWAS Results

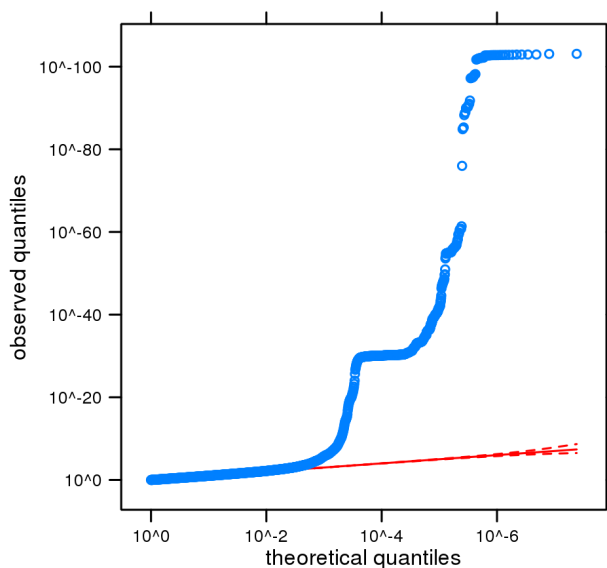

## Index SNPs for Strongest Associations

| cytoband | assay.name       | scaffold | position  | alleles | src | pvalue                 | effect | 95% CI          | gene.context        |
|----------|------------------|----------|-----------|---------|-----|------------------------|--------|-----------------|---------------------|
| 2q36.1   | rs2053316        | chr2     | 223094489 | C/T     | I   | 7.9×10 <sup>-104</sup> | 0.149  | [0.135,0.162]   | [PAX3]              |
| 9p24.3   | rs7861975        | chr9     | 1121353   | C/T     | I   | 4.2×10 <sup>-62</sup>  | 0.064  | [0.056,0.071]   | DMRT2--[--SMARCA2   |
| 5p13.2   | rs16891982       | chr5     | 33951693  | C/G     | I   | 6.8×10 <sup>-48</sup>  | -0.148 | [-0.168,-0.128] | [SLC45A2]           |
| 15q13.1  | rs12916300       | chr15    | 28410491  | C/T     | I   | 4.6×10 <sup>-47</sup>  | -0.067 | [-0.077,-0.058] | [HERC2]             |
| 1p32.3   | rs702490         | chr1     | 54195018  | A/G     | I   | 2.4×10 <sup>-45</sup>  | -0.055 | [-0.063,-0.047] | [GLIS1]             |
| Xq13.1   | rs2804362        | chrX     | 69001854  | A/G     | I   | 8.9×10 <sup>-36</sup>  | -0.037 | [-0.043,-0.031] | [EDA]               |
| 5q13.2   | rs6881396        | chr5     | 72559339  | G/T     | I   | 6.7×10 <sup>-35</sup>  | -0.046 | [-0.054,-0.039] | TMEM174--[--FOXD1   |
| 17q21.31 | 17:43849572:AT_A | chr17    | 43849572  | D/I     | I   | 2.8×10 <sup>-32</sup>  | -0.052 | [-0.061,-0.044] | LRRC37A3---[--CRHR1 |
| 3q26.33  | rs1345417        | chr3     | 181511951 | C/G     | I   | 1.7×10 <sup>-31</sup>  | 0.047  | [0.039,0.055]   | SOX2--[--ATP11B     |
| 15q13.3  | rs3743103        | chr15    | 33025627  | C/T     | I   | 5.3×10 <sup>-25</sup>  | -0.038 | [-0.045,-0.031] | [GREM1]             |
| 4p16.3   | rs6828882        | chr4     | 3166196   | C/G     | I   | 1.3×10 <sup>-22</sup>  | -0.059 | [-0.071,-0.048] | [HTT]               |
| 14q32.12 | rs4144266        | chr14    | 92789205  | A/G     | I   | 4.2×10 <sup>-21</sup>  | -0.036 | [-0.043,-0.028] | CPSF2---[--SLC24A4  |
| 8q21.11  | rs7837649        | chr8     | 77658645  | A/G     | I   | 6.0×10 <sup>-21</sup>  | -0.046 | [-0.056,-0.036] | [ZFHX4]             |
| 6q22.32  | rs72422730       | chr6     | 126825885 | D/I     | I   | 6.4×10 <sup>-21</sup>  | -0.035 | [-0.042,-0.027] | CENPW---[--RSPO3    |
| 12q15    | rs4760786        | chr12    | 71446789  | C/T     | I   | 8.7×10 <sup>-21</sup>  | 0.037  | [0.029,0.044]   | PTPRR---[--TSPAN8   |
| 5q33.2   | rs199955185      | chr5     | 153938270 | D/I     | I   | 1.8×10 <sup>-20</sup>  | -0.036 | [-0.043,-0.028] | HAND1--[--LARP1     |
| 20q13.31 | rs230203         | chr20    | 55791615  | C/T     | I   | 1.7×10 <sup>-19</sup>  | -0.034 | [-0.041,-0.027] | [BMP7]              |
| 6q14.3   | rs9449896        | chr6     | 85118988  | A/C     | I   | 1.9×10 <sup>-19</sup>  | -0.044 | [-0.053,-0.034] | KIAA1009---[--TBX18 |
| 5q11.2   | rs1553477        | chr5     | 53116966  | A/C     | I   | 2.3×10 <sup>-17</sup>  | -0.031 | [-0.038,-0.024] | NDUFS4---[--ARL15   |
| 2p24.1   | rs12467812       | chr2     | 19995470  | A/G     | I   | 3.3×10 <sup>-17</sup>  | 0.033  | [0.025,0.040]   | OSR1---[--TTC32     |
| 6p21.1   | rs7227833        | chr6     | 44681840  | C/G     | I   | 5.6×10 <sup>-16</sup>  | 0.033  | [0.025,0.042]   | CDC5L---[--SUPT3H   |
| 7p21.1   | rs1178101        | chr7     | 18737197  | A/C     | I   | 7.3×10 <sup>-16</sup>  | 0.039  | [0.029,0.048]   | [HDAC9]             |
| 9q33.3   | rs3829849        | chr9     | 129390800 | C/T     | I   | 1.2×10 <sup>-15</sup>  | 0.030  | [0.023,0.038]   | [LMX1B]             |
| 3q25.32  | rs67922471       | chr3     | 157510696 | D/I     | I   | 1.4×10 <sup>-15</sup>  | -0.029 | [-0.036,-0.022] | C3orf55---[--SHOX2  |
| 2q12.3   | rs3827760        | chr2     | 109513601 | A/G     | I   | 2.4×10 <sup>-15</sup>  | 0.165  | [0.124,0.206]   | [EDAR]              |
| 10q21.1  | rs7905367        | chr10    | 54334653  | C/G     | I   | 4.4×10 <sup>-15</sup>  | -0.038 | [-0.047,-0.028] | DKK1---[--MBL2      |
| 5q23.2   | rs4476718        | chr5     | 124075470 | C/T     | I   | 2.2×10 <sup>-14</sup>  | -0.037 | [-0.047,-0.028] | [ZNF608]            |
| 6q21     | rs61123157       | chr6     | 106613530 | C/T     | I   | 4.6×10 <sup>-14</sup>  | 0.028  | [0.021,0.035]   | PRDM1--[--ATG5      |
| 16q24.3  | rs78498439       | chr16    | 89967514  | A/G     | I   | 6.9×10 <sup>-14</sup>  | 0.079  | [0.059,0.100]   | [TCF25]             |
| 9q22.32  | rs199883506      | chr9     | 98277366  | D/I     | I   | 1.3×10 <sup>-13</sup>  | -0.035 | [-0.044,-0.026] | PTCH1-[---ERCC6L2   |
| 6p25.2   | rs7763441        | chr6     | 2452697   | G/T     | I   | 4.3×10 <sup>-13</sup>  | 0.027  | [0.020,0.034]   | GMDS---[--C6orf195  |
| 11p11.2  | rs66716358       | chr11    | 44330610  | C/T     | I   | 7.6×10 <sup>-13</sup>  | -0.027 | [-0.034,-0.019] | [ALX4]              |
| 12q21.31 | rs11609649       | chr12    | 85576492  | A/G     | I   | 1.3×10 <sup>-12</sup>  | 0.033  | [0.024,0.043]   | [LRR1Q1]            |
| 12q21.33 | rs11105799       | chr12    | 91153721  | C/T     | I   | 1.8×10 <sup>-12</sup>  | 0.028  | [0.021,0.036]   | [---CCER1           |
| 11q13.3  | rs10626466       | chr11    | 69683380  | D/I     | I   | 4.6×10 <sup>-12</sup>  | 0.026  | [0.019,0.033]   | FGF3--[--ANO1       |
| 2q31.1   | rs970797         | chr2     | 177111819 | G/T     | I   | 9.0×10 <sup>-12</sup>  | -0.025 | [-0.032,-0.018] | HOXD1--[--MTX2      |
| 1q32.2   | rs7542091        | chr1     | 210031948 | C/G     | I   | 1.5×10 <sup>-11</sup>  | -0.026 | [-0.033,-0.018] | DIEXF-[---SYT14     |
| 11p15.1  | rs10500859       | chr11    | 19740731  | C/G     | I   | 1.5×10 <sup>-11</sup>  | -0.041 | [-0.053,-0.029] | [NAV2]              |
| 9q22.32  | rs111677654      | chr9     | 98877903  | C/T     | I   | 3.8×10 <sup>-11</sup>  | -0.032 | [-0.042,-0.023] | [LOC158434]         |
| 1p12     | rs6676180        | chr1     | 119783223 | A/T     | I   | 4.3×10 <sup>-11</sup>  | 0.025  | [0.018,0.033]   | WARS2--[--HAO2      |
| 6p25.3   | rs12203592       | chr6     | 396321    | C/T     | I   | 1.4×10 <sup>-10</sup>  | 0.031  | [0.022,0.041]   | [IRF4]              |
| 7p14.1   | rs72328411       | chr7     | 40319239  | D/I     | I   | 2.9×10 <sup>-10</sup>  | -0.075 | [-0.099,-0.052] | [C7orf10]           |
| 4q21.21  | rs3796606        | chr4     | 81194090  | A/G     | I   | 5.5×10 <sup>-10</sup>  | 0.023  | [0.016,0.030]   | [FGF5]              |
| 2q14.2   | rs11694441       | chr2     | 119541381 | A/C     | I   | 8.4×10 <sup>-10</sup>  | 0.037  | [0.025,0.049]   | INSIG2---[--EN1     |
| 3q24     | rs76036841       | chr3     | 147804236 | A/G     | I   | 1.5×10 <sup>-9</sup>   | 0.057  | [0.039,0.076]   | ZIC1---[--AGTR1     |
| 11q13.2  | rs138341189      | chr11    | 68224411  | D/I     | I   | 1.9×10 <sup>-9</sup>   | 0.035  | [0.023,0.046]   | LRP5-[---PPP6R3     |

|          |             |       |          |     |   |                      |        |                 |                  |
|----------|-------------|-------|----------|-----|---|----------------------|--------|-----------------|------------------|
| 7q11.22  | rs3094901   | chr7  | 69937950 | C/T | I | 2.2×10 <sup>-9</sup> | -0.022 | [-0.029,-0.015] | [AUTS2]          |
| 20p11.22 | rs6082544   | chr20 | 21868713 | A/G | I | 3.5×10 <sup>-9</sup> | -0.023 | [-0.030,-0.015] | PAX1---[---FOXA2 |
| 1p33     | rs1267303   | chr1  | 46990457 | A/G | I | 3.6×10 <sup>-9</sup> | 0.025  | [0.016,0.033]   | DMBX1--[---KNCN  |
| 10p12.33 | rs113334738 | chr10 | 18271858 | A/G | I | 4.3×10 <sup>-9</sup> | 0.030  | [0.020,0.040]   | [SLC39A12]       |

## Quality Statistics for Index SNPs

| assay.name       | is.v2 | is.v3 | is.v4 | gt.rate | hw.p.value            | p.date                | freq.b | avg.rsqr | min.rsqr | p.batch               | dose.b | qc.mask |
|------------------|-------|-------|-------|---------|-----------------------|-----------------------|--------|----------|----------|-----------------------|--------|---------|
| rs2053316        | FALSE | FALSE | FALSE |         |                       |                       |        | 0.9648   | 0.9335   | 0.22                  | 0.0770 | v2v3v4  |
| rs7861975        | FALSE | TRUE  | FALSE | 0.9381  | 1.2×10 <sup>-74</sup> | 1.9×10 <sup>-56</sup> | 0.6223 | 0.9935   | 0.9919   | 0.014                 | 0.6484 | v2v3v4  |
| rs16891982       | TRUE  | TRUE  | TRUE  | 0.9997  | 4.3×10 <sup>-20</sup> | 0.11                  | 0.9573 | 0.9954   | 0.9915   | 1.8×10 <sup>-42</sup> | 0.9494 | v3      |
| rs12916300       | FALSE | FALSE | FALSE |         |                       |                       |        | 0.7854   | 0.7531   | 2.5×10 <sup>-37</sup> | 0.7077 | v2v3v4  |
| rs702490         | FALSE | FALSE | FALSE |         |                       |                       |        | 0.9710   | 0.8626   | 0.077                 | 0.6567 | v2v3v4  |
| rs2804362        | FALSE | FALSE | FALSE |         |                       |                       |        | 0.9925   | 0.9836   | 0.0034                | 0.5398 | v2v3v4  |
| rs6881396        | FALSE | FALSE | FALSE |         |                       |                       |        | 0.9627   | 0.9510   | 0.0072                | 0.5980 | v2v3v4  |
| 17:43849572:AT_A | FALSE | FALSE | FALSE |         |                       |                       |        | 0.9774   | 0.9747   | 0.26                  | 0.7749 | v2v3v4  |
| rs1345417        | FALSE | FALSE | FALSE |         |                       |                       |        | 0.8573   | 0.4988   | 0.56                  | 0.5895 | v2v3v4  |
| rs3743103        | FALSE | TRUE  | FALSE | 0.9998  | 0.88                  | 0.018                 | 0.5786 | 0.9926   | 0.9729   | 0.22                  | 0.5797 | v2v3v4  |
| rs6828882        | FALSE | FALSE | FALSE |         |                       |                       |        | 0.9781   | 0.9742   | 0.017                 | 0.1042 | v2v3v4  |
| rs4144266        | FALSE | FALSE | FALSE |         |                       |                       |        | 0.9458   | 0.8976   | 8.2×10 <sup>-5</sup>  | 0.4434 | v2v3v4  |
| rs7837649        | FALSE | FALSE | FALSE |         |                       |                       |        | 0.9842   | 0.9784   | 0.73                  | 0.8324 | v2v3v4  |
| rs72422730       | FALSE | FALSE | FALSE |         |                       |                       |        | 0.9785   | 0.9762   | 0.00014               | 0.5362 | v2v3v4  |
| rs4760786        | FALSE | FALSE | FALSE |         |                       |                       |        | 0.9946   | 0.9931   | 0.00020               | 0.6834 | v2v3v4  |
| rs199955185      | FALSE | FALSE | FALSE |         |                       |                       |        | 0.9065   | 0.8736   | 0.0017                | 0.4142 | v2v3v4  |
| rs230203         | FALSE | FALSE | FALSE |         |                       |                       |        | 0.9322   | 0.9211   | 0.045                 | 0.4475 | v2v3v4  |
| rs9449896        | FALSE | FALSE | FALSE |         |                       |                       |        | 0.9872   | 0.9706   | 0.0044                | 0.1671 | v2v3v4  |
| rs1553477        | FALSE | FALSE | FALSE |         |                       |                       |        | 0.9894   | 0.9520   | 0.093                 | 0.5395 | v2v3v4  |
| rs12467812       | TRUE  | FALSE | FALSE | 0.9997  | 0.38                  | 0.63                  | 0.3330 | 0.9806   | 0.9553   | 0.017                 | 0.3300 | v2v3v4  |
| rs227833         | FALSE | FALSE | FALSE |         |                       |                       |        | 0.9995   | 0.9965   | 0.46                  | 0.7368 | v2v3v4  |
| rs1178101        | FALSE | FALSE | FALSE |         |                       |                       |        | 0.9936   | 0.9892   | 0.056                 | 0.8233 | v2v3v4  |
| rs3829849        | TRUE  | TRUE  | TRUE  | 0.9998  | 0.054                 | 0.048                 | 0.3584 | 0.9993   | 0.9988   | 0.41                  | 0.3598 | v2v3v4  |
| rs67922471       | FALSE | FALSE | FALSE |         |                       |                       |        | 0.9781   | 0.9667   | 0.19                  | 0.4837 | v2v3v4  |
| rs3827760        | TRUE  | TRUE  | TRUE  | 1.0000  | 0.13                  | 0.0089                | 0.0077 | 0.9883   | 0.9711   | 0.013                 | 0.0081 | v2v3v4  |
| rs7905367        | FALSE | FALSE | FALSE |         |                       |                       |        | 0.8414   | 0.8082   | 0.0015                | 0.2193 | v2v3v4  |
| rs4476718        | FALSE | FALSE | FALSE |         |                       |                       |        | 0.9678   | 0.8677   | 1.5×10 <sup>-15</sup> | 0.8316 | v2v3v4  |
| rs61123157       | FALSE | FALSE | FALSE |         |                       |                       |        | 0.9879   | 0.9613   | 0.62                  | 0.4053 | v2v3v4  |
| rs78498439       | FALSE | FALSE | FALSE |         |                       |                       |        | 0.6209   | 0.6043   | 4.7×10 <sup>-9</sup>  | 0.9498 | v2v3v4  |
| rs199883506      | FALSE | FALSE | FALSE |         |                       |                       |        | 0.8928   | 0.8076   | 0.86                  | 0.7940 | v2v3v4  |
| rs7763441        | FALSE | FALSE | FALSE |         |                       |                       |        | 0.9946   | 0.9857   | 0.11                  | 0.5874 | v2v3v4  |
| rs66716358       | FALSE | FALSE | FALSE |         |                       |                       |        | 0.9619   | 0.8614   | 0.065                 | 0.4935 | v2v3v4  |
| rs11609649       | TRUE  | TRUE  | TRUE  | 0.9998  | 0.72                  | 0.30                  | 0.8153 | 0.9998   | 0.9996   | 0.64                  | 0.8154 | v2v3v4  |
| rs11105799       | FALSE | FALSE | FALSE |         |                       |                       |        | 0.9912   | 0.9510   | 0.11                  | 0.2854 | v2v3v4  |
| rs10626466       | FALSE | FALSE | FALSE |         |                       |                       |        | 0.9538   | 0.9397   | 0.34                  | 0.4181 | v2v3v4  |
| rs970797         | TRUE  | TRUE  | TRUE  | 0.9997  | 0.45                  | 0.0039                | 0.4326 | 0.9997   | 0.9993   | 0.093                 | 0.4334 | v2v3v4  |
| rs7542091        | FALSE | FALSE | FALSE |         |                       |                       |        | 0.9685   | 0.9549   | 0.91                  | 0.6254 | v2v3v4  |
| rs10500859       | FALSE | FALSE | FALSE |         |                       |                       |        | 0.9393   | 0.9267   | 0.35                  | 0.1058 | v2v3v4  |
| rs111677654      | FALSE | FALSE | FALSE |         |                       |                       |        | 0.9843   | 0.9723   | 0.28                  | 0.1674 | v2v3v4  |
| rs6676180        | FALSE | FALSE | FALSE |         |                       |                       |        | 0.9712   | 0.9066   | 0.0043                | 0.6325 | v2v3v4  |
| rs12203592       | TRUE  | TRUE  | TRUE  | 1.0000  | 9.7×10 <sup>-37</sup> | 0.014                 | 0.1728 | 0.9923   | 0.9819   | 4.2×10 <sup>-6</sup>  | 0.1705 | v2v3v4  |
| rs72328411       | FALSE | FALSE | FALSE |         |                       |                       |        | 0.9681   | 0.9134   | 0.56                  | 0.9757 | v2v3v4  |
| rs3796606        | TRUE  | TRUE  | TRUE  | 0.9994  | 0.051                 | 0.031                 | 0.4191 | 0.9996   | 0.9993   | 0.54                  | 0.4196 | v2v3v4  |
| rs11694441       | FALSE | FALSE | FALSE |         |                       |                       |        | 0.8667   | 0.8546   | 0.0048                | 0.8841 | v2v3v4  |
| rs76036841       | FALSE | FALSE | FALSE |         |                       |                       |        | 0.6946   | 0.6507   | 0.0081                | 0.0544 | v2v3v4  |
| rs138341189      | FALSE | FALSE | FALSE |         |                       |                       |        | 0.8640   | 0.8551   | 0.97                  | 0.8691 | v2v3v4  |
| rs3094901        | FALSE | FALSE | FALSE |         |                       |                       |        | 0.9978   | 0.9953   | 0.83                  | 0.4956 | v2v3v4  |
| rs6082544        | FALSE | FALSE | FALSE |         |                       |                       |        | 0.9232   | 0.9194   | 0.014                 | 0.5640 | v2v3v4  |
| rs1267303        | FALSE | TRUE  | FALSE | 0.9989  | 0.16                  | 0.13                  | 0.2558 | 0.9882   | 0.9561   | 0.0024                | 0.2585 | v2v3v4  |
| rs113334738      | FALSE | FALSE | FALSE |         |                       |                       |        | 0.9894   | 0.9786   | 0.15                  | 0.8487 | v2v3v4  |

## SNP Statistics in the GWAS Sample

| assay.name       | AA.0  | AB.0  | BB.0  | im.num.0 | dose.b.0 |
|------------------|-------|-------|-------|----------|----------|
| rs2053316        |       |       |       | 69284    | 0.0781   |
| rs7861975        | 7294  | 26600 | 19082 | 69284    | 0.6437   |
| rs16891982       | 154   | 5312  | 63817 | 57281    | 0.9598   |
| rs12916300       |       |       |       | 69284    | 0.7177   |
| rs702490         |       |       |       | 69284    | 0.6588   |
| rs2804362        |       |       |       | 69284    | 0.5353   |
| rs6881396        |       |       |       | 69284    | 0.5963   |
| 17:43849572:AT_A |       |       |       | 69284    | 0.7759   |
| rs1345417        |       |       |       | 69284    | 0.5890   |
| rs3743103        | 10247 | 28347 | 19398 | 69284    | 0.5796   |
| rs6828882        |       |       |       | 69284    | 0.1015   |
| rs4144266        |       |       |       | 69284    | 0.4517   |
| rs7837649        |       |       |       | 69284    | 0.8334   |
| rs72422730       |       |       |       | 69284    | 0.5394   |
| rs4760786        |       |       |       | 69284    | 0.6788   |
| rs199955185      |       |       |       | 69284    | 0.4116   |
| rs230203         |       |       |       | 69284    | 0.4477   |
| rs9449896        |       |       |       | 69284    | 0.1712   |
| rs1553477        |       |       |       | 69284    | 0.5408   |
| rs12467812       | 4810  | 4778  | 1165  | 69284    | 0.3278   |
| rs227833         |       |       |       | 69284    | 0.7379   |
| rs1178101        |       |       |       | 69284    | 0.8246   |
| rs3829849        | 28491 | 31865 | 8912  | 69284    | 0.3591   |
| rs67922471       |       |       |       | 69284    | 0.4833   |
| rs3827760        | 68056 | 1052  | 7     | 69284    | 0.0078   |
| rs7905367        |       |       |       | 69284    | 0.2180   |
| rs4476718        |       |       |       | 69284    | 0.8290   |

|             |       |       |       |       |        |
|-------------|-------|-------|-------|-------|--------|
| rs61123157  |       |       |       | 69284 | 0.4051 |
| rs78498439  |       |       |       | 69284 | 0.9497 |
| rs199883506 |       |       |       | 69284 | 0.7957 |
| rs7763441   |       |       |       | 69284 | 0.5892 |
| rs66716358  |       |       |       | 69284 | 0.4932 |
| rs11609649  | 2333  | 20802 | 46141 | 69284 | 0.8165 |
| rs11105799  |       |       |       | 69284 | 0.2829 |
| rs10626466  |       |       |       | 69284 | 0.4213 |
| rs970797    | 22352 | 34078 | 12833 | 69284 | 0.4313 |
| rs7542091   |       |       |       | 69284 | 0.6233 |
| rs10500859  |       |       |       | 69284 | 0.1054 |
| rs111677654 |       |       |       | 69284 | 0.1679 |
| rs6676180   |       |       |       | 69284 | 0.6312 |
| rs12203592  | 47467 | 19486 | 2327  | 69284 | 0.1747 |
| rs72328411  |       |       |       | 69284 | 0.9757 |
| rs3796606   | 23402 | 33779 | 12076 | 69284 | 0.4182 |
| rs11694441  |       |       |       | 69284 | 0.8815 |
| rs76036841  |       |       |       | 69284 | 0.0556 |
| rs138341189 |       |       |       | 69284 | 0.8679 |
| rs3094901   |       |       |       | 69284 | 0.4917 |
| rs6082544   |       |       |       | 69284 | 0.5636 |
| rs1267303   | 32122 | 21981 | 3826  | 69284 | 0.2574 |
| rs113334738 |       |       |       | 69284 | 0.8498 |

## Annotations from NHGRI GWAS Catalog

The following table shows, for each index SNP, all entries in the NHGRI GWAS Catalog that are within 500kb and in at least moderate linkage disequilibrium ( $r^2 > 0.5$ ).

| region   | position  | our.name   | our.pval              | dist    | rsqr  | assay.name | pvalue                 | pubmed.id | trait                                                    | genes            |
|----------|-----------|------------|-----------------------|---------|-------|------------|------------------------|-----------|----------------------------------------------------------|------------------|
| 5p13.2   | 33951693  | rs16891982 | $6.8 \times 10^{-48}$ | 0       | 1.000 | rs16891982 | $4.0 \times 10^{-20}$  | 20585627  | Hair color                                               | SLC45A2          |
| 5p13.2   | 33951693  | rs16891982 | $6.8 \times 10^{-48}$ | 0       | 1.000 | rs16891982 | $1.0 \times 10^{-12}$  | 20585627  | Eye color                                                | SLC45A2          |
| 5p13.2   | 33951693  | rs16891982 | $6.8 \times 10^{-48}$ | 0       | 1.000 | rs16891982 | $3.0 \times 10^{-11}$  | 17999355  | Skin pigmentation                                        | SLC45A2          |
| 5p13.2   | 33951693  | rs16891982 | $6.8 \times 10^{-48}$ | 3633    | 0.514 | rs35390    | $2.0 \times 10^{-7}$   | 21983787  | Melanoma                                                 | SLC45A2          |
| 5p13.2   | 33951693  | rs16891982 | $6.8 \times 10^{-48}$ | 3980    | 0.514 | rs35391    | $3.0 \times 10^{-10}$  | 19340012  | Tanning                                                  | MATP             |
| 5p13.2   | 33951693  | rs16891982 | $6.8 \times 10^{-48}$ | 7266    | 0.733 | rs28777    | $9.0 \times 10^{-14}$  | 18483556  | Black vs. red hair color                                 | MATP             |
| 5p13.2   | 33951693  | rs16891982 | $6.8 \times 10^{-48}$ | 7266    | 0.733 | rs28777    | $1.0 \times 10^{-17}$  | 18483556  | Black vs. blond hair color                               | MATP             |
| 15q13.1  | 28410491  | rs12916300 | $4.6 \times 10^{-47}$ | -53632  | 0.868 | rs1129038  | $4.0 \times 10^{-8}$   | 22561518  | Vitiligo                                                 | OCA2, HERC2      |
| 15q13.1  | 28410491  | rs12916300 | $4.6 \times 10^{-47}$ | -44873  | 0.880 | rs12913832 | $1.0 \times 10^{-22}$  | 23548203  | Tanning                                                  | HERC2            |
| 15q13.1  | 28410491  | rs12916300 | $4.6 \times 10^{-47}$ | -44873  | 0.880 | rs12913832 | $1.0 \times 10^{-167}$ | 23548203  | Hair color                                               | HERC2            |
| 15q13.1  | 28410491  | rs12916300 | $4.6 \times 10^{-47}$ | -44873  | 0.880 | rs12913832 | $1.0 \times 10^{-158}$ | 23548203  | Eye color                                                | HERC2            |
| 15q13.1  | 28410491  | rs12916300 | $4.6 \times 10^{-47}$ | -44873  | 0.880 | rs12913832 | $9.0 \times 10^{-88}$  | 20585627  | Hair color                                               | OCA2             |
| 15q13.1  | 28410491  | rs12916300 | $4.6 \times 10^{-47}$ | -44873  | 0.880 | rs12913832 | $3.0 \times 10^{-52}$  | 20585627  | Eye color                                                | OCA2             |
| 15q13.1  | 28410491  | rs12916300 | $4.6 \times 10^{-47}$ | -44873  | 0.880 | rs12913832 | $1.0 \times 10^{-300}$ | 20463881  | Eye color traits                                         | HERC2, OCA       |
| 15q13.1  | 28410491  | rs12916300 | $4.6 \times 10^{-47}$ | -44873  | 0.880 | rs12913832 | $1.0 \times 10^{-77}$  | 18483556  | Black vs. red hair color                                 | HERC2            |
| 15q13.1  | 28410491  | rs12916300 | $4.6 \times 10^{-47}$ | -44873  | 0.880 | rs12913832 | $4.0 \times 10^{-103}$ | 18483556  | Black vs. blond hair color                               | HERC2            |
| 15q13.1  | 28410491  | rs12916300 | $4.6 \times 10^{-47}$ | 102873  | 0.591 | rs916977   | $1.0 \times 10^{-43}$  | 18252221  | Iris color                                               | HERC2            |
| 15q13.1  | 28410491  | rs12916300 | $4.6 \times 10^{-47}$ | 119691  | 0.617 | rs1667394  | $2.0 \times 10^{-20}$  | 23118974  | Eye color                                                | HERC2, OCA2      |
| 15q13.1  | 28410491  | rs12916300 | $4.6 \times 10^{-47}$ | 119691  | 0.617 | rs1667394  | $2.0 \times 10^{-53}$  | 17952075  | Blue vs. green eyes                                      | OCA2             |
| 15q13.1  | 28410491  | rs12916300 | $4.6 \times 10^{-47}$ | 119691  | 0.617 | rs1667394  | $1.0 \times 10^{-241}$ | 17952075  | Blue vs. brown eyes                                      | OCA2             |
| 15q13.1  | 28410491  | rs12916300 | $4.6 \times 10^{-47}$ | 119691  | 0.617 | rs1667394  | $6.0 \times 10^{-35}$  | 17952075  | Blond vs. brown hair color                               | OCA2             |
| Xq13.1   | 69001854  | rs2804362  | $8.9 \times 10^{-36}$ | -196536 | 0.644 | rs4844096  | $5.0 \times 10^{-11}$  | 20195514  | Primary tooth development (number of teeth)              | EDA              |
| Xq13.1   | 69001854  | rs2804362  | $8.9 \times 10^{-36}$ | -108938 | 0.572 | rs5936487  | $6.0 \times 10^{-11}$  | 20195514  | Primary tooth development (time to first tooth eruption) | EDA              |
| 5q13.2   | 72559339  | rs6881396  | $6.7 \times 10^{-35}$ | -8205   | 0.920 | rs7702331  | $6.0 \times 10^{-10}$  | 23128233  | Crohn's disease                                          | Intergenic       |
| 5q13.2   | 72559339  | rs6881396  | $6.7 \times 10^{-35}$ | -8205   | 0.920 | rs7702331  | $6.0 \times 10^{-12}$  | 21102463  | Crohn's disease                                          | intergenic       |
| 14q32.12 | 92789205  | rs4144266  | $4.2 \times 10^{-21}$ | -25814  | 0.926 | rs4900109  | $8.0 \times 10^{-21}$  | 21835309  | Iris characteristics                                     | SLC324A4         |
| 14q32.12 | 92789205  | rs4144266  | $4.2 \times 10^{-21}$ | -15542  | 0.926 | rs12896399 | $2.0 \times 10^{-36}$  | 23548203  | Hair color                                               | SLC24A4          |
| 14q32.12 | 92789205  | rs4144266  | $4.2 \times 10^{-21}$ | -15542  | 0.926 | rs12896399 | $4.0 \times 10^{-11}$  | 23548203  | Eye color                                                | SLC24A4          |
| 14q32.12 | 92789205  | rs4144266  | $4.2 \times 10^{-21}$ | -15542  | 0.926 | rs12896399 | $5.0 \times 10^{-13}$  | 20585627  | Hair color                                               | SLC24A4          |
| 14q32.12 | 92789205  | rs4144266  | $4.2 \times 10^{-21}$ | -15542  | 0.926 | rs12896399 | $1.0 \times 10^{-16}$  | 20585627  | Eye color                                                | SLC24A4          |
| 14q32.12 | 92789205  | rs4144266  | $4.2 \times 10^{-21}$ | -15542  | 0.926 | rs12896399 | $8.0 \times 10^{-21}$  | 18483556  | Black vs. blond hair color                               | SLC24A4          |
| 14q32.12 | 92789205  | rs4144266  | $4.2 \times 10^{-21}$ | -15542  | 0.926 | rs12896399 | $4.0 \times 10^{-38}$  | 17952075  | Blue vs. green eyes                                      | SLC24A4          |
| 14q32.12 | 92789205  | rs4144266  | $4.2 \times 10^{-21}$ | -15542  | 0.926 | rs12896399 | $1.0 \times 10^{-48}$  | 17952075  | Blond vs. brown hair color                               | SLC24A4          |
| 8q21.11  | 77658645  | rs7837649  | $6.0 \times 10^{-21}$ | -47020  | 0.934 | rs4735738  | $5.0 \times 10^{-6}$   | 23667675  | Menarche (age at onset)                                  | ZFXH4            |
| 6q22.32  | 126825885 | rs72422730 | $6.4 \times 10^{-21}$ | -127166 | 0.937 | rs9388489  | $4.0 \times 10^{-13}$  | 19430480  | Type 1 diabetes                                          | C6orf173         |
| 6q22.32  | 126825885 | rs72422730 | $6.4 \times 10^{-21}$ | -58285  | 0.953 | rs1361108  | $9.0 \times 10^{-6}$   | 21998595  | Height                                                   | Intergenic       |
| 6q22.32  | 126825885 | rs72422730 | $6.4 \times 10^{-21}$ | -58285  | 0.953 | rs1361108  | $2.0 \times 10^{-8}$   | 21102462  | Menarche (age at onset)                                  | C6orf173, TRMT11 |
| 6q22.32  | 126825885 | rs72422730 | $6.4 \times 10^{-21}$ | 9770    | 0.958 | rs1490388  | $6.0 \times 10^{-7}$   | 18391951  | Height                                                   | C6orf173         |
| 6q22.32  | 126825885 | rs72422730 | $6.4 \times 10^{-21}$ | 25275   | 0.822 | rs1490384  | $1.0 \times 10^{-16}$  | 23563607  | Height                                                   | C6orf173         |
| 6q22.32  | 126825885 | rs72422730 | $6.4 \times 10^{-21}$ | 25275   | 0.822 | rs1490384  | $4.0 \times 10^{-21}$  | 20881960  | Height                                                   | C6orf173         |
| 6q22.32  | 126825885 | rs72422730 | $6.4 \times 10^{-21}$ | 140423  | 0.748 | rs4549631  | $5.0 \times 10^{-13}$  | 18391952  | Height                                                   | LOC387103        |
| 6p25.3   | 396321    | rs12203592 | $1.4 \times 10^{-10}$ | 0       | 1.000 | rs12203592 | $3.0 \times 10^{-23}$  | 23548203  | Tanning                                                  | IRF4             |
| 6p25.3   | 396321    | rs12203592 | $1.4 \times 10^{-10}$ | 0       | 1.000 | rs12203592 | $2.0 \times 10^{-6}$   | 23548203  | Sunburns                                                 | IRF4             |
| 6p25.3   | 396321    | rs12203592 | $1.4 \times 10^{-10}$ | 0       | 1.000 | rs12203592 | $7.0 \times 10^{-14}$  | 23548203  | Non-melanoma skin cancer                                 | IRF4             |
| 6p25.3   | 396321    | rs12203592 | $1.4 \times 10^{-10}$ | 0       | 1.000 | rs12203592 | $1.0 \times 10^{-28}$  | 23548203  | Hair color                                               | IRF4             |
| 6p25.3   | 396321    | rs12203592 | $1.4 \times 10^{-10}$ | 0       | 1.000 | rs12203592 | $6.0 \times 10^{-15}$  | 21685912  | Progressive supranuclear palsy                           | IRF4             |
| 6p25.3   | 396321    | rs12203592 | $1.4 \times 10^{-10}$ | 0       | 1.000 | rs12203592 | $4.0 \times 10^{-7}$   | 20585627  | Hair color                                               | IRF4             |
| 6p25.3   | 396321    | rs12203592 | $1.4 \times 10^{-10}$ | 0       | 1.000 | rs12203592 | $2.0 \times 10^{-91}$  | 20585627  | Freckling                                                | IRF4             |
| 6p25.3   | 396321    | rs12203592 | $1.4 \times 10^{-10}$ | 0       | 1.000 | rs12203592 | $2.0 \times 10^{-15}$  | 20585627  | Eye color                                                | IRF4             |

|          |          |             |                       |        |       |            |                        |          |                            |                                           |
|----------|----------|-------------|-----------------------|--------|-------|------------|------------------------|----------|----------------------------|-------------------------------------------|
| 6p25.3   | 396321   | rs12203592  | 1.4×10 <sup>-10</sup> | 0      | 1.000 | rs12203592 | 9.0×10 <sup>-28</sup>  | 18483556 | Black vs. red hair color   | IRF4                                      |
| 6p25.3   | 396321   | rs12203592  | 1.4×10 <sup>-10</sup> | 0      | 1.000 | rs12203592 | 7.0×10 <sup>-127</sup> | 18483556 | Black vs. blond hair color | IRF4                                      |
| 11q13.2  | 68224411 | rs138341189 | 1.9×10 <sup>-9</sup>  | -23116 | 0.612 | rs3736228  | 2.0×10 <sup>-26</sup>  | 22504420 | Bone mineral density       | LRP5                                      |
| 11q13.2  | 68224411 | rs138341189 | 1.9×10 <sup>-9</sup>  | -23116 | 0.612 | rs3736228  | 6.0×10 <sup>-12</sup>  | 18455228 | Bone mineral density       | LRP5                                      |
| 20p11.22 | 21868713 | rs6082544   | 3.5×10 <sup>-9</sup>  | -15613 | 0.852 | rs2180439  | 4.0×10 <sup>-17</sup>  | 22032556 | Male-pattern baldness      | Intergenic<br>PAX1, BQ013595,<br>BE789145 |
| 20p11.22 | 21868713 | rs6082544   | 3.5×10 <sup>-9</sup>  | -15613 | 0.852 | rs2180439  | 3.0×10 <sup>-15</sup>  | 18849994 | Male-pattern baldness      | PAX1, FOXA2                               |
| 20p11.22 | 21868713 | rs6082544   | 3.5×10 <sup>-9</sup>  | 168862 | 0.500 | rs6047844  | 2.0×10 <sup>-39</sup>  | 22693459 | Male-pattern baldness      | PAX1, FOXA2                               |

## Replication of GWAS Catalog Results

The following table shows, for each GWAS Catalog result for similar traits, our association test result for our best available proxy (distance < 100kb, r<sup>2</sup> > 0.8).

*no relevant GWAS catalog terms were available*

## Nearby Nonsynonymous SNPs

| region   | position  | our.name    | our.pval              | dist    | rsqr  | assay.name  | gene    | aa.chg |
|----------|-----------|-------------|-----------------------|---------|-------|-------------|---------|--------|
| 5p13.2   | 33951693  | rs16891982  | 6.8×10 <sup>-48</sup> | 0       | 1.000 | rs16891982  | SLC45A2 | F374L  |
| 4p16.3   | 3166196   | rs6828882   | 1.3×10 <sup>-22</sup> | 23351   | 0.920 | rs363125    | HTT     | T1720N |
| 2q12.3   | 109513601 | rs3827760   | 2.4×10 <sup>-15</sup> | 0       | 1.000 | rs3827760   | EDAR    | V370A  |
| 16q24.3  | 89967514  | rs78498439  | 6.9×10 <sup>-14</sup> | 159479  | 0.512 | rs150196149 | PRDM7   | L330P  |
| 11p11.2  | 44330610  | rs66716358  | 7.6×10 <sup>-13</sup> | 699     | 0.817 | rs12421995  | ALX4    | P102S  |
| 11p11.2  | 44330610  | rs66716358  | 7.6×10 <sup>-13</sup> | 899     | 0.989 | rs3824915   | ALX4    | R35T   |
| 12q21.31 | 85576492  | rs11609649  | 1.3×10 <sup>-12</sup> | -137993 | 0.504 | rs3765044   | LRRIQ1  | C83Y   |
| 12q21.31 | 85576492  | rs11609649  | 1.3×10 <sup>-12</sup> | -109769 | 0.504 | rs17012533  | LRRIQ1  | A912T  |
| 11q13.2  | 68224411  | rs138341189 | 1.9×10 <sup>-9</sup>  | -23116  | 0.612 | rs3736228   | LRP5    | A1330V |

## Nearby Expression QTLs

| region   | position  | our.name    | our.pval              | dist    | rsqr  | assay.name | eqtl.dist | eqtl.gene | eqtl.pval             | eqtl.rsqr | tissue         | pubmed.id |
|----------|-----------|-------------|-----------------------|---------|-------|------------|-----------|-----------|-----------------------|-----------|----------------|-----------|
| 5q33.2   | 153938270 | rs199955185 | 1.8×10 <sup>-20</sup> | -18461  | 0.652 | rs11749542 | 278243    | C5orf4    | 0.00021               | 0.172     | Fibroblast     | 19644074  |
| 20q13.31 | 55791615  | rs230203    | 1.7×10 <sup>-19</sup> | 14725   | 0.623 | rs186659   | -183952   | HS.132453 | 0.00020               | 0.048     | Monocyte       | 22446964  |
| 5q11.2   | 53116966  | rs1553477   | 2.3×10 <sup>-17</sup> | 37997   | 0.714 | rs271251   | -200566   | NDUFS4    | 2.4×10 <sup>-5</sup>  | 0.062     | Monocyte       | 22446964  |
| 6p21.1   | 44681840  | rs227833    | 5.6×10 <sup>-16</sup> | 118175  | 0.658 | rs542444   | 545675    | SUPT3H    | 2.2×10 <sup>-12</sup> | 0.125     | Lymphoblastoid | 24037378  |
| 6p21.1   | 44681840  | rs227833    | 5.6×10 <sup>-16</sup> | 136028  | 0.821 | rs4714813  | 211208    | SUPT3H    | 6.9×10 <sup>-10</sup> | 0.165     | Lymphoblastoid | 17873874  |
| 16q24.3  | 89967514  | rs78498439  | 6.9×10 <sup>-14</sup> | 18630   | 0.823 | rs1805008  | 238999    | CDK10     | 2.6×10 <sup>-24</sup> | 0.244     | Lymphoblastoid | 24037378  |
| 16q24.3  | 89967514  | rs78498439  | 6.9×10 <sup>-14</sup> | 18630   | 0.823 | rs1805008  | -223556   | CDK10     | 4.9×10 <sup>-6</sup>  | 0.072     | Monocyte       | 22446964  |
| 16q24.3  | 89967514  | rs78498439  | 6.9×10 <sup>-14</sup> | 18630   | 0.823 | rs1805008  | -223556   | CDK10     | 1.8×10 <sup>-7</sup>  | 0.093     | B-Cell         | 22446964  |
| 16q24.3  | 89967514  | rs78498439  | 6.9×10 <sup>-14</sup> | 18630   | 0.823 | rs1805008  | -212494   | C16ORF7   | 1.4×10 <sup>-8</sup>  | 0.109     | B-Cell         | 22446964  |
| 11p11.2  | 44330610  | rs66716358  | 7.6×10 <sup>-13</sup> | -15220  | 0.595 | rs1828656  | 325581    | CD82      | 0.00038               | 0.044     | Monocyte       | 22446964  |
| 2q31.1   | 177111819 | rs970797    | 9.0×10 <sup>-12</sup> | -291754 | 1.000 | rs970797   | -154287   | HOXD13    | 2.8×10 <sup>-5</sup>  |           | Liver          | 18462017  |
| 2q31.1   | 177111819 | rs970797    | 9.0×10 <sup>-12</sup> | -291754 | 1.000 | rs970797   | 983217    | NFE2L2    | 0.0023                |           | Liver          | 18462017  |
| 4q21.21  | 81194090  | rs3796606   | 5.5×10 <sup>-10</sup> | 6555    | 0.961 | rs6827834  | 773916    | BMP3      | 0.0014                | 0.036     | B-Cell         | 22446964  |
| 11q13.2  | 68224411  | rs138341189 | 1.9×10 <sup>-9</sup>  | -23116  | 0.612 | rs3736228  | 320795    | CPT1A     | 3.9×10 <sup>-17</sup> | 0.047     | Monocyte       | 20502693  |
| 11q13.2  | 68224411  | rs138341189 | 1.9×10 <sup>-9</sup>  | -23116  | 0.612 | rs3736228  | 320955    | CPT1A     | 4.9×10 <sup>-5</sup>  | 0.057     | Monocyte       | 22446964  |
| 1p33     | 46990457  | rs1267303   | 3.6×10 <sup>-9</sup>  | -230152 | 0.669 | rs1267308  | -831072   | TMEM69    | 0.00018               |           | Lymphoblastoid | 20220756  |
| 1p33     | 46990457  | rs1267303   | 3.6×10 <sup>-9</sup>  | -2739   | 0.669 | rs1267308  | -1867807  | TMEM53    | 0.00020               | 0.048     | Monocyte       | 22446964  |

## Nearby Clinical Variants

| source  | region   | our.name   | our.pval              | dist   | rsqr  | assay.name | gene    | phenotype                                                           | accession                                                            |
|---------|----------|------------|-----------------------|--------|-------|------------|---------|---------------------------------------------------------------------|----------------------------------------------------------------------|
| clinvar | 5p13.2   | rs16891982 | 6.8×10 <sup>-48</sup> | 0      | 1.000 | rs16891982 | SLC45A2 | Skin/hair/eye pigmentation, variation in, 5                         | NCBI curation                                                        |
| clinvar | 5p13.2   | rs16891982 | 6.8×10 <sup>-48</sup> | 0      | 1.000 | rs16891982 | SLC45A2 | Oculocutaneous albinism type 4                                      | NCBI curation                                                        |
| clinvar | 15q13.1  | rs12916300 | 4.6×10 <sup>-47</sup> | -44873 | 0.880 | rs12913832 | HERC2   | Skin/hair/eye pigmentation, variation in, 1                         | NCBI curation<br>Genetics Home<br>Referenceprader-willi-<br>syndrome |
| clinvar | 15q13.1  | rs12916300 | 4.6×10 <sup>-47</sup> | -44873 | 0.880 | rs12913832 | HERC2   | Prader-Willi syndrome                                               | SNOMED CT89392001                                                    |
| clinvar | 15q13.1  | rs12916300 | 4.6×10 <sup>-47</sup> | -44873 | 0.880 | rs12913832 | HERC2   | Prader-Willi syndrome<br>Mental retardation, autosomal recessive 38 | NCBI curation                                                        |
| clinvar | 14q32.12 | rs4144266  | 4.2×10 <sup>-21</sup> | -15542 | 0.926 | rs12896399 | SLC24A4 | Skin/hair/eye pigmentation, variation in, 6                         | NCBI curation                                                        |
| clinvar | 14q32.12 | rs4144266  | 4.2×10 <sup>-21</sup> | -15542 | 0.926 | rs12896399 | SLC24A4 | AMELOGENESIS IMPERFECTA,<br>HYPOMATURATION TYPE, IIA5               | OMIM615887                                                           |
| clinvar | 2q12.3   | rs3827760  | 2.4×10 <sup>-15</sup> | 0      | 1.000 | rs3827760  | EDAR    | Autosomal recessive hypohidrotic<br>ectodermal dysplasia syndrome   | SNOMED CT27025001                                                    |
| clinvar | 2q12.3   | rs3827760  | 2.4×10 <sup>-15</sup> | 0      | 1.000 | rs3827760  | EDAR    | Autosomal dominant hypohidrotic<br>ectodermal dysplasia             | NCBI curation                                                        |
| clinvar | 2q12.3   | rs3827760  | 2.4×10 <sup>-15</sup> | 0      | 1.000 | rs3827760  | EDAR    | Hair morphology 1                                                   | NCBI curation                                                        |
| clinvar | 16q24.3  | rs78498439 | 6.9×10 <sup>-14</sup> | 18630  | 0.823 | rs1805008  | MC1R    | Cutaneous malignant melanoma 5                                      | NCBI curation                                                        |
| clinvar | 16q24.3  | rs78498439 | 6.9×10 <sup>-14</sup> | 18630  | 0.823 | rs1805008  | MC1R    | Skin/hair/eye pigmentation, variation in, 2                         | NCBI curation                                                        |

|         |         |            |                       |       |       |           |      |                                                                         |                             |
|---------|---------|------------|-----------------------|-------|-------|-----------|------|-------------------------------------------------------------------------|-----------------------------|
| clinvar | 16q24.3 | rs78498439 | $6.9 \times 10^{-14}$ | 18630 | 0.823 | rs1805008 | MC1R | Increased analgesia from kappa-opioid receptor agonist, female-specific | NCBI curation               |
| clinvar | 16q24.3 | rs78498439 | $6.9 \times 10^{-14}$ | 18630 | 0.823 | rs1805008 | MC1R | Tyrosinase-positive oculocutaneous albinism                             | SNOMED CT26336006           |
| clinvar | 16q24.3 | rs78498439 | $6.9 \times 10^{-14}$ | 18630 | 0.823 | rs1805008 | MC1R | Tyrosinase-positive oculocutaneous albinism                             | Office of Rare Diseases4038 |

## Regional Association Plots

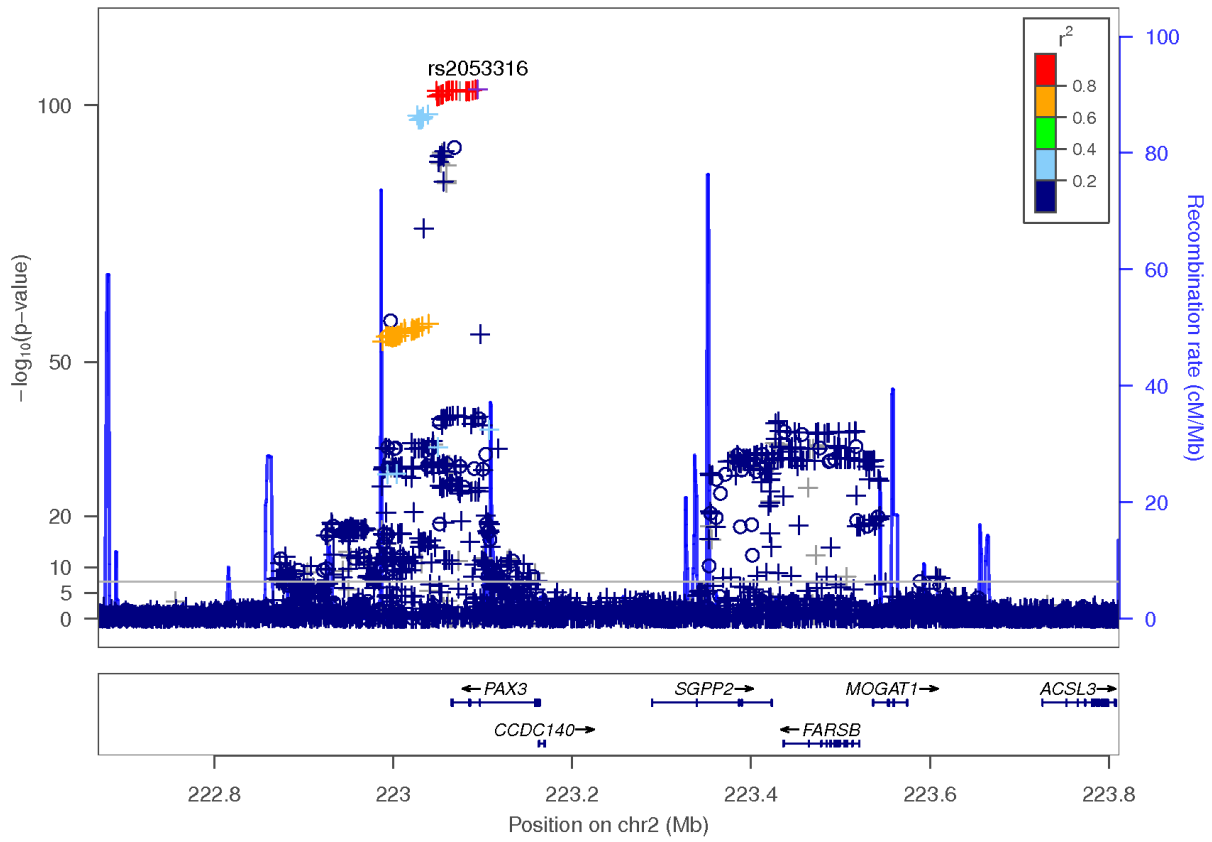

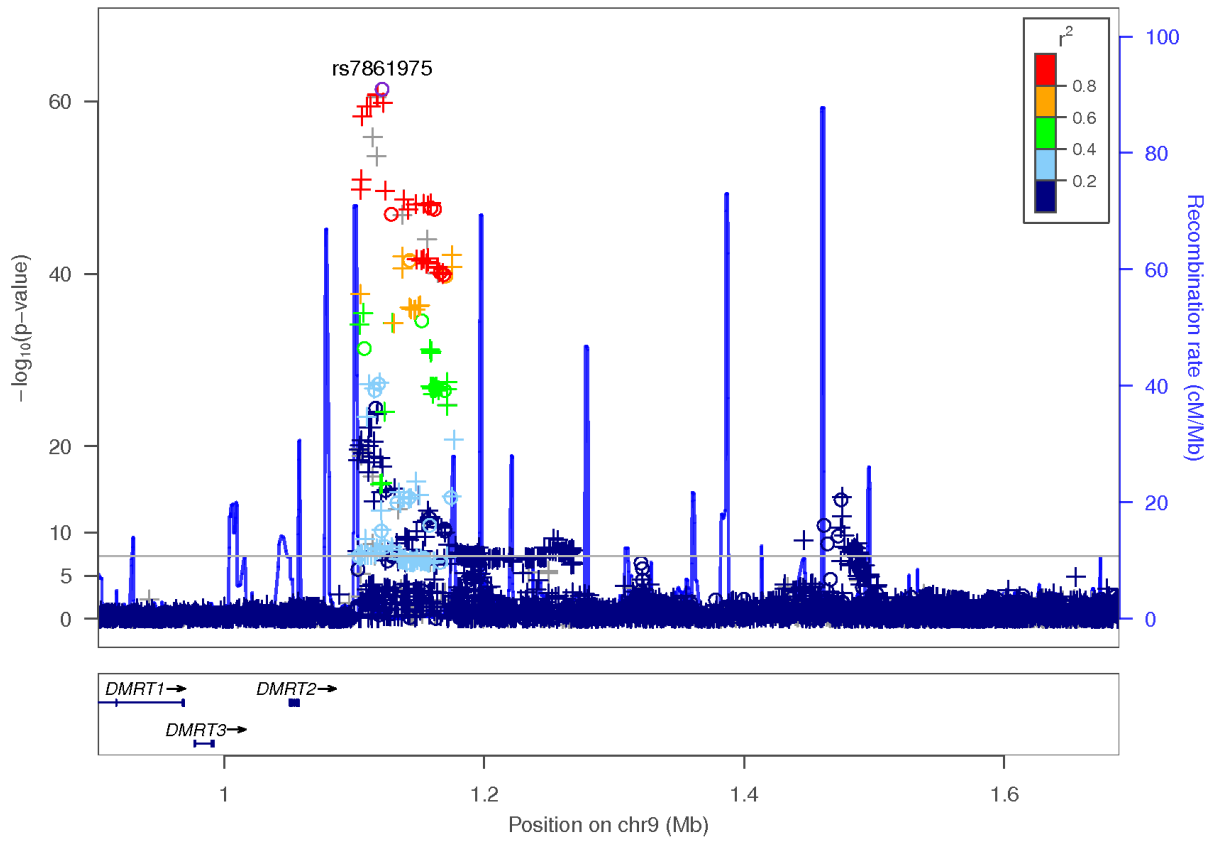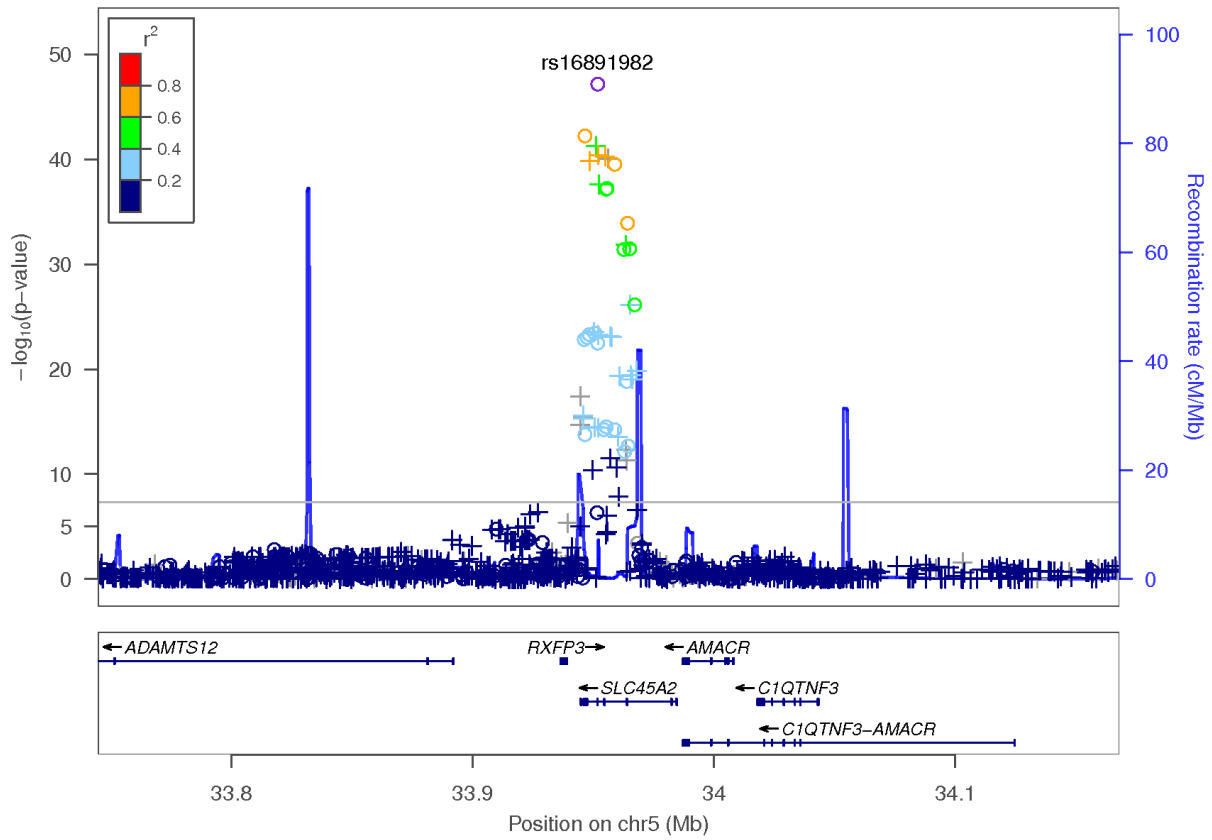



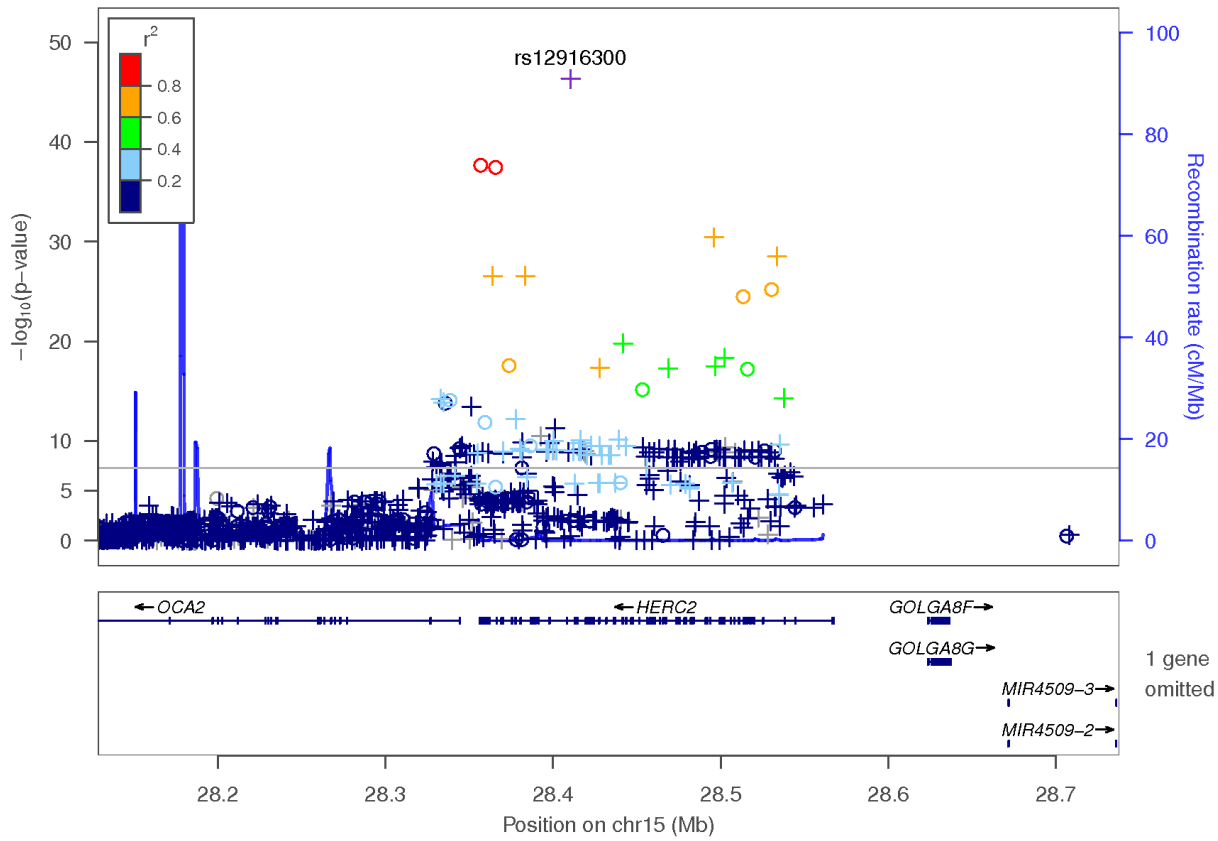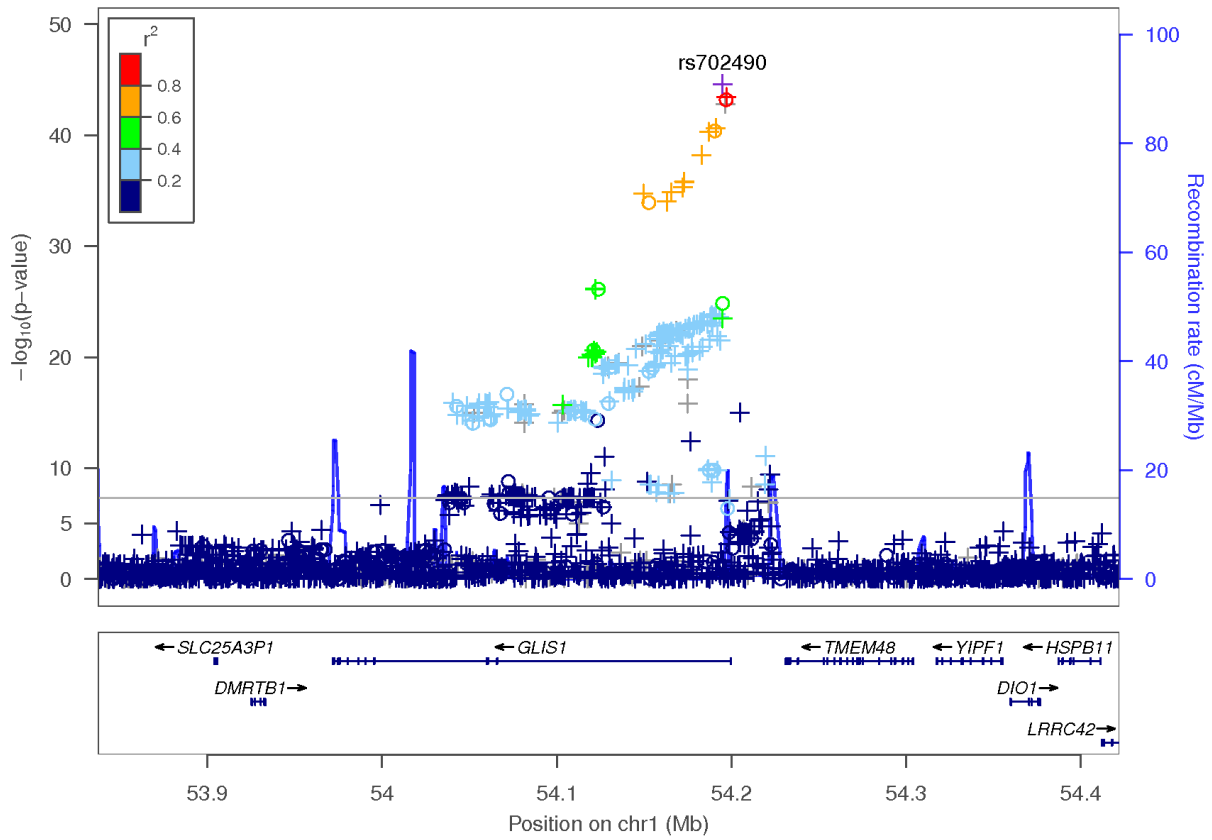

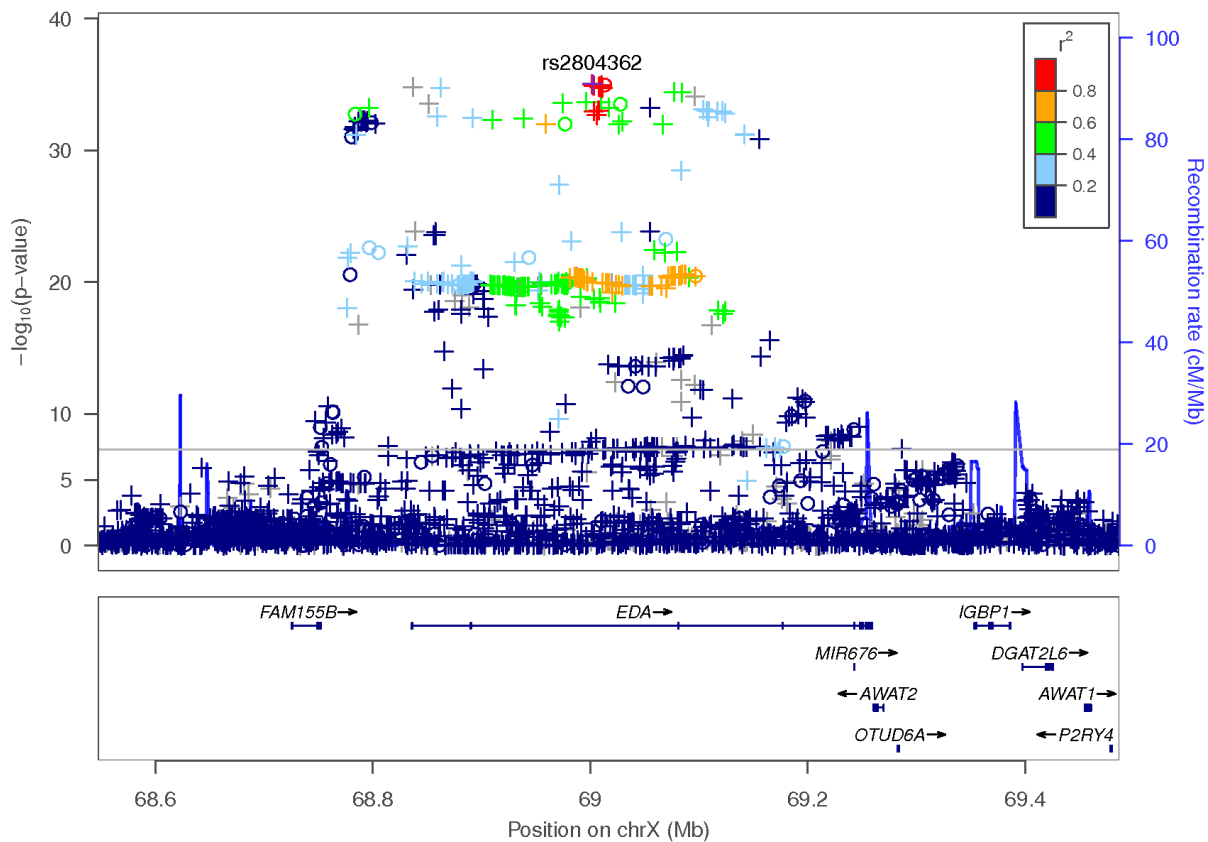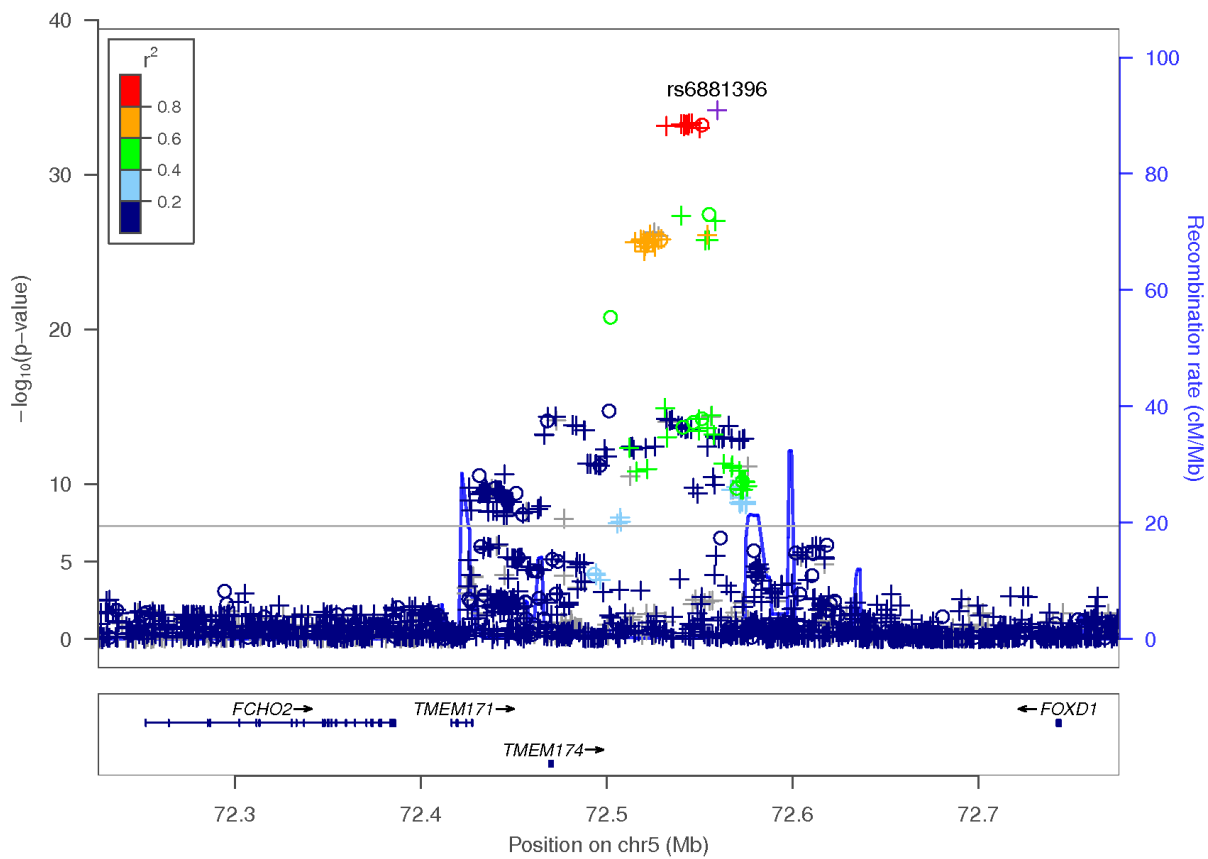

locuszoom plot for 17:43849572:AT\_A failed

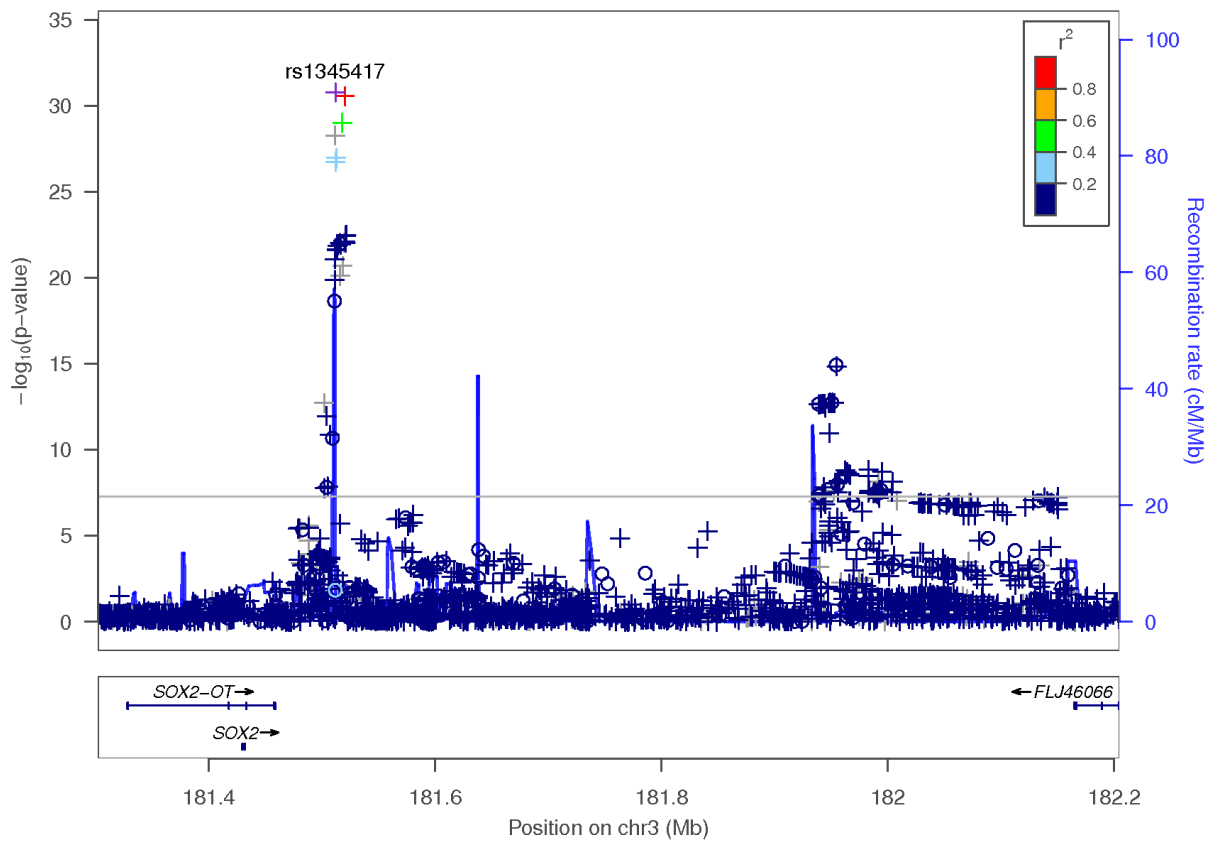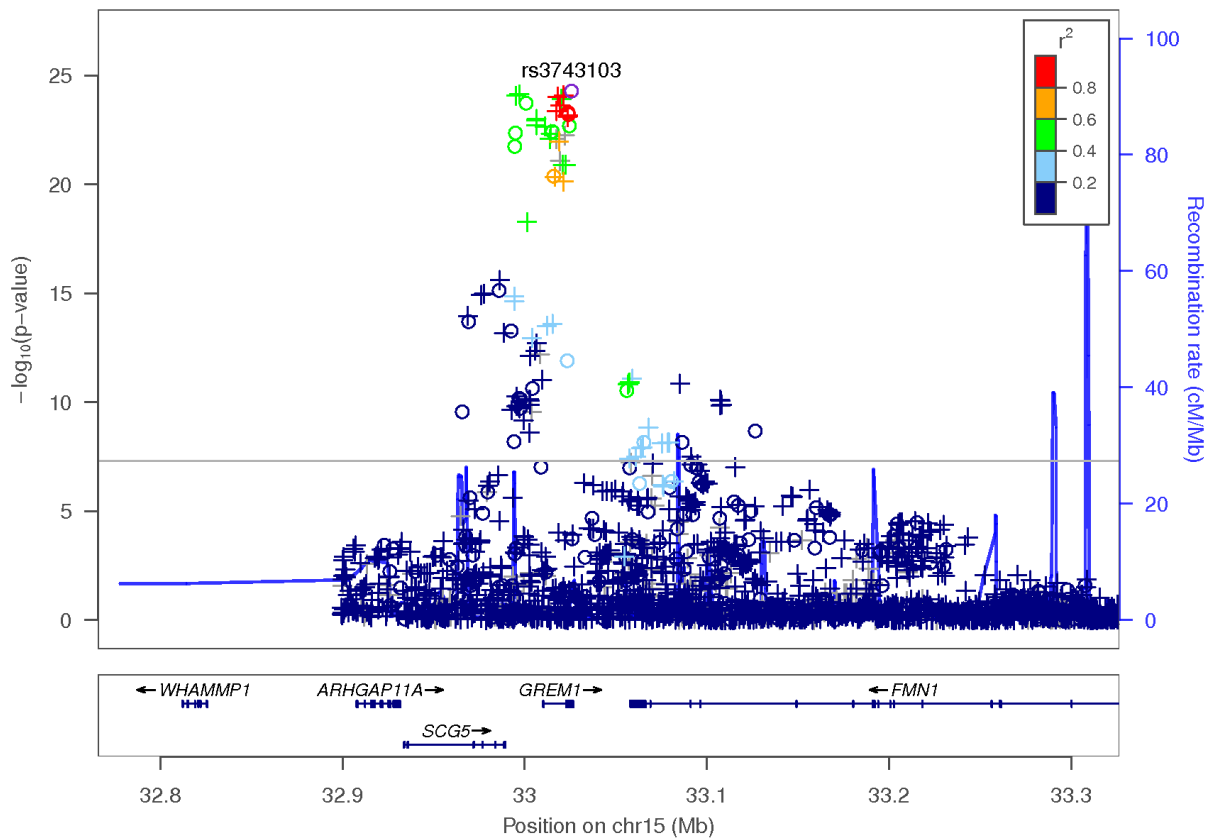

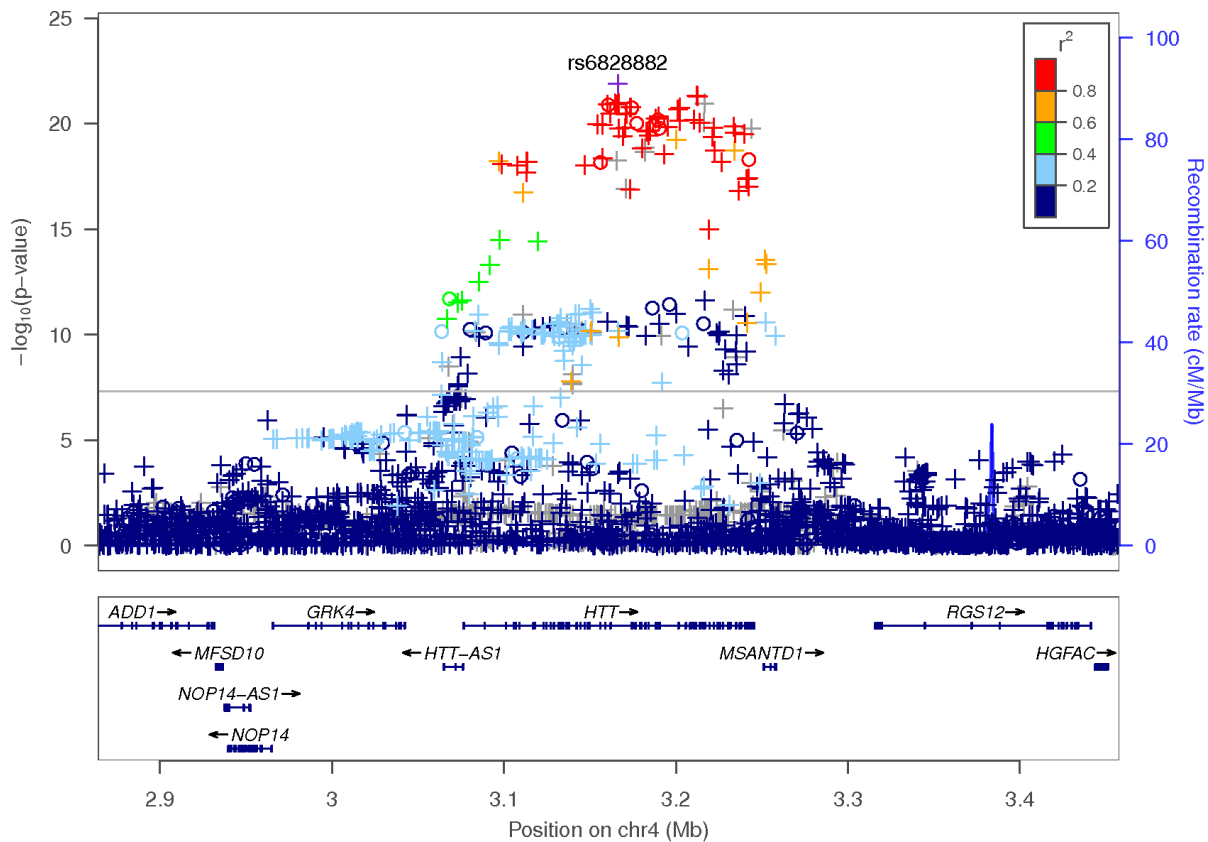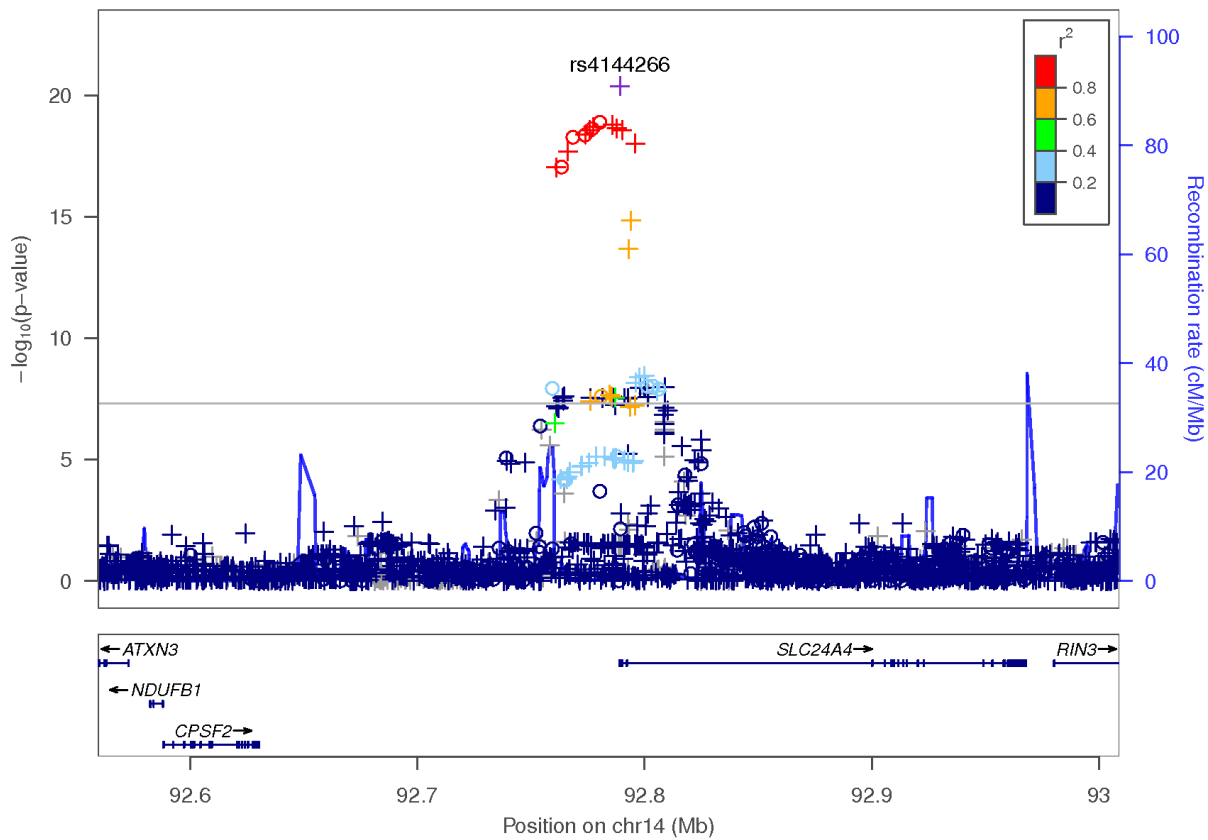

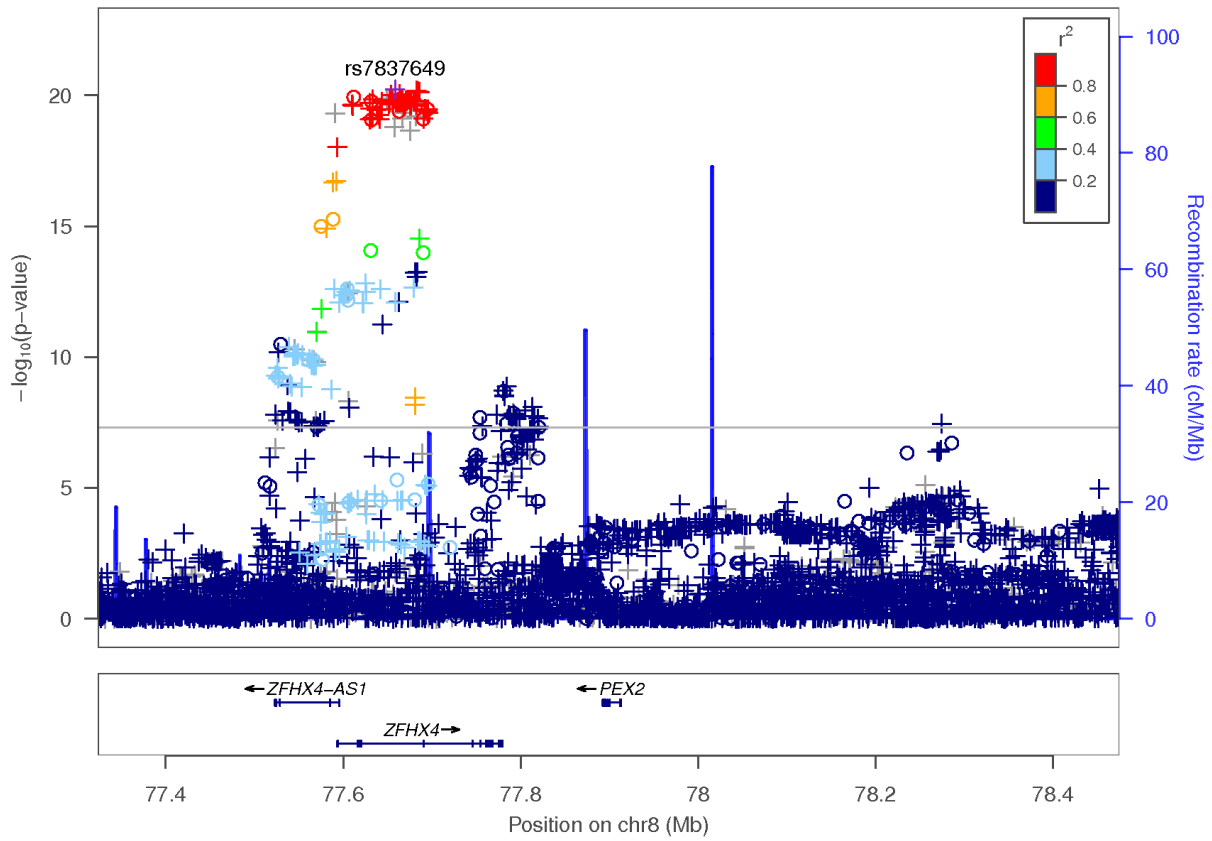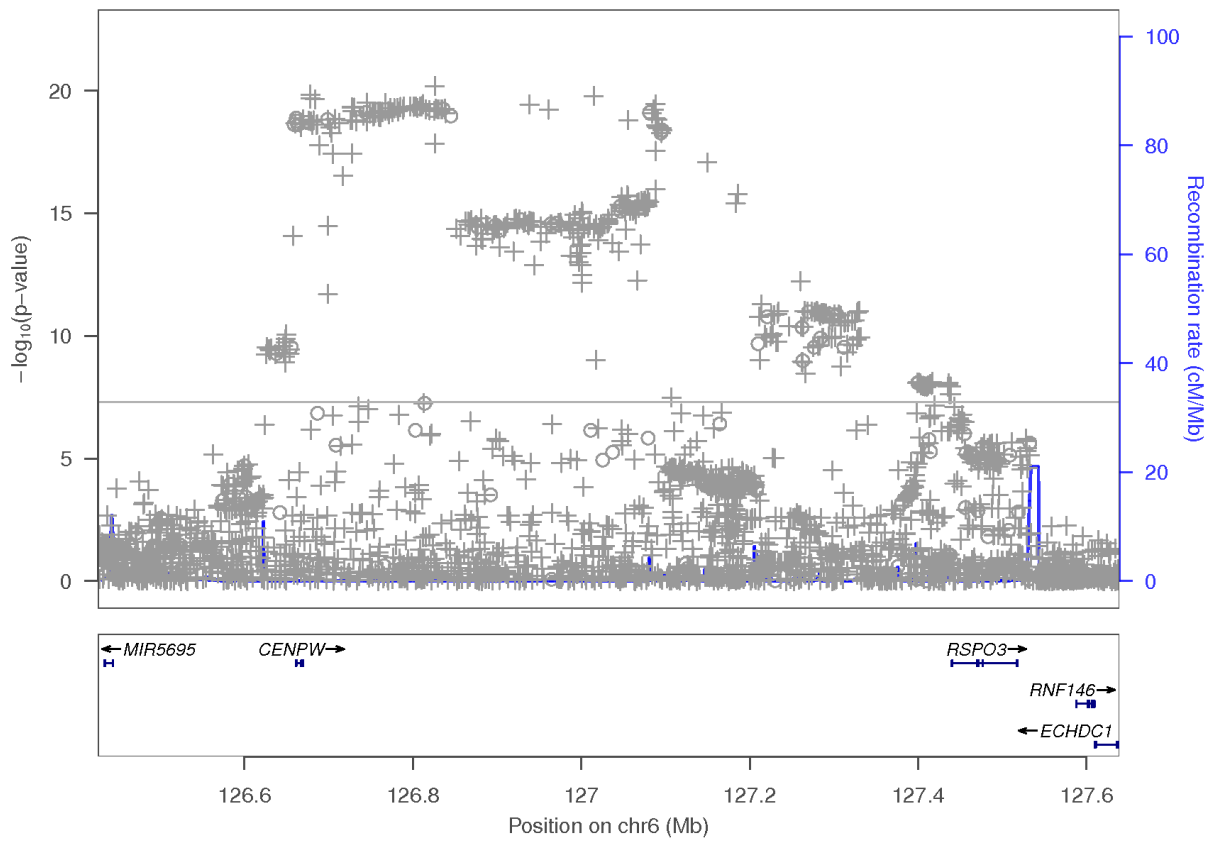

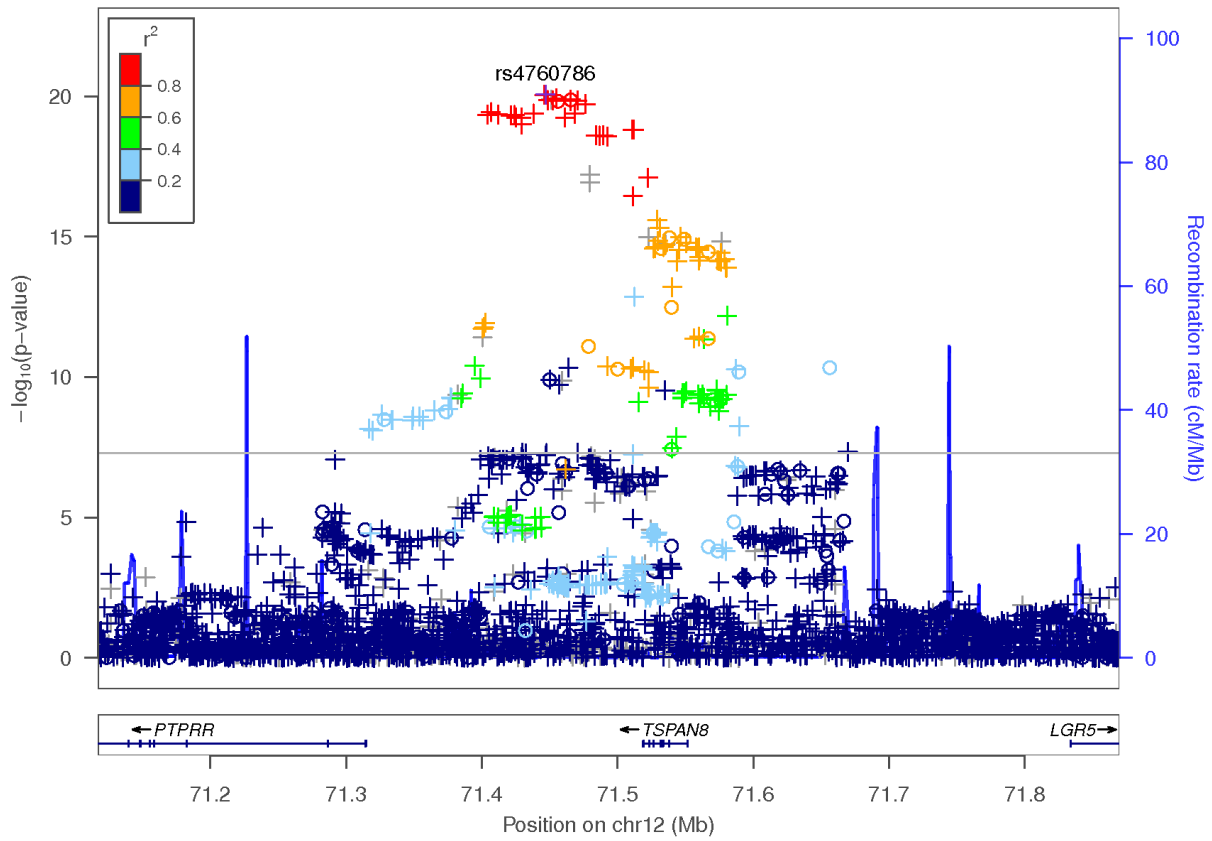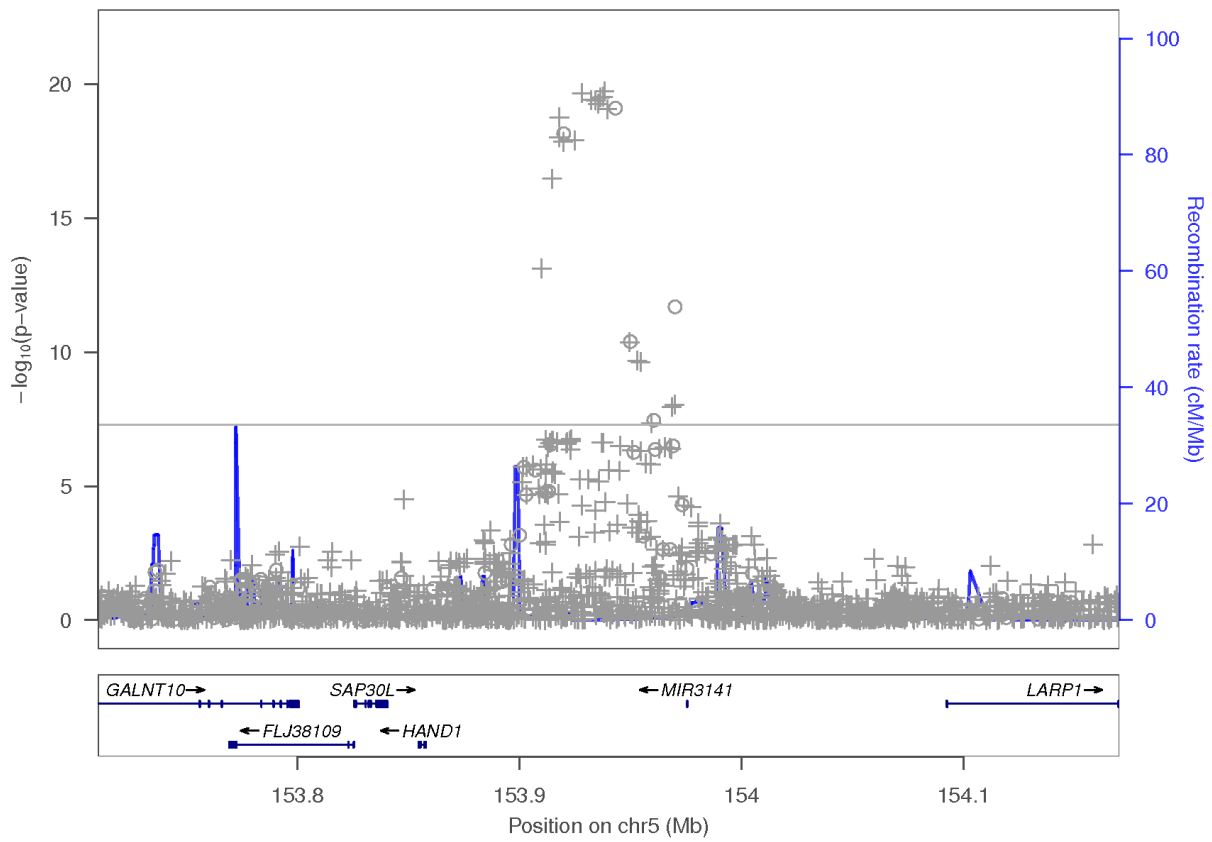

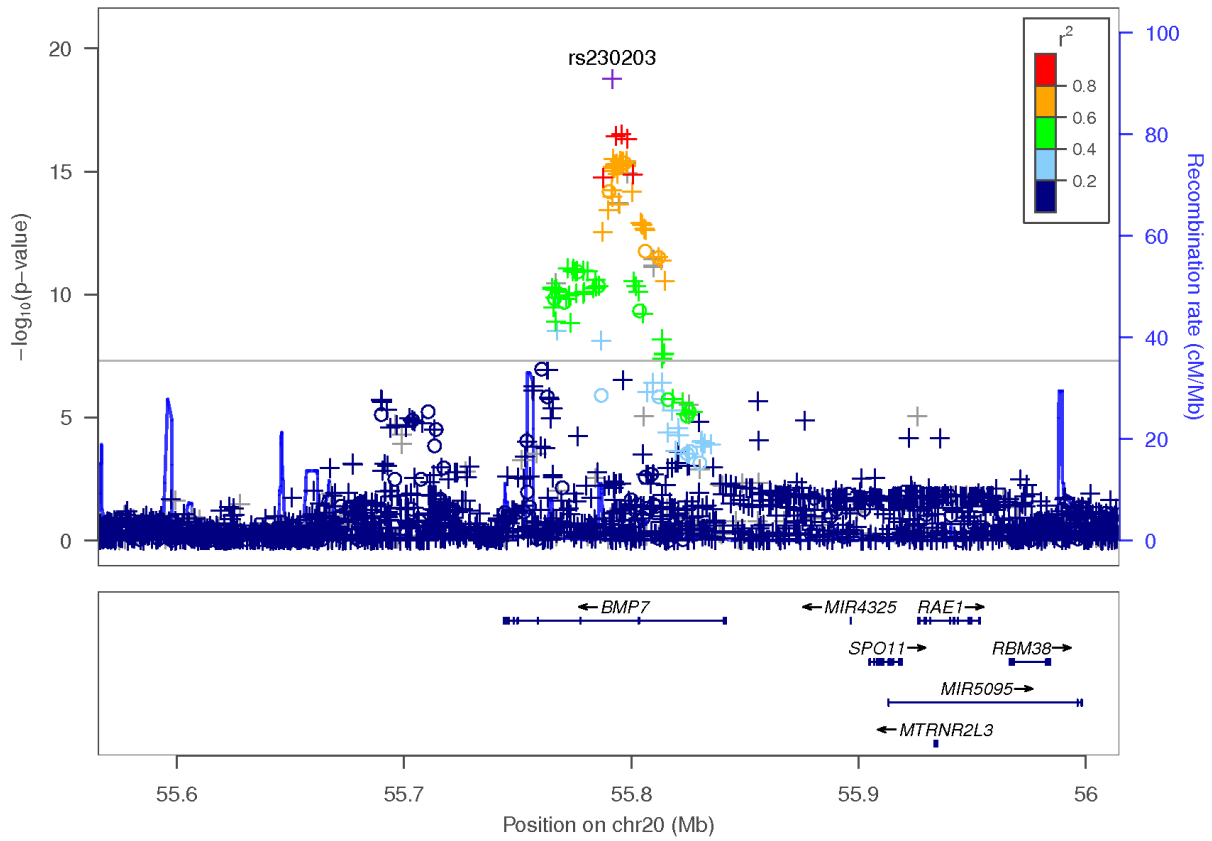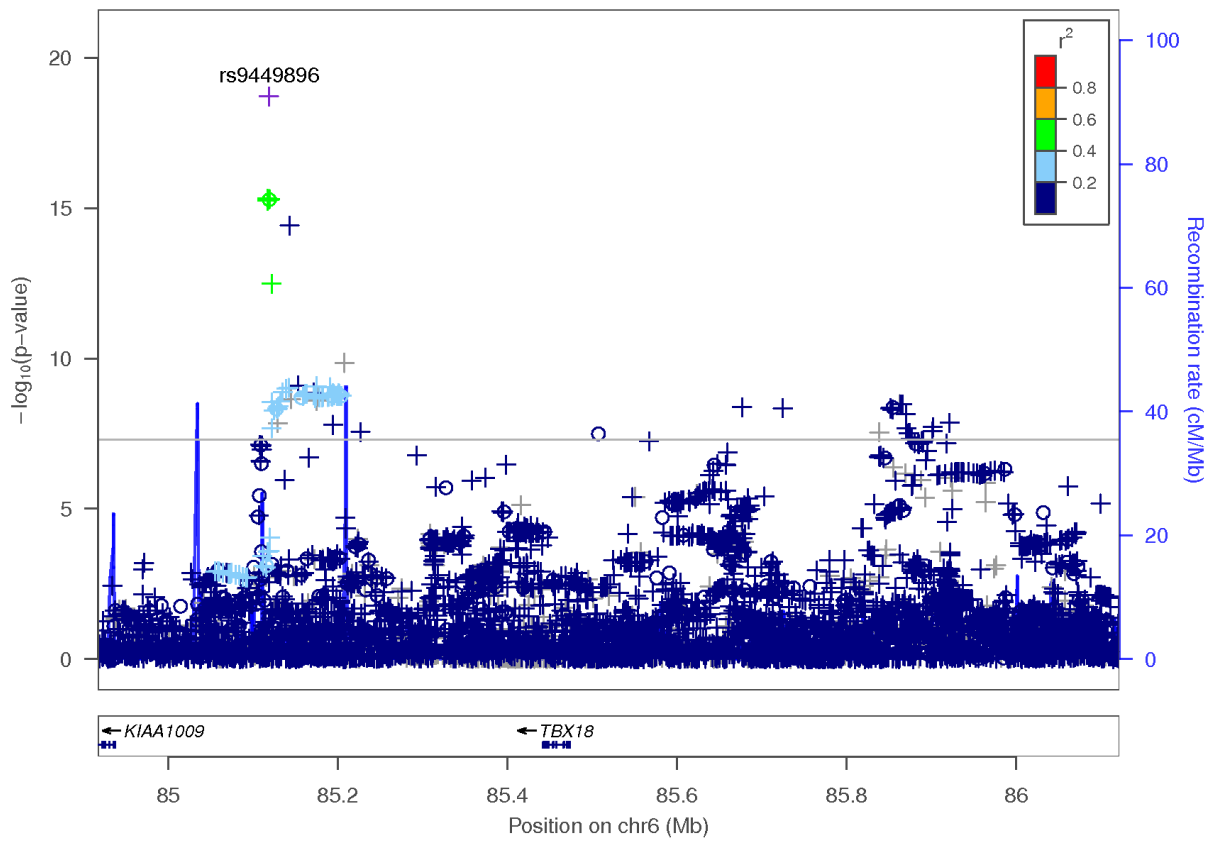

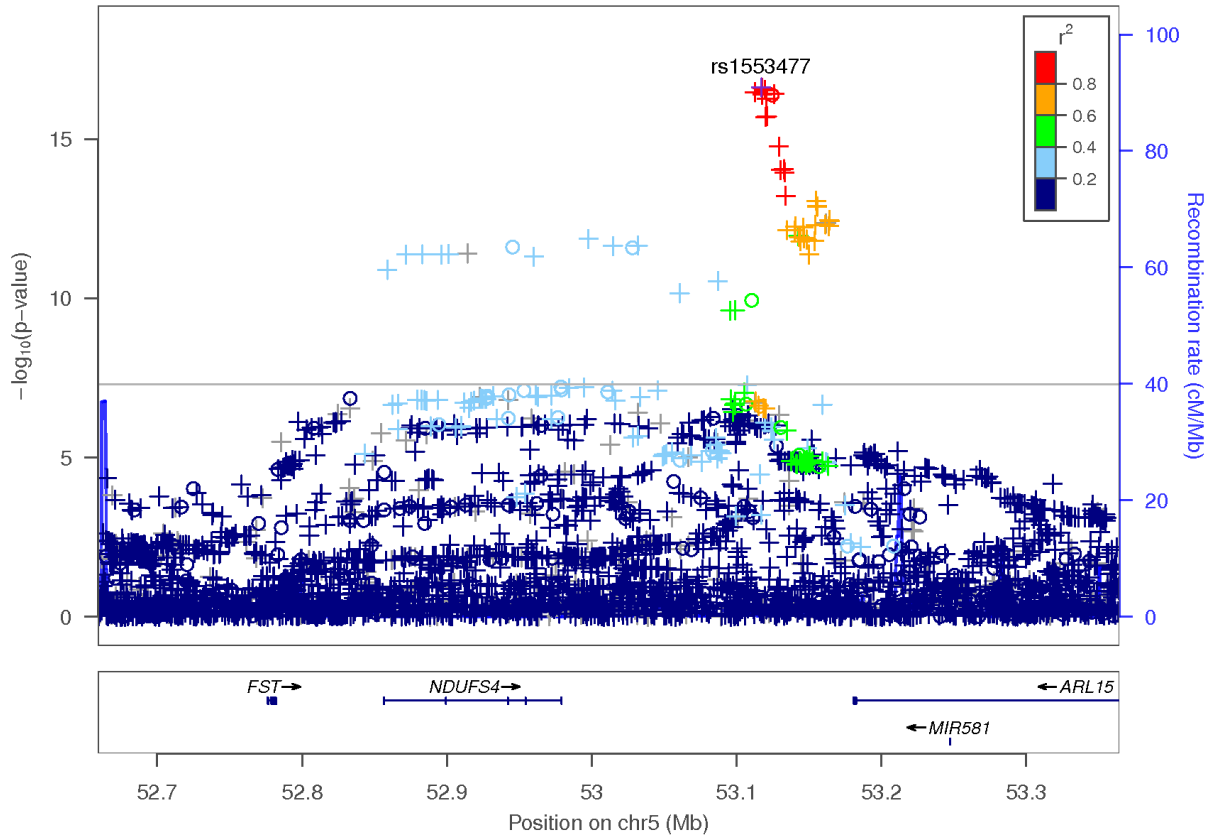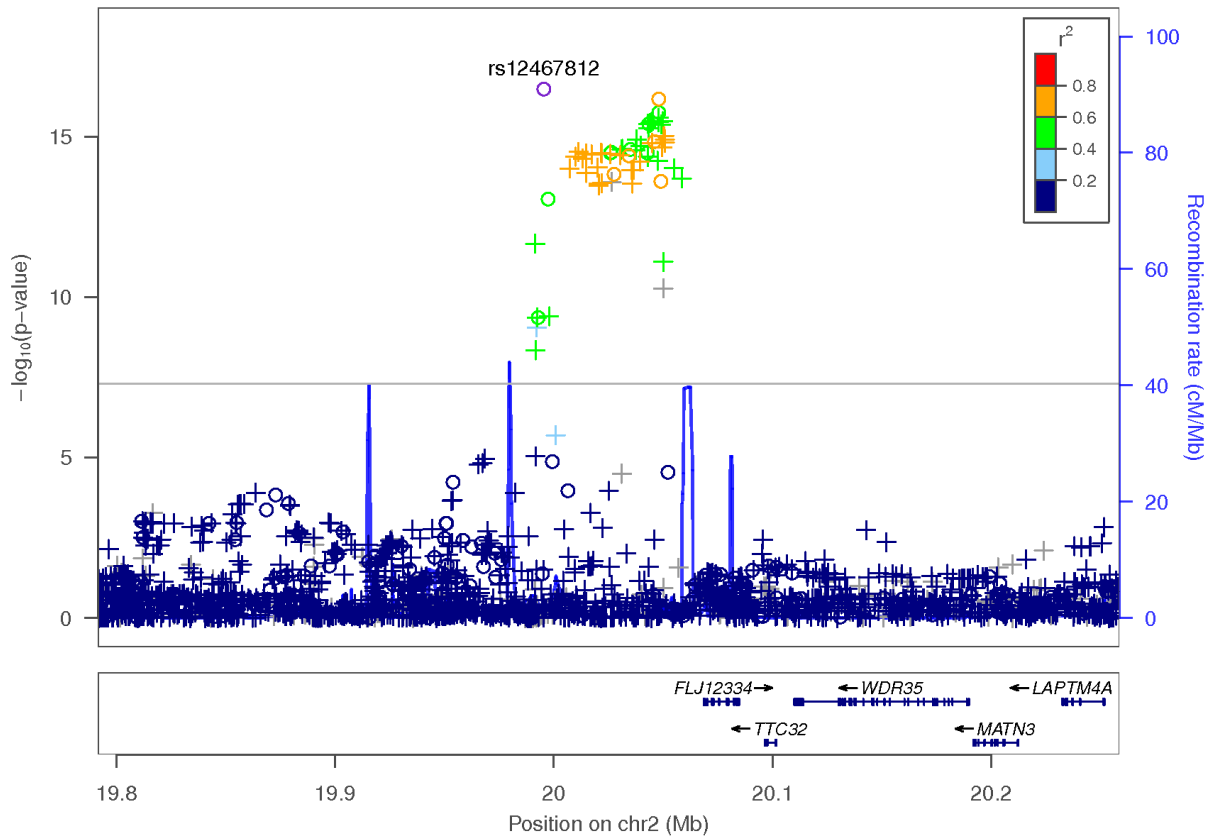



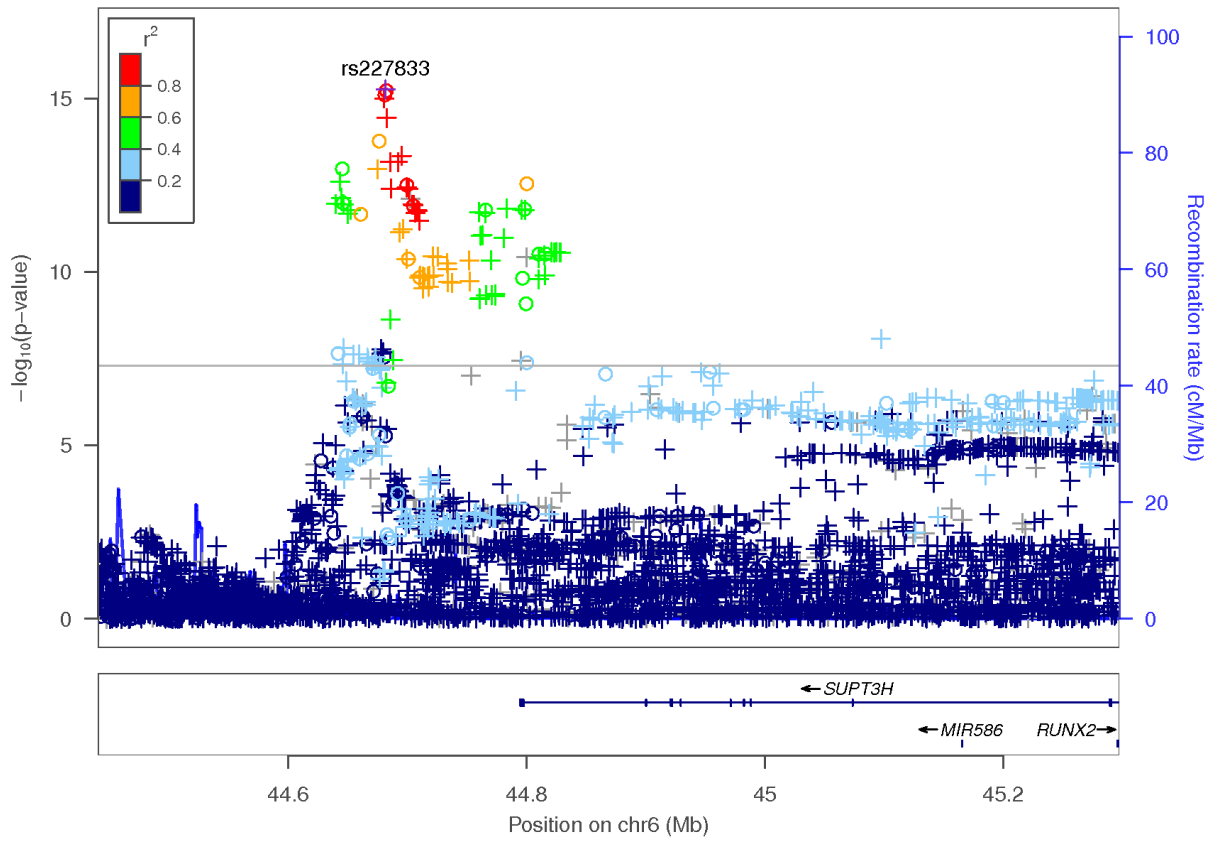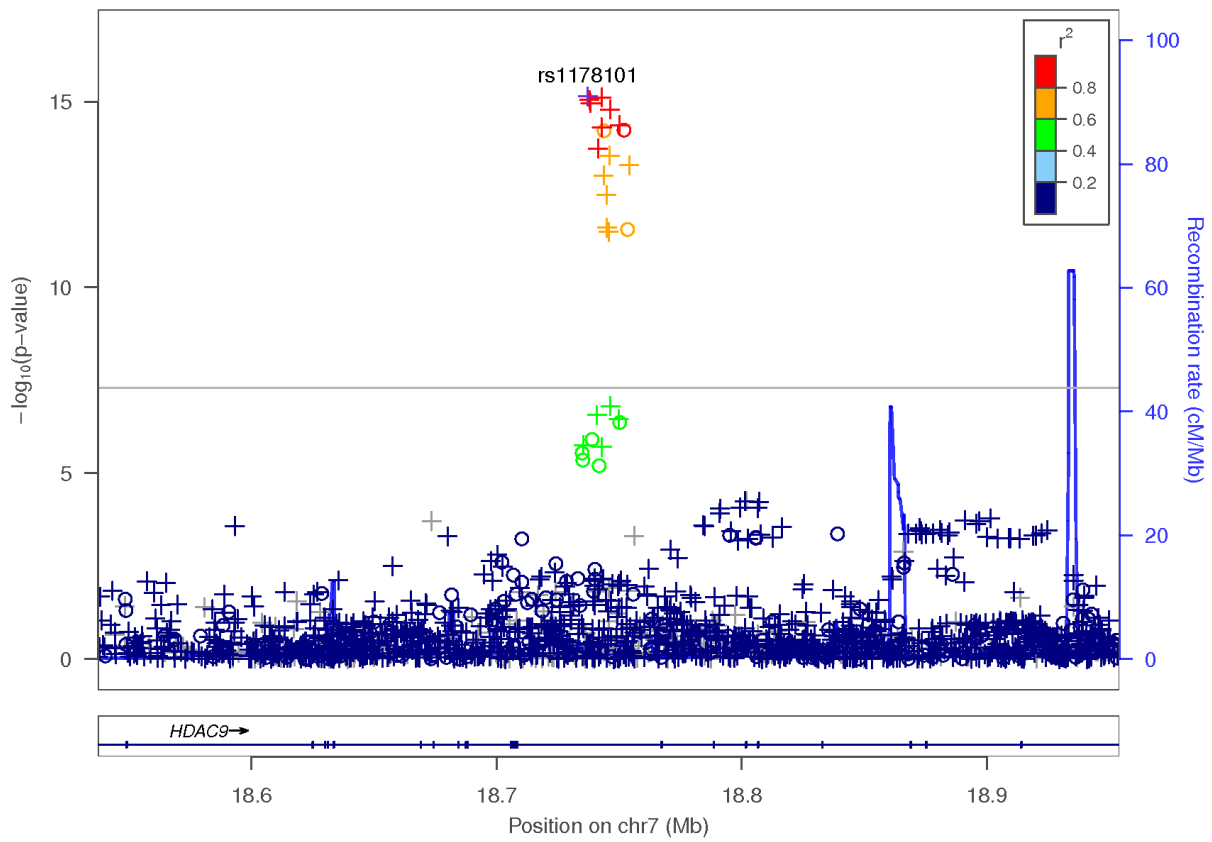

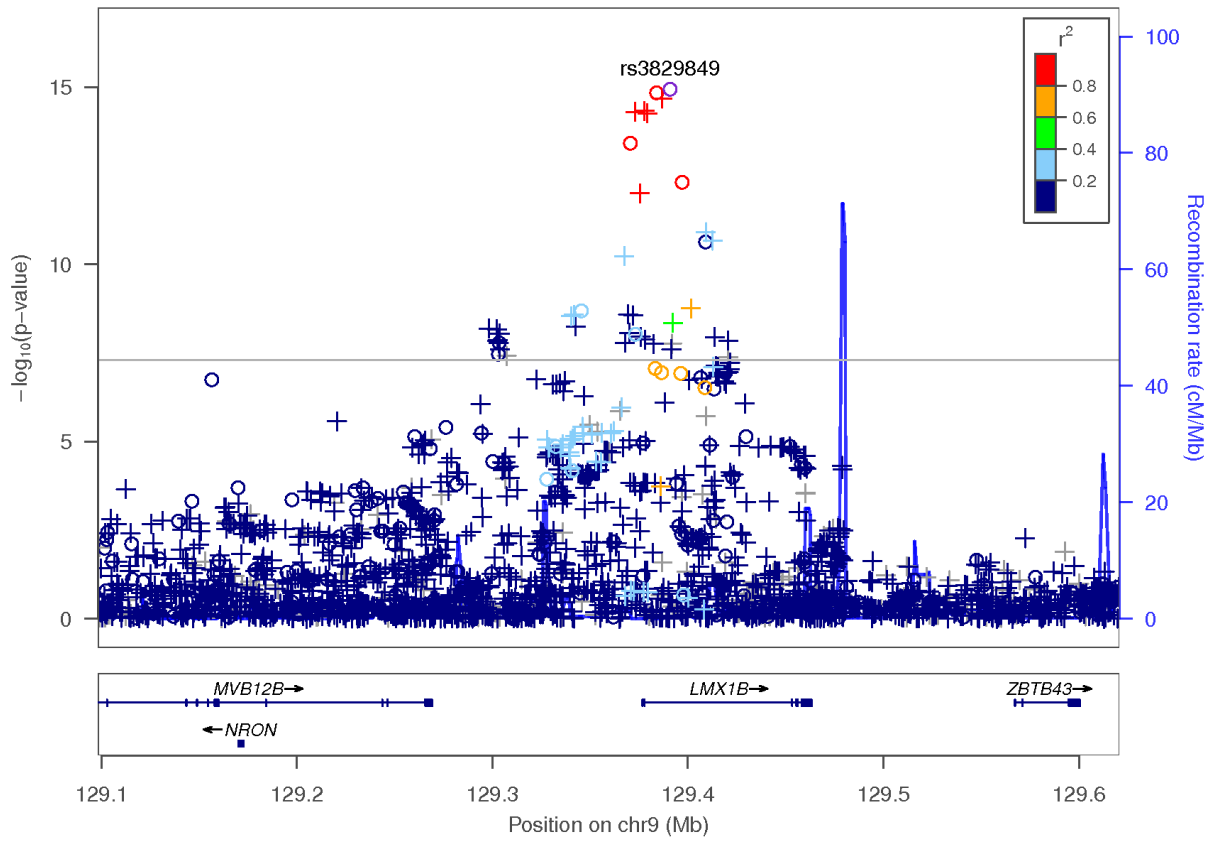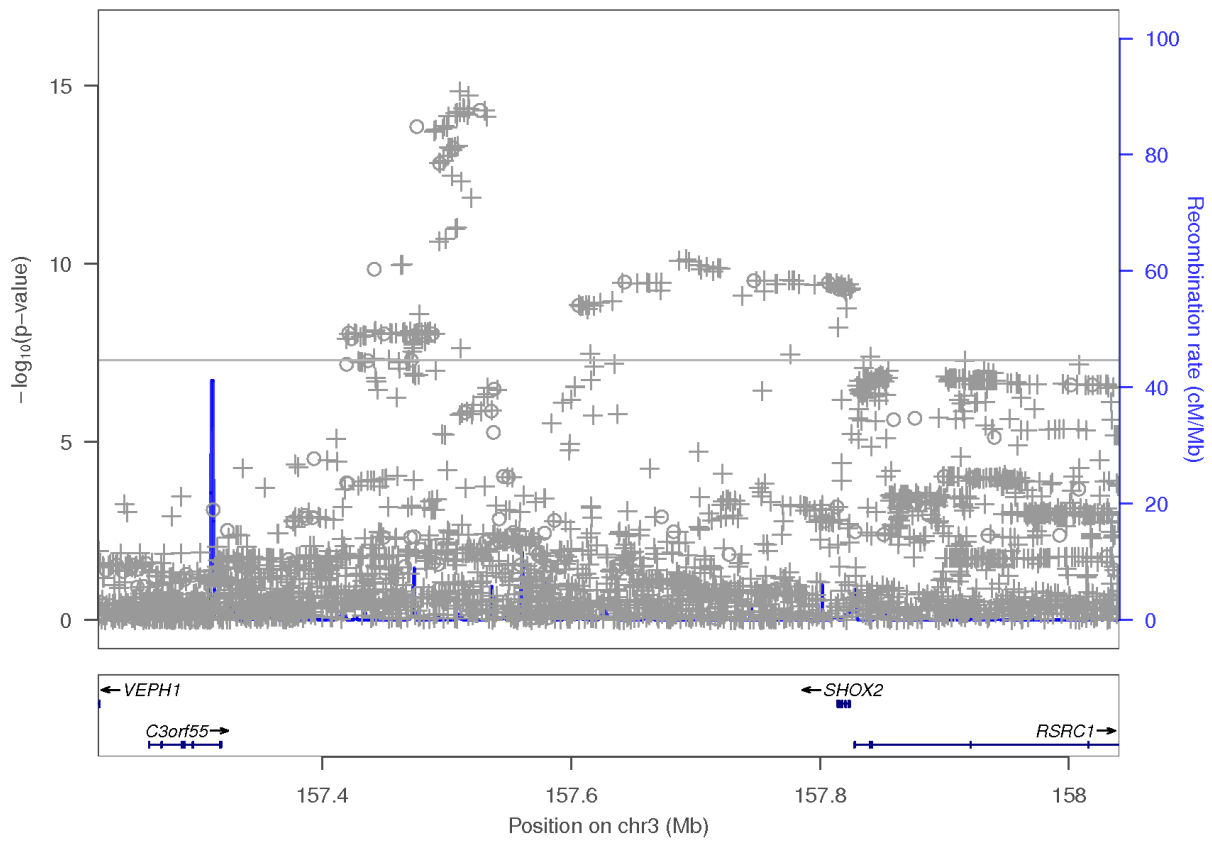

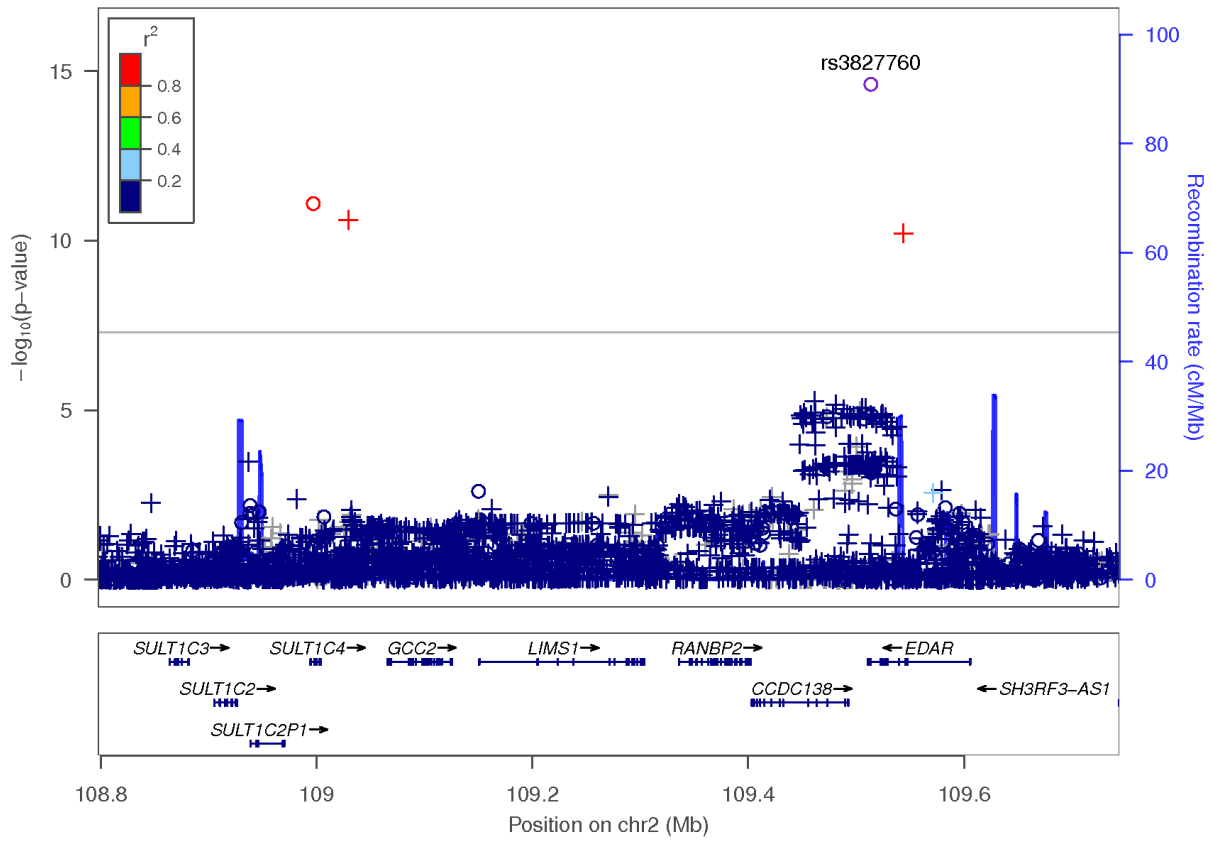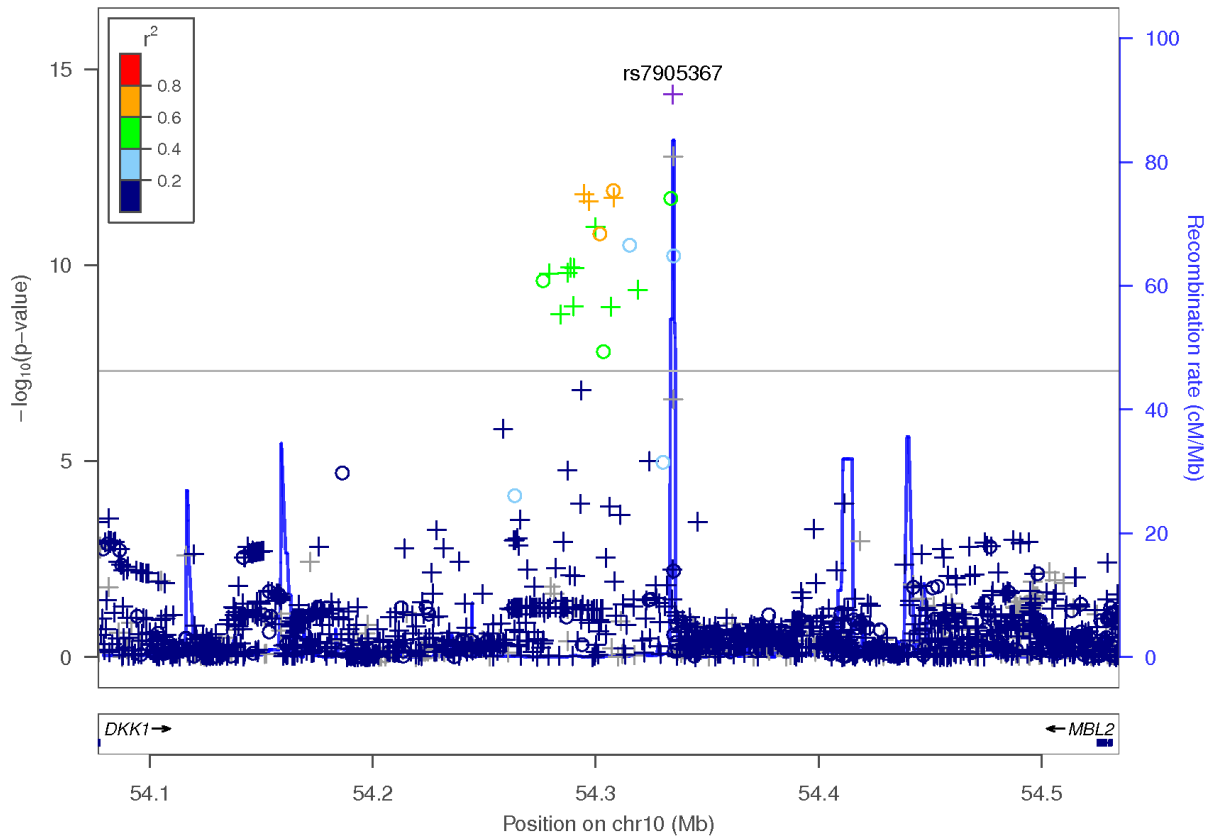

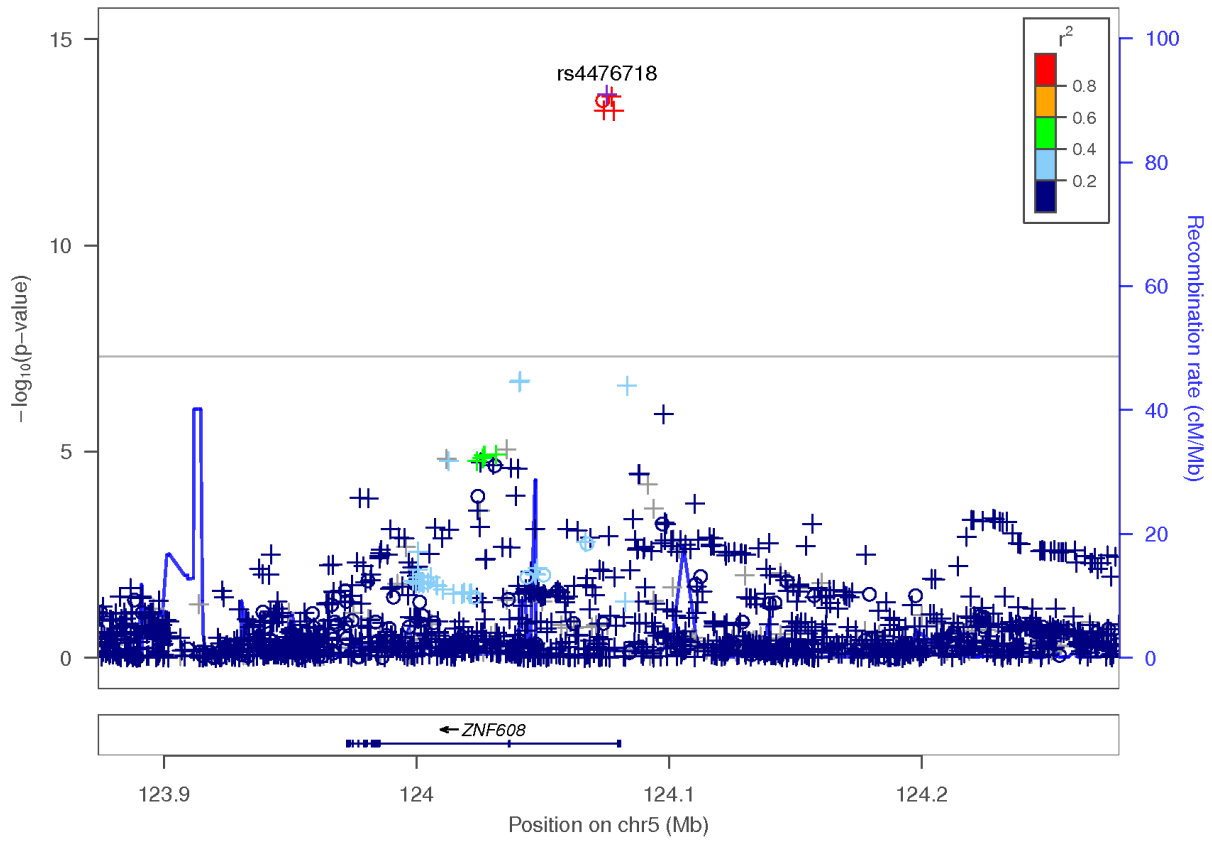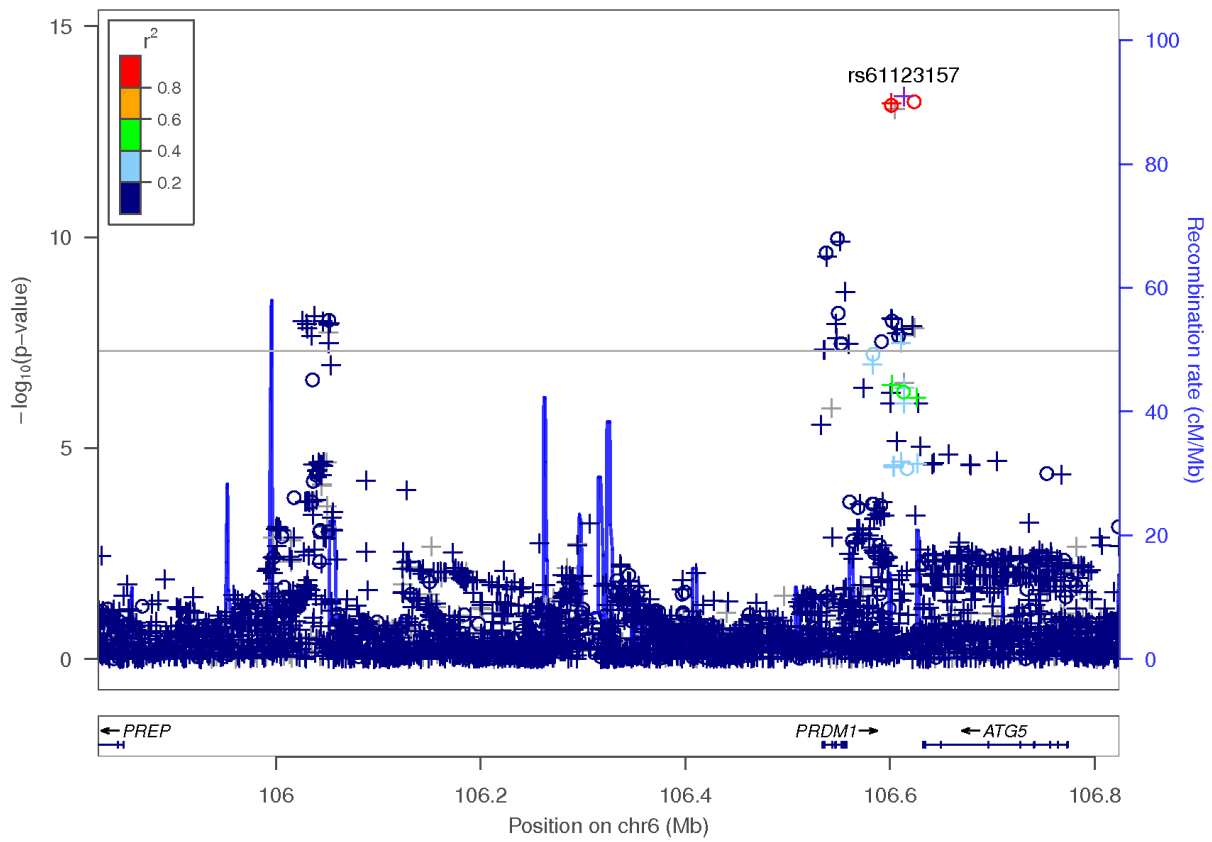

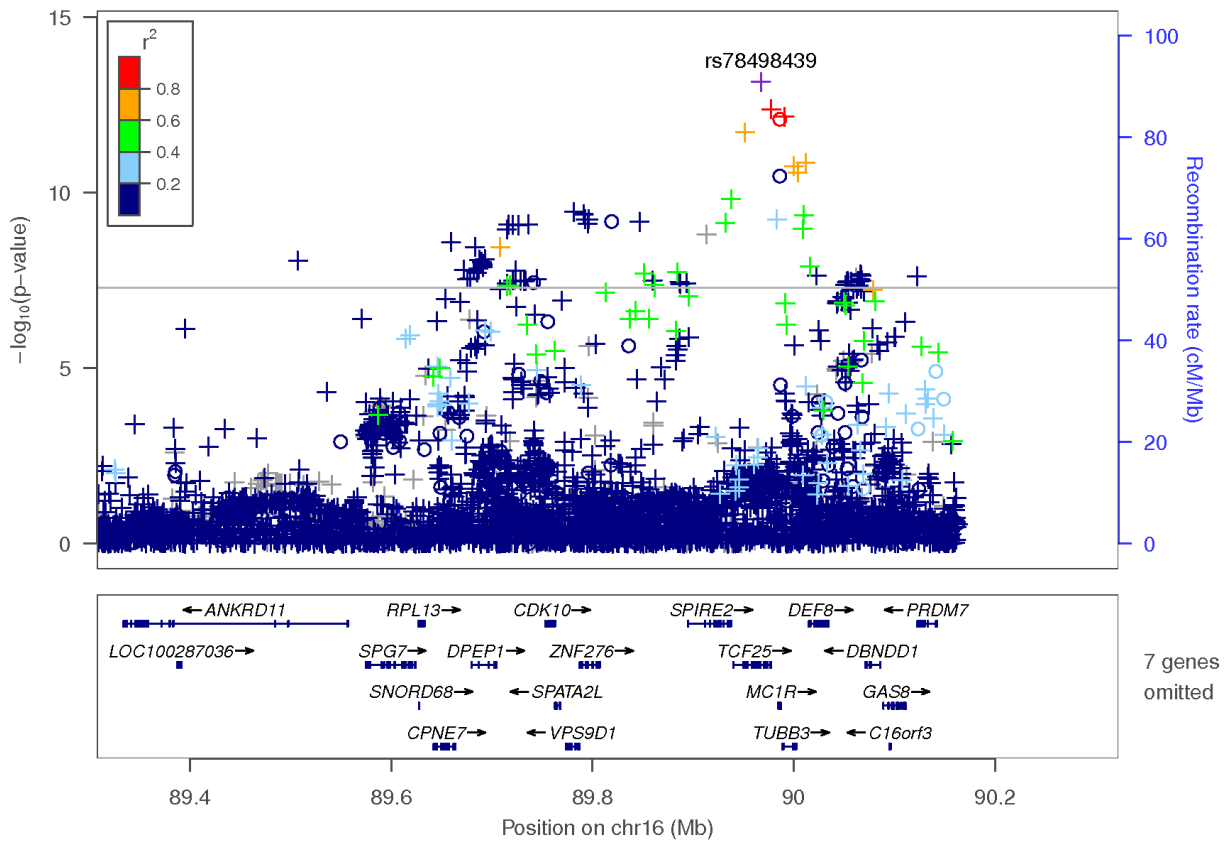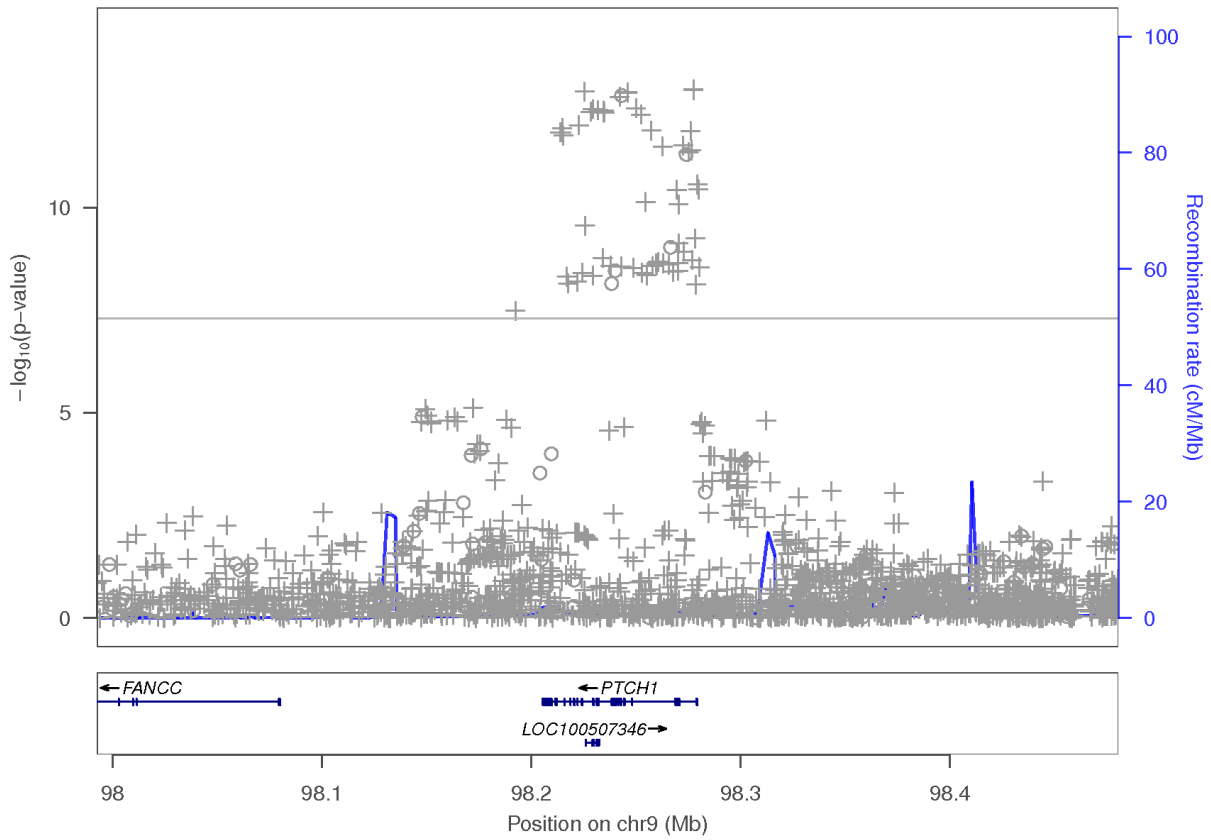

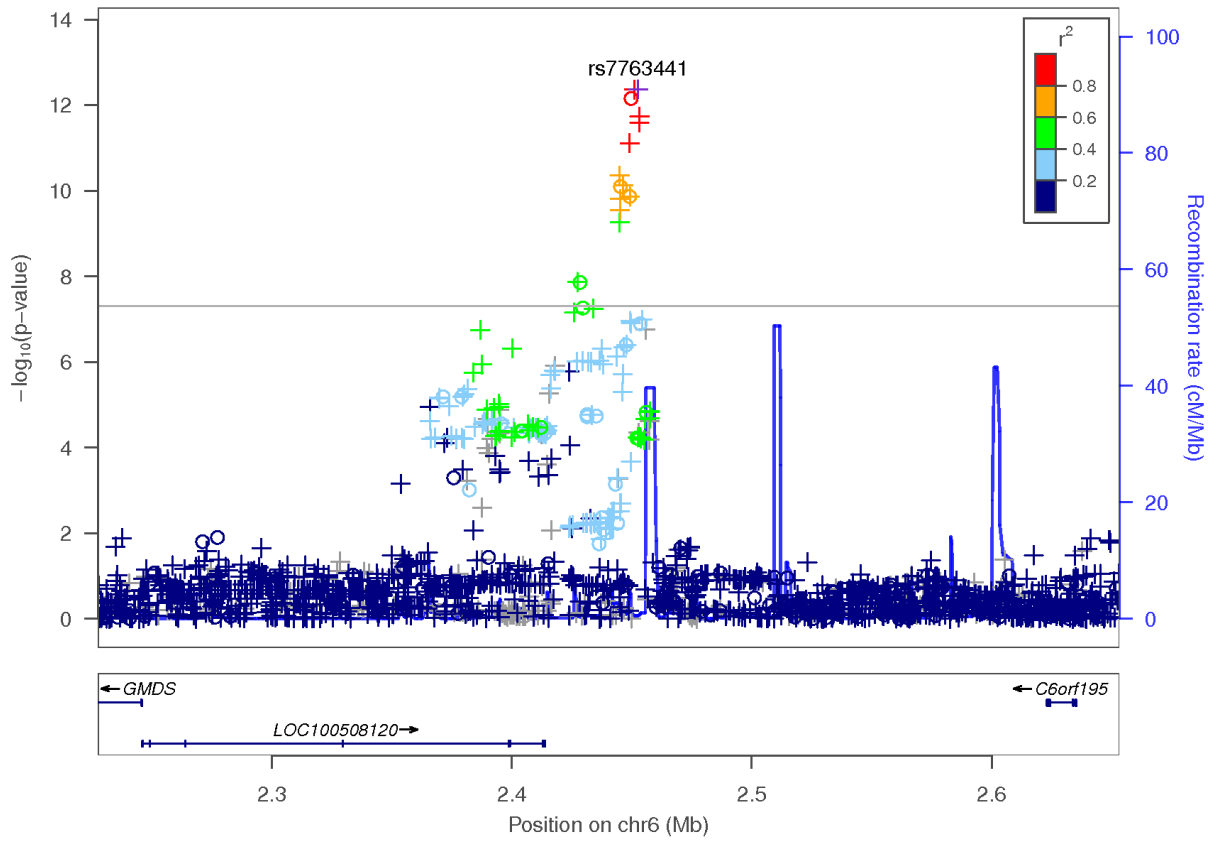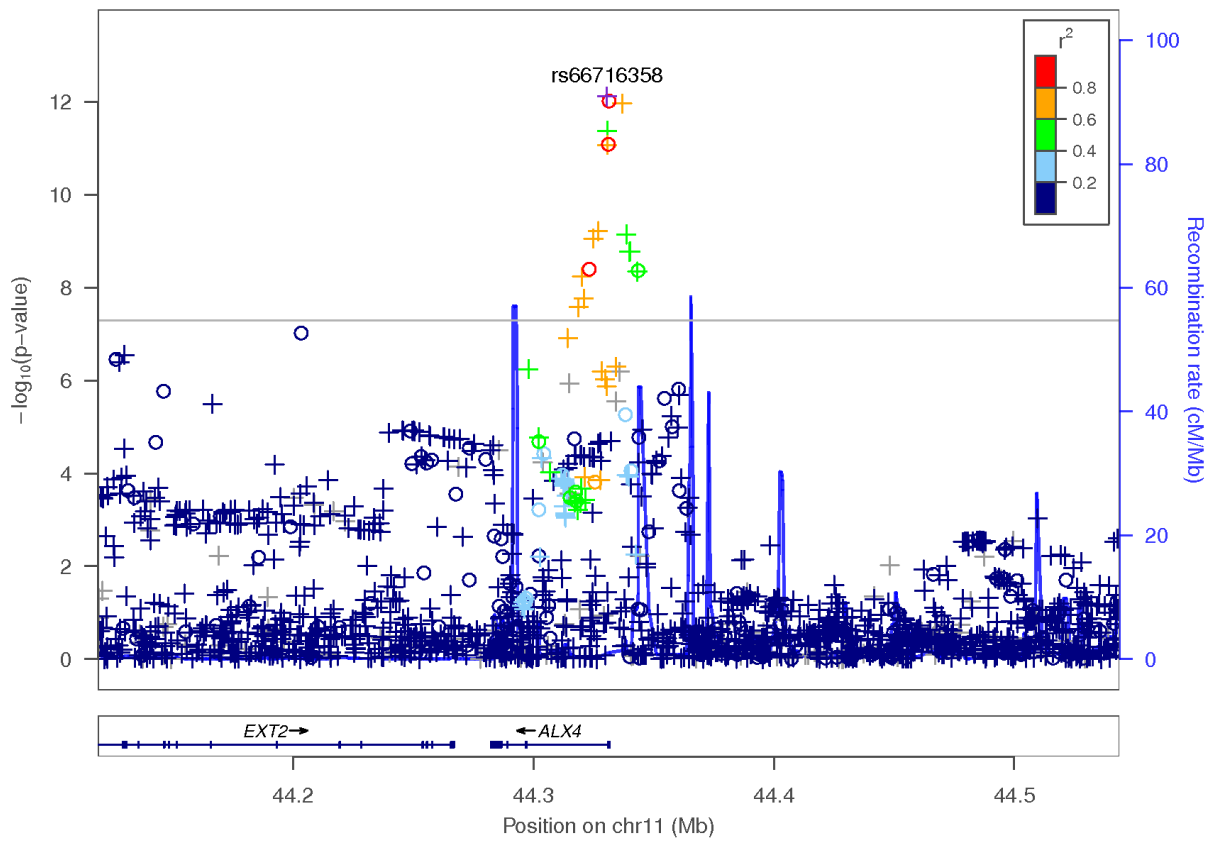

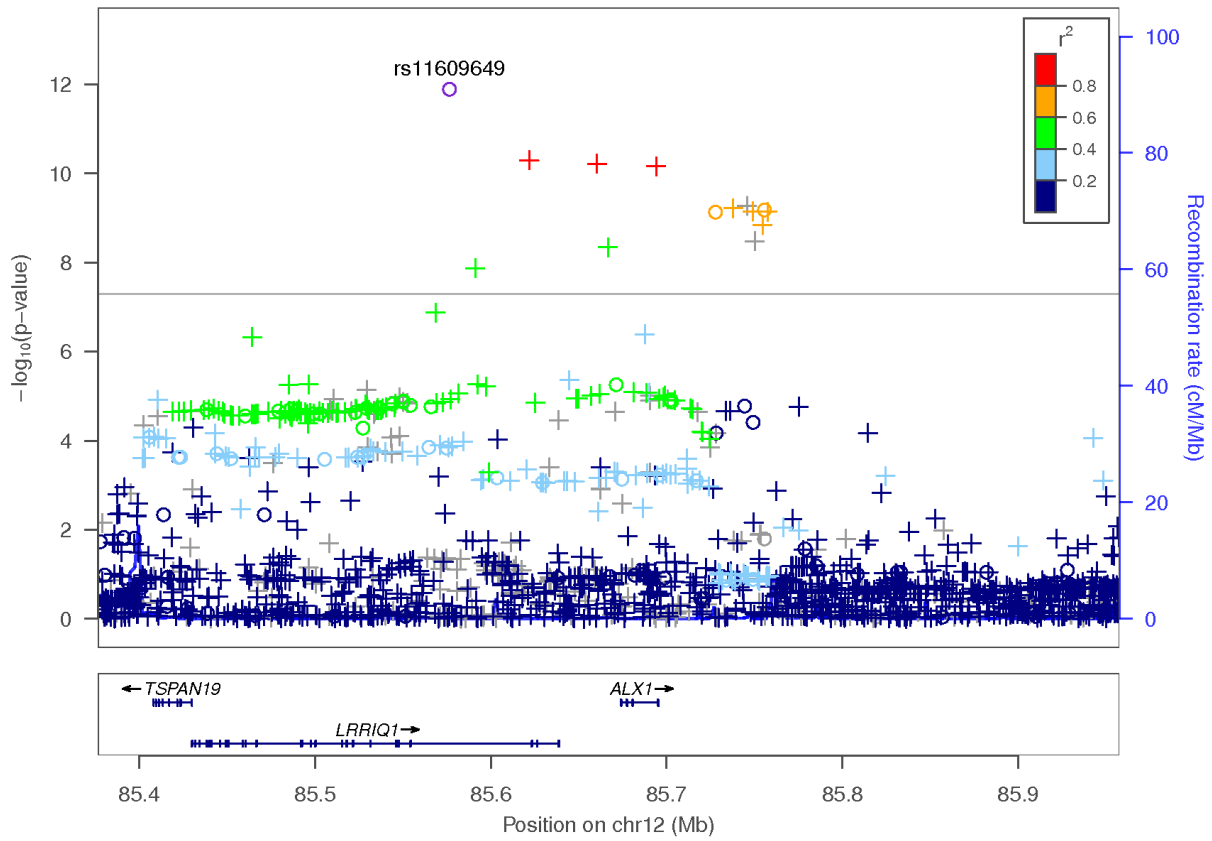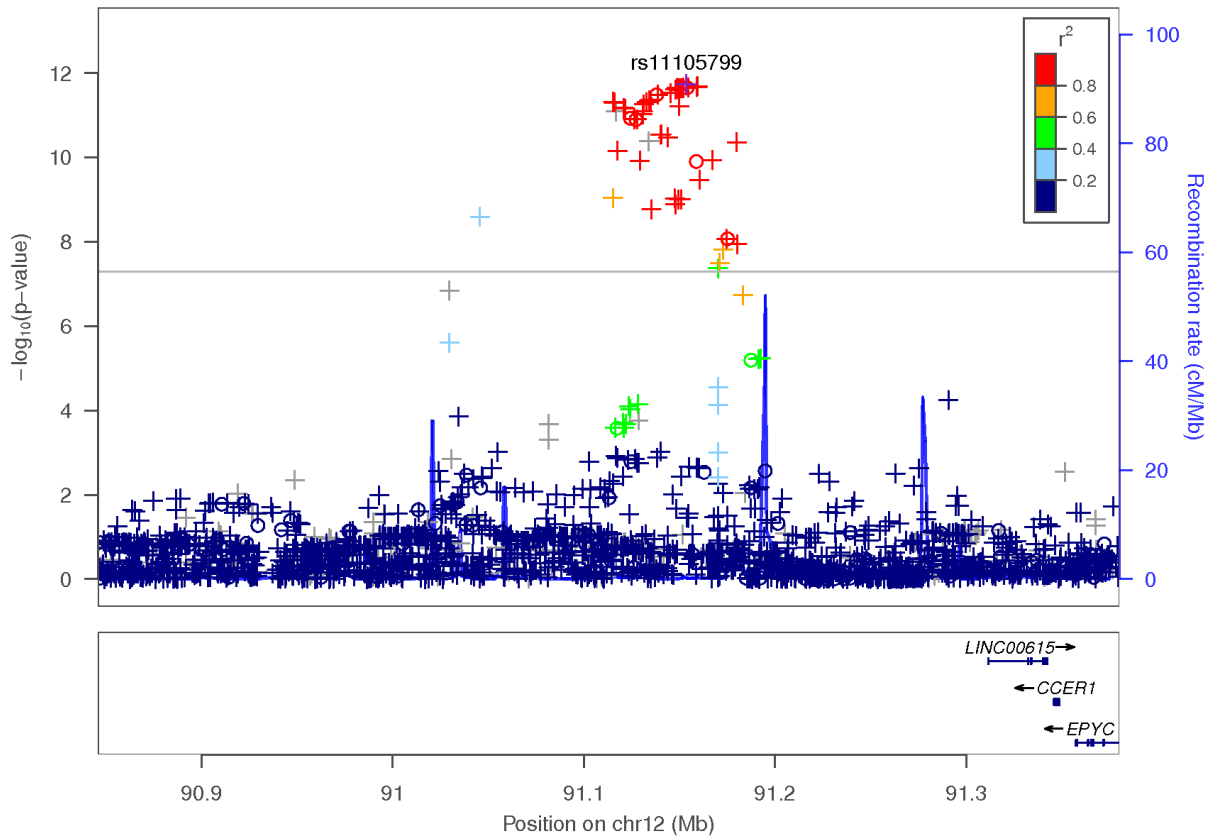

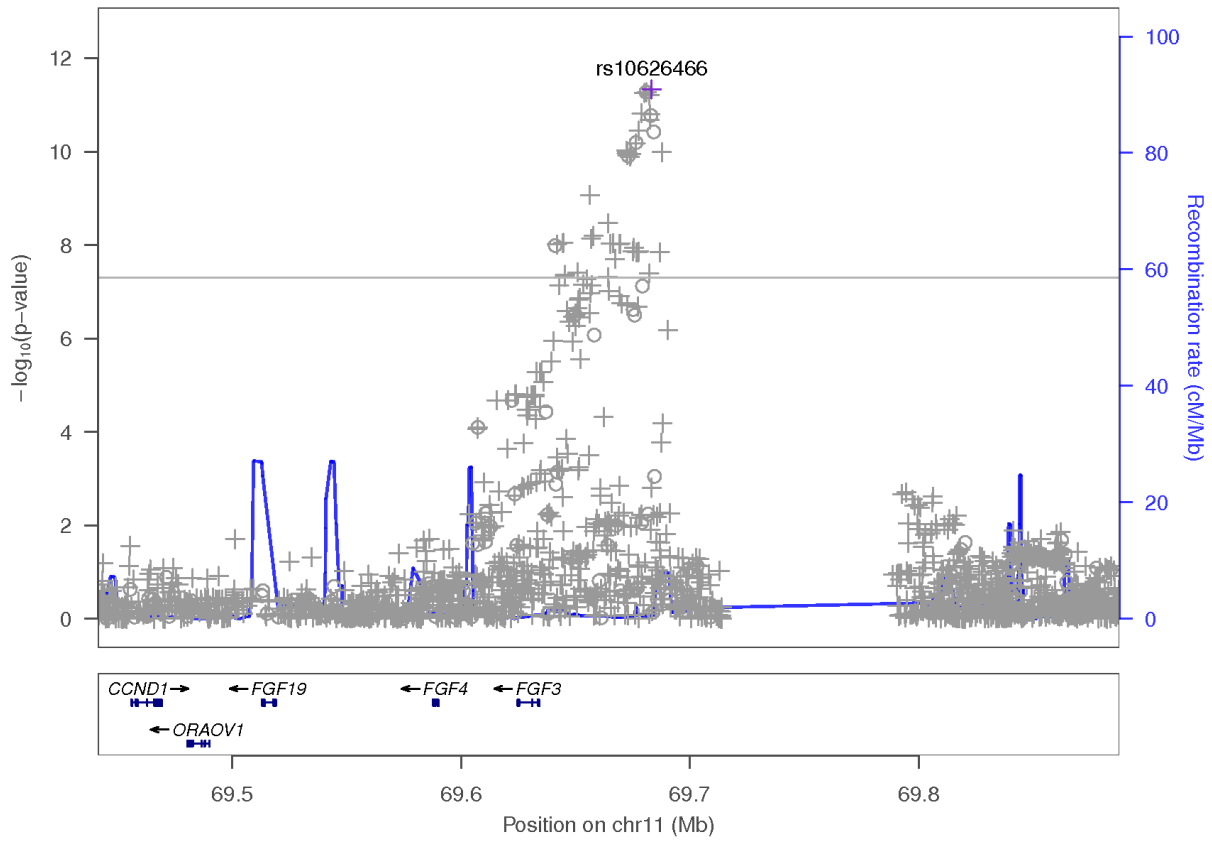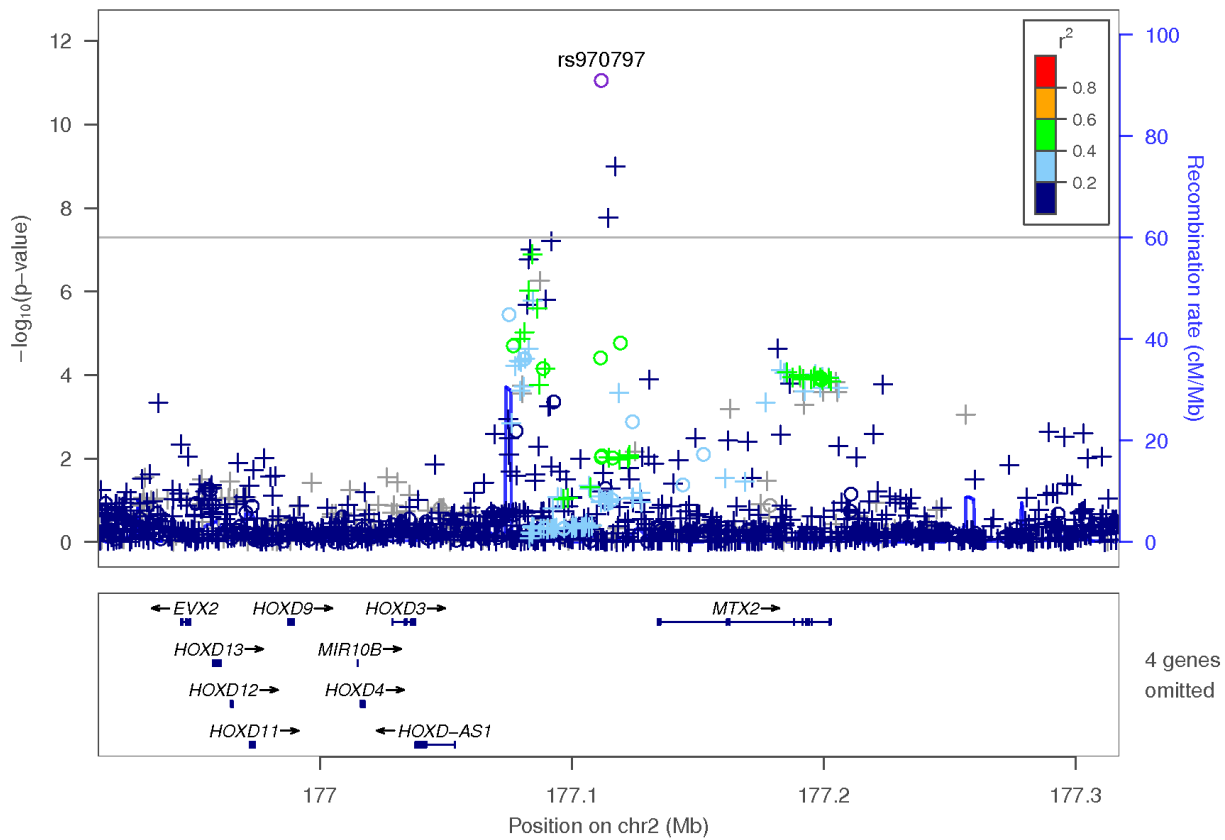



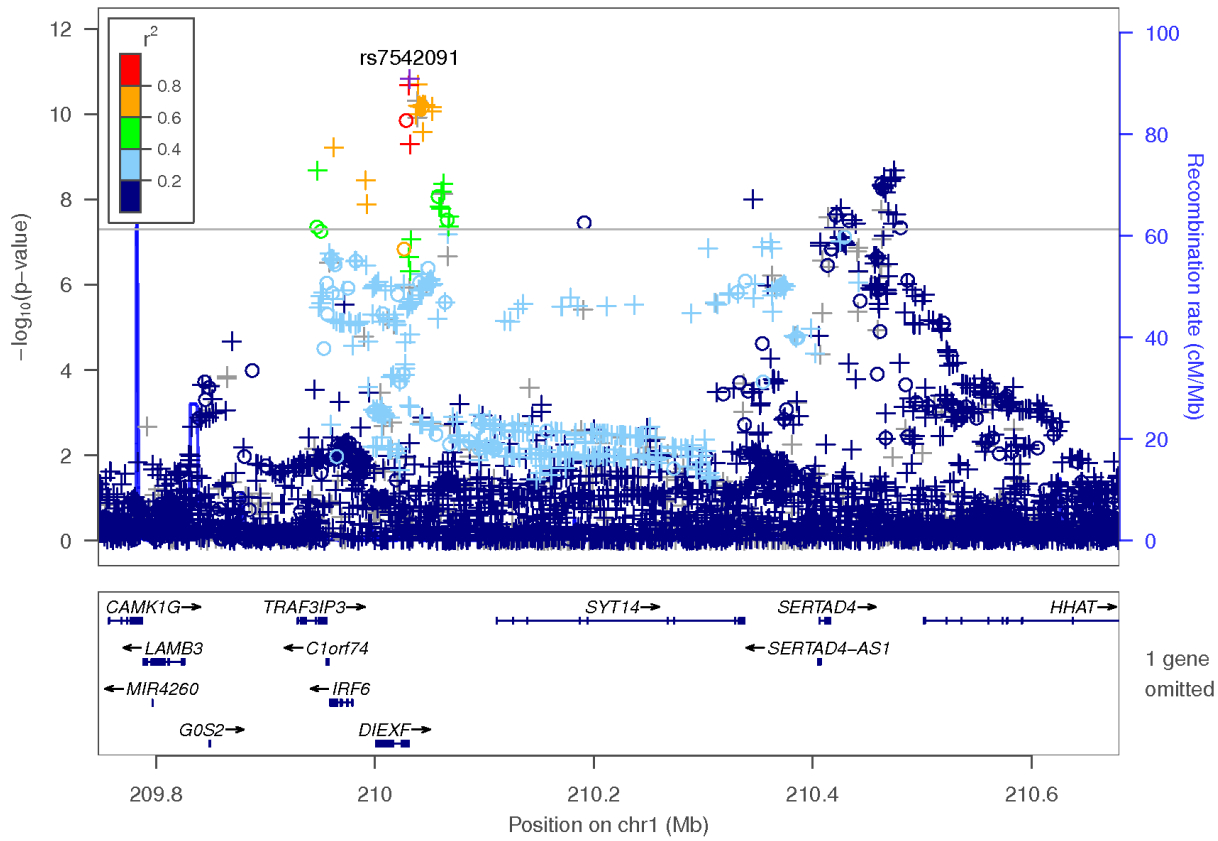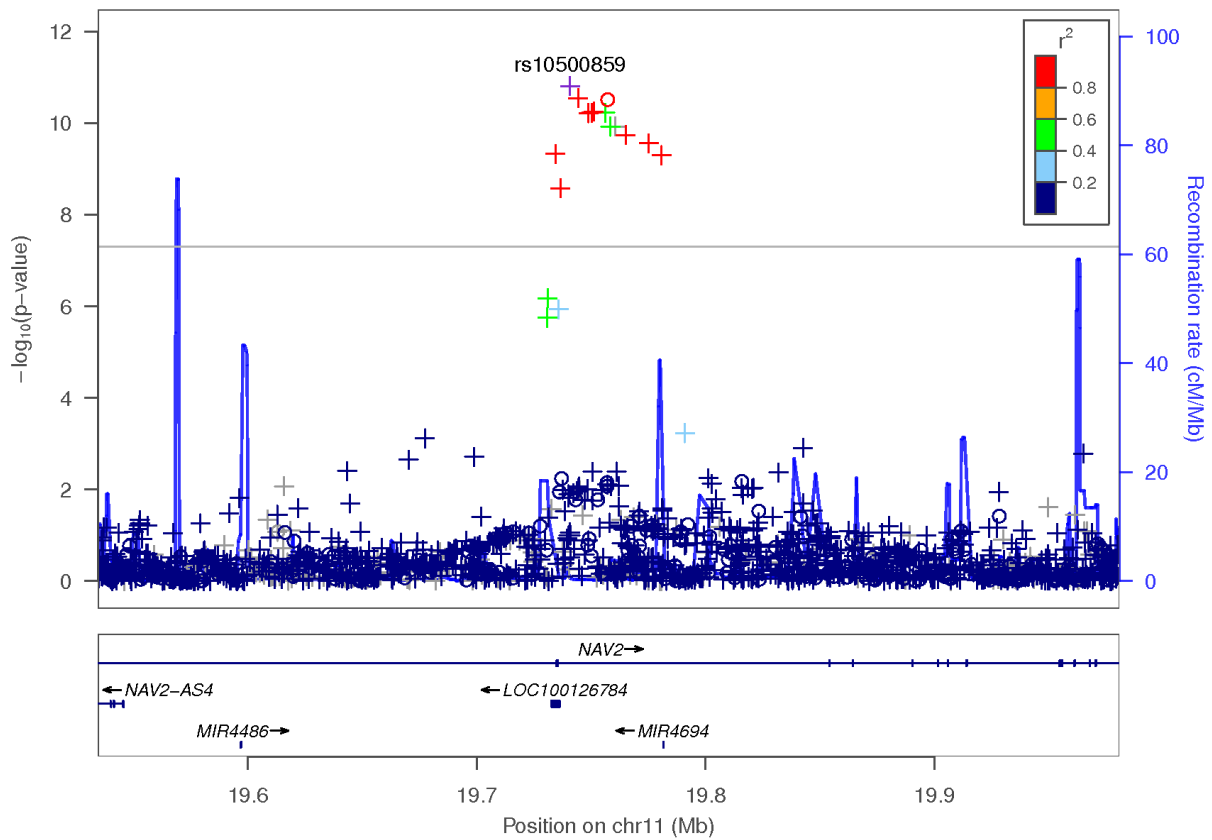

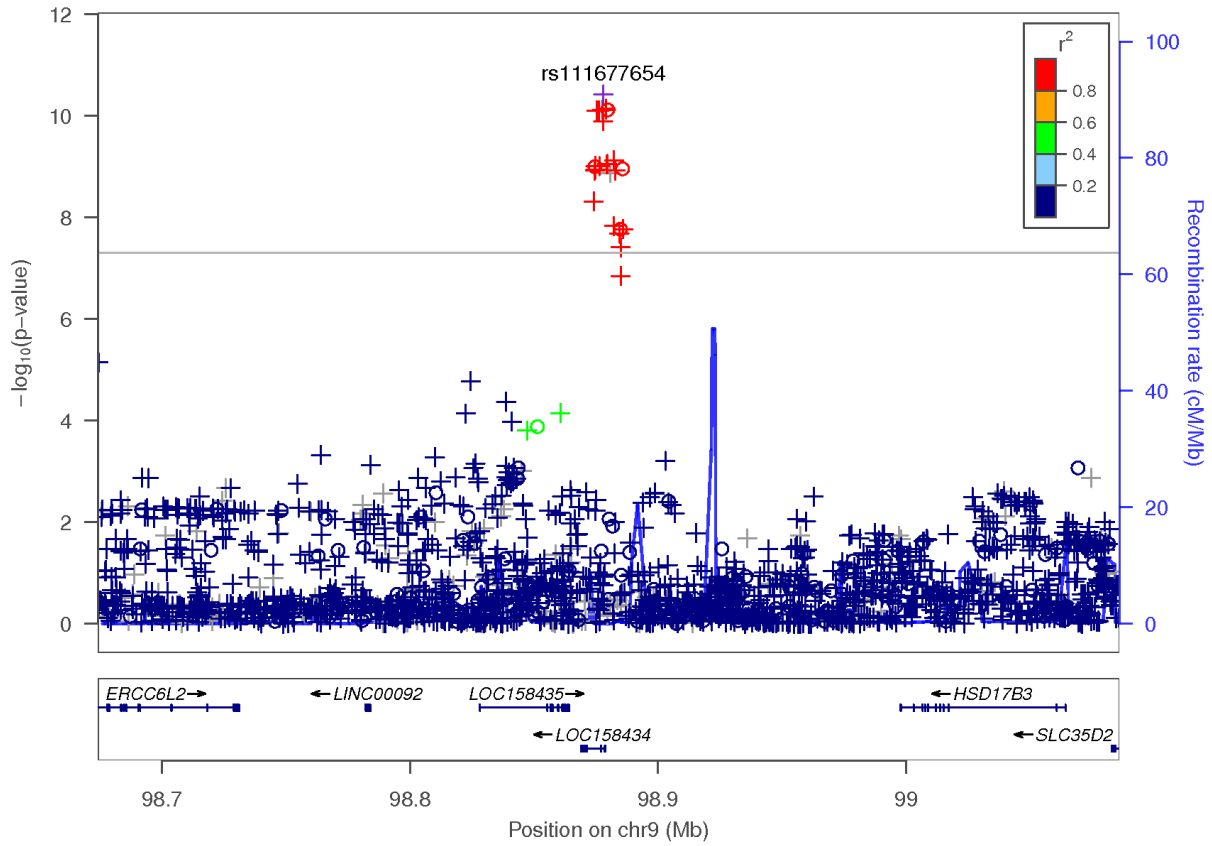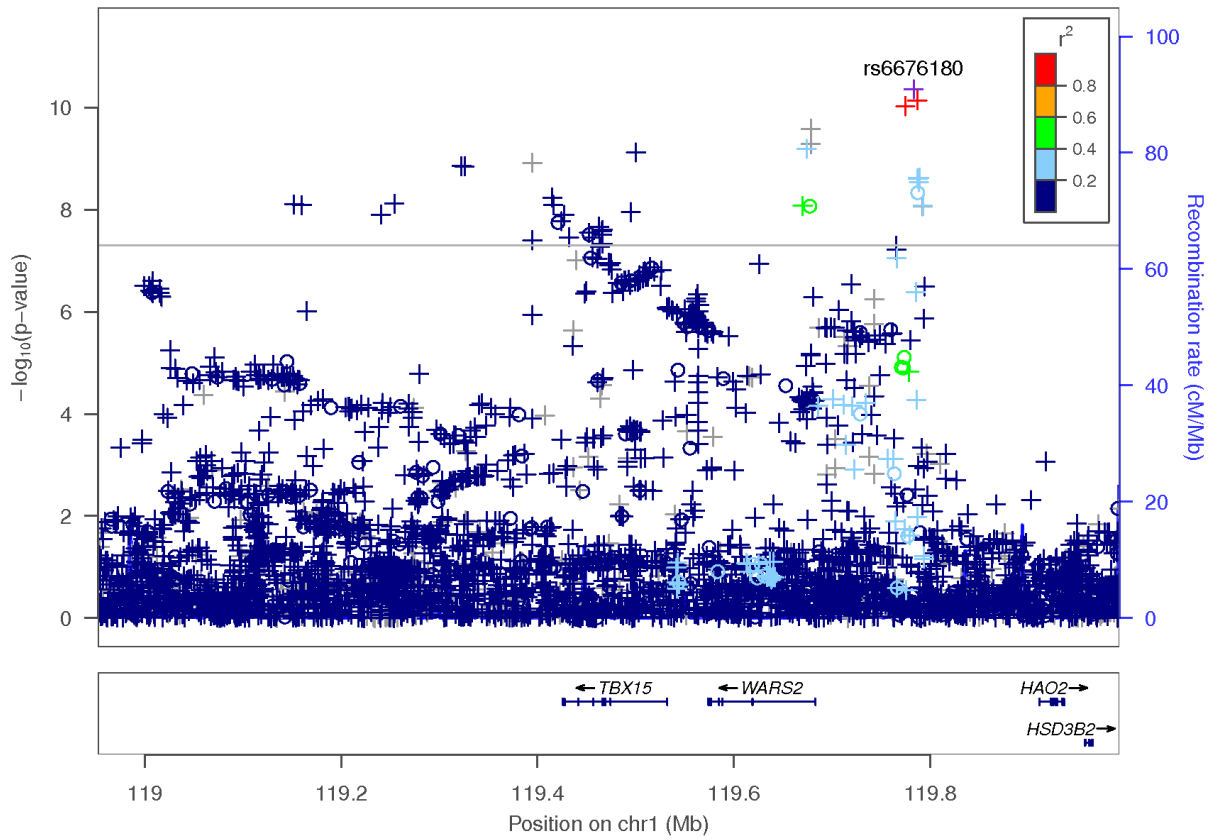

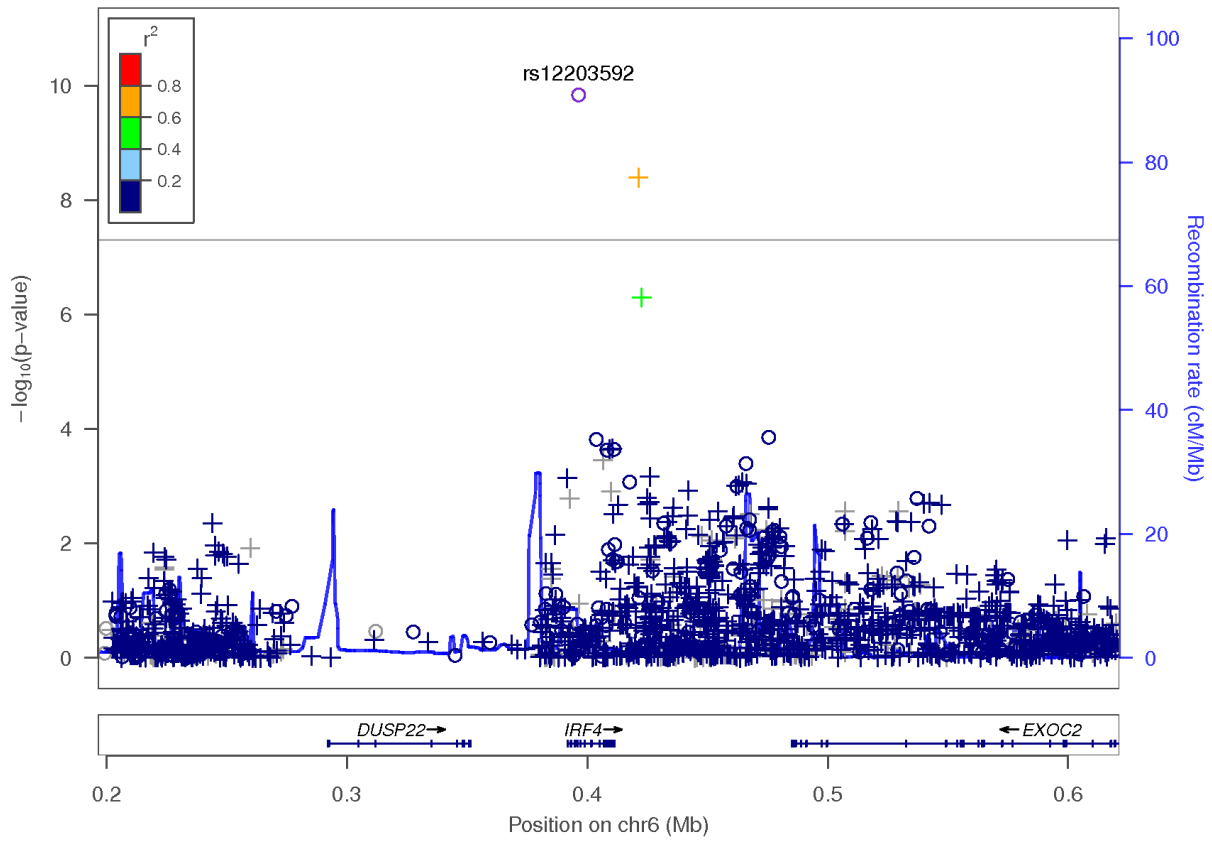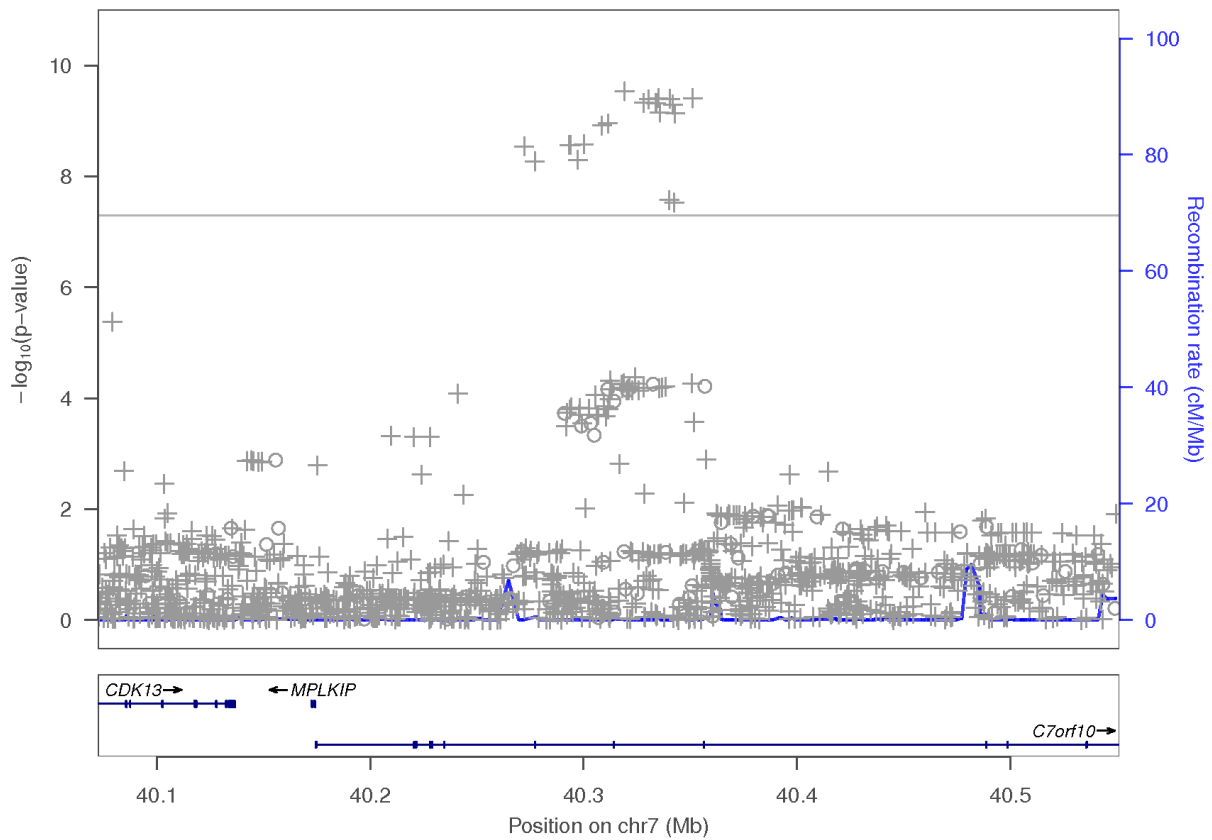

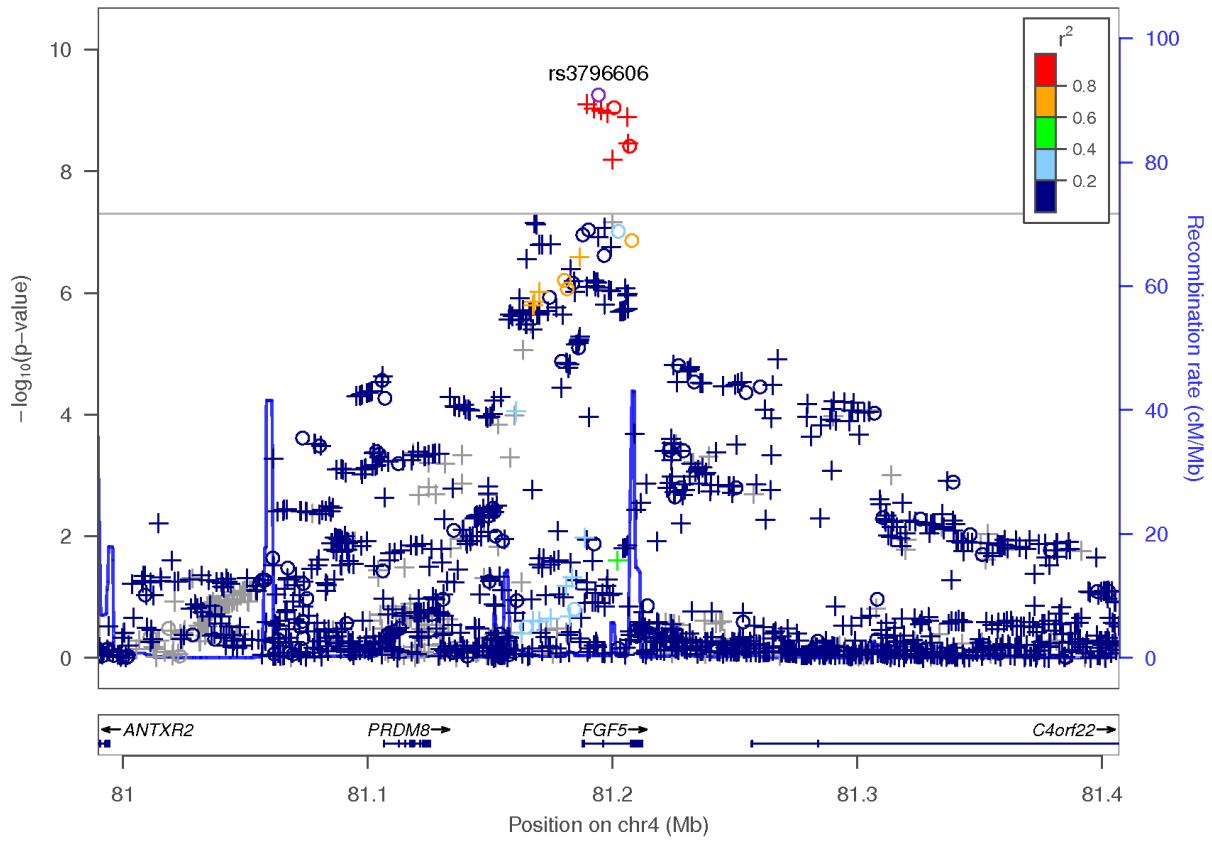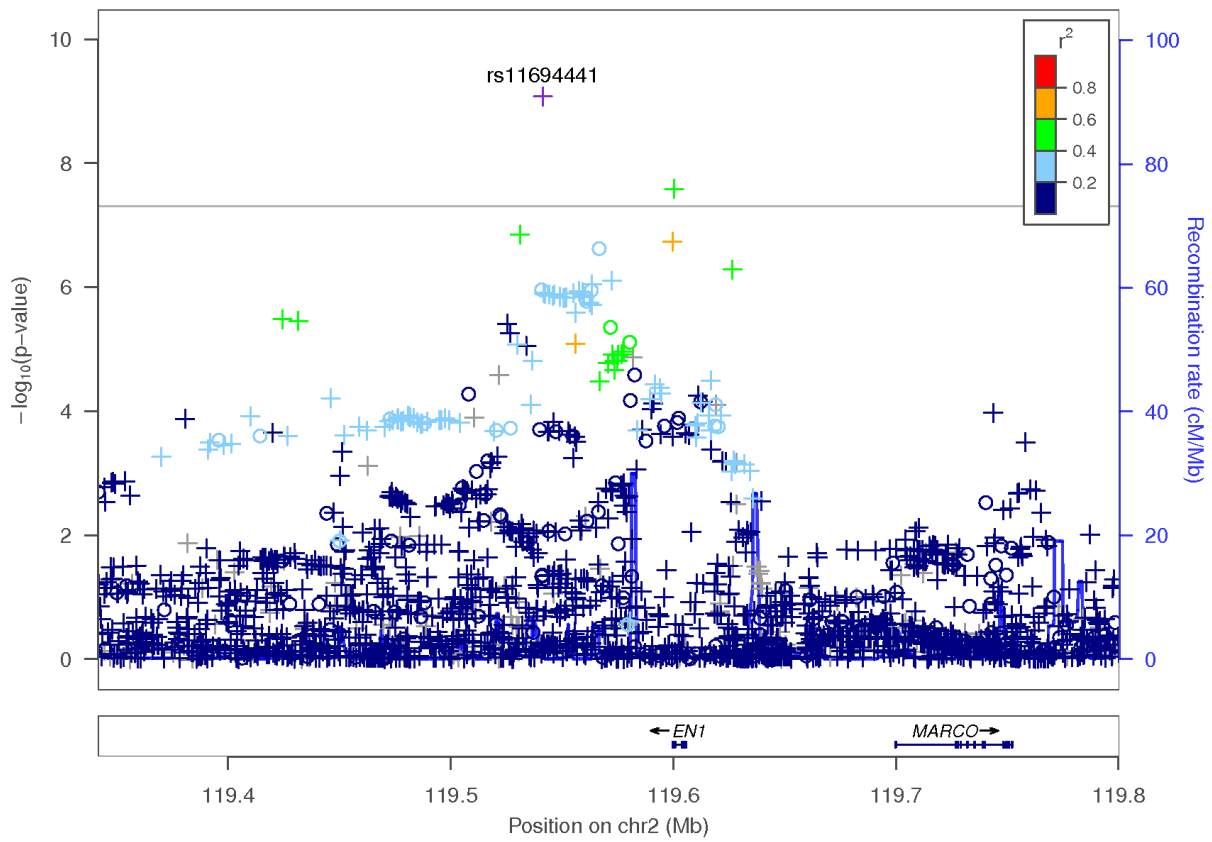

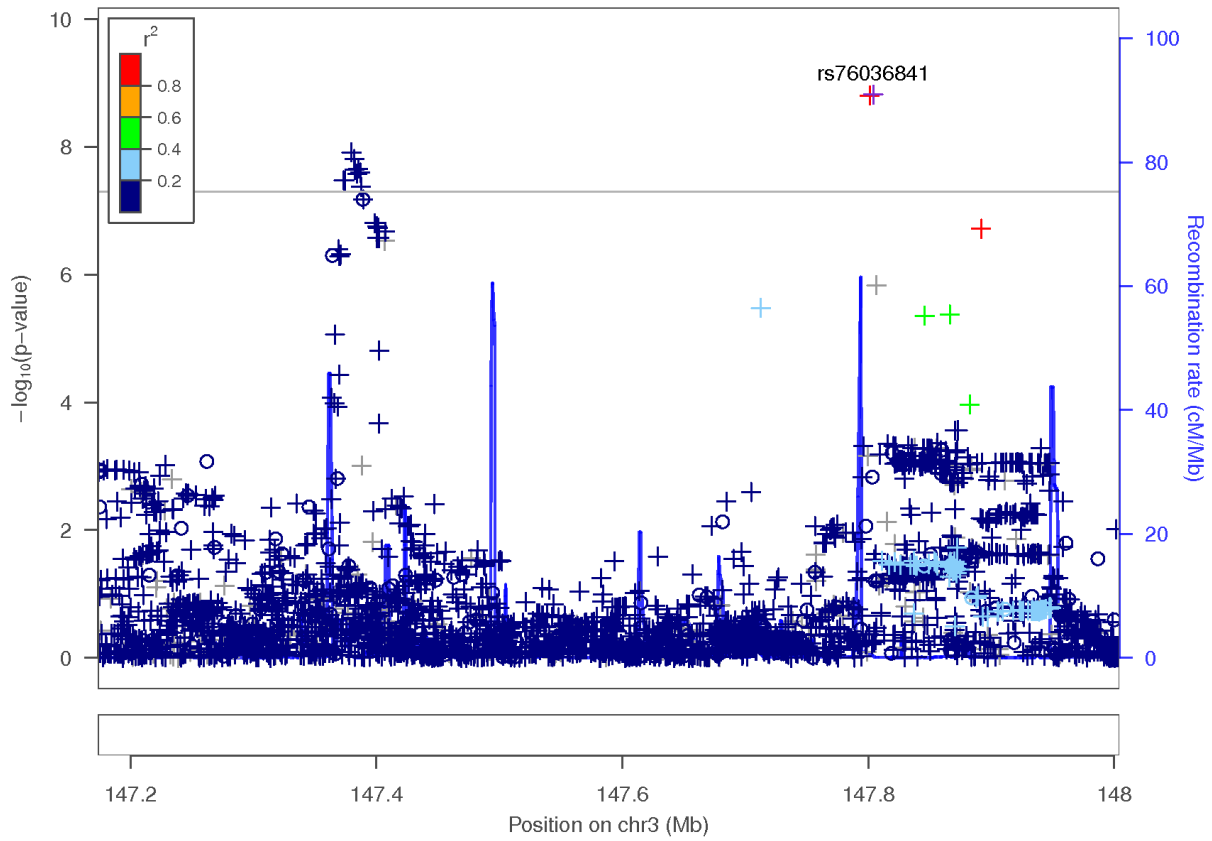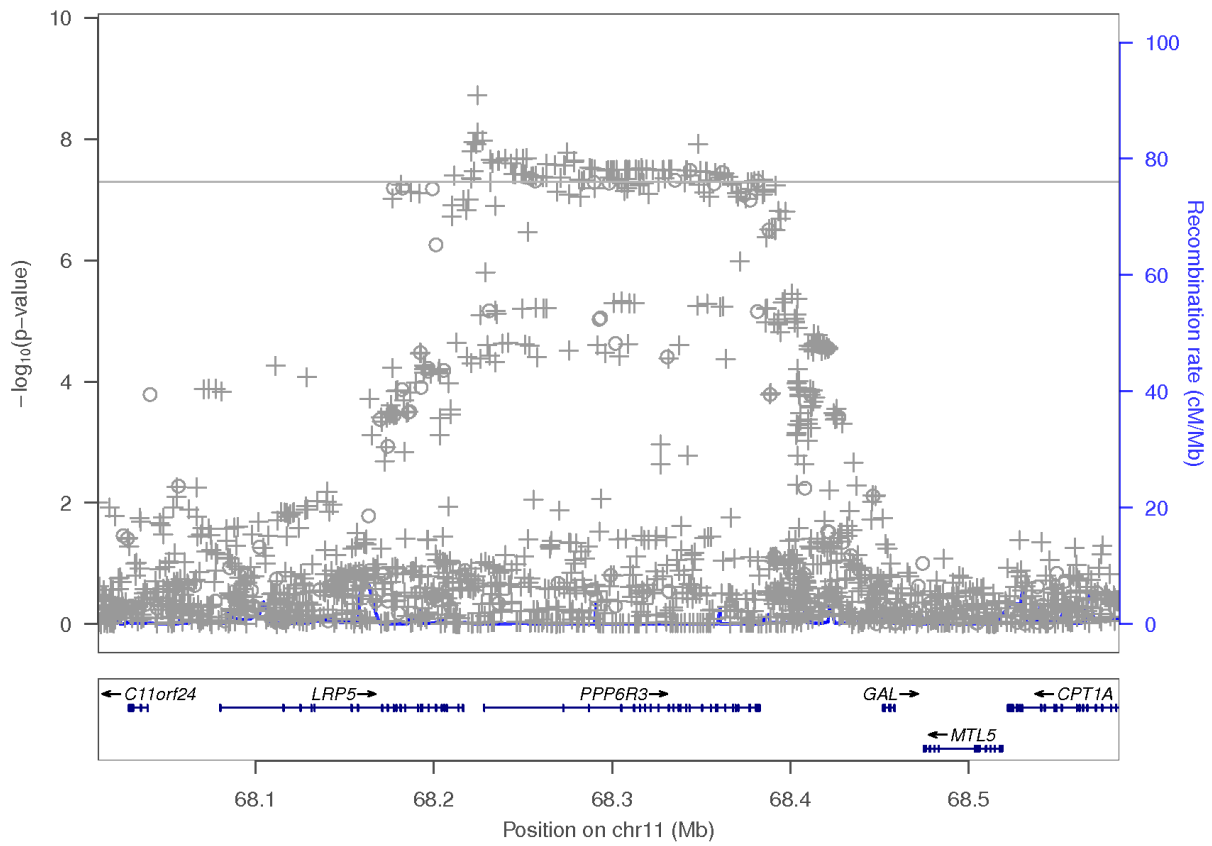

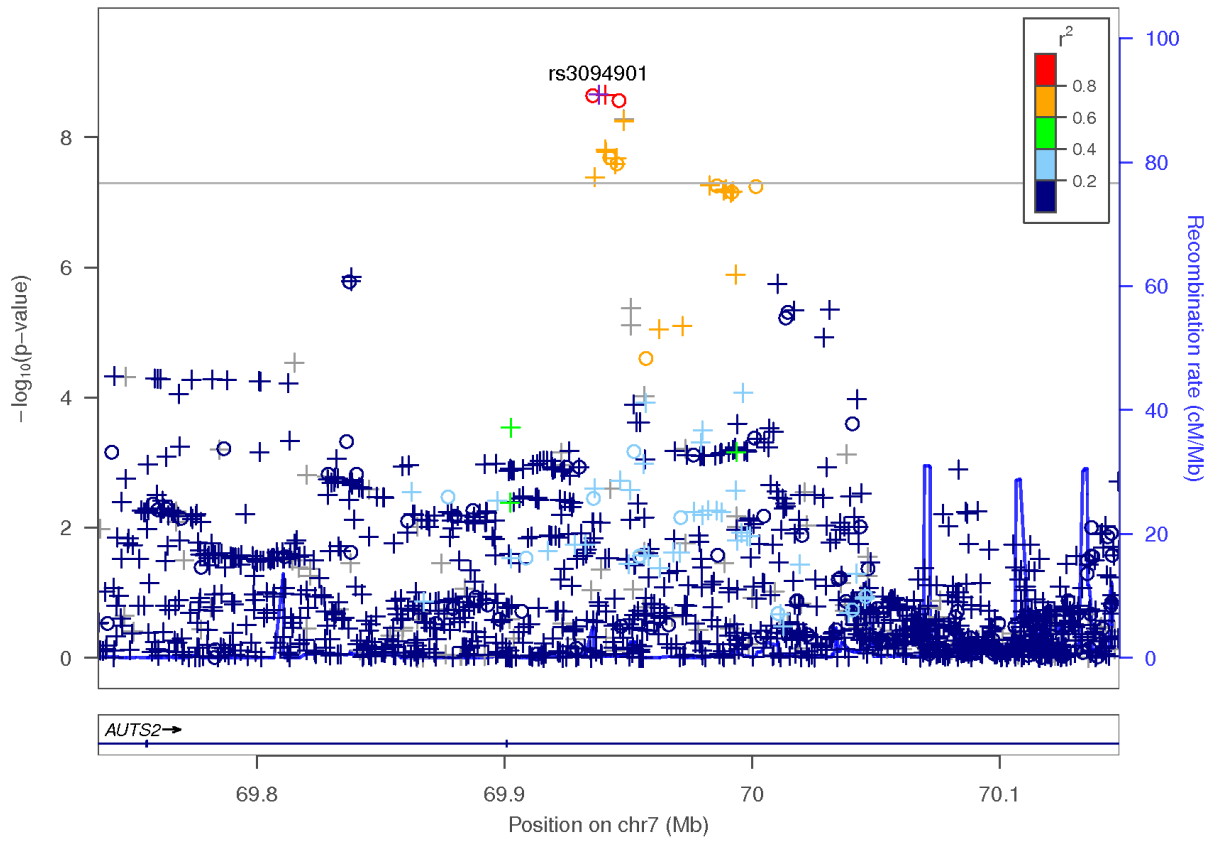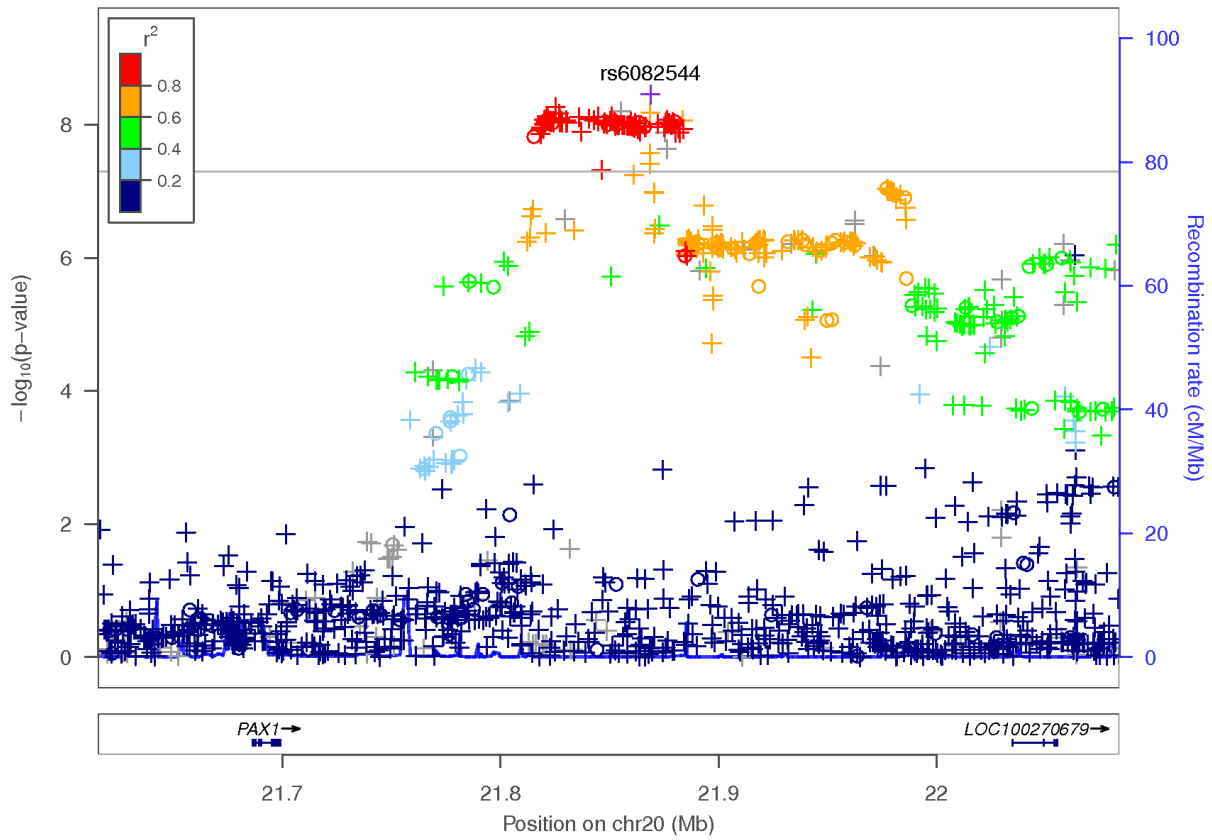

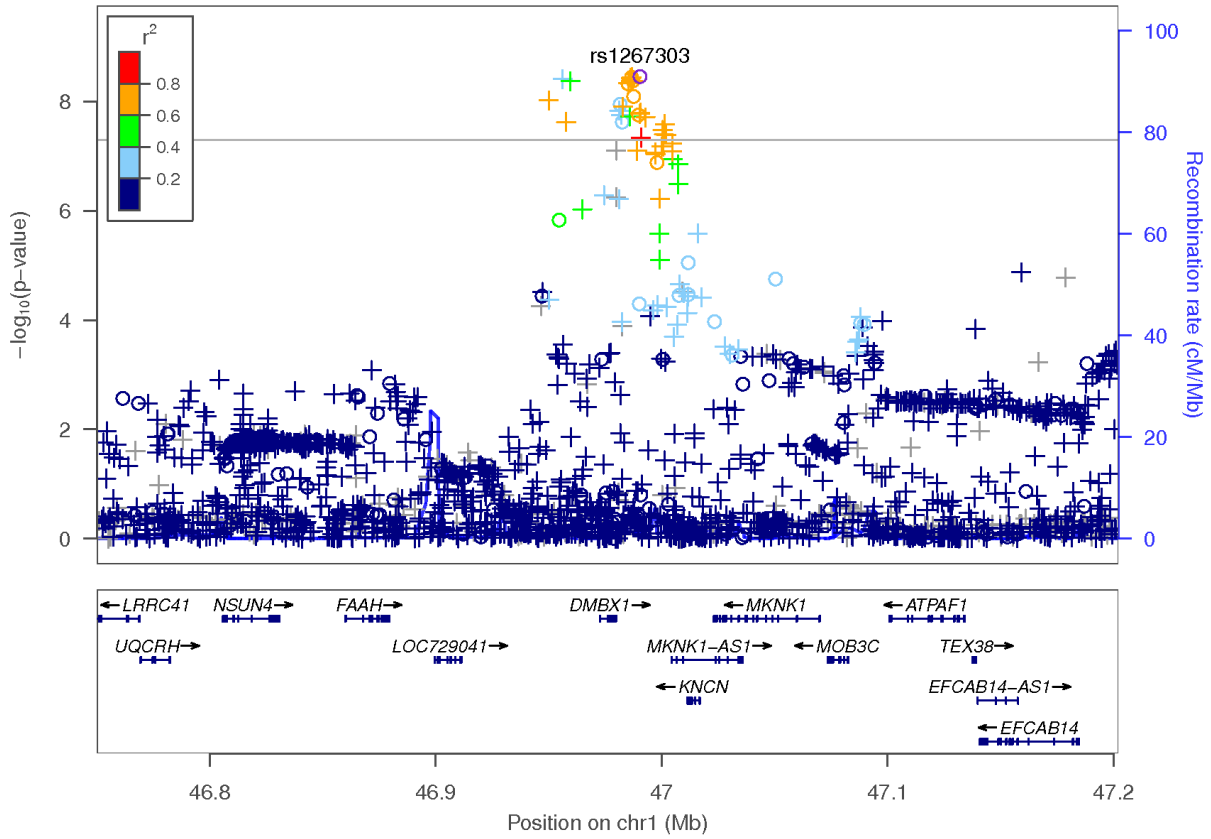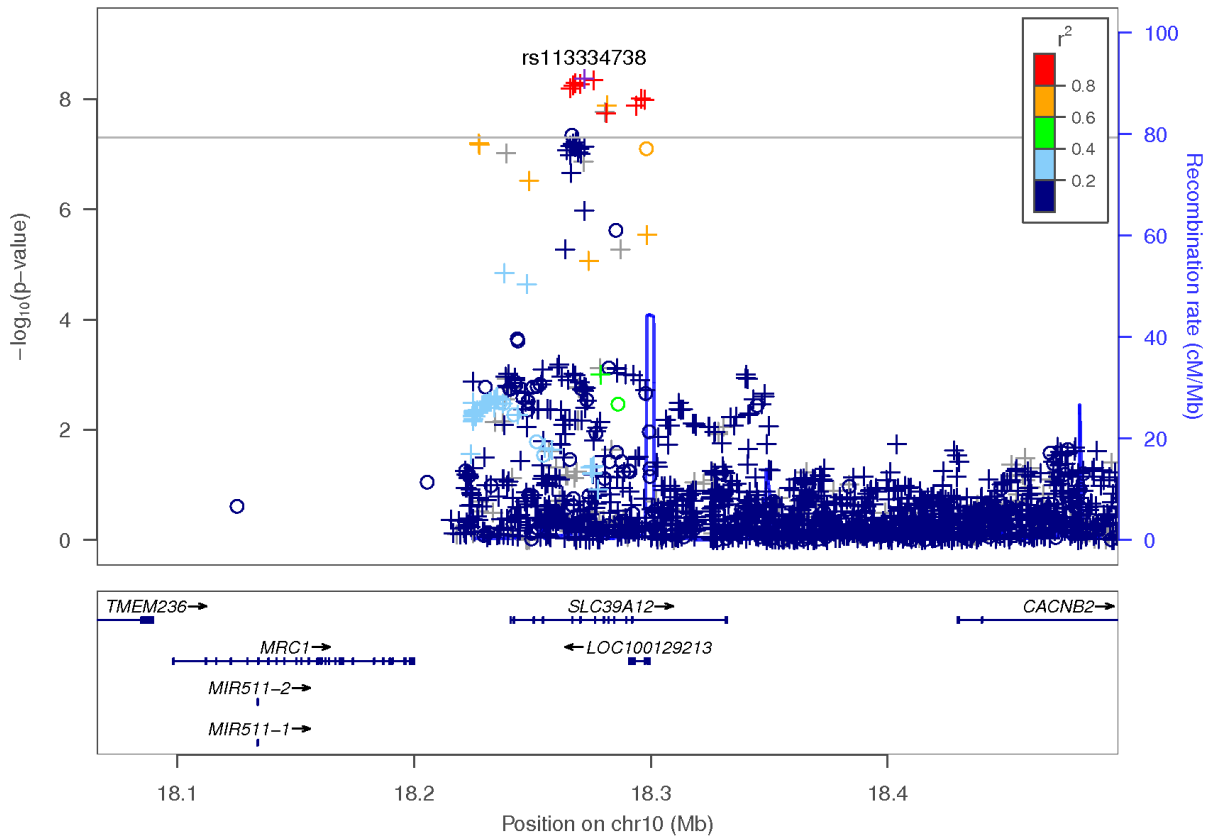

Supplement: NIHMS780506-supplement-17.pdf [file NIHMS780506-supplement-17.pdf]
