# Supplementary material
Source: PubMed Central journal article supplement (PMC5207801)

# Analysis Summary: morphology, chin\_dimple

## Phenotype Description

morphology, question chin\_dimple

## Phenotype Statistics

The following table shows demographics of unrelated, European individuals included in the GWAS.

| Phenotype   | Group   | Total | M     | F     | (0,30] | (30,45] | (45,60] | (60,Inf] |
|-------------|---------|-------|-------|-------|--------|---------|---------|----------|
| chin_dimple | case    | 58032 | 29963 | 28069 | 8104   | 18584   | 14864   | 16480    |
|             | control | 13457 | 8816  | 4641  | 2235   | 4725    | 3432    | 3065     |

The following table shows the phenotypic distribution across 23andMe genotyping platforms for individuals included in the GWAS.

| Phenotype   | Group   | Total | v1/v2 | v3    | v4   |
|-------------|---------|-------|-------|-------|------|
| chin_dimple | case    | 58032 | 7160  | 48440 | 2432 |
|             | control | 13457 | 1569  | 11313 | 575  |

## Null Model with Covariates

The following table shows results of fitting a model for the trait based on just the covariates. Principal coordinates have been standardized, so these effect sizes are in units of standard deviations.

|      | Estimate | Std. Error | z value | Pr(> z )               | LRT   | Pr(>Chi)               |
|------|----------|------------|---------|------------------------|-------|------------------------|
| age  | 0.00829  | 0.000617   | 13.4    | $4.6 \times 10^{-41}$  | 181.9 | $1.9 \times 10^{-41}$  |
| sexF | 0.56989  | 0.020023   | 28.5    | $3.4 \times 10^{-178}$ | 836.5 | $6.2 \times 10^{-184}$ |
| pc.0 | -0.05713 | 0.010215   | -5.6    | $2.2 \times 10^{-8}$   | 32.4  | $1.2 \times 10^{-8}$   |
| pc.1 | 0.00910  | 0.009626   | 0.9     | 0.34                   | 0.9   | 0.34                   |
| pc.2 | -0.03572 | 0.009653   | -3.7    | 0.00022                | 13.6  | 0.00023                |
| pc.3 | -0.01069 | 0.009668   | -1.1    | 0.27                   | 1.2   | 0.27                   |
| pc.4 | -0.00738 | 0.009634   | -0.8    | 0.44                   | 0.6   | 0.44                   |

## SNP-level QC information

The following table shows results for QC filters on the genotyped data:

|                         | failed | passed  |
|-------------------------|--------|---------|
| no filters              | 0      | 1030430 |
| not V1-only, chrM, chrY | 4790   | 1025640 |
| parent-offspring test   | 2129   | 1023511 |
| MAF > 0%                | 3203   | 1020494 |
| HWE > 1e-20             | 48225  | 972832  |
| gt.rate > 90%           | 30775  | 952826  |
| batch effects           | 28267  | 945446  |

The following table shows results for QC filters on the imputed dosage data:

|                    | failed | passed   |
|--------------------|--------|----------|
| no filters         | 0      | 13733809 |
| MAF > 0%           | 0      | 13733809 |
| imputation quality | 0      | 13733809 |
| batch effects      | 2168   | 13731641 |

The following table shows results for QC filters on the merged association test results:

|                | passed   | total    |
|----------------|----------|----------|
| imputed only   | 12833621 | 12833621 |
| both passed    | 898002   | 13731623 |
| genotyped only | 47444    | 13779067 |

no test result            -16567 13762500  
 failed to converge      -224739 13537761

## Genetic Association Tests

We performed logistic regression assuming an additive model for allelic effects, using the model:

$$chin\_dimple \sim age + sex + pc.0 + pc.1 + pc.2 + pc.3 + pc.4 + genotype$$

This genome-wide association analysis includes data from 58032 cases and 13457 controls of European ancestry, filtered to remove close relatives.

The results in this report have been adjusted for a genomic control inflation factor  $\lambda=1.071$ . The equivalent inflation factor for 1000 cases and 1000 controls  $\lambda_{1000}= 1.003$  , and for 10000,  $\lambda_{10000}= 1.032$  .

## Manhattan Plot

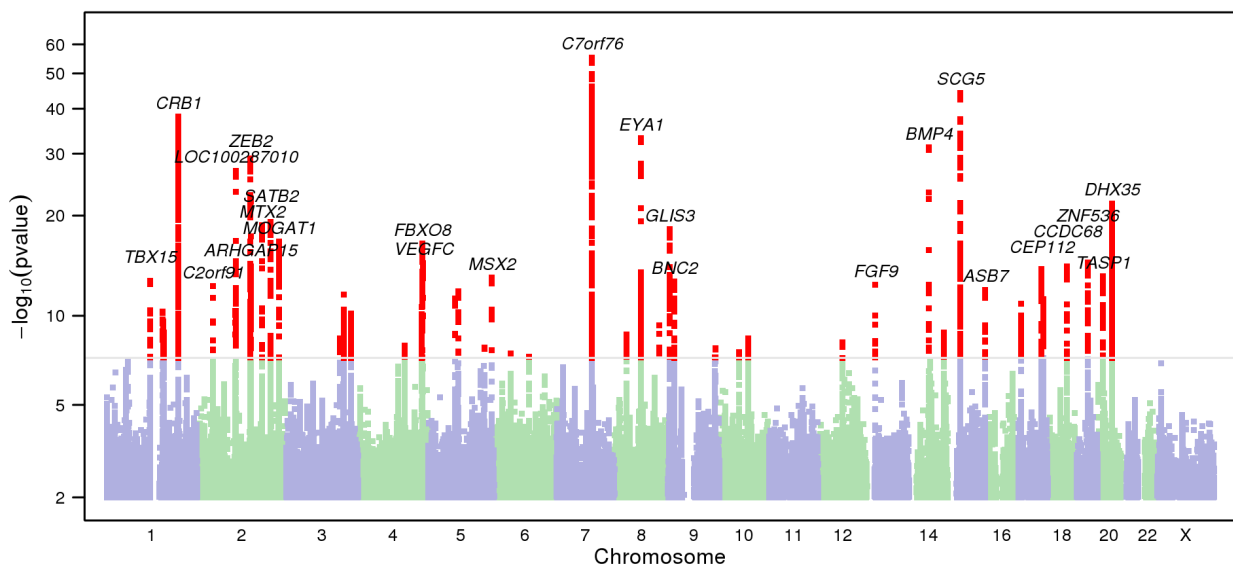

## Q-Q Plot of GWAS Results

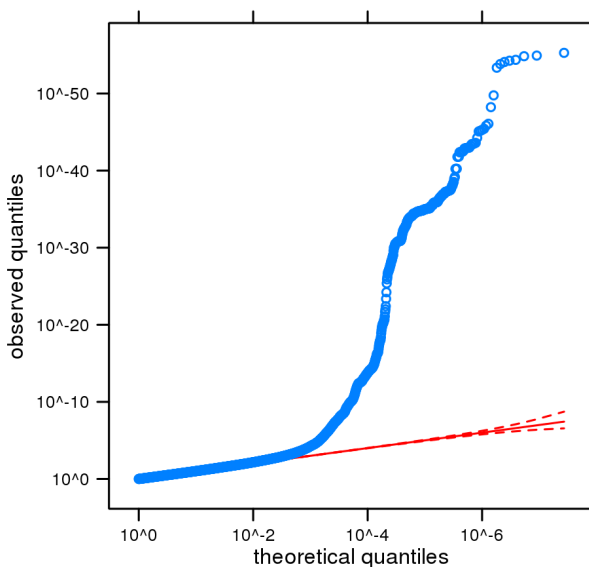

## Index SNPs for Strongest Associations

| cytoband | assay.name | scaffold | position | alleles | src | pvalue                | OR    | 95% CI        | gene.context        |
|----------|------------|----------|----------|---------|-----|-----------------------|-------|---------------|---------------------|
| 7q21.3   | rs11768577 | chr7     | 96143804 | G/T     | I   | $5.3 \times 10^{-56}$ | 1.352 | [1.303,1.402] | C7orf76--[]---SHFM1 |

|          |             |       |           |     |   |                       |       |               |                           |
|----------|-------------|-------|-----------|-----|---|-----------------------|-------|---------------|---------------------------|
| 15q13.3  | rs6494598   | chr15 | 32995468  | A/C | I | 5.6×10 <sup>-45</sup> | 1.222 | [1.188,1.256] | SCG5-[ ]--GREM1           |
| 1q31.3   | rs2476023   | chr1  | 197351039 | C/G | I | 9.7×10 <sup>-39</sup> | 0.793 | [0.765,0.822] | [CRB1]                    |
| 8q13.3   | rs10504499  | chr8  | 72036904  | G/T | I | 7.9×10 <sup>-34</sup> | 1.292 | [1.240,1.346] | XKR9---[ ]--EYA1          |
| 14q22.2  | rs72678242  | chr14 | 54255510  | A/G | I | 6.0×10 <sup>-32</sup> | 0.785 | [0.755,0.817] | DDHD1---[ ]---BMP4        |
| 2q22.3   | rs17479393  | chr2  | 145653287 | A/T | I | 8.1×10 <sup>-30</sup> | 0.832 | [0.806,0.858] | ZEB2---[ ]                |
| 2q12.1   | rs10175706  | chr2  | 104631814 | C/T | I | 1.3×10 <sup>-27</sup> | 0.853 | [0.829,0.878] | [ ]---LOC100287010        |
| 20q12    | rs6028446   | chr20 | 38101545  | A/T | I | 2.1×10 <sup>-22</sup> | 0.871 | [0.847,0.895] | DHX35---[ ]               |
| 2q33.1   | rs13035389  | chr2  | 199666111 | C/T | I | 6.8×10 <sup>-20</sup> | 1.139 | [1.107,1.171] | PLCL1---[ ]---SATB2       |
| 2q31.1   | rs59156997  | chr2  | 177371846 | D/I | I | 1.7×10 <sup>-19</sup> | 0.834 | [0.801,0.868] | MTX2---[ ]---HNRNPA3      |
| 9p24.2   | rs4237150   | chr9  | 4290085   | C/G | I | 5.6×10 <sup>-19</sup> | 0.879 | [0.855,0.905] | [GLIS3]                   |
| 2q36.1   | rs4674676   | chr2  | 223529112 | A/G | I | 1.6×10 <sup>-17</sup> | 0.841 | [0.808,0.876] | FARSB-[ ]--MOGAT1         |
| 4q34.1   | rs17275866  | chr4  | 175071486 | A/G | I | 2.6×10 <sup>-17</sup> | 0.875 | [0.849,0.903] | HAND2---[ ]--FBXO8        |
| 19q12    | rs55700449  | chr19 | 30982165  | A/G | I | 2.8×10 <sup>-15</sup> | 0.850 | [0.817,0.886] | [ZNF536]                  |
| 4q34.3   | rs12509218  | chr4  | 177587237 | A/G | I | 3.0×10 <sup>-15</sup> | 0.838 | [0.803,0.875] | SPCS3---[ ]--VEGFC        |
| 2q22.3   | rs11688237  | chr2  | 144560021 | A/G | I | 3.7×10 <sup>-15</sup> | 0.894 | [0.870,0.920] | ARHGAP15---[ ]---GTDC1    |
| 18q21.2  | rs7243821   | chr18 | 52655532  | A/G | I | 6.5×10 <sup>-15</sup> | 1.130 | [1.096,1.165] | CCDC68---[ ]---TCF4       |
| 17q24.1  | rs11650175  | chr17 | 63743650  | C/T | I | 1.1×10 <sup>-14</sup> | 0.891 | [0.865,0.918] | [CEP112]                  |
| 20p12.1  | rs2073323   | chr20 | 13514434  | C/G | I | 6.1×10 <sup>-14</sup> | 1.129 | [1.094,1.165] | [TASP1]                   |
| 5q35.2   | rs4868444   | chr5  | 174160113 | C/T | I | 7.4×10 <sup>-14</sup> | 1.187 | [1.134,1.242] | MSX2-[ ]---DRD1           |
| 1p12     | rs1766786   | chr1  | 119452500 | G/T | I | 1.6×10 <sup>-13</sup> | 0.851 | [0.816,0.888] | [TBX15]                   |
| 9p22.2   | rs10962767  | chr9  | 16958463  | A/C | I | 1.8×10 <sup>-13</sup> | 0.900 | [0.875,0.925] | BNC2--[ ]---CNTLN         |
| 13q12.11 | rs73168105  | chr13 | 22713708  | G/T | I | 3.3×10 <sup>-13</sup> | 1.149 | [1.107,1.193] | FGF9---[ ]                |
| 2p21     | rs6740960   | chr2  | 42181679  | A/T | I | 4.3×10 <sup>-13</sup> | 1.117 | [1.084,1.151] | C2orf91[ ]--PKDCC         |
| 15q26.3  | rs7167736   | chr15 | 101206638 | G/T | I | 8.8×10 <sup>-13</sup> | 0.880 | [0.850,0.912] | ASB7--[ ]---ALDH1A3       |
| 5q14.2   | rs10078545  | chr5  | 82124190  | A/T | I | 1.2×10 <sup>-12</sup> | 1.112 | [1.080,1.145] | ATP6AP1L---[ ]---TMEM167A |
| 3q25.32  | rs11713363  | chr3  | 157828322 | C/T | I | 2.3×10 <sup>-12</sup> | 0.890 | [0.861,0.920] | [RSCR1]                   |
| 5q13.3   | rs199880074 | chr5  | 73483120  | D/I | I | 4.9×10 <sup>-12</sup> | 0.893 | [0.865,0.922] | ARHGEF28---[ ]---ENC1     |
| 17q24.3  | rs56347314  | chr17 | 69123106  | C/T | I | 5.4×10 <sup>-12</sup> | 1.108 | [1.076,1.140] | KCNJ2---[ ]---SOX9        |
| 17p13.1  | rs80067372  | chr17 | 7452752   | A/G | I | 1.2×10 <sup>-11</sup> | 1.115 | [1.080,1.150] | [TNFSF12-TNFSF13]         |
| 4q34.1   | rs12505328  | chr4  | 174378004 | C/T | I | 2.1×10 <sup>-11</sup> | 1.106 | [1.074,1.139] | SCRG1--[ ]--HAND2         |
| 1q22     | rs11589479  | chr1  | 155033308 | A/G | I | 4.7×10 <sup>-11</sup> | 1.131 | [1.090,1.173] | [ADAM15]                  |
| 3q26.32  | rs2133593   | chr3  | 177301992 | A/C | I | 6.6×10 <sup>-11</sup> | 0.904 | [0.878,0.932] | TBL1XR1---[ ]---KCNMB2    |
| 8q24.13  | rs12541121  | chr8  | 123101743 | A/G | I | 4.7×10 <sup>-10</sup> | 1.095 | [1.064,1.127] | HAS2---[ ]---ZHX2         |
| 14q32.13 | rs7161418   | chr14 | 95479889  | G/T | I | 1.4×10 <sup>-9</sup>  | 1.106 | [1.070,1.143] | GSC---[ ]--DICER1         |
| 1q23.1   | rs1336149   | chr1  | 156939175 | C/T | I | 1.5×10 <sup>-9</sup>  | 1.093 | [1.062,1.125] | [ARHGEF11]                |
| 8p12     | rs2347498   | chr8  | 32353180  | C/T | I | 1.8×10 <sup>-9</sup>  | 0.915 | [0.888,0.942] | [ ]--NRG1                 |
| 10q22.3  | rs11001765  | chr10 | 78150285  | A/C | I | 3.5×10 <sup>-9</sup>  | 0.884 | [0.848,0.921] | [C10orf11]                |
| 3q24     | rs12495832  | chr3  | 147829477 | A/G | I | 3.6×10 <sup>-9</sup>  | 0.870 | [0.830,0.911] | ZIC1---[ ]--AGTR1         |
| 12q14.3  | rs141753469 | chr12 | 66397166  | A/C | I | 5.9×10 <sup>-9</sup>  | 1.111 | [1.072,1.151] | HMG2A--[ ]---LLPH         |
| 4q28.1   | rs145365164 | chr4  | 126954652 | C/T | I | 9.6×10 <sup>-9</sup>  | 1.109 | [1.070,1.148] | FAT4---[ ]                |
| 5q33.2   | rs4958741   | chr5  | 153868262 | A/G | I | 1.3×10 <sup>-8</sup>  | 1.108 | [1.069,1.147] | HAND1--[ ]---LARP1        |
| 9q33.3   | rs62578082  | chr9  | 129277041 | A/C | I | 1.4×10 <sup>-8</sup>  | 1.140 | [1.089,1.194] | MVB12B-[ ]--LMX1B         |
| 10q21.1  | rs1194708   | chr10 | 54199812  | A/G | I | 2.4×10 <sup>-8</sup>  | 0.910 | [0.881,0.941] | DKK1---[ ]---MBL2         |
| 6p21.1   | rs17336368  | chr6  | 44751668  | A/G | I | 2.8×10 <sup>-8</sup>  | 0.915 | [0.887,0.944] | CDC5L---[ ]--SUPT3H       |
| 6q16.1   | rs112215522 | chr6  | 94913574  | C/T | I | 4.2×10 <sup>-8</sup>  | 1.092 | [1.058,1.127] | EPHA7---[ ]               |

## Quality Statistics for Index SNPs

| assay.name  | is.v2 | is.v3 | is.v4 | gt.rate | hw.p.value | p.date | freq.b | avg.rsqr | min.rsqr | p.batch               | dose.b | qc.mask |
|-------------|-------|-------|-------|---------|------------|--------|--------|----------|----------|-----------------------|--------|---------|
| rs11768577  | FALSE | FALSE | FALSE |         |            |        |        | 0.9852   | 0.9806   | 0.088                 | 0.8466 | v2v3v4  |
| rs6494598   | FALSE | FALSE | FALSE |         |            |        |        | 0.9940   | 0.9852   | 0.56                  | 0.5091 | v2v3v4  |
| rs2476023   | FALSE | FALSE | FALSE |         |            |        |        | 0.9758   | 0.9693   | 0.35                  | 0.7839 | v2v3v4  |
| rs10504499  | FALSE | FALSE | FALSE |         |            |        |        | 0.9935   | 0.9874   | 0.73                  | 0.8819 | v2v3v4  |
| rs72678242  | FALSE | FALSE | FALSE |         |            |        |        | 0.9733   | 0.9611   | 0.77                  | 0.1288 | v2v3v4  |
| rs17479393  | FALSE | FALSE | FALSE |         |            |        |        | 0.9953   | 0.9937   | 0.90                  | 0.2411 | v2v3v4  |
| rs10175706  | FALSE | FALSE | FALSE |         |            |        |        | 0.9950   | 0.9933   | 0.0033                | 0.5972 | v2v3v4  |
| rs6028446   | FALSE | FALSE | FALSE |         |            |        |        | 0.9963   | 0.9937   | 0.0040                | 0.4723 | v2v3v4  |
| rs13035389  | TRUE  | TRUE  | TRUE  | 0.9996  | 0.13       | 0.24   | 0.5491 | 0.9969   | 0.9869   | 0.94                  | 0.5497 | v2v3v4  |
| rs59156997  | FALSE | FALSE | FALSE |         |            |        |        | 0.9391   | 0.9242   | 0.017                 | 0.8341 | v2v3v4  |
| rs4237150   | FALSE | FALSE | FALSE |         |            |        |        | 0.9941   | 0.9862   | 0.45                  | 0.5795 | v2v3v4  |
| rs4674676   | FALSE | FALSE | FALSE |         |            |        |        | 0.9299   | 0.9246   | 0.062                 | 0.8372 | v2v3v4  |
| rs17275866  | FALSE | FALSE | FALSE |         |            |        |        | 0.9909   | 0.9826   | 0.42                  | 0.7043 | v2v3v4  |
| rs55700449  | FALSE | FALSE | FALSE |         |            |        |        | 0.9915   | 0.9881   | 0.28                  | 0.8569 | v2v3v4  |
| rs12509218  | FALSE | FALSE | FALSE |         |            |        |        | 0.9948   | 0.9883   | 0.59                  | 0.1055 | v2v3v4  |
| rs11688237  | FALSE | FALSE | FALSE |         |            |        |        | 0.9968   | 0.9951   | 0.89                  | 0.5061 | v2v3v4  |
| rs7243821   | FALSE | FALSE | FALSE |         |            |        |        | 0.9899   | 0.9838   | 0.19                  | 0.7239 | v2v3v4  |
| rs11650175  | TRUE  | TRUE  | TRUE  | 0.9999  | 0.035      | 0.31   | 0.6516 | 0.9998   | 0.9993   | 0.17                  | 0.6520 | v2v3v4  |
| rs2073323   | FALSE | FALSE | FALSE |         |            |        |        | 0.9987   | 0.9976   | 0.55                  | 0.7521 | v2v3v4  |
| rs4868444   | FALSE | FALSE | FALSE |         |            |        |        | 0.9181   | 0.7897   | 6.3×10 <sup>-5</sup>  | 0.1216 | v2v3v4  |
| rs1766786   | FALSE | FALSE | FALSE |         |            |        |        | 0.9977   | 0.9899   | 0.065                 | 0.1151 | v2v3v4  |
| rs10962767  | FALSE | FALSE | FALSE |         |            |        |        | 0.9780   | 0.9614   | 0.14                  | 0.4331 | v2v3v4  |
| rs73168105  | FALSE | FALSE | FALSE |         |            |        |        | 0.9524   | 0.9249   | 0.0020                | 0.1817 | v2v3v4  |
| rs6740960   | FALSE | FALSE | FALSE |         |            |        |        | 0.8650   | 0.7734   | 3.3×10 <sup>-11</sup> | 0.5062 | v2v3v4  |
| rs7167736   | FALSE | FALSE | FALSE |         |            |        |        | 0.9780   | 0.9547   | 0.24                  | 0.7928 | v2v3v4  |
| rs10078545  | FALSE | FALSE | FALSE |         |            |        |        | 0.9809   | 0.9626   | 0.0081                | 0.6650 | v2v3v4  |
| rs11713363  | TRUE  | TRUE  | TRUE  | 0.9997  | 0.024      | 0.22   | 0.7554 | 0.9914   | 0.9839   | 0.25                  | 0.7571 | v2v3v4  |
| rs199880074 | FALSE | FALSE | FALSE |         |            |        |        | 0.9639   | 0.9506   | 0.39                  | 0.7326 | v2v3v4  |
| rs56347314  | FALSE | FALSE | FALSE |         |            |        |        | 0.9138   | 0.8815   | 0.00037               | 0.4775 | v2v3v4  |
| rs80067372  | FALSE | FALSE | FALSE |         |            |        |        | 0.9622   | 0.9556   | 0.042                 | 0.7290 | v2v3v4  |
| rs12505328  | FALSE | FALSE | FALSE |         |            |        |        | 0.9507   | 0.9307   | 0.068                 | 0.6471 | v2v3v4  |

|             |       |       |       |        |                        |                      |        |  |        |        |         |        |        |
|-------------|-------|-------|-------|--------|------------------------|----------------------|--------|--|--------|--------|---------|--------|--------|
| rs11589479  | FALSE | FALSE | FALSE |        |                        |                      |        |  | 0.9600 | 0.8585 | 0.0070  | 0.8266 | v2v3v4 |
| rs2133593   | FALSE | FALSE | FALSE |        |                        |                      |        |  | 0.9090 | 0.8957 | 0.37    | 0.3556 | v2v3v4 |
| rs12541121  | TRUE  | TRUE  | TRUE  | 0.9985 | 0.096                  | 0.022                | 0.3874 |  | 0.9996 | 0.9985 | 0.0087  | 0.3858 | v2v3v4 |
| rs7161418   | FALSE | FALSE | FALSE |        |                        |                      |        |  | 0.9842 | 0.9468 | 0.047   | 0.2482 | v2v3v4 |
| rs1336149   | TRUE  | TRUE  | FALSE | 0.9895 | $5.4 \times 10^{-105}$ | $4.8 \times 10^{-5}$ | 0.4743 |  | 0.9301 | 0.9151 | 0.023   | 0.4847 | v2v3v4 |
| rs2347498   | FALSE | FALSE | FALSE |        |                        |                      |        |  | 0.9820 | 0.9794 | 0.043   | 0.6220 | v2v3v4 |
| rs11001765  | FALSE | FALSE | FALSE |        |                        |                      |        |  | 0.9925 | 0.9847 | 0.00019 | 0.8570 | v2v3v4 |
| rs12495832  | FALSE | FALSE | FALSE |        |                        |                      |        |  | 0.9254 | 0.8745 | 0.12    | 0.8871 | v2v3v4 |
| rs141753469 | FALSE | FALSE | FALSE |        |                        |                      |        |  | 0.9489 | 0.8948 | 0.35    | 0.2086 | v2v3v4 |
| rs145365164 | FALSE | FALSE | FALSE |        |                        |                      |        |  | 0.9733 | 0.9707 | 0.65    | 0.8073 | v2v3v4 |
| rs4958741   | FALSE | FALSE | FALSE |        |                        |                      |        |  | 0.9973 | 0.9965 | 0.51    | 0.8134 | v2v3v4 |
| rs62578082  | FALSE | FALSE | FALSE |        |                        |                      |        |  | 0.9582 | 0.9340 | 0.0042  | 0.1134 | v2v3v4 |
| rs1194708   | FALSE | FALSE | FALSE |        |                        |                      |        |  | 0.9878 | 0.9859 | 0.019   | 0.7586 | v2v3v4 |
| rs17336368  | FALSE | FALSE | FALSE |        |                        |                      |        |  | 0.9618 | 0.9547 | 0.44    | 0.7096 | v2v3v4 |
| rs112215522 | FALSE | FALSE | FALSE |        |                        |                      |        |  | 0.9605 | 0.9503 | 0.14    | 0.2849 | v2v3v4 |

## SNP Statistics in the GWAS Sample

| assay.name  | AA.0 | AB.0 | BB.0 | im.num.0 | dose.b.0 | AA.1  | AB.1  | BB.1  | im.num.1 | dose.b.1 |
|-------------|------|------|------|----------|----------|-------|-------|-------|----------|----------|
| rs11768577  |      |      |      | 13457    | 0.8166   |       |       |       | 58032    | 0.8560   |
| rs6494598   |      |      |      | 13457    | 0.4676   |       |       |       | 58032    | 0.5169   |
| rs2476023   |      |      |      | 13457    | 0.8114   |       |       |       | 58032    | 0.7749   |
| rs10504499  |      |      |      | 13457    | 0.8597   |       |       |       | 58032    | 0.8872   |
| rs72678242  |      |      |      | 13457    | 0.1528   |       |       |       | 58032    | 0.1249   |
| rs17479393  |      |      |      | 13457    | 0.2687   |       |       |       | 58032    | 0.2355   |
| rs10175706  |      |      |      | 13457    | 0.6327   |       |       |       | 58032    | 0.5951   |
| rs6028446   |      |      |      | 13457    | 0.5048   |       |       |       | 58032    | 0.4691   |
| rs13035389  | 3034 | 6777 | 3640 | 13457    | 0.5226   | 11476 | 28756 | 17782 | 58032    | 0.5544   |
| rs59156997  |      |      |      | 13457    | 0.8531   |       |       |       | 58032    | 0.8305   |
| rs4237150   |      |      |      | 13457    | 0.6059   |       |       |       | 58032    | 0.5752   |
| rs4674676   |      |      |      | 13457    | 0.8538   |       |       |       | 58032    | 0.8330   |
| rs17275866  |      |      |      | 13457    | 0.7251   |       |       |       | 58032    | 0.6984   |
| rs55700449  |      |      |      | 13457    | 0.8681   |       |       |       | 58032    | 0.8495   |
| rs12509218  |      |      |      | 13457    | 0.1193   |       |       |       | 58032    | 0.1016   |
| rs11688237  |      |      |      | 13457    | 0.5253   |       |       |       | 58032    | 0.4994   |
| rs7243821   |      |      |      | 13457    | 0.7060   |       |       |       | 58032    | 0.7295   |
| rs11650175  | 1429 | 5901 | 6125 | 13457    | 0.6743   | 7147  | 26451 | 24428 | 58032    | 0.6489   |
| rs2073323   |      |      |      | 13457    | 0.7339   |       |       |       | 58032    | 0.7571   |
| rs4868444   |      |      |      | 13457    | 0.1087   |       |       |       | 58032    | 0.1247   |
| rs1766786   |      |      |      | 13457    | 0.1259   |       |       |       | 58032    | 0.1099   |
| rs10962767  |      |      |      | 13457    | 0.4558   |       |       |       | 58032    | 0.4303   |
| rs73168105  |      |      |      | 13457    | 0.1667   |       |       |       | 58032    | 0.1868   |
| rs6740960   |      |      |      | 13457    | 0.4927   |       |       |       | 58032    | 0.5150   |
| rs7167736   |      |      |      | 13457    | 0.8082   |       |       |       | 58032    | 0.7881   |
| rs10078545  |      |      |      | 13457    | 0.6457   |       |       |       | 58032    | 0.6691   |
| rs11713363  | 714  | 4725 | 8015 | 13457    | 0.7725   | 3723  | 21530 | 32755 | 58032    | 0.7516   |
| rs199880074 |      |      |      | 13457    | 0.7479   |       |       |       | 58032    | 0.7274   |
| rs56347314  |      |      |      | 13457    | 0.4555   |       |       |       | 58032    | 0.4788   |
| rs80067372  |      |      |      | 13457    | 0.7097   |       |       |       | 58032    | 0.7318   |
| rs12505328  |      |      |      | 13457    | 0.6321   |       |       |       | 58032    | 0.6540   |
| rs11589479  |      |      |      | 13457    | 0.8149   |       |       |       | 58032    | 0.8317   |
| rs2133593   |      |      |      | 13457    | 0.3736   |       |       |       | 58032    | 0.3532   |
| rs12541121  | 5339 | 6297 | 1816 | 13457    | 0.3690   | 21521 | 27769 | 8710  | 58032    | 0.3895   |
| rs7161418   |      |      |      | 13457    | 0.2320   |       |       |       | 58032    | 0.2500   |
| rs1336149   | 3829 | 6161 | 2744 | 13457    | 0.4663   | 15421 | 26443 | 13046 | 58032    | 0.4874   |
| rs2347498   |      |      |      | 13457    | 0.6422   |       |       |       | 58032    | 0.6223   |
| rs11001765  |      |      |      | 13457    | 0.8737   |       |       |       | 58032    | 0.8581   |
| rs12495832  |      |      |      | 13457    | 0.8978   |       |       |       | 58032    | 0.8852   |
| rs141753469 |      |      |      | 13457    | 0.1954   |       |       |       | 58032    | 0.2113   |
| rs145365164 |      |      |      | 13457    | 0.7953   |       |       |       | 58032    | 0.8106   |
| rs4958741   |      |      |      | 13457    | 0.8009   |       |       |       | 58032    | 0.8166   |
| rs62578082  |      |      |      | 13457    | 0.1038   |       |       |       | 58032    | 0.1160   |
| rs1194708   |      |      |      | 13457    | 0.7767   |       |       |       | 58032    | 0.7597   |
| rs17336368  |      |      |      | 13457    | 0.7223   |       |       |       | 58032    | 0.7054   |
| rs112215522 |      |      |      | 13457    | 0.2700   |       |       |       | 58032    | 0.2865   |

## Annotations from NHGRI GWAS Catalog

The following table shows, for each index SNP, all entries in the NHGRI GWAS Catalog that are within 500kb and in at least moderate linkage disequilibrium ( $r^2 > 0.5$ ).

| region  | position  | our.name   | our.pval              | dist   | rsqr  | assay.name | pvalue                | pubmed.id | trait                                                 | genes         |
|---------|-----------|------------|-----------------------|--------|-------|------------|-----------------------|-----------|-------------------------------------------------------|---------------|
| 1q31.3  | 197351039 | rs2476023  | $9.7 \times 10^{-39}$ | -25131 | 0.841 | rs2786098  | $2.0 \times 10^{-13}$ | 20032318  | Asthma                                                | DENND1B, CRB1 |
| 9p24.2  | 4290085   | rs4237150  | $5.6 \times 10^{-19}$ | -2619  | 0.671 | rs7041847  | $2.0 \times 10^{-14}$ | 22158537  | Type 2 diabetes                                       | GLIS3         |
| 9p24.2  | 4290085   | rs4237150  | $5.6 \times 10^{-19}$ | -1035  | 0.708 | rs7034200  | $7.0 \times 10^{-7}$  | 22581228  | Fasting glucose-related traits (interaction with BMI) | GLIS3         |
| 9p24.2  | 4290085   | rs4237150  | $5.6 \times 10^{-19}$ | -1035  | 0.708 | rs7034200  | $1.0 \times 10^{-13}$ | 20081858  | Fasting glucose-related traits                        | GLIS3         |
| 9p24.2  | 4290085   | rs4237150  | $5.6 \times 10^{-19}$ | 1662   | 0.677 | rs7020673  | $5.0 \times 10^{-12}$ | 19430480  | Type 1 diabetes                                       | GLIS3         |
| 9p24.2  | 4290085   | rs4237150  | $5.6 \times 10^{-19}$ | 1998   | 0.973 | rs10758593 | $3.0 \times 10^{-6}$  | 18840781  | Type 1 diabetes                                       | GLIS3         |
| 9p24.2  | 4290085   | rs4237150  | $5.6 \times 10^{-19}$ | 3065   | 0.681 | rs10814916 | $6.0 \times 10^{-12}$ | 22961080  | Type 2 diabetes                                       | GLIS3         |
| 19q12   | 30982165  | rs55700449 | $2.8 \times 10^{-15}$ | 8535   | 0.604 | rs3786800  | $3.0 \times 10^{-12}$ | 23049088  | Myopia (pathological)                                 | ZNF536        |
| 17q24.3 | 69123106  | rs56347314 | $5.4 \times 10^{-12}$ | -14353 | 0.687 | rs1859962  | $3.0 \times 10^{-11}$ | 21743057  | Prostate cancer                                       | Intergenic    |
| 17q24.3 | 69123106  | rs56347314 | $5.4 \times 10^{-12}$ | -14353 | 0.687 | rs1859962  | $2.0 \times 10^{-16}$ | 19767753  | Prostate cancer                                       | Intergenic    |
| 17q24.3 | 69123106  | rs56347314 | $5.4 \times 10^{-12}$ | -14353 | 0.687 | rs1859962  | $1.0 \times 10^{-6}$  | 18264097  | Prostate cancer                                       | Intergenic    |
| 17q24.3 | 69123106  | rs56347314 | $5.4 \times 10^{-12}$ | -14353 | 0.687 | rs1859962  | $3.0 \times 10^{-10}$ | 17603485  | Prostate cancer                                       | Intergenic    |

|         |           |            |                       |       |       |            |                       |          |                                     |                            |
|---------|-----------|------------|-----------------------|-------|-------|------------|-----------------------|----------|-------------------------------------|----------------------------|
| 17p13.1 | 7452752   | rs80067372 | $1.2 \times 10^{-11}$ | 38425 | 0.541 | rs4227     | $4.0 \times 10^{-10}$ | 22197929 | IgA nephropathy                     | MPDU1                      |
| 17p13.1 | 7452752   | rs80067372 | $1.2 \times 10^{-11}$ | 69163 | 0.656 | rs12150660 | $6.0 \times 10^{-30}$ | 22829776 | Sex hormone-binding globulin levels | SHBG                       |
| 17p13.1 | 7452752   | rs80067372 | $1.2 \times 10^{-11}$ | 69163 | 0.656 | rs12150660 | $1.0 \times 10^{-41}$ | 21998597 | Testosterone levels                 | SHBG<br>TBL1XR1,<br>KCNMB2 |
| 3q26.32 | 177301992 | rs2133593  | $6.6 \times 10^{-11}$ | 2306  | 0.792 | rs7620503  | $1.0 \times 10^{-8}$  | 23291589 | Corneal structure                   | KCNMB2                     |
| 6p21.1  | 44751668  | rs17336368 | $2.8 \times 10^{-8}$  | 26023 | 0.743 | rs10948172 | $6.0 \times 10^{-7}$  | 22763110 | Osteoarthritis                      | SUPT3H, CDC5L              |

## Replication of GWAS Catalog Results

The following table shows, for each GWAS Catalog result for similar traits, our association test result for our best available proxy (distance < 100kb,  $r^2 > 0.8$ ).

*no relevant GWAS catalog terms were available*

## Nearby Nonsynonymous SNPs

| region | position  | our.name   | our.pval              | dist   | rsqr  | assay.name | gene     | aa.chg |
|--------|-----------|------------|-----------------------|--------|-------|------------|----------|--------|
| 1q22   | 155033308 | rs11589479 | $4.7 \times 10^{-11}$ | -6366  | 0.589 | rs6427128  | ADAM15   | K191T  |
| 1q23.1 | 156939175 | rs1336149  | $1.5 \times 10^{-9}$  | -32094 | 0.744 | rs945508   | ARHGEF11 | H1467R |
| 9q33.3 | 129277041 | rs62578082 | $1.4 \times 10^{-8}$  | -11135 | 0.503 | rs3841410  | MVB12B   | ?442?  |

## Nearby Expression QTLs

| region  | position  | our.name   | our.pval              | dist    | rsqr  | assay.name | eqtl.dist | eqtl.gene | eqtl.pval             | eqtl.rsqr | tissue                  | pubmed.id |
|---------|-----------|------------|-----------------------|---------|-------|------------|-----------|-----------|-----------------------|-----------|-------------------------|-----------|
| 3q25.32 | 157828322 | rs11713363 | $2.3 \times 10^{-12}$ | -160965 | 0.623 | rs4362677  | 160504    | RSRC1     | $3.5 \times 10^{-10}$ | 0.029     | Monocyte                | 20502693  |
| 17p13.1 | 7452752   | rs80067372 | $1.2 \times 10^{-11}$ | -1642   | 0.911 | rs34790908 | 9881      | TNFSF12   | 0.00012               | 0.052     | B-Cell                  | 22446964  |
| 17p13.1 | 7452752   | rs80067372 | $1.2 \times 10^{-11}$ | -1642   | 0.911 | rs34790908 | 9881      | TNFSF12   | $1.8 \times 10^{-27}$ | 0.344     | Monocyte                | 22446964  |
| 17p13.1 | 7452752   | rs80067372 | $1.2 \times 10^{-11}$ | 2784    | 0.643 | rs4511593  | 0         | TNFSF12   | $1.5 \times 10^{-73}$ | 0.205     | Monocyte                | 20502693  |
| 17p13.1 | 7452752   | rs80067372 | $1.2 \times 10^{-11}$ | 2784    | 0.643 | rs4511593  | 3161      | TNFSF13   | 0.00026               | 0.168     | Fibroblast              | 19644074  |
| 17p13.1 | 7452752   | rs80067372 | $1.2 \times 10^{-11}$ | 15464   | 0.530 | rs4968212  | 23404     | SOX15     | $4.3 \times 10^{-6}$  | 0.073     | Monocyte                | 22446964  |
| 17p13.1 | 7452752   | rs80067372 | $1.2 \times 10^{-11}$ | 15464   | 0.530 | rs4968212  | 297085    | CYB5D1    | 0.00014               | 0.051     | B-Cell                  | 22446964  |
| 17p13.1 | 7452752   | rs80067372 | $1.2 \times 10^{-11}$ | 24725   | 0.516 | rs4968214  | 930844    | MED31     | $9.3 \times 10^{-5}$  | 0.190     | T-cell                  | 19644074  |
| 17p13.1 | 7452752   | rs80067372 | $1.2 \times 10^{-11}$ | 38425   | 0.541 | rs4227     | 38609     | SAT2      | $2.2 \times 10^{-5}$  | 0.062     | Monocyte                | 22446964  |
| 5q33.2  | 153868262 | rs4958741  | $1.3 \times 10^{-8}$  | 5298    | 0.504 | rs283438   | 364546    | CNOT8     | 0.00014               | 0.181     | Lymphoblastoid          | 19644074  |
| 6p21.1  | 44751668  | rs17336368 | $2.8 \times 10^{-8}$  | 26023   | 0.743 | rs10948172 | 18995     | SUPT3H    | $4.8 \times 10^{-8}$  | 0.101     | B-Cell                  | 22446964  |
| 6p21.1  | 44751668  | rs17336368 | $2.8 \times 10^{-8}$  | 173625  | 0.608 | rs12210292 | -723741   | SLC29A1   | 0.00016               | 0.050     | Monocyte                | 22446964  |
| 6p21.1  | 44751668  | rs17336368 | $2.8 \times 10^{-8}$  | 300292  | 0.720 | rs17423748 | -147514   | SUPT3H    | $2.3 \times 10^{-9}$  | 0.224     | Brain Frontal<br>Cortex | 20485568  |

## Nearby Clinical Variants

*no hits were found for clinical variants*

## Regional Association Plots

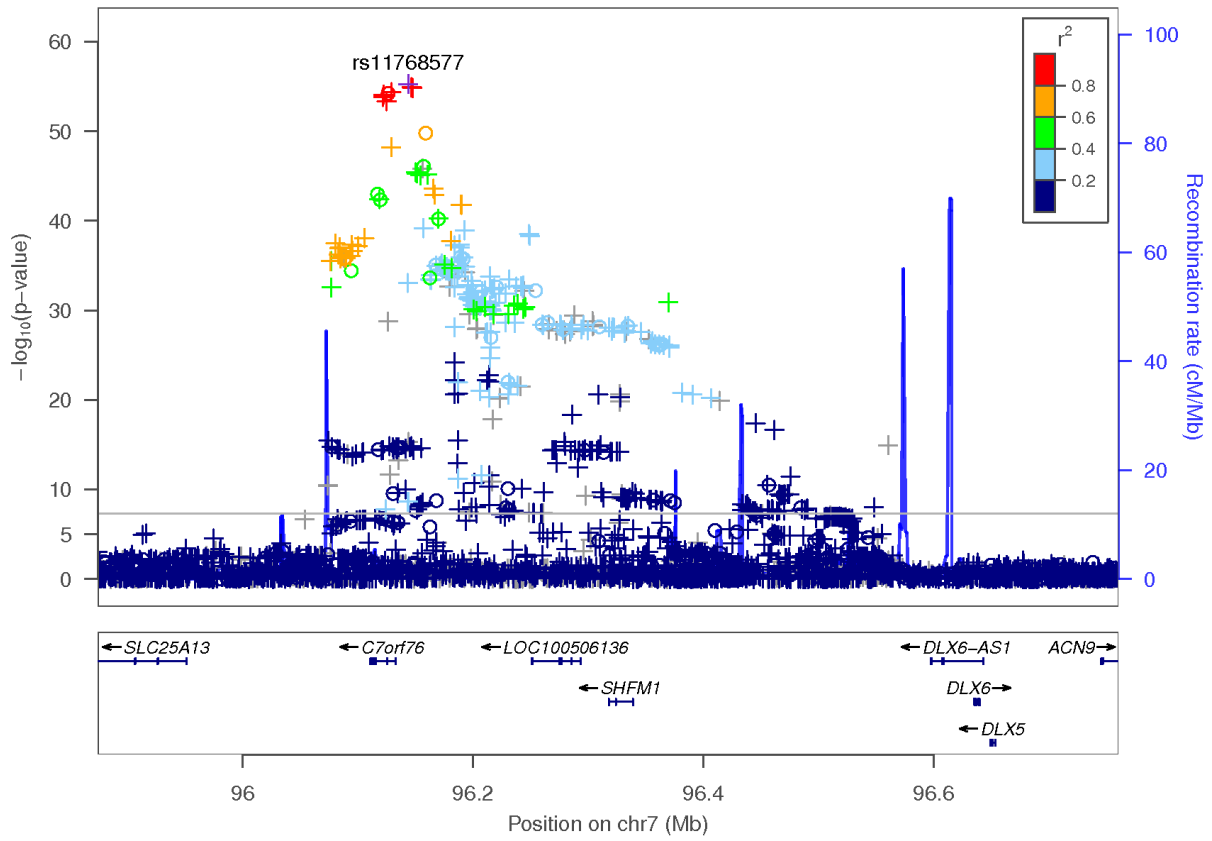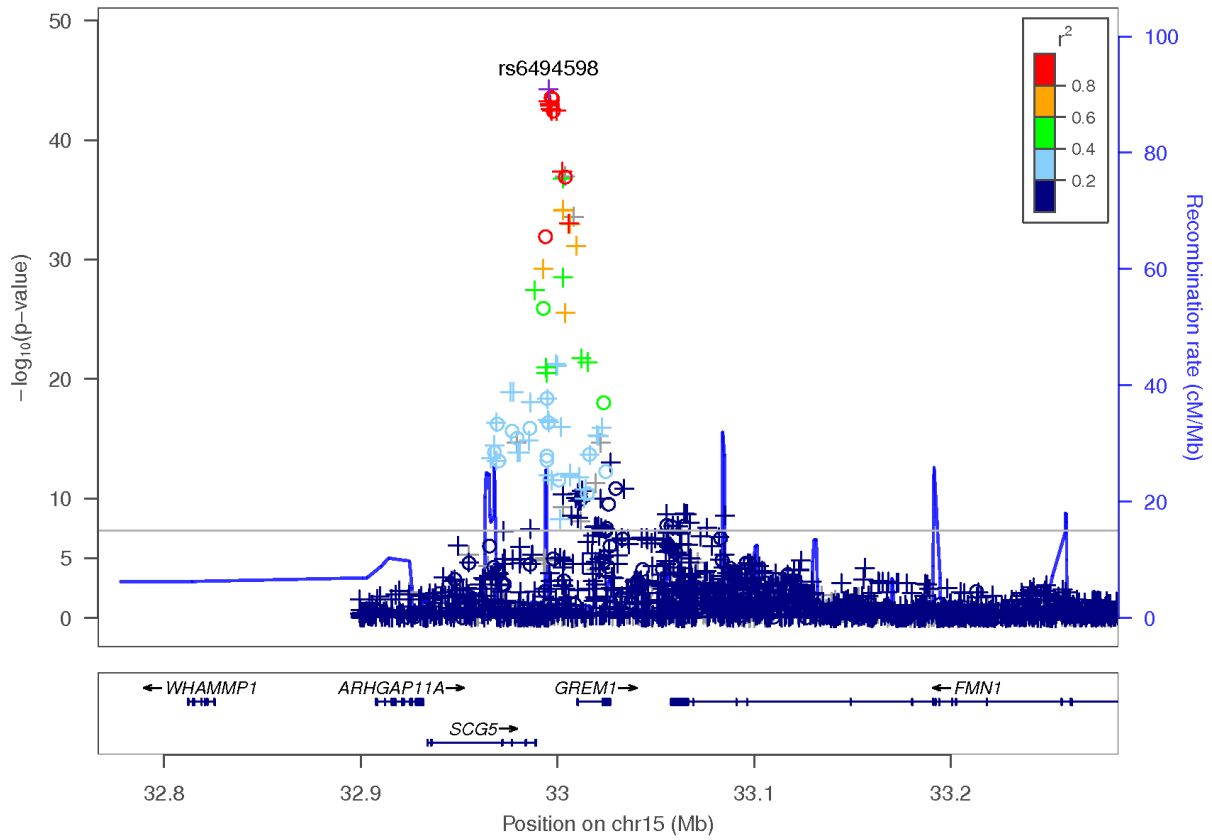

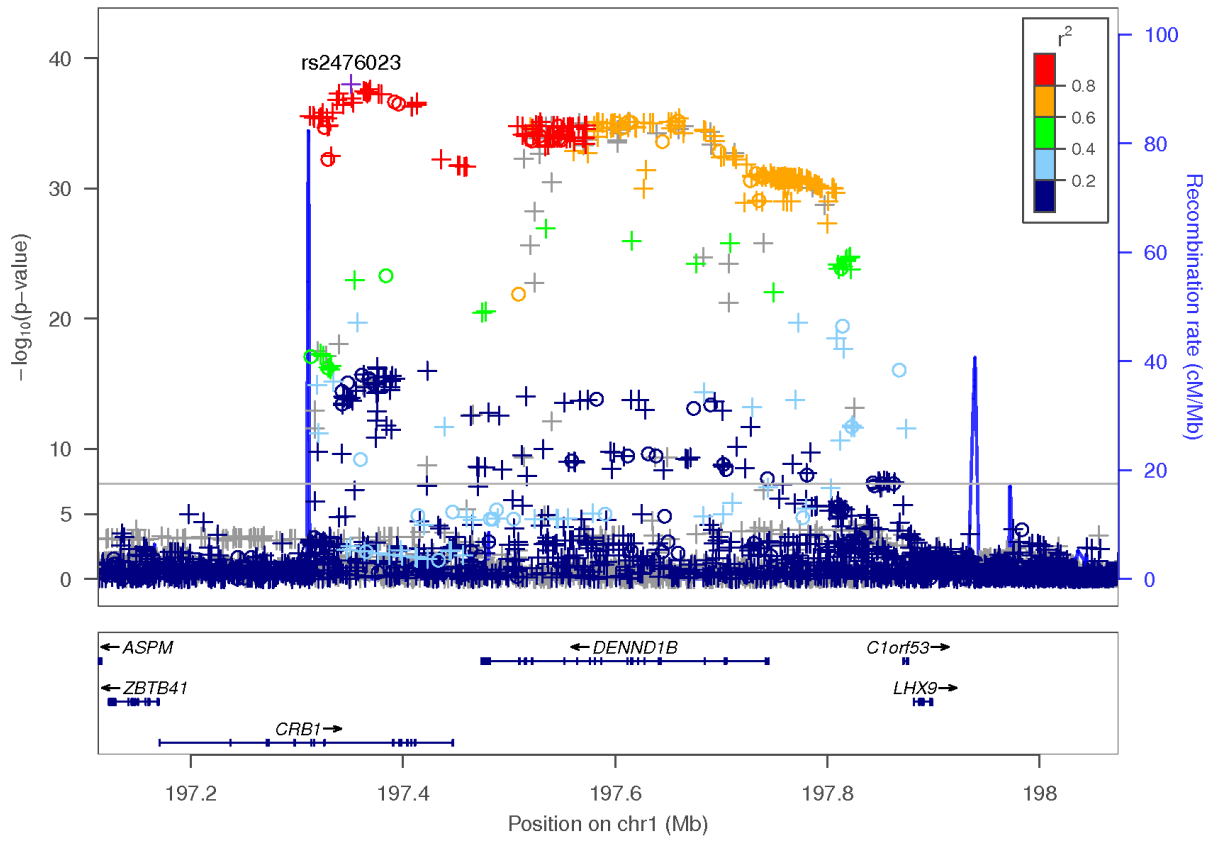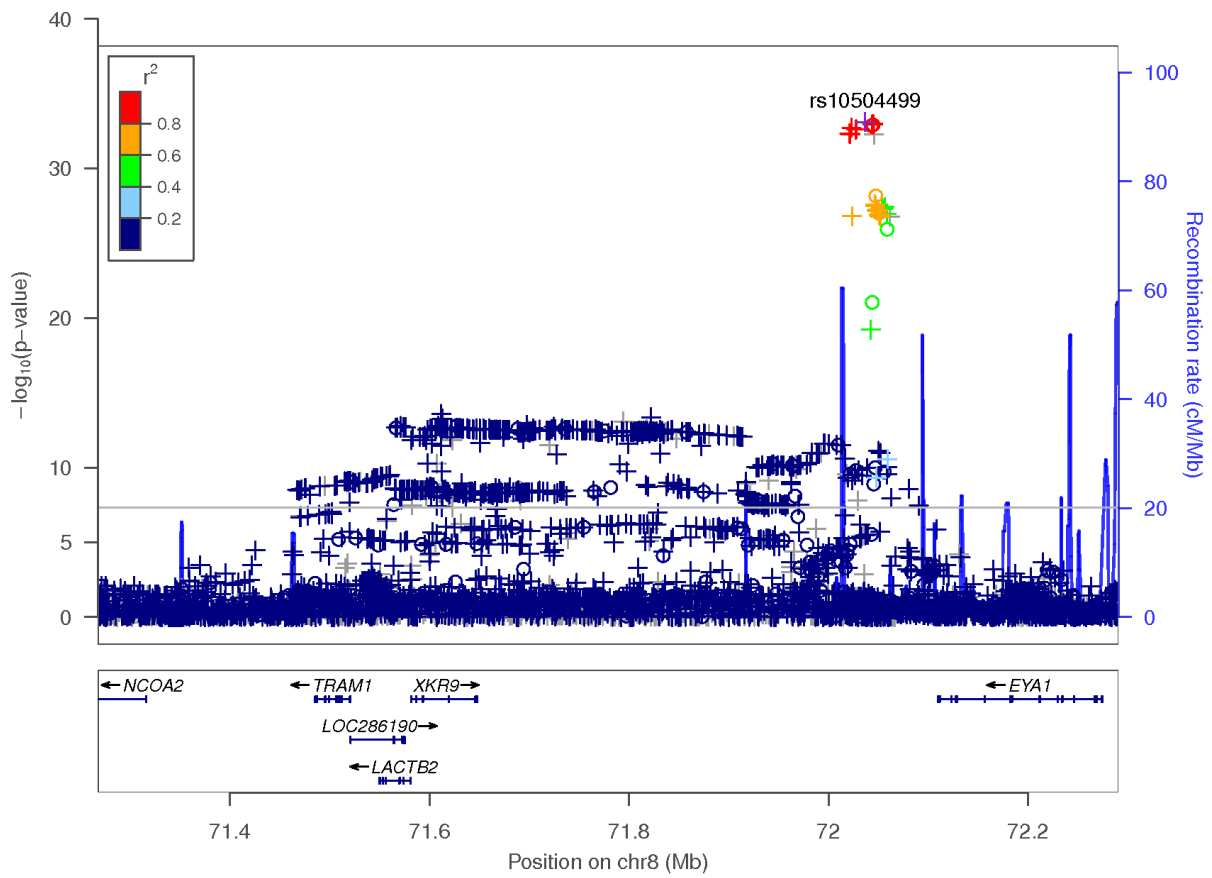

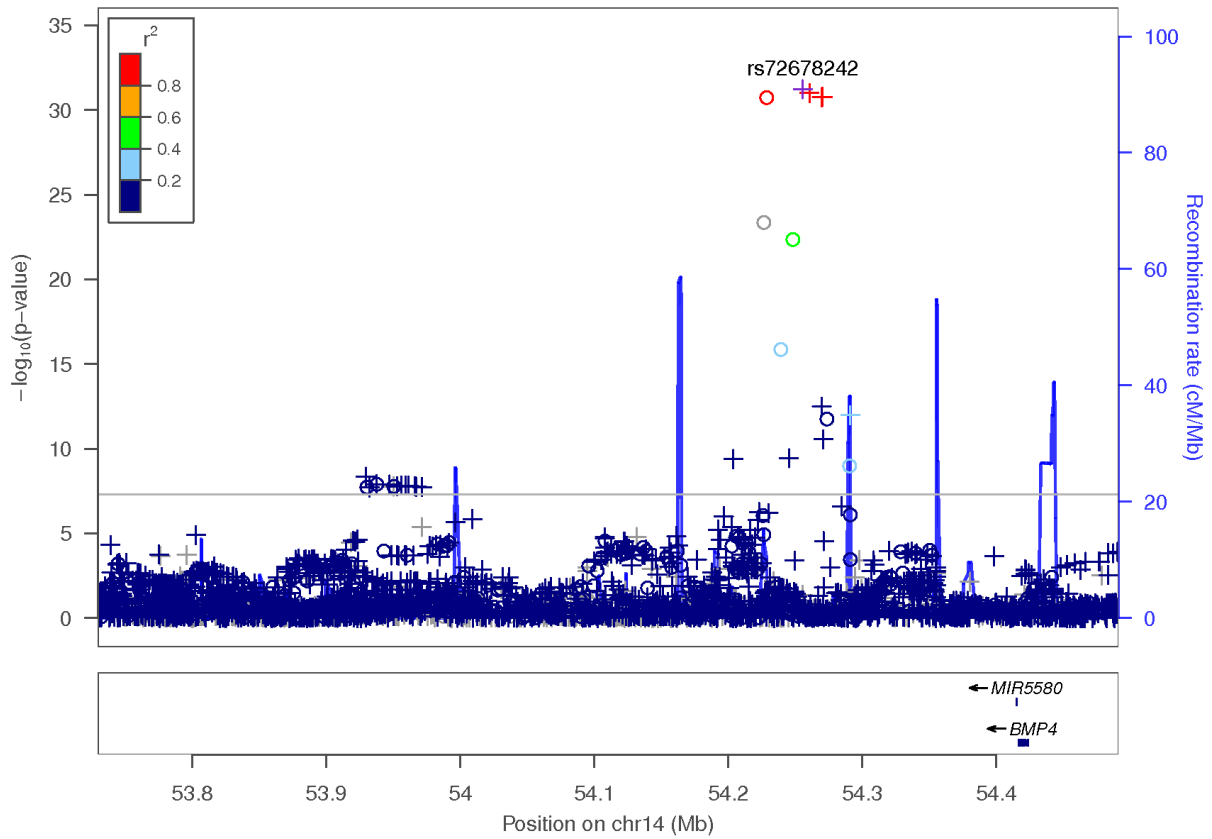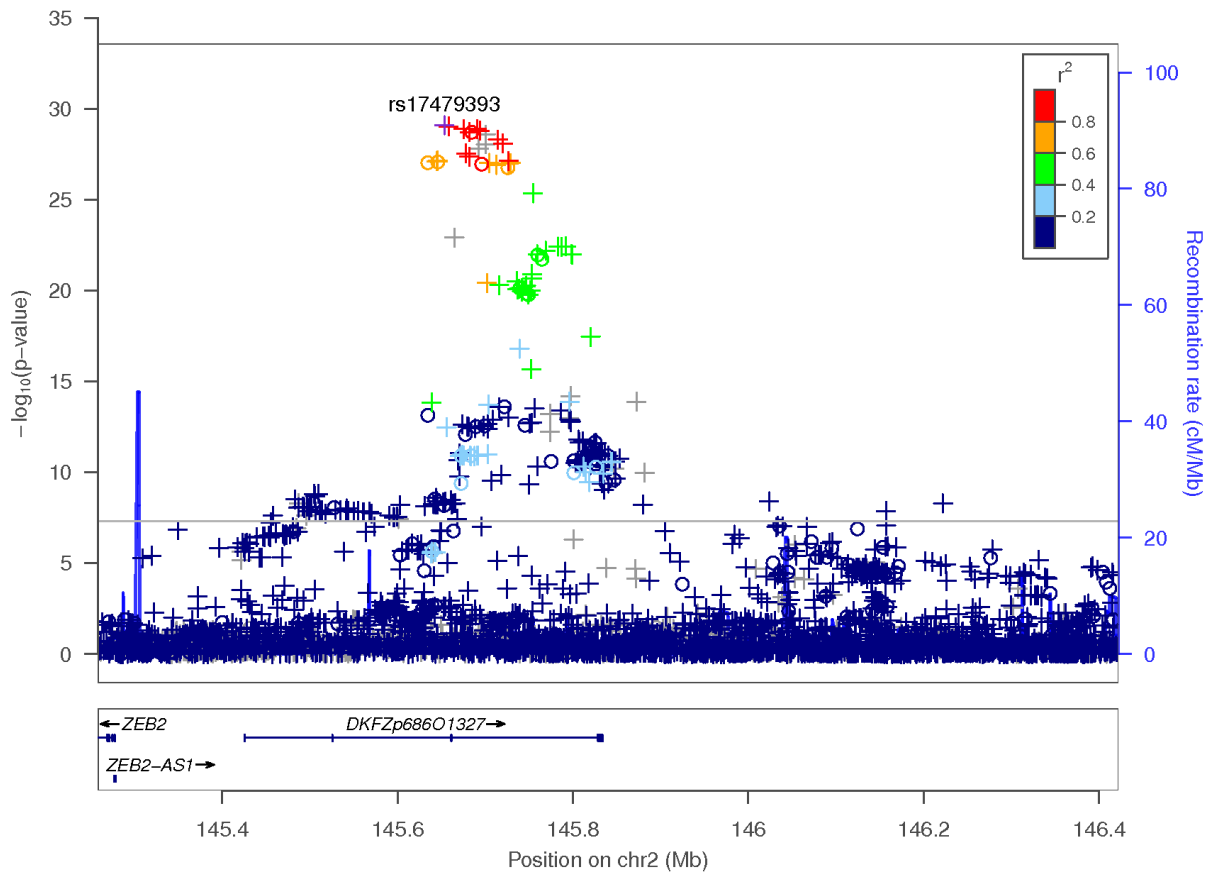



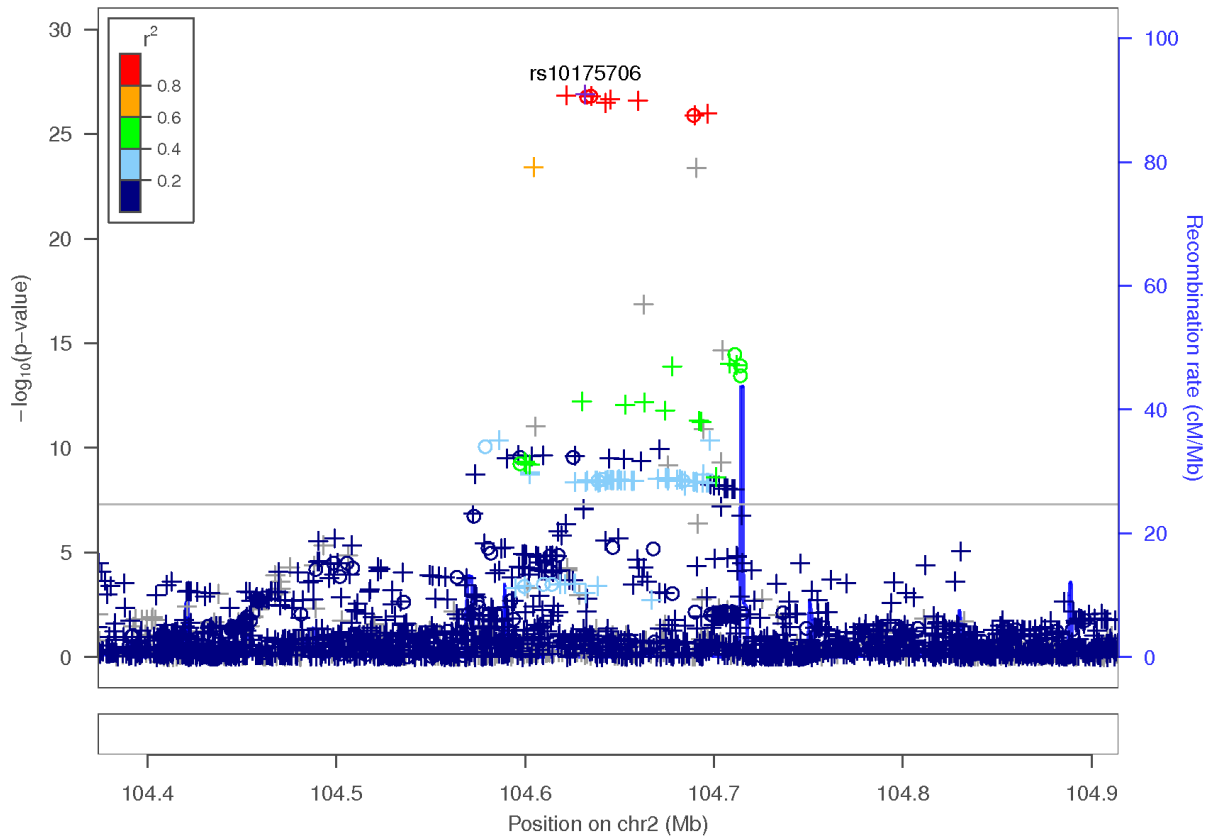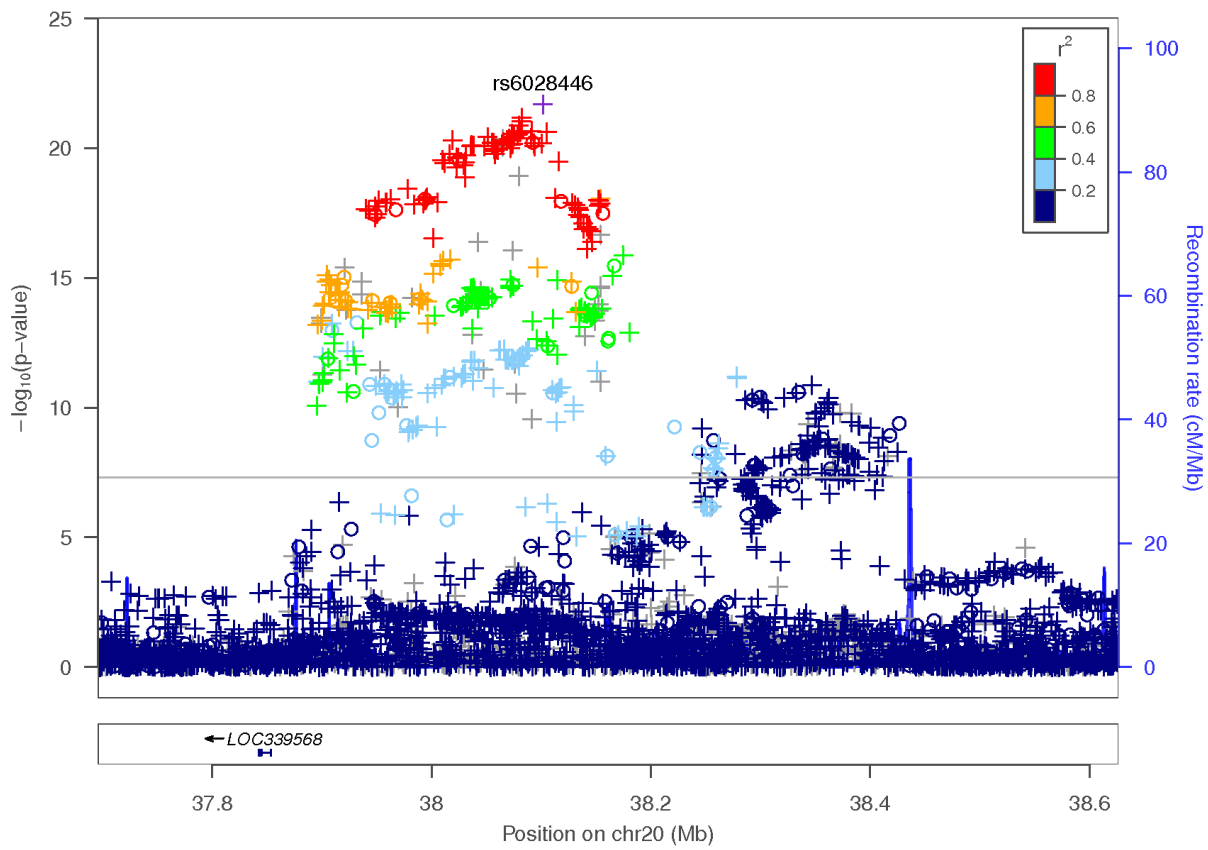

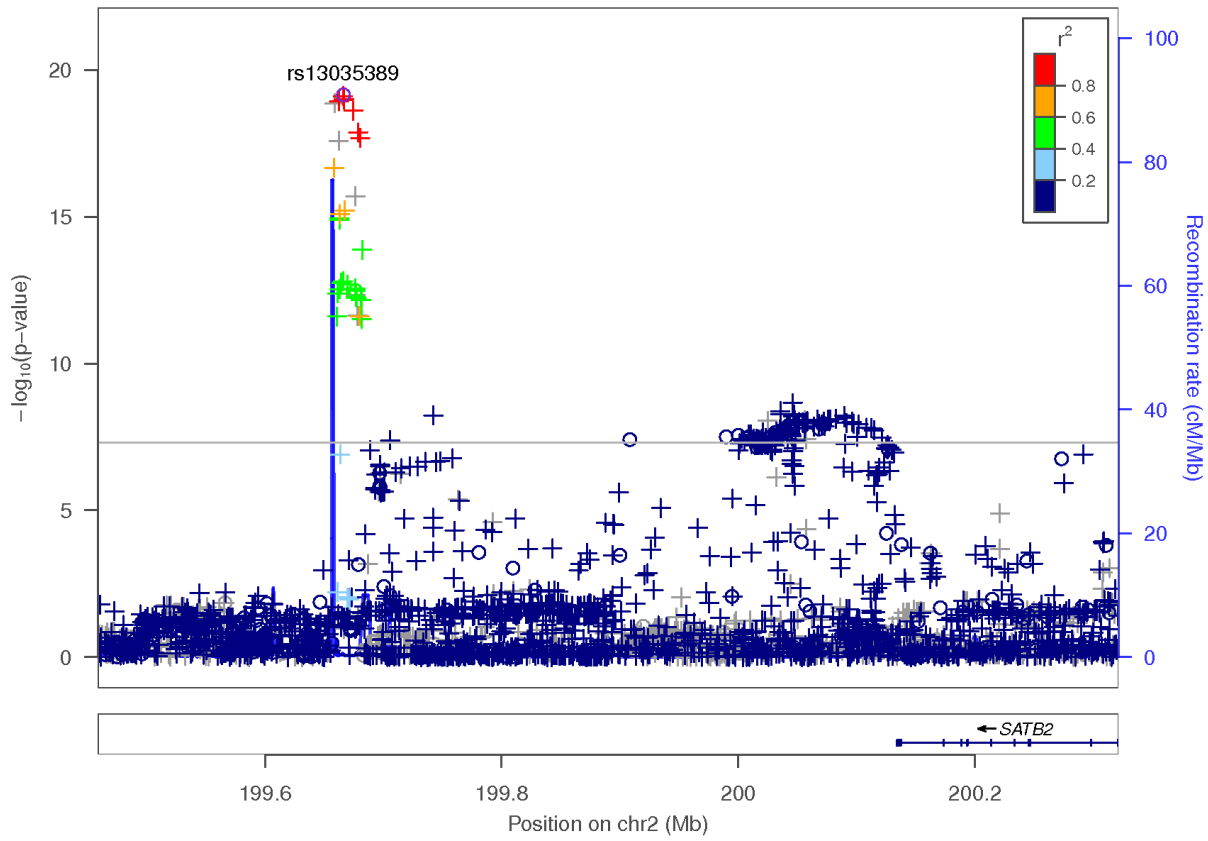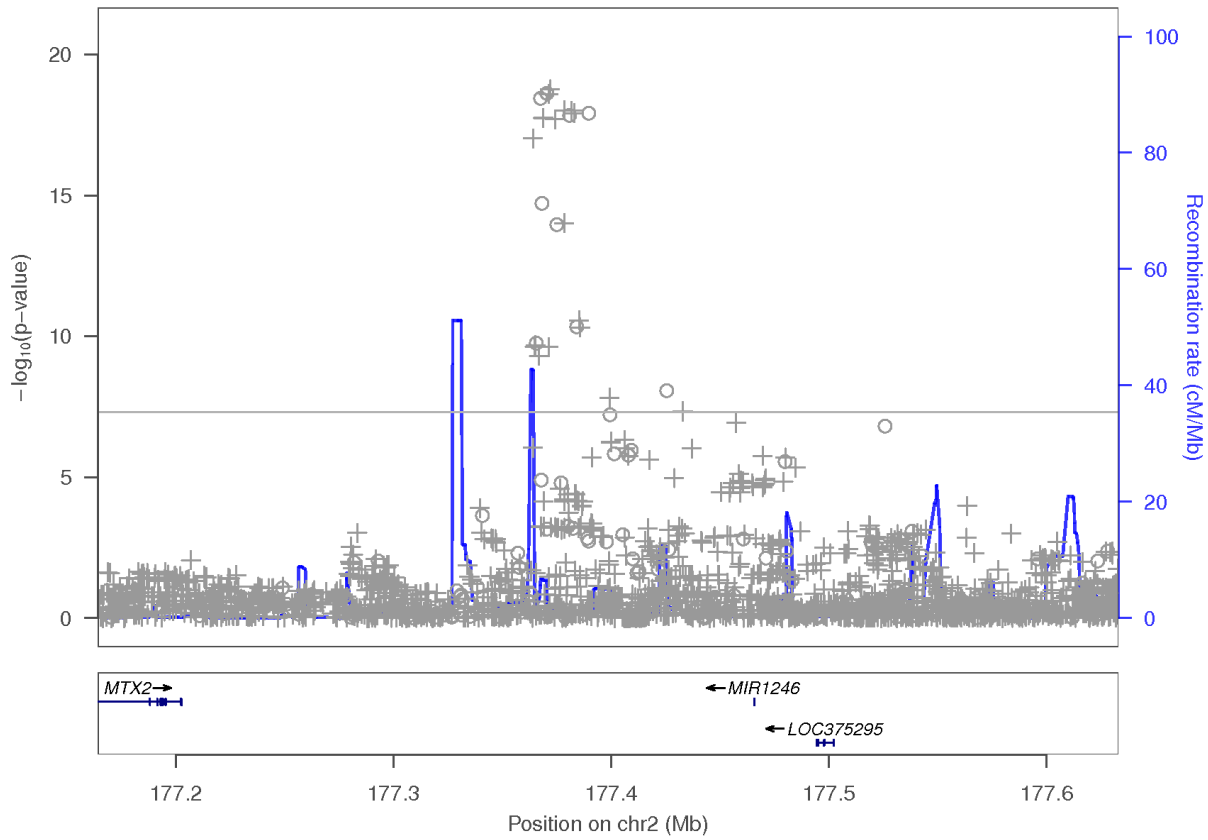

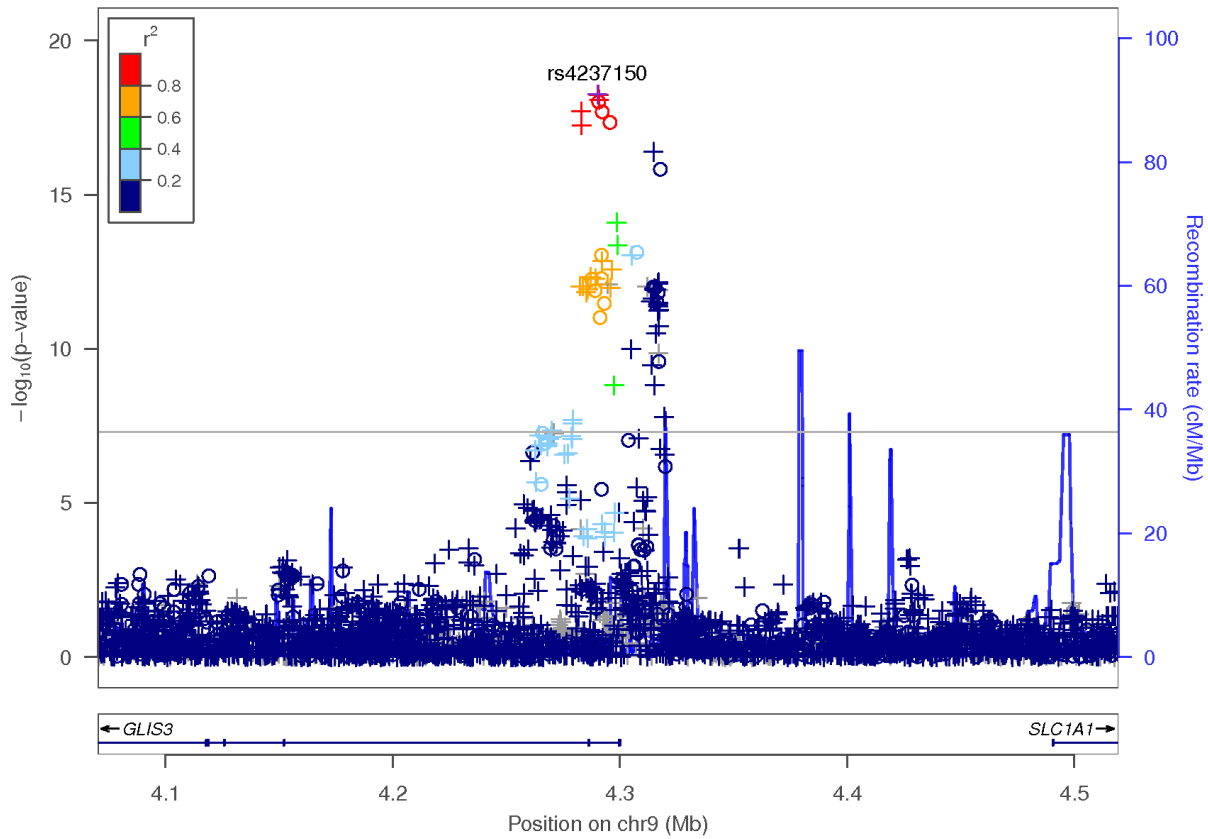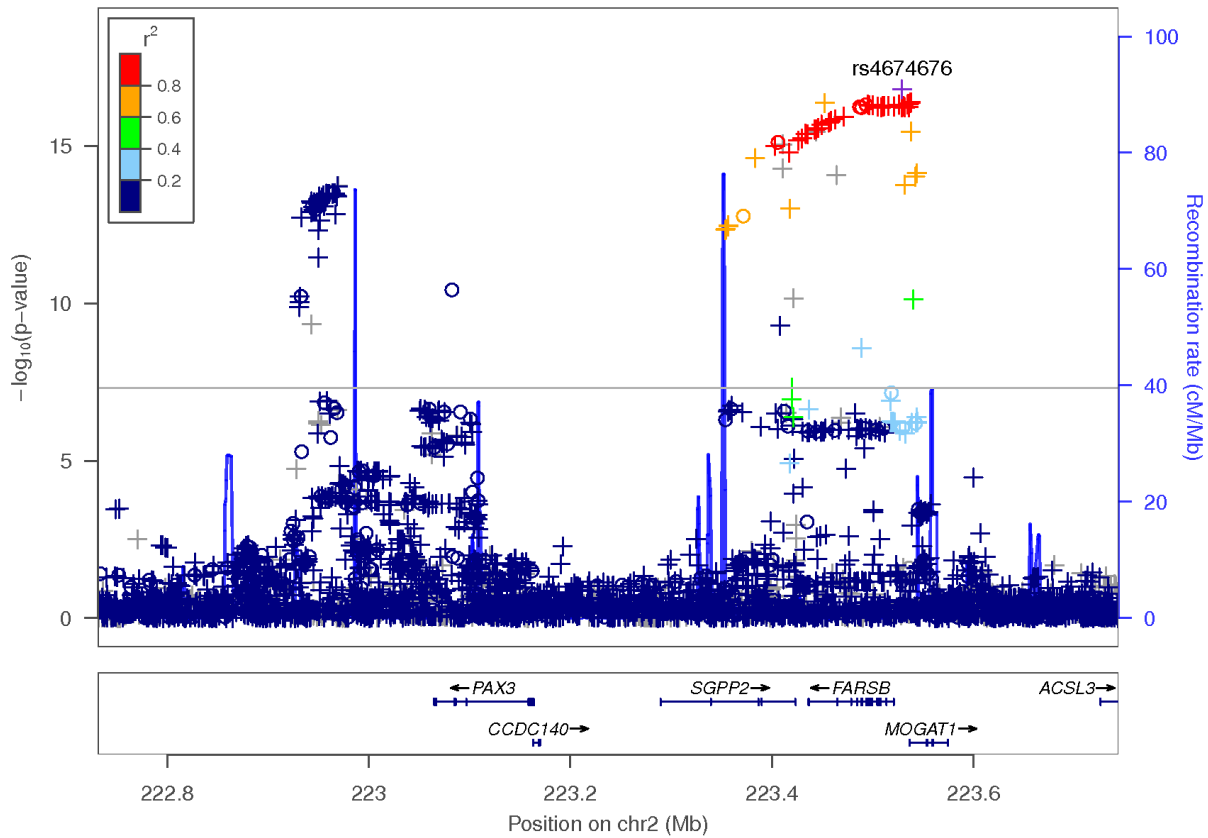

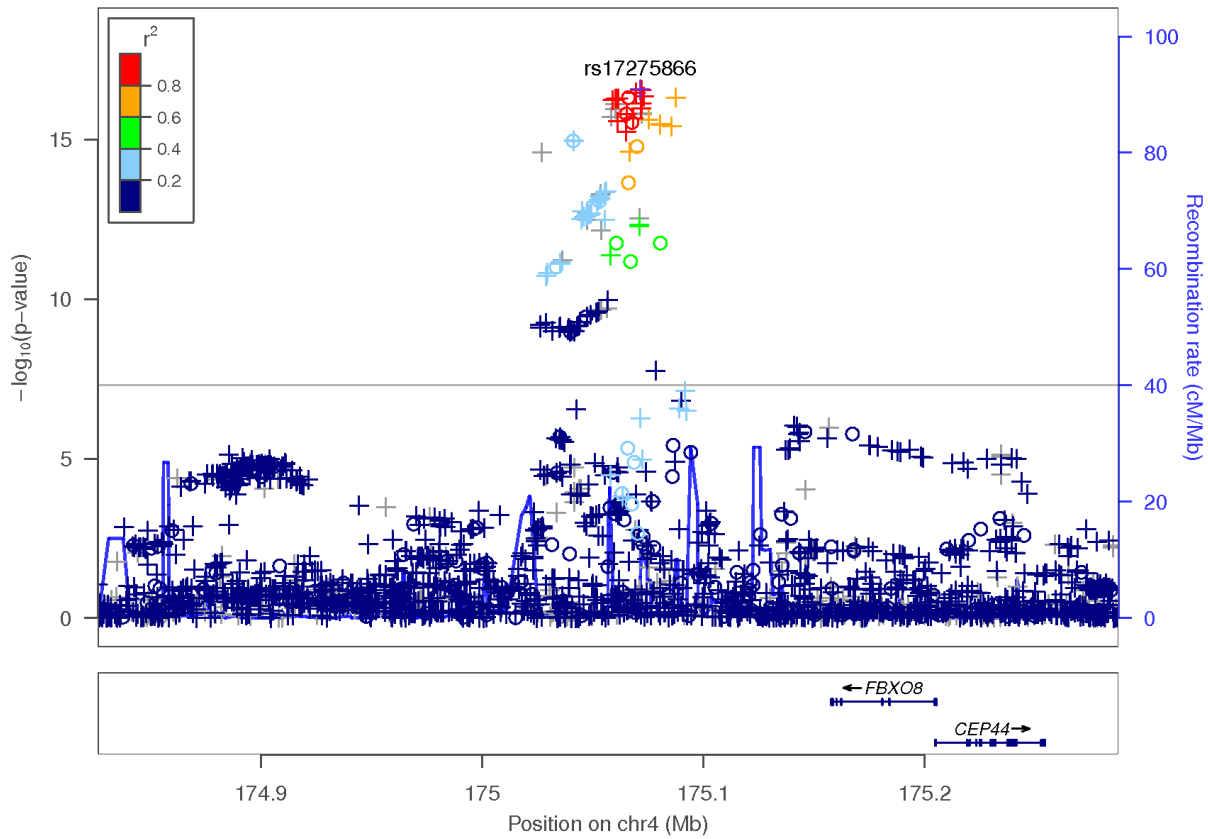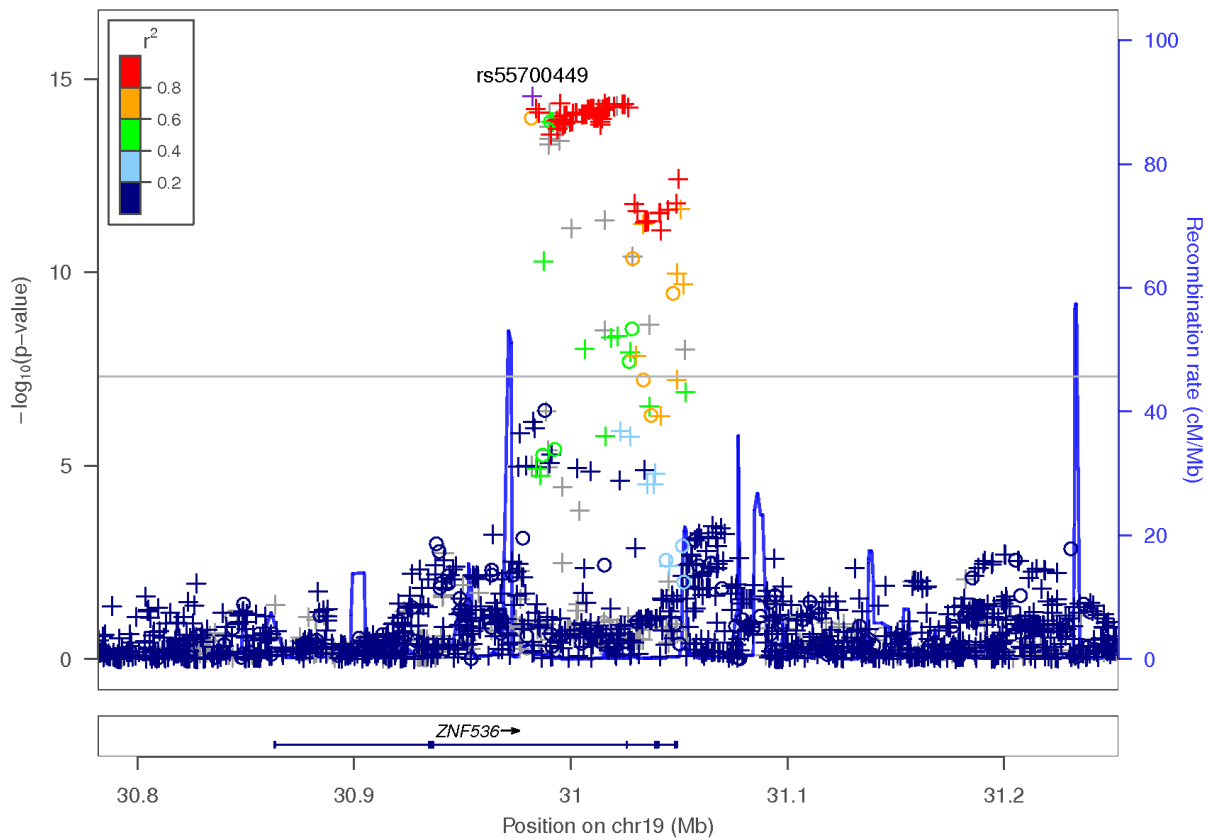

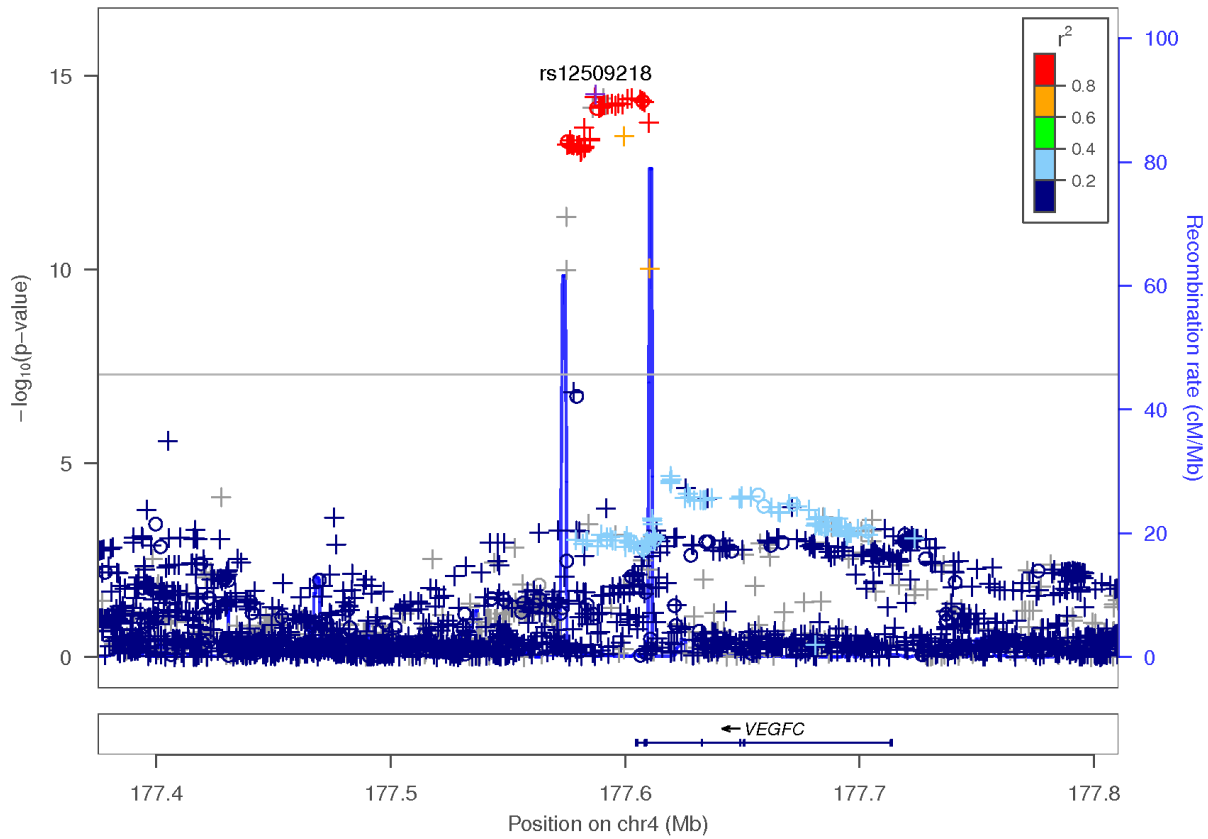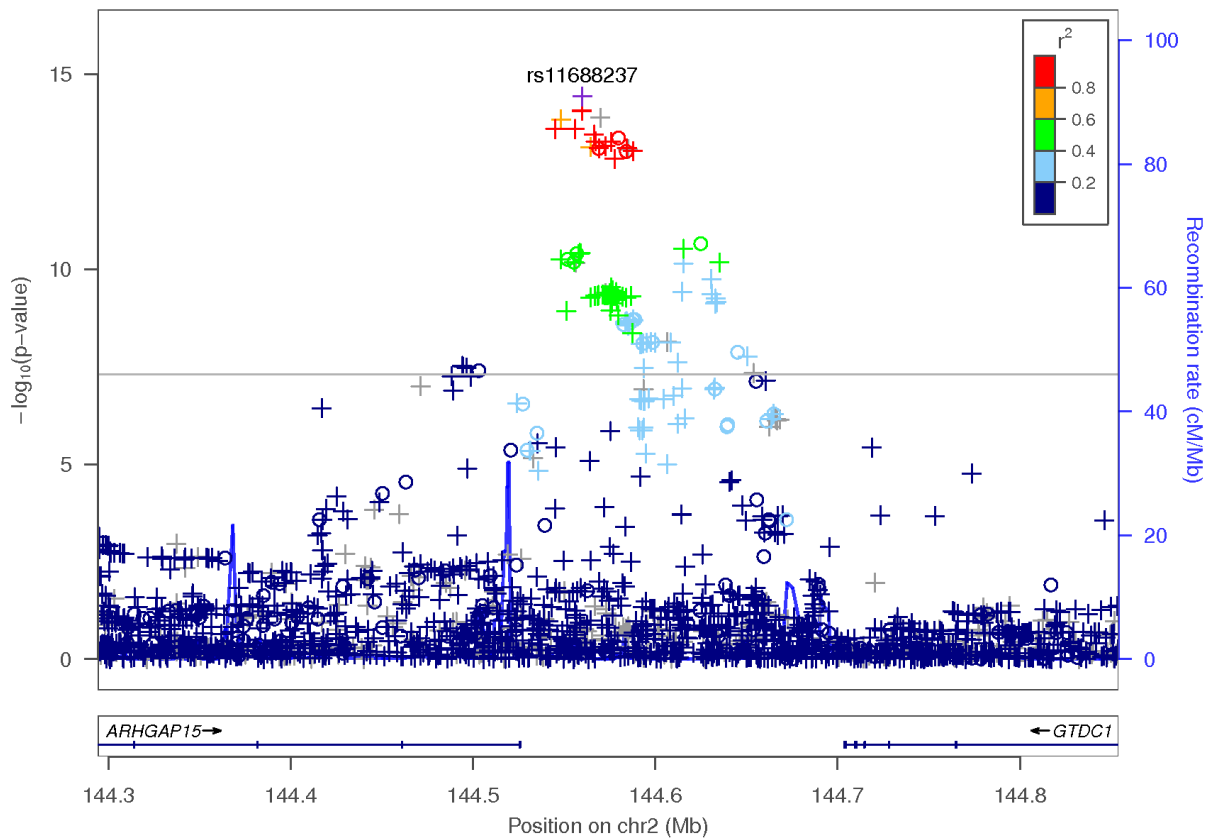

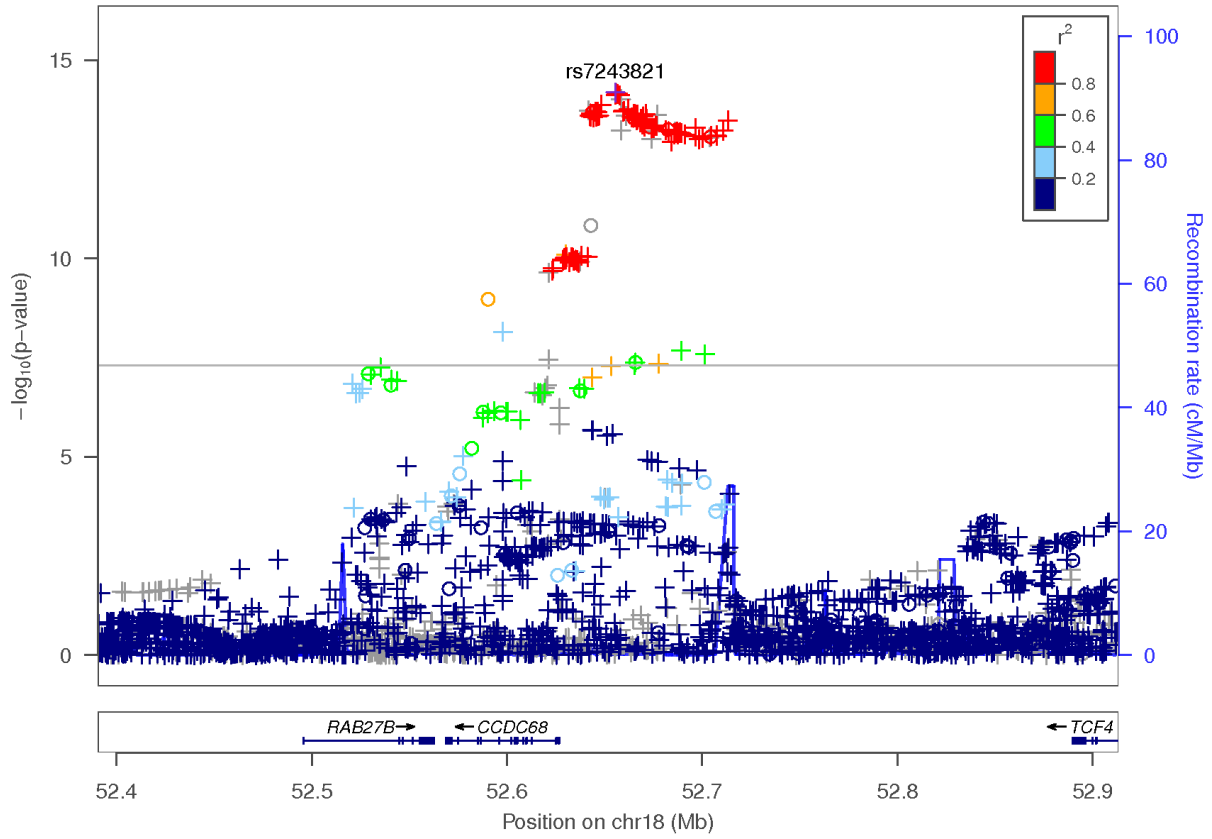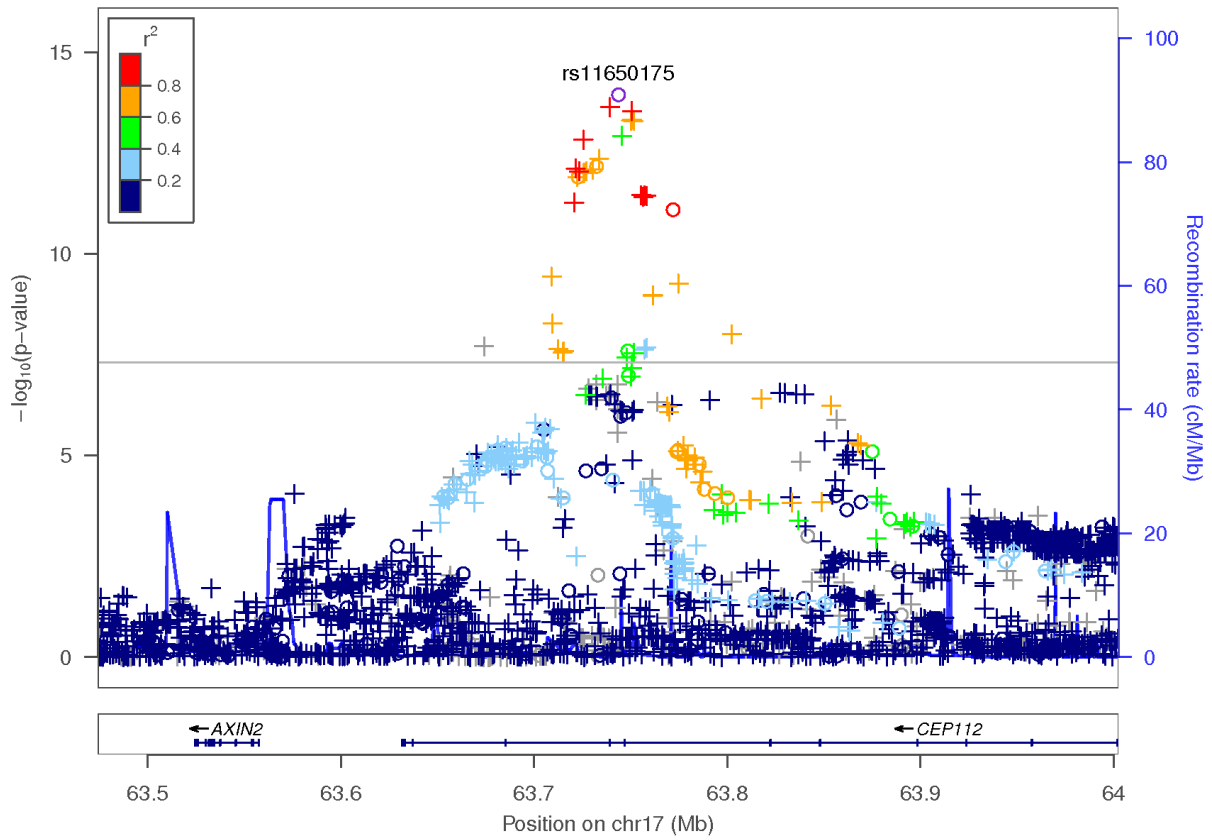

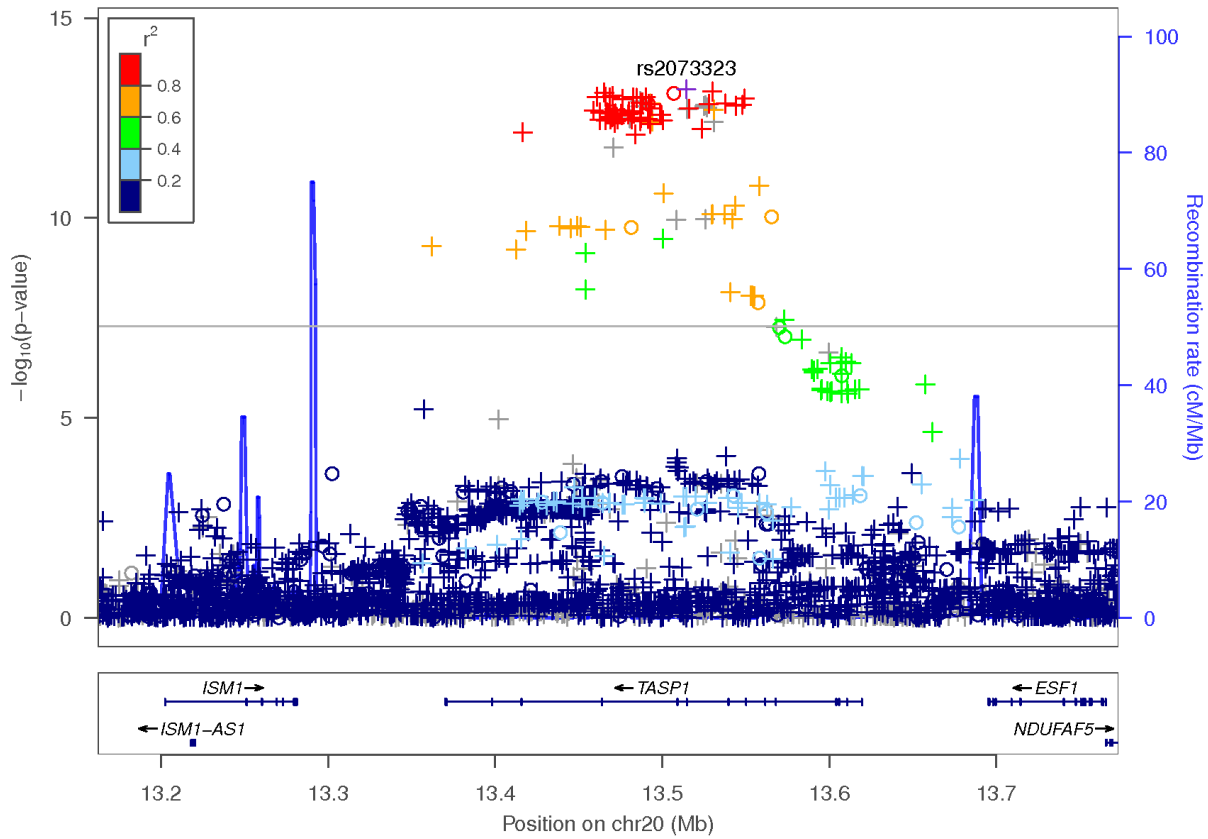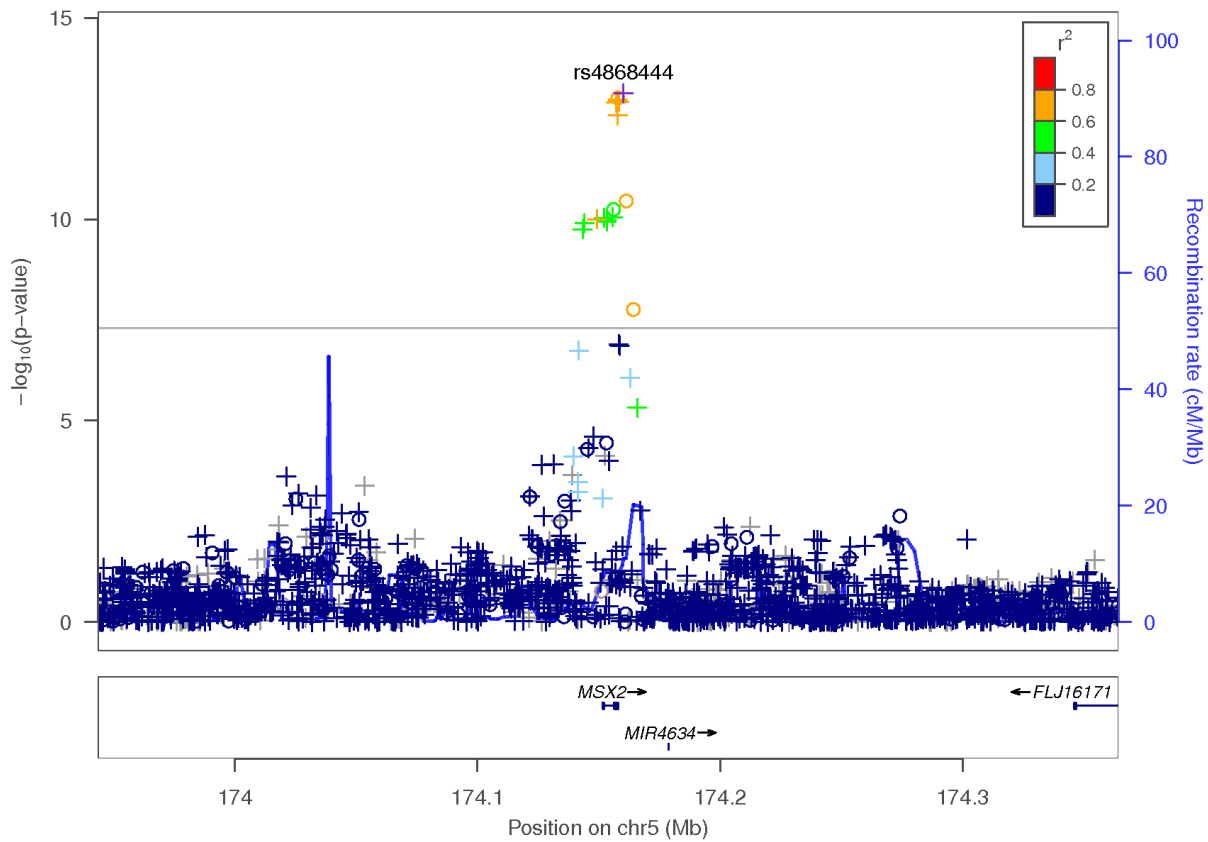

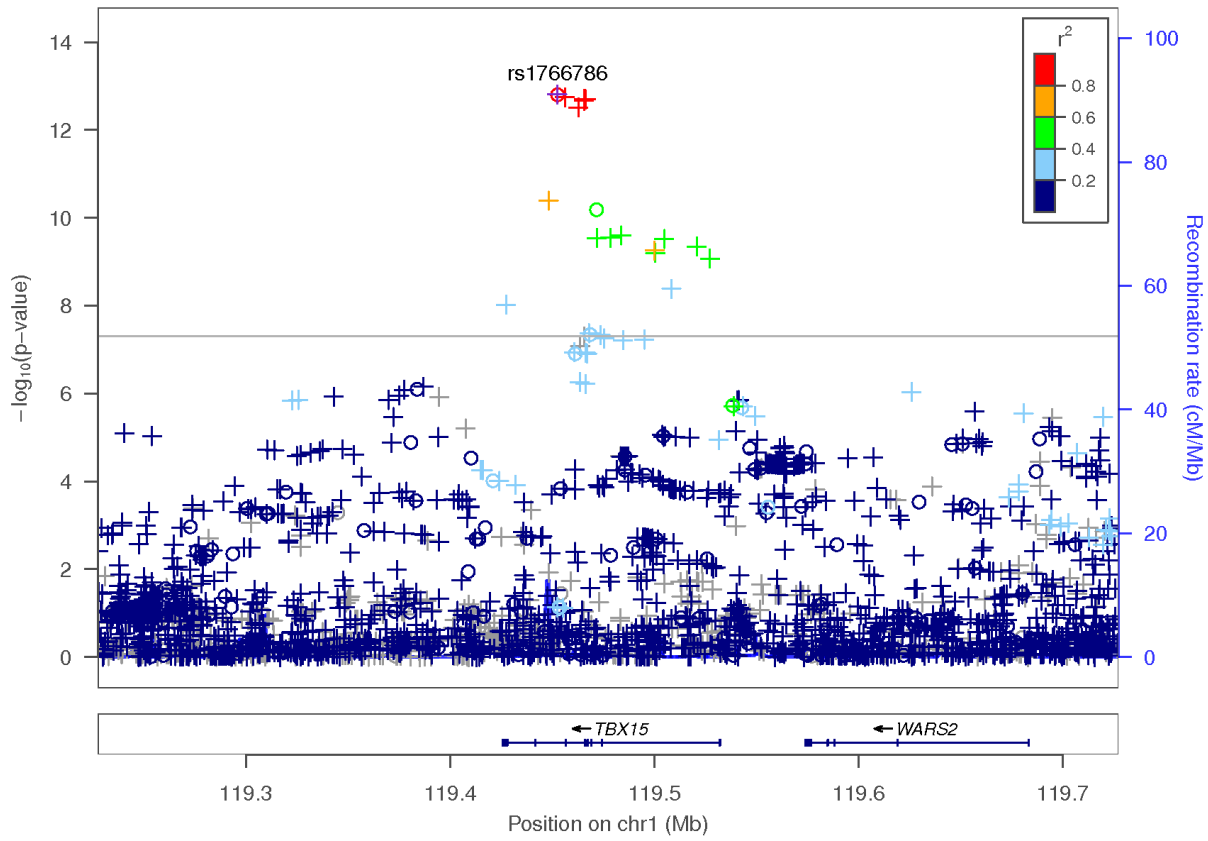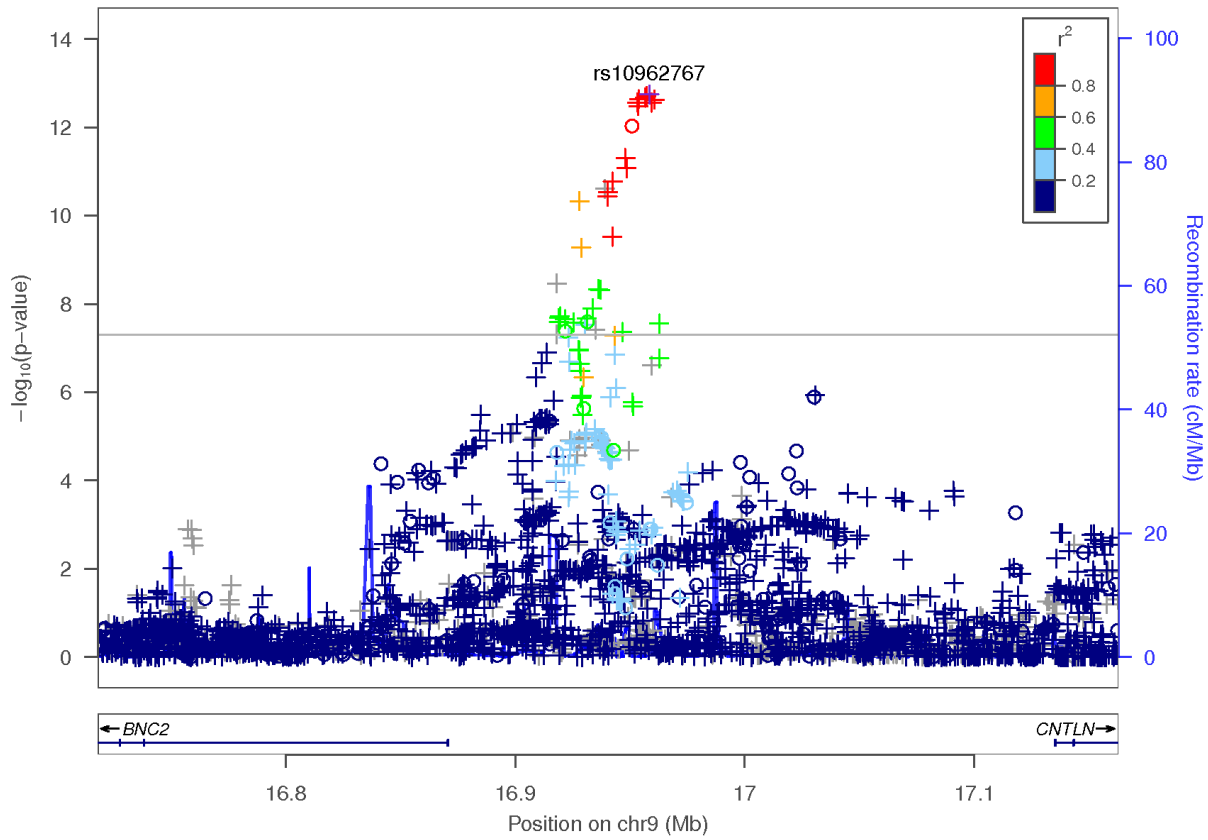



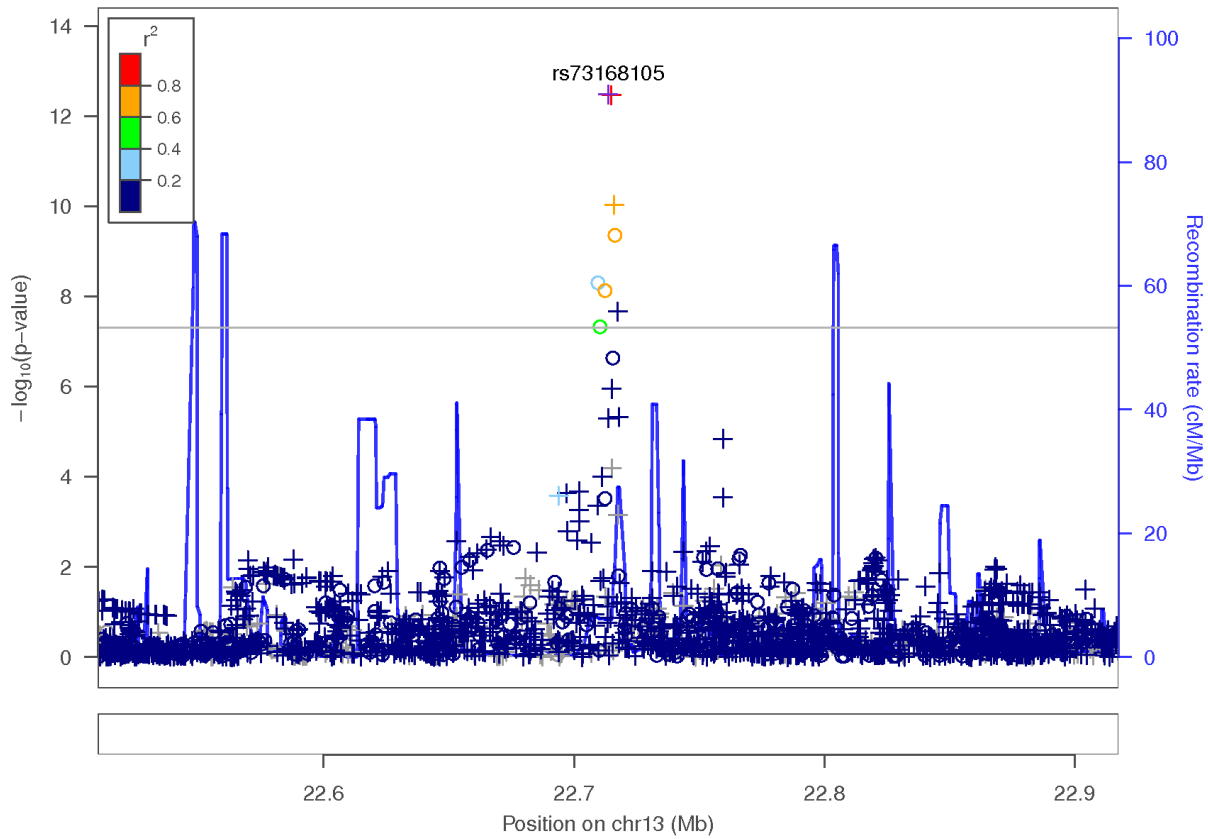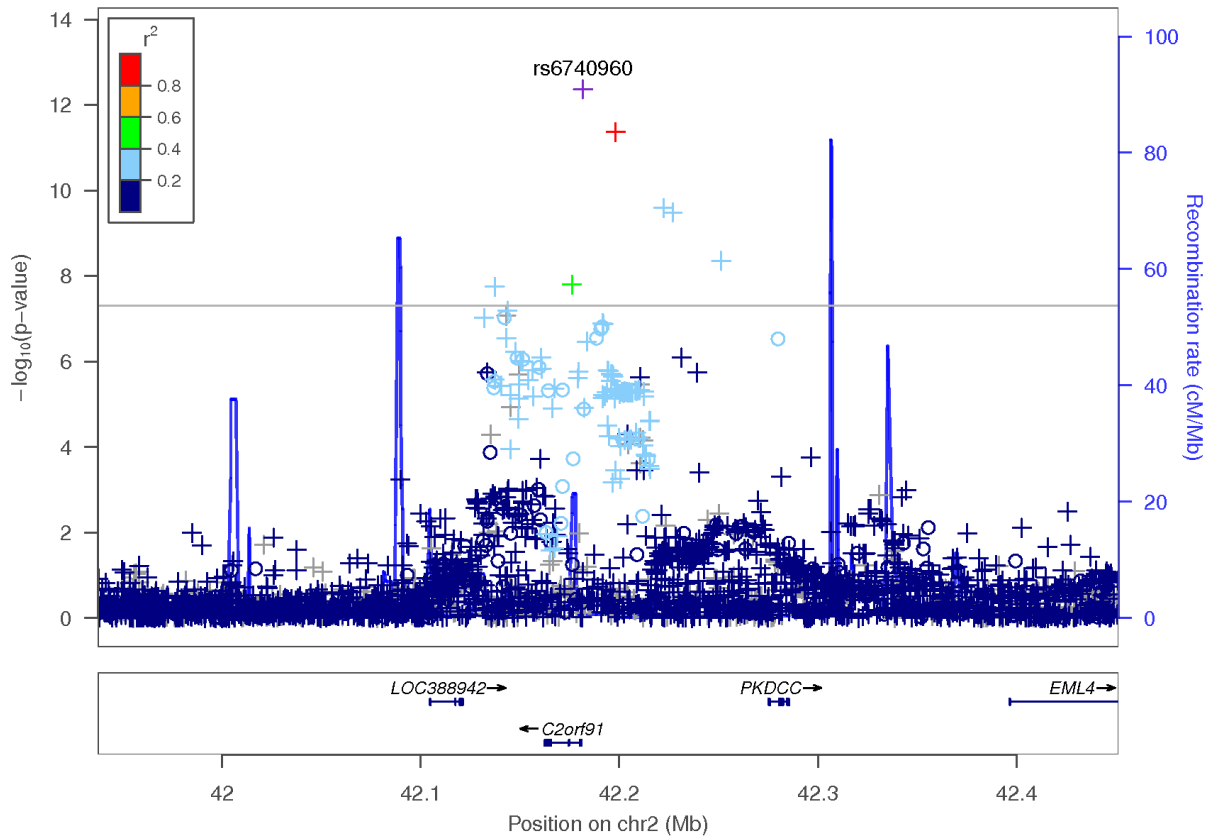

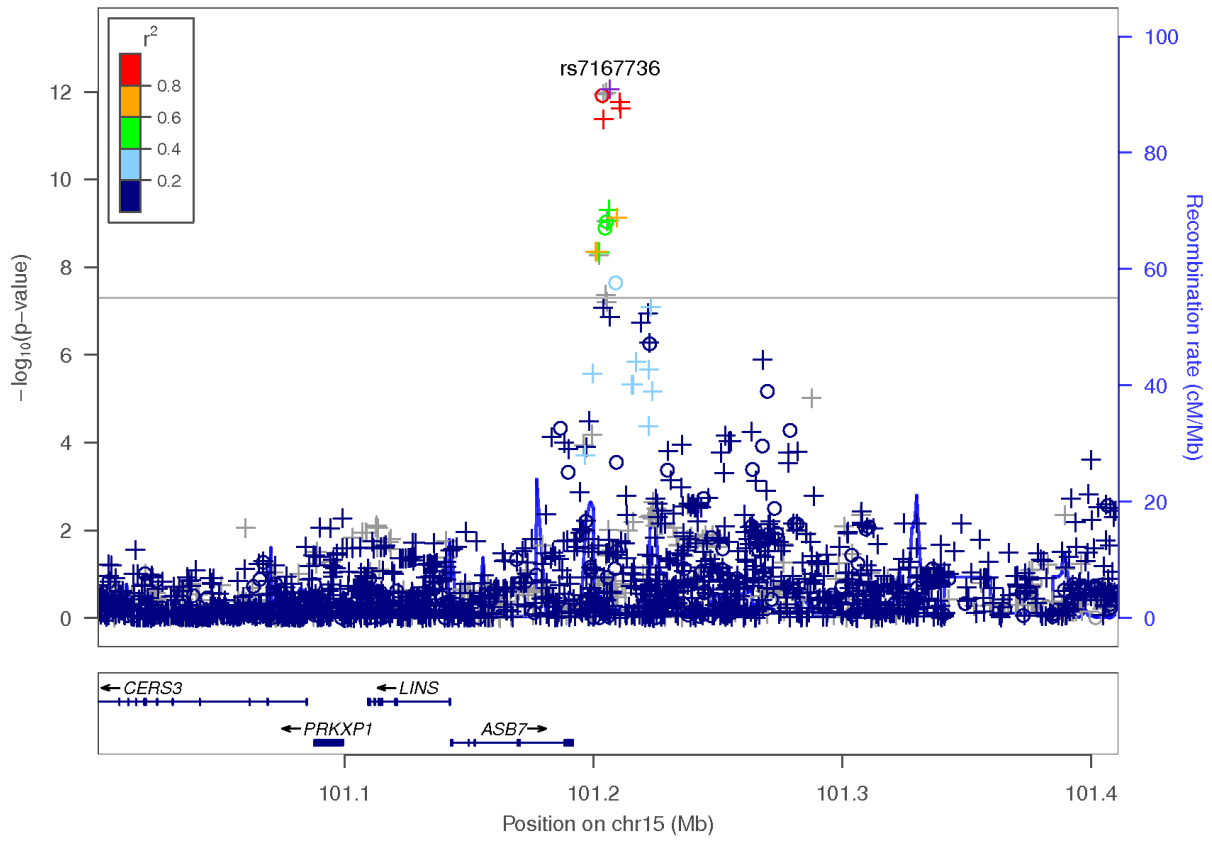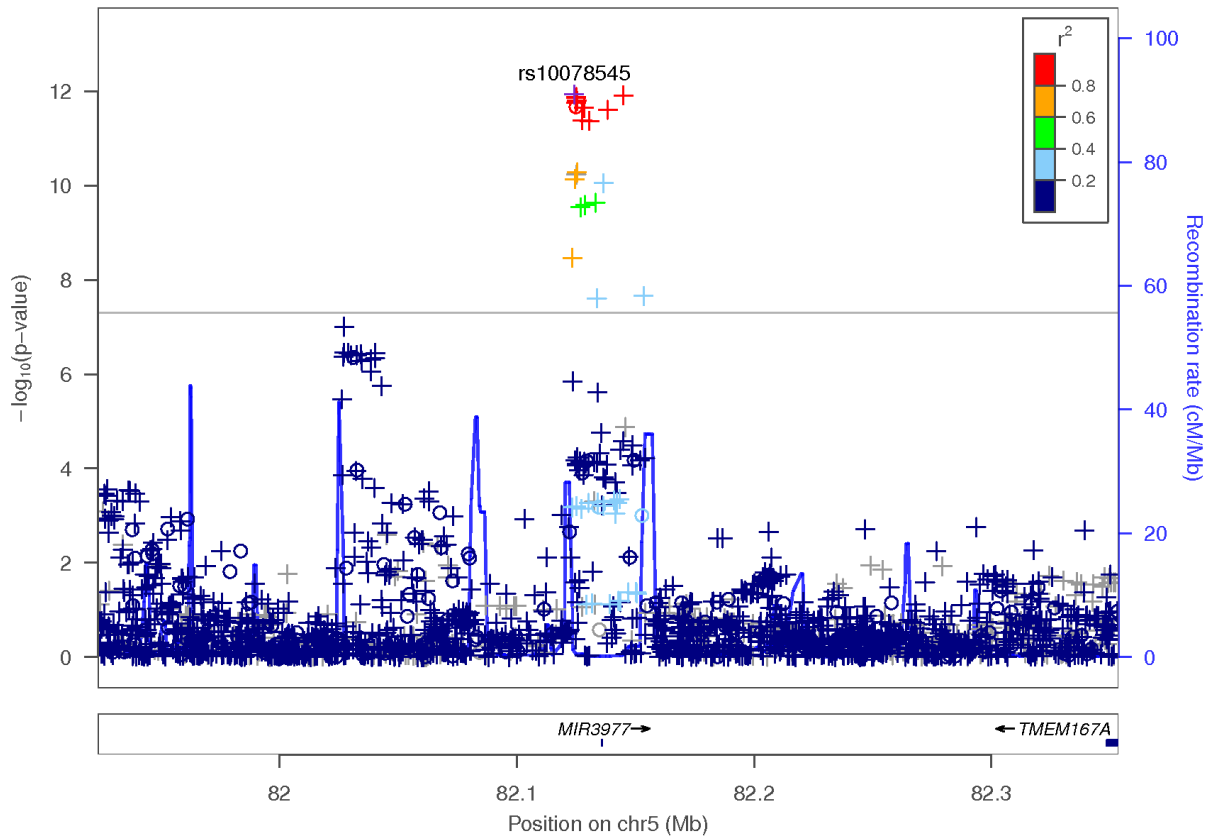

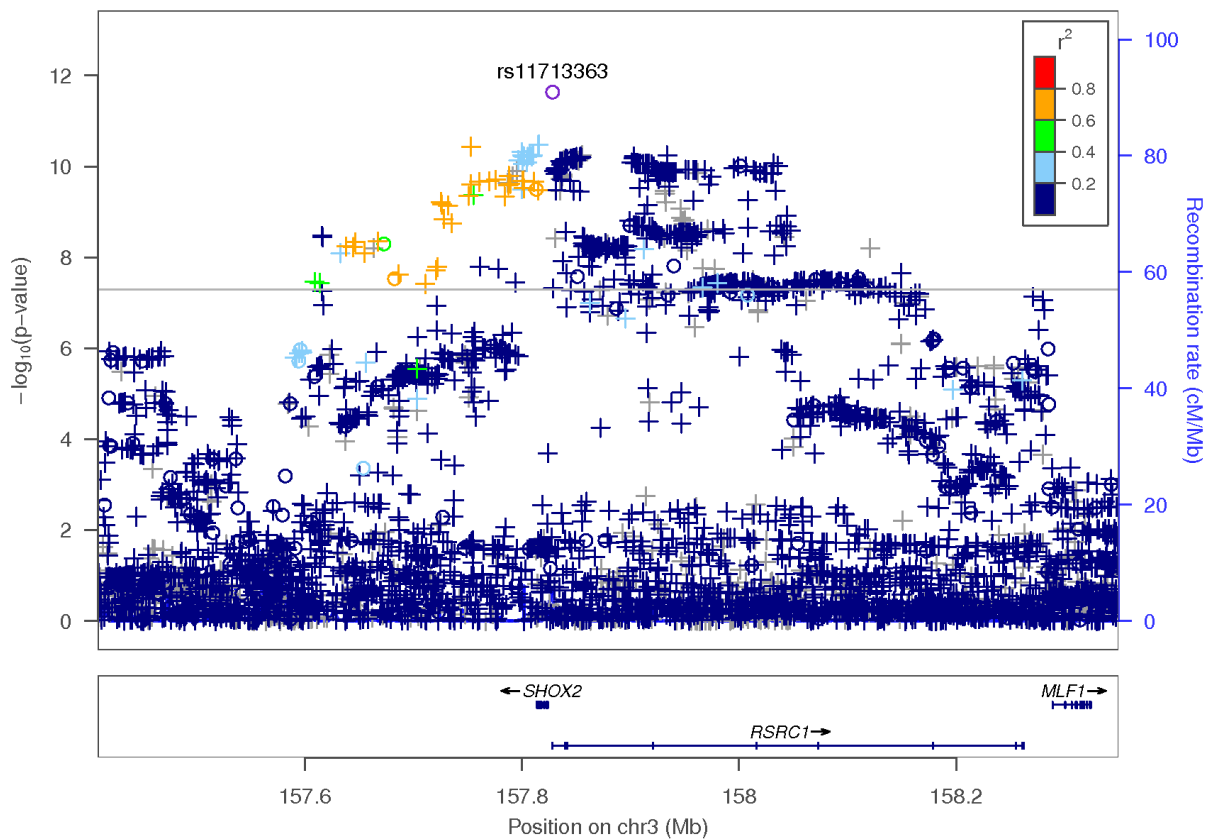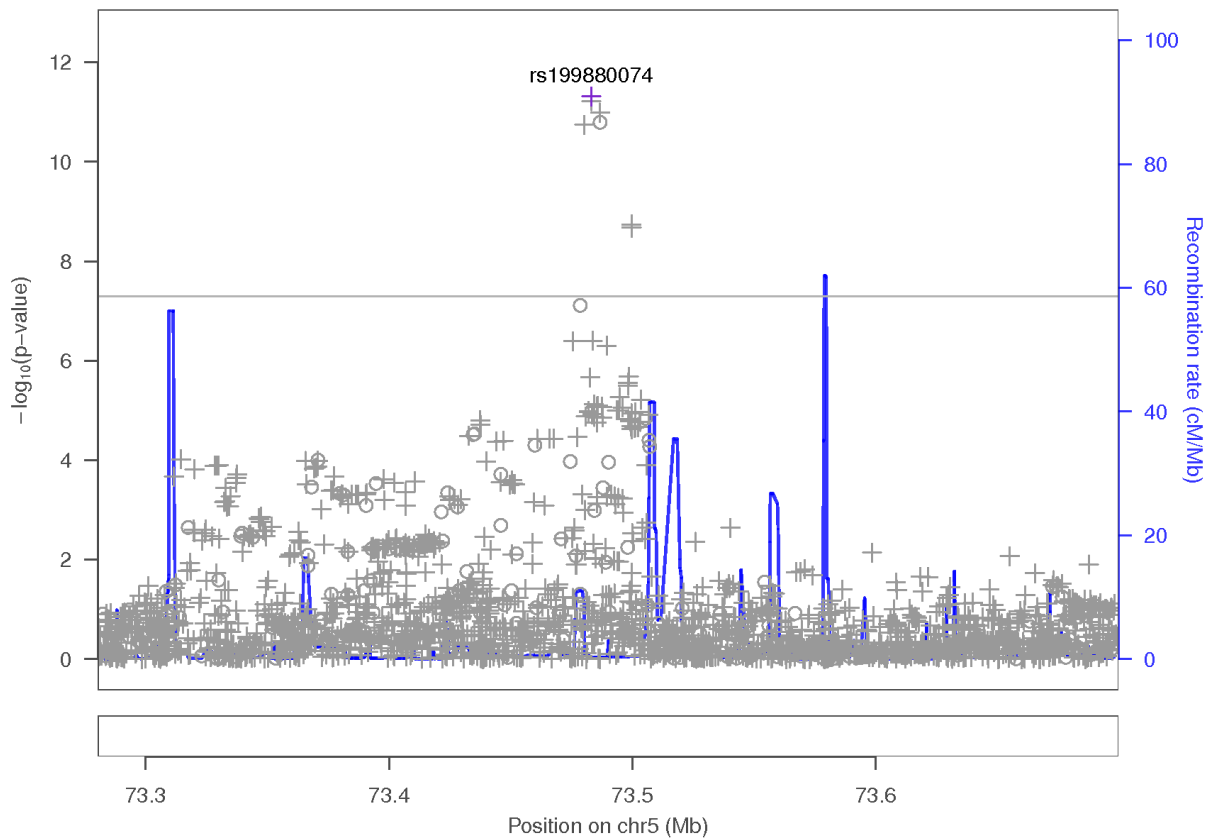

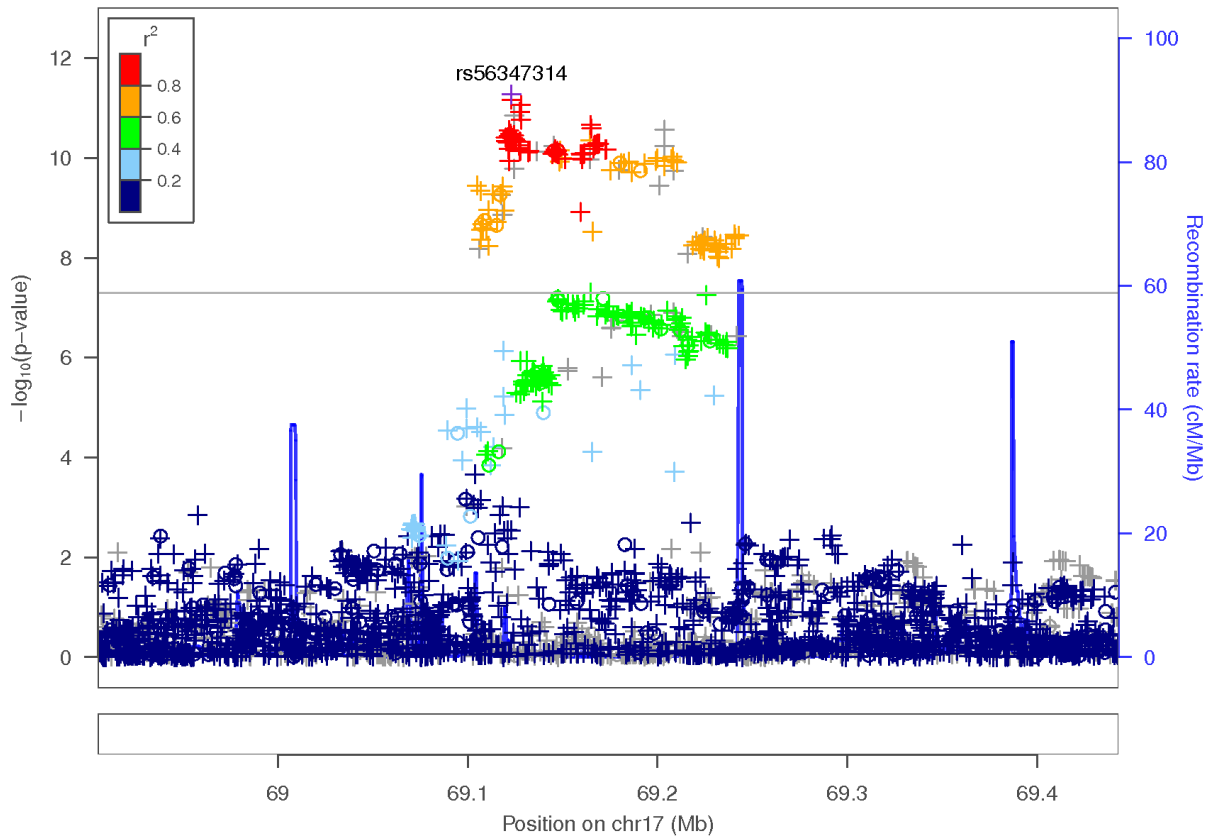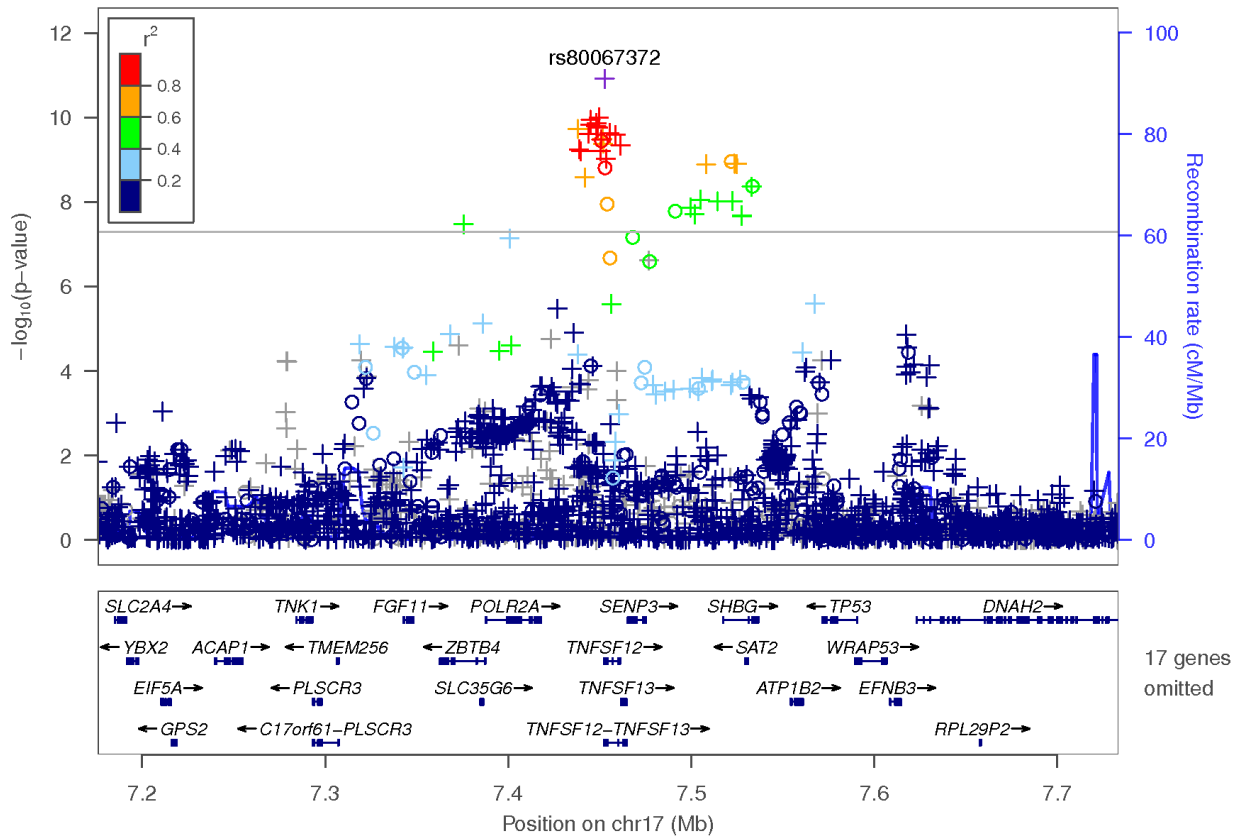

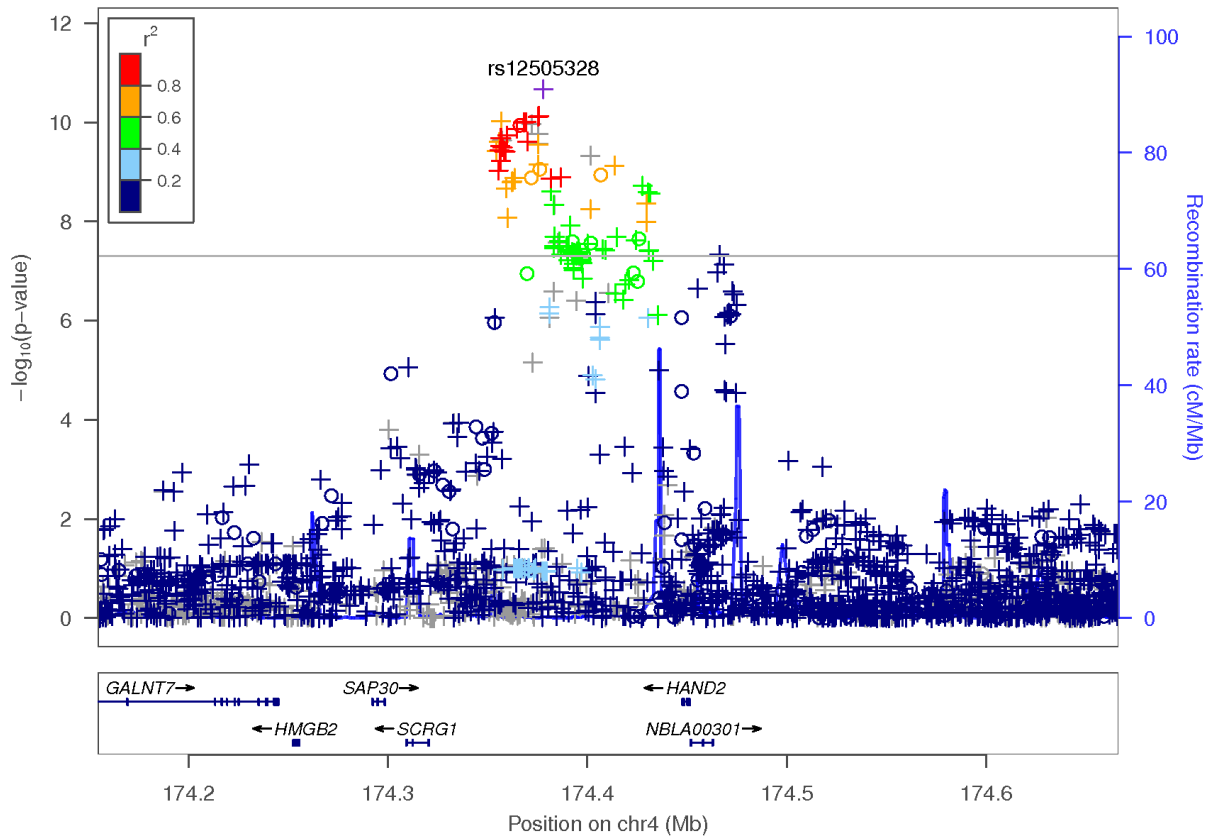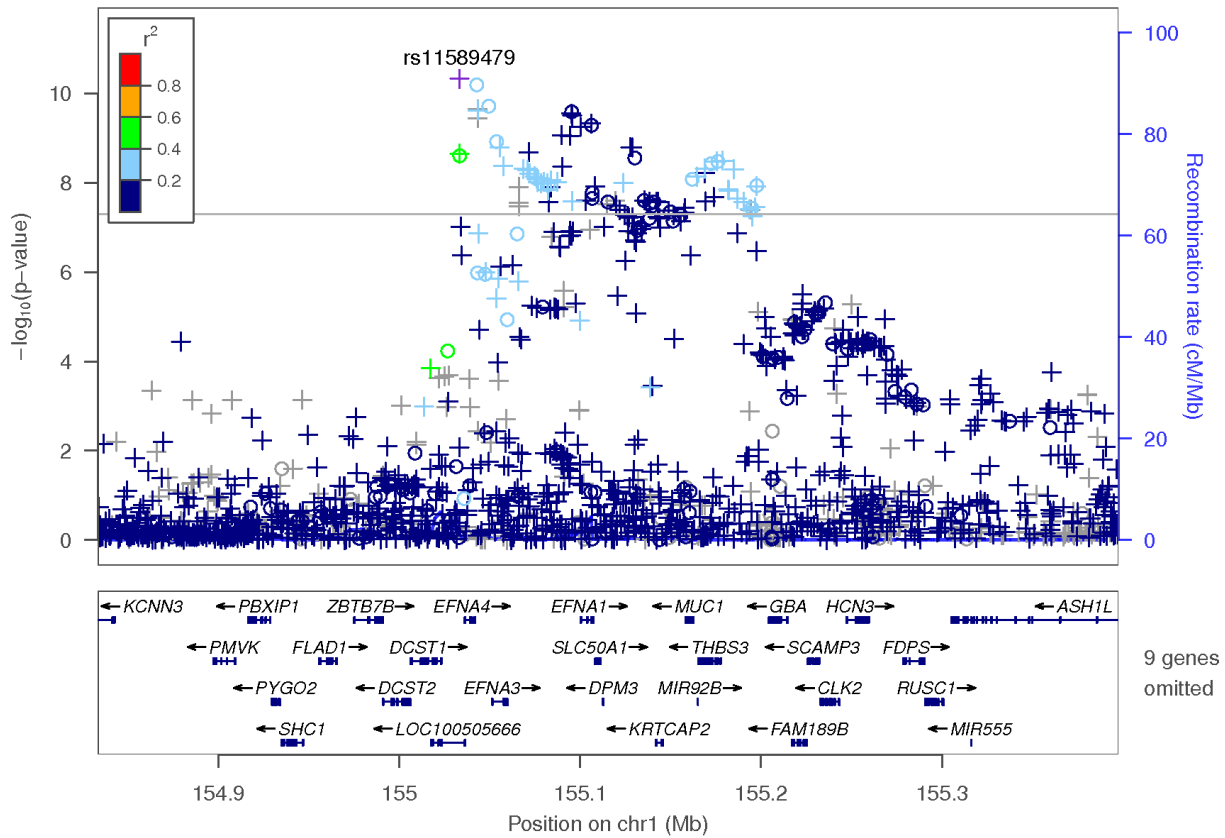

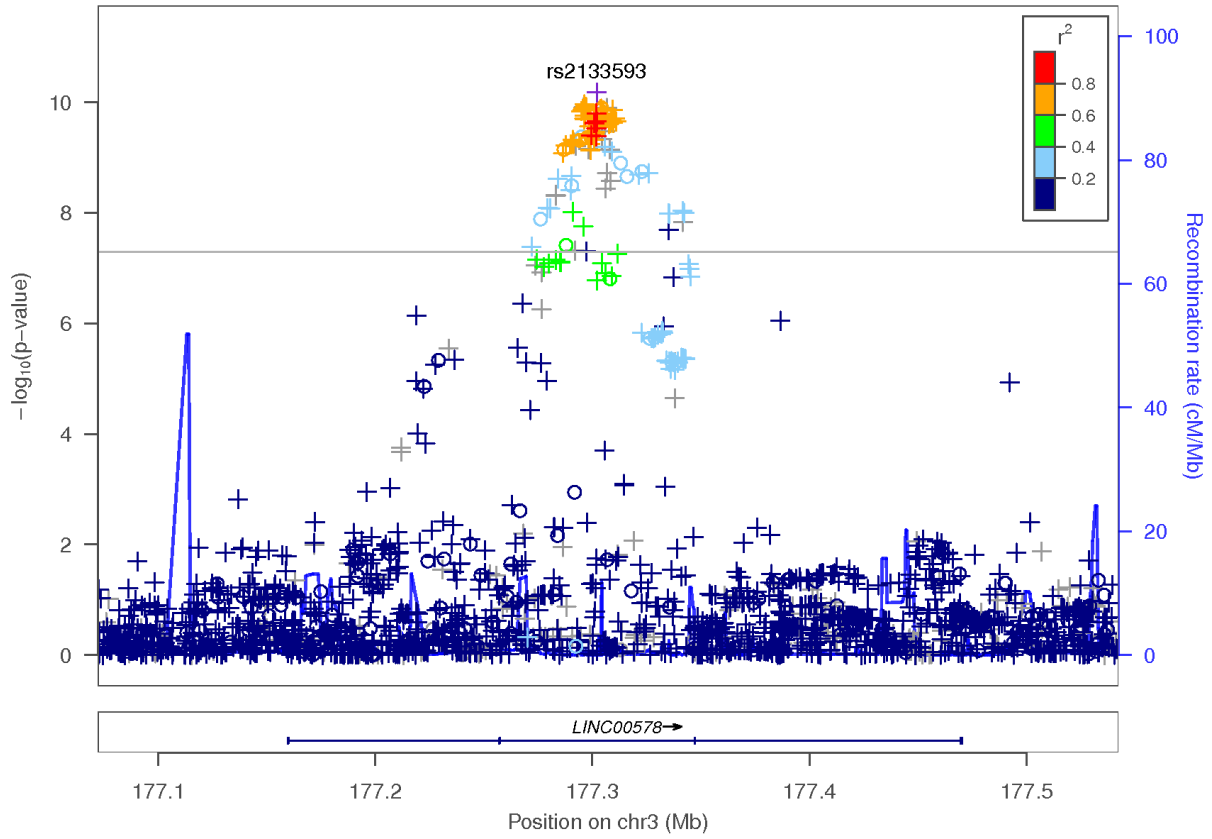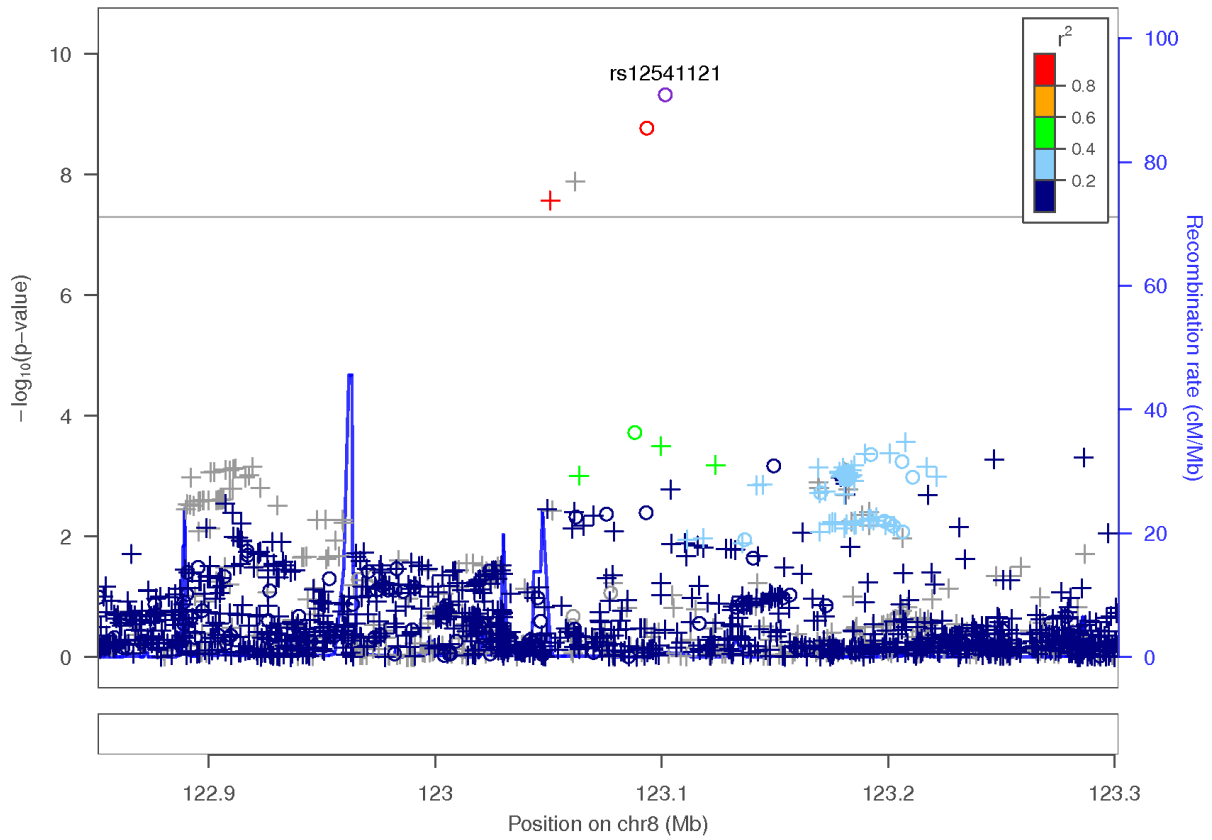

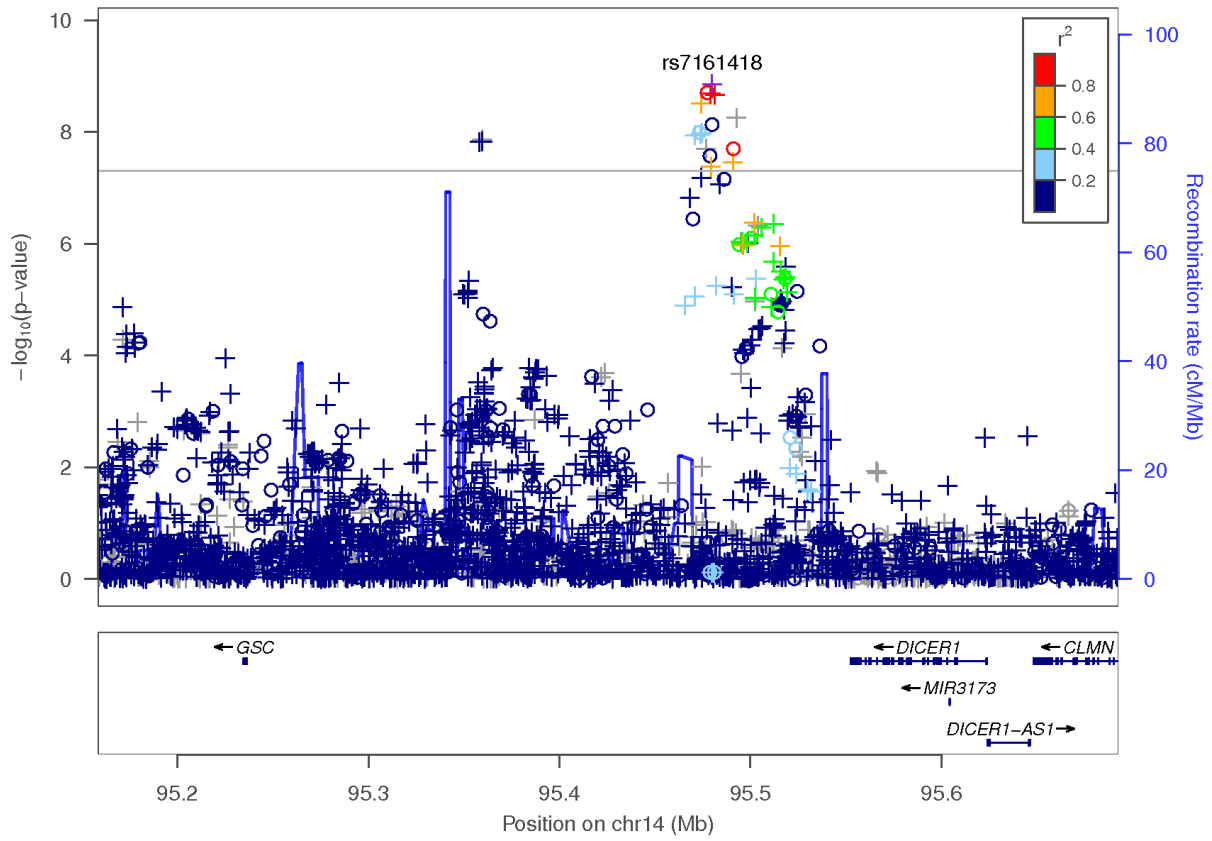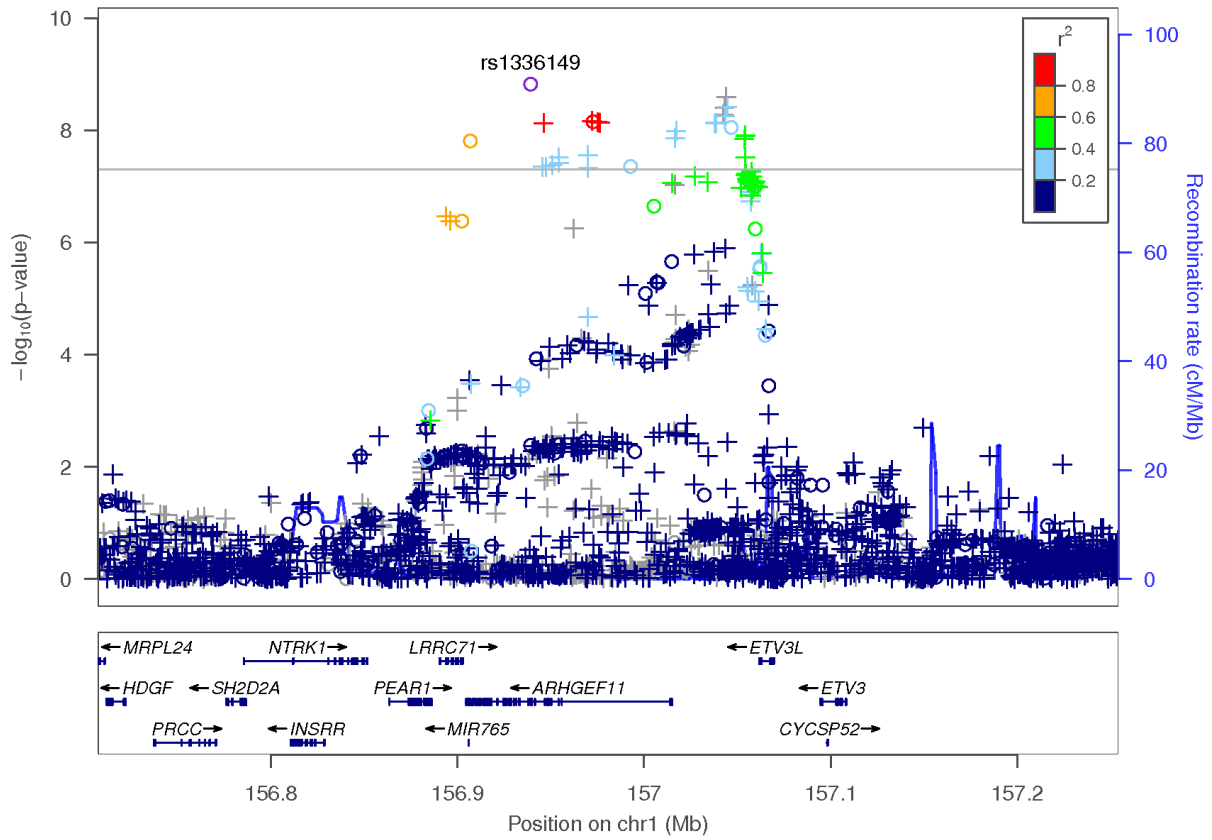

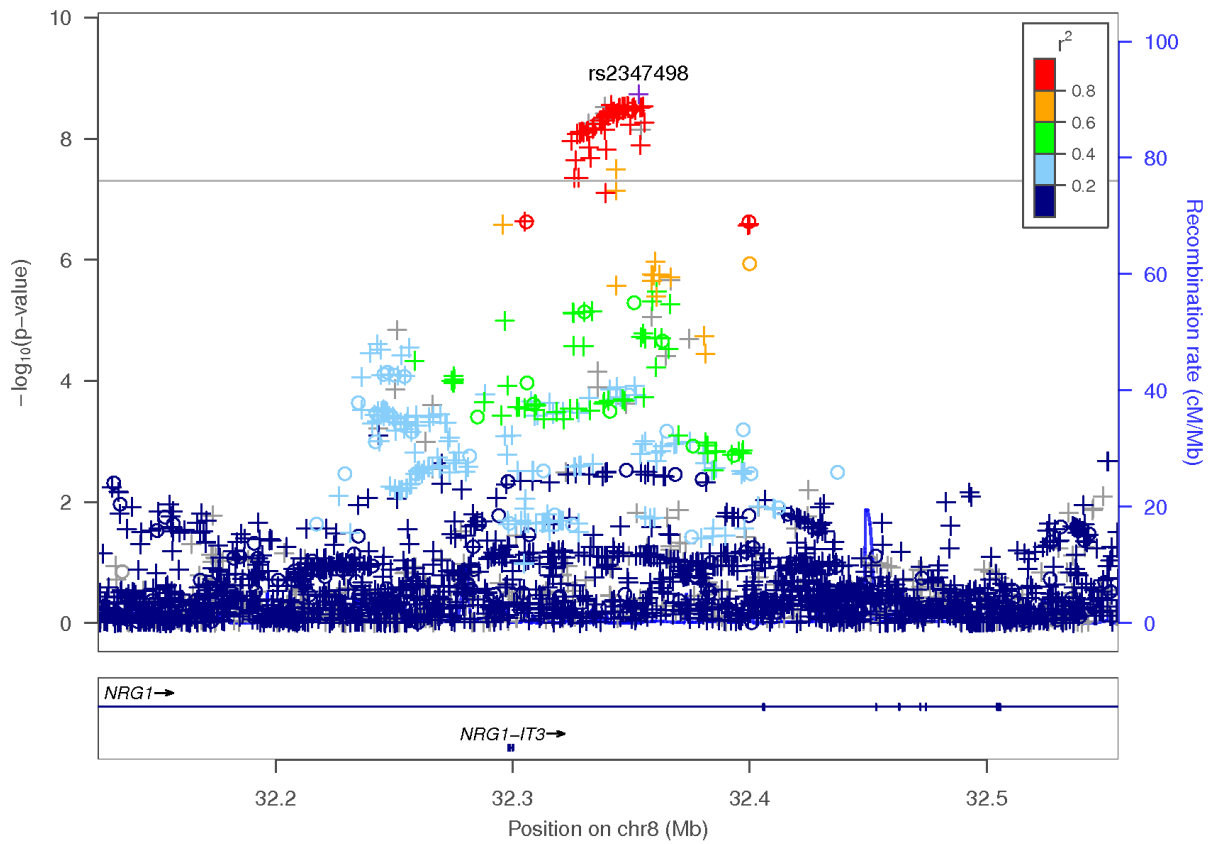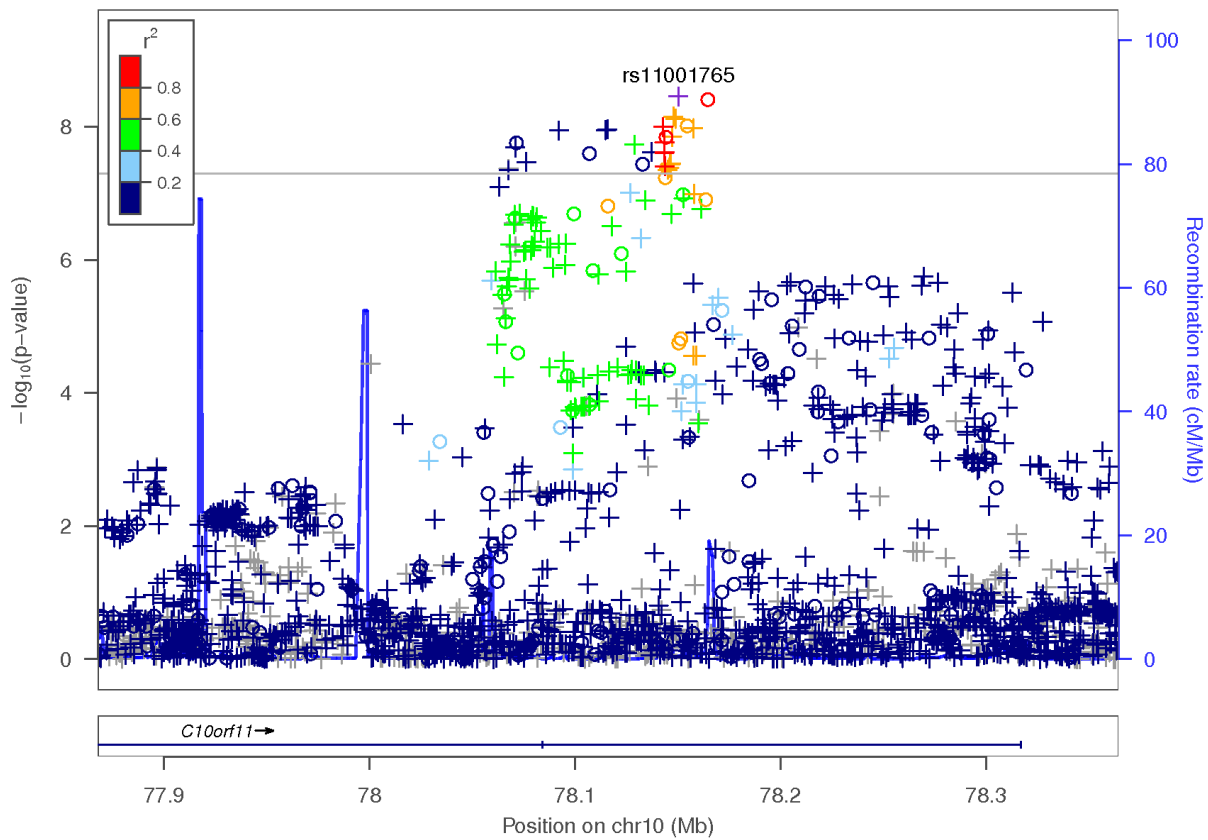



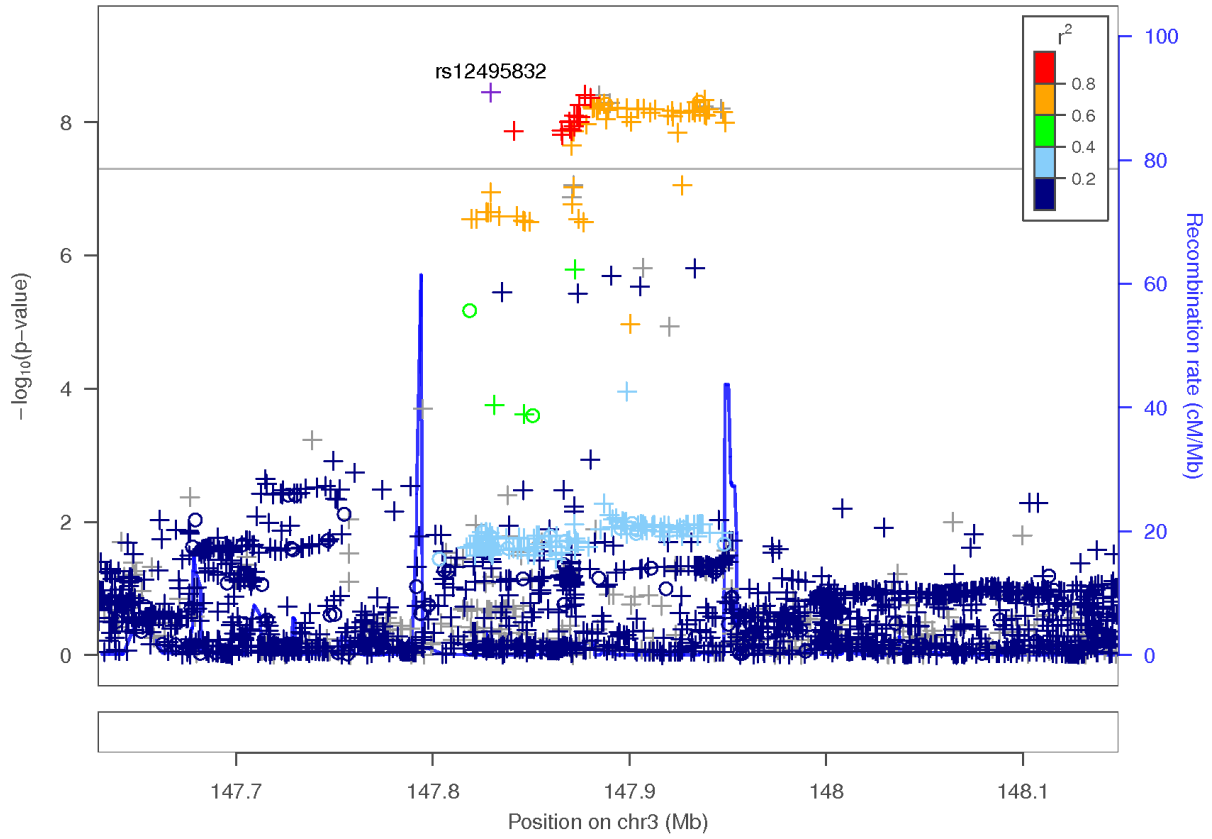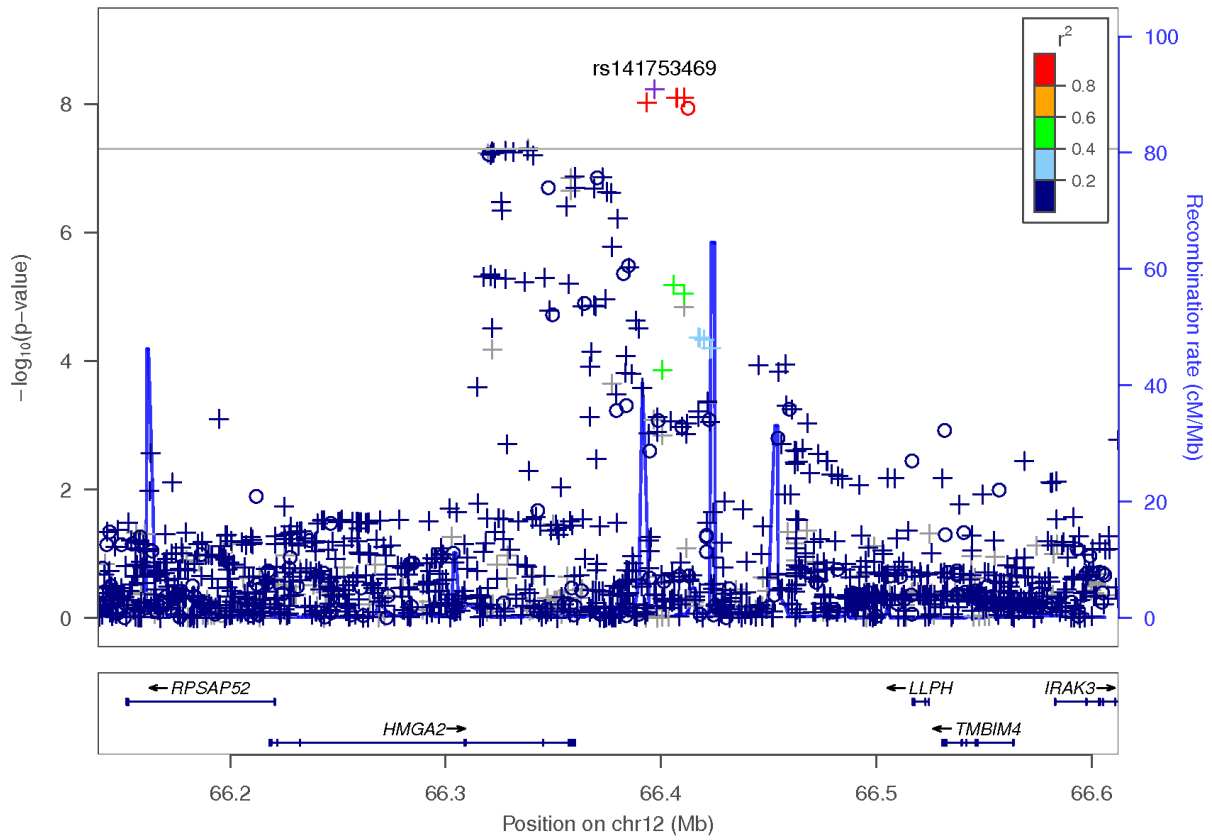

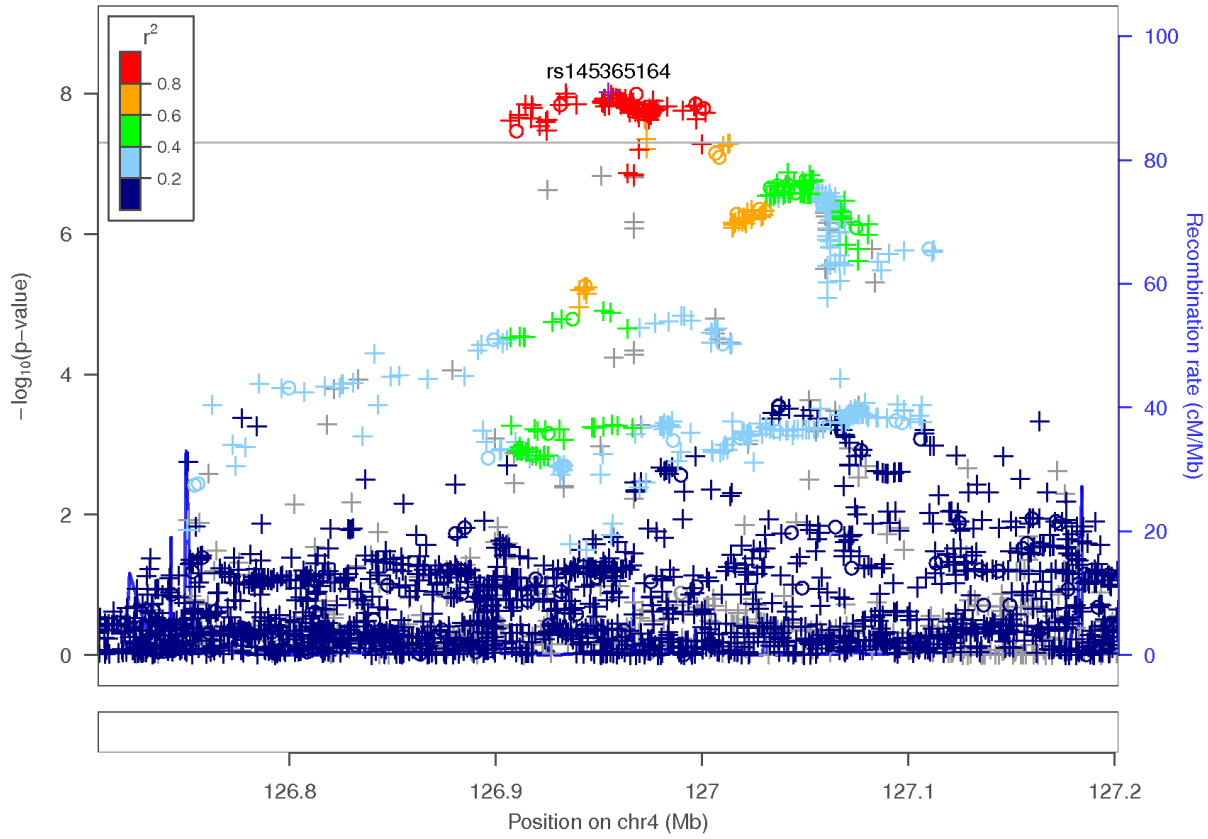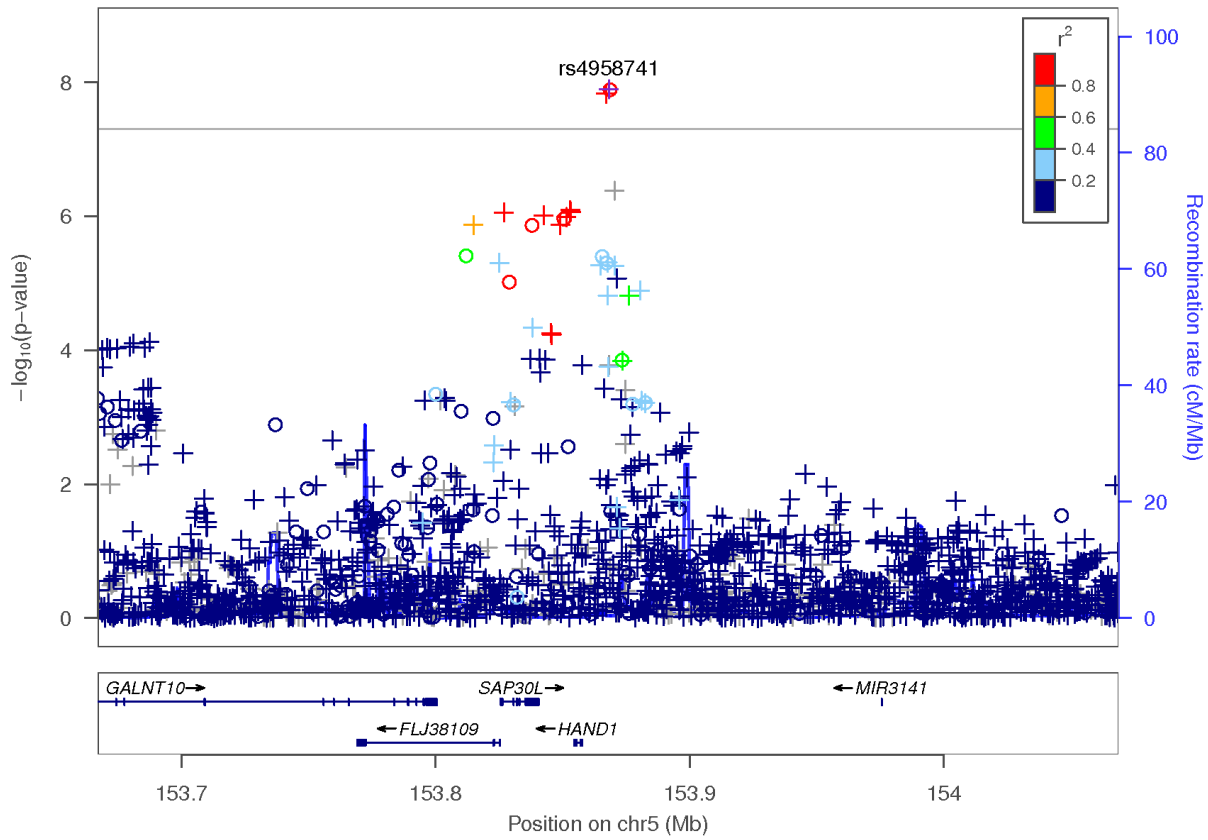

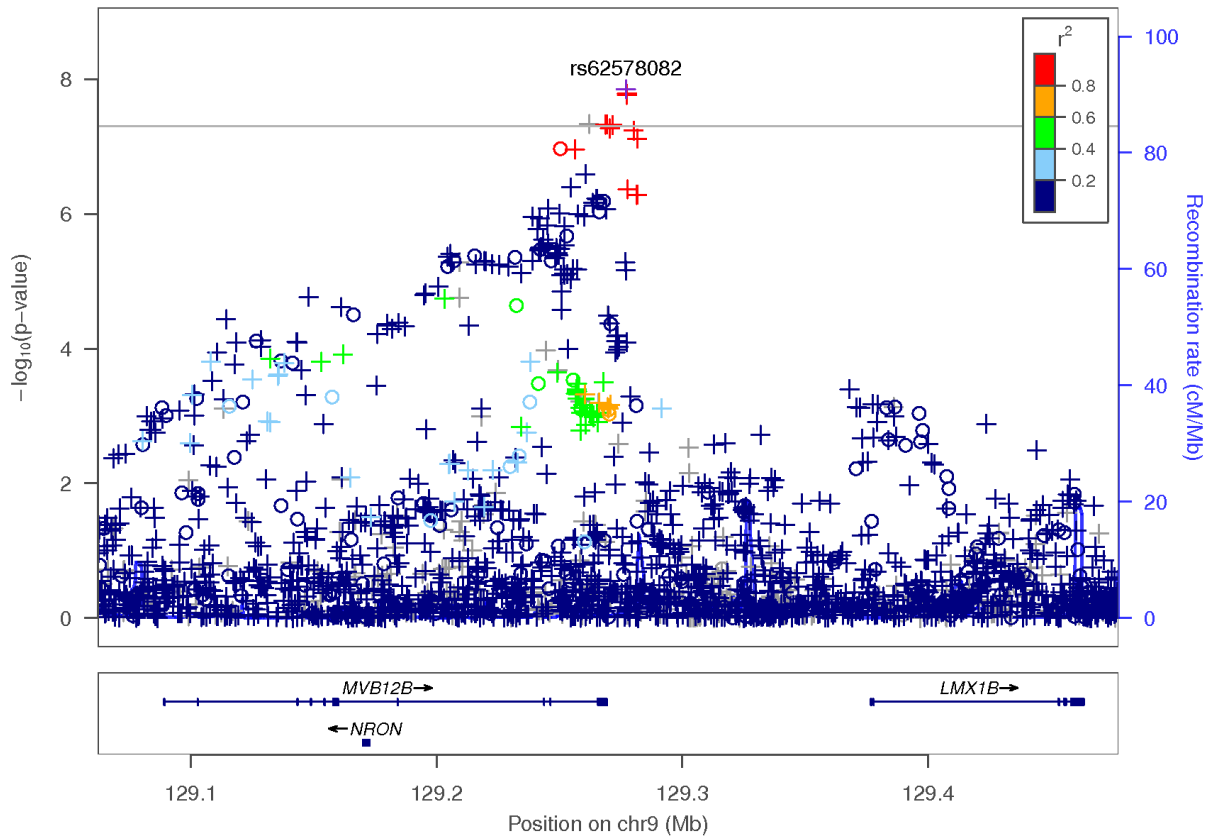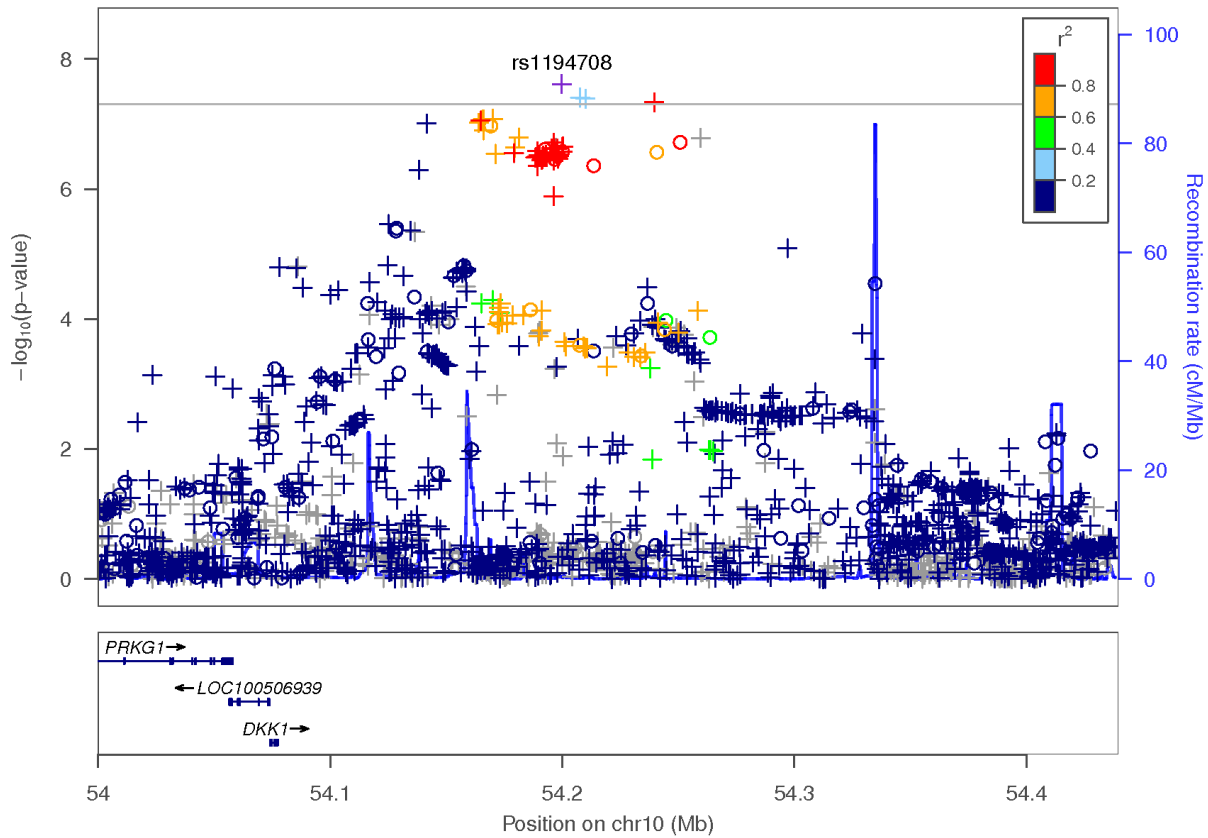

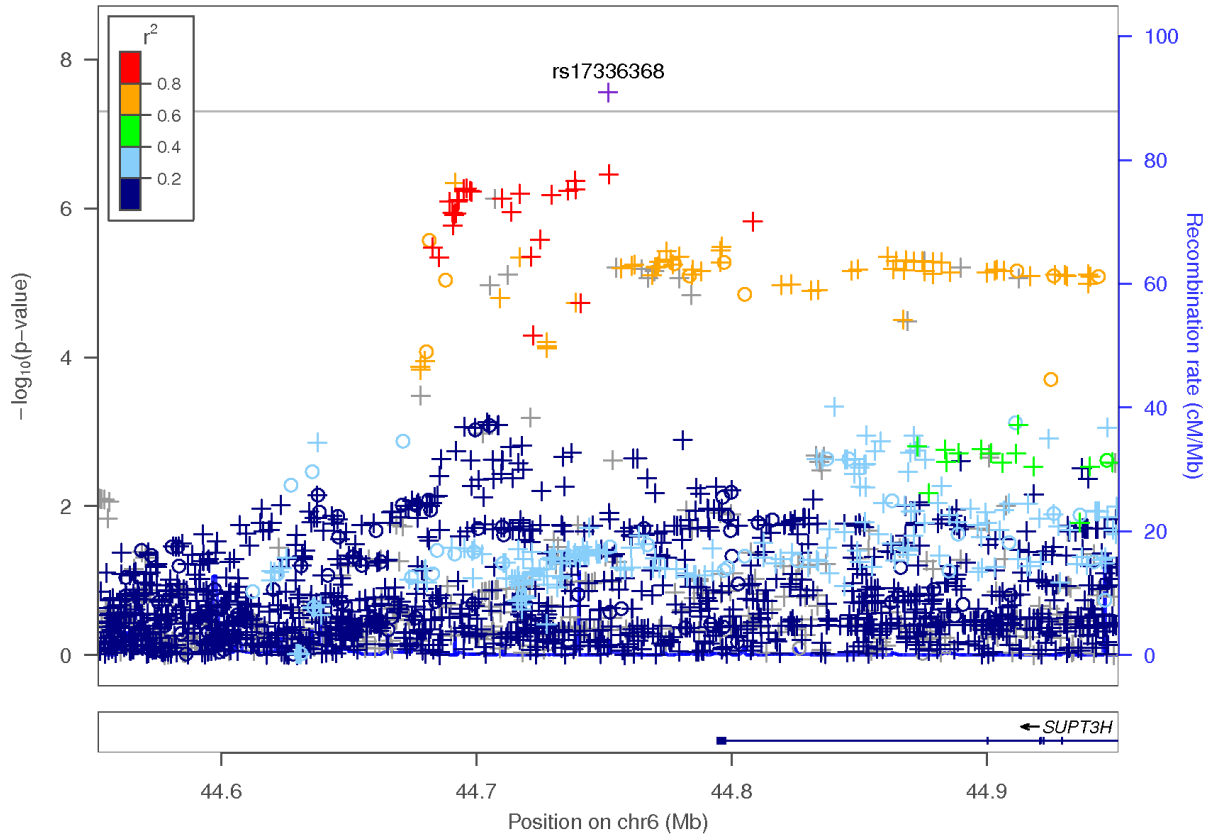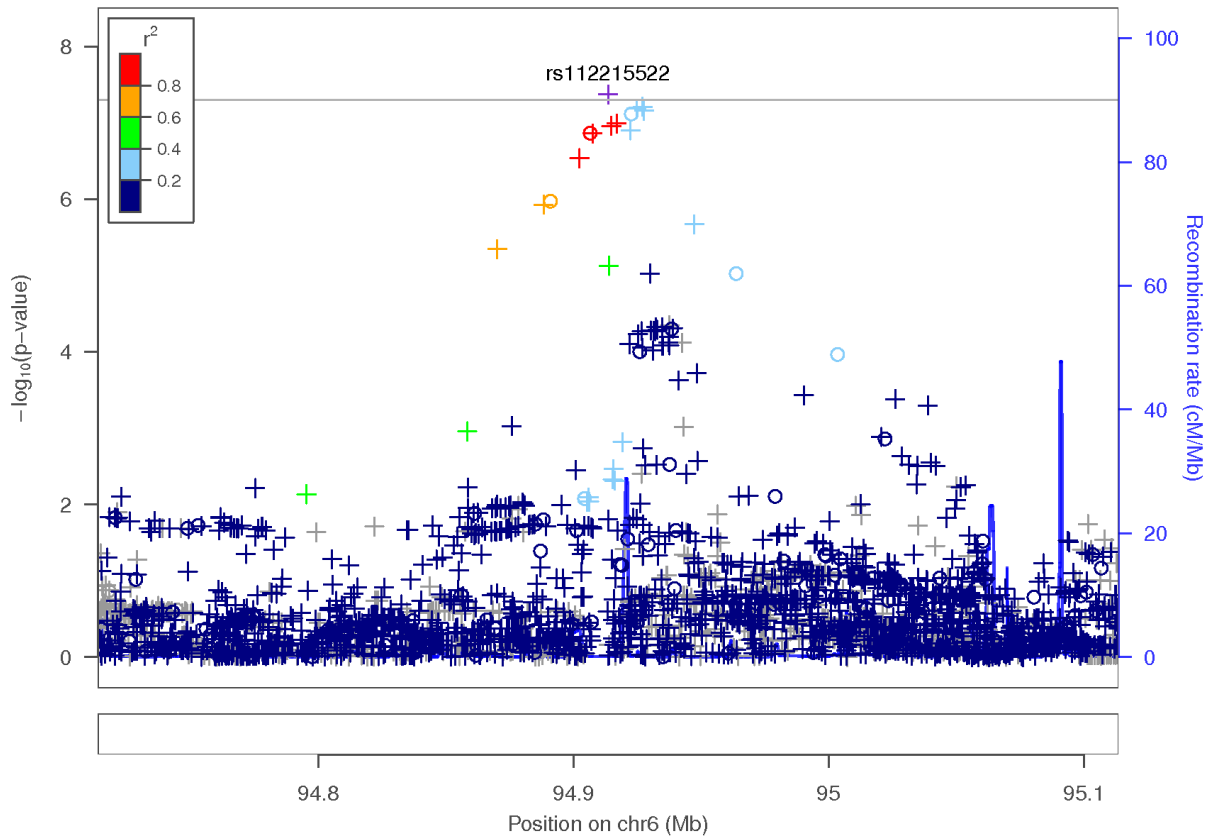

Supplement: NIHMS780506-supplement-18.pdf [file NIHMS780506-supplement-18.pdf]
