# Supplementary material
Source: PubMed Central journal article supplement (PMC5207801)

# Analysis Summary: nose size

---

## Phenotype Description

---

The nose size phenotype comes from one question

- “Morphology” survey
  - “Looking at your nose in profile, which image best matches the shape, NOT the size, of your nose <em>in profile</em>? (You may need to take a picture or use two mirrors to get a better view of your nose from the side. If you have had surgery that may have altered the shape of your nose, please answer for how your nose looked prior to the surgery or surgeries.” (16 pictures (a-p) plus “I’m not sure” and “None of the above” options)

The nose size phenotype is scored from 0–3, with 0 encompassing the six smallest pictures (a, b, c, d, e, f), 1 the next five largest (g, h, i, j, n), 2 the next three largest (o, k, l), and 3 the two biggest (m, p).

## Phenotype Statistics

---

The following table shows demographics of unrelated, European individuals included in the GWAS.

| Phenotype | Group  | Total | M     | F     | (0,30] | (30,45] | (45,60] | (60,Inf] |
|-----------|--------|-------|-------|-------|--------|---------|---------|----------|
| nose_size | small  | 29205 | 11760 | 17445 | 4376   | 9224    | 7424    | 8181     |
|           | normal | 26425 | 16028 | 10397 | 3635   | 8729    | 6826    | 7235     |
|           | large  | 10773 | 7459  | 3314  | 1454   | 3430    | 2906    | 2983     |
|           | huge   | 620   | 452   | 168   | 59     | 151     | 196     | 214      |

The following table shows the phenotypic distribution across 23andMe genotyping platforms for individuals included in the GWAS.

| Phenotype | Group  | Total | v1/v2 | v3    | v4   |
|-----------|--------|-------|-------|-------|------|
| nose_size | small  | 29205 | 3422  | 24437 | 1346 |
|           | normal | 26425 | 3198  | 22096 | 1131 |
|           | large  | 10773 | 1241  | 9125  | 407  |
|           | huge   | 620   | 101   | 491   | 28   |

## Null Model with Covariates

---

The following table shows results of fitting a model for the trait based on just the covariates. Principal coordinates have been standardized, so these effect sizes are in units of standard deviations.

|      | Estimate | Std. Error | t value | Pr(> t )              |
|------|----------|------------|---------|-----------------------|
| age  | 0.00147  | 0.000177   | 8.3     | $8.2 \times 10^{-17}$ |
| sexF | -0.33297 | 0.005606   | -59.4   | 0.0                   |
| pc.0 | -0.12359 | 0.002799   | -44.2   | 0.0                   |
| pc.1 | 0.01629  | 0.002812   | 5.8     | $7.0 \times 10^{-9}$  |
| pc.2 | 0.01375  | 0.002810   | 4.9     | $1.0 \times 10^{-6}$  |
| pc.3 | 0.00463  | 0.002802   | 1.7     | 0.099                 |
| pc.4 | 0.01133  | 0.002802   | 4.0     | $5.3 \times 10^{-5}$  |

## Q-Q plot of scaled residuals

---

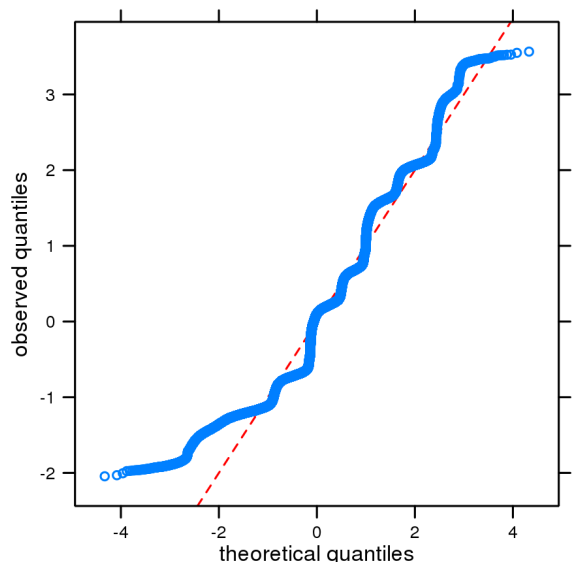

## SNP-level QC information

---

The following table shows results for QC filters on the genotyped data:

|                         | <b>failed</b> | <b>passed</b> |
|-------------------------|---------------|---------------|
| no filters              | 0             | 1030430       |
| not V1-only, chrM, chrY | 4790          | 1025640       |
| parent-offspring test   | 2129          | 1023511       |
| MAF > 0%                | 3203          | 1020494       |
| HWE > 1e-20             | 48225         | 972832        |
| gt.rate > 90%           | 30775         | 952826        |
| batch effects           | 28267         | 945446        |

The following table shows results for QC filters on the imputed dosage data:

|                    | <b>failed</b> | <b>passed</b> |
|--------------------|---------------|---------------|
| no filters         | 0             | 13733809      |
| MAF > 0%           | 0             | 13733809      |
| imputation quality | 0             | 13733809      |
| batch effects      | 2168          | 13731641      |

The following table shows results for QC filters on the merged association test results:

|                | <b>passed</b> | <b>total</b> |
|----------------|---------------|--------------|
| imputed only   | 12833621      | 12833621     |
| both passed    | 898002        | 13731623     |
| genotyped only | 47444         | 13779067     |
| no test result | -16867        | 13762200     |
| MAF < 0.1%     | -1722709      | 12039491     |

## Genetic Association Tests

---

We performed linear regression assuming an additive model for allelic effects, using the model:

$$\text{nose\_size} \sim \text{age} + \text{sex} + \text{pc.0} + \text{pc.1} + \text{pc.2} + \text{pc.3} + \text{pc.4} + \text{genotype}$$

This genome-wide association analysis includes data from 67023 individuals of European ancestry, filtered to remove close relatives.

The results in this report have been adjusted for a genomic control inflation factor  $\lambda=1.088$ . The equivalent inflation factor rescaled for a sample size of 2000 would be  $\lambda_{2000}= 1.003$  , and for 20000,  $\lambda_{20000}= 1.026$  .

## Manhattan Plot

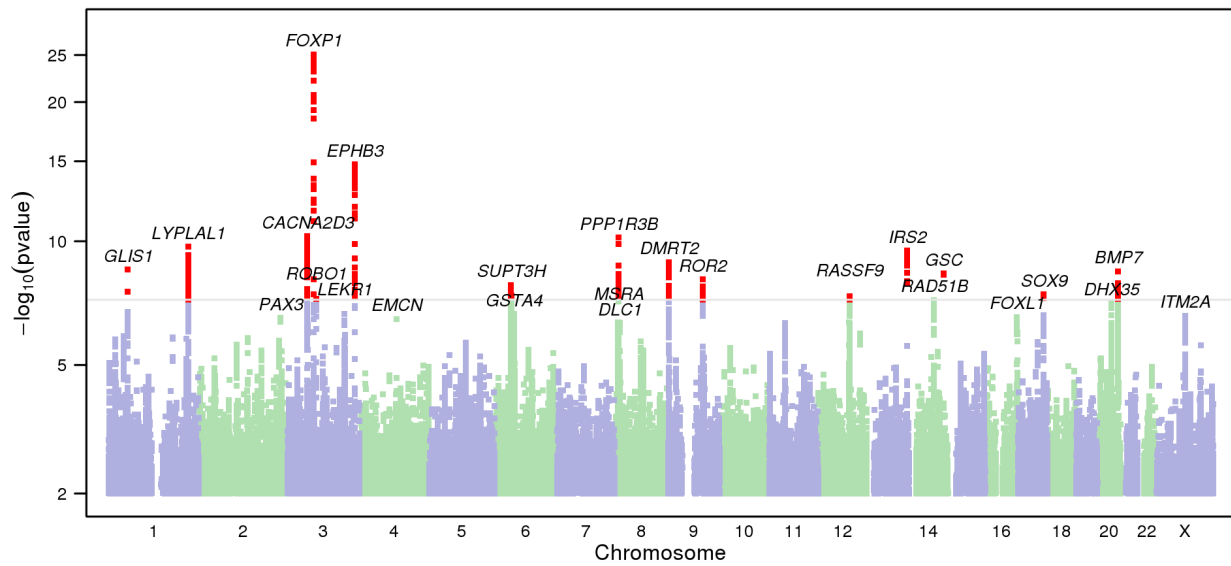

## Q-Q Plot of GWAS Results

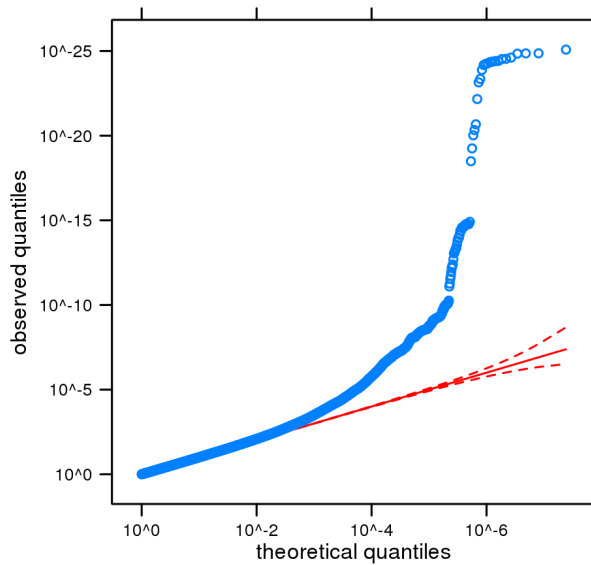

## Index SNPs for Strongest Associations

| cytoband | assay.name       | scaffold | position  | alleles | src | pvalue                | effect | 95% CI          | gene.context                  |
|----------|------------------|----------|-----------|---------|-----|-----------------------|--------|-----------------|-------------------------------|
| 3p13     | 3:71227306:T_TGA | chr3     | 71227306  | D/I     | I   | $8.2 \times 10^{-26}$ | 0.049  | [0.040,0.059]   | FOXP1--[---EIF4E3             |
| 3q27.1   | rs13097965       | chr3     | 184339757 | C/T     | I   | $1.7 \times 10^{-15}$ | -0.033 | [-0.041,-0.025] | EPHB3--[---MAGEF1             |
| 3p14.3   | rs56063440       | chr3     | 54731374  | C/G     | I   | $5.5 \times 10^{-11}$ | 0.030  | [0.021,0.039]   | [CACNA2D3]                    |
| 8p23.1   | rs2929451        | chr8     | 9085295   | A/T     | I   | $6.4 \times 10^{-11}$ | 0.027  | [0.019,0.035]   | PPP1R3B--[---TNKS             |
| 1q41     | rs5781117        | chr1     | 219642187 | D/I     | I   | $1.9 \times 10^{-10}$ | 0.028  | [0.020,0.037]   | LYPLAL1---[---SLC30A10        |
| 13q34    | rs146188897      | chr13    | 110372691 | D/I     | I   | $3.0 \times 10^{-10}$ | 0.030  | [0.021,0.039]   | MYO16---[---IRS2              |
| 9p24.3   | rs10809266       | chr9     | 1106093   | A/G     | I   | $1.1 \times 10^{-9}$  | 0.027  | [0.018,0.036]   | DMRT2--[---SMARCA2            |
| 1p32.3   | rs702489         | chr1     | 54197688  | A/G     | I   | $2.5 \times 10^{-9}$  | 0.038  | [0.025,0.050]   | [GLIS1]                       |
| 20q13.31 | rs35130793       | chr20    | 55792165  | A/C     | I   | $2.9 \times 10^{-9}$  | 0.025  | [0.017,0.033]   | [BMP7]                        |
| 14q32.13 | rs2224309        | chr14    | 95333678  | A/C     | I   | $3.8 \times 10^{-9}$  | -0.031 | [-0.041,-0.021] | GSC--[---DICER1               |
| 9q22.31  | rs10761129       | chr9     | 94486321  | C/T     | I   | $6.9 \times 10^{-9}$  | -0.026 | [-0.034,-0.017] | [ROR2]                        |
| 6p21.1   | 6:44820741:AG_A  | chr6     | 44820741  | D/I     | I   | $1.2 \times 10^{-8}$  | -0.024 | [-0.032,-0.016] | [SUPT3H]                      |
| 17q24.3  | rs34091987       | chr17    | 70025587  | C/T     | I   | $3.1 \times 10^{-8}$  | 0.025  | [0.016,0.034]   | [---SOX9<br>ALX1---[---RASSF9 |
| 12q21.31 | rs10779169       | chr12    | 85967804  | A/G     | I   | $3.6 \times 10^{-8}$  | -0.023 | [-0.031,-0.015] |                               |
| 3p12.3   | rs424737         | chr3     | 78815906  | A/G     | I   | $4.6 \times 10^{-8}$  | -0.025 | [-0.033,-0.016] | [ROBO1]                       |
| 14q24.1  | rs34702092       | chr14    | 68991747  | D/I     | I   | $5.1 \times 10^{-8}$  | -0.026 | [-0.035,-0.016] | [RAD51B]                      |
| 20q12    | rs6101567        | chr20    | 38105055  | A/G     | I   | $6.7 \times 10^{-8}$  | 0.023  | [0.014,0.031]   | DHX35---[                     |

|         |             |       |           |     |   |                      |        |                 |                    |
|---------|-------------|-------|-----------|-----|---|----------------------|--------|-----------------|--------------------|
| 3q25.31 | rs11717138  | chr3  | 156534628 | C/T | I | $1.8 \times 10^{-7}$ | -0.025 | [-0.035,-0.016] | TIPARP---[-]-LEKR1 |
| 6p12.2  | rs142900698 | chr6  | 52834739  | C/G | I | $1.8 \times 10^{-7}$ | -0.267 | [-0.367,-0.166] | GSTA3--[-]-GSTA4   |
| Xq21.1  | rs5959351   | chrX  | 78675583  | C/T | I | $2.1 \times 10^{-7}$ | 0.018  | [0.011,0.025]   | ITM2A--[-]-TBX22   |
| 16q24.1 | rs61646804  | chr16 | 86608897  | D/I | I | $2.4 \times 10^{-7}$ | 0.029  | [0.018,0.041]   | FOXC2-[-]-FOX11    |
| 2q36.1  | rs34460569  | chr2  | 223026935 | C/T | I | $2.5 \times 10^{-7}$ | -0.025 | [-0.035,-0.016] | EPHA4---[-]-PAX3   |
| 4q24    | rs6851148   | chr4  | 101218062 | A/C | I | $2.8 \times 10^{-7}$ | -0.023 | [-0.032,-0.014] | DDIT4L---[-]-EMCN  |
| 8p23.1  | rs11782517  | chr8  | 10113507  | C/T | I | $3.8 \times 10^{-7}$ | 0.024  | [0.015,0.034]   | [MSRA]             |
| 8p22    | rs767764    | chr8  | 13199810  | C/G | I | $4.0 \times 10^{-7}$ | 0.025  | [0.016,0.035]   | [DLC1]             |

## Quality Statistics for Index SNPs

| assay.name       | is.v2 | is.v3 | is.v4 | gt.rate | hw.p.value | p.date | freq.b | avg.rsqr | min.rsqr | p.batch               | dose.b | qc.mask |
|------------------|-------|-------|-------|---------|------------|--------|--------|----------|----------|-----------------------|--------|---------|
| 3:71227306:T_TGA | FALSE | FALSE | FALSE |         |            |        |        | 0.8571   | 0.8514   | 0.00026               | 0.3393 | v2v3v4  |
| rs13097965       | TRUE  | TRUE  | TRUE  | 0.9997  | 0.48       | 0.64   | 0.5292 | 0.9994   | 0.9968   | 0.62                  | 0.5271 | v2v3v4  |
| rs56063440       | FALSE | FALSE | FALSE |         |            |        |        | 0.9829   | 0.9764   | 0.073                 | 0.7192 | v2v3v4  |
| rs2929451        | FALSE | FALSE | FALSE |         |            |        |        | 0.9987   | 0.9980   | 0.21                  | 0.5182 | v2v3v4  |
| rs5781117        | FALSE | FALSE | FALSE |         |            |        |        | 0.9682   | 0.9650   | 0.44                  | 0.6763 | v2v3v4  |
| rs146188897      | FALSE | FALSE | FALSE |         |            |        |        | 0.9809   | 0.9783   | 0.79                  | 0.2529 | v2v3v4  |
| rs10809266       | FALSE | FALSE | FALSE |         |            |        |        | 0.9506   | 0.9037   | $3.5 \times 10^{-10}$ | 0.3371 | v2v3v4  |
| rs702489         | FALSE | TRUE  | TRUE  | 0.9998  | 0.0055     | 0.56   | 0.8663 | 0.9542   | 0.7763   | 0.072                 | 0.8669 | v2v3v4  |
| rs35130793       | FALSE | FALSE | FALSE |         |            |        |        | 0.9454   | 0.9304   | 0.0016                | 0.4843 | v2v3v4  |
| rs2224309        | FALSE | FALSE | FALSE |         |            |        |        | 0.9596   | 0.9337   | 0.74                  | 0.7981 | v2v3v4  |
| rs10761129       | FALSE | TRUE  | FALSE | 0.9993  | 0.045      | 0.74   | 0.6651 | 0.9906   | 0.9091   | 0.57                  | 0.6653 | v2v3v4  |
| 6:44820741:AG_A  | FALSE | FALSE | FALSE |         |            |        |        | 0.9880   | 0.9856   | 0.41                  | 0.4788 | v2v3v4  |
| rs34091987       | FALSE | FALSE | FALSE |         |            |        |        | 0.9877   | 0.9839   | 0.48                  | 0.3072 | v2v3v4  |
| rs10779169       | FALSE | FALSE | FALSE |         |            |        |        | 0.9961   | 0.9955   | 0.67                  | 0.4156 | v2v3v4  |
| rs424737         | FALSE | FALSE | FALSE |         |            |        |        | 0.9901   | 0.9824   | 0.44                  | 0.6996 | v2v3v4  |
| rs34702092       | FALSE | FALSE | FALSE |         |            |        |        | 0.9842   | 0.9748   | 0.093                 | 0.2650 | v2v3v4  |
| rs6101567        | FALSE | FALSE | FALSE |         |            |        |        | 0.9850   | 0.9806   | 0.077                 | 0.5081 | v2v3v4  |
| rs11717138       | FALSE | FALSE | FALSE |         |            |        |        | 0.9892   | 0.9787   | 0.69                  | 0.2389 | v2v3v4  |
| rs142900698      | FALSE | FALSE | FALSE |         |            |        |        | 0.9821   | 0.9180   | $2.1 \times 10^{-5}$  | 0.9983 | v2v3v4  |
| rs5959351        | FALSE | FALSE | FALSE |         |            |        |        | 0.9895   | 0.9848   | 0.0030                | 0.6179 | v2v3v4  |
| rs61646804       | FALSE | FALSE | FALSE |         |            |        |        | 0.8464   | 0.7628   | $5.1 \times 10^{-16}$ | 0.8133 | v2v3v4  |
| rs34460569       | FALSE | FALSE | FALSE |         |            |        |        | 0.9863   | 0.9737   | 0.079                 | 0.2299 | v2v3v4  |
| rs6851148        | FALSE | FALSE | FALSE |         |            |        |        | 0.9155   | 0.8283   | $3.1 \times 10^{-10}$ | 0.3718 | v2v3v4  |
| rs11782517       | FALSE | FALSE | FALSE |         |            |        |        | 0.9919   | 0.9762   | 0.40                  | 0.7549 | v2v3v4  |
| rs767764         | FALSE | FALSE | FALSE |         |            |        |        | 0.9973   | 0.9914   | 0.72                  | 0.2123 | v2v3v4  |

## SNP Statistics in the GWAS Sample

| assay.name       | AA.0  | AB.0  | BB.0  | im.num.0 | dose.b.0 |
|------------------|-------|-------|-------|----------|----------|
| 3:71227306:T_TGA |       |       |       | 67023    | 0.3338   |
| rs13097965       | 14920 | 33304 | 18779 | 67023    | 0.5288   |
| rs56063440       |       |       |       | 67023    | 0.7153   |
| rs2929451        |       |       |       | 67023    | 0.5169   |
| rs5781117        |       |       |       | 67023    | 0.6743   |
| rs146188897      |       |       |       | 67023    | 0.2563   |
| rs10809266       |       |       |       | 67023    | 0.3418   |
| rs702489         | 1096  | 13372 | 44576 | 67023    | 0.8704   |
| rs35130793       |       |       |       | 67023    | 0.4863   |
| rs2224309        |       |       |       | 67023    | 0.7976   |
| rs10761129       | 6233  | 25019 | 24849 | 67023    | 0.6671   |
| 6:44820741:AG_A  |       |       |       | 67023    | 0.4766   |
| rs34091987       |       |       |       | 67023    | 0.3081   |
| rs10779169       |       |       |       | 67023    | 0.4140   |
| rs424737         |       |       |       | 67023    | 0.7006   |
| rs34702092       |       |       |       | 67023    | 0.2683   |
| rs6101567        |       |       |       | 67023    | 0.5034   |
| rs11717138       |       |       |       | 67023    | 0.2385   |
| rs142900698      |       |       |       | 67023    | 0.9983   |
| rs5959351        |       |       |       | 67023    | 0.6164   |
| rs61646804       |       |       |       | 67023    | 0.8122   |
| rs34460569       |       |       |       | 67023    | 0.2309   |
| rs6851148        |       |       |       | 67023    | 0.3661   |
| rs11782517       |       |       |       | 67023    | 0.7554   |
| rs767764         |       |       |       | 67023    | 0.2137   |

## Annotations from NHGRI GWAS Catalog

The following table shows, for each index SNP, all entries in the NHGRI GWAS Catalog that are within 500kb and in at least moderate linkage disequilibrium ( $r^2 > 0.5$ ).

| region | position  | our.name  | our.pval              | dist  | rsqr  | assay.name | pvalue               | pubmed.id | trait                                                 | genes   |
|--------|-----------|-----------|-----------------------|-------|-------|------------|----------------------|-----------|-------------------------------------------------------|---------|
| 1q41   | 219642187 | rs5781117 | $1.9 \times 10^{-10}$ | 2037  | 0.866 | rs2605100  | $3.0 \times 10^{-8}$ | 19557161  | Adiposity                                             | LYPLAL1 |
| 1q41   | 219642187 | rs5781117 | $1.9 \times 10^{-10}$ | 51033 | 0.527 | rs2820464  | $7.0 \times 10^{-9}$ | 23563607  | Waist-hip ratio                                       | LYPLAL1 |
| 1q41   | 219642187 | rs5781117 | $1.9 \times 10^{-10}$ | 58332 | 0.522 | rs2785980  | $2.0 \times 10^{-8}$ | 22581228  | Fasting insulin-related traits (interaction with BMI) | LYPLAL1 |
| 1q41   | 219642187 | rs5781117 | $1.9 \times 10^{-10}$ | 85592 | 0.558 | rs3001032  | $4.0 \times 10^{-8}$ | 22479202  | Adiponectin levels                                    | LYPLAL1 |

|         |          |            |                      |        |       |            |                       |          |                        |         |
|---------|----------|------------|----------------------|--------|-------|------------|-----------------------|----------|------------------------|---------|
| 14q24.1 | 68991747 | rs34702092 | $5.1 \times 10^{-8}$ | -5590  | 0.951 | rs11624164 | $5.0 \times 10^{-6}$  | 23251661 | Obesity-related traits | RAD51L1 |
| 14q24.1 | 68991747 | rs34702092 | $5.1 \times 10^{-8}$ | 42935  | 0.787 | rs999737   | $3.0 \times 10^{-19}$ | 23535729 | Breast cancer          | RAD51L1 |
| 14q24.1 | 68991747 | rs34702092 | $5.1 \times 10^{-8}$ | 42935  | 0.787 | rs999737   | $2.0 \times 10^{-7}$  | 19330030 | Breast cancer          | RAD51L1 |
| Xq21.1  | 78675583 | rs5959351  | $2.1 \times 10^{-7}$ | -26390 | 0.749 | rs1474563  | $3.0 \times 10^{-6}$  | 18391951 | Height                 | ITM2A   |

## Replication of GWAS Catalog Results

The following table shows, for each GWAS Catalog result for similar traits, our association test result for our best available proxy (distance < 100kb,  $r^2 > 0.8$ ).

*no relevant GWAS catalog terms were available*

## Nearby Nonsynonymous SNPs

| region  | position | our.name   | our.pval             | dist | rsqr  | assay.name | gene | aa.chg |
|---------|----------|------------|----------------------|------|-------|------------|------|--------|
| 9q22.31 | 94486321 | rs10761129 | $6.9 \times 10^{-9}$ | 0    | 1.000 | rs10761129 | ROR2 | V819I  |

## Nearby Expression QTLs

| region   | position | our.name   | our.pval              | dist   | rsqr  | assay.name | eqtl.dist | eqtl.gene | eqtl.pval             | eqtl.rsqr | tissue   | pubmed.id |
|----------|----------|------------|-----------------------|--------|-------|------------|-----------|-----------|-----------------------|-----------|----------|-----------|
| 3p14.3   | 54731374 | rs56063440 | $5.5 \times 10^{-11}$ | 50257  | 0.618 | rs11914780 | -2222994  | NT5DC2    | 0.00071               | 0.040     | B-Cell   | 22446964  |
| 8p23.1   | 9085295  | rs2929451  | $6.4 \times 10^{-11}$ | -55882 | 0.650 | rs435581   | -2285766  | DEFA4     | 0.00052               | 0.042     | B-Cell   | 22446964  |
| 8p23.1   | 9085295  | rs2929451  | $6.4 \times 10^{-11}$ | -55882 | 0.650 | rs435581   | -281782   | MFHAS1    | $4.6 \times 10^{-7}$  | 0.087     | B-Cell   | 22446964  |
| 8p23.1   | 9085295  | rs2929451  | $6.4 \times 10^{-11}$ | -78    | 0.924 | rs2929305  | -523730   | CLDN23    | $1.6 \times 10^{-5}$  | 0.065     | Monocyte | 22446964  |
| 8p23.1   | 9085295  | rs2929451  | $6.4 \times 10^{-11}$ | 0      | 1.000 | rs2929451  | 334164    | MFHAS1    | $2.2 \times 10^{-10}$ | 0.029     | Monocyte | 20502693  |
| 20q13.31 | 55792165 | rs35130793 | $2.9 \times 10^{-9}$  | 14175  | 0.574 | rs186659   | -183952   | HS.132453 | 0.00020               | 0.048     | Monocyte | 22446964  |
| 9q22.31  | 94486321 | rs10761129 | $6.9 \times 10^{-9}$  | 0      | 1.000 | rs10761129 | 568474    | SNORA84   | 0.00011               | 0.052     | Monocyte | 22446964  |

## Nearby Clinical Variants

*no hits were found for clinical variants*

## Regional Association Plots

*locuszoom plot for 3:71227306:T\_TGA failed*

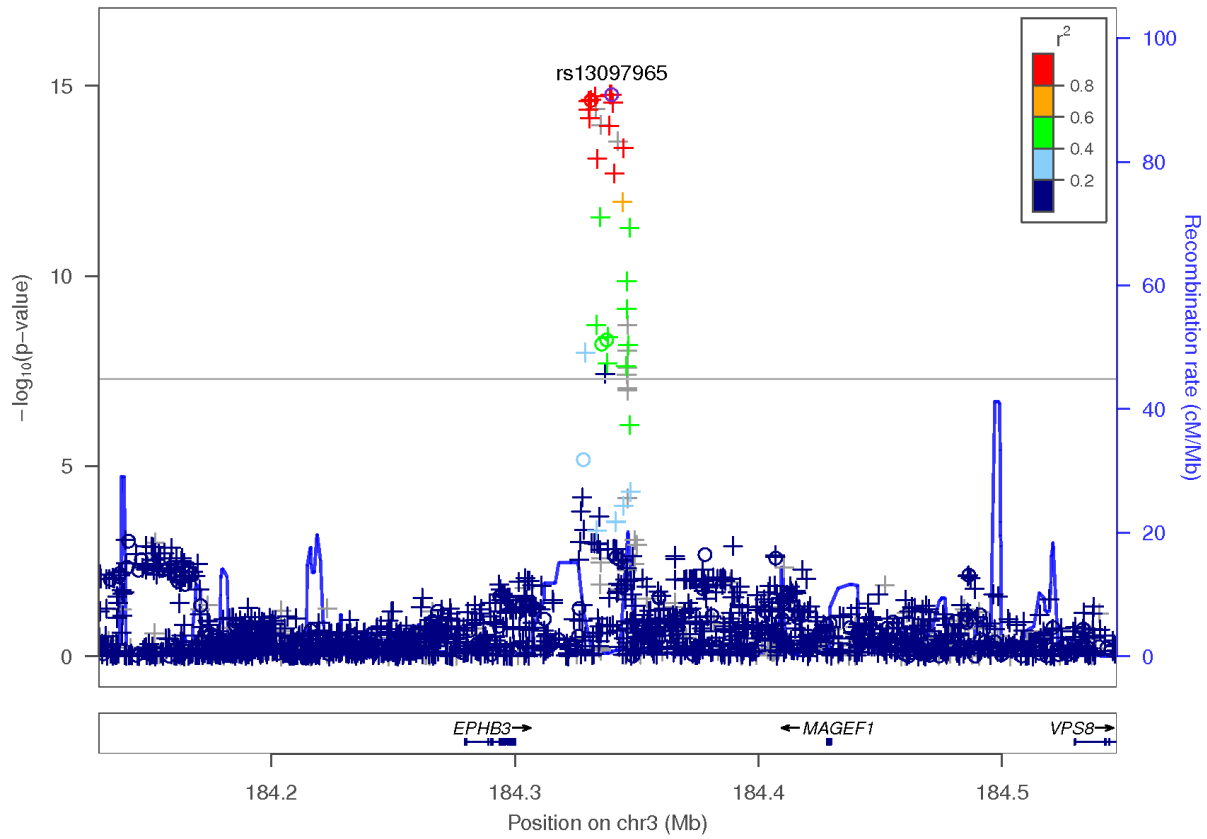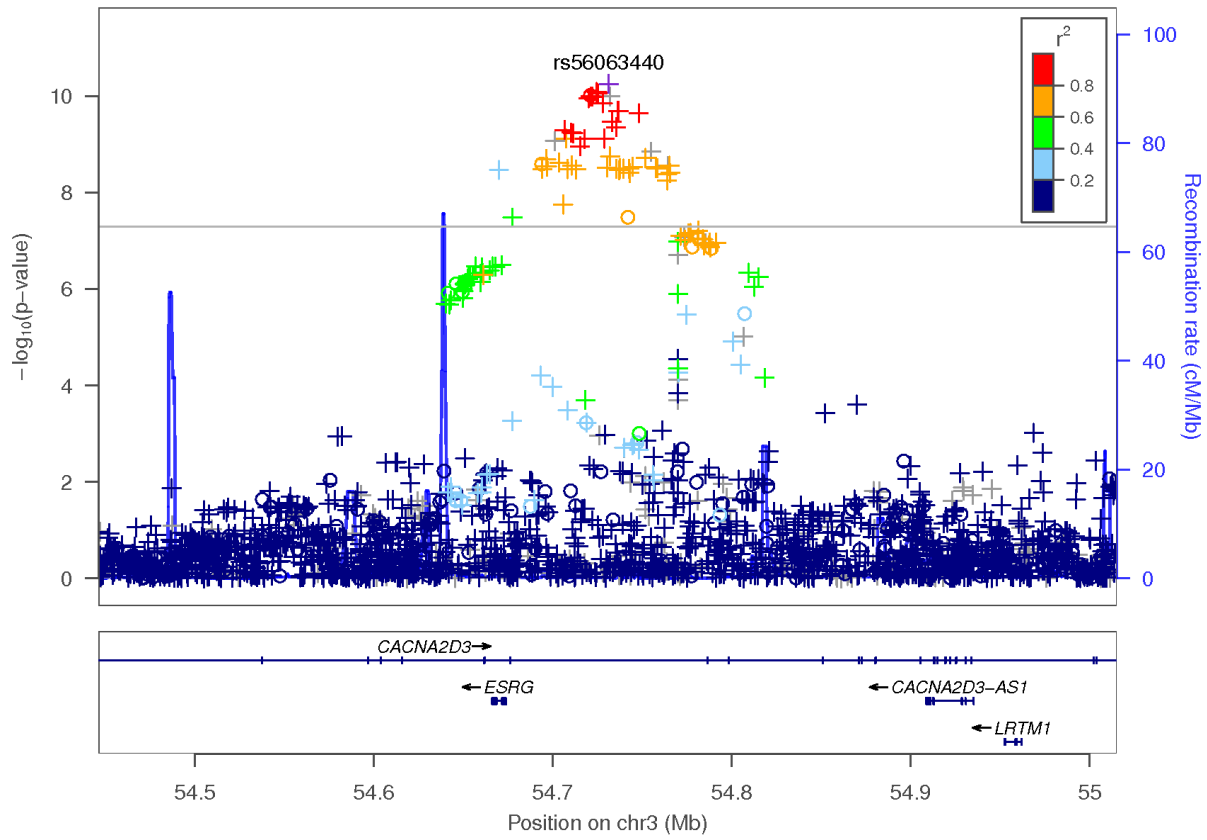

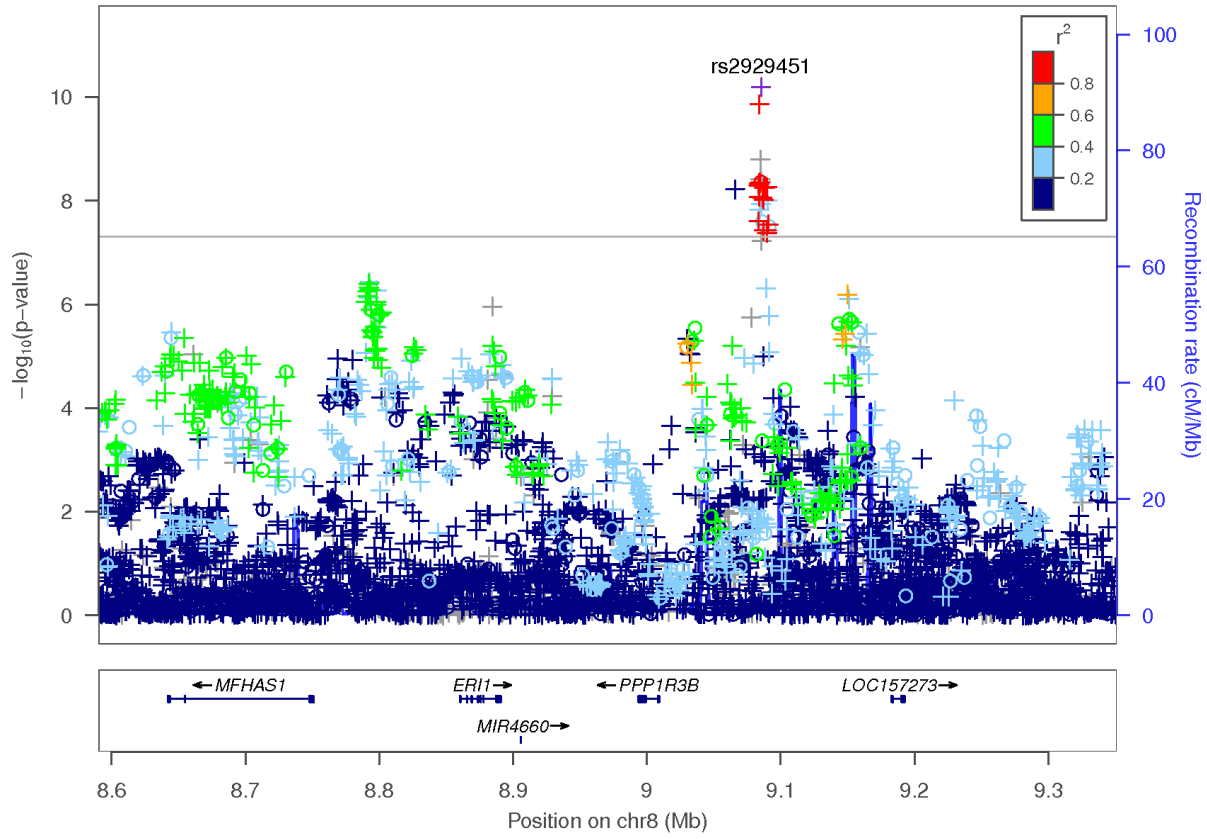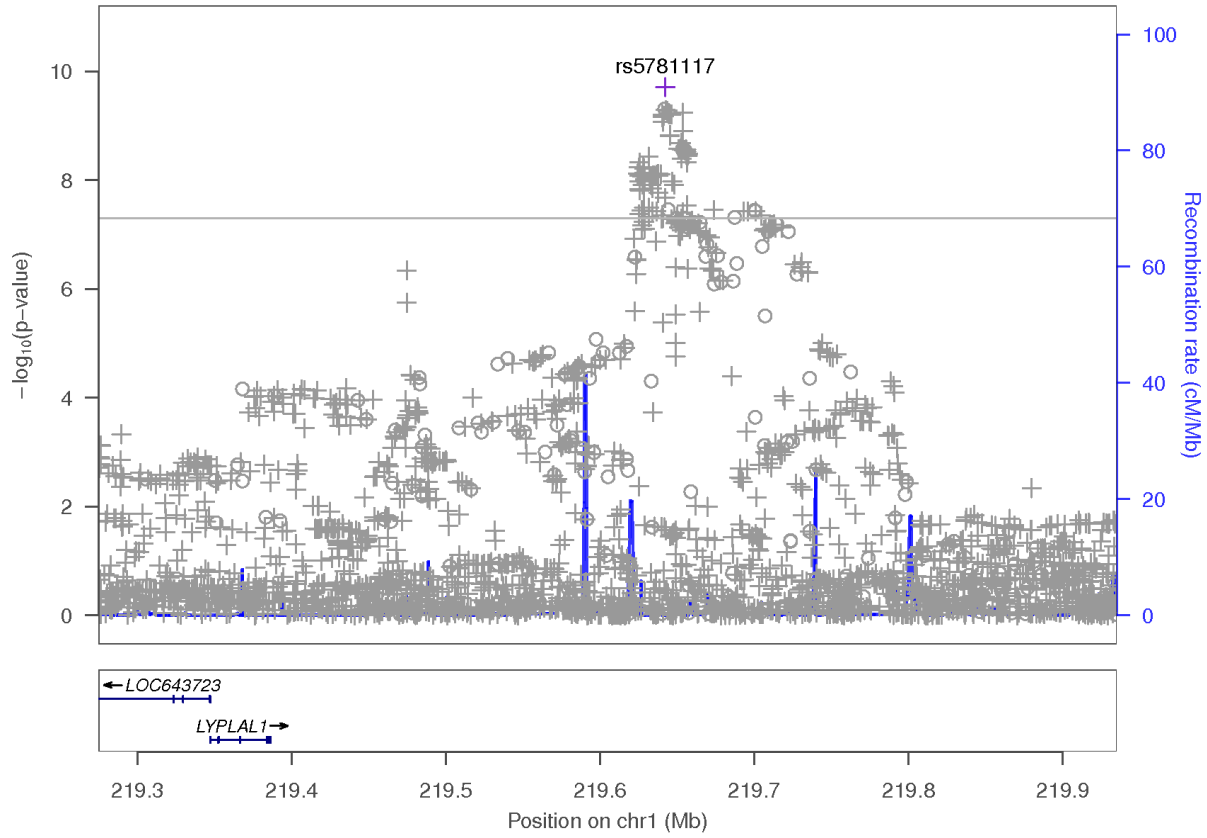

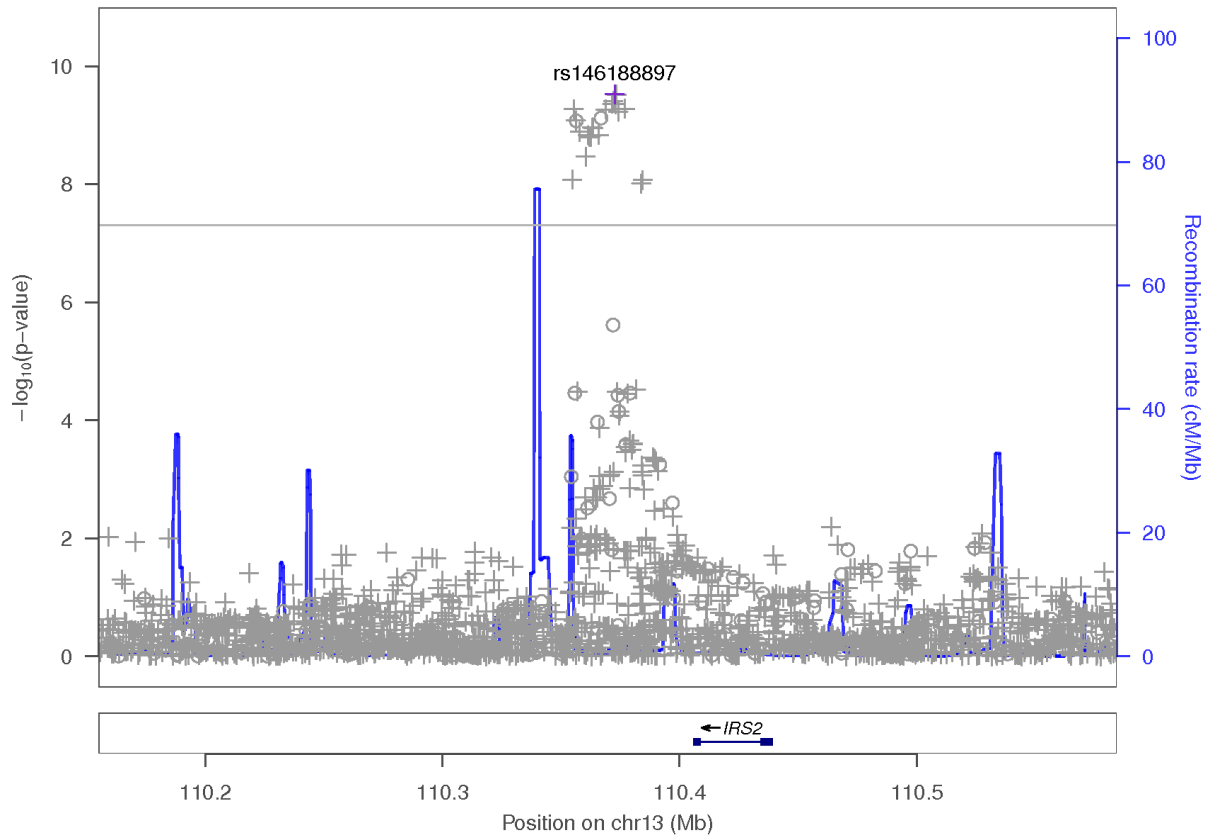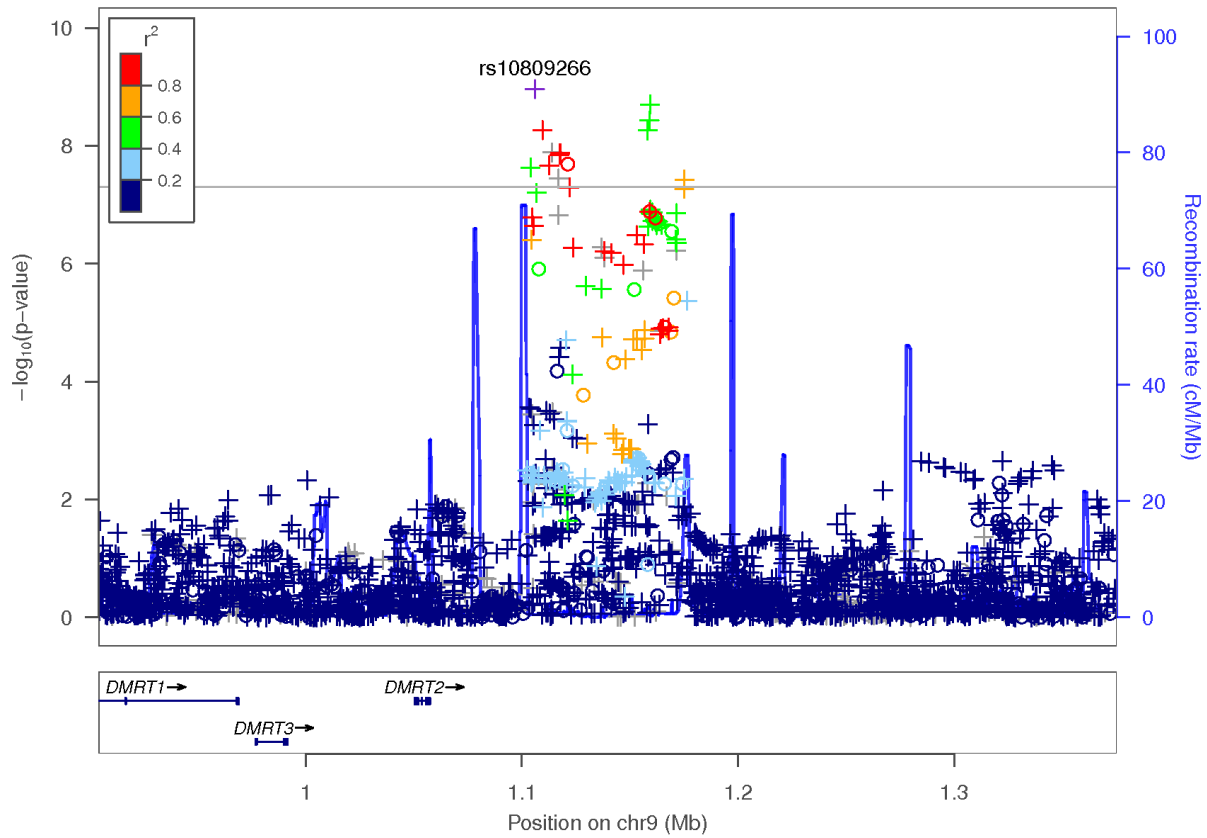



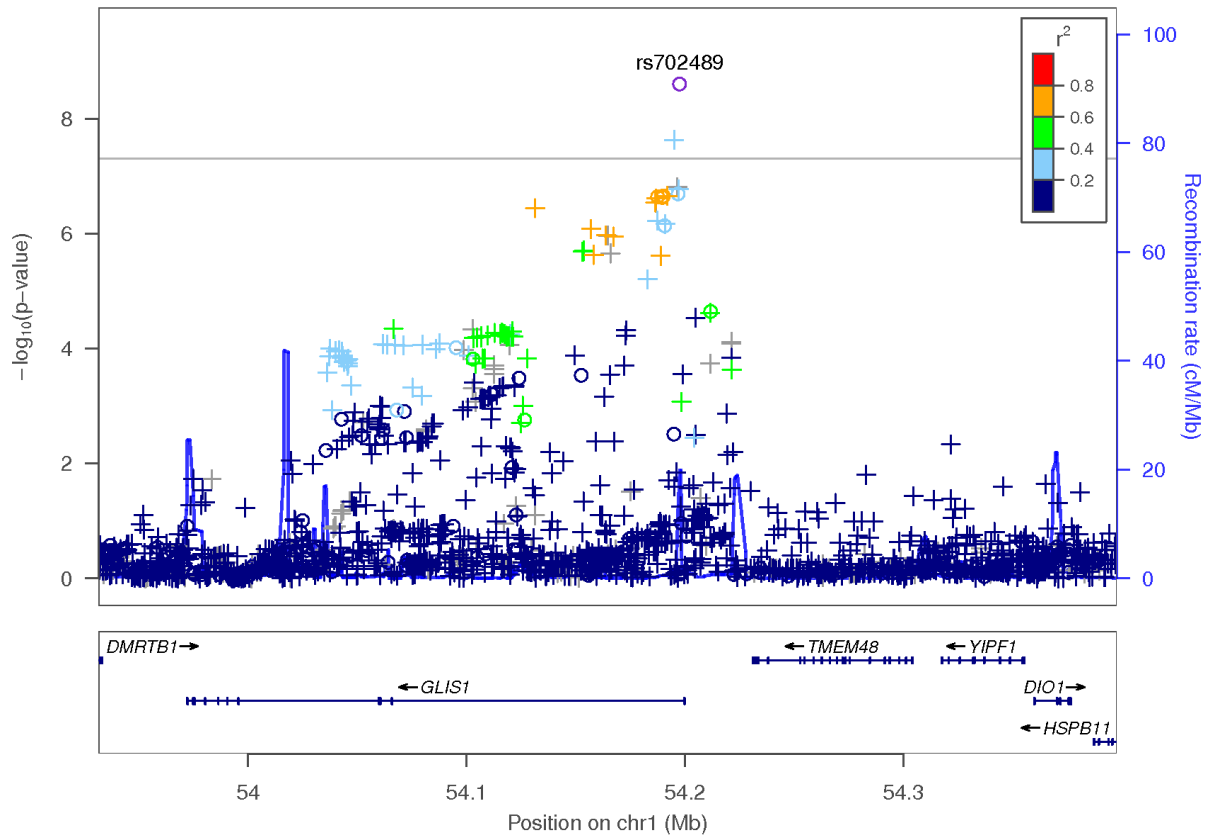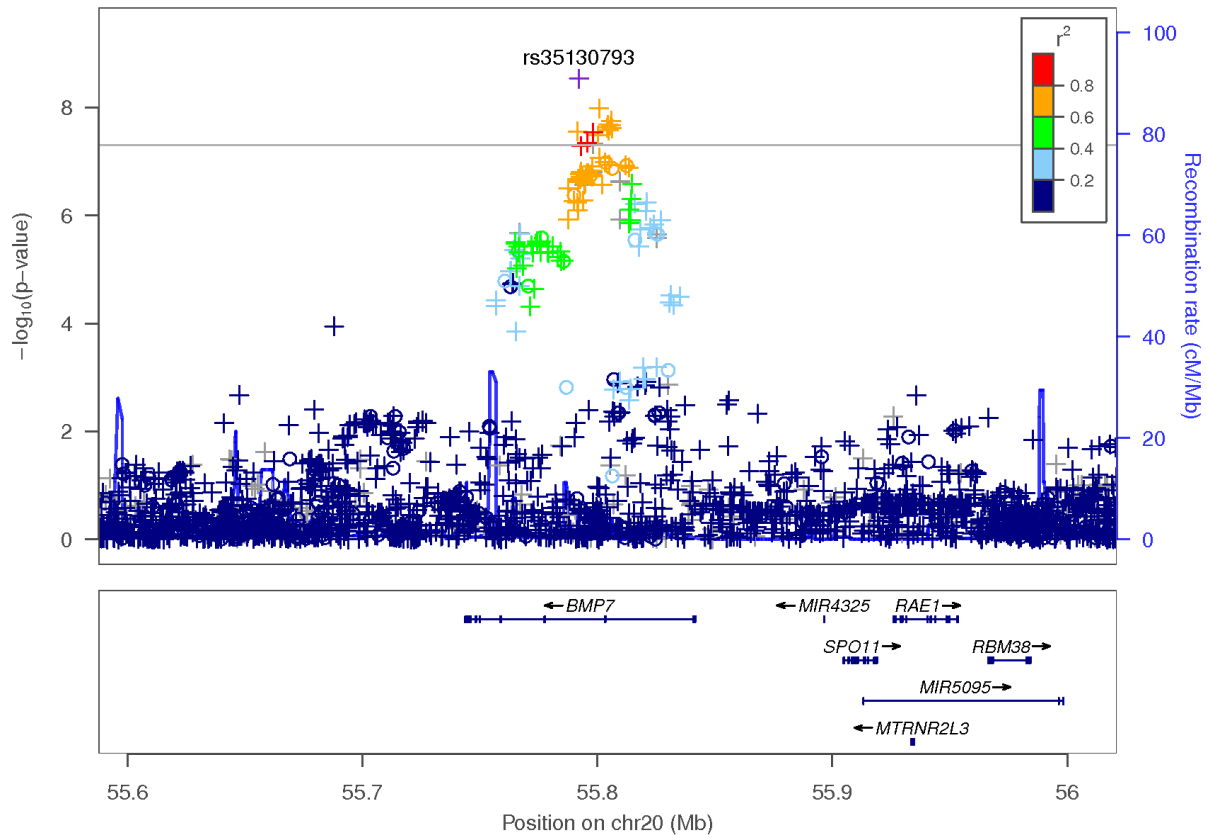

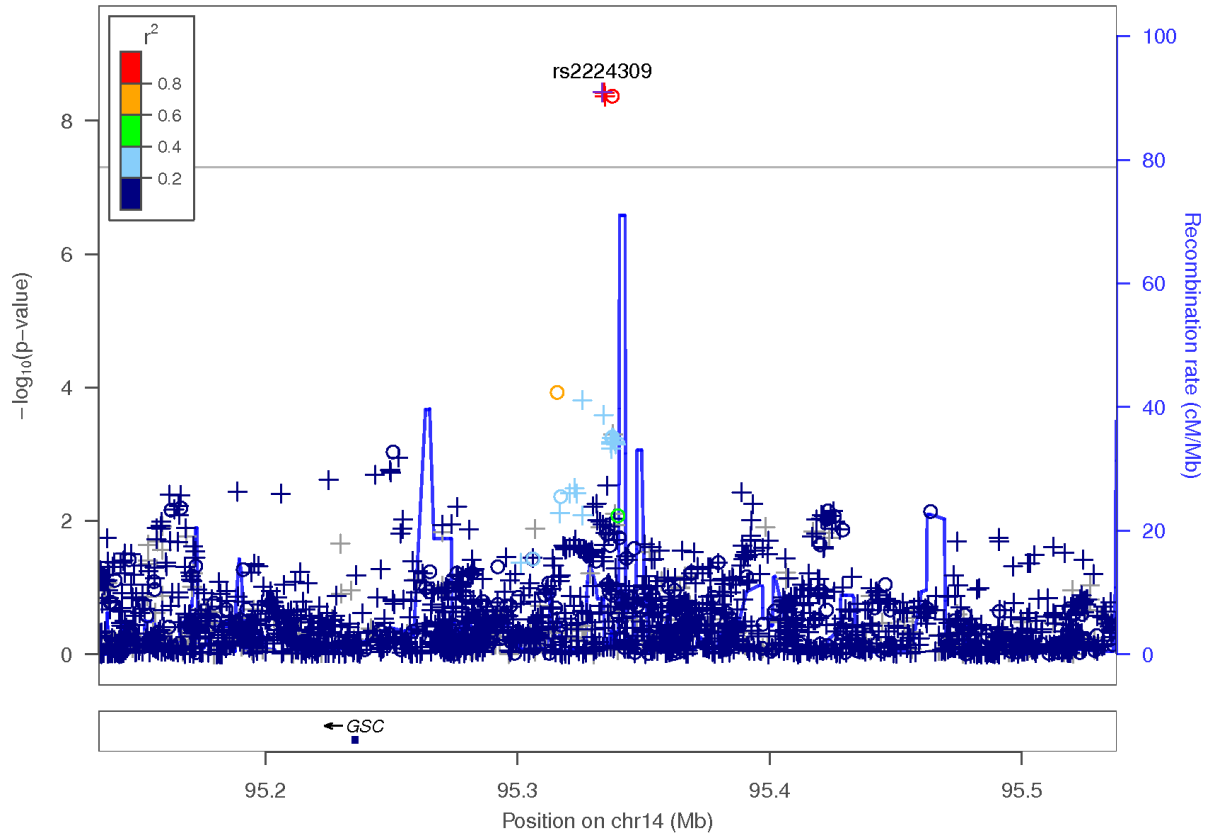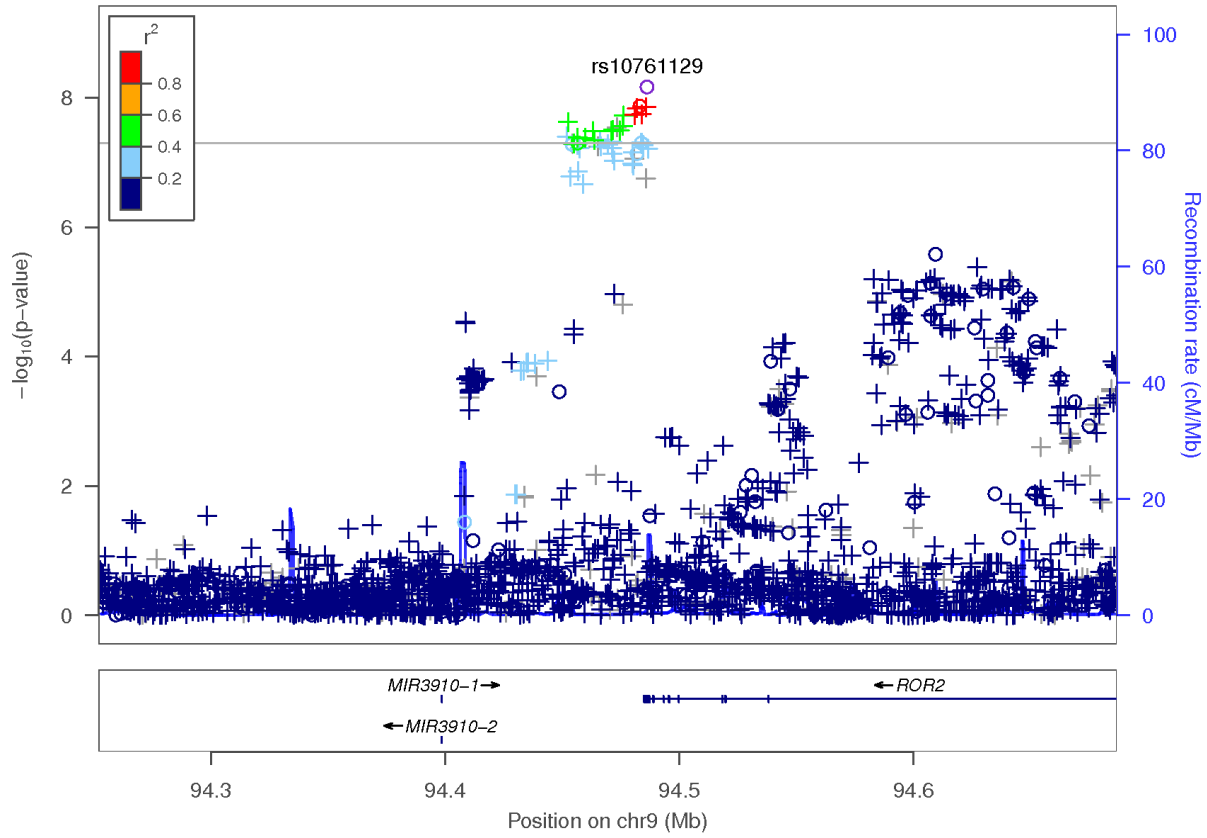

locuszoom plot for 6:44820741:AG\_A failed

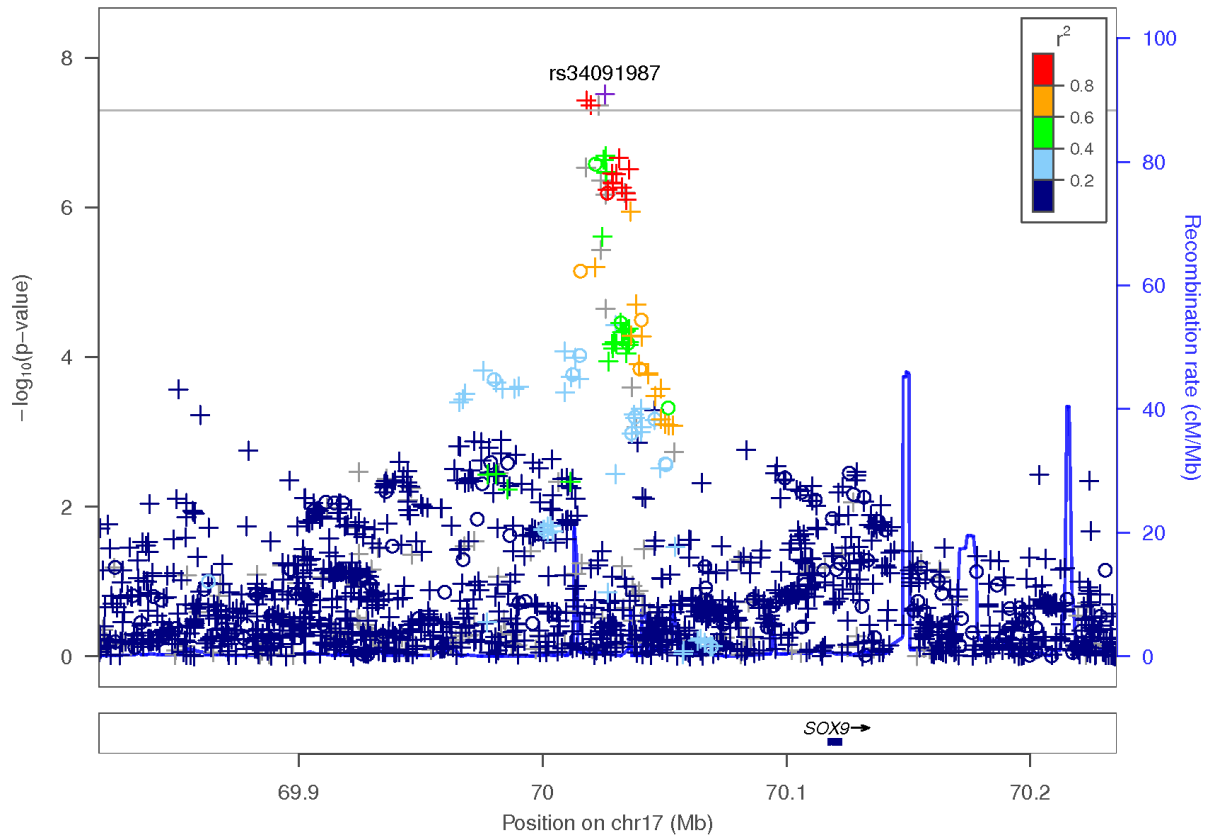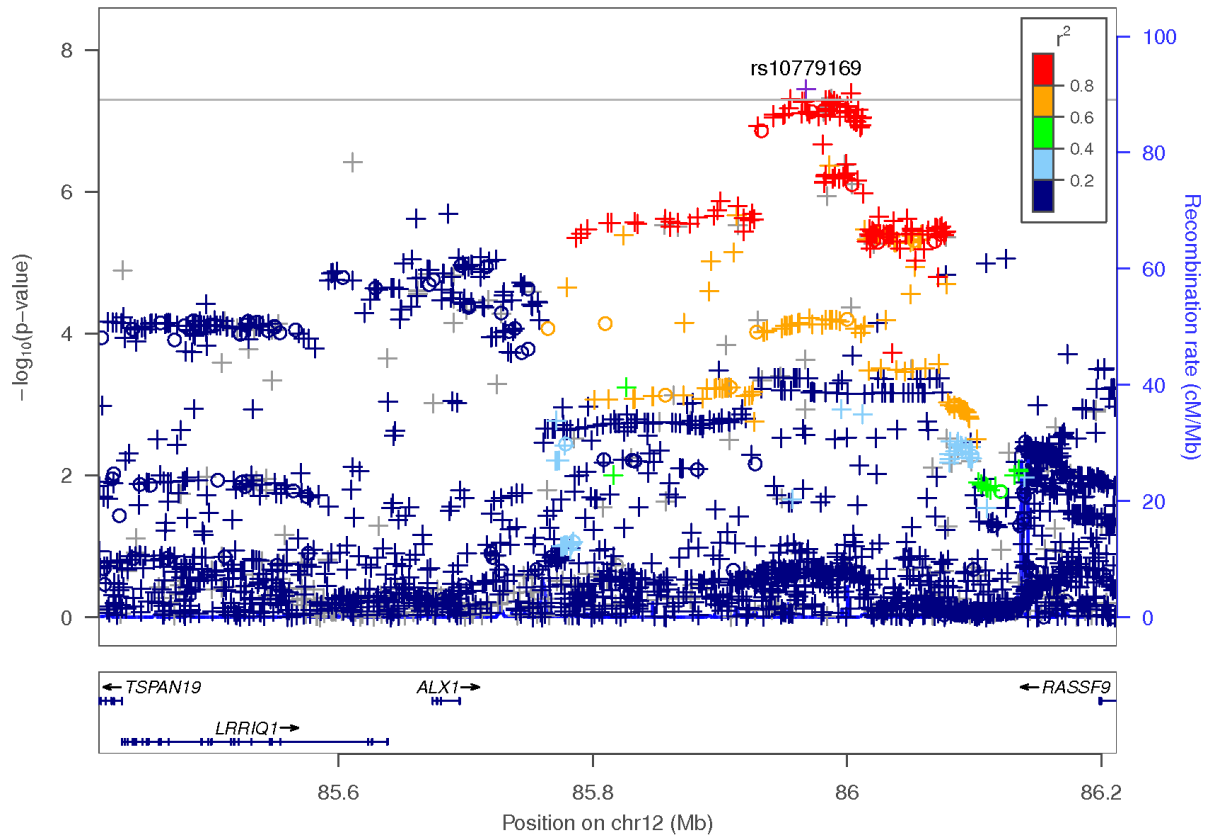

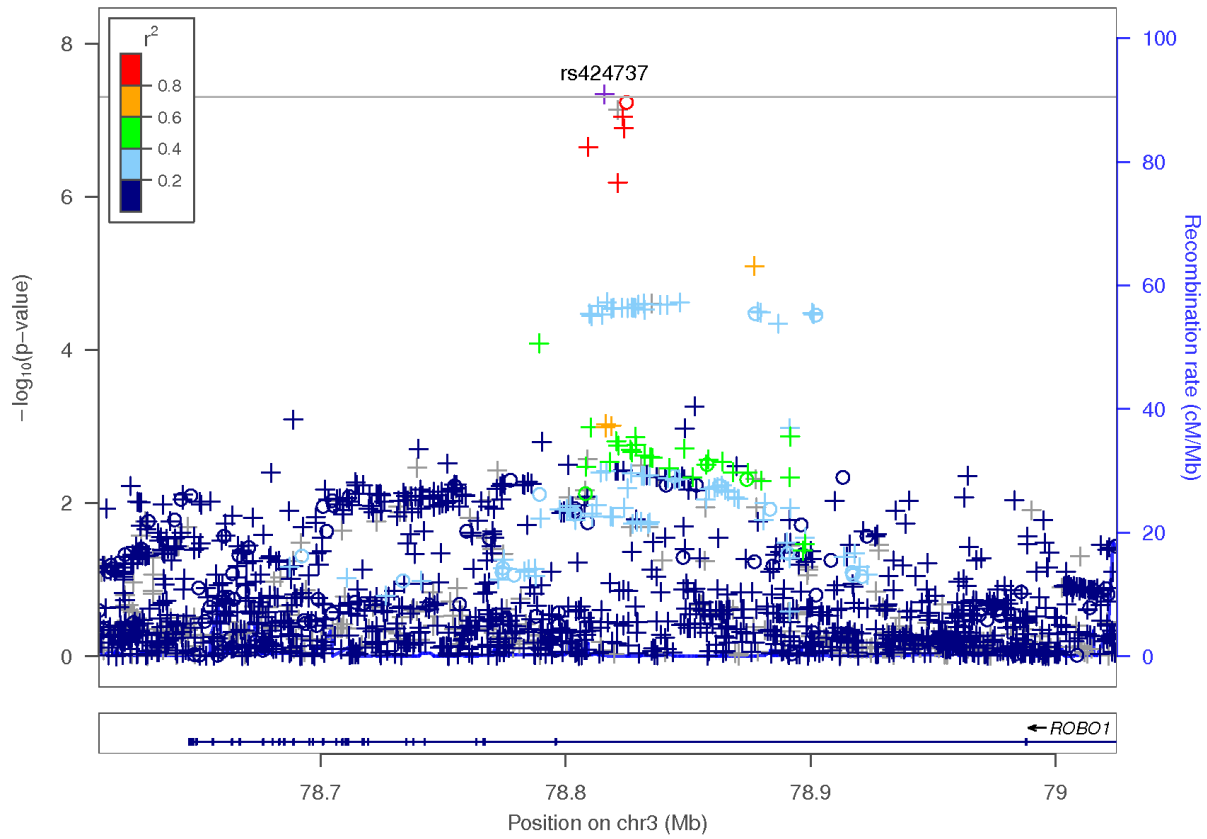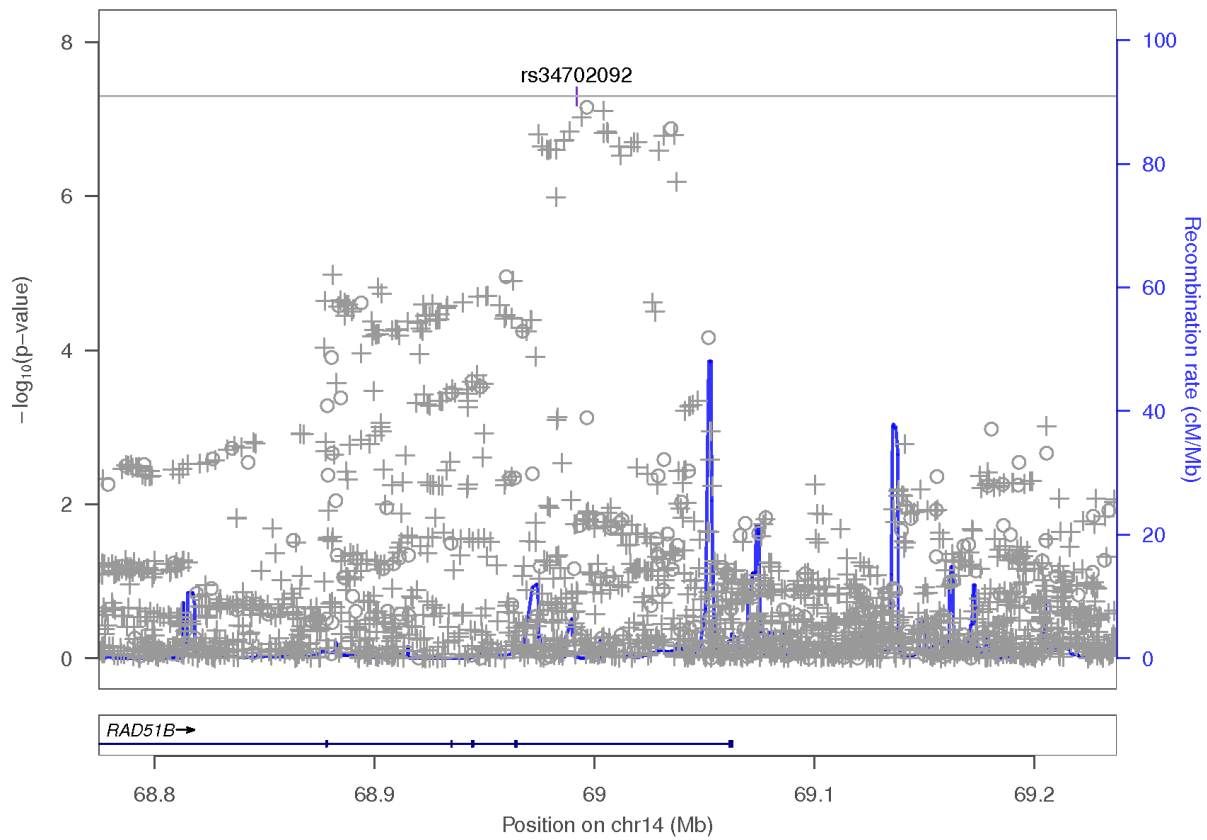

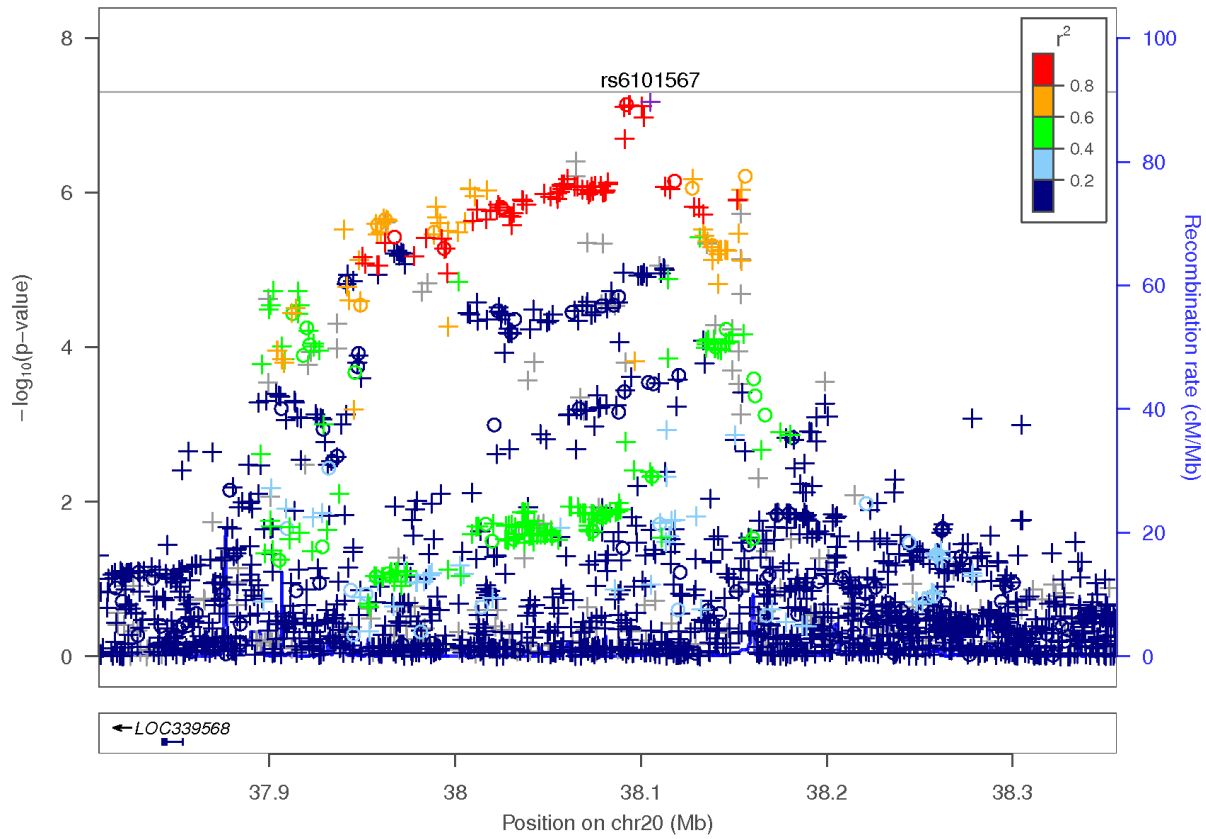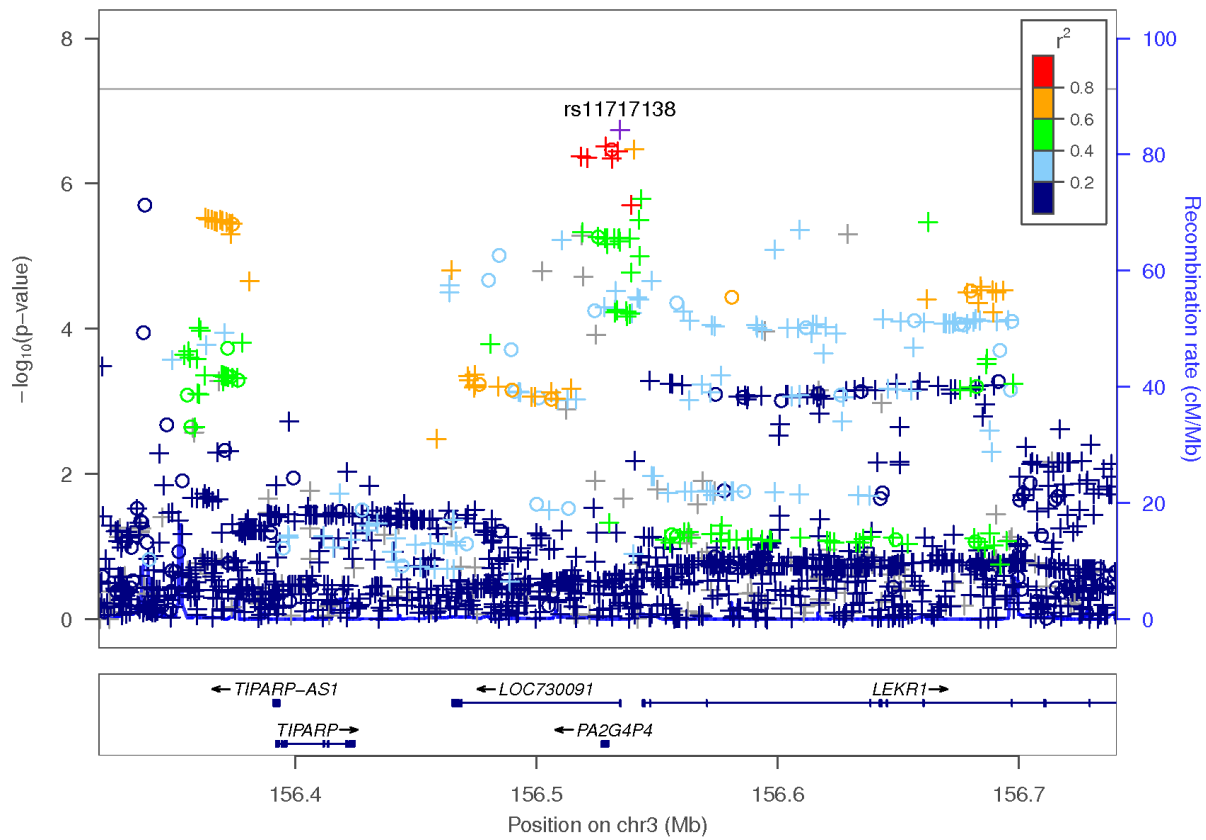

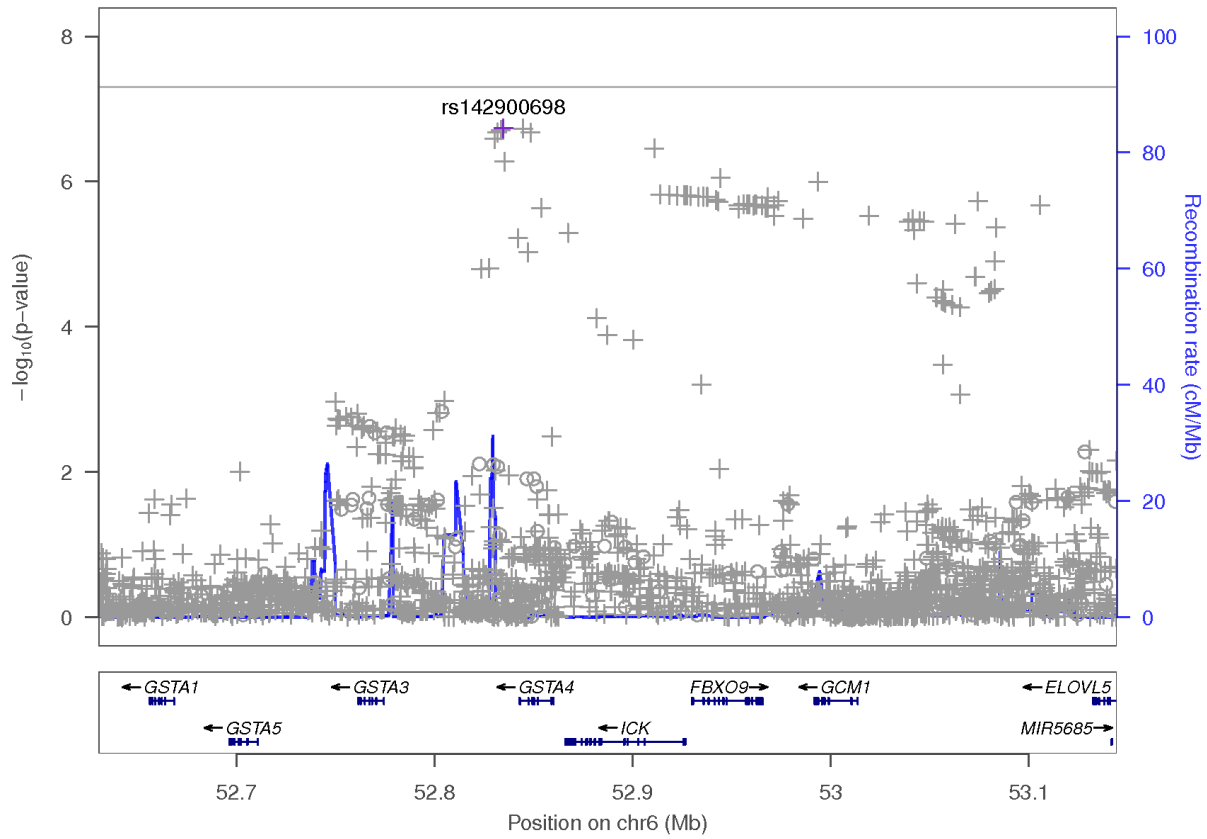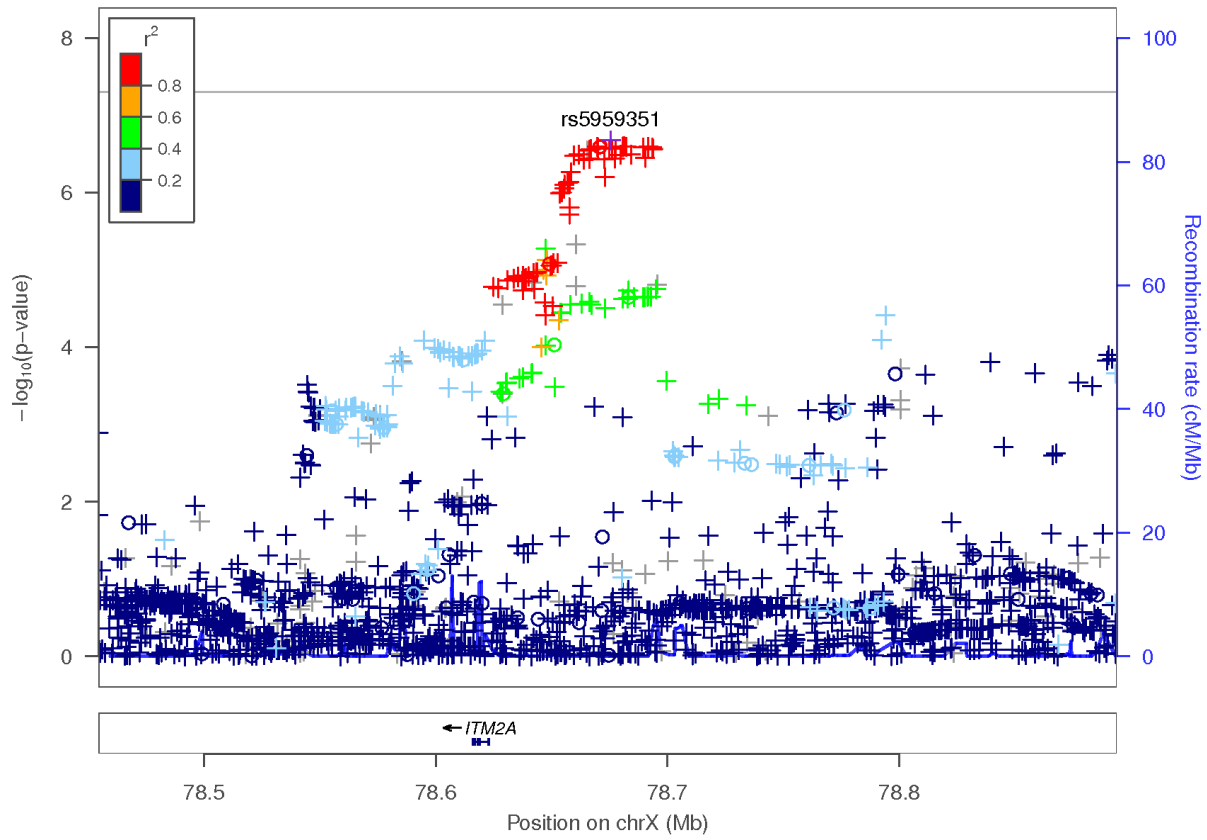

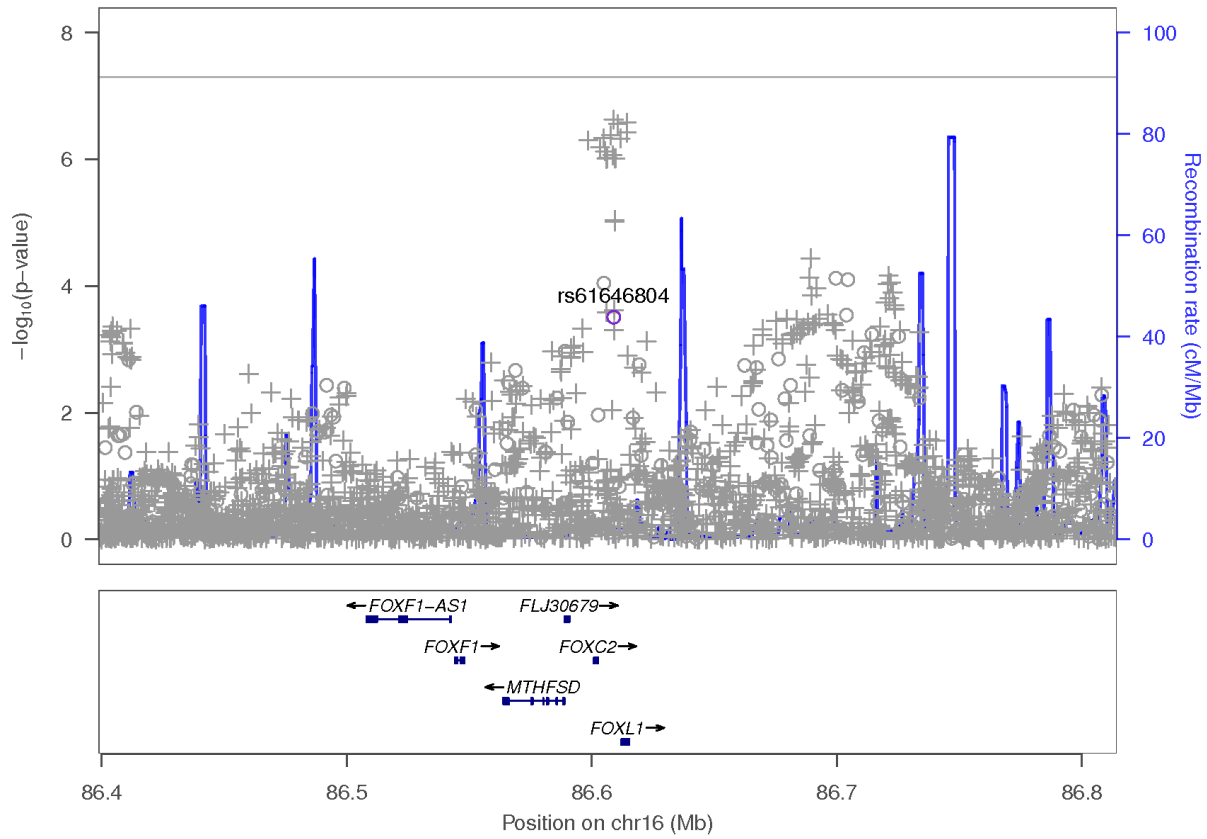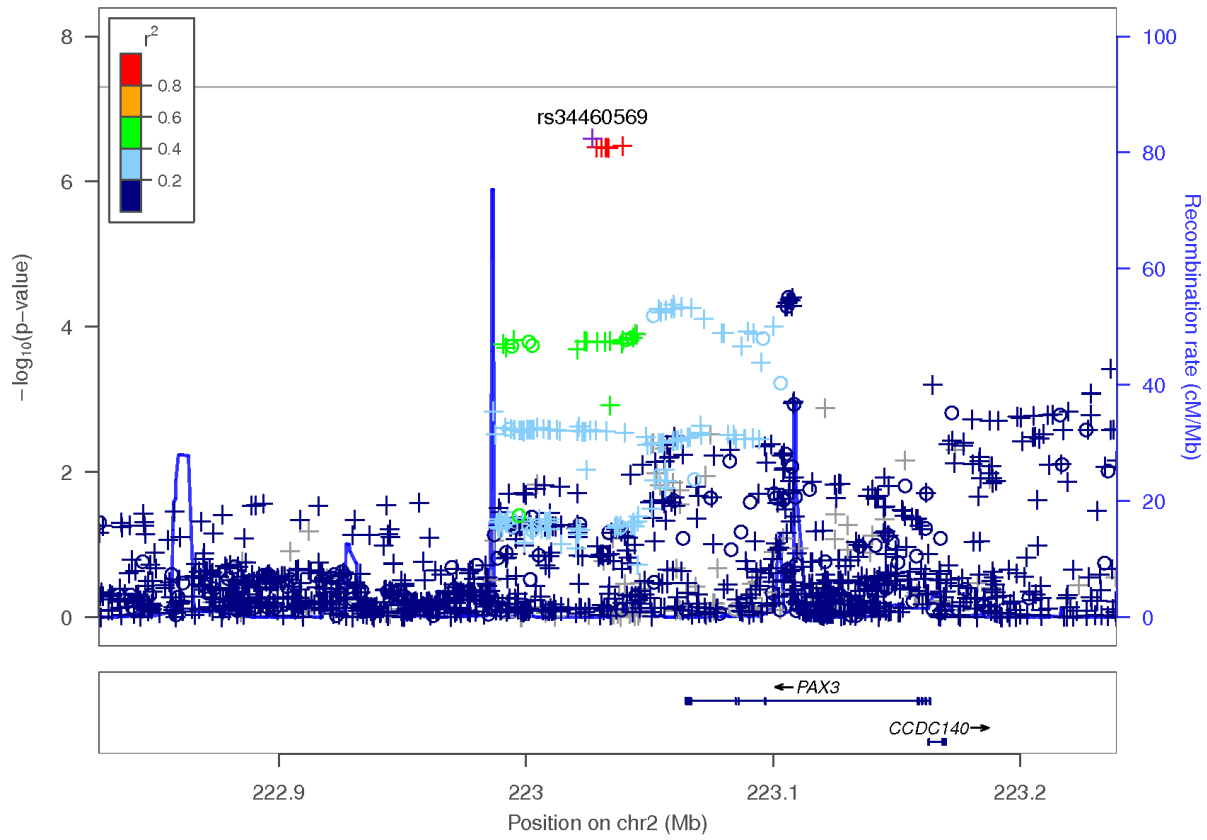

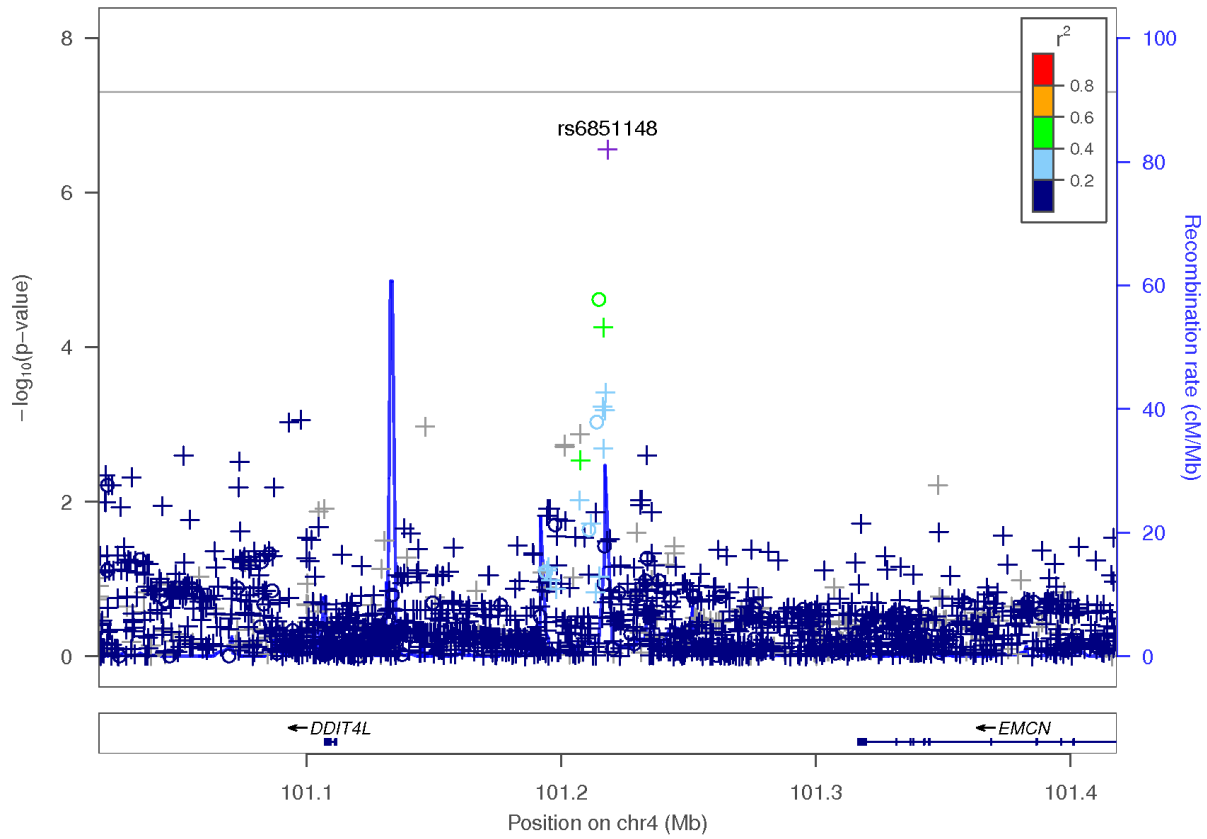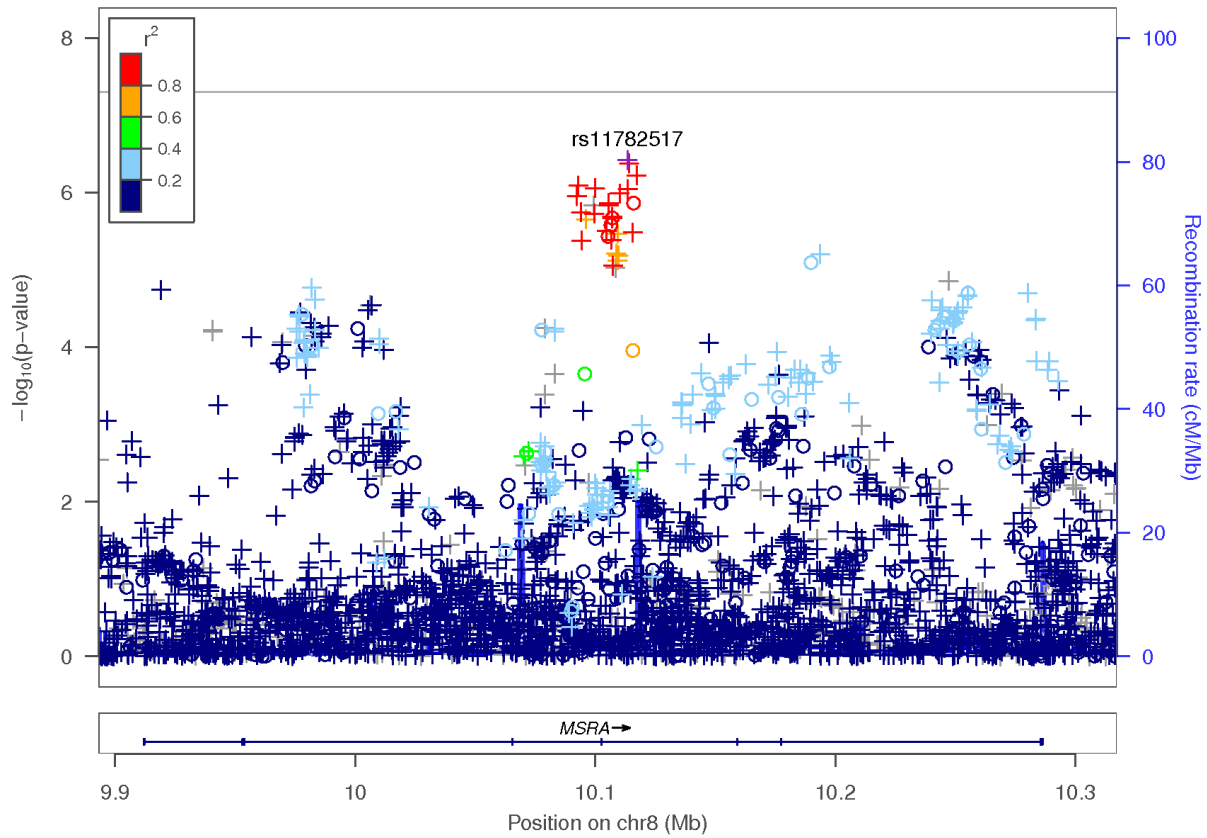



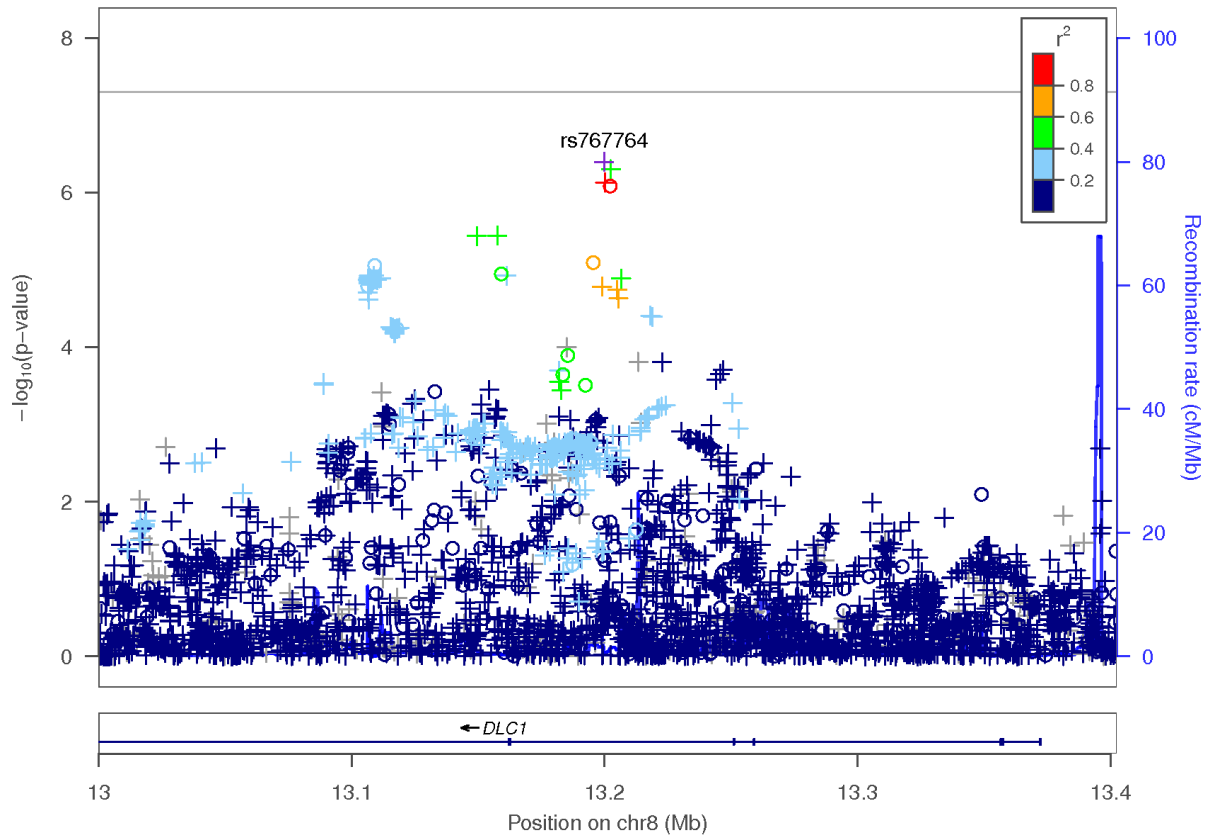

Supplement: NIHMS780506-supplement-19.pdf [file NIHMS780506-supplement-19.pdf]
